# Supplementary material
Source: publisher figshare collection journal article supplement (https://plos.figshare.com/articles/dataset/_/1259769)
Supplement: Supplementary file 1 [file 1]

Archive with 12 entries (12 files):
- Figure_S1.pdf
- Figure_S2.pdf
- Figure_S3.pdf
- Figure_S4.pdf
- Figure_S5.pdf
- Table_S1.pdf
- Table_S2.xls
- Table_S3.xlsx
- Table_S4.xlsx
- Table_S5.xls
- Table_S6.xls
- Table_S7.xlsx
