# Supplementary material
Source: publisher figshare collection journal article supplement (https://plos.figshare.com/articles/dataset/_/1259769)
Supplement: Supplementary file 1 [file 1 › Table_S1.pdf]

|          |                            |                                                                           |     |     |     |     |     |     |  |
|----------|----------------------------|---------------------------------------------------------------------------|-----|-----|-----|-----|-----|-----|--|
| Table S1 | Consensus                  | 1                                                                         | 10  | 20  | 30  | 40  | 50  | 60  |  |
|          | Identity                   |                                                                           |     |     |     |     |     |     |  |
|          | 1. Drosophila melanogaster | MENVEEAPPLISSSSNSNSNNSSAS                                                 |     |     |     |     |     |     |  |
|          | 2. Anopheles gambiae       | MENVEEAPPLISSSSNSNSNNSSASSSSSSHQLSQSGAMGAGTAPSTSRSHSHSPTPSPPPVPASSHSDQPHF |     |     |     |     |     |     |  |
|          | 3. Danio rerio             |                                                                           |     |     |     |     |     |     |  |
|          | 4. Gallus gallus           |                                                                           |     |     |     |     |     |     |  |
|          | 5. Canis lupus             |                                                                           |     |     |     |     |     |     |  |
|          | 6. Bos taurus              |                                                                           |     |     |     |     |     |     |  |
|          | 7. Macaca mulatta          |                                                                           |     |     |     |     |     |     |  |
|          | 8. Rattus norvegicus       |                                                                           |     |     |     |     |     |     |  |
|          | 9. Mus musculus            |                                                                           |     |     |     |     |     |     |  |
|          | 10. Homo sapiens           |                                                                           |     |     |     |     |     |     |  |
|          | Consensus                  | 70                                                                        | 80  | 90  | 100 | 110 | 120 | 130 |  |
|          | Identity                   |                                                                           |     |     |     |     |     |     |  |
|          | 1. Drosophila melanogaster | DHPSPPLINASTETARENSPHDHSPTPTTFHOTAPPPTTSSSTAPQORDEREQOQQQQHAPPLOQDQQENSFA |     |     |     |     |     |     |  |
|          | 2. Anopheles gambiae       |                                                                           |     |     |     |     |     |     |  |
|          | 3. Danio rerio             |                                                                           |     |     |     |     |     |     |  |
|          | 4. Gallus gallus           |                                                                           |     |     |     |     |     |     |  |
|          | 5. Canis lupus             |                                                                           |     |     |     |     |     |     |  |
|          | 6. Bos taurus              |                                                                           |     |     |     |     |     |     |  |
|          | 7. Macaca mulatta          |                                                                           |     |     |     |     |     |     |  |
|          | 8. Rattus norvegicus       |                                                                           |     |     |     |     |     |     |  |
|          | 9. Mus musculus            |                                                                           |     |     |     |     |     |     |  |
|          | 10. Homo sapiens           |                                                                           |     |     |     |     |     |     |  |
|          | Consensus                  | 140                                                                       | 150 | 160 | 170 | 180 | 190 | 200 |  |
|          | Identity                   |                                                                           |     |     |     |     |     |     |  |
|          | 1. Drosophila melanogaster | QDQELHPLLDQQNQEPYPAVHQDQQAHQNQELHHIEGLIRHRESQNPFEHPPQASLENRETLLGRDITNQ    |     |     |     |     |     |     |  |
|          | 2. Anopheles gambiae       |                                                                           |     |     |     |     |     |     |  |
|          | 3. Danio rerio             |                                                                           |     |     |     |     |     |     |  |
|          | 4. Gallus gallus           |                                                                           |     |     |     |     |     |     |  |
|          | 5. Canis lupus             |                                                                           |     |     |     |     |     |     |  |
|          | 6. Bos taurus              |                                                                           |     |     |     |     |     |     |  |
|          | 7. Macaca mulatta          |                                                                           |     |     |     |     |     |     |  |
|          | 8. Rattus norvegicus       |                                                                           |     |     |     |     |     |     |  |
|          | 9. Mus musculus            |                                                                           |     |     |     |     |     |     |  |
|          | 10. Homo sapiens           |                                                                           |     |     |     |     |     |     |  |
|          | Consensus                  | 210                                                                       | 220 | 230 | 240 | 250 | 260 | 270 |  |
|          | Identity                   |                                                                           |     |     |     |     |     |     |  |
|          | 1. Drosophila melanogaster | EPDEFQVRDPEITPEAEPPPPPLLLLEDLDEQDSGSQDLNBOQPPLIIDANATAETIDANAMERIDDDYED   |     |     |     |     |     |     |  |
|          | 2. Anopheles gambiae       |                                                                           |     |     |     |     |     |     |  |
|          | 3. Danio rerio             |                                                                           |     |     |     |     |     |     |  |
|          | 4. Gallus gallus           |                                                                           |     |     |     |     |     |     |  |
|          | 5. Canis lupus             |                                                                           |     |     |     |     |     |     |  |
|          | 6. Bos taurus              |                                                                           |     |     |     |     |     |     |  |
|          | 7. Macaca mulatta          |                                                                           |     |     |     |     |     |     |  |
|          | 8. Rattus norvegicus       |                                                                           |     |     |     |     |     |     |  |
|          | 9. Mus musculus            |                                                                           |     |     |     |     |     |     |  |
|          | 10. Homo sapiens           |                                                                           |     |     |     |     |     |     |  |
|          | Consensus                  | 280                                                                       | 290 | 300 | 310 | 320 | 330 | 340 |  |
|          | Identity                   |                                                                           |     |     |     |     |     |     |  |
|          | 1. Drosophila melanogaster | DDEFVDEEEVVDREVDRAGEVAVSMSGQRLHSMVAVLPYRSSASRAPRSSNNNNNNNISNNNNNNNSN      |     |     |     |     |     |     |  |
|          | 2. Anopheles gambiae       |                                                                           |     |     |     |     |     |     |  |
|          | 3. Danio rerio             |                                                                           |     |     |     |     |     |     |  |
|          | 4. Gallus gallus           |                                                                           |     |     |     |     |     |     |  |
|          | 5. Canis lupus             |                                                                           |     |     |     |     |     |     |  |
|          | 6. Bos taurus              |                                                                           |     |     |     |     |     |     |  |
|          | 7. Macaca mulatta          |                                                                           |     |     |     |     |     |     |  |
|          | 8. Rattus norvegicus       |                                                                           |     |     |     |     |     |     |  |
|          | 9. Mus musculus            |                                                                           |     |     |     |     |     |     |  |
|          | 10. Homo sapiens           |                                                                           |     |     |     |     |     |     |  |
|          | Consensus                  | 350                                                                       | 360 | 370 | 380 | 390 | 400 |     |  |
|          | Identity                   |                                                                           |     |     |     |     |     |     |  |
|          | 1. Drosophila melanogaster | SNSLSRRTRHFYSNNGSHFSDNMFPSHNPRSSSTQSSPRVGGRRHHSTPAAS                      |     |     |     |     |     |     |  |
|          | 2. Anopheles gambiae       |                                                                           |     |     |     |     |     |     |  |
|          | 3. Danio rerio             |                                                                           |     |     |     |     |     |     |  |
|          | 4. Gallus gallus           |                                                                           |     |     |     |     |     |     |  |
|          | 5. Canis lupus             |                                                                           |     |     |     |     |     |     |  |
|          | 6. Bos taurus              |                                                                           |     |     |     |     |     |     |  |
|          | 7. Macaca mulatta          |                                                                           |     |     |     |     |     |     |  |
|          | 8. Rattus norvegicus       |                                                                           |     |     |     |     |     |     |  |
|          | 9. Mus musculus            |                                                                           |     |     |     |     |     |     |  |
|          | 10. Homo sapiens           |                                                                           |     |     |     |     |     |     |  |
|          | Consensus                  | 410                                                                       | 420 | 430 | 440 | 450 | 460 |     |  |
|          | Identity                   |                                                                           |     |     |     |     |     |     |  |
|          | 1. Drosophila melanogaster | NSPO                                                                      |     |     |     |     |     |     |  |
|          | 2. Anopheles gambiae       |                                                                           |     |     |     |     |     |     |  |
|          | 3. Danio rerio             |                                                                           |     |     |     |     |     |     |  |
|          | 4. Gallus gallus           |                                                                           |     |     |     |     |     |     |  |
|          | 5. Canis lupus             |                                                                           |     |     |     |     |     |     |  |
|          | 6. Bos taurus              |                                                                           |     |     |     |     |     |     |  |
|          | 7. Macaca mulatta          |                                                                           |     |     |     |     |     |     |  |
|          | 8. Rattus norvegicus       |                                                                           |     |     |     |     |     |     |  |
|          | 9. Mus musculus            |                                                                           |     |     |     |     |     |     |  |
|          | 10. Homo sapiens           |                                                                           |     |     |     |     |     |     |  |
|          | Consensus                  | 480                                                                       | 490 | 500 | 510 | 520 | 530 | 540 |  |
|          | Identity                   |                                                                           |     |     |     |     |     |     |  |
|          | 1. Drosophila melanogaster | GDPAAAAARAAGFHLRVGWIFVFTLIPQSGYFVKLSDTYTKSILLDLGHGKTPKDAASVRATHPIPA       |     |     |     |     |     |     |  |
|          | 2. Anopheles gambiae       |                                                                           |     |     |     |     |     |     |  |
|          | 3. Danio rerio             |                                                                           |     |     |     |     |     |     |  |
|          | 4. Gallus gallus           |                                                                           |     |     |     |     |     |     |  |
|          | 5. Canis lupus             |                                                                           |     |     |     |     |     |     |  |
|          | 6. Bos taurus              |                                                                           |     |     |     |     |     |     |  |
|          | 7. Macaca mulatta          |                                                                           |     |     |     |     |     |     |  |
|          | 8. Rattus norvegicus       |                                                                           |     |     |     |     |     |     |  |
|          | 9. Mus musculus            |                                                                           |     |     |     |     |     |     |  |
|          | 10. Homo sapiens           |                                                                           |     |     |     |     |     |     |  |
|          | Consensus                  | 550                                                                       | 560 | 570 | 580 | 590 | 600 | 610 |  |
|          | Identity                   |                                                                           |     |     |     |     |     |     |  |
|          | 1. Drosophila melanogaster | SCGLIYFVVKIVSKGRDGYMGIGLSAQGVNMNRLPGWDKHSYGYHGGDDGHSFCSSGTQPYGPTFTTTG     |     |     |     |     |     |     |  |
|          | 2. Anopheles gambiae       |                                                                           |     |     |     |     |     |     |  |
|          | 3. Danio rerio             |                                                                           |     |     |     |     |     |     |  |
|          | 4. Gallus gallus           |                                                                           |     |     |     |     |     |     |  |
|          | 5. Canis lupus             |                                                                           |     |     |     |     |     |     |  |
|          | 6. Bos taurus              |                                                                           |     |     |     |     |     |     |  |
|          | 7. Macaca mulatta          |                                                                           |     |     |     |     |     |     |  |
|          | 8. Rattus norvegicus       |                                                                           |     |     |     |     |     |     |  |
|          | 9. Mus musculus            |                                                                           |     |     |     |     |     |     |  |
|          | 10. Homo sapiens           |                                                                           |     |     |     |     |     |     |  |
|          | Consensus                  | 620                                                                       | 630 | 640 | 650 | 660 | 670 | 680 |  |
|          | Identity                   |                                                                           |     |     |     |     |     |     |  |
|          | 1. Drosophila melanogaster | DVIGCCVNLINNTCFYTKNGHSLGIAFTDLPPNLYPTVGLQTPGEVVDANFGQHPFVFD               |     |     |     |     |     |     |  |
|          | 2. Anopheles gambiae       |                                                                           |     |     |     |     |     |     |  |
|          | 3. Danio rerio             |                                                                           |     |     |     |     |     |     |  |

|                                   |                                                                          |                                                                         |       |       |       |       |       |    |  |
|-----------------------------------|--------------------------------------------------------------------------|-------------------------------------------------------------------------|-------|-------|-------|-------|-------|----|--|
| table S1                          | Consensus                                                                | 1                                                                       | 10    | 20    | 30    | 40    | 50    | 60 |  |
|                                   | Identity                                                                 | MENVEEAPPLISSSSNSNSNNSSAS                                               |       |       |       |       |       |    |  |
|                                   | 1. <i>Drosophila melanogaster</i>                                        | MENVEEAPPLISSSSNSNSNNSSASSSSSSHQLSQSGAMGAGTAPSTSRSHSHSPTPSPVPASSHSDQPHF |       |       |       |       |       |    |  |
|                                   | 2. <i>Anopheles gambiae</i>                                              | MENVEEAPPLISSSSNSNSNNSSASSSSSSHQLSQSGAMGAGTAPSTSRSHSHSPTPSPVPASSHSDQPHF |       |       |       |       |       |    |  |
|                                   | 3. <i>Danio rerio</i>                                                    | MENVEEAPPLISSSSNSNSNNSSASSSSSSHQLSQSGAMGAGTAPSTSRSHSHSPTPSPVPASSHSDQPHF |       |       |       |       |       |    |  |
|                                   | 4. <i>Gallus gallus</i>                                                  | MENVEEAPPLISSSSNSNSNNSSASSSSSSHQLSQSGAMGAGTAPSTSRSHSHSPTPSPVPASSHSDQPHF |       |       |       |       |       |    |  |
|                                   | 5. <i>Canis lupus</i>                                                    | MENVEEAPPLISSSSNSNSNNSSASSSSSSHQLSQSGAMGAGTAPSTSRSHSHSPTPSPVPASSHSDQPHF |       |       |       |       |       |    |  |
|                                   | 6. <i>Bos taurus</i>                                                     | MENVEEAPPLISSSSNSNSNNSSASSSSSSHQLSQSGAMGAGTAPSTSRSHSHSPTPSPVPASSHSDQPHF |       |       |       |       |       |    |  |
|                                   | 7. <i>Macaca mulatta</i>                                                 | MENVEEAPPLISSSSNSNSNNSSASSSSSSHQLSQSGAMGAGTAPSTSRSHSHSPTPSPVPASSHSDQPHF |       |       |       |       |       |    |  |
|                                   | 8. <i>Rattus norvegicus</i>                                              | MENVEEAPPLISSSSNSNSNNSSASSSSSSHQLSQSGAMGAGTAPSTSRSHSHSPTPSPVPASSHSDQPHF |       |       |       |       |       |    |  |
|                                   | 9. <i>Mus musculus</i>                                                   | MENVEEAPPLISSSSNSNSNNSSASSSSSSHQLSQSGAMGAGTAPSTSRSHSHSPTPSPVPASSHSDQPHF |       |       |       |       |       |    |  |
| 10. <i>Homo sapiens</i>           | MENVEEAPPLISSSSNSNSNNSSASSSSSSHQLSQSGAMGAGTAPSTSRSHSHSPTPSPVPASSHSDQPHF  |                                                                         |       |       |       |       |       |    |  |
| Consensus                         | 70                                                                       | 80                                                                      | 90    | 100   | 110   | 120   | 130   |    |  |
| Identity                          | XXXXXXXXXXXXXXXXXXXXXSXXXXXXXXXXXXXXXXXXXXMSQXPXPPQQQQPQP-PPP            |                                                                         |       |       |       |       |       |    |  |
| 1. <i>Drosophila melanogaster</i> | DHPSPPLINASTETARENSPHDHSPTPTTFHOTAPPPTTSSSTAPQORDEREQOQQQQHAPPLOQDQQENS  |                                                                         |       |       |       |       |       |    |  |
| 2. <i>Anopheles gambiae</i>       | DHPSPPLINASTETARENSPHDHSPTPTTFHOTAPPPTTSSSTAPQORDEREQOQQQQHAPPLOQDQQENS  |                                                                         |       |       |       |       |       |    |  |
| 3. <i>Danio rerio</i>             | DHPSPPLINASTETARENSPHDHSPTPTTFHOTAPPPTTSSSTAPQORDEREQOQQQQHAPPLOQDQQENS  |                                                                         |       |       |       |       |       |    |  |
| 4. <i>Gallus gallus</i>           | DHPSPPLINASTETARENSPHDHSPTPTTFHOTAPPPTTSSSTAPQORDEREQOQQQQHAPPLOQDQQENS  |                                                                         |       |       |       |       |       |    |  |
| 5. <i>Canis lupus</i>             | DHPSPPLINASTETARENSPHDHSPTPTTFHOTAPPPTTSSSTAPQORDEREQOQQQQHAPPLOQDQQENS  |                                                                         |       |       |       |       |       |    |  |
| 6. <i>Bos taurus</i>              | DHPSPPLINASTETARENSPHDHSPTPTTFHOTAPPPTTSSSTAPQORDEREQOQQQQHAPPLOQDQQENS  |                                                                         |       |       |       |       |       |    |  |
| 7. <i>Macaca mulatta</i>          | DHPSPPLINASTETARENSPHDHSPTPTTFHOTAPPPTTSSSTAPQORDEREQOQQQQHAPPLOQDQQENS  |                                                                         |       |       |       |       |       |    |  |
| 8. <i>Rattus norvegicus</i>       | DHPSPPLINASTETARENSPHDHSPTPTTFHOTAPPPTTSSSTAPQORDEREQOQQQQHAPPLOQDQQENS  |                                                                         |       |       |       |       |       |    |  |
| 9. <i>Mus musculus</i>            | DHPSPPLINASTETARENSPHDHSPTPTTFHOTAPPPTTSSSTAPQORDEREQOQQQQHAPPLOQDQQENS  |                                                                         |       |       |       |       |       |    |  |
| 10. <i>Homo sapiens</i>           | DHPSPPLINASTETARENSPHDHSPTPTTFHOTAPPPTTSSSTAPQORDEREQOQQQQHAPPLOQDQQENS  |                                                                         |       |       |       |       |       |    |  |
| Consensus                         | 140                                                                      | 150                                                                     | 160   | 170   | 180   | 190   | 200   |    |  |
| Identity                          | PPAXXXPLSGXXXPXXXAVXXGXXPXXPGX                                           |                                                                         |       |       |       |       |       |    |  |
| 1. <i>Drosophila melanogaster</i> | QDQELHPLLDQQNQEPYPAVHQDQQAHQNQELHHIEGLIRHRESQNPFEHPPQASLENRETLLGRDITNQ   |                                                                         |       |       |       |       |       |    |  |
| 2. <i>Anopheles gambiae</i>       | QDQELHPLLDQQNQEPYPAVHQDQQAHQNQELHHIEGLIRHRESQNPFEHPPQASLENRETLLGRDITNQ   |                                                                         |       |       |       |       |       |    |  |
| 3. <i>Danio rerio</i>             | QDQELHPLLDQQNQEPYPAVHQDQQAHQNQELHHIEGLIRHRESQNPFEHPPQASLENRETLLGRDITNQ   |                                                                         |       |       |       |       |       |    |  |
| 4. <i>Gallus gallus</i>           | QDQELHPLLDQQNQEPYPAVHQDQQAHQNQELHHIEGLIRHRESQNPFEHPPQASLENRETLLGRDITNQ   |                                                                         |       |       |       |       |       |    |  |
| 5. <i>Canis lupus</i>             | QDQELHPLLDQQNQEPYPAVHQDQQAHQNQELHHIEGLIRHRESQNPFEHPPQASLENRETLLGRDITNQ   |                                                                         |       |       |       |       |       |    |  |
| 6. <i>Bos taurus</i>              | QDQELHPLLDQQNQEPYPAVHQDQQAHQNQELHHIEGLIRHRESQNPFEHPPQASLENRETLLGRDITNQ   |                                                                         |       |       |       |       |       |    |  |
| 7. <i>Macaca mulatta</i>          | QDQELHPLLDQQNQEPYPAVHQDQQAHQNQELHHIEGLIRHRESQNPFEHPPQASLENRETLLGRDITNQ   |                                                                         |       |       |       |       |       |    |  |
| 8. <i>Rattus norvegicus</i>       | QDQELHPLLDQQNQEPYPAVHQDQQAHQNQELHHIEGLIRHRESQNPFEHPPQASLENRETLLGRDITNQ   |                                                                         |       |       |       |       |       |    |  |
| 9. <i>Mus musculus</i>            | QDQELHPLLDQQNQEPYPAVHQDQQAHQNQELHHIEGLIRHRESQNPFEHPPQASLENRETLLGRDITNQ   |                                                                         |       |       |       |       |       |    |  |
| 10. <i>Homo sapiens</i>           | QDQELHPLLDQQNQEPYPAVHQDQQAHQNQELHHIEGLIRHRESQNPFEHPPQASLENRETLLGRDITNQ   |                                                                         |       |       |       |       |       |    |  |
| Consensus                         | 210                                                                      | 220                                                                     | 230   | 240   | 250   | 260   | 270   |    |  |
| Identity                          | GLXXXXAXXXRXPPPPPP-X-XXPP                                                |                                                                         |       |       |       |       |       |    |  |
| 1. <i>Drosophila melanogaster</i> | EPDEFQVRDPEITPEAEPPPPPLLLLEDLDEQDSGSDQLNBOQPPPLIIDANATAETIDANAMERIDDDYED |                                                                         |       |       |       |       |       |    |  |
| 2. <i>Anopheles gambiae</i>       | EPDEFQVRDPEITPEAEPPPPPLLLLEDLDEQDSGSDQLNBOQPPPLIIDANATAETIDANAMERIDDDYED |                                                                         |       |       |       |       |       |    |  |
| 3. <i>Danio rerio</i>             | EPDEFQVRDPEITPEAEPPPPPLLLLEDLDEQDSGSDQLNBOQPPPLIIDANATAETIDANAMERIDDDYED |                                                                         |       |       |       |       |       |    |  |
| 4. <i>Gallus gallus</i>           | EPDEFQVRDPEITPEAEPPPPPLLLLEDLDEQDSGSDQLNBOQPPPLIIDANATAETIDANAMERIDDDYED |                                                                         |       |       |       |       |       |    |  |
| 5. <i>Canis lupus</i>             | EPDEFQVRDPEITPEAEPPPPPLLLLEDLDEQDSGSDQLNBOQPPPLIIDANATAETIDANAMERIDDDYED |                                                                         |       |       |       |       |       |    |  |
| 6. <i>Bos taurus</i>              | EPDEFQVRDPEITPEAEPPPPPLLLLEDLDEQDSGSDQLNBOQPPPLIIDANATAETIDANAMERIDDDYED |                                                                         |       |       |       |       |       |    |  |
| 7. <i>Macaca mulatta</i>          | EPDEFQVRDPEITPEAEPPPPPLLLLEDLDEQDSGSDQLNBOQPPPLIIDANATAETIDANAMERIDDDYED |                                                                         |       |       |       |       |       |    |  |
| 8. <i>Rattus norvegicus</i>       | EPDEFQVRDPEITPEAEPPPPPLLLLEDLDEQDSGSDQLNBOQPPPLIIDANATAETIDANAMERIDDDYED |                                                                         |       |       |       |       |       |    |  |
| 9. <i>Mus musculus</i>            | EPDEFQVRDPEITPEAEPPPPPLLLLEDLDEQDSGSDQLNBOQPPPLIIDANATAETIDANAMERIDDDYED |                                                                         |       |       |       |       |       |    |  |
| 10. <i>Homo sapiens</i>           | EPDEFQVRDPEITPEAEPPPPPLLLLEDLDEQDSGSDQLNBOQPPPLIIDANATAETIDANAMERIDDDYED |                                                                         |       |       |       |       |       |    |  |
| Consensus                         | 280                                                                      | 290                                                                     | 300   | 310   | 320   | 330   | 340   |    |  |
| Identity                          | APXP-PPPPAS-AAAAAX-APP                                                   |                                                                         |       |       |       |       |       |    |  |
| 1. <i>Drosophila melanogaster</i> | DDEFVDEEEVVDREVDRAGEVAVSMSGQRLHSMVAVLPYRSSASRAPRSSNNNNNNNISNNNNNNNNNS    |                                                                         |       |       |       |       |       |    |  |
| 2. <i>Anopheles gambiae</i>       | DDEFVDEEEVVDREVDRAGEVAVSMSGQRLHSMVAVLPYRSSASRAPRSSNNNNNNNISNNNNNNNNNS    |                                                                         |       |       |       |       |       |    |  |
| 3. <i>Danio rerio</i>             | DDEFVDEEEVVDREVDRAGEVAVSMSGQRLHSMVAVLPYRSSASRAPRSSNNNNNNNISNNNNNNNNNS    |                                                                         |       |       |       |       |       |    |  |
| 4. <i>Gallus gallus</i>           | DDEFVDEEEVVDREVDRAGEVAVSMSGQRLHSMVAVLPYRSSASRAPRSSNNNNNNNISNNNNNNNNNS    |                                                                         |       |       |       |       |       |    |  |
| 5. <i>Canis lupus</i>             | DDEFVDEEEVVDREVDRAGEVAVSMSGQRLHSMVAVLPYRSSASRAPRSSNNNNNNNISNNNNNNNNNS    |                                                                         |       |       |       |       |       |    |  |
| 6. <i>Bos taurus</i>              | DDEFVDEEEVVDREVDRAGEVAVSMSGQRLHSMVAVLPYRSSASRAPRSSNNNNNNNISNNNNNNNNNS    |                                                                         |       |       |       |       |       |    |  |
| 7. <i>Macaca mulatta</i>          | DDEFVDEEEVVDREVDRAGEVAVSMSGQRLHSMVAVLPYRSSASRAPRSSNNNNNNNISNNNNNNNNNS    |                                                                         |       |       |       |       |       |    |  |
| 8. <i>Rattus norvegicus</i>       | DDEFVDEEEVVDREVDRAGEVAVSMSGQRLHSMVAVLPYRSSASRAPRSSNNNNNNNISNNNNNNNNNS    |                                                                         |       |       |       |       |       |    |  |
| 9. <i>Mus musculus</i>            | DDEFVDEEEVVDREVDRAGEVAVSMSGQRLHSMVAVLPYRSSASRAPRSSNNNNNNNISNNNNNNNNNS    |                                                                         |       |       |       |       |       |    |  |
| 10. <i>Homo sapiens</i>           | DDEFVDEEEVVDREVDRAGEVAVSMSGQRLHSMVAVLPYRSSASRAPRSSNNNNNNNISNNNNNNNNNS    |                                                                         |       |       |       |       |       |    |  |
| Consensus                         | 350                                                                      | 360                                                                     | 370   | 380   | 390   | 400   |       |    |  |
| Identity                          | GLXXGPGX-AGGAP-P-LXAGSSAAAPFPHGDSALN                                     |                                                                         |       |       |       |       |       |    |  |
| 1. <i>Drosophila melanogaster</i> | SNSLSRRTTRHFYSNNGSHFSDNMFPSHNPRSSSTQSSPRVGGRRHHSTPAAS                    |                                                                         |       |       |       |       |       |    |  |
| 2. <i>Anopheles gambiae</i>       | SNSLSRRTTRHFYSNNGSHFSDNMFPSHNPRSSSTQSSPRVGGRRHHSTPAAS                    |                                                                         |       |       |       |       |       |    |  |
| 3. <i>Danio rerio</i>             | SNSLSRRTTRHFYSNNGSHFSDNMFPSHNPRSSSTQSSPRVGGRRHHSTPAAS                    |                                                                         |       |       |       |       |       |    |  |
| 4. <i>Gallus gallus</i>           | SNSLSRRTTRHFYSNNGSHFSDNMFPSHNPRSSSTQSSPRVGGRRHHSTPAAS                    |                                                                         |       |       |       |       |       |    |  |
| 5. <i>Canis lupus</i>             | SNSLSRRTTRHFYSNNGSHFSDNMFPSHNPRSSSTQSSPRVGGRRHHSTPAAS                    |                                                                         |       |       |       |       |       |    |  |
| 6. <i>Bos taurus</i>              | SNSLSRRTTRHFYSNNGSHFSDNMFPSHNPRSSSTQSSPRVGGRRHHSTPAAS                    |                                                                         |       |       |       |       |       |    |  |
| 7. <i>Macaca mulatta</i>          | SNSLSRRTTRHFYSNNGSHFSDNMFPSHNPRSSSTQSSPRVGGRRHHSTPAAS                    |                                                                         |       |       |       |       |       |    |  |
| 8. <i>Rattus norvegicus</i>       | SNSLSRRTTRHFYSNNGSHFSDNMFPSHNPRSSSTQSSPRVGGRRHHSTPAAS                    |                                                                         |       |       |       |       |       |    |  |
| 9. <i>Mus musculus</i>            | SNSLSRRTTRHFYSNNGSHFSDNMFPSHNPRSSSTQSSPRVGGRRHHSTPAAS                    |                                                                         |       |       |       |       |       |    |  |
| 10. <i>Homo sapiens</i>           | SNSLSRRTTRHFYSNNGSHFSDNMFPSHNPRSSSTQSSPRVGGRRHHSTPAAS                    |                                                                         |       |       |       |       |       |    |  |
| Consensus                         | 410                                                                      | 420                                                                     | 430   | 440   | 450   | 460   |       |    |  |
| Identity                          | LQRRILKRLYPVDEQHTPLPR-SWSPKDK                                            |                                                                         |       |       |       |       |       |    |  |
| 1. <i>Drosophila melanogaster</i> | NSPO-HQGVDPRLLYPNVNSHTPLPR-CWSPHDK                                       |                                                                         |       |       |       |       |       |    |  |
| 2. <i>Anopheles gambiae</i>       | NSPO-HQGVDPRLLYPNVNSHTPLPR-CWSPHDK                                       |                                                                         |       |       |       |       |       |    |  |
| 3. <i>Danio rerio</i>             | NSPO-HQGVDPRLLYPNVNSHTPLPR-CWSPHDK                                       |                                                                         |       |       |       |       |       |    |  |
| 4. <i>Gallus gallus</i>           | NSPO-HQGVDPRLLYPNVNSHTPLPR-CWSPHDK                                       |                                                                         |       |       |       |       |       |    |  |
| 5. <i>Canis lupus</i>             | NSPO-HQGVDPRLLYPNVNSHTPLPR-CWSPHDK                                       |                                                                         |       |       |       |       |       |    |  |
| 6. <i>Bos taurus</i>              | NSPO-HQGVDPRLLYPNVNSHTPLPR-CWSPHDK                                       |                                                                         |       |       |       |       |       |    |  |
| 7. <i>Macaca mulatta</i>          | NSPO-HQGVDPRLLYPNVNSHTPLPR-CWSPHDK                                       |                                                                         |       |       |       |       |       |    |  |
| 8. <i>Rattus norvegicus</i>       | NSPO-HQGVDPRLLYPNVNSHTPLPR-CWSPHDK                                       |                                                                         |       |       |       |       |       |    |  |
| 9. <i>Mus musculus</i>            | NSPO-HQGVDPRLLYPNVNSHTPLPR-CWSPHDK                                       |                                                                         |       |       |       |       |       |    |  |
| 10. <i>Homo sapiens</i>           | NSPO-HQGVDPRLLYPNVNSHTPLPR-CWSPHDK                                       |                                                                         |       |       |       |       |       |    |  |
| Consensus                         | 480                                                                      | 490                                                                     | 500   | 510   | 520   | 530   | 540   |    |  |
| Identity                          | FSYIGLSONNIRVHYK-GHGKTPKDAASVRATHPIPA                                    |                                                                         |       |       |       |       |       |    |  |
| 1. <i>Drosophila melanogaster</i> | CLSIGLSONNIRVHYK-GVGKQHSDDAASVRTAYPIPS                                   |                                                                         |       |       |       |       |       |    |  |
| 2. <i>Anopheles gambiae</i>       | CLSIGLSONNIRVHYK-GVGKQHSDDAASVRTAYPIPS                                   |                                                                         |       |       |       |       |       |    |  |
| 3. <i>Danio rerio</i>             | CLSIGLSONNIRVHYK-GVGKQHSDDAASVRTAYPIPS                                   |                                                                         |       |       |       |       |       |    |  |
| 4. <i>Gallus gallus</i>           | CLSIGLSONNIRVHYK-GVGKQHSDDAASVRTAYPIPS                                   |                                                                         |       |       |       |       |       |    |  |
| 5. <i>Canis lupus</i>             | CLSIGLSONNIRVHYK-GVGKQHSDDAASVRTAYPIPS                                   |                                                                         |       |       |       |       |       |    |  |
| 6. <i>Bos taurus</i>              | CLSIGLSONNIRVHYK-GVGKQHSDDAASVRTAYPIPS                                   |                                                                         |       |       |       |       |       |    |  |
| 7. <i>Macaca mulatta</i>          | CLSIGLSONNIRVHYK-GVGKQHSDDAASVRTAYPIPS                                   |                                                                         |       |       |       |       |       |    |  |
| 8. <i>Rattus norvegicus</i>       | CLSIGLSONNIRVHYK-GVGKQHSDDAASVRTAYPIPS                                   |                                                                         |       |       |       |       |       |    |  |
| 9. <i>Mus musculus</i>            | CLSIGLSONNIRVHYK-GVGKQHSDDAASVRTAYPIPS                                   |                                                                         |       |       |       |       |       |    |  |
| 10. <i>Homo sapiens</i>           | CLSIGLSONNIRVHYK-GVGKQHSDDAASVRTAYPIPS                                   |                                                                         |       |       |       |       |       |    |  |
| Consensus                         | 550                                                                      | 560                                                                     | 570   | 580   | 590   | 600   | 610   |    |  |
| Identity                          | ACGIYYFVKIVSKGRDGYMGIGLSAQGVNMNRLPGWDKHSYGYHGGDDGHSFCSSGTQPYGPTFTTG      |                                                                         |       |       |       |       |       |    |  |
| 1. <i>Drosophila melanogaster</i> | SCGIYYFVKIVSKGRDGYMGIGLITAQQFRMNRILPGWDKQSYGYHGGDDGHSFSSSGNGQTYGPTFTTTG  |                                                                         |       |       |       |       |       |    |  |
| 2. <i>Anopheles gambiae</i>       | SCGIYYFVKIVSKGRDGYMGIGLITAQQFRMNRILPGWDKQSYGYHGGDDGHSFSSSGNGQTYGPTFTTTG  |                                                                         |       |       |       |       |       |    |  |
| 3. <i>Danio rerio</i>             | SCGIYYFVKIVSKGRDGYMGIGLITAQQFRMNRILPGWDKQSYGYHGGDDGHSFSSSGNGQTYGPTFTTTG  |                                                                         |       |       |       |       |       |    |  |
| 4. <i>Gallus gallus</i>           | SCGIYYFVKIVSKGRDGYMGIGLITAQQFRMNRILPGWDKQSYGYHGGDDGHSFSSSGNGQTYGPTFTTTG  |                                                                         |       |       |       |       |       |    |  |
| 5. <i>Canis lupus</i>             | SCGIYYFVKIVSKGRDGYMGIGLITAQQFRMNRILPGWDKQSYGYHGGDDGHSFSSSGNGQTYGPTFTTTG  |                                                                         |       |       |       |       |       |    |  |
| 6. <i>Bos taurus</i>              | SCGIYYFVKIVSKGRDGYMGIGLITAQQFRMNRILPGWDKQSYGYHGGDDGHSFSSSGNGQTYGPTFTTTG  |                                                                         |       |       |       |       |       |    |  |
| 7. <i>Macaca mulatta</i>          | SCGIYYFVKIVSKGRDGYMGIGLITAQQFRMNRILPGWDKQSYGYHGGDDGHSFSSSGNGQTYGPTFTTTG  |                                                                         |       |       |       |       |       |    |  |
| 8. <i>Rattus norvegicus</i>       | SCGIYYFVKIVSKGRDGYMGIGLITAQQFRMNRILPGWDKQSYGYHGGDDGHSFSSSGNGQTYGPTFTTTG  |                                                                         |       |       |       |       |       |    |  |
| 9. <i>Mus musculus</i>            | SCGIYYFVKIVSKGRDGYMGIGLITAQQFRMNRILPGWDKQSYGYHGGDDGHSFSSSGNGQTYGPTFTTTG  |                                                                         |       |       |       |       |       |    |  |
| 10. <i>Homo sapiens</i>           | SCGIYYFVKIVSKGRDGYMGIGLITAQQFRMNRILPGWDKQSYGYHGGDDGHSFSSSGNGQTYGPTFTTTG  |                                                                         |       |       |       |       |       |    |  |
| Consensus                         | 620                                                                      | 630                                                                     | 640   | 650   | 660   | 670   | 680   |    |  |
| Identity                          | DVIGCCVNLINNTCFYTKNGHSLGIAFTDLPPNLYPTVGLQTPGEVVDANFGQHPFVFD-IEDYMRBW     |                                                                         |       |       |       |       |       |    |  |
| 1. <i>Drosophila melanogaster</i> | DVIGCCVNLINNTCFYTKNGHSLGIAFTDLPPNLYPTVGLQTPGEVVDANFGQHPFVFD-IEDYMRBW     |                                                                         |       |       |       |       |       |    |  |
| 2. <i>Anopheles gambiae</i>       | DVIGCCVNLINNTCFYTKNGHSLGIAFTDLPPNLYPTVGLQTPGEVVDANFGQHPFVFD-IEDYMRBW     |                                                                         |       |       |       |       |       |    |  |
| 3. <i>Danio rerio</i>             | DVIGCCVNLINNTCFYTKNGHSLGIAFTDLPPNLYPTVGLQTPGEVVDANFGQHPFVFD-IEDYMRBW     |                                                                         |       |       |       |       |       |    |  |
| 4. <i>Gallus gallus</i>           | DVIGCCVNLINNTCFYTKNGHSLGIAFTDLPPNLYPTVGLQTPGEVVDANFGQHPFVFD-IEDYMRBW     |                                                                         |       |       |       |       |       |    |  |
| 5. <i>Canis lupus</i>             | DVIGCCVNLINNTCFYTKNGHSLGIAFTDLPPNLYPTVGLQTPGEVVDANFGQHPFVFD-IEDYMRBW     |                                                                         |       |       |       |       |       |    |  |
| 6. <i>Bos taurus</i>              | DVIGCCVNLINNTCFYTKNGHSLGIAFTDLPPNLYPTVGLQTPGEVVDANFGQHPFVFD-IEDYMRBW     |                                                                         |       |       |       |       |       |    |  |
| 7. <i>Macaca mulatta</i>          | DVIGCCVNLINNTCFYTKNGHSLGIAFTDLPPNLYPTVGLQTPGEVVDANFGQHPFVFD-IEDYMRBW     |                                                                         |       |       |       |       |       |    |  |
| 8. <i>Rattus norvegicus</i>       | DVIGCCVNLINNTCFYTKNGHSLGIAFTDLPPNLYPTVGLQTPGEVVDANFGQHPFVFD-IEDYMRBW     |                                                                         |       |       |       |       |       |    |  |
| 9. <i>Mus musculus</i>            | DVIGCCVNLINNTCFYTKNGHSLGIAFTDLPPNLYPTVGLQTPGEVVDANFGQHPFVFD-IEDYMRBW     |                                                                         |       |       |       |       |       |    |  |
| 10. <i>Homo sapiens</i>           | DVIGCCVNLINNTCFYTKNGHSLGIAFTDLPPNLYPTVGLQTPGEVVDANFGQHPFVFD-IEDYMRBW     |                                                                         |       |       |       |       |       |    |  |
| Consensus                         | 690                                                                      | 700                                                                     | 710   | 720   | 730   | 740   |       |    |  |
| Identity                          | RTKIQAQIDRFPIGDRGEFWQTMIQKMVSSYLVHHGYCATAEAFARSTDQTVLEBLASIKNRQRIQKI     |                                                                         |       |       |       |       |       |    |  |
| 1. <i>Drosophila melanogaster</i> | RSNVLRLKIDRYPHLLETPE- -LMNRLVSTYLVHNAFASKTAEAFNGYTNQTFNEDLASIKTROKILIKI  |                                                                         |       |       |       |       |       |    |  |
| 2. <i>Anopheles gambiae</i>       | RSNVLRLKIDRYPHLLETPE- -LMNRLVSTYLVHNAFASKTAEAFNGYTNQTFNEDLASIKTROKILIKI  |                                                                         |       |       |       |       |       |    |  |
| 3. <i>Danio rerio</i>             | RSNVLRLKIDRYPHLLETPE- -LMNRLVSTYLVHNAFASKTAEAFNGYTNQTFNEDLASIKTROKILIKI  |                                                                         |       |       |       |       |       |    |  |
| 4. <i>Gallus gallus</i>           | RSNVLRLKIDRYPHLLETPE- -LMNRLVSTYLVHNAFASKTAEAFNGYTNQTFNEDLASIKTROKILIKI  |                                                                         |       |       |       |       |       |    |  |
| 5. <i>Canis lupus</i>             | RSNVLRLKIDRYPHLLETPE- -LMNRLVSTYLVHNAFASKTAEAFNGYTNQTFNEDLASIKTROKILIKI  |                                                                         |       |       |       |       |       |    |  |
| 6. <i>Bos taurus</i>              | RSNVLRLKIDRYPHLLETPE- -LMNRLVSTYLVHNAFASKTAEAFNGYTNQTFNEDLASIKTROKILIKI  |                                                                         |       |       |       |       |       |    |  |
| 7. <i>Macaca mulatta</i>          | RSNVLRLKIDRYPHLLETPE- -LMNRLVSTYLVHNAFASKTAEAFNGYTNQTFNEDLASIKTROKILIKI  |                                                                         |       |       |       |       |       |    |  |
| 8. <i>Rattus norvegicus</i>       | RSNVLRLKIDRYPHLLETPE- -LMNRLVSTYLVHNAFASKTAEAFNGYTNQTFNEDLASIKTROKILIKI  |                                                                         |       |       |       |       |       |    |  |
| 9. <i>Mus musculus</i>            | RSNVLRLKIDRYPHLLETPE- -LMNRLVSTYLVHNAFASKTAEAFNGYTNQTFNEDLASIKTROKILIKI  |                                                                         |       |       |       |       |       |    |  |
| 10. <i>Homo sapiens</i>           | RSNVLRLKIDRYPHLLETPE- -LMNRLVSTYLVHNAFASKTAEAFNGYTNQTFNEDLASIKTROKILIKI  |                                                                         |       |       |       |       |       |    |  |
| Consensus                         | 750                                                                      | 760                                                                     | 770   | 780   | 790   | 800   | 810   |    |  |
| Identity                          | VLGRMGBAITTTQQLYPSLLERNPDLFTLKKVRFIMVNGTDSEVRCLGGRSPKSDSYSPVSPRPF        |                                                                         |       |       |       |       |       |    |  |
| 1. <i>Drosophila melanogaster</i> | VLGRMGBAITTTQQLYPSLLERNPDLFTLKKVRFIMVNGTDSEVRCLGGRSPKSDSYSPVSPRPF        |                                                                         |       |       |       |       |       |    |  |
| 2. <i>Anopheles gambiae</i>       | VLGRMGBAITTTQQLYPSLLERNPDLFTLKKVRFIMVNGTDSEVRCLGGRSPKSDSYSPVSPRPF        |                                                                         |       |       |       |       |       |    |  |
| 3. <i>Danio rerio</i>             | VLGRMGBAITTTQQLYPSLLERNPDLFTLKKVRFIMVNGTDSEVRCLGGRSPKSDSYSPVSPRPF        |                                                                         |       |       |       |       |       |    |  |
| 4. <i>Gallus gallus</i>           | VLGRMGBAITTTQQLYPSLLERNPDLFTLKKVRFIMVNGTDSEVRCLGGRSPKSDSYSPVSPRPF        |                                                                         |       |       |       |       |       |    |  |
| 5. <i>Canis lupus</i>             | VLGRMGBAITTTQQLYPSLLERNPDLFTLKKVRFIMVNGTDSEVRCLGGRSPKSDSYSPVSPRPF        |                                                                         |       |       |       |       |       |    |  |
| 6. <i>Bos taurus</i>              | VLGRMGBAITTTQQLYPSLLERNPDLFTLKKVRFIMVNGTDSEVRCLGGRSPKSDSYSPVSPRPF        |                                                                         |       |       |       |       |       |    |  |
| 7. <i>Macaca mulatta</i>          | VLGRMGBAITTTQQLYPSLLERNPDLFTLKKVRFIMVNGTDSEVRCLGGRSPKSDSYSPVSPRPF        |                                                                         |       |       |       |       |       |    |  |
| 8. <i>Rattus norvegicus</i>       | VLGRMGBAITTTQQLYPSLLERNPDLFTLKKVRFIMVNGTDSEVRCLGGRSPKSDSYSPVSPRPF        |                                                                         |       |       |       |       |       |    |  |
| 9. <i>Mus musculus</i>            | VLGRMGBAITTTQQLYPSLLERNPDLFTLKKVRFIMVNGTDSEVRCLGGRSPKSDSYSPVSPRPF        |                                                                         |       |       |       |       |       |    |  |
| 10. <i>Homo sapiens</i>           | VLGRMGBAITTTQQLYPSLLERNPDLFTLKKVRFIMVNGTDSEVRCLGGRSPKSDSYSPVSPRPF        |                                                                         |       |       |       |       |       |    |  |
| Consensus                         | 820                                                                      | 830                                                                     | 840   | 850   | 860   | 870   | 880   |    |  |
| Identity                          | SSPSMSPSHGMNIHNLASGKGSTAHFSGFES-CSNGVTSNKAHQSYCHS-KHQSSXNLNVPILNSINXS    |                                                                         |       |       |       |       |       |    |  |
| 1. <i>Drosophila melanogaster</i> | IOSTKTFKHSKS- -GSGNGNVNINQTOQQNNTAIPAMIKPOGGDRP- -DIKNMLVDDNS            |                                                                         |       |       |       |       |       |    |  |
| 2. <i>Anopheles gambiae</i>       | IOSTKTFKHSKS- -GSGNGNVNINQTOQQNNTAIPAMIKPOGGDRP- -DIKNMLVDDNS            |                                                                         |       |       |       |       |       |    |  |
| 3. <i>Danio rerio</i>             | IOSTKTFKHSKS- -GSGNGNVNINQTOQQNNTAIPAMIKPOGGDRP- -DIKNMLVDDNS            |                                                                         |       |       |       |       |       |    |  |
| 4. <i>Gallus gallus</i>           | IOSTKTFKHSKS- -GSGNGNVNINQTOQQNNTAIPAMIKPOGGDRP- -DIKNMLVDDNS            |                                                                         |       |       |       |       |       |    |  |
| 5. <i>Canis lupus</i>             | IOSTKTFKHSKS- -GSGNGNVNINQTOQQNNTAIPAMIKPOGGDRP- -DIKNMLVDDNS            |                                                                         |       |       |       |       |       |    |  |
| 6. <i>Bos taurus</i>              | IOSTKTFKHSKS- -GSGNGNVNINQTOQQNNTAIPAMIKPOGGDRP- -DIKNMLVDDNS            |                                                                         |       |       |       |       |       |    |  |
| 7. <i>Macaca mulatta</i>          | IOSTKTFKHSKS- -GSGNGNVNINQTOQQNNTAIPAMIKPOGGDRP- -DIKNMLVDDNS            |                                                                         |       |       |       |       |       |    |  |
| 8. <i>Rattus norvegicus</i>       | IOSTKTFKHSKS- -GSGNGNVNINQTOQQNNTAIPAMIKPOGGDRP- -DIKNMLVDDNS            |                                                                         |       |       |       |       |       |    |  |
| 9. <i>Mus musculus</i>            | IOSTKTFKHSKS- -GSGNGNVNINQTOQQNNTAIPAMIKPOGGDRP- -DIKNMLVDDNS            |                                                                         |       |       |       |       |       |    |  |
| 10. <i>Homo sapiens</i>           | IOSTKTFKHSKS- -GSGNGNVNINQTOQQNNTAIPAMIKPOGGDRP- -DIKNMLVDDNS            |                                                                         |       |       |       |       |       |    |  |
| Consensus                         | 890                                                                      | 900                                                                     | 910   | 920   | 930   | 940   | 950   |    |  |
| Identity                          | RSQQVNNFTSNDVDMETDHYSNVGVTSSNGFLNGSSKHDHEMEDCDTEMEVDSSQLRRQ              |                                                                         |       |       |       |       |       |    |  |
| 1. <i>Drosophila melanogaster</i> | NKCVEHDSNSMDVEMFPCQSHSNGGDSSSNG- -NASAVRNSLDAIDEEMDVSPSSR                |                                                                         |       |       |       |       |       |    |  |
| 2. <i>Anopheles gambiae</i>       | NKCVEHDSNSMDVEMFPCQSHSNGGDSSSNG- -NASAVRNSLDAIDEEMDVSPSSR                |                                                                         |       |       |       |       |       |    |  |
| 3. <i>Danio rerio</i>             | NKCVEHDSNSMDVEMFPCQSHSNGGDSSSNG- -NASAVRNSLDAIDEEMDVSPSSR                |                                                                         |       |       |       |       |       |    |  |
| 4. <i>Gallus gallus</i>           | NKCVEHDSNSMDVEMFPCQSHSNGGDSSSNG- -NASAVRNSLDAIDEEMDVSPSSR                |                                                                         |       |       |       |       |       |    |  |
| 5. <i>Canis lupus</i>             | NKCVEHDSNSMDVEMFPCQSHSNGGDSSSNG- -NASAVRNSLDAIDEEMDVSPSSR                |                                                                         |       |       |       |       |       |    |  |
| 6. <i>Bos taurus</i>              | NKCVEHDSNSMDVEMFPCQSHSNGGDSSSNG- -NASAVRNSLDAIDEEMDVSPSSR                |                                                                         |       |       |       |       |       |    |  |
| 7. <i>Macaca mulatta</i>          | NKCVEHDSNSMDVEMFPCQSHSNGGDSSSNG- -NASAVRNSLDAIDEEMDVSPSSR                |                                                                         |       |       |       |       |       |    |  |
| 8. <i>Rattus norvegicus</i>       | NKCVEHDSNSMDVEMFPCQSHSNGGDSSSNG- -NASAVRNSLDAIDEEMDVSPSSR                |                                                                         |       |       |       |       |       |    |  |
| 9. <i>Mus musculus</i>            | NKCVEHDSNSMDVEMFPCQSHSNGGDSSSNG- -NASAVRNSLDAIDEEMDVSPSSR                |                                                                         |       |       |       |       |       |    |  |
| 10. <i>Homo sapiens</i>           | NKCVEHDSNSMDVEMFPCQSHSNGGDSSSNG- -NASAVRNSLDAIDEEMDVSPSSR                |                                                                         |       |       |       |       |       |    |  |
| Consensus                         | 960                                                                      | 970                                                                     | 980   | 990   | 1,000 | 1,010 | 1,020 |    |  |
| Identity                          | -LCGGS- -QAAIERMIHFGRRLQAMSEQLRRRCGKNTANKKMLKDAFSLIAYSDPWNSPVGNLDP       |                                                                         |       |       |       |       |       |    |  |
| 1. <i>Drosophila melanogaster</i> | -NCG- -RVIEKILEFGKELISSMGQOLEKENLMTBBERQMLEDAFSLIAYSNPWSSPLGWLICP        |                                                                         |       |       |       |       |       |    |  |
| 2. <i>Anopheles gambiae</i>       | -NCG- -RVIEKILEFGKELISSMGQOLEKENLMTBBERQMLEDAFSLIAYSNPWSSPLGWLICP        |                                                                         |       |       |       |       |       |    |  |
| 3. <i>Danio rerio</i>             | -NCG- -RVIEKILEFGKELISSMGQOLEKENLMTBBERQMLEDAFSLIAYSNPWSSPLGWLICP        |                                                                         |       |       |       |       |       |    |  |
| 4. <i>Gallus gallus</i>           | -NCG- -RVIEKILEFGKELISSMGQOLEKENLMTBBERQMLEDAFSLIAYSNPWSSPLGWLICP        |                                                                         |       |       |       |       |       |    |  |
| 5. <i>Canis lupus</i>             | -NCG- -RVIEKILEFGKELISSMGQOLEKENLMTBBERQMLEDAFSLIAYSNPWSSPLGWLICP        |                                                                         |       |       |       |       |       |    |  |
| 6. <i>Bos taurus</i>              | -NCG- -RVIEKILEFGKELISSMGQOLEKENLMTBBERQMLEDAFSLIAYSNPWSSPLGWLICP        |                                                                         |       |       |       |       |       |    |  |
| 7. <i>Macaca mulatta</i>          | -NCG- -RVIEKILEFGKELISSMGQOLEKENLMTBBERQMLEDAFSLIAYSNPWSSPLGWLICP        |                                                                         |       |       |       |       |       |    |  |
| 8. <i>Rattus norvegicus</i>       | -NCG- -RVIEKILEFGKELISSMGQOLEKENLMTBBERQMLEDAFSLIAYSNPWSSPLGWLICP        |                                                                         |       |       |       |       |       |    |  |
| 9. <i>Mus musculus</i>            | -NCG- -RVIEKILEFGKELISSMGQOLEKENLMTBBERQMLEDAFSLIAYSNPWSSPLGWLICP        |                                                                         |       |       |       |       |       |    |  |
| 10. <i>Homo sapiens</i>           | -NCG- -RVIEKILEFGKELISSMGQOLEKENLMTBBERQMLEDAFSLIAYSNPWSSPLGWLICP        |                                                                         |       |       |       |       |       |    |  |
| Consensus                         | 1,030                                                                    | 1,040                                                                   | 1,050 | 1,060 | 1,070 | 1,080 | 1,083 |    |  |
| Identity                          | TQREPVCSALNSAILETHNLPKQPPLAAMGQATQCLGLMARSIGIGSCAFATVDDYLHQOQH           |                                                                         |       |       |       |       |       |    |  |
| 1. <i>Drosophila melanogaster</i> | SRREAVSTTILNSAILESLNFRPPLLEYLVAHASLILKVLIGQHSLGEDAFITIDDDIFPQN           |                                                                         |       |       |       |       |       |    |  |
| 2. <i>Anopheles gambiae</i>       | SRREAVSTTILNSAILESLNFRPPLLEYLVAHASLILKVLIGQHSLGEDAFITIDDDIFPQN           |                                                                         |       |       |       |       |       |    |  |
| 3. <i>Danio rerio</i>             | SRREAVSTTILNSAILESLNFRPPLLEYLVAHASLILKVLIGQHSLGEDAFITIDDDIFPQN           |                                                                         |       |       |       |       |       |    |  |
| 4. <i>Gallus gallus</i>           | SRREAVSTTILNSAILESLNFRPPLLEYLVAHASLILKVLIGQHSLGEDAFITIDDDIFPQN           |                                                                         |       |       |       |       |       |    |  |
| 5. <i>Canis lupus</i>             | SRREAVSTTILNSAILESLNFRPPLLEYLVAHASLILKVLIGQHSLGEDAFITIDDDIFPQN           |                                                                         |       |       |       |       |       |    |  |
| 6. <i>Bos taurus</i>              | SRREAVSTTILNSAILESLNFRPPLLEYLVAHASLILKVLIGQHSLGEDAFITIDDDIFPQN           |                                                                         |       |       |       |       |       |    |  |
| 7. <i>Macaca mulatta</i>          | SRREAVSTTILNSAILESLNFRPPLLEYLVAHASLILKVLIGQHSLGEDAFITIDDDIFPQN           |                                                                         |       |       |       |       |       |    |  |
| 8. <i>Rattus norvegicus</i>       | SRREAVSTTILNSAILESLNFRPPLLEYLVAHASLILKVLIGQHSLGEDAFITIDDDIFPQN           |                                                                         |       |       |       |       |       |    |  |
| 9. <i>Mus musculus</i>            | SRREAVSTTILNSAILESLNFRPPLLEYLVAHASLILKVLIGQHSLGEDAFITIDDDIFPQN           |                                                                         |       |       |       |       |       |    |  |
| 10. <i>Homo sapiens</i>           | SRREAVSTTILNSAILESLNFRPPLLEYLVAHASLILKVLIGQHSLGEDAFITIDDDIFPQN           |                                                                         |       |       |       |       |       |    |  |
