# Supplementary material
Source: publisher figshare collection journal article supplement (https://plos.figshare.com/articles/dataset/_/1259769)
Supplement: Supplementary file 1 [file 1 › Table_S2.xls]

## Sheet: Sheet1
Table S2. Significantly de-regulated genes expressed in the gcKO testes compared to the WT controls (cutoff: P<0.05, fold change>2).
isoform_id	sample_1	sample_2	Value_1	Value_2	Log2 (fold_change)	p_value	q_value	significant	isoform_id	gene_id	gene_short_name	locus	length
TCONS_00000019	gcKO	WT	45.5739	73.8967	-0.69729	0.00355	0.0456397	yes	TCONS_00000019	XLOC_000005	Rb1cc1	chr1:6204705-6266415	7046
TCONS_00000050	gcKO	WT	2.18703	0.682622	1.67836	0.0026	0.0353488	yes	TCONS_00000050	XLOC_000017	Prex2	chr1:10983545-11293763	11054
TCONS_00000188	gcKO	WT	25.721	52.9039	-1.0404	0.00275	0.037096	yes	TCONS_00000188	XLOC_000086	NA	chr1:37199756-37230790	713
TCONS_00000376	gcKO	WT	4.17461	2.09308	0.99567	2e-04	0.00353476	yes	TCONS_00000376	XLOC_000168	Aox3l1	chr1:58335169-58436108	4776
TCONS_00000389	gcKO	WT	11.4469	1.06067	3.43068	5e-05	0.00104398	yes	TCONS_00000389	XLOC_000176	Cdk15	chr1:59313750-59409213	1477
TCONS_00000439	gcKO	WT	14.7396	4.83243	1.60868	0.00315	0.0417543	yes	TCONS_00000439	XLOC_000197	Eef1b2	chr1:63223404-63227060	3110
TCONS_00000503	gcKO	WT	13.9148	7.54693	0.882571	0.00165	0.0240995	yes	TCONS_00000503	XLOC_000221	Igfbp2	chr1:72871053-72899045	1327
TCONS_00000524	gcKO	WT	3.25478	12.577	-1.94983	5e-05	0.00104398	yes	TCONS_00000524	XLOC_000231	Gm216	chr1:74408681-74415896	1942
TCONS_00000526	gcKO	WT	8.01739	3.83428	1.06398	1e-04	0.00182757	yes	TCONS_00000526	XLOC_000233	Ctdsp1	chr1:74438182-74443859	2776
TCONS_00000589	gcKO	WT	73.8525	31.6111	1.22419	5e-05	0.00104398	yes	TCONS_00000589	XLOC_000255	Inha	chr1:75503651-75506929	1463
TCONS_00000596	gcKO	WT	3.88229	1.27923	1.60088	0.0017	0.0247116	yes	TCONS_00000596	XLOC_000257	Slc4a3	chr1:75542712-75556364	5110
TCONS_00000671	gcKO	WT	11.4145	22.2596	-0.963498	0.0033	0.0430246	yes	TCONS_00000671	XLOC_000286	Armc9	chr1:88051350-88174859	2162
TCONS_00000762	gcKO	WT	1.65179	5.76681	-1.80312	1e-04	0.00182757	yes	TCONS_00000762	XLOC_000315	Gm19589	chr1:90448072-90458741	2622
TCONS_00000820	gcKO	WT	239.482	586.324	-1.29178	5e-05	0.00104398	yes	TCONS_00000820	XLOC_000337	Olfr1412	chr1:94484908-94485874	966
TCONS_00000879	gcKO	WT	11.4761	20.3058	-0.823205	5e-04	0.00825634	yes	TCONS_00000879	XLOC_000366	Fam174a	chr1:97210204-97231861	2107
TCONS_00001000	gcKO	WT	7.58713	13.7466	-0.857363	0.00215	0.0300538	yes	TCONS_00001000	XLOC_000412	Thsd7b	chr1:131169880-132115858	2447
TCONS_00001018	gcKO	WT	9.35193	5.38864	0.795229	0.00025	0.00433359	yes	TCONS_00001018	XLOC_000427	Slc41a1	chr1:133724588-133745440	4660
TCONS_00001019	gcKO	WT	7.36537	2.72425	1.43457	0.0034	0.0441689	yes	TCONS_00001019	XLOC_000428	Rab7l1	chr1:133763853-133769464	1189
TCONS_00001076	gcKO	WT	16.3406	9.69205	0.753527	0.0022	0.0306664	yes	TCONS_00001076	XLOC_000456	Cyb5r1	chr1:136302566-136308315	1626
TCONS_00001095	gcKO	WT	17.9617	11.1003	0.694276	0.00275	0.037096	yes	TCONS_00001095	XLOC_000467	Csrp1	chr1:137625773-137648806	1770
TCONS_00001261	gcKO	WT	849.519	0.001	18.6963	5e-05	0.00104398	yes	TCONS_00001261	XLOC_000547	NA	chr1:163101011-163101883	86
TCONS_00001336	gcKO	WT	1.28834	0.429255	1.58337	0.00045	0.00749931	yes	TCONS_00001336	XLOC_000578	Ildr2	chr1:168184269-168246963	8260
TCONS_00001360	gcKO	WT	5.74365	3.16025	0.861724	0.00165	0.0240995	yes	TCONS_00001360	XLOC_000590	Olfml2b	chr1:172574662-172612920	3095
TCONS_00001369	gcKO	WT	51.8353	98.8965	-0.931971	0.00115	0.0176741	yes	TCONS_00001369	XLOC_000594	Mpz	chr1:173080843-173091254	1993
TCONS_00001374	gcKO	WT	21.2194	2.32658	3.18855	0.00145	0.0216237	yes	TCONS_00001374	XLOC_000596	Apoa2	chr1:173155184-173156510	521
TCONS_00001384	gcKO	WT	2.41567	5.18335	-1.10114	5e-04	0.00825634	yes	TCONS_00001384	XLOC_000601	Pvrl4	chr1:173300303-173318418	3504
TCONS_00001410	gcKO	WT	16.6671	10.2214	0.705356	0.00175	0.0253456	yes	TCONS_00001410	XLOC_000615	Igsf8	chr1:174242537-174249966	2232
TCONS_00001495	gcKO	WT	176.925	296.252	-0.743684	0.00105	0.016314	yes	TCONS_00001495	XLOC_000662	Sccpdh	chr1:181598361-181617315	1922
TCONS_00001517	gcKO	WT	3.03933	1.25187	1.27899	0.0011	0.016978	yes	TCONS_00001517	XLOC_000672	Tmem63a	chr1:182872648-182905235	3239
TCONS_00001538	gcKO	WT	55.734	91.1966	-0.710412	0.0026	0.0353488	yes	TCONS_00001538	XLOC_000681	Srp9	chr1:184054346-184062546	1388
TCONS_00001619	gcKO	WT	53.1997	85.5685	-0.685651	0.00145	0.0216237	yes	TCONS_00001619	XLOC_000720	Nek2	chr1:193645091-193656930	3197
TCONS_00001699	gcKO	WT	93.1205	160.73	-0.787462	0.0019	0.0272203	yes	TCONS_00001699	XLOC_000750	Cops5	chr1:10014802-10126849	1239
TCONS_00001732	gcKO	WT	16.721	38.4677	-1.20194	0.00175	0.0253456	yes	TCONS_00001732	XLOC_000764	4930444P10Rik	chr1:16056056-16083273	717
TCONS_00001789	gcKO	WT	4.78539	7.81524	-0.707537	0.00215	0.0300538	yes	TCONS_00001789	XLOC_000790	4931408C20Rik	chr1:26738645-26744305	4331
TCONS_00001890	gcKO	WT	48.0015	88.8792	-0.888753	0.00135	0.0203078	yes	TCONS_00001890	XLOC_000830	Tsga10	chr1:37811367-37922055	3400
TCONS_00001912	gcKO	WT	28.7898	49.3919	-0.778696	3e-04	0.00513973	yes	TCONS_00001912	XLOC_000844	Rfx8	chr1:39722145-39777834	2000
TCONS_00001940	gcKO	WT	6.63677	10.2685	-0.629595	0.00375	0.0479163	yes	TCONS_00001940	XLOC_000859	NA	chr1:44112524-44136583	20220
TCONS_00001966	gcKO	WT	3.82163	2.28538	0.7415	0.0039	0.0494037	yes	TCONS_00001966	XLOC_000873	Nab1	chr1:52512692-52557292	5088
TCONS_00001972	gcKO	WT	48.8451	124.273	-1.34721	0.0027	0.0365208	yes	TCONS_00001972	XLOC_000876	1700019D03Rik	chr1:52981791-53048198	1008
TCONS_00002063	gcKO	WT	8.33402	18.8885	-1.18033	0.00045	0.00749931	yes	TCONS_00002063	XLOC_000906	Tmem237	chr1:59157436-59176940	1868
TCONS_00002125	gcKO	WT	120.556	67.7811	0.830739	2e-04	0.00353476	yes	TCONS_00002125	XLOC_000928	Akr1cl	chr1:65059291-65079322	1353
TCONS_00002182	gcKO	WT	1.8625	0.783246	1.24864	4e-04	0.00672247	yes	TCONS_00002182	XLOC_000950	Igfbp5	chr1:72904638-72921439	5854
TCONS_00002223	gcKO	WT	16.1946	36.6294	-1.17744	5e-05	0.00104398	yes	TCONS_00002223	XLOC_000969	Nhej1	chr1:75013919-75121800	938
TCONS_00002255	gcKO	WT	13.419	6.63403	1.01621	0.00085	0.0135078	yes	TCONS_00002255	XLOC_000980	Chpf	chr1:75471143-75476046	3092
TCONS_00002265	gcKO	WT	4.7939	2.37387	1.01365	8e-04	0.012821	yes	TCONS_00002265	XLOC_000986	Ap1s3	chr1:79603450-79668547	2876
TCONS_00002279	gcKO	WT	1.3428	0.598905	1.16351	2e-04	0.00353476	yes	TCONS_00002279	XLOC_000992	Irs1	chr1:82229679-82288014	9163
TCONS_00002468	gcKO	WT	10.0834	6.05841	0.734876	0.00105	0.016314	yes	TCONS_00002468	XLOC_001088	Inhbb	chr1:121312041-121318825	4255
TCONS_00002469	gcKO	WT	23.4573	13.3204	0.816353	1e-04	0.00182757	yes	TCONS_00002469	XLOC_001089	Ralb	chr1:121366881-121401359	2277
TCONS_00002555	gcKO	WT	14.9674	8.20789	0.866661	2e-04	0.00353476	yes	TCONS_00002555	XLOC_001127	Mapkapk2	chr1:132950280-132994120	2567
TCONS_00002609	gcKO	WT	3.32755	1.43448	1.21336	4e-04	0.00672247	yes	TCONS_00002609	XLOC_001145	Prelp	chr1:135806881-135817978	3601
TCONS_00002610	gcKO	WT	3.17503	7.96647	-1.3269	5e-05	0.00104398	yes	TCONS_00002610	XLOC_001146	Btg2	chr1:135971441-135975732	3083
TCONS_00002635	gcKO	WT	5.6938	2.38219	1.25675	5e-05	0.00104398	yes	TCONS_00002635	XLOC_001152	Lgr6	chr1:136882921-137001853	3312
TCONS_00002761	gcKO	WT	4.66066	2.38595	0.965675	5e-05	0.00104398	yes	TCONS_00002761	XLOC_001208	Lamc1	chr1:155066051-155179916	7622
TCONS_00002784	gcKO	WT	19.369	8.87639	1.12562	0.00315	0.0417543	yes	TCONS_00002784	XLOC_001224	Qsox1	chr1:157625211-157660029	3361
TCONS_00002911	gcKO	WT	7.22522	3.55242	1.02403	0.00015	0.00268331	yes	TCONS_00002911	XLOC_001274	Sft2d2	chr1:167104471-167124564	5526
TCONS_00002912	gcKO	WT	10.0509	16.4739	-0.712801	0.00255	0.0347881	yes	TCONS_00002912	XLOC_001275	Tiprl	chr1:167142416-167167116	4395
TCONS_00003026	gcKO	WT	13.9797	5.93217	1.23656	5e-05	0.00104398	yes	TCONS_00003026	XLOC_001325	Pea15a	chr1:174126859-174136912	2477
TCONS_00003126	gcKO	WT	77.1851	46.1195	0.742933	7e-04	0.0113235	yes	TCONS_00003126	XLOC_001384	Ephx1	chr1:182919686-182947626	1665
TCONS_00003247	gcKO	WT	3.53569	1.00408	1.81509	0.00035	0.00592226	yes	TCONS_00003247	XLOC_001433	Hhat	chr1:194336709-194597413	2835
TCONS_00003260	gcKO	WT	11.7552	2.1103	2.47722	0.00055	0.00903315	yes	TCONS_00003260	XLOC_001440	G0s2	chr1:195098353-195099382	843
TCONS_00003276	gcKO	WT	3032.37	728.655	2.05714	0.0032	0.0423041	yes	TCONS_00003276	XLOC_001452	NA	chr1:5160700-5160787	87
TCONS_00003281	gcKO	WT	625.93	0.001	18.2556	5e-05	0.00104398	yes	TCONS_00003281	XLOC_001457	NA	chr1:6917355-6917434	79
TCONS_00003282	gcKO	WT	1439.88	0.001	19.4575	5e-05	0.00104398	yes	TCONS_00003282	XLOC_001458	NA	chr1:7370943-7371000	57
TCONS_00003284	gcKO	WT	1494.5	0.001	19.5112	0.00025	0.00433359	yes	TCONS_00003284	XLOC_001460	NA	chr1:9711115-9711170	55
TCONS_00003295	gcKO	WT	0.001	154.812	-16.2402	0.0033	0.0430246	yes	TCONS_00003295	XLOC_001471	NA	chr1:11343124-11343221	97
TCONS_00003304	gcKO	WT	521.351	0.001	17.9919	1e-04	0.00182757	yes	TCONS_00003304	XLOC_001480	NA	chr1:15838109-15838186	77
TCONS_00003306	gcKO	WT	687.201	0.001	18.3904	5e-05	0.00104398	yes	TCONS_00003306	XLOC_001482	NA	chr1:16197673-16197761	88
TCONS_00003308	gcKO	WT	686.763	0.001	18.3895	5e-05	0.00104398	yes	TCONS_00003308	XLOC_001484	NA	chr1:17090018-17090110	92
TCONS_00003309	gcKO	WT	524.678	0.001	18.0011	5e-05	0.00104398	yes	TCONS_00003309	XLOC_001485	NA	chr1:17134509-17134613	104
TCONS_00003310	gcKO	WT	1062.72	0.001	19.0193	5e-05	0.00104398	yes	TCONS_00003310	XLOC_001486	NA	chr1:19230966-19231030	64
TCONS_00003311	gcKO	WT	766.349	0.001	18.5476	5e-05	0.00104398	yes	TCONS_00003311	XLOC_001487	NA	chr1:19606792-19606866	74
TCONS_00003314	gcKO	WT	1070.21	0.001	19.0295	5e-05	0.00104398	yes	TCONS_00003314	XLOC_001490	NA	chr1:22022029-22022097	68
TCONS_00003316	gcKO	WT	1146.66	0.001	19.129	5e-05	0.00104398	yes	TCONS_00003316	XLOC_001492	NA	chr1:23131968-23132036	68
TCONS_00003342	gcKO	WT	61.4302	0.001	14.9067	0.00235	0.032416	yes	TCONS_00003342	XLOC_001518	NA	chr1:25962006-25962135	129
TCONS_00003343	gcKO	WT	0.001	445.721	-17.7658	0.00155	0.022832	yes	TCONS_00003343	XLOC_001519	NA	chr1:27303079-27303152	73
TCONS_00003362	gcKO	WT	1459.08	0.001	19.4766	1e-04	0.00182757	yes	TCONS_00003362	XLOC_001538	NA	chr1:34857968-34858023	55
TCONS_00003364	gcKO	WT	429.634	0.001	17.7128	5e-05	0.00104398	yes	TCONS_00003364	XLOC_001540	NA	chr1:36361402-36361504	102
TCONS_00003367	gcKO	WT	1317.61	0.001	19.3295	5e-05	0.00104398	yes	TCONS_00003367	XLOC_001543	NA	chr1:38201656-38201718	62
TCONS_00003369	gcKO	WT	1171.49	0.001	19.1599	5e-05	0.00104398	yes	TCONS_00003369	XLOC_001545	NA	chr1:39063070-39063131	61
TCONS_00003372	gcKO	WT	0.001	168.823	-16.3652	5e-04	0.00825634	yes	TCONS_00003372	XLOC_001548	NA	chr1:39905531-39905635	104
TCONS_00003377	gcKO	WT	0.001	344.941	-17.396	1e-04	0.00182757	yes	TCONS_00003377	XLOC_001553	NA	chr1:40736726-40736814	88
TCONS_00003378	gcKO	WT	444.402	0.001	17.7615	5e-05	0.00104398	yes	TCONS_00003378	XLOC_001554	NA	chr1:41026857-41026969	112
TCONS_00003381	gcKO	WT	471.932	0.001	17.8482	5e-05	0.00104398	yes	TCONS_00003381	XLOC_001557	NA	chr1:42548505-42548605	100
TCONS_00003382	gcKO	WT	986.079	0.001	18.9113	5e-05	0.00104398	yes	TCONS_00003382	XLOC_001558	NA	chr1:42549544-42549626	82
TCONS_00003385	gcKO	WT	365.153	0.001	17.4781	5e-05	0.00104398	yes	TCONS_00003385	XLOC_001561	NA	chr1:43367110-43367206	96
TCONS_00003386	gcKO	WT	1104.06	0.001	19.0744	5e-05	0.00104398	yes	TCONS_00003386	XLOC_001562	NA	chr1:43804375-43804439	64
TCONS_00003398	gcKO	WT	0.001	1228.62	-19.2286	0.00195	0.0275981	yes	TCONS_00003398	XLOC_001574	NA	chr1:51754002-51754053	51
TCONS_00003399	gcKO	WT	585.217	0.001	18.1586	5e-05	0.00104398	yes	TCONS_00003399	XLOC_001575	NA	chr1:51997529-51997633	104
TCONS_00003400	gcKO	WT	454.086	0.001	17.7926	5e-05	0.00104398	yes	TCONS_00003400	XLOC_001576	NA	chr1:52502147-52502230	83
TCONS_00003401	gcKO	WT	597.185	0.001	18.1878	5e-05	0.00104398	yes	TCONS_00003401	XLOC_001577	NA	chr1:52611432-52611524	92
TCONS_00003404	gcKO	WT	2010.1	0.001	19.9388	5e-05	0.00104398	yes	TCONS_00003404	XLOC_001580	NA	chr1:54497127-54497193	66
TCONS_00003405	gcKO	WT	573.811	0.001	18.1302	5e-05	0.00104398	yes	TCONS_00003405	XLOC_001581	NA	chr1:54525878-54525974	96
TCONS_00003406	gcKO	WT	1528.88	0.001	19.544	5e-05	0.00104398	yes	TCONS_00003406	XLOC_001582	NA	chr1:54684640-54684708	68
TCONS_00003407	gcKO	WT	542.881	0.001	18.0503	1e-04	0.00182757	yes	TCONS_00003407	XLOC_001583	NA	chr1:55085277-55085353	76
TCONS_00003411	gcKO	WT	1140.79	0.001	19.1216	5e-05	0.00104398	yes	TCONS_00003411	XLOC_001587	NA	chr1:57187379-57187444	65
TCONS_00003412	gcKO	WT	1607.07	0.001	19.616	5e-05	0.00104398	yes	TCONS_00003412	XLOC_001588	NA	chr1:57211959-57212030	71
TCONS_00003420	gcKO	WT	428.696	0.001	17.7096	5e-05	0.00104398	yes	TCONS_00003420	XLOC_001596	NA	chr1:59506701-59506809	108
TCONS_00003421	gcKO	WT	728.842	0.001	18.4752	5e-05	0.00104398	yes	TCONS_00003421	XLOC_001597	NA	chr1:59514406-59514488	82
TCONS_00003428	gcKO	WT	1202.6	0.001	19.1977	5e-05	0.00104398	yes	TCONS_00003428	XLOC_001604	NA	chr1:59968305-59968393	88
TCONS_00003432	gcKO	WT	450.19	0.001	17.7802	0.00235	0.032416	yes	TCONS_00003432	XLOC_001608	NA	chr1:60626502-60626571	69
TCONS_00003435	gcKO	WT	836.059	0.001	18.6732	5e-05	0.00104398	yes	TCONS_00003435	XLOC_001611	NA	chr1:62949636-62949728	92
TCONS_00003445	gcKO	WT	787.131	0.001	18.5862	5e-05	0.00104398	yes	TCONS_00003445	XLOC_001621	NA	chr1:67922398-67922478	80
TCONS_00003448	gcKO	WT	688.904	0.001	18.3939	5e-05	0.00104398	yes	TCONS_00003448	XLOC_001624	NA	chr1:71884337-71884416	79
TCONS_00003453	gcKO	WT	4224.75	947.876	2.15609	0.00165	0.0240995	yes	TCONS_00003453	XLOC_001629	NA	chr1:72272602-72273150	548
TCONS_00003456	gcKO	WT	190.7	0.001	16.541	5e-05	0.00104398	yes	TCONS_00003456	XLOC_001632	NA	chr1:73174056-73174165	109
TCONS_00003460	gcKO	WT	0.001	416.865	-17.6692	0.00045	0.00749931	yes	TCONS_00003460	XLOC_001636	NA	chr1:75286014-75286093	79
TCONS_00003461	gcKO	WT	769.374	0.001	18.5533	5e-05	0.00104398	yes	TCONS_00003461	XLOC_001637	NA	chr1:76244347-76244417	70
TCONS_00003464	gcKO	WT	799.902	0.001	18.6095	1e-04	0.00182757	yes	TCONS_00003464	XLOC_001640	NA	chr1:79979582-79979649	67
TCONS_00003466	gcKO	WT	663.859	0.001	18.3405	5e-05	0.00104398	yes	TCONS_00003466	XLOC_001642	NA	chr1:81879597-81879697	100
TCONS_00003468	gcKO	WT	1001.81	0.001	18.9342	5e-05	0.00104398	yes	TCONS_00003468	XLOC_001644	NA	chr1:82812514-82812592	78
TCONS_00003474	gcKO	WT	1178.69	0.001	19.1688	1e-04	0.00182757	yes	TCONS_00003474	XLOC_001650	NA	chr1:84006956-84007015	59
TCONS_00003477	gcKO	WT	775.648	0.001	18.565	5e-05	0.00104398	yes	TCONS_00003477	XLOC_001653	NA	chr1:87814115-87814201	86
TCONS_00003478	gcKO	WT	769.374	0.001	18.5533	5e-05	0.00104398	yes	TCONS_00003478	XLOC_001654	NA	chr1:87830449-87830519	70
TCONS_00003480	gcKO	WT	705.566	0.001	18.4284	5e-05	0.00104398	yes	TCONS_00003480	XLOC_001656	NA	chr1:87929506-87929578	72
TCONS_00003481	gcKO	WT	3095.91	0.001	20.5619	1e-04	0.00182757	yes	TCONS_00003481	XLOC_001657	NA	chr1:88307770-88307813	43
TCONS_00003484	gcKO	WT	677.756	0.001	18.3704	5e-05	0.00104398	yes	TCONS_00003484	XLOC_001660	NA	chr1:88338582-88338659	77
TCONS_00003488	gcKO	WT	0.001	410.062	-17.6455	0.00155	0.022832	yes	TCONS_00003488	XLOC_001664	NA	chr1:89054348-89054423	75
TCONS_00003490	gcKO	WT	1351.94	0.001	19.3666	5e-05	0.00104398	yes	TCONS_00003490	XLOC_001666	NA	chr1:89505774-89505858	84
TCONS_00003492	gcKO	WT	1187.7	0.001	19.1797	5e-05	0.00104398	yes	TCONS_00003492	XLOC_001668	NA	chr1:90196503-90196578	75
TCONS_00003495	gcKO	WT	0.001	513.829	-17.9709	0.0033	0.0430246	yes	TCONS_00003495	XLOC_001671	NA	chr1:90907398-90907464	66
TCONS_00003497	gcKO	WT	346.238	0.001	17.4014	5e-05	0.00104398	yes	TCONS_00003497	XLOC_001673	NA	chr1:91080018-91080111	93
TCONS_00003498	gcKO	WT	1187.33	0.001	19.1793	5e-05	0.00104398	yes	TCONS_00003498	XLOC_001674	NA	chr1:91090178-91090247	69
TCONS_00003504	gcKO	WT	542.881	0.001	18.0503	1e-04	0.00182757	yes	TCONS_00003504	XLOC_001680	NA	chr1:93432928-93433004	76
TCONS_00003514	gcKO	WT	10.2211	2.16108	2.2412	0.00105	0.016314	yes	TCONS_00003514	XLOC_001690	NA	chr1:93825328-93826261	933
TCONS_00003516	gcKO	WT	445.452	0.001	17.7649	1e-04	0.00182757	yes	TCONS_00003516	XLOC_001692	NA	chr1:94072463-94072544	81
TCONS_00003521	gcKO	WT	71.1613	0.001	15.1188	0.0017	0.0247116	yes	TCONS_00003521	XLOC_001697	NA	chr1:94802735-94802862	127
TCONS_00003525	gcKO	WT	1041.85	0.001	18.9907	5e-05	0.00104398	yes	TCONS_00003525	XLOC_001701	NA	chr1:95267286-95267358	72
TCONS_00003529	gcKO	WT	81.6127	0.001	15.3165	5e-05	0.00104398	yes	TCONS_00003529	XLOC_001705	NA	chr1:95533072-95533213	141
TCONS_00003532	gcKO	WT	454.28	0.001	17.7932	0.00115	0.0176741	yes	TCONS_00003532	XLOC_001708	NA	chr1:96682751-96682823	72
TCONS_00003536	gcKO	WT	70.9122	0.001	15.1138	5e-05	0.00104398	yes	TCONS_00003536	XLOC_001712	NA	chr1:100413024-100413206	182
TCONS_00003537	gcKO	WT	988.168	0.001	18.9144	5e-05	0.00104398	yes	TCONS_00003537	XLOC_001713	NA	chr1:105574078-105574187	109
TCONS_00003542	gcKO	WT	116.67	0.001	15.8321	5e-05	0.00104398	yes	TCONS_00003542	XLOC_001718	NA	chr1:108663008-108663138	130
TCONS_00003543	gcKO	WT	601.089	0.001	18.1972	5e-05	0.00104398	yes	TCONS_00003543	XLOC_001719	NA	chr1:108916719-108916797	78
TCONS_00003544	gcKO	WT	0.001	451.088	-17.7831	5e-05	0.00104398	yes	TCONS_00003544	XLOC_001720	NA	chr1:109872707-109872801	94
TCONS_00003545	gcKO	WT	21.8053	0.001	13.4125	0.00315	0.0417543	yes	TCONS_00003545	XLOC_001721	NA	chr1:109875389-109875554	165
TCONS_00003548	gcKO	WT	3110.72	0.001	20.5688	5e-05	0.00104398	yes	TCONS_00003548	XLOC_001724	NA	chr1:113738208-113738257	49
TCONS_00003549	gcKO	WT	1835.77	0.001	19.808	1e-04	0.00182757	yes	TCONS_00003549	XLOC_001725	NA	chr1:113881281-113881332	51
TCONS_00003550	gcKO	WT	638.299	0.001	18.2839	5e-05	0.00104398	yes	TCONS_00003550	XLOC_001726	NA	chr1:113885526-113885625	99
TCONS_00003551	gcKO	WT	123.22	0.001	15.9109	5e-05	0.00104398	yes	TCONS_00003551	XLOC_001727	NA	chr1:115533063-115533194	131
TCONS_00003552	gcKO	WT	1564.05	0.001	19.5769	5e-05	0.00104398	yes	TCONS_00003552	XLOC_001728	NA	chr1:116595590-116595667	77
TCONS_00003553	gcKO	WT	279.262	0.001	17.0913	5e-05	0.00104398	yes	TCONS_00003553	XLOC_001729	NA	chr1:117083952-117084054	102
TCONS_00003557	gcKO	WT	954.731	0.001	18.8647	5e-05	0.00104398	yes	TCONS_00003557	XLOC_001733	NA	chr1:121097626-121097715	89
TCONS_00003558	gcKO	WT	1251.86	0.001	19.2556	5e-05	0.00104398	yes	TCONS_00003558	XLOC_001734	NA	chr1:121356404-121356483	79
TCONS_00003559	gcKO	WT	189.959	0.001	16.5353	5e-05	0.00104398	yes	TCONS_00003559	XLOC_001735	NA	chr1:121406102-121406222	120
TCONS_00003565	gcKO	WT	374652	829071	-1.14594	5e-05	0.00104398	yes	TCONS_00003565	XLOC_001741	NA	chr1:122419029-122419054	25
TCONS_00003566	gcKO	WT	220.332	0.001	16.7493	5e-05	0.00104398	yes	TCONS_00003566	XLOC_001742	NA	chr1:122710520-122710660	140
TCONS_00003569	gcKO	WT	573.811	0.001	18.1302	5e-05	0.00104398	yes	TCONS_00003569	XLOC_001745	NA	chr1:123187758-123187854	96
TCONS_00003570	gcKO	WT	958.223	0.001	18.87	5e-05	0.00104398	yes	TCONS_00003570	XLOC_001746	NA	chr1:123428917-123429008	91
TCONS_00003581	gcKO	WT	2079.66	0.001	19.9879	5e-05	0.00104398	yes	TCONS_00003581	XLOC_001757	NA	chr1:133575303-133575379	76
TCONS_00003589	gcKO	WT	1074.58	0.001	19.0353	5e-05	0.00104398	yes	TCONS_00003589	XLOC_001765	NA	chr1:134641048-134641123	75
TCONS_00003590	gcKO	WT	747.981	0.001	18.5126	5e-05	0.00104398	yes	TCONS_00003590	XLOC_001766	NA	chr1:134647146-134647233	87
TCONS_00003593	gcKO	WT	115.543	0.001	15.8181	0.00385	0.0489108	yes	TCONS_00003593	XLOC_001769	NA	chr1:135728171-135728269	98
TCONS_00003595	gcKO	WT	479.453	0.001	17.871	5e-05	0.00104398	yes	TCONS_00003595	XLOC_001771	NA	chr1:135828956-135829053	97
TCONS_00003597	gcKO	WT	312.989	0.001	17.2558	5e-05	0.00104398	yes	TCONS_00003597	XLOC_001773	NA	chr1:135976127-135976223	96
TCONS_00003604	gcKO	WT	1411.13	0.001	19.4284	5e-05	0.00104398	yes	TCONS_00003604	XLOC_001780	NA	chr1:137078115-137078187	72
TCONS_00003606	gcKO	WT	784.502	0.001	18.5814	5e-05	0.00104398	yes	TCONS_00003606	XLOC_001782	NA	chr1:137080670-137080744	74
TCONS_00003608	gcKO	WT	0.001	2244.97	-20.0983	0.00035	0.00592226	yes	TCONS_00003608	XLOC_001784	NA	chr1:137501396-137501442	46
TCONS_00003609	gcKO	WT	202.623	0.001	16.6284	5e-05	0.00104398	yes	TCONS_00003609	XLOC_001785	NA	chr1:137525658-137525778	120
TCONS_00003610	gcKO	WT	1697.06	0.001	19.6946	5e-05	0.00104398	yes	TCONS_00003610	XLOC_001786	NA	chr1:138486113-138486167	54
TCONS_00003611	gcKO	WT	390.457	0.001	17.5748	5e-05	0.00104398	yes	TCONS_00003611	XLOC_001787	NA	chr1:138491279-138491373	94
TCONS_00003613	gcKO	WT	1228.54	0.001	19.2285	5e-05	0.00104398	yes	TCONS_00003613	XLOC_001789	NA	chr1:139198272-139198337	65
TCONS_00003638	gcKO	WT	921.296	0.001	18.8133	5e-05	0.00104398	yes	TCONS_00003638	XLOC_001814	NA	chr1:153182568-153182634	66
TCONS_00003642	gcKO	WT	2339.9	0.001	20.158	5e-05	0.00104398	yes	TCONS_00003642	XLOC_001818	NA	chr1:153381969-153382019	50
TCONS_00003644	gcKO	WT	269.276	0.001	17.0387	5e-05	0.00104398	yes	TCONS_00003644	XLOC_001820	NA	chr1:153599054-153599164	110
TCONS_00003645	gcKO	WT	849.519	0.001	18.6963	5e-05	0.00104398	yes	TCONS_00003645	XLOC_001821	NA	chr1:153600707-153600793	86
TCONS_00003651	gcKO	WT	174.697	0.001	16.4145	0.00355	0.0456397	yes	TCONS_00003651	XLOC_001827	NA	chr1:155433854-155433946	92
TCONS_00003654	gcKO	WT	0.001	116.976	-15.8359	0.0012	0.0183009	yes	TCONS_00003654	XLOC_001830	NA	chr1:155769627-155769741	114
TCONS_00003656	gcKO	WT	715.732	0.001	18.4491	5e-05	0.00104398	yes	TCONS_00003656	XLOC_001832	NA	chr1:155958977-155959061	84
TCONS_00003657	gcKO	WT	1490.99	0.001	19.5078	5e-05	0.00104398	yes	TCONS_00003657	XLOC_001833	NA	chr1:155964616-155964677	61
TCONS_00003664	gcKO	WT	578.536	0.001	18.142	5e-05	0.00104398	yes	TCONS_00003664	XLOC_001840	NA	chr1:157617407-157617494	87
TCONS_00003667	gcKO	WT	0.001	154.785	-16.2399	1e-04	0.00182757	yes	TCONS_00003667	XLOC_001843	NA	chr1:157663620-157663733	113
TCONS_00003668	gcKO	WT	1053.03	0.001	19.0061	5e-05	0.00104398	yes	TCONS_00003668	XLOC_001844	NA	chr1:157664890-157664955	65
TCONS_00003669	gcKO	WT	1649.92	0.001	19.654	5e-05	0.00104398	yes	TCONS_00003669	XLOC_001845	NA	chr1:157670415-157670470	55
TCONS_00003680	gcKO	WT	2005.61	0.001	19.9356	5e-05	0.00104398	yes	TCONS_00003680	XLOC_001856	NA	chr1:160950899-160950953	54
TCONS_00003681	gcKO	WT	596.444	0.001	18.186	5e-05	0.00104398	yes	TCONS_00003681	XLOC_001857	NA	chr1:161093524-161093608	84
TCONS_00003684	gcKO	WT	1114.9	0.001	19.0885	5e-05	0.00104398	yes	TCONS_00003684	XLOC_001860	NA	chr1:161343715-161343777	62
TCONS_00003687	gcKO	WT	736.575	0.001	18.4905	5e-05	0.00104398	yes	TCONS_00003687	XLOC_001863	NA	chr1:163409385-163409456	71
TCONS_00003689	gcKO	WT	986.079	0.001	18.9113	5e-05	0.00104398	yes	TCONS_00003689	XLOC_001865	NA	chr1:163851663-163851745	82
TCONS_00003692	gcKO	WT	2399.94	0.001	20.1946	5e-05	0.00104398	yes	TCONS_00003692	XLOC_001868	NA	chr1:164499177-164499227	50
TCONS_00003693	gcKO	WT	1172.56	0.001	19.1612	5e-05	0.00104398	yes	TCONS_00003693	XLOC_001869	NA	chr1:165506678-165506744	66
TCONS_00003694	gcKO	WT	440.062	0.001	17.7474	5e-05	0.00104398	yes	TCONS_00003694	XLOC_001870	NA	chr1:165851750-165851852	102
TCONS_00003700	gcKO	WT	2078.03	0.001	19.9868	5e-05	0.00104398	yes	TCONS_00003700	XLOC_001876	NA	chr1:166401552-166401630	78
TCONS_00003703	gcKO	WT	922.897	0.001	18.8158	5e-05	0.00104398	yes	TCONS_00003703	XLOC_001879	NA	chr1:166419326-166419402	76
TCONS_00003707	gcKO	WT	403.75	0.001	17.6231	5e-05	0.00104398	yes	TCONS_00003707	XLOC_001883	NA	chr1:166856786-166856883	97
TCONS_00003712	gcKO	WT	2356.16	0.001	20.168	5e-05	0.00104398	yes	TCONS_00003712	XLOC_001888	NA	chr1:167050157-167050214	57
TCONS_00003713	gcKO	WT	2491.05	0.001	20.2483	5e-05	0.00104398	yes	TCONS_00003713	XLOC_001889	NA	chr1:167054065-167054125	60
TCONS_00003714	gcKO	WT	73.4102	0.001	15.1637	5e-05	0.00104398	yes	TCONS_00003714	XLOC_001890	NA	chr1:167255964-167256155	191
TCONS_00003715	gcKO	WT	600.223	0.001	18.1951	5e-05	0.00104398	yes	TCONS_00003715	XLOC_001891	NA	chr1:167509145-167509227	82
TCONS_00003716	gcKO	WT	1747.63	0.001	19.737	5e-05	0.00104398	yes	TCONS_00003716	XLOC_001892	NA	chr1:167511477-167511539	62
TCONS_00003717	gcKO	WT	1160.1	0.001	19.1458	5e-05	0.00104398	yes	TCONS_00003717	XLOC_001893	NA	chr1:167519253-167519343	90
TCONS_00003723	gcKO	WT	1343.25	0.001	19.3573	5e-05	0.00104398	yes	TCONS_00003723	XLOC_001899	NA	chr1:171258502-171258585	83
TCONS_00003725	gcKO	WT	1299.54	0.001	19.3096	5e-05	0.00104398	yes	TCONS_00003725	XLOC_001901	NA	chr1:172906490-172906558	68
TCONS_00003730	gcKO	WT	1365.73	0.001	19.3812	5e-05	0.00104398	yes	TCONS_00003730	XLOC_001906	NA	chr1:174585724-174585782	58
TCONS_00003732	gcKO	WT	1.60934	0.001	9.65315	0.00015	0.00268331	yes	TCONS_00003732	XLOC_001908	NA	chr1:174880277-174880918	641
TCONS_00003734	gcKO	WT	2718.28	0.001	20.3743	5e-05	0.00104398	yes	TCONS_00003734	XLOC_001910	NA	chr1:176413621-176413669	48
TCONS_00003737	gcKO	WT	0.001	158.22	-16.2716	0.00195	0.0275981	yes	TCONS_00003737	XLOC_001913	NA	chr1:178543408-178543507	99
TCONS_00003738	gcKO	WT	332.63	0.001	17.3436	5e-05	0.00104398	yes	TCONS_00003738	XLOC_001914	NA	chr1:178654844-178654949	105
TCONS_00003740	gcKO	WT	938.431	0.001	18.8399	5e-05	0.00104398	yes	TCONS_00003740	XLOC_001916	NA	chr1:179630530-179630607	77
TCONS_00003758	gcKO	WT	1398.86	0.001	19.4158	5e-05	0.00104398	yes	TCONS_00003758	XLOC_001934	NA	chr1:181889667-181889737	70
TCONS_00003760	gcKO	WT	915.667	0.001	18.8045	5e-05	0.00104398	yes	TCONS_00003760	XLOC_001936	NA	chr1:182478595-182478695	100
TCONS_00003781	gcKO	WT	0.001	579.961	-18.1456	0.00155	0.022832	yes	TCONS_00003781	XLOC_001957	NA	chr1:185836599-185836666	67
TCONS_00003786	gcKO	WT	651.18	0.001	18.3127	5e-05	0.00104398	yes	TCONS_00003786	XLOC_001962	NA	chr1:186915029-186915107	78
TCONS_00003788	gcKO	WT	1675.08	0.001	19.6758	5e-05	0.00104398	yes	TCONS_00003788	XLOC_001964	NA	chr1:188747378-188747444	66
TCONS_00003789	gcKO	WT	365.153	0.001	17.4781	5e-05	0.00104398	yes	TCONS_00003789	XLOC_001965	NA	chr1:188748161-188748257	96
TCONS_00003791	gcKO	WT	534.542	0.001	18.0279	5e-05	0.00104398	yes	TCONS_00003791	XLOC_001967	NA	chr1:191284160-191284241	81
TCONS_00003794	gcKO	WT	1169.59	0.001	19.1576	5e-05	0.00104398	yes	TCONS_00003794	XLOC_001970	NA	chr1:192402613-192402682	69
TCONS_00003796	gcKO	WT	1834.1	0.001	19.8066	5e-05	0.00104398	yes	TCONS_00003796	XLOC_001972	NA	chr1:193642451-193642514	63
TCONS_00003798	gcKO	WT	1410.75	0.001	19.428	5e-05	0.00104398	yes	TCONS_00003798	XLOC_001974	NA	chr1:195295278-195295335	57
TCONS_00003799	gcKO	WT	851.543	0.001	18.6997	5e-05	0.00104398	yes	TCONS_00003799	XLOC_001975	NA	chr1:195807614-195807692	78
TCONS_00003800	gcKO	WT	0.001	29.1281	-13.8302	0.0027	0.0365208	yes	TCONS_00003800	XLOC_001976	NA	chr1:196440393-196440552	159
TCONS_00003862	gcKO	WT	17.3581	31.1675	-0.844397	0.0036	0.0461779	yes	TCONS_00003862	XLOC_002010	Fbxo30	chr10:11001127-11017767	4943
TCONS_00003866	gcKO	WT	1.8081	0.733912	1.29963	0.00115	0.0176741	yes	TCONS_00003866	XLOC_002013	Plagl1	chr10:12810593-12851501	5261
TCONS_00003953	gcKO	WT	3.66968	0.944262	1.95726	0.00145	0.0216237	yes	TCONS_00003953	XLOC_002052	Vnn1	chr10:23614493-23625149	2416
TCONS_00004012	gcKO	WT	2.35827	1.26541	0.897596	0.00205	0.0288285	yes	TCONS_00004012	XLOC_002090	Lama4	chr10:38685320-38829994	6046
TCONS_00004098	gcKO	WT	4.74951	2.2882	1.05324	0.001	0.0156412	yes	TCONS_00004098	XLOC_002128	Prep	chr10:44787019-44878801	2719
TCONS_00004156	gcKO	WT	3.79463	1.23298	1.62102	0.00135	0.0203078	yes	TCONS_00004156	XLOC_002162	Lims1	chr10:57786110-57887439	4327
TCONS_00004184	gcKO	WT	28.6606	15.1995	0.915	0.00035	0.00592226	yes	TCONS_00004184	XLOC_002173	Spock2	chr10:59568928-59597951	5281
TCONS_00004379	gcKO	WT	21.0508	6.64004	1.66446	5e-05	0.00104398	yes	TCONS_00004379	XLOC_002242	Chchd10	chr10:75398317-75400479	948
TCONS_00004427	gcKO	WT	49.5566	80.4658	-0.699287	0.0017	0.0247116	yes	TCONS_00004427	XLOC_002274	1700009J07Rik	chr10:77356164-77358856	914
TCONS_00004480	gcKO	WT	5.5861	2.34698	1.25068	5e-05	0.00104398	yes	TCONS_00004480	XLOC_002312	Abca7	chr10:79460359-79478317	6594
TCONS_00004550	gcKO	WT	4.75092	2.22496	1.09408	1e-04	0.00182757	yes	TCONS_00004550	XLOC_002343	Zbtb7a	chr10:80599015-80614402	5373
TCONS_00004587	gcKO	WT	45.0517	26.0517	0.790181	0.00385	0.0489108	yes	TCONS_00004587	XLOC_002357	Aes	chr10:81022188-81029116	1470
TCONS_00004661	gcKO	WT	9.65164	5.30324	0.863778	0.00085	0.0135078	yes	TCONS_00004661	XLOC_002390	Timp3	chr10:85511490-85961641	4681
TCONS_00004679	gcKO	WT	6.32062	3.26583	0.952403	2e-04	0.00353476	yes	TCONS_00004679	XLOC_002394	Nt5dc3	chr10:86241749-86301225	5952
TCONS_00004750	gcKO	WT	65.6709	28.029	1.2283	5e-05	0.00104398	yes	TCONS_00004750	XLOC_002418	Ntn4	chr10:93103793-93208717	2411
TCONS_00005067	gcKO	WT	3.18149	1.88579	0.754222	0.00335	0.0436192	yes	TCONS_00005067	XLOC_002546	Zbtb39	chr10:127176593-127184395	5950
TCONS_00005111	gcKO	WT	3.52473	1.72768	1.02825	1e-04	0.00182757	yes	TCONS_00005111	XLOC_002569	Ankrd52	chr10:127814179-127831062	6615
TCONS_00005283	gcKO	WT	2.28251	1.20744	0.918107	3e-04	0.00513973	yes	TCONS_00005283	XLOC_002651	D10Bwg1379e	chr10:18307816-18463564	8216
TCONS_00005336	gcKO	WT	151360	54471.1	1.47442	0.0036	0.0461779	yes	TCONS_00005336	XLOC_002671	Snord100	chr10:23504988-23507015	68
TCONS_00005412	gcKO	WT	10.8533	6.68897	0.698195	0.0023	0.0318702	yes	TCONS_00005412	XLOC_002713	Marcks	chr10:36853048-36858732	4186
TCONS_00005541	gcKO	WT	16.5516	8.74954	0.919614	0.00025	0.00433359	yes	TCONS_00005541	XLOC_002775	Ddit4	chr10:59412422-59414518	1685
TCONS_00005563	gcKO	WT	9.16508	5.66421	0.694175	0.00235	0.032416	yes	TCONS_00005563	XLOC_002782	Sgpl1	chr10:60561389-60610413	4123
TCONS_00005567	gcKO	WT	10.6498	5.75994	0.886586	0.00025	0.00433359	yes	TCONS_00005567	XLOC_002785	Eif4ebp2	chr10:60891227-60915575	5961
TCONS_00005672	gcKO	WT	92.5905	177.865	-0.941839	5e-05	0.00104398	yes	TCONS_00005672	XLOC_002832	1700049L16Rik	chr10:71442632-71443438	806
TCONS_00005695	gcKO	WT	152.645	251.303	-0.719244	0.0011	0.016978	yes	TCONS_00005695	XLOC_002844	Gstt4	chr10:75277686-75285288	963
TCONS_00005737	gcKO	WT	3.89811	2.12474	0.87518	0.0021	0.0294586	yes	TCONS_00005737	XLOC_002856	Col6a2	chr10:76058500-76086149	3729
TCONS_00005790	gcKO	WT	3.32503	1.39663	1.25082	5e-05	0.00104398	yes	TCONS_00005790	XLOC_002878	Pdxk	chr10:77899491-77927693	5094
TCONS_00005811	gcKO	WT	4.3833	2.424	0.854362	0.0017	0.0247116	yes	TCONS_00005811	XLOC_002891	Shc2	chr10:79080682-79100663	3957
TCONS_00005949	gcKO	WT	9.6137	5.89821	0.70472	0.00185	0.0265711	yes	TCONS_00005949	XLOC_002959	Slc41a2	chr10:82693883-82800562	4386
TCONS_00006024	gcKO	WT	9.87106	17.5578	-0.830771	9e-04	0.0142341	yes	TCONS_00006024	XLOC_002993	Actr6	chr10:89174713-89195122	1703
TCONS_00006027	gcKO	WT	982.412	424.618	1.21016	8e-04	0.012821	yes	TCONS_00006027	XLOC_002995	Slc25a3	chr10:90579317-90586708	1158
TCONS_00006048	gcKO	WT	5.12375	9.06902	-0.823624	0.00095	0.0149297	yes	TCONS_00006048	XLOC_003004	NA	chr10:92333328-92427391	3657
TCONS_00006073	gcKO	WT	5.67842	3.06225	0.89068	0.00015	0.00268331	yes	TCONS_00006073	XLOC_003017	Plxnc1	chr10:94253611-94407212	7044
TCONS_00006333	gcKO	WT	4.53438	2.19288	1.04774	0.0029	0.0388424	yes	TCONS_00006333	XLOC_003148	Rbms2	chr10:127566525-127617353	5207
TCONS_00006425	gcKO	WT	1279.84	0.001	19.2875	5e-05	0.00104398	yes	TCONS_00006425	XLOC_003215	NA	chr10:6806489-6806556	67
TCONS_00006429	gcKO	WT	369.357	0.001	17.4947	1e-04	0.00182757	yes	TCONS_00006429	XLOC_003219	NA	chr10:9062006-9062092	86
TCONS_00006431	gcKO	WT	16615.1	0.001	22.986	0.002	0.0281652	yes	TCONS_00006431	XLOC_003221	NA	chr10:9075390-9075413	23
TCONS_00006434	gcKO	WT	1254.91	0.001	19.2592	5e-05	0.00104398	yes	TCONS_00006434	XLOC_003224	NA	chr10:9808972-9809035	63
TCONS_00006447	gcKO	WT	2076.5	0.001	19.9857	5e-05	0.00104398	yes	TCONS_00006447	XLOC_003237	NA	chr10:11973941-11973993	52
TCONS_00006448	gcKO	WT	1351.44	0.001	19.3661	5e-05	0.00104398	yes	TCONS_00006448	XLOC_003238	NA	chr10:12588351-12588414	63
TCONS_00006450	gcKO	WT	1146.66	0.001	19.129	5e-05	0.00104398	yes	TCONS_00006450	XLOC_003240	NA	chr10:13287440-13287508	68
TCONS_00006452	gcKO	WT	676.228	0.001	18.3672	5e-05	0.00104398	yes	TCONS_00006452	XLOC_003242	NA	chr10:14032409-14032482	73
TCONS_00006456	gcKO	WT	601.155	0.001	18.1974	5e-05	0.00104398	yes	TCONS_00006456	XLOC_003246	NA	chr10:17972154-17972233	79
TCONS_00006457	gcKO	WT	1256.31	0.001	19.2608	5e-05	0.00104398	yes	TCONS_00006457	XLOC_003247	NA	chr10:18095312-18095378	66
TCONS_00006458	gcKO	WT	0.001	26.0367	-13.6683	0.00195	0.0275981	yes	TCONS_00006458	XLOC_003248	NA	chr10:18111309-18111480	171
TCONS_00006474	gcKO	WT	1059.26	0.001	19.0146	5e-05	0.00104398	yes	TCONS_00006474	XLOC_003264	NA	chr10:21095195-21095274	79
TCONS_00006476	gcKO	WT	0.001	23.5632	-13.5243	5e-05	0.00104398	yes	TCONS_00006476	XLOC_003266	NA	chr10:21398937-21399172	235
TCONS_00006478	gcKO	WT	73.8539	0.001	15.1724	5e-05	0.00104398	yes	TCONS_00006478	XLOC_003268	NA	chr10:21762689-21762839	150
TCONS_00006488	gcKO	WT	0.001	368.37	-17.4908	0.00035	0.00592226	yes	TCONS_00006488	XLOC_003278	NA	chr10:24838645-24838728	83
TCONS_00006489	gcKO	WT	701.271	0.001	18.4196	5e-05	0.00104398	yes	TCONS_00006489	XLOC_003279	NA	chr10:24842579-24842657	78
TCONS_00006494	gcKO	WT	804.095	0.001	18.617	5e-05	0.00104398	yes	TCONS_00006494	XLOC_003284	NA	chr10:29082548-29082617	69
TCONS_00006497	gcKO	WT	218.971	0.001	16.7404	5e-05	0.00104398	yes	TCONS_00006497	XLOC_003287	NA	chr10:29995474-29995600	126
TCONS_00006498	gcKO	WT	562.084	0.001	18.1004	5e-05	0.00104398	yes	TCONS_00006498	XLOC_003288	NA	chr10:30341108-30341211	103
TCONS_00006499	gcKO	WT	1639.33	0.001	19.6447	0.00025	0.00433359	yes	TCONS_00006499	XLOC_003289	NA	chr10:30358090-30358141	51
TCONS_00006502	gcKO	WT	1604.99	0.001	19.6141	5e-05	0.00104398	yes	TCONS_00006502	XLOC_003292	NA	chr10:34698533-34698588	55
TCONS_00006509	gcKO	WT	685.969	0.001	18.3878	5e-05	0.00104398	yes	TCONS_00006509	XLOC_003299	NA	chr10:40402370-40402452	82
TCONS_00006510	gcKO	WT	1579.55	0.001	19.5911	5e-05	0.00104398	yes	TCONS_00006510	XLOC_003300	NA	chr10:40809370-40809435	65
TCONS_00006522	gcKO	WT	641.424	0.001	18.2909	1e-04	0.00182757	yes	TCONS_00006522	XLOC_003312	NA	chr10:42430460-42430532	72
TCONS_00006531	gcKO	WT	1391.7	0.001	19.4084	5e-05	0.00104398	yes	TCONS_00006531	XLOC_003321	NA	chr10:44782978-44783062	84
TCONS_00006533	gcKO	WT	1818.52	0.001	19.7943	5e-05	0.00104398	yes	TCONS_00006533	XLOC_003323	NA	chr10:45197551-45197621	70
TCONS_00006535	gcKO	WT	0.001	137.587	-16.07	0.00155	0.022832	yes	TCONS_00006535	XLOC_003325	NA	chr10:47893040-47893146	106
TCONS_00006536	gcKO	WT	1532.7	0.001	19.5476	5e-05	0.00104398	yes	TCONS_00006536	XLOC_003326	NA	chr10:49519222-49519296	74
TCONS_00006537	gcKO	WT	1656.09	0.001	19.6594	5e-05	0.00104398	yes	TCONS_00006537	XLOC_003327	NA	chr10:49719669-49719733	64
TCONS_00006546	gcKO	WT	1424.72	0.001	19.4422	5e-05	0.00104398	yes	TCONS_00006546	XLOC_003336	NA	chr10:54050488-54050575	87
TCONS_00006548	gcKO	WT	722.226	0.001	18.4621	5e-05	0.00104398	yes	TCONS_00006548	XLOC_003338	NA	chr10:54135340-54135419	79
TCONS_00006549	gcKO	WT	28887.1	0.001	23.7839	1e-04	0.00182757	yes	TCONS_00006549	XLOC_003339	NA	chr10:54263725-54263748	23
TCONS_00006554	gcKO	WT	1103.35	0.001	19.0735	5e-05	0.00104398	yes	TCONS_00006554	XLOC_003344	NA	chr10:56760833-56760936	103
TCONS_00006558	gcKO	WT	317.385	0.001	17.2759	5e-05	0.00104398	yes	TCONS_00006558	XLOC_003348	NA	chr10:59568082-59568175	93
TCONS_00006567	gcKO	WT	2463.87	0.001	20.2325	5e-05	0.00104398	yes	TCONS_00006567	XLOC_003357	NA	chr10:65694370-65694430	60
TCONS_00006568	gcKO	WT	619.81	0.001	18.2415	5e-05	0.00104398	yes	TCONS_00006568	XLOC_003358	NA	chr10:66134222-66134341	119
TCONS_00006572	gcKO	WT	656.359	0.001	18.3241	5e-05	0.00104398	yes	TCONS_00006572	XLOC_003362	NA	chr10:66172396-66172506	110
TCONS_00006574	gcKO	WT	0.001	672.226	-18.3586	1e-04	0.00182757	yes	TCONS_00006574	XLOC_003364	NA	chr10:66203908-66203979	71
TCONS_00006576	gcKO	WT	1542.78	0.001	19.5571	1e-04	0.00182757	yes	TCONS_00006576	XLOC_003366	NA	chr10:66225936-66225990	54
TCONS_00006579	gcKO	WT	622.128	0.001	18.2469	5e-05	0.00104398	yes	TCONS_00006579	XLOC_003369	NA	chr10:66287255-66287330	75
TCONS_00006581	gcKO	WT	1236.41	0.001	19.2377	5e-05	0.00104398	yes	TCONS_00006581	XLOC_003371	NA	chr10:66377292-66377383	91
TCONS_00006583	gcKO	WT	418.03	0.001	17.6733	5e-05	0.00104398	yes	TCONS_00006583	XLOC_003373	NA	chr10:66462697-66462789	92
TCONS_00006584	gcKO	WT	877.194	0.001	18.7425	5e-05	0.00104398	yes	TCONS_00006584	XLOC_003374	NA	chr10:66750876-66750945	69
TCONS_00006586	gcKO	WT	1605.32	0.001	19.6144	5e-05	0.00104398	yes	TCONS_00006586	XLOC_003376	NA	chr10:66950333-66950401	68
TCONS_00006587	gcKO	WT	0.001	168.886	-16.3657	0.00195	0.0275981	yes	TCONS_00006587	XLOC_003377	NA	chr10:66954888-66954985	97
TCONS_00006588	gcKO	WT	1703.99	0.001	19.7005	5e-05	0.00104398	yes	TCONS_00006588	XLOC_003378	NA	chr10:67149315-67149376	61
TCONS_00006594	gcKO	WT	1003.93	0.001	18.9372	5e-05	0.00104398	yes	TCONS_00006594	XLOC_003384	NA	chr10:67849380-67849447	67
TCONS_00006597	gcKO	WT	1459.08	0.001	19.4766	1e-04	0.00182757	yes	TCONS_00006597	XLOC_003387	NA	chr10:68367861-68367916	55
TCONS_00006601	gcKO	WT	5.58292	11.8005	-1.07962	0.00355	0.0456397	yes	TCONS_00006601	XLOC_003391	NA	chr10:68628720-68629634	914
TCONS_00006613	gcKO	WT	687.201	0.001	18.3904	5e-05	0.00104398	yes	TCONS_00006613	XLOC_003403	NA	chr10:71574628-71574716	88
TCONS_00006614	gcKO	WT	1049.14	0.001	19.0008	5e-05	0.00104398	yes	TCONS_00006614	XLOC_003404	NA	chr10:72104374-72104444	70
TCONS_00006618	gcKO	WT	1096.49	0.001	19.0645	5e-05	0.00104398	yes	TCONS_00006618	XLOC_003408	NA	chr10:75273704-75273773	69
TCONS_00006622	gcKO	WT	1355.85	0.001	19.3708	5e-05	0.00104398	yes	TCONS_00006622	XLOC_003412	NA	chr10:75332898-75332972	74
TCONS_00006629	gcKO	WT	877.194	0.001	18.7425	5e-05	0.00104398	yes	TCONS_00006629	XLOC_003419	NA	chr10:76661796-76661865	69
TCONS_00006632	gcKO	WT	39885.4	0.001	24.2494	1e-04	0.00182757	yes	TCONS_00006632	XLOC_003422	NA	chr10:77617602-77617623	21
TCONS_00006633	gcKO	WT	769.374	0.001	18.5533	5e-05	0.00104398	yes	TCONS_00006633	XLOC_003423	NA	chr10:77835714-77835784	70
TCONS_00006635	gcKO	WT	403.75	0.001	17.6231	5e-05	0.00104398	yes	TCONS_00006635	XLOC_003425	NA	chr10:78571051-78571148	97
TCONS_00006639	gcKO	WT	0.001	240.41	-16.8751	0.00155	0.022832	yes	TCONS_00006639	XLOC_003429	NA	chr10:79143601-79143690	89
TCONS_00006644	gcKO	WT	1491.8	0.001	19.5086	5e-05	0.00104398	yes	TCONS_00006644	XLOC_003434	NA	chr10:79239784-79239849	65
TCONS_00006645	gcKO	WT	0.001	3041.59	-20.5364	0.00155	0.022832	yes	TCONS_00006645	XLOC_003435	NA	chr10:79309303-79309342	39
TCONS_00006647	gcKO	WT	190.7	0.001	16.541	5e-05	0.00104398	yes	TCONS_00006647	XLOC_003437	NA	chr10:79573159-79573268	109
TCONS_00006650	gcKO	WT	574.739	0.001	18.1325	5e-05	0.00104398	yes	TCONS_00006650	XLOC_003440	NA	chr10:79942936-79943021	85
TCONS_00006652	gcKO	WT	1240.86	0.001	19.2429	5e-05	0.00104398	yes	TCONS_00006652	XLOC_003442	NA	chr10:80138842-80138904	62
TCONS_00006657	gcKO	WT	441.682	0.001	17.7527	5e-05	0.00104398	yes	TCONS_00006657	XLOC_003447	NA	chr10:81480883-81480976	93
TCONS_00006659	gcKO	WT	565.571	0.001	18.1094	1e-04	0.00182757	yes	TCONS_00006659	XLOC_003449	NA	chr10:81590149-81590224	75
TCONS_00006663	gcKO	WT	247.616	0.001	16.9178	0.0011	0.016978	yes	TCONS_00006663	XLOC_003453	NA	chr10:82836462-82836549	87
TCONS_00006669	gcKO	WT	1824.72	0.001	19.7992	5e-05	0.00104398	yes	TCONS_00006669	XLOC_003459	NA	chr10:83390164-83390241	77
TCONS_00006675	gcKO	WT	0.001	3.59358	-10.8116	0.0028	0.0376809	yes	TCONS_00006675	XLOC_003465	NA	chr10:84378995-84379288	293
TCONS_00006678	gcKO	WT	2.15903	4.18584	-0.95481	0.0016	0.0234468	yes	TCONS_00006678	XLOC_003468	NA	chr10:85235350-85239295	3945
TCONS_00006683	gcKO	WT	0.001	61.1945	-14.9011	0.0033	0.0430246	yes	TCONS_00006683	XLOC_003473	NA	chr10:85325072-85325201	129
TCONS_00006684	gcKO	WT	70.3928	0.001	15.1032	5e-05	0.00104398	yes	TCONS_00006684	XLOC_003474	NA	chr10:85325524-85325684	160
TCONS_00006689	gcKO	WT	3.23187	5.34062	-0.724462	0.00155	0.022832	yes	TCONS_00006689	XLOC_003479	NA	chr10:86049849-86056697	6848
TCONS_00006699	gcKO	WT	641.424	0.001	18.2909	1e-04	0.00182757	yes	TCONS_00006699	XLOC_003489	NA	chr10:86147353-86147425	72
TCONS_00006701	gcKO	WT	1039.87	0.001	18.988	5e-05	0.00104398	yes	TCONS_00006701	XLOC_003491	NA	chr10:86701747-86701814	67
TCONS_00006702	gcKO	WT	1158.17	0.001	19.1434	5e-05	0.00104398	yes	TCONS_00006702	XLOC_003492	NA	chr10:87542698-87542779	81
TCONS_00006705	gcKO	WT	170.515	0.001	16.3795	5e-05	0.00104398	yes	TCONS_00006705	XLOC_003495	NA	chr10:87970004-87970128	124
TCONS_00006706	gcKO	WT	983.605	0.001	18.9077	5e-05	0.00104398	yes	TCONS_00006706	XLOC_003496	NA	chr10:88828885-88828958	73
TCONS_00006709	gcKO	WT	185.401	34.8061	2.4132	5e-05	0.00104398	yes	TCONS_00006709	XLOC_003499	NA	chr10:90644669-90644919	250
TCONS_00006711	gcKO	WT	225.811	0.001	16.7848	5e-05	0.00104398	yes	TCONS_00006711	XLOC_003501	NA	chr10:92227025-92227178	153
TCONS_00006724	gcKO	WT	346.238	0.001	17.4014	5e-05	0.00104398	yes	TCONS_00006724	XLOC_003514	NA	chr10:96088694-96088787	93
TCONS_00006725	gcKO	WT	283.689	0.001	17.114	5e-05	0.00104398	yes	TCONS_00006725	XLOC_003515	NA	chr10:96096584-96096683	99
TCONS_00006732	gcKO	WT	935.448	0.001	18.8353	5e-05	0.00104398	yes	TCONS_00006732	XLOC_003522	NA	chr10:98795645-98795726	81
TCONS_00006735	gcKO	WT	421.476	0.001	17.6851	5e-05	0.00104398	yes	TCONS_00006735	XLOC_003525	NA	chr10:103184606-103184691	85
TCONS_00006736	gcKO	WT	1045.08	0.001	18.9952	5e-05	0.00104398	yes	TCONS_00006736	XLOC_003526	NA	chr10:105899514-105899587	73
TCONS_00006738	gcKO	WT	647.203	0.001	18.3039	5e-05	0.00104398	yes	TCONS_00006738	XLOC_003528	NA	chr10:106707750-106707845	95
TCONS_00006742	gcKO	WT	0.001	221.917	-16.7597	0.00195	0.0275981	yes	TCONS_00006742	XLOC_003532	NA	chr10:110800436-110800525	89
TCONS_00006747	gcKO	WT	837.542	0.001	18.6758	1e-04	0.00182757	yes	TCONS_00006747	XLOC_003537	NA	chr10:111955967-111956033	66
TCONS_00006748	gcKO	WT	1300.81	0.001	19.311	5e-05	0.00104398	yes	TCONS_00006748	XLOC_003538	NA	chr10:114353258-114353333	75
TCONS_00006749	gcKO	WT	1831.66	0.001	19.8047	5e-05	0.00104398	yes	TCONS_00006749	XLOC_003539	NA	chr10:114393903-114393991	88
TCONS_00006751	gcKO	WT	1171.49	0.001	19.1599	5e-05	0.00104398	yes	TCONS_00006751	XLOC_003541	NA	chr10:114450465-114450526	61
TCONS_00006754	gcKO	WT	1597.49	0.001	19.6074	5e-05	0.00104398	yes	TCONS_00006754	XLOC_003544	NA	chr10:115101533-115101594	61
TCONS_00006755	gcKO	WT	2234.83	0.001	20.0917	5e-05	0.00104398	yes	TCONS_00006755	XLOC_003545	NA	chr10:115101713-115101771	58
TCONS_00006757	gcKO	WT	323.784	0.001	17.3047	5e-05	0.00104398	yes	TCONS_00006757	XLOC_003547	NA	chr10:115151187-115151300	113
TCONS_00006758	gcKO	WT	993.77	0.001	18.9226	5e-05	0.00104398	yes	TCONS_00006758	XLOC_003548	NA	chr10:115852078-115852146	68
TCONS_00006759	gcKO	WT	614.753	0.001	18.2296	1e-04	0.00182757	yes	TCONS_00006759	XLOC_003549	NA	chr10:116019559-116019632	73
TCONS_00006764	gcKO	WT	493.387	0.001	17.9124	5e-05	0.00104398	yes	TCONS_00006764	XLOC_003554	NA	chr10:116620726-116620832	106
TCONS_00006768	gcKO	WT	1120.05	0.001	19.0951	5e-05	0.00104398	yes	TCONS_00006768	XLOC_003558	NA	chr10:116896958-116897032	74
TCONS_00006771	gcKO	WT	303.149	0.001	17.2097	5e-05	0.00104398	yes	TCONS_00006771	XLOC_003561	NA	chr10:117001565-117001665	100
TCONS_00006778	gcKO	WT	879.892	0.001	18.747	5e-05	0.00104398	yes	TCONS_00006778	XLOC_003568	NA	chr10:117470533-117470600	67
TCONS_00006779	gcKO	WT	428.731	0.001	17.7097	1e-04	0.00182757	yes	TCONS_00006779	XLOC_003569	NA	chr10:118148150-118148232	82
TCONS_00006780	gcKO	WT	784.224	0.001	18.5809	1e-04	0.00182757	yes	TCONS_00006780	XLOC_003570	NA	chr10:118185511-118185580	69
TCONS_00006782	gcKO	WT	1087.7	0.001	19.0529	5e-05	0.00104398	yes	TCONS_00006782	XLOC_003572	NA	chr10:118287246-118287340	94
TCONS_00006796	gcKO	WT	50.8338	0.001	14.6335	0.00225	0.0312537	yes	TCONS_00006796	XLOC_003586	NA	chr10:120200565-120200700	135
TCONS_00006800	gcKO	WT	1639.58	0.001	19.6449	5e-05	0.00104398	yes	TCONS_00006800	XLOC_003590	NA	chr10:120466542-120466613	71
TCONS_00006801	gcKO	WT	737.704	0.001	18.4927	5e-05	0.00104398	yes	TCONS_00006801	XLOC_003591	NA	chr10:120555956-120556029	73
TCONS_00006806	gcKO	WT	1005.05	0.001	18.9388	5e-05	0.00104398	yes	TCONS_00006806	XLOC_003596	NA	chr10:122057185-122057251	66
TCONS_00006808	gcKO	WT	471.604	0.001	17.8472	5e-05	0.00104398	yes	TCONS_00006808	XLOC_003598	NA	chr10:124434301-124434383	82
TCONS_00006811	gcKO	WT	178.624	0.001	16.4466	1e-04	0.00182757	yes	TCONS_00006811	XLOC_003601	NA	chr10:124774160-124774268	108
TCONS_00006814	gcKO	WT	435.109	0.001	17.731	5e-05	0.00104398	yes	TCONS_00006814	XLOC_003604	NA	chr10:124996893-124996990	97
TCONS_00006818	gcKO	WT	764.634	0.001	18.5444	0.00235	0.032416	yes	TCONS_00006818	XLOC_003608	NA	chr10:126349215-126349273	58
TCONS_00006824	gcKO	WT	1308.98	0.001	19.32	1e-04	0.00182757	yes	TCONS_00006824	XLOC_003614	NA	chr10:127142138-127142195	57
TCONS_00006825	gcKO	WT	352.101	0.001	17.4256	5e-05	0.00104398	yes	TCONS_00006825	XLOC_003615	NA	chr10:127373783-127373873	90
TCONS_00006830	gcKO	WT	769.709	0.001	18.554	5e-05	0.00104398	yes	TCONS_00006830	XLOC_003620	NA	chr10:127813706-127813778	72
TCONS_00006834	gcKO	WT	1089.06	0.001	19.0547	5e-05	0.00104398	yes	TCONS_00006834	XLOC_003624	NA	chr10:128142307-128142393	86
TCONS_00006910	gcKO	WT	40.8778	64.1199	-0.649442	0.0016	0.0234468	yes	TCONS_00006910	XLOC_003653	Thoc5	chr11:4795345-4828868	2235
TCONS_00007006	gcKO	WT	4.95545	0.001	11.2751	0.00075	0.0120733	yes	TCONS_00007006	XLOC_003687	NA	chr11:18012318-18013071	293
TCONS_00007035	gcKO	WT	128.839	215.27	-0.740573	6e-04	0.00979359	yes	TCONS_00007035	XLOC_003700	Cct4	chr11:22890592-22903578	1966
TCONS_00007081	gcKO	WT	14.1086	24.0258	-0.767967	0.00055	0.00903315	yes	TCONS_00007081	XLOC_003718	Smek2	chr11:29072906-29120799	5108
TCONS_00007118	gcKO	WT	18.3378	36.6821	-1.00022	5e-05	0.00104398	yes	TCONS_00007118	XLOC_003732	Snrnp25	chr11:32105414-32108995	832
TCONS_00007165	gcKO	WT	6.29229	1.21603	2.37045	0.0018	0.0259656	yes	TCONS_00007165	XLOC_003759	C1qtnf2	chr11:43287807-43305027	1211
TCONS_00007231	gcKO	WT	0.001	73.726	-15.1699	0.00235	0.032416	yes	TCONS_00007231	XLOC_003785	NA	chr11:49077398-49078856	120
TCONS_00007252	gcKO	WT	5.01801	1.7393	1.52807	5e-05	0.00104398	yes	TCONS_00007252	XLOC_003804	Gfpt2	chr11:49607656-49652122	2986
TCONS_00007345	gcKO	WT	0.001	6.97711	-11.7686	5e-05	0.00104398	yes	TCONS_00007345	XLOC_003848	NA	chr11:54068859-54070407	294
TCONS_00007355	gcKO	WT	8.80007	17.6157	-1.00119	0.0018	0.0259656	yes	TCONS_00007355	XLOC_003851	Fnip1	chr11:54251680-54331840	6281
TCONS_00007486	gcKO	WT	29.5975	62.1612	-1.07051	5e-05	0.00104398	yes	TCONS_00007486	XLOC_003908	Lrrc48	chr11:60166881-60207835	1858
TCONS_00007495	gcKO	WT	13.7902	8.68173	0.667527	0.00235	0.032416	yes	TCONS_00007495	XLOC_003912	Alkbh5	chr11:60351184-60372014	6025
TCONS_00007517	gcKO	WT	61.9551	121.983	-0.977374	5e-05	0.00104398	yes	TCONS_00007517	XLOC_003924	B9d1	chr11:61318673-61326429	785
TCONS_00007550	gcKO	WT	204.595	385.878	-0.915371	1e-04	0.00182757	yes	TCONS_00007550	XLOC_003942	Cdrt4	chr11:62764694-62806597	723
TCONS_00007627	gcKO	WT	14.9756	6.1062	1.29413	0.00065	0.0105706	yes	TCONS_00007627	XLOC_003989	Sat2	chr11:69435610-69437371	882
TCONS_00007672	gcKO	WT	18.7245	10.963	0.77223	0.0036	0.0461779	yes	TCONS_00007672	XLOC_004010	Slc16a11	chr11:70027411-70029916	1756
TCONS_00007805	gcKO	WT	4.99392	1.67432	1.57602	5e-05	0.00104398	yes	TCONS_00007805	XLOC_004078	Rtn4rl1	chr11:75007494-75081264	3308
TCONS_00007839	gcKO	WT	997.709	1969.62	-0.981226	0.00085	0.0135078	yes	TCONS_00007839	XLOC_004093	Dbil5	chr11:76024072-76032303	575
TCONS_00007900	gcKO	WT	5.81296	1.75806	1.72472	0.00015	0.00268331	yes	TCONS_00007900	XLOC_004125	Slc46a1	chr11:78279202-78285447	1974
TCONS_00007969	gcKO	WT	29.8966	47.8826	-0.679502	0.0012	0.0183009	yes	TCONS_00007969	XLOC_004159	Fndc8	chr11:82705646-82714239	2081
TCONS_00008055	gcKO	WT	125.43	218.885	-0.803286	0.0033	0.0430246	yes	TCONS_00008055	XLOC_004200	Trim37	chr11:86940576-87172565	3567
TCONS_00008095	gcKO	WT	3.58681	1.76649	1.0214	0.00035	0.00592226	yes	TCONS_00008095	XLOC_004214	Vezf1	chr11:87881780-87898231	4583
TCONS_00008115	gcKO	WT	4.31099	2.12134	1.0227	5e-05	0.00104398	yes	TCONS_00008115	XLOC_004224	Trim25	chr11:88860716-88881607	5563
TCONS_00008198	gcKO	WT	7.32445	1.39859	2.38791	0.0039	0.0494037	yes	TCONS_00008198	XLOC_004258	NA	chr11:96038878-96040178	828
TCONS_00008245	gcKO	WT	6.43073	3.26318	0.978486	5e-05	0.00104398	yes	TCONS_00008245	XLOC_004289	Mllt6	chr11:97524725-97546772	7271
TCONS_00008318	gcKO	WT	135.252	227.19	-0.748245	7e-04	0.0113235	yes	TCONS_00008318	XLOC_004334	Klhl10	chr11:100303237-100318338	2012
TCONS_00008319	gcKO	WT	56.7407	97.5141	-0.781216	5e-04	0.00825634	yes	TCONS_00008319	XLOC_004335	Ttc25	chr11:100406945-100433880	2818
TCONS_00008320	gcKO	WT	5.23686	2.02026	1.37372	0.00145	0.0216237	yes	TCONS_00008320	XLOC_004336	Cnp	chr11:100436252-100443053	2333
TCONS_00008358	gcKO	WT	2.30527	1.18621	0.957986	0.00255	0.0347881	yes	TCONS_00008358	XLOC_004354	Aoc3	chr11:101191919-101200744	4396
TCONS_00008388	gcKO	WT	72.0013	167.468	-1.21778	5e-05	0.00104398	yes	TCONS_00008388	XLOC_004368	1700006E09Rik	chr11:101848369-101853578	698
TCONS_00008404	gcKO	WT	5.26214	2.71005	0.957072	0.00225	0.0312537	yes	TCONS_00008404	XLOC_004377	Grn	chr11:102291635-102298123	2333
TCONS_00008544	gcKO	WT	19.6846	50.3474	-1.35481	0.00015	0.00268331	yes	TCONS_00008544	XLOC_004440	1700096J18Rik	chr11:109208180-109214965	454
TCONS_00008588	gcKO	WT	13.0231	7.17822	0.859285	2e-04	0.00353476	yes	TCONS_00008588	XLOC_004460	Ttyh2	chr11:114536781-114582298	3456
TCONS_00008663	gcKO	WT	86327.4	31823.4	1.43973	2e-04	0.00353476	yes	TCONS_00008663	XLOC_004501	Snord1b	chr11:116532973-116537112	77
TCONS_00008697	gcKO	WT	13.128	5.87364	1.16018	5e-05	0.00104398	yes	TCONS_00008697	XLOC_004513	Syngr2	chr11:117670980-117675600	1524
TCONS_00008835	gcKO	WT	5.45612	2.07118	1.39699	0.00275	0.037096	yes	TCONS_00008835	XLOC_004586	Tug1	chr11:3539796-3549385	6964
TCONS_00008933	gcKO	WT	88.9845	35.0937	1.34232	5e-05	0.00104398	yes	TCONS_00008933	XLOC_004623	Gm11974	chr11:6425593-6428763	618
TCONS_00008941	gcKO	WT	7.6375	19.1717	-1.32769	0.0025	0.0342118	yes	TCONS_00008941	XLOC_004628	Gm11978	chr11:6550044-6577478	1367
TCONS_00008946	gcKO	WT	5.51359	2.21447	1.31564	0.00345	0.0447452	yes	TCONS_00008946	XLOC_004629	Gm11981	chr11:6609278-6620074	3510
TCONS_00008950	gcKO	WT	5.86602	1.21606	2.26923	5e-05	0.00104398	yes	TCONS_00008950	XLOC_004632	Igfbp3	chr11:7106095-7113926	2440
TCONS_00008951	gcKO	WT	5.78259	3.09439	0.901844	2e-04	0.00353476	yes	TCONS_00008951	XLOC_004633	Tns3	chr11:8331654-8564538	7483
TCONS_00009090	gcKO	WT	3.00022	0.001	10.5513	0.0021	0.0294586	yes	TCONS_00009090	XLOC_004690	NA	chr11:31702339-31703200	319
TCONS_00009101	gcKO	WT	90.8417	158.589	-0.803859	5e-05	0.00104398	yes	TCONS_00009101	XLOC_004696	Efcab9	chr11:32422732-32427574	767
TCONS_00009145	gcKO	WT	3.81513	1.78819	1.0928	0.00105	0.016314	yes	TCONS_00009145	XLOC_004713	Wwc1	chr11:35652679-35793591	3315
TCONS_00009151	gcKO	WT	4.10052	6.95985	-0.763105	0.0024	0.0329911	yes	TCONS_00009151	XLOC_004718	Hmmr	chr11:40514889-40546939	3914
TCONS_00009169	gcKO	WT	5.03514	9	-0.837767	0.002	0.0281652	yes	TCONS_00009169	XLOC_004729	Ublcp1	chr11:44268072-44284050	2138
TCONS_00009261	gcKO	WT	801.813	0.001	18.6129	5e-05	0.00104398	yes	TCONS_00009261	XLOC_004775	NA	chr11:51675844-51679797	81
TCONS_00009301	gcKO	WT	20.4896	11.5026	0.832877	0.00015	0.00268331	yes	TCONS_00009301	XLOC_004801	Cdc42se2	chr11:54530916-54601205	3138
TCONS_00009330	gcKO	WT	157.848	89.7713	0.814203	0.00025	0.00433359	yes	TCONS_00009330	XLOC_004810	Sparc	chr11:55207998-55233654	2299
TCONS_00009372	gcKO	WT	81.8504	132.282	-0.692549	0.00175	0.0253456	yes	TCONS_00009372	XLOC_004824	4930504O13Rik	chr11:58259644-58266468	598
TCONS_00009387	gcKO	WT	16.6673	34.1222	-1.03365	5e-05	0.00104398	yes	TCONS_00009387	XLOC_004837	Zfp39	chr11:58701632-58717727	3890
TCONS_00009478	gcKO	WT	11.4728	3.9381	1.54241	0.00385	0.0489108	yes	TCONS_00009478	XLOC_004869	Gm16515	chr11:60715747-60745369	4004
TCONS_00009557	gcKO	WT	5.76317	3.34641	0.784068	0.0019	0.0272203	yes	TCONS_00009557	XLOC_004897	Map2k4	chr11:65501745-65601799	3694
TCONS_00009614	gcKO	WT	2.88185	0.576632	2.31927	0.00265	0.0359424	yes	TCONS_00009614	XLOC_004924	Atp1b2	chr11:69413229-69419855	3373
TCONS_00009615	gcKO	WT	12.5471	3.26819	1.94046	5e-05	0.00104398	yes	TCONS_00009615	XLOC_004924	Atp1b2	chr11:69413229-69419855	2959
TCONS_00009617	gcKO	WT	14.4758	3.92781	1.88158	5e-05	0.00104398	yes	TCONS_00009617	XLOC_004925	Shbg	chr11:69427983-69431604	1407
TCONS_00009645	gcKO	WT	269.617	455.921	-0.75787	0.00065	0.0105706	yes	TCONS_00009645	XLOC_004939	Spem1	chr11:69634372-69635667	1031
TCONS_00009759	gcKO	WT	145.129	248.613	-0.776562	0.00025	0.00433359	yes	TCONS_00009759	XLOC_004979	Tekt1	chr11:72158221-72175382	1406
TCONS_00009816	gcKO	WT	46.1316	73.1301	-0.664698	0.0028	0.0376809	yes	TCONS_00009816	XLOC_005014	Rpa1	chr11:75113760-75161885	3043
TCONS_00009976	gcKO	WT	4.73642	2.35937	1.00509	0.0017	0.0247116	yes	TCONS_00009976	XLOC_005098	Mrm1	chr11:84626562-84633017	2477
TCONS_00010021	gcKO	WT	2.12875	1.09441	0.959213	0.0034	0.0441689	yes	TCONS_00010021	XLOC_005119	Ypel2	chr11:86749926-86807264	4902
TCONS_00010022	gcKO	WT	31.3983	53.3723	-0.765386	0.00015	0.00268331	yes	TCONS_00010022	XLOC_005120	Gdpd1	chr11:86847295-86887639	2484
TCONS_00010108	gcKO	WT	5.72352	2.26912	1.33439	5e-05	0.00104398	yes	TCONS_00010108	XLOC_005161	Xylt2	chr11:94525160-94538807	3424
TCONS_00010131	gcKO	WT	3.7206	1.28332	1.53492	0.00215	0.0300538	yes	TCONS_00010131	XLOC_005171	Nxph3	chr11:95371159-95375879	2093
TCONS_00010139	gcKO	WT	26.2204	50.0647	-0.933078	0.00045	0.00749931	yes	TCONS_00010139	XLOC_005175	Abi3	chr11:95685813-95707045	1978
TCONS_00010196	gcKO	WT	68.0736	109.172	-0.681428	0.00185	0.0265711	yes	TCONS_00010196	XLOC_005202	1700001P01Rik	chr11:97632794-97637232	624
TCONS_00010326	gcKO	WT	18.8091	30.0993	-0.67827	0.00195	0.0275981	yes	TCONS_00010326	XLOC_005287	Dhx58	chr11:100556197-100565585	2412
TCONS_00010341	gcKO	WT	8.89264	4.61985	0.944616	0.00015	0.00268331	yes	TCONS_00010341	XLOC_005295	Ptrf	chr11:100818050-100831931	3217
TCONS_00010419	gcKO	WT	4.02968	2.07131	0.959783	3e-04	0.00513973	yes	TCONS_00010419	XLOC_005339	Map3k14	chr11:103081077-103128715	4173
TCONS_00010527	gcKO	WT	116.663	190.999	-0.711213	0.00095	0.0149297	yes	TCONS_00010527	XLOC_005388	1700012B07Rik	chr11:109649604-109689360	939
TCONS_00010534	gcKO	WT	2.60174	1.28929	1.01234	0.00385	0.0489108	yes	TCONS_00010534	XLOC_005392	Abca6	chr11:110038135-110113090	5238
TCONS_00010634	gcKO	WT	4.45486	1.9907	1.1617	0.00095	0.0149297	yes	TCONS_00010634	XLOC_005434	Grb2	chr11:115505457-115569911	2610
TCONS_00010648	gcKO	WT	7.23155	2.25532	1.68053	7e-04	0.0113235	yes	TCONS_00010648	XLOC_005441	Trim47	chr11:115967063-115971549	2192
TCONS_00010708	gcKO	WT	6.35294	2.7842	1.18987	5e-05	0.00104398	yes	TCONS_00010708	XLOC_005462	Tmc6	chr11:117627298-117641997	2912
TCONS_00010829	gcKO	WT	19.3442	12.1785	0.667521	0.00315	0.0417543	yes	TCONS_00010829	XLOC_005513	Fasn	chr11:120667271-120685861	9938
TCONS_00010861	gcKO	WT	922.129	0.001	18.8146	5e-05	0.00104398	yes	TCONS_00010861	XLOC_005530	NA	chr11:3953886-3953959	73
TCONS_00010862	gcKO	WT	979.202	0.001	18.9012	5e-05	0.00104398	yes	TCONS_00010862	XLOC_005531	NA	chr11:4178230-4178300	70
TCONS_00010866	gcKO	WT	932.936	0.001	18.8314	5e-05	0.00104398	yes	TCONS_00010866	XLOC_005535	NA	chr11:5986083-5986180	97
TCONS_00010867	gcKO	WT	644.45	0.001	18.2977	5e-05	0.00104398	yes	TCONS_00010867	XLOC_005536	NA	chr11:6001303-6001405	102
TCONS_00010868	gcKO	WT	421.476	0.001	17.6851	5e-05	0.00104398	yes	TCONS_00010868	XLOC_005537	NA	chr11:6314869-6314954	85
TCONS_00010869	gcKO	WT	1157.54	0.001	19.1426	5e-05	0.00104398	yes	TCONS_00010869	XLOC_005538	NA	chr11:6839796-6839876	80
TCONS_00010870	gcKO	WT	1149.48	0.001	19.1326	5e-05	0.00104398	yes	TCONS_00010870	XLOC_005539	NA	chr11:7136361-7136446	85
TCONS_00010871	gcKO	WT	1900.08	0.001	19.8576	5e-05	0.00104398	yes	TCONS_00010871	XLOC_005540	NA	chr11:8726096-8726172	76
TCONS_00010873	gcKO	WT	529.633	0.001	18.0146	5e-05	0.00104398	yes	TCONS_00010873	XLOC_005542	NA	chr11:9870366-9870445	79
TCONS_00010874	gcKO	WT	886.899	0.001	18.7584	5e-05	0.00104398	yes	TCONS_00010874	XLOC_005543	NA	chr11:9880500-9880601	101
TCONS_00010876	gcKO	WT	1192.89	0.001	19.186	5e-05	0.00104398	yes	TCONS_00010876	XLOC_005545	NA	chr11:11508391-11508475	84
TCONS_00010877	gcKO	WT	579.087	0.001	18.1434	5e-05	0.00104398	yes	TCONS_00010877	XLOC_005546	NA	chr11:11948835-11948916	81
TCONS_00010878	gcKO	WT	1365.73	0.001	19.3812	5e-05	0.00104398	yes	TCONS_00010878	XLOC_005547	NA	chr11:11954887-11954945	58
TCONS_00010879	gcKO	WT	503.617	0.001	17.942	5e-05	0.00104398	yes	TCONS_00010879	XLOC_005548	NA	chr11:11971610-11971710	100
TCONS_00010880	gcKO	WT	1381.33	0.001	19.3976	1e-04	0.00182757	yes	TCONS_00010880	XLOC_005549	NA	chr11:12744303-12744359	56
TCONS_00010881	gcKO	WT	327.861	0.001	17.3227	0.00025	0.00433359	yes	TCONS_00010881	XLOC_005550	NA	chr11:12897975-12898065	90
TCONS_00010886	gcKO	WT	1840.1	0.001	19.8114	5e-05	0.00104398	yes	TCONS_00010886	XLOC_005555	NA	chr11:17438041-17438105	64
TCONS_00010887	gcKO	WT	1296.55	0.001	19.3062	5e-05	0.00104398	yes	TCONS_00010887	XLOC_005556	NA	chr11:17997782-17997841	59
TCONS_00010891	gcKO	WT	471.604	0.001	17.8472	5e-05	0.00104398	yes	TCONS_00010891	XLOC_005560	NA	chr11:19264561-19264643	82
TCONS_00010912	gcKO	WT	454504	991261	-1.12497	5e-05	0.00104398	yes	TCONS_00010912	XLOC_005581	NA	chr11:26186046-26186076	30
TCONS_00010914	gcKO	WT	1925.93	0.001	19.8771	5e-05	0.00104398	yes	TCONS_00010914	XLOC_005583	NA	chr11:26856791-26856870	79
TCONS_00010918	gcKO	WT	377.637	0.001	17.5266	5e-05	0.00104398	yes	TCONS_00010918	XLOC_005587	NA	chr11:28633961-28634073	112
TCONS_00010919	gcKO	WT	1078.67	0.001	19.0408	5e-05	0.00104398	yes	TCONS_00010919	XLOC_005588	NA	chr11:29589173-29589268	95
TCONS_00010920	gcKO	WT	701.271	0.001	18.4196	5e-05	0.00104398	yes	TCONS_00010920	XLOC_005589	NA	chr11:30126608-30126686	78
TCONS_00010921	gcKO	WT	1237.95	0.001	19.2395	5e-05	0.00104398	yes	TCONS_00010921	XLOC_005590	NA	chr11:30294760-30294834	74
TCONS_00010922	gcKO	WT	601.089	0.001	18.1972	5e-05	0.00104398	yes	TCONS_00010922	XLOC_005591	NA	chr11:30799798-30799876	78
TCONS_00010926	gcKO	WT	920.052	0.001	18.8114	1e-04	0.00182757	yes	TCONS_00010926	XLOC_005595	NA	chr11:31302818-31302882	64
TCONS_00010927	gcKO	WT	0.001	22.0949	-13.4315	0.0033	0.0430246	yes	TCONS_00010927	XLOC_005596	NA	chr11:31343697-31343872	175
TCONS_00010929	gcKO	WT	993.77	0.001	18.9226	5e-05	0.00104398	yes	TCONS_00010929	XLOC_005598	NA	chr11:31429995-31430063	68
TCONS_00010930	gcKO	WT	1277.99	0.001	19.2854	5e-05	0.00104398	yes	TCONS_00010930	XLOC_005599	NA	chr11:31491568-31491629	61
TCONS_00010932	gcKO	WT	0.001	1092.91	-19.0597	0.00195	0.0275981	yes	TCONS_00010932	XLOC_005601	NA	chr11:31647910-31647963	53
TCONS_00010937	gcKO	WT	1040.39	0.001	18.9887	5e-05	0.00104398	yes	TCONS_00010937	XLOC_005606	NA	chr11:32819733-32819797	64
TCONS_00010941	gcKO	WT	1138.34	0.001	19.1185	5e-05	0.00104398	yes	TCONS_00010941	XLOC_005610	NA	chr11:33440576-33440647	71
TCONS_00010944	gcKO	WT	1039.87	0.001	18.988	5e-05	0.00104398	yes	TCONS_00010944	XLOC_005613	NA	chr11:34698171-34698238	67
TCONS_00010949	gcKO	WT	0.001	413.747	-17.6584	5e-05	0.00104398	yes	TCONS_00010949	XLOC_005618	NA	chr11:37022881-37022972	91
TCONS_00010950	gcKO	WT	757.267	0.001	18.5304	5e-05	0.00104398	yes	TCONS_00010950	XLOC_005619	NA	chr11:37424232-37424313	81
TCONS_00010952	gcKO	WT	1146.66	0.001	19.129	5e-05	0.00104398	yes	TCONS_00010952	XLOC_005621	NA	chr11:37803023-37803091	68
TCONS_00010954	gcKO	WT	715.732	0.001	18.4491	5e-05	0.00104398	yes	TCONS_00010954	XLOC_005623	NA	chr11:39083257-39083341	84
TCONS_00010955	gcKO	WT	589.5	0.001	18.1691	1e-04	0.00182757	yes	TCONS_00010955	XLOC_005624	NA	chr11:39098657-39098731	74
TCONS_00010959	gcKO	WT	1916.99	0.001	19.8704	5e-05	0.00104398	yes	TCONS_00010959	XLOC_005628	NA	chr11:42955638-42955699	61
TCONS_00010961	gcKO	WT	752.625	0.001	18.5216	5e-05	0.00104398	yes	TCONS_00010961	XLOC_005630	NA	chr11:43094218-43094291	73
TCONS_00010963	gcKO	WT	184.728	0.001	16.4951	5e-05	0.00104398	yes	TCONS_00010963	XLOC_005632	NA	chr11:43167670-43167800	130
TCONS_00010965	gcKO	WT	0.001	718.388	-18.4544	0.0012	0.0183009	yes	TCONS_00010965	XLOC_005634	NA	chr11:43711699-43711763	64
TCONS_00010968	gcKO	WT	283.406	0.001	17.1125	1e-04	0.00182757	yes	TCONS_00010968	XLOC_005637	NA	chr11:45840037-45840131	94
TCONS_00010969	gcKO	WT	757.267	0.001	18.5304	5e-05	0.00104398	yes	TCONS_00010969	XLOC_005638	NA	chr11:46261998-46262079	81
TCONS_00010971	gcKO	WT	530.529	0.001	18.0171	5e-05	0.00104398	yes	TCONS_00010971	XLOC_005640	NA	chr11:47713817-47713906	89
TCONS_00010972	gcKO	WT	465.915	0.001	17.8297	5e-05	0.00104398	yes	TCONS_00010972	XLOC_005641	NA	chr11:47795722-47795837	115
TCONS_00010973	gcKO	WT	1065	0.001	19.0224	1e-04	0.00182757	yes	TCONS_00010973	XLOC_005642	NA	chr11:48500997-48501058	61
TCONS_00010982	gcKO	WT	962162	1.70145e+06	-0.822413	6e-04	0.00979359	yes	TCONS_00010982	XLOC_005651	NA	chr11:49823587-49823612	25
TCONS_00010985	gcKO	WT	942.384	0.001	18.846	0.00025	0.00433359	yes	TCONS_00010985	XLOC_005654	NA	chr11:50038595-50038659	64
TCONS_00010987	gcKO	WT	334.677	0.001	17.3524	5e-05	0.00104398	yes	TCONS_00010987	XLOC_005656	NA	chr11:50067029-50067123	94
TCONS_00010989	gcKO	WT	27.2839	77.0685	-1.49806	0.00115	0.0176741	yes	TCONS_00010989	XLOC_005658	NA	chr11:50150528-50150842	314
TCONS_00010990	gcKO	WT	1678.77	0.001	19.679	5e-05	0.00104398	yes	TCONS_00010990	XLOC_005659	NA	chr11:50155473-50155532	59
TCONS_00010998	gcKO	WT	769.374	0.001	18.5533	5e-05	0.00104398	yes	TCONS_00010998	XLOC_005667	NA	chr11:52505596-52505666	70
TCONS_00011000	gcKO	WT	0.001	247.199	-16.9153	0.00195	0.0275981	yes	TCONS_00011000	XLOC_005669	NA	chr11:53239375-53239461	86
TCONS_00011001	gcKO	WT	0.001	66.9688	-15.0312	0.0012	0.0183009	yes	TCONS_00011001	XLOC_005670	NA	chr11:53887681-53887816	135
TCONS_00011003	gcKO	WT	10895.6	0.001	22.3772	0.0011	0.016978	yes	TCONS_00011003	XLOC_005672	NA	chr11:54083053-54083080	27
TCONS_00011008	gcKO	WT	1343.66	0.001	19.3577	5e-05	0.00104398	yes	TCONS_00011008	XLOC_005677	NA	chr11:55508412-55508504	92
TCONS_00011021	gcKO	WT	26.3369	11.2454	1.22768	8e-04	0.012821	yes	TCONS_00011021	XLOC_005690	NA	chr11:58115909-58116506	597
TCONS_00011023	gcKO	WT	339.071	0.001	17.3712	5e-05	0.00104398	yes	TCONS_00011023	XLOC_005692	NA	chr11:58616487-58616583	96
TCONS_00011033	gcKO	WT	210.491	0.001	16.6834	5e-05	0.00104398	yes	TCONS_00011033	XLOC_005702	NA	chr11:61672840-61672966	126
TCONS_00011037	gcKO	WT	471.604	0.001	17.8472	5e-05	0.00104398	yes	TCONS_00011037	XLOC_005706	NA	chr11:62369286-62369368	82
TCONS_00011039	gcKO	WT	3297.57	0.001	20.653	5e-05	0.00104398	yes	TCONS_00011039	XLOC_005708	NA	chr11:62555595-62555642	47
TCONS_00011047	gcKO	WT	1178.69	0.001	19.1688	1e-04	0.00182757	yes	TCONS_00011047	XLOC_005716	NA	chr11:64986694-64986753	59
TCONS_00011048	gcKO	WT	1272.26	0.001	19.279	5e-05	0.00104398	yes	TCONS_00011048	XLOC_005717	NA	chr11:66555404-66555475	71
TCONS_00011049	gcKO	WT	886.296	0.001	18.7574	5e-05	0.00104398	yes	TCONS_00011049	XLOC_005718	NA	chr11:68378414-68378491	77
TCONS_00011050	gcKO	WT	770.375	0.001	18.5552	5e-05	0.00104398	yes	TCONS_00011050	XLOC_005719	NA	chr11:68780481-68780560	79
TCONS_00011057	gcKO	WT	500.908	0.001	17.9342	1e-04	0.00182757	yes	TCONS_00011057	XLOC_005726	NA	chr11:69185513-69185591	78
TCONS_00011058	gcKO	WT	59.7189	0.001	14.8659	5e-05	0.00104398	yes	TCONS_00011058	XLOC_005727	NA	chr11:69185704-69185885	181
TCONS_00011065	gcKO	WT	644.759	0.001	18.2984	0.0011	0.016978	yes	TCONS_00011065	XLOC_005734	NA	chr11:70191157-70191223	66
TCONS_00011066	gcKO	WT	0.001	920.334	-18.8118	0.0012	0.0183009	yes	TCONS_00011066	XLOC_005735	NA	chr11:70264588-70264647	59
TCONS_00011067	gcKO	WT	471.604	0.001	17.8472	5e-05	0.00104398	yes	TCONS_00011067	XLOC_005736	NA	chr11:70547699-70547781	82
TCONS_00011072	gcKO	WT	1119.94	0.001	19.095	1e-04	0.00182757	yes	TCONS_00011072	XLOC_005741	NA	chr11:71704675-71704735	60
TCONS_00011083	gcKO	WT	1697.06	0.001	19.6946	5e-05	0.00104398	yes	TCONS_00011083	XLOC_005752	NA	chr11:72183459-72183513	54
TCONS_00011085	gcKO	WT	1296.55	0.001	19.3062	5e-05	0.00104398	yes	TCONS_00011085	XLOC_005754	NA	chr11:72393973-72394032	59
TCONS_00011086	gcKO	WT	854.835	0.001	18.7053	5e-05	0.00104398	yes	TCONS_00011086	XLOC_005755	NA	chr11:72501994-72502081	87
TCONS_00011087	gcKO	WT	307.402	521.648	-0.762948	0.00095	0.0149297	yes	TCONS_00011087	XLOC_005756	NA	chr11:73585426-73585687	261
TCONS_00011093	gcKO	WT	2387.93	0.001	20.1873	5e-05	0.00104398	yes	TCONS_00011093	XLOC_005762	NA	chr11:75005585-75005642	57
TCONS_00011095	gcKO	WT	920.052	0.001	18.8114	1e-04	0.00182757	yes	TCONS_00011095	XLOC_005764	NA	chr11:75098293-75098357	64
TCONS_00011101	gcKO	WT	678.685	0.001	18.3724	5e-05	0.00104398	yes	TCONS_00011101	XLOC_005770	NA	chr11:78561382-78561457	75
TCONS_00011102	gcKO	WT	423.4	0.001	17.6917	5e-05	0.00104398	yes	TCONS_00011102	XLOC_005771	NA	chr11:78621094-78621201	107
TCONS_00011104	gcKO	WT	307.329	0.001	17.2294	5e-05	0.00104398	yes	TCONS_00011104	XLOC_005773	NA	chr11:78996134-78996233	99
TCONS_00011113	gcKO	WT	1455.92	0.001	19.4735	5e-05	0.00104398	yes	TCONS_00011113	XLOC_005782	NA	chr11:81997298-81997358	60
TCONS_00011118	gcKO	WT	1189.03	0.001	19.1814	5e-05	0.00104398	yes	TCONS_00011118	XLOC_005787	NA	chr11:84490598-84490668	70
TCONS_00011129	gcKO	WT	1187.79	0.001	19.1799	5e-05	0.00104398	yes	TCONS_00011129	XLOC_005798	NA	chr11:88687964-88688049	85
TCONS_00011130	gcKO	WT	613.162	0.001	18.2259	5e-05	0.00104398	yes	TCONS_00011130	XLOC_005799	NA	chr11:88742715-88742795	80
TCONS_00011140	gcKO	WT	1730.41	0.001	19.7227	1e-04	0.00182757	yes	TCONS_00011140	XLOC_005809	NA	chr11:92014599-92014651	52
TCONS_00011142	gcKO	WT	0.001	1795.97	-19.7763	5e-05	0.00104398	yes	TCONS_00011142	XLOC_005811	NA	chr11:93990314-93990378	64
TCONS_00011143	gcKO	WT	1205.3	0.001	19.201	5e-05	0.00104398	yes	TCONS_00011143	XLOC_005812	NA	chr11:93997612-93997683	71
TCONS_00011151	gcKO	WT	528.074	0.001	18.0104	5e-05	0.00104398	yes	TCONS_00011151	XLOC_005820	NA	chr11:95121819-95121901	82
TCONS_00011155	gcKO	WT	705.745	0.001	18.4288	5e-05	0.00104398	yes	TCONS_00011155	XLOC_005824	NA	chr11:95684562-95684638	76
TCONS_00011158	gcKO	WT	1265.46	0.001	19.2712	5e-05	0.00104398	yes	TCONS_00011158	XLOC_005827	NA	chr11:95931769-95931831	62
TCONS_00011159	gcKO	WT	550.316	0.001	18.0699	5e-05	0.00104398	yes	TCONS_00011159	XLOC_005828	NA	chr11:96640531-96640637	106
TCONS_00011162	gcKO	WT	450.744	0.001	17.782	5e-05	0.00104398	yes	TCONS_00011162	XLOC_005831	NA	chr11:97053261-97053370	109
TCONS_00011164	gcKO	WT	384.11	0.001	17.5512	5e-05	0.00104398	yes	TCONS_00011164	XLOC_005833	NA	chr11:97219112-97219202	90
TCONS_00011169	gcKO	WT	1375.99	0.001	19.392	5e-05	0.00104398	yes	TCONS_00011169	XLOC_005838	NA	chr11:98140993-98141061	68
TCONS_00011173	gcKO	WT	406.292	0.001	17.6322	5e-05	0.00104398	yes	TCONS_00011173	XLOC_005842	NA	chr11:98994727-98994813	86
TCONS_00011174	gcKO	WT	321.035	0.001	17.2924	5e-05	0.00104398	yes	TCONS_00011174	XLOC_005843	NA	chr11:100534869-100534994	125
TCONS_00011176	gcKO	WT	624.537	0.001	18.2524	5e-05	0.00104398	yes	TCONS_00011176	XLOC_005845	NA	chr11:101114657-101114760	103
TCONS_00011179	gcKO	WT	1106.55	0.001	19.0776	5e-05	0.00104398	yes	TCONS_00011179	XLOC_005848	NA	chr11:102000472-102000545	73
TCONS_00011184	gcKO	WT	921.296	0.001	18.8133	5e-05	0.00104398	yes	TCONS_00011184	XLOC_005853	NA	chr11:103283915-103283981	66
TCONS_00011192	gcKO	WT	1238.41	0.001	19.2401	5e-05	0.00104398	yes	TCONS_00011192	XLOC_005861	NA	chr11:103510616-103510699	83
TCONS_00011200	gcKO	WT	977.185	0.001	18.8983	5e-05	0.00104398	yes	TCONS_00011200	XLOC_005869	NA	chr11:104359894-104359970	76
TCONS_00011203	gcKO	WT	897.993	0.001	18.7763	5e-05	0.00104398	yes	TCONS_00011203	XLOC_005872	NA	chr11:104953049-104953121	72
TCONS_00011210	gcKO	WT	4.60677	2.48414	0.890742	0.0024	0.0329911	yes	TCONS_00011210	XLOC_005879	NA	chr11:107551892-107555078	3186
TCONS_00011231	gcKO	WT	1272.26	0.001	19.279	5e-05	0.00104398	yes	TCONS_00011231	XLOC_005900	NA	chr11:110419363-110419434	71
TCONS_00011232	gcKO	WT	728.332	0.001	18.4742	5e-05	0.00104398	yes	TCONS_00011232	XLOC_005901	NA	chr11:110460245-110460338	93
TCONS_00011236	gcKO	WT	358.312	0.001	17.4509	5e-05	0.00104398	yes	TCONS_00011236	XLOC_005905	NA	chr11:111762130-111762222	92
TCONS_00011238	gcKO	WT	1473.75	0.001	19.4911	5e-05	0.00104398	yes	TCONS_00011238	XLOC_005907	NA	chr11:112635652-112635726	74
TCONS_00011243	gcKO	WT	1131.14	0.001	19.1093	5e-05	0.00104398	yes	TCONS_00011243	XLOC_005912	NA	chr11:113501072-113501147	75
TCONS_00011251	gcKO	WT	194.125	0.001	16.5666	5e-05	0.00104398	yes	TCONS_00011251	XLOC_005920	NA	chr11:114119215-114119355	140
TCONS_00011260	gcKO	WT	1196.07	0.001	19.1899	5e-05	0.00104398	yes	TCONS_00011260	XLOC_005929	NA	chr11:117394542-117394606	64
TCONS_00011264	gcKO	WT	927.312	0.001	18.8227	5e-05	0.00104398	yes	TCONS_00011264	XLOC_005933	NA	chr11:117720675-117720766	91
TCONS_00011268	gcKO	WT	1140.79	0.001	19.1216	5e-05	0.00104398	yes	TCONS_00011268	XLOC_005937	NA	chr11:119164300-119164365	65
TCONS_00011269	gcKO	WT	833.851	0.001	18.6694	5e-05	0.00104398	yes	TCONS_00011269	XLOC_005938	NA	chr11:119251516-119251588	72
TCONS_00011272	gcKO	WT	529.905	0.001	18.0154	5e-05	0.00104398	yes	TCONS_00011272	XLOC_005941	NA	chr11:119294162-119294256	94
TCONS_00011273	gcKO	WT	1439.88	0.001	19.4575	5e-05	0.00104398	yes	TCONS_00011273	XLOC_005942	NA	chr11:119319417-119319474	57
TCONS_00011277	gcKO	WT	2073.81	0.001	19.9839	1e-04	0.00182757	yes	TCONS_00011277	XLOC_005946	NA	chr11:119763004-119763053	49
TCONS_00011287	gcKO	WT	1459.08	0.001	19.4766	1e-04	0.00182757	yes	TCONS_00011287	XLOC_005956	NA	chr11:120855202-120855257	55
TCONS_00011290	gcKO	WT	1835.94	0.001	19.8081	1e-04	0.00182757	yes	TCONS_00011290	XLOC_005959	NA	chr11:120874435-120874488	53
TCONS_00011359	gcKO	WT	5.91415	0.001	11.5302	3e-04	0.00513973	yes	TCONS_00011359	XLOC_005984	NA	chr12:5566392-5569467	279
TCONS_00011416	gcKO	WT	1389.11	0.001	19.4057	5e-05	0.00104398	yes	TCONS_00011416	XLOC_006012	NA	chr12:15575028-15593192	87
TCONS_00011418	gcKO	WT	6.92241	0.001	11.7573	5e-05	0.00104398	yes	TCONS_00011418	XLOC_006014	NA	chr12:15839453-15842832	482
TCONS_00011448	gcKO	WT	10.4297	29.1225	-1.48135	5e-05	0.00104398	yes	TCONS_00011448	XLOC_006032	Taf1b	chr12:25183445-25243436	2019
TCONS_00011510	gcKO	WT	74.0835	115.911	-0.645786	0.00265	0.0359424	yes	TCONS_00011510	XLOC_006062	Efcab10	chr12:34079718-34086134	675
TCONS_00011516	gcKO	WT	44.0823	125.139	-1.50524	5e-05	0.00104398	yes	TCONS_00011516	XLOC_006066	Prps1l1	chr12:35669432-35671108	1676
TCONS_00011545	gcKO	WT	11.8796	25.1812	-1.0838	0.0016	0.0234468	yes	TCONS_00011545	XLOC_006082	Immp2l	chr12:41750676-43056573	1145
TCONS_00011550	gcKO	WT	8.85039	17.9667	-1.02143	0.00015	0.00268331	yes	TCONS_00011550	XLOC_006084	Pnpla8	chr12:45370137-45414422	4404
TCONS_00011607	gcKO	WT	3.03576	0.001	10.5683	0.0014	0.0209805	yes	TCONS_00011607	XLOC_006114	NA	chr12:57721349-57726488	329
TCONS_00011643	gcKO	WT	29.8206	54.1348	-0.860225	5e-05	0.00104398	yes	TCONS_00011643	XLOC_006129	Wdr20b	chr12:66326503-66329441	2228
TCONS_00011646	gcKO	WT	18.9479	8.4911	1.15792	0.0039	0.0494037	yes	TCONS_00011646	XLOC_006132	Lrr1	chr12:70269800-70279997	779
TCONS_00011657	gcKO	WT	7.42552	16.2126	-1.12645	0.0025	0.0342118	yes	TCONS_00011657	XLOC_006138	Atp5s	chr12:70825948-70845729	1485
TCONS_00011739	gcKO	WT	7.47654	0.862372	3.11451	5e-05	0.00104398	yes	TCONS_00011739	XLOC_006171	Akap5	chr12:77425877-77435138	6685
TCONS_00011743	gcKO	WT	53.5062	96.6882	-0.853622	5e-05	0.00104398	yes	TCONS_00011743	XLOC_006174	Ppp1r36	chr12:77518585-77540478	1453
TCONS_00011745	gcKO	WT	2.68783	1.30864	1.03781	0.00075	0.0120733	yes	TCONS_00011745	XLOC_006176	Plekhg3	chr12:77634546-77680026	4955
TCONS_00011748	gcKO	WT	8.04138	3.67564	1.12923	1e-04	0.00182757	yes	TCONS_00011748	XLOC_006178	Fntb	chr12:77938453-78022399	2560
TCONS_00011914	gcKO	WT	0.635516	7.80846	-3.61695	5e-05	0.00104398	yes	TCONS_00011914	XLOC_006242	Fos	chr12:86814850-86818219	2093
TCONS_00011926	gcKO	WT	68.7577	108.666	-0.6603	0.0018	0.0259656	yes	TCONS_00011926	XLOC_006248	Ift43	chr12:87423510-87503409	809
TCONS_00012060	gcKO	WT	36.9236	63.2689	-0.776937	0.00025	0.00433359	yes	TCONS_00012060	XLOC_006300	Ubr7	chr12:103996184-104015911	3247
TCONS_00012070	gcKO	WT	62.3554	118.415	-0.925254	0.00085	0.0135078	yes	TCONS_00012070	XLOC_006304	Otub2	chr12:104615103-104644574	2031
TCONS_00012085	gcKO	WT	74.8661	28.3126	1.40284	5e-05	0.00104398	yes	TCONS_00012085	XLOC_006308	Serpina5	chr12:105339322-105344347	2162
TCONS_00012105	gcKO	WT	5.15743	1.34654	1.9366	2e-04	0.00353476	yes	TCONS_00012105	XLOC_006316	Serpina3n	chr12:105644917-105652539	2085
TCONS_00012215	gcKO	WT	141.845	0.001	16.114	0.0033	0.0430246	yes	TCONS_00012215	XLOC_006381	Mir666	chr12:110955294-110955393	99
TCONS_00012308	gcKO	WT	15.0307	7.77681	0.950572	0.00085	0.0135078	yes	TCONS_00012308	XLOC_006427	Zfyve21	chr12:113052380-113066599	1310
TCONS_00012328	gcKO	WT	13.6379	8.29955	0.716448	3e-04	0.00513973	yes	TCONS_00012328	XLOC_006439	Cep170b	chr12:113960384-113984802	6640
TCONS_00012355	gcKO	WT	14.9094	26.0398	-0.804455	1e-04	0.00182757	yes	TCONS_00012355	XLOC_006449	Adam6b	chr12:114727775-114730046	2271
TCONS_00012357	gcKO	WT	485.416	0.001	17.8889	5e-05	0.00104398	yes	TCONS_00012357	XLOC_006451	NA	chr12:115910646-115911822	109
TCONS_00012474	gcKO	WT	2.12989	8.5862	-2.01073	5e-05	0.00104398	yes	TCONS_00012474	XLOC_006506	1700030C10Rik	chr12:20810252-20821640	1724
TCONS_00012475	gcKO	WT	21.0331	101.032	-2.26402	1e-04	0.00182757	yes	TCONS_00012475	XLOC_006507	Itgb1bp1	chr12:21117616-21320917	910
TCONS_00012517	gcKO	WT	22.0126	80.2387	-1.86592	0.00255	0.0347881	yes	TCONS_00012517	XLOC_006522	Allc	chr12:29238449-29267414	1588
TCONS_00012643	gcKO	WT	6.00043	3.41383	0.813493	0.00265	0.0359424	yes	TCONS_00012643	XLOC_006575	Heatr5a	chr12:52976859-53072308	7761
TCONS_00012660	gcKO	WT	29.1899	48.7292	-0.739297	0.0022	0.0306664	yes	TCONS_00012660	XLOC_006584	Eapp	chr12:55774088-55796875	1043
TCONS_00012674	gcKO	WT	14.7838	7.98252	0.889018	0.00085	0.0135078	yes	TCONS_00012674	XLOC_006590	Nfkbia	chr12:56590395-56593634	1579
TCONS_00012694	gcKO	WT	18.5749	40.5102	-1.12489	5e-05	0.00104398	yes	TCONS_00012694	XLOC_006599	Sec23a	chr12:60059370-60113026	4108
TCONS_00012768	gcKO	WT	18.3546	9.95266	0.882921	0.00045	0.00749931	yes	TCONS_00012768	XLOC_006637	Dhrs7	chr12:73751339-73765815	1304
TCONS_00012782	gcKO	WT	12.4394	20.0993	-0.692184	0.0023	0.0318702	yes	TCONS_00012782	XLOC_006646	Ppp2r5e	chr12:76551755-76697187	4262
TCONS_00012820	gcKO	WT	17.3941	28.6792	-0.721374	0.00215	0.0300538	yes	TCONS_00012820	XLOC_006664	Vti1b	chr12:80231774-80273445	1281
TCONS_00012849	gcKO	WT	35.4135	66.3654	-0.906113	0.00135	0.0203078	yes	TCONS_00012849	XLOC_006681	Gm4787	chr12:82460017-82586143	2496
TCONS_00012857	gcKO	WT	2.69532	1.14649	1.23251	5e-05	0.00104398	yes	TCONS_00012857	XLOC_006686	Map3k9	chr12:82815936-82882157	10619
TCONS_00012983	gcKO	WT	275.909	502.309	-0.86438	5e-05	0.00104398	yes	TCONS_00012983	XLOC_006740	1700019M22Rik	chr12:97284828-97285432	604
TCONS_00012984	gcKO	WT	4.05096	0.001	10.9844	5e-05	0.00104398	yes	TCONS_00012984	XLOC_006741	NA	chr12:98957258-98978452	468
TCONS_00013042	gcKO	WT	59.376	104.93	-0.821465	7e-04	0.0113235	yes	TCONS_00013042	XLOC_006762	Atxn3	chr12:103157110-103196453	1002
TCONS_00013045	gcKO	WT	36.2361	22.3768	0.695399	0.0015	0.0223107	yes	TCONS_00013045	XLOC_006764	Lgmn	chr12:103632307-103677907	1874
TCONS_00013083	gcKO	WT	5.31586	1.02286	2.37656	5e-05	0.00104398	yes	TCONS_00013083	XLOC_006785	Serpina12	chr12:105266978-105282653	3690
TCONS_00013236	gcKO	WT	988.815	0.001	18.9153	5e-05	0.00104398	yes	TCONS_00013236	XLOC_006852	NA	chr12:3804763-3804867	104
TCONS_00013237	gcKO	WT	1532.29	0.001	19.5473	5e-05	0.00104398	yes	TCONS_00013237	XLOC_006853	NA	chr12:4125568-4125627	59
TCONS_00013240	gcKO	WT	983.605	0.001	18.9077	5e-05	0.00104398	yes	TCONS_00013240	XLOC_006856	NA	chr12:5565437-5565510	73
TCONS_00013241	gcKO	WT	1157.57	0.001	19.1427	5e-05	0.00104398	yes	TCONS_00013241	XLOC_006857	NA	chr12:5861025-5861107	82
TCONS_00013242	gcKO	WT	556.166	0.001	18.0852	5e-05	0.00104398	yes	TCONS_00013242	XLOC_006858	NA	chr12:5934472-5934553	81
TCONS_00013247	gcKO	WT	1113.36	0.001	19.0865	5e-05	0.00104398	yes	TCONS_00013247	XLOC_006863	NA	chr12:6455583-6455667	84
TCONS_00013248	gcKO	WT	1114.9	0.001	19.0885	5e-05	0.00104398	yes	TCONS_00013248	XLOC_006864	NA	chr12:7517280-7517342	62
TCONS_00013249	gcKO	WT	0.001	28.8287	-13.8153	0.00135	0.0203078	yes	TCONS_00013249	XLOC_006865	NA	chr12:7576491-7576659	168
TCONS_00013251	gcKO	WT	1106.55	0.001	19.0776	5e-05	0.00104398	yes	TCONS_00013251	XLOC_006867	NA	chr12:7615998-7616071	73
TCONS_00013252	gcKO	WT	0.001	58.1505	-14.8275	0.0033	0.0430246	yes	TCONS_00013252	XLOC_006868	NA	chr12:7631124-7631255	131
TCONS_00013255	gcKO	WT	323.913	0.001	17.3053	0.002	0.0281652	yes	TCONS_00013255	XLOC_006871	NA	chr12:7933367-7933445	78
TCONS_00013257	gcKO	WT	601.924	0.001	18.1992	5e-05	0.00104398	yes	TCONS_00013257	XLOC_006873	NA	chr12:8068767-8068847	80
TCONS_00013258	gcKO	WT	629.675	0.001	18.2643	0.00025	0.00433359	yes	TCONS_00013258	XLOC_006874	NA	chr12:8296497-8296570	73
TCONS_00013259	gcKO	WT	447.889	0.001	17.7728	5e-05	0.00104398	yes	TCONS_00013259	XLOC_006875	NA	chr12:8435414-8435506	92
TCONS_00013260	gcKO	WT	693.452	0.001	18.4034	5e-05	0.00104398	yes	TCONS_00013260	XLOC_006876	NA	chr12:8511020-8511129	109
TCONS_00013261	gcKO	WT	437.392	0.001	17.7386	5e-05	0.00104398	yes	TCONS_00013261	XLOC_006877	NA	chr12:8766013-8766097	84
TCONS_00013264	gcKO	WT	443.4	0.001	17.7583	5e-05	0.00104398	yes	TCONS_00013264	XLOC_006880	NA	chr12:8926408-8926504	96
TCONS_00013266	gcKO	WT	2617.96	0.001	20.32	5e-05	0.00104398	yes	TCONS_00013266	XLOC_006882	NA	chr12:9593057-9593114	57
TCONS_00013268	gcKO	WT	0.001	139.328	-16.0881	0.00195	0.0275981	yes	TCONS_00013268	XLOC_006884	NA	chr12:11227360-11227463	103
TCONS_00013269	gcKO	WT	1381.33	0.001	19.3976	1e-04	0.00182757	yes	TCONS_00013269	XLOC_006885	NA	chr12:12772071-12772127	56
TCONS_00013272	gcKO	WT	1489.89	0.001	19.5068	5e-05	0.00104398	yes	TCONS_00013272	XLOC_006888	NA	chr12:12850832-12850890	58
TCONS_00013275	gcKO	WT	778.118	0.001	18.5696	5e-05	0.00104398	yes	TCONS_00013275	XLOC_006891	NA	chr12:13143365-13143450	85
TCONS_00013278	gcKO	WT	1026.28	0.001	18.969	5e-05	0.00104398	yes	TCONS_00013278	XLOC_006894	NA	chr12:14996055-14996127	72
TCONS_00013279	gcKO	WT	266.733	0.001	17.025	5e-05	0.00104398	yes	TCONS_00013279	XLOC_006895	NA	chr12:15595301-15595401	100
TCONS_00013280	gcKO	WT	764.439	0.001	18.544	1e-04	0.00182757	yes	TCONS_00013280	XLOC_006896	NA	chr12:15837734-15837802	68
TCONS_00013281	gcKO	WT	169.861	0.001	16.374	5e-05	0.00104398	yes	TCONS_00013281	XLOC_006897	NA	chr12:15842998-15843123	125
TCONS_00013285	gcKO	WT	837.542	0.001	18.6758	1e-04	0.00182757	yes	TCONS_00013285	XLOC_006901	NA	chr12:17561355-17561421	66
TCONS_00013287	gcKO	WT	410.896	0.001	17.6484	5e-05	0.00104398	yes	TCONS_00013287	XLOC_006903	NA	chr12:18232830-18232935	105
TCONS_00013288	gcKO	WT	1197.13	0.001	19.1912	5e-05	0.00104398	yes	TCONS_00013288	XLOC_006904	NA	chr12:18234511-18234594	83
TCONS_00013297	gcKO	WT	16.6503	0.001	13.0233	0.00355	0.0456397	yes	TCONS_00013297	XLOC_006913	NA	chr12:18256982-18257156	174
TCONS_00013298	gcKO	WT	10.1287	0.001	12.3063	0.00025	0.00433359	yes	TCONS_00013298	XLOC_006914	NA	chr12:18257420-18257650	230
TCONS_00013302	gcKO	WT	1049.14	0.001	19.0008	5e-05	0.00104398	yes	TCONS_00013302	XLOC_006918	NA	chr12:21456845-21456915	70
TCONS_00013305	gcKO	WT	1.82628	0.001	9.83548	5e-05	0.00104398	yes	TCONS_00013305	XLOC_006921	NA	chr12:25138847-25139459	612
TCONS_00013310	gcKO	WT	273.931	0.001	17.0635	5e-05	0.00104398	yes	TCONS_00013310	XLOC_006926	NA	chr12:25902637-25902742	105
TCONS_00013314	gcKO	WT	1829.25	0.001	19.8028	5e-05	0.00104398	yes	TCONS_00013314	XLOC_006930	NA	chr12:27543273-27543329	56
TCONS_00013320	gcKO	WT	20.2677	0.001	13.307	3e-04	0.00513973	yes	TCONS_00013320	XLOC_006936	NA	chr12:28739902-28740089	187
TCONS_00013324	gcKO	WT	699.431	0.001	18.4158	1e-04	0.00182757	yes	TCONS_00013324	XLOC_006940	NA	chr12:30610708-30610778	70
TCONS_00013327	gcKO	WT	547.622	0.001	18.0628	5e-05	0.00104398	yes	TCONS_00013327	XLOC_006943	NA	chr12:31943815-31943935	120
TCONS_00013336	gcKO	WT	542.881	0.001	18.0503	1e-04	0.00182757	yes	TCONS_00013336	XLOC_006952	NA	chr12:33555941-33556017	76
TCONS_00013337	gcKO	WT	1796.3	0.001	19.7766	5e-05	0.00104398	yes	TCONS_00013337	XLOC_006953	NA	chr12:33563139-33563192	53
TCONS_00013341	gcKO	WT	1916.99	0.001	19.8704	5e-05	0.00104398	yes	TCONS_00013341	XLOC_006957	NA	chr12:33948599-33948660	61
TCONS_00013342	gcKO	WT	369.357	0.001	17.4947	1e-04	0.00182757	yes	TCONS_00013342	XLOC_006958	NA	chr12:33963542-33963628	86
TCONS_00013343	gcKO	WT	0.001	235.067	-16.8427	0.0033	0.0430246	yes	TCONS_00013343	XLOC_006959	NA	chr12:33974151-33974236	85
TCONS_00013348	gcKO	WT	1146.66	0.001	19.129	5e-05	0.00104398	yes	TCONS_00013348	XLOC_006964	NA	chr12:34062308-34062376	68
TCONS_00013351	gcKO	WT	1542.78	0.001	19.5571	1e-04	0.00182757	yes	TCONS_00013351	XLOC_006967	NA	chr12:36404046-36404100	54
TCONS_00013353	gcKO	WT	1489.89	0.001	19.5068	5e-05	0.00104398	yes	TCONS_00013353	XLOC_006969	NA	chr12:37740901-37740959	58
TCONS_00013361	gcKO	WT	366.267	0.001	17.4825	5e-05	0.00104398	yes	TCONS_00013361	XLOC_006977	NA	chr12:43260156-43260256	100
TCONS_00013364	gcKO	WT	1175.14	0.001	19.1644	5e-05	0.00104398	yes	TCONS_00013364	XLOC_006980	NA	chr12:44983800-44983901	101
TCONS_00013365	gcKO	WT	1241.57	0.001	19.2437	1e-04	0.00182757	yes	TCONS_00013365	XLOC_006981	NA	chr12:45366238-45366296	58
TCONS_00013366	gcKO	WT	464.646	0.001	17.8258	5e-05	0.00104398	yes	TCONS_00013366	XLOC_006982	NA	chr12:45367580-45367686	106
TCONS_00013368	gcKO	WT	1740.99	0.001	19.7315	5e-05	0.00104398	yes	TCONS_00013368	XLOC_006984	NA	chr12:45418330-45418401	71
TCONS_00013369	gcKO	WT	814.588	0.001	18.6357	5e-05	0.00104398	yes	TCONS_00013369	XLOC_006985	NA	chr12:45427549-45427631	82
TCONS_00013370	gcKO	WT	1520.32	0.001	19.5359	5e-05	0.00104398	yes	TCONS_00013370	XLOC_006986	NA	chr12:46816080-46816142	62
TCONS_00013373	gcKO	WT	1090.42	0.001	19.0565	5e-05	0.00104398	yes	TCONS_00013373	XLOC_006989	NA	chr12:52583889-52583961	72
TCONS_00013378	gcKO	WT	1181.81	0.001	19.1726	5e-05	0.00104398	yes	TCONS_00013378	XLOC_006994	NA	chr12:53605059-53605122	63
TCONS_00013379	gcKO	WT	401.836	0.001	17.6163	5e-05	0.00104398	yes	TCONS_00013379	XLOC_006995	NA	chr12:53671402-53671493	91
TCONS_00013380	gcKO	WT	1119.86	0.001	19.0949	5e-05	0.00104398	yes	TCONS_00013380	XLOC_006996	NA	chr12:53688175-53688242	67
TCONS_00013384	gcKO	WT	701.271	0.001	18.4196	5e-05	0.00104398	yes	TCONS_00013384	XLOC_007000	NA	chr12:55177488-55177566	78
TCONS_00013385	gcKO	WT	0.001	47.7404	-14.543	0.0033	0.0430246	yes	TCONS_00013385	XLOC_007001	NA	chr12:55179338-55179477	139
TCONS_00013386	gcKO	WT	80.5118	0.001	15.2969	0.00355	0.0456397	yes	TCONS_00013386	XLOC_007002	NA	chr12:55313466-55313583	117
TCONS_00013390	gcKO	WT	1650.16	0.001	19.6542	5e-05	0.00104398	yes	TCONS_00013390	XLOC_007006	NA	chr12:57055844-57055903	59
TCONS_00013394	gcKO	WT	756.634	0.001	18.5292	5e-05	0.00104398	yes	TCONS_00013394	XLOC_007010	NA	chr12:57715027-57715100	73
TCONS_00013395	gcKO	WT	14.4834	25.1177	-0.794262	0.0011	0.016978	yes	TCONS_00013395	XLOC_007011	NA	chr12:59914875-59916392	1517
TCONS_00013396	gcKO	WT	1237.95	0.001	19.2395	5e-05	0.00104398	yes	TCONS_00013396	XLOC_007012	NA	chr12:59943567-59943641	74
TCONS_00013399	gcKO	WT	179.547	276.803	-0.624495	0.00395	0.0499734	yes	TCONS_00013399	XLOC_007015	NA	chr12:63788777-63789366	589
TCONS_00013402	gcKO	WT	6.19391	0.001	11.5969	5e-05	0.00104398	yes	TCONS_00013402	XLOC_007018	NA	chr12:68397791-68398142	351
TCONS_00013406	gcKO	WT	1614.04	0.001	19.6222	5e-05	0.00104398	yes	TCONS_00013406	XLOC_007022	NA	chr12:70468858-70468916	58
TCONS_00013412	gcKO	WT	115.418	0.001	15.8165	0.00025	0.00433359	yes	TCONS_00013412	XLOC_007028	NA	chr12:72075415-72075532	117
TCONS_00013414	gcKO	WT	0.001	91.1629	-15.4762	0.0012	0.0183009	yes	TCONS_00013414	XLOC_007030	NA	chr12:72561788-72561911	123
TCONS_00013415	gcKO	WT	803.671	0.001	18.6162	5e-05	0.00104398	yes	TCONS_00013415	XLOC_007031	NA	chr12:72895112-72895203	91
TCONS_00013419	gcKO	WT	884.249	0.001	18.7541	5e-05	0.00104398	yes	TCONS_00013419	XLOC_007035	NA	chr12:73850212-73850286	74
TCONS_00013427	gcKO	WT	0.001	35.6865	-14.1231	0.00155	0.022832	yes	TCONS_00013427	XLOC_007043	NA	chr12:75383998-75384151	153
TCONS_00013431	gcKO	WT	228.206	0.001	16.8	5e-05	0.00104398	yes	TCONS_00013431	XLOC_007047	NA	chr12:75994370-75994514	144
TCONS_00013434	gcKO	WT	937.458	0.001	18.8384	5e-05	0.00104398	yes	TCONS_00013434	XLOC_007050	NA	chr12:76771933-76772004	71
TCONS_00013437	gcKO	WT	764.439	0.001	18.544	1e-04	0.00182757	yes	TCONS_00013437	XLOC_007053	NA	chr12:76919098-76919166	68
TCONS_00013438	gcKO	WT	1539.42	0.001	19.554	5e-05	0.00104398	yes	TCONS_00013438	XLOC_007054	NA	chr12:77355588-77355660	72
TCONS_00013441	gcKO	WT	735.242	0.001	18.4879	5e-05	0.00104398	yes	TCONS_00013441	XLOC_007057	NA	chr12:78760094-78760169	75
TCONS_00013447	gcKO	WT	0.001	13.0671	-12.6738	0.00105	0.016314	yes	TCONS_00013447	XLOC_007063	NA	chr12:80975825-80976048	223
TCONS_00013449	gcKO	WT	1231.93	0.001	19.2325	5e-05	0.00104398	yes	TCONS_00013449	XLOC_007065	NA	chr12:81035681-81035741	60
TCONS_00013455	gcKO	WT	425.926	0.001	17.7002	5e-05	0.00104398	yes	TCONS_00013455	XLOC_007071	NA	chr12:81845346-81845456	110
TCONS_00013460	gcKO	WT	0.001	199.839	-16.6085	0.00195	0.0275981	yes	TCONS_00013460	XLOC_007076	NA	chr12:82779879-82779971	92
TCONS_00013464	gcKO	WT	877.53	0.001	18.7431	1e-04	0.00182757	yes	TCONS_00013464	XLOC_007080	NA	chr12:85028704-85028769	65
TCONS_00013467	gcKO	WT	0.001	20.6795	-13.336	0.00035	0.00592226	yes	TCONS_00013467	XLOC_007083	NA	chr12:85624451-85624651	200
TCONS_00013470	gcKO	WT	602.64	0.001	18.2009	5e-05	0.00104398	yes	TCONS_00013470	XLOC_007086	NA	chr12:86796599-86796684	85
TCONS_00013471	gcKO	WT	386.671	0.001	17.5608	5e-05	0.00104398	yes	TCONS_00013471	XLOC_007087	NA	chr12:86828330-86828432	102
TCONS_00013482	gcKO	WT	534.272	0.001	18.0272	5e-05	0.00104398	yes	TCONS_00013482	XLOC_007098	NA	chr12:89860067-89860154	87
TCONS_00013483	gcKO	WT	925.637	0.001	18.8201	5e-05	0.00104398	yes	TCONS_00013483	XLOC_007099	NA	chr12:89861065-89861157	92
TCONS_00013485	gcKO	WT	1701.67	0.001	19.6985	5e-05	0.00104398	yes	TCONS_00013485	XLOC_007101	NA	chr12:92789957-92790014	57
TCONS_00013488	gcKO	WT	3018.94	0.001	20.5256	5e-05	0.00104398	yes	TCONS_00013488	XLOC_007104	NA	chr12:94989811-94989857	46
TCONS_00013489	gcKO	WT	512.146	0.001	17.9662	5e-05	0.00104398	yes	TCONS_00013489	XLOC_007105	NA	chr12:95117672-95117762	90
TCONS_00013490	gcKO	WT	1475.27	0.001	19.4925	5e-05	0.00104398	yes	TCONS_00013490	XLOC_007106	NA	chr12:95198463-95198535	72
TCONS_00013491	gcKO	WT	459.792	0.001	17.8106	5e-05	0.00104398	yes	TCONS_00013491	XLOC_007107	NA	chr12:95297298-95297383	85
TCONS_00013492	gcKO	WT	0.001	56.7006	-14.7911	0.0033	0.0430246	yes	TCONS_00013492	XLOC_007108	NA	chr12:96149938-96150070	132
TCONS_00013495	gcKO	WT	1519.46	0.001	19.5351	5e-05	0.00104398	yes	TCONS_00013495	XLOC_007111	NA	chr12:96703781-96703837	56
TCONS_00013496	gcKO	WT	1472.08	0.001	19.4894	5e-05	0.00104398	yes	TCONS_00013496	XLOC_007112	NA	chr12:97911254-97911318	64
TCONS_00013507	gcKO	WT	641.424	0.001	18.2909	1e-04	0.00182757	yes	TCONS_00013507	XLOC_007123	NA	chr12:100934015-100934087	72
TCONS_00013512	gcKO	WT	1158.38	0.001	19.1437	5e-05	0.00104398	yes	TCONS_00013512	XLOC_007128	NA	chr12:103507307-103507370	63
TCONS_00013520	gcKO	WT	1231.93	0.001	19.2325	5e-05	0.00104398	yes	TCONS_00013520	XLOC_007136	NA	chr12:104977469-104977529	60
TCONS_00013522	gcKO	WT	2.65039	0.001	10.3725	5e-05	0.00104398	yes	TCONS_00013522	XLOC_007138	NA	chr12:105302175-105302696	521
TCONS_00013535	gcKO	WT	1356.1	0.001	19.371	5e-05	0.00104398	yes	TCONS_00013535	XLOC_007151	NA	chr12:107113299-107113392	93
TCONS_00013536	gcKO	WT	1459.08	0.001	19.4766	1e-04	0.00182757	yes	TCONS_00013536	XLOC_007152	NA	chr12:107210848-107210903	55
TCONS_00013537	gcKO	WT	233.34	0.001	16.8321	5e-05	0.00104398	yes	TCONS_00013537	XLOC_007153	NA	chr12:107225858-107225988	130
TCONS_00013538	gcKO	WT	555.622	0.001	18.0837	5e-05	0.00104398	yes	TCONS_00013538	XLOC_007154	NA	chr12:107375716-107375796	80
TCONS_00013545	gcKO	WT	130465	18555.8	2.81372	0.00085	0.0135078	yes	TCONS_00013545	XLOC_007161	NA	chr12:108553610-108553638	28
TCONS_00013555	gcKO	WT	471.604	0.001	17.8472	5e-05	0.00104398	yes	TCONS_00013555	XLOC_007171	NA	chr12:110028023-110028105	82
TCONS_00013558	gcKO	WT	1564.09	0.001	19.5769	5e-05	0.00104398	yes	TCONS_00013558	XLOC_007174	NA	chr12:110664302-110664366	64
TCONS_00013566	gcKO	WT	1381.33	0.001	19.3976	1e-04	0.00182757	yes	TCONS_00013566	XLOC_007182	NA	chr12:111357013-111357069	56
TCONS_00013567	gcKO	WT	665.296	0.001	18.3436	5e-05	0.00104398	yes	TCONS_00013567	XLOC_007183	NA	chr12:111468784-111468882	98
TCONS_00013569	gcKO	WT	1114.57	0.001	19.0881	5e-05	0.00104398	yes	TCONS_00013569	XLOC_007185	NA	chr12:111684264-111684347	83
TCONS_00013574	gcKO	WT	625.93	0.001	18.2556	5e-05	0.00104398	yes	TCONS_00013574	XLOC_007190	NA	chr12:112218106-112218185	79
TCONS_00013575	gcKO	WT	1199.85	0.001	19.1944	5e-05	0.00104398	yes	TCONS_00013575	XLOC_007191	NA	chr12:112224348-112224415	67
TCONS_00013578	gcKO	WT	516.918	0.001	17.9796	5e-05	0.00104398	yes	TCONS_00013578	XLOC_007194	NA	chr12:112355218-112355302	84
TCONS_00013590	gcKO	WT	1381.17	0.001	19.3975	5e-05	0.00104398	yes	TCONS_00013590	XLOC_007206	NA	chr12:114251570-114251633	63
TCONS_00013594	gcKO	WT	199.37	0.001	16.6051	5e-05	0.00104398	yes	TCONS_00013594	XLOC_007210	NA	chr12:114652590-114652704	114
TCONS_00013595	gcKO	WT	1633	0.001	19.6391	1e-04	0.00182757	yes	TCONS_00013595	XLOC_007211	NA	chr12:115558396-115558449	53
TCONS_00013599	gcKO	WT	630.003	0.001	18.265	5e-05	0.00104398	yes	TCONS_00013599	XLOC_007215	NA	chr12:120397692-120397781	89
TCONS_00013647	gcKO	WT	4.11687	0.001	11.0077	0.00025	0.00433359	yes	TCONS_00013647	XLOC_007246	NA	chr13:13442629-13445334	360
TCONS_00013661	gcKO	WT	6.61859	22.9379	-1.79298	0.002	0.0281652	yes	TCONS_00013661	XLOC_007253	Psma2	chr13:14705501-14717949	961
TCONS_00013691	gcKO	WT	22.0012	7.80813	1.49441	3e-04	0.00513973	yes	TCONS_00013691	XLOC_007268	Gpx6	chr13:21404071-21411496	911
TCONS_00013693	gcKO	WT	5.64714	11.5272	-1.02932	0.00255	0.0347881	yes	TCONS_00013693	XLOC_007270	Zscan12	chr13:21454683-21464171	4726
TCONS_00013694	gcKO	WT	1.74498	6.62626	-1.92438	0.00225	0.0312537	yes	TCONS_00013694	XLOC_007270	Zscan12	chr13:21454683-21464171	4418
TCONS_00013800	gcKO	WT	201.957	0.001	16.6237	5e-05	0.00104398	yes	TCONS_00013800	XLOC_007356	NA	chr13:28178558-28179249	110
TCONS_00013809	gcKO	WT	3.37077	1.36676	1.30169	0.0017	0.0247116	yes	TCONS_00013809	XLOC_007361	Mboat1	chr13:30228358-30338563	2881
TCONS_00013847	gcKO	WT	471.52	0.001	17.847	5e-05	0.00104398	yes	TCONS_00013847	XLOC_007386	NA	chr13:34803558-34804429	98
TCONS_00013944	gcKO	WT	2.76976	0.857154	1.69097	0.0011	0.016978	yes	TCONS_00013944	XLOC_007429	Rbm24	chr13:46513668-46526468	3224
TCONS_00013950	gcKO	WT	12.919	0.001	12.6573	3e-04	0.00513973	yes	TCONS_00013950	XLOC_007432	NA	chr13:47082006-47103642	214
TCONS_00014050	gcKO	WT	15.2416	104.863	-2.78234	0.0013	0.0196599	yes	TCONS_00014050	XLOC_007475	Gm2762	chr13:53488787-53551297	2339
TCONS_00014069	gcKO	WT	8.88434	4.47151	0.990342	0.00185	0.0265711	yes	TCONS_00014069	XLOC_007486	Tspan17	chr13:54890765-54898136	1556
TCONS_00014091	gcKO	WT	12.9158	7.05886	0.871537	7e-04	0.0113235	yes	TCONS_00014091	XLOC_007499	B4galt7	chr13:55701471-55711315	1596
TCONS_00014160	gcKO	WT	0.950703	6.80665	-2.83857	1e-04	0.00182757	yes	TCONS_00014160	XLOC_007535	Ercc6l2	chr13:63915683-64001609	6382
TCONS_00014192	gcKO	WT	30.0143	65.5653	-1.12726	5e-05	0.00104398	yes	TCONS_00014192	XLOC_007556	BC048507	chr13:67964262-67964860	598
TCONS_00014275	gcKO	WT	50.8648	94.7559	-0.897535	2e-04	0.00353476	yes	TCONS_00014275	XLOC_007599	Cetn3	chr13:81922290-81936156	1013
TCONS_00014323	gcKO	WT	5.00455	2.44101	1.03546	0.00015	0.00268331	yes	TCONS_00014323	XLOC_007623	Arsb	chr13:94541633-94712971	3989
TCONS_00014339	gcKO	WT	24752.7	10393.4	1.25192	5e-05	0.00104398	yes	TCONS_00014339	XLOC_007633	Snora47	chr13:96095191-96107796	126
TCONS_00014493	gcKO	WT	5.33925	2.19574	1.28154	1e-04	0.00182757	yes	TCONS_00014493	XLOC_007703	Emb	chr13:118009379-118063222	2622
TCONS_00014524	gcKO	WT	10.6644	19.1648	-0.845596	5e-04	0.00825634	yes	TCONS_00014524	XLOC_007719	Akr1e1	chr13:4591735-4608410	1713
TCONS_00014565	gcKO	WT	1.79721	0.210805	3.08575	0.00395	0.0499734	yes	TCONS_00014565	XLOC_007735	Gpr137b	chr13:13449887-13485891	2980
TCONS_00014591	gcKO	WT	4.42727	7.86023	-0.828012	0.0012	0.0183009	yes	TCONS_00014591	XLOC_007748	Yae1d1	chr13:18078473-18085185	3436
TCONS_00014601	gcKO	WT	52.2413	84.1676	-0.688064	0.0024	0.0329911	yes	TCONS_00014601	XLOC_007753	Nme8	chr13:19736942-19789633	2087
TCONS_00014647	gcKO	WT	38.5765	16.7928	1.19983	5e-05	0.00104398	yes	TCONS_00014647	XLOC_007787	Hist1h4i	chr13:22132684-22133221	537
TCONS_00014750	gcKO	WT	2.85238	1.17081	1.28393	5e-05	0.00104398	yes	TCONS_00014750	XLOC_007849	E2f3	chr13:29998443-30077932	5097
TCONS_00014762	gcKO	WT	11.3929	2.25053	2.33928	0.00205	0.0288285	yes	TCONS_00014762	XLOC_007854	4930401O12Rik	chr13:31305278-31332955	841
TCONS_00014779	gcKO	WT	5.09636	1.75558	1.53698	0.00225	0.0312537	yes	TCONS_00014779	XLOC_007862	NA	chr13:33655817-33660730	1666
TCONS_00014831	gcKO	WT	62.189	133.05	-1.09722	6e-04	0.00979359	yes	TCONS_00014831	XLOC_007884	Cage1	chr13:38097918-38153302	2858
TCONS_00014874	gcKO	WT	11.2448	81.6543	-2.86016	0.0019	0.0272203	yes	TCONS_00014874	XLOC_007900	Ranbp9	chr13:43493744-43576493	3064
TCONS_00014875	gcKO	WT	80.0924	8.19914	3.28796	0.0025	0.0342118	yes	TCONS_00014875	XLOC_007900	Ranbp9	chr13:43493744-43576493	2214
TCONS_00014932	gcKO	WT	5.77854	11.2479	-0.960757	1e-04	0.00182757	yes	TCONS_00014932	XLOC_007924	NA	chr13:49879404-49885703	4331
TCONS_00015156	gcKO	WT	222.038	365.846	-0.720427	0.0015	0.0223107	yes	TCONS_00015156	XLOC_008034	Fbp1	chr13:62966112-62989663	1479
TCONS_00015164	gcKO	WT	1.60075	4.58687	-1.51818	5e-05	0.00104398	yes	TCONS_00015164	XLOC_008037	Fancc	chr13:63406016-63533053	3132
TCONS_00015170	gcKO	WT	37.1486	13.6055	1.44905	5e-05	0.00104398	yes	TCONS_00015170	XLOC_008041	Hsd17b3	chr13:64159581-64190509	1286
TCONS_00015236	gcKO	WT	2.48801	6.67904	-1.42428	0.00025	0.00433359	yes	TCONS_00015236	XLOC_008076	4930525G20Rik	chr13:67897530-67931922	2987
TCONS_00015251	gcKO	WT	4.41217	12.0733	-1.45205	0.00015	0.00268331	yes	TCONS_00015251	XLOC_008085	NA	chr13:69910196-69911671	1267
TCONS_00015376	gcKO	WT	117.527	73.8798	0.669733	0.0015	0.0223107	yes	TCONS_00015376	XLOC_008144	Bhmt	chr13:94386845-94407713	2071
TCONS_00015439	gcKO	WT	150.033	285.143	-0.926401	5e-05	0.00104398	yes	TCONS_00015439	XLOC_008176	1700024P04Rik	chr13:99754044-99754520	476
TCONS_00015592	gcKO	WT	334.677	0.001	17.3524	5e-05	0.00104398	yes	TCONS_00015592	XLOC_008247	NA	chr13:3003081-3003175	94
TCONS_00015600	gcKO	WT	1114.7	0.001	19.0882	5e-05	0.00104398	yes	TCONS_00015600	XLOC_008255	NA	chr13:3144046-3144128	82
TCONS_00015605	gcKO	WT	0.001	1215.1	-19.2126	0.001	0.0156412	yes	TCONS_00015605	XLOC_008260	NA	chr13:6006755-6006808	53
TCONS_00015607	gcKO	WT	412.321	0.001	17.6534	5e-05	0.00104398	yes	TCONS_00015607	XLOC_008262	NA	chr13:9180375-9180463	88
TCONS_00015609	gcKO	WT	1256.31	0.001	19.2608	5e-05	0.00104398	yes	TCONS_00015609	XLOC_008264	NA	chr13:12350934-12351000	66
TCONS_00015610	gcKO	WT	740.829	0.001	18.4988	5e-05	0.00104398	yes	TCONS_00015610	XLOC_008265	NA	chr13:12469181-12469261	80
TCONS_00015611	gcKO	WT	787.978	0.001	18.5878	0.00015	0.00268331	yes	TCONS_00015611	XLOC_008266	NA	chr13:13325167-13325235	68
TCONS_00015612	gcKO	WT	1140.05	0.001	19.1207	5e-05	0.00104398	yes	TCONS_00015612	XLOC_008267	NA	chr13:13425134-13425210	76
TCONS_00015613	gcKO	WT	32.2954	0.001	13.9791	5e-05	0.00104398	yes	TCONS_00015613	XLOC_008268	NA	chr13:13442629-13445334	213
TCONS_00015614	gcKO	WT	5.35528	0.001	11.387	5e-05	0.00104398	yes	TCONS_00015614	XLOC_008269	NA	chr13:13442629-13445334	487
TCONS_00015615	gcKO	WT	1119.94	0.001	19.095	1e-04	0.00182757	yes	TCONS_00015615	XLOC_008270	NA	chr13:14294515-14294575	60
TCONS_00015616	gcKO	WT	1461.99	0.001	19.4795	5e-05	0.00104398	yes	TCONS_00015616	XLOC_008271	NA	chr13:14296009-14296078	69
TCONS_00015617	gcKO	WT	564.773	0.001	18.1073	0.00355	0.0456397	yes	TCONS_00015617	XLOC_008272	NA	chr13:14811554-14811617	63
TCONS_00015621	gcKO	WT	352.101	0.001	17.4256	5e-05	0.00104398	yes	TCONS_00015621	XLOC_008276	NA	chr13:18492620-18492710	90
TCONS_00015622	gcKO	WT	1108.07	0.001	19.0796	5e-05	0.00104398	yes	TCONS_00015622	XLOC_008277	NA	chr13:18502532-18502618	86
TCONS_00015623	gcKO	WT	233.938	0.001	16.8358	5e-05	0.00104398	yes	TCONS_00015623	XLOC_008278	NA	chr13:19487772-19487889	117
TCONS_00015624	gcKO	WT	1064.94	0.001	19.0223	5e-05	0.00104398	yes	TCONS_00015624	XLOC_008279	NA	chr13:19491022-19491102	80
TCONS_00015625	gcKO	WT	105385	239069	-1.18176	0.00275	0.037096	yes	TCONS_00015625	XLOC_008280	NA	chr13:19621324-19621349	25
TCONS_00015626	gcKO	WT	1539.42	0.001	19.554	5e-05	0.00104398	yes	TCONS_00015626	XLOC_008281	NA	chr13:19987894-19987966	72
TCONS_00015627	gcKO	WT	167.911	0.001	16.3573	5e-05	0.00104398	yes	TCONS_00015627	XLOC_008282	NA	chr13:20011357-20011479	122
TCONS_00015629	gcKO	WT	967.199	0.001	18.8835	5e-05	0.00104398	yes	TCONS_00015629	XLOC_008284	NA	chr13:21270853-21270938	85
TCONS_00015637	gcKO	WT	904.913	0.001	18.7874	5e-05	0.00104398	yes	TCONS_00015637	XLOC_008292	NA	chr13:22066507-22066582	75
TCONS_00015648	gcKO	WT	0.001	50.3222	-14.6189	0.0015	0.0223107	yes	TCONS_00015648	XLOC_008303	NA	chr13:24090430-24090574	144
TCONS_00015650	gcKO	WT	0.001	6.8178	-11.7353	0.00155	0.022832	yes	TCONS_00015650	XLOC_008305	NA	chr13:25138660-25138928	268
TCONS_00015653	gcKO	WT	1317.61	0.001	19.3295	5e-05	0.00104398	yes	TCONS_00015653	XLOC_008308	NA	chr13:27103443-27103505	62
TCONS_00015654	gcKO	WT	589.04	0.001	18.168	5e-05	0.00104398	yes	TCONS_00015654	XLOC_008309	NA	chr13:27135476-27135586	110
TCONS_00015658	gcKO	WT	1012.06	0.001	18.9489	5e-05	0.00104398	yes	TCONS_00015658	XLOC_008313	NA	chr13:30881909-30881973	64
TCONS_00015659	gcKO	WT	1072.85	0.001	19.033	5e-05	0.00104398	yes	TCONS_00015659	XLOC_008314	NA	chr13:33089192-33089277	85
TCONS_00015660	gcKO	WT	561.754	0.001	18.0996	5e-05	0.00104398	yes	TCONS_00015660	XLOC_008315	NA	chr13:33090812-33090912	100
TCONS_00015666	gcKO	WT	95.6106	0.001	15.5449	0.00355	0.0456397	yes	TCONS_00015666	XLOC_008321	NA	chr13:34826380-34826491	111
TCONS_00015677	gcKO	WT	1681.76	0.001	19.6815	5e-05	0.00104398	yes	TCONS_00015677	XLOC_008332	NA	chr13:36811356-36811424	68
TCONS_00015678	gcKO	WT	433.274	0.001	17.7249	5e-05	0.00104398	yes	TCONS_00015678	XLOC_008333	NA	chr13:37203107-37203192	85
TCONS_00015684	gcKO	WT	268.632	0.001	17.0353	5e-05	0.00104398	yes	TCONS_00015684	XLOC_008339	NA	chr13:37639367-37639465	98
TCONS_00015686	gcKO	WT	0.001	97.3718	-15.5712	0.0033	0.0430246	yes	TCONS_00015686	XLOC_008341	NA	chr13:37743412-37743524	112
TCONS_00015688	gcKO	WT	1119.94	0.001	19.095	1e-04	0.00182757	yes	TCONS_00015688	XLOC_008343	NA	chr13:37783727-37783787	60
TCONS_00015690	gcKO	WT	1203.71	0.001	19.1991	5e-05	0.00104398	yes	TCONS_00015690	XLOC_008345	NA	chr13:37807380-37807459	79
TCONS_00015694	gcKO	WT	17.937	0.001	13.1307	2e-04	0.00353476	yes	TCONS_00015694	XLOC_008349	NA	chr13:38916107-38916303	196
TCONS_00015698	gcKO	WT	603.117	0.001	18.2021	5e-05	0.00104398	yes	TCONS_00015698	XLOC_008353	NA	chr13:39891574-39891686	112
TCONS_00015700	gcKO	WT	1032.01	0.001	18.977	5e-05	0.00104398	yes	TCONS_00015700	XLOC_008355	NA	chr13:39917873-39917956	83
TCONS_00015702	gcKO	WT	799.179	0.001	18.6082	5e-05	0.00104398	yes	TCONS_00015702	XLOC_008357	NA	chr13:41700962-41701035	73
TCONS_00015704	gcKO	WT	1119.86	0.001	19.0949	5e-05	0.00104398	yes	TCONS_00015704	XLOC_008359	NA	chr13:42133149-42133216	67
TCONS_00015706	gcKO	WT	1679.91	0.001	19.68	5e-05	0.00104398	yes	TCONS_00015706	XLOC_008361	NA	chr13:42321039-42321099	60
TCONS_00015710	gcKO	WT	186.805	0.001	16.5112	5e-05	0.00104398	yes	TCONS_00015710	XLOC_008365	NA	chr13:44196677-44196800	123
TCONS_00015712	gcKO	WT	579.087	0.001	18.1434	5e-05	0.00104398	yes	TCONS_00015712	XLOC_008367	NA	chr13:44818047-44818128	81
TCONS_00015713	gcKO	WT	0.001	554.249	-18.0802	0.00155	0.022832	yes	TCONS_00015713	XLOC_008368	NA	chr13:45484222-45484290	68
TCONS_00015718	gcKO	WT	0.001	66.6867	-15.0251	5e-04	0.00825634	yes	TCONS_00015718	XLOC_008373	NA	chr13:47070001-47070139	138
TCONS_00015719	gcKO	WT	860.654	0.001	18.7151	5e-05	0.00104398	yes	TCONS_00015719	XLOC_008374	NA	chr13:47375344-47375417	73
TCONS_00015721	gcKO	WT	395.027	0.001	17.5916	0.00235	0.032416	yes	TCONS_00015721	XLOC_008376	NA	chr13:47490586-47490658	72
TCONS_00015724	gcKO	WT	728.842	0.001	18.4752	5e-05	0.00104398	yes	TCONS_00015724	XLOC_008379	NA	chr13:48382679-48382761	82
TCONS_00015739	gcKO	WT	286.106	0.001	17.1262	5e-05	0.00104398	yes	TCONS_00015739	XLOC_008394	NA	chr13:49869126-49869236	110
TCONS_00015747	gcKO	WT	234.798	0.001	16.8411	5e-05	0.00104398	yes	TCONS_00015747	XLOC_008402	NA	chr13:50093862-50093967	105
TCONS_00015754	gcKO	WT	1248.43	0.001	19.2517	5e-05	0.00104398	yes	TCONS_00015754	XLOC_008409	NA	chr13:50314052-50314125	73
TCONS_00015758	gcKO	WT	0.001	749.541	-18.5156	0.00195	0.0275981	yes	TCONS_00015758	XLOC_008413	NA	chr13:50383702-50383762	60
TCONS_00015768	gcKO	WT	282.519	0.001	17.108	5e-05	0.00104398	yes	TCONS_00015768	XLOC_008423	NA	chr13:50450910-50451014	104
TCONS_00015769	gcKO	WT	2903.34	0.001	20.4693	5e-05	0.00104398	yes	TCONS_00015769	XLOC_008424	NA	chr13:50487638-50487687	49
TCONS_00015800	gcKO	WT	63.1743	0.001	14.9471	5e-05	0.00104398	yes	TCONS_00015800	XLOC_008455	NA	chr13:52059816-52059976	160
TCONS_00015803	gcKO	WT	2027.16	0.001	19.951	5e-05	0.00104398	yes	TCONS_00015803	XLOC_008458	NA	chr13:53100410-53100473	63
TCONS_00015805	gcKO	WT	1146.66	0.001	19.129	5e-05	0.00104398	yes	TCONS_00015805	XLOC_008460	NA	chr13:53602733-53602801	68
TCONS_00015808	gcKO	WT	1039.87	0.001	18.988	5e-05	0.00104398	yes	TCONS_00015808	XLOC_008463	NA	chr13:54355636-54355703	67
TCONS_00015810	gcKO	WT	938.431	0.001	18.8399	5e-05	0.00104398	yes	TCONS_00015810	XLOC_008465	NA	chr13:55036205-55036282	77
TCONS_00015811	gcKO	WT	0.001	15.6896	-12.9376	0.0012	0.0183009	yes	TCONS_00015811	XLOC_008466	NA	chr13:55036504-55036713	209
TCONS_00015812	gcKO	WT	1796.3	0.001	19.7766	5e-05	0.00104398	yes	TCONS_00015812	XLOC_008467	NA	chr13:55439721-55439774	53
TCONS_00015815	gcKO	WT	870.497	0.001	18.7315	5e-05	0.00104398	yes	TCONS_00015815	XLOC_008470	NA	chr13:55938629-55938700	71
TCONS_00015816	gcKO	WT	529.922	0.001	18.0154	5e-05	0.00104398	yes	TCONS_00015816	XLOC_008471	NA	chr13:56335832-56335929	97
TCONS_00015822	gcKO	WT	104.165	0.001	15.6685	5e-05	0.00104398	yes	TCONS_00015822	XLOC_008477	NA	chr13:56766160-56766318	158
TCONS_00015823	gcKO	WT	536.424	0.001	18.033	5e-05	0.00104398	yes	TCONS_00015823	XLOC_008478	NA	chr13:56766742-56766827	85
TCONS_00015829	gcKO	WT	426.592	0.001	17.7025	5e-05	0.00104398	yes	TCONS_00015829	XLOC_008484	NA	chr13:57117547-57117664	117
TCONS_00015839	gcKO	WT	965.283	0.001	18.8806	5e-05	0.00104398	yes	TCONS_00015839	XLOC_008494	NA	chr13:58382787-58382852	65
TCONS_00015841	gcKO	WT	1539.42	0.001	19.554	5e-05	0.00104398	yes	TCONS_00015841	XLOC_008496	NA	chr13:58490567-58490639	72
TCONS_00015843	gcKO	WT	495.366	0.001	17.9181	5e-05	0.00104398	yes	TCONS_00015843	XLOC_008498	NA	chr13:58835613-58835696	83
TCONS_00015858	gcKO	WT	341.895	0.001	17.3832	5e-05	0.00104398	yes	TCONS_00015858	XLOC_008513	NA	chr13:60057133-60057231	98
TCONS_00015860	gcKO	WT	569.89	0.001	18.1203	5e-05	0.00104398	yes	TCONS_00015860	XLOC_008515	NA	chr13:60452847-60452934	87
TCONS_00015862	gcKO	WT	2204.62	0.001	20.0721	5e-05	0.00104398	yes	TCONS_00015862	XLOC_008517	NA	chr13:62815080-62815131	51
TCONS_00015869	gcKO	WT	1375.99	0.001	19.392	5e-05	0.00104398	yes	TCONS_00015869	XLOC_008524	NA	chr13:65329363-65329431	68
TCONS_00015874	gcKO	WT	434.664	0.001	17.7295	5e-05	0.00104398	yes	TCONS_00015874	XLOC_008529	NA	chr13:65516230-65516343	113
TCONS_00015876	gcKO	WT	21.7217	0.001	13.4069	1e-04	0.00182757	yes	TCONS_00015876	XLOC_008531	NA	chr13:65597555-65597764	209
TCONS_00015882	gcKO	WT	219.19	0.001	16.7418	5e-05	0.00104398	yes	TCONS_00015882	XLOC_008537	NA	chr13:67588738-67588844	106
TCONS_00015885	gcKO	WT	1140.79	0.001	19.1216	5e-05	0.00104398	yes	TCONS_00015885	XLOC_008540	NA	chr13:69535029-69535094	65
TCONS_00015887	gcKO	WT	1023.39	0.001	18.9649	5e-05	0.00104398	yes	TCONS_00015887	XLOC_008542	NA	chr13:69832639-69832708	69
TCONS_00015891	gcKO	WT	0.001	245.164	-16.9034	1e-04	0.00182757	yes	TCONS_00015891	XLOC_008546	NA	chr13:71175374-71175472	98
TCONS_00015892	gcKO	WT	668.177	0.001	18.3499	5e-05	0.00104398	yes	TCONS_00015892	XLOC_008547	NA	chr13:71178687-71178768	81
TCONS_00015896	gcKO	WT	959.293	0.001	18.8716	5e-05	0.00104398	yes	TCONS_00015896	XLOC_008551	NA	chr13:72227865-72227975	110
TCONS_00015897	gcKO	WT	746.481	0.001	18.5097	5e-05	0.00104398	yes	TCONS_00015897	XLOC_008552	NA	chr13:72798940-72799032	92
TCONS_00015898	gcKO	WT	656.904	0.001	18.3253	5e-05	0.00104398	yes	TCONS_00015898	XLOC_008553	NA	chr13:72826504-72826596	92
TCONS_00015902	gcKO	WT	922.129	0.001	18.8146	5e-05	0.00104398	yes	TCONS_00015902	XLOC_008557	NA	chr13:73885578-73885651	73
TCONS_00015910	gcKO	WT	309.105	0.001	17.2377	1e-04	0.00182757	yes	TCONS_00015910	XLOC_008565	NA	chr13:86715222-86715313	91
TCONS_00015912	gcKO	WT	651.18	0.001	18.3127	5e-05	0.00104398	yes	TCONS_00015912	XLOC_008567	NA	chr13:91002404-91002482	78
TCONS_00015918	gcKO	WT	884.249	0.001	18.7541	5e-05	0.00104398	yes	TCONS_00015918	XLOC_008573	NA	chr13:96040677-96040751	74
TCONS_00015930	gcKO	WT	1851.33	0.001	19.8201	5e-05	0.00104398	yes	TCONS_00015930	XLOC_008585	NA	chr13:99887909-99887963	54
TCONS_00015933	gcKO	WT	0.001	45.2315	-14.4651	0.00035	0.00592226	yes	TCONS_00015933	XLOC_008588	NA	chr13:100607724-100607882	158
TCONS_00015936	gcKO	WT	548.602	0.001	18.0654	5e-05	0.00104398	yes	TCONS_00015936	XLOC_008591	NA	chr13:103023410-103023539	129
TCONS_00015952	gcKO	WT	678.141	0.001	18.3712	5e-05	0.00104398	yes	TCONS_00015952	XLOC_008607	NA	chr13:105417236-105417332	96
TCONS_00015955	gcKO	WT	1104.06	0.001	19.0744	5e-05	0.00104398	yes	TCONS_00015955	XLOC_008610	NA	chr13:107439572-107439636	64
TCONS_00015957	gcKO	WT	993.77	0.001	18.9226	5e-05	0.00104398	yes	TCONS_00015957	XLOC_008612	NA	chr13:107879633-107879701	68
TCONS_00015958	gcKO	WT	728.842	0.001	18.4752	5e-05	0.00104398	yes	TCONS_00015958	XLOC_008613	NA	chr13:109081816-109081898	82
TCONS_00015960	gcKO	WT	836.741	0.001	18.6744	5e-05	0.00104398	yes	TCONS_00015960	XLOC_008615	NA	chr13:109267810-109267903	93
TCONS_00015966	gcKO	WT	477.155	0.001	17.8641	5e-05	0.00104398	yes	TCONS_00015966	XLOC_008621	NA	chr13:112474875-112474959	84
TCONS_00015968	gcKO	WT	1228.54	0.001	19.2285	5e-05	0.00104398	yes	TCONS_00015968	XLOC_008623	NA	chr13:113299399-113299464	65
TCONS_00015974	gcKO	WT	671.284	0.001	18.3566	5e-05	0.00104398	yes	TCONS_00015974	XLOC_008629	NA	chr13:114040845-114040950	105
TCONS_00015976	gcKO	WT	0.001	70.4927	-15.1052	0.00155	0.022832	yes	TCONS_00015976	XLOC_008631	NA	chr13:115551672-115551802	130
TCONS_00015981	gcKO	WT	879.892	0.001	18.747	5e-05	0.00104398	yes	TCONS_00015981	XLOC_008636	NA	chr13:119344355-119344422	67
TCONS_00016013	gcKO	WT	3.2122	6.13815	-0.934028	0.00295	0.039419	yes	TCONS_00016013	XLOC_008663	4930555G01Rik	chr14:5153653-5162268	2065
TCONS_00016088	gcKO	WT	73.9293	123.851	-0.744379	0.001	0.0156412	yes	TCONS_00016088	XLOC_008692	Ngly1	chr14:17071172-17144440	2901
TCONS_00016244	gcKO	WT	16.0415	9.65595	0.732259	0.0011	0.016978	yes	TCONS_00016244	XLOC_008751	Tkt	chr14:31362334-31387908	3207
TCONS_00016279	gcKO	WT	25.688	41.7328	-0.700066	0.00085	0.0135078	yes	TCONS_00016279	XLOC_008764	Bap1	chr14:32064659-32073160	3406
TCONS_00016286	gcKO	WT	11.1424	24.8918	-1.15954	5e-05	0.00104398	yes	TCONS_00016286	XLOC_008768	Galnt15	chr14:32842288-32871512	2341
TCONS_00016307	gcKO	WT	67.4262	106.856	-0.664279	0.0016	0.0234468	yes	TCONS_00016307	XLOC_008777	Fam170b	chr14:33647147-33649974	1693
TCONS_00016309	gcKO	WT	219.928	421.59	-0.938806	0.00055	0.00903315	yes	TCONS_00016309	XLOC_008779	Lrrc18	chr14:33772732-34003162	1249
TCONS_00016360	gcKO	WT	17.2742	30.2169	-0.806701	0.0016	0.0234468	yes	TCONS_00016360	XLOC_008802	Dydc1	chr14:41886172-41905637	995
TCONS_00016370	gcKO	WT	28.2141	57.2414	-1.02062	5e-05	0.00104398	yes	TCONS_00016370	XLOC_008809	BC061237	chr14:45119792-45126016	899
TCONS_00016472	gcKO	WT	6.81286	11.888	-0.803083	0.00275	0.037096	yes	TCONS_00016472	XLOC_008864	Gm5622	chr14:52172464-52282628	1581
TCONS_00016505	gcKO	WT	77.9833	33.7273	1.20922	7e-04	0.0113235	yes	TCONS_00016505	XLOC_008878	Abhd4	chr14:54873803-54889381	2406
TCONS_00016508	gcKO	WT	10.2668	4.92924	1.0584	0.00375	0.0479163	yes	TCONS_00016508	XLOC_008879	Oxa1l	chr14:54980524-55036539	2534
TCONS_00016515	gcKO	WT	11.7744	4.45106	1.40323	5e-05	0.00104398	yes	TCONS_00016515	XLOC_008882	Lrp10	chr14:55082983-55089128	3012
TCONS_00016524	gcKO	WT	9.7682	4.7127	1.05138	0.0014	0.0209805	yes	TCONS_00016524	XLOC_008890	Bcl2l2	chr14:55502261-55507142	3461
TCONS_00016554	gcKO	WT	13.0218	5.36413	1.27935	0.00085	0.0135078	yes	TCONS_00016554	XLOC_008905	Fitm1	chr14:56194510-56195789	912
TCONS_00016585	gcKO	WT	2.33037	1.33316	0.805246	0.0027	0.0365208	yes	TCONS_00016585	XLOC_008924	Parp4	chr14:57194455-57278635	6391
TCONS_00016660	gcKO	WT	4.91026	2.28299	1.10454	0.0034	0.0441689	yes	TCONS_00016660	XLOC_008962	NA	chr14:63958322-63964457	1923
TCONS_00016680	gcKO	WT	45.5562	89.5022	-0.97426	5e-05	0.00104398	yes	TCONS_00016680	XLOC_008971	Prss52	chr14:64723159-64732588	1023
TCONS_00016696	gcKO	WT	3.01346	1.58884	0.923018	0.00145	0.0216237	yes	TCONS_00016696	XLOC_008977	Zfp395	chr14:65977512-66017767	4229
TCONS_00016702	gcKO	WT	17.6961	11.079	0.675555	0.0026	0.0353488	yes	TCONS_00016702	XLOC_008979	Scara5	chr14:66285239-66383663	3794
TCONS_00016705	gcKO	WT	586.09	345.831	0.761053	0.00185	0.0265711	yes	TCONS_00016705	XLOC_008982	Clu	chr14:66587319-66600382	1808
TCONS_00016852	gcKO	WT	8.64244	14.0629	-0.702319	0.00205	0.0288285	yes	TCONS_00016852	XLOC_009054	Zbtbd6	chr14:79851641-79854623	2982
TCONS_00016894	gcKO	WT	10.913	5.87912	0.892262	0.0035	0.0452754	yes	TCONS_00016894	XLOC_009070	Klf5	chr14:99694059-99712753	1378
TCONS_00016984	gcKO	WT	4.16875	1.78147	1.22608	5e-05	0.00104398	yes	TCONS_00016984	XLOC_009112	Rap2a	chr14:120877682-120906414	4172
TCONS_00017025	gcKO	WT	27.7934	46.5297	-0.743389	0.00135	0.0203078	yes	TCONS_00017025	XLOC_009132	Gm5797	chr14:8156501-8164909	997
TCONS_00017064	gcKO	WT	195.254	0.001	16.575	5e-05	0.00104398	yes	TCONS_00017064	XLOC_009145	NA	chr14:14647547-14656308	119
TCONS_00017104	gcKO	WT	25.7126	46.4019	-0.851683	0.00035	0.00592226	yes	TCONS_00017104	XLOC_009166	Dnajc9	chr14:21203823-21208132	1631
TCONS_00017251	gcKO	WT	4.67912	1.96688	1.2499	0.00115	0.0176741	yes	TCONS_00017251	XLOC_009215	Il17rb	chr14:30809353-30822082	2061
TCONS_00017269	gcKO	WT	9.15267	5.35352	0.773593	0.00055	0.00903315	yes	TCONS_00017269	XLOC_009225	Nisch	chr14:31984113-32020012	5586
TCONS_00017292	gcKO	WT	69.5159	123.181	-0.825356	0.0014	0.0209805	yes	TCONS_00017292	XLOC_009236	1700024G13Rik	chr14:33189687-33201559	398
TCONS_00017363	gcKO	WT	35.1996	71.4636	-1.02163	5e-05	0.00104398	yes	TCONS_00017363	XLOC_009269	Dydc2	chr14:41862497-41882363	592
TCONS_00017368	gcKO	WT	27.2102	67.8048	-1.31721	5e-05	0.00104398	yes	TCONS_00017368	XLOC_009274	1700001F09Rik	chr14:44020916-44026344	883
TCONS_00017377	gcKO	WT	16.2896	46.3474	-1.50848	0.0036	0.0461779	yes	TCONS_00017377	XLOC_009281	1700047E10Rik	chr14:44751518-44790902	514
TCONS_00017408	gcKO	WT	11.7413	4.88018	1.26641	5e-05	0.00104398	yes	TCONS_00017408	XLOC_009296	Cnih	chr14:47395241-47408032	1484
TCONS_00017421	gcKO	WT	45.4178	12.8339	1.82322	0.0017	0.0247116	yes	TCONS_00017421	XLOC_009302	NA	chr14:48376701-48377178	361
TCONS_00017424	gcKO	WT	26.0765	46.0012	-0.818897	0.00035	0.00592226	yes	TCONS_00017424	XLOC_009305	1700011H14Rik	chr14:49846033-49865103	1167
TCONS_00017520	gcKO	WT	7.47687	3.67744	1.02353	5e-05	0.00104398	yes	TCONS_00017520	XLOC_009366	Ajuba	chr14:55186305-55196498	3503
TCONS_00017542	gcKO	WT	18.4476	5.02282	1.87665	5e-05	0.00104398	yes	TCONS_00017542	XLOC_009372	Slc7a8	chr14:55341051-55400774	4034
TCONS_00017655	gcKO	WT	124.902	64.9966	0.94235	5e-05	0.00104398	yes	TCONS_00017655	XLOC_009428	Gm5142	chr14:59777339-59797586	626
TCONS_00017883	gcKO	WT	25.0581	43.3304	-0.790078	0.00165	0.0240995	yes	TCONS_00017883	XLOC_009514	NA	chr14:71393672-71394448	671
TCONS_00017921	gcKO	WT	3.73991	17.0342	-2.18706	1e-04	0.00182757	yes	TCONS_00017921	XLOC_009533	Serp2	chr14:76932616-76956730	900
TCONS_00017929	gcKO	WT	253.829	402.86	-0.66642	0.002	0.0281652	yes	TCONS_00017929	XLOC_009538	Dnajc15	chr14:78225906-78274909	648
TCONS_00017962	gcKO	WT	26.4899	16.7396	0.662146	0.0026	0.0353488	yes	TCONS_00017962	XLOC_009552	Gm10845	chr14:80260327-80268983	3389
TCONS_00018059	gcKO	WT	391.8	0.001	17.5798	5e-05	0.00104398	yes	TCONS_00018059	XLOC_009593	NA	chr14:118852105-118852678	87
TCONS_00018083	gcKO	WT	5.43668	2.76578	0.974783	0.00385	0.0489108	yes	TCONS_00018083	XLOC_009600	Stk24	chr14:121683317-121778452	4819
TCONS_00018134	gcKO	WT	601.924	0.001	18.1992	5e-05	0.00104398	yes	TCONS_00018134	XLOC_009616	NA	chr14:3215058-3215138	80
TCONS_00018135	gcKO	WT	543.736	0.001	18.0525	5e-05	0.00104398	yes	TCONS_00018135	XLOC_009617	NA	chr14:5089181-5089280	99
TCONS_00018137	gcKO	WT	283.689	0.001	17.114	5e-05	0.00104398	yes	TCONS_00018137	XLOC_009619	NA	chr14:7141012-7141111	99
TCONS_00018138	gcKO	WT	881.267	0.001	18.7492	5e-05	0.00104398	yes	TCONS_00018138	XLOC_009620	NA	chr14:7328321-7328406	85
TCONS_00018139	gcKO	WT	747.981	0.001	18.5126	5e-05	0.00104398	yes	TCONS_00018139	XLOC_009621	NA	chr14:7669378-7669465	87
TCONS_00018149	gcKO	WT	748.969	0.001	18.5145	5e-05	0.00104398	yes	TCONS_00018149	XLOC_009631	NA	chr14:13140464-13140539	75
TCONS_00018153	gcKO	WT	1074.58	0.001	19.0353	5e-05	0.00104398	yes	TCONS_00018153	XLOC_009635	NA	chr14:15979753-15979828	75
TCONS_00018157	gcKO	WT	1004.42	0.001	18.9379	5e-05	0.00104398	yes	TCONS_00018157	XLOC_009639	NA	chr14:16747219-16747290	71
TCONS_00018161	gcKO	WT	431.055	0.001	17.7175	5e-05	0.00104398	yes	TCONS_00018161	XLOC_009643	NA	chr14:17913801-17913890	89
TCONS_00018163	gcKO	WT	1795.72	0.001	19.7761	5e-05	0.00104398	yes	TCONS_00018163	XLOC_009645	NA	chr14:18235757-18235813	56
TCONS_00018166	gcKO	WT	1114.9	0.001	19.0885	5e-05	0.00104398	yes	TCONS_00018166	XLOC_009648	NA	chr14:20130850-20130912	62
TCONS_00018167	gcKO	WT	274.703	0.001	17.0675	5e-05	0.00104398	yes	TCONS_00018167	XLOC_009649	NA	chr14:20144106-20144218	112
TCONS_00018168	gcKO	WT	334.677	0.001	17.3524	5e-05	0.00104398	yes	TCONS_00018168	XLOC_009650	NA	chr14:20387124-20387218	94
TCONS_00018169	gcKO	WT	1580.1	0.001	19.5916	5e-05	0.00104398	yes	TCONS_00018169	XLOC_009651	NA	chr14:20444062-20444139	77
TCONS_00018174	gcKO	WT	1123.01	0.001	19.0989	5e-05	0.00104398	yes	TCONS_00018174	XLOC_009656	NA	chr14:20925520-20925604	84
TCONS_00018176	gcKO	WT	1404.05	0.001	19.4212	5e-05	0.00104398	yes	TCONS_00018176	XLOC_009658	NA	chr14:20949276-20949341	65
TCONS_00018180	gcKO	WT	817.086	0.001	18.6401	5e-05	0.00104398	yes	TCONS_00018180	XLOC_009662	NA	chr14:21620453-21620564	111
TCONS_00018209	gcKO	WT	835.021	0.001	18.6715	5e-05	0.00104398	yes	TCONS_00018209	XLOC_009691	NA	chr14:25469719-25469803	84
TCONS_00018210	gcKO	WT	583.934	0.001	18.1554	5e-05	0.00104398	yes	TCONS_00018210	XLOC_009692	NA	chr14:25479035-25479125	90
TCONS_00018215	gcKO	WT	625.621	0.001	18.2549	5e-05	0.00104398	yes	TCONS_00018215	XLOC_009697	NA	chr14:25964687-25964764	77
TCONS_00018217	gcKO	WT	637.616	0.001	18.2823	5e-05	0.00104398	yes	TCONS_00018217	XLOC_009699	NA	chr14:26272428-26272507	79
TCONS_00018227	gcKO	WT	0.001	150.6	-16.2004	3e-04	0.00513973	yes	TCONS_00018227	XLOC_009709	NA	chr14:29365165-29365272	107
TCONS_00018229	gcKO	WT	1411.13	0.001	19.4284	5e-05	0.00104398	yes	TCONS_00018229	XLOC_009711	NA	chr14:30775765-30775837	72
TCONS_00018230	gcKO	WT	596.444	0.001	18.186	5e-05	0.00104398	yes	TCONS_00018230	XLOC_009712	NA	chr14:30776572-30776656	84
TCONS_00018238	gcKO	WT	1896.81	0.001	19.8551	5e-05	0.00104398	yes	TCONS_00018238	XLOC_009720	NA	chr14:33305159-33305214	55
TCONS_00018240	gcKO	WT	1061.1	0.001	19.0171	5e-05	0.00104398	yes	TCONS_00018240	XLOC_009722	NA	chr14:33654220-33654294	74
TCONS_00018241	gcKO	WT	355.434	0.001	17.4392	5e-05	0.00104398	yes	TCONS_00018241	XLOC_009723	NA	chr14:34401479-34401586	107
TCONS_00018247	gcKO	WT	732.861	0.001	18.4832	5e-05	0.00104398	yes	TCONS_00018247	XLOC_009729	NA	chr14:35047065-35047164	99
TCONS_00018250	gcKO	WT	2544.53	0.001	20.279	5e-05	0.00104398	yes	TCONS_00018250	XLOC_009732	NA	chr14:36514316-36514387	71
TCONS_00018255	gcKO	WT	662.758	0.001	18.3381	1e-04	0.00182757	yes	TCONS_00018255	XLOC_009737	NA	chr14:38278159-38278233	74
TCONS_00018257	gcKO	WT	1211.01	0.001	19.2078	5e-05	0.00104398	yes	TCONS_00018257	XLOC_009739	NA	chr14:39140741-39140828	87
TCONS_00018258	gcKO	WT	514.477	0.001	17.9727	5e-05	0.00104398	yes	TCONS_00018258	XLOC_009740	NA	chr14:39168385-39168467	82
TCONS_00018259	gcKO	WT	0.001	355.994	-17.4415	5e-05	0.00104398	yes	TCONS_00018259	XLOC_009741	NA	chr14:40527564-40527663	99
TCONS_00018261	gcKO	WT	314.607	0.001	17.2632	5e-05	0.00104398	yes	TCONS_00018261	XLOC_009743	NA	chr14:41602585-41602699	114
TCONS_00018262	gcKO	WT	0.001	71.7522	-15.1308	5e-04	0.00825634	yes	TCONS_00018262	XLOC_009744	NA	chr14:41708185-41708320	135
TCONS_00018264	gcKO	WT	904.972	0.001	18.7875	5e-05	0.00104398	yes	TCONS_00018264	XLOC_009746	NA	chr14:42195442-42195534	92
TCONS_00018266	gcKO	WT	549.756	0.001	18.0684	5e-05	0.00104398	yes	TCONS_00018266	XLOC_009748	NA	chr14:42334628-42334732	104
TCONS_00018271	gcKO	WT	0.001	155.752	-16.2489	0.00155	0.022832	yes	TCONS_00018271	XLOC_009753	NA	chr14:43926468-43926570	102
TCONS_00018297	gcKO	WT	1218.7	0.001	19.2169	5e-05	0.00104398	yes	TCONS_00018297	XLOC_009779	NA	chr14:47450140-47450212	72
TCONS_00018304	gcKO	WT	737.704	0.001	18.4927	5e-05	0.00104398	yes	TCONS_00018304	XLOC_009786	NA	chr14:48431230-48431303	73
TCONS_00018307	gcKO	WT	983.605	0.001	18.9077	5e-05	0.00104398	yes	TCONS_00018307	XLOC_009789	NA	chr14:49179193-49179266	73
TCONS_00018310	gcKO	WT	416.293	0.001	17.6672	5e-05	0.00104398	yes	TCONS_00018310	XLOC_009792	NA	chr14:49489784-49489897	113
TCONS_00018315	gcKO	WT	625.976	0.001	18.2558	5e-05	0.00104398	yes	TCONS_00018315	XLOC_009797	NA	chr14:54715874-54715970	96
TCONS_00018316	gcKO	WT	2319.71	0.001	20.1455	5e-05	0.00104398	yes	TCONS_00018316	XLOC_009798	NA	chr14:54840244-54840311	67
TCONS_00018317	gcKO	WT	302.743	0.001	17.2077	5e-05	0.00104398	yes	TCONS_00018317	XLOC_009799	NA	chr14:54846974-54847091	117
TCONS_00018318	gcKO	WT	1520.32	0.001	19.5359	5e-05	0.00104398	yes	TCONS_00018318	XLOC_009800	NA	chr14:55105117-55105179	62
TCONS_00018319	gcKO	WT	623.632	0.001	18.2503	5e-05	0.00104398	yes	TCONS_00018319	XLOC_009801	NA	chr14:55439482-55439563	81
TCONS_00018320	gcKO	WT	177.296	0.001	16.4358	5e-05	0.00104398	yes	TCONS_00018320	XLOC_009802	NA	chr14:55825961-55826081	120
TCONS_00018329	gcKO	WT	474.126	0.001	17.8549	5e-05	0.00104398	yes	TCONS_00018329	XLOC_009811	NA	chr14:57622458-57622552	94
TCONS_00018332	gcKO	WT	730.996	0.001	18.4795	1e-04	0.00182757	yes	TCONS_00018332	XLOC_009814	NA	chr14:58286767-58286836	69
TCONS_00018334	gcKO	WT	1302.91	0.001	19.3133	5e-05	0.00104398	yes	TCONS_00018334	XLOC_009816	NA	chr14:58663474-58663550	76
TCONS_00018341	gcKO	WT	791.08	0.001	18.5935	5e-05	0.00104398	yes	TCONS_00018341	XLOC_009822	NA	chr14:60819237-60819340	103
TCONS_00018345	gcKO	WT	1179.88	0.001	19.1702	5e-05	0.00104398	yes	TCONS_00018345	XLOC_009826	NA	chr14:60962442-60962527	85
TCONS_00018351	gcKO	WT	599.935	0.001	18.1944	5e-05	0.00104398	yes	TCONS_00018351	XLOC_009832	NA	chr14:61710097-61710183	86
TCONS_00018355	gcKO	WT	768.219	0.001	18.5512	5e-05	0.00104398	yes	TCONS_00018355	XLOC_009836	NA	chr14:62326810-62326900	90
TCONS_00018357	gcKO	WT	1217.6	0.001	19.2156	5e-05	0.00104398	yes	TCONS_00018357	XLOC_009838	NA	chr14:63083631-63083709	78
TCONS_00018358	gcKO	WT	1059.26	0.001	19.0146	5e-05	0.00104398	yes	TCONS_00018358	XLOC_009839	NA	chr14:63105118-63105197	79
TCONS_00018361	gcKO	WT	706.562	0.001	18.4305	5e-05	0.00104398	yes	TCONS_00018361	XLOC_009842	NA	chr14:63978213-63978310	97
TCONS_00018363	gcKO	WT	819.217	0.001	18.6439	5e-05	0.00104398	yes	TCONS_00018363	XLOC_009844	NA	chr14:64447626-64447713	87
TCONS_00018366	gcKO	WT	1459.08	0.001	19.4766	1e-04	0.00182757	yes	TCONS_00018366	XLOC_009847	NA	chr14:64668785-64668840	55
TCONS_00018371	gcKO	WT	701.777	0.001	18.4207	5e-05	0.00104398	yes	TCONS_00018371	XLOC_009852	NA	chr14:66579819-66579905	86
TCONS_00018373	gcKO	WT	0.001	761.7	-18.5389	0.0033	0.0430246	yes	TCONS_00018373	XLOC_009854	NA	chr14:67780496-67780554	58
TCONS_00018374	gcKO	WT	7970.63	0.001	21.9263	5e-05	0.00104398	yes	TCONS_00018374	XLOC_009855	NA	chr14:68102477-68102516	39
TCONS_00018375	gcKO	WT	1381.33	0.001	19.3976	1e-04	0.00182757	yes	TCONS_00018375	XLOC_009856	NA	chr14:68362859-68362915	56
TCONS_00018381	gcKO	WT	2348.25	0.001	20.1632	5e-05	0.00104398	yes	TCONS_00018381	XLOC_009862	NA	chr14:69990775-69990831	56
TCONS_00018386	gcKO	WT	367.986	0.001	17.4893	5e-05	0.00104398	yes	TCONS_00018386	XLOC_009867	NA	chr14:71846885-71847001	116
TCONS_00018388	gcKO	WT	1113.36	0.001	19.0865	5e-05	0.00104398	yes	TCONS_00018388	XLOC_009869	NA	chr14:72440299-72440383	84
TCONS_00018390	gcKO	WT	2046.78	0.001	19.9649	5e-05	0.00104398	yes	TCONS_00018390	XLOC_009871	NA	chr14:73208783-73208852	69
TCONS_00018393	gcKO	WT	2931.28	0.001	20.4831	5e-05	0.00104398	yes	TCONS_00018393	XLOC_009874	NA	chr14:74003891-74003945	54
TCONS_00018396	gcKO	WT	6.92283	0.001	11.7574	5e-04	0.00825634	yes	TCONS_00018396	XLOC_009877	NA	chr14:76097292-76097569	277
TCONS_00018408	gcKO	WT	941.428	0.001	18.8445	1e-04	0.00182757	yes	TCONS_00018408	XLOC_009889	NA	chr14:78447788-78447853	65
TCONS_00018410	gcKO	WT	835.971	0.001	18.6731	5e-05	0.00104398	yes	TCONS_00018410	XLOC_009891	NA	chr14:78635118-78635213	95
TCONS_00018423	gcKO	WT	353.905	0.001	17.433	5e-05	0.00104398	yes	TCONS_00018423	XLOC_009904	NA	chr14:80993781-80993884	103
TCONS_00018424	gcKO	WT	1053.03	0.001	19.0061	5e-05	0.00104398	yes	TCONS_00018424	XLOC_009905	NA	chr14:81795162-81795227	65
TCONS_00018425	gcKO	WT	1196.07	0.001	19.1899	5e-05	0.00104398	yes	TCONS_00018425	XLOC_009906	NA	chr14:84029742-84029806	64
TCONS_00018430	gcKO	WT	1413.93	0.001	19.4313	5e-05	0.00104398	yes	TCONS_00018430	XLOC_009911	NA	chr14:86892280-86892353	73
TCONS_00018435	gcKO	WT	1381.33	0.001	19.3976	1e-04	0.00182757	yes	TCONS_00018435	XLOC_009916	NA	chr14:88486779-88486835	56
TCONS_00018437	gcKO	WT	962.136	0.001	18.8759	5e-05	0.00104398	yes	TCONS_00018437	XLOC_009918	NA	chr14:92670829-92670901	72
TCONS_00018439	gcKO	WT	3.41385	7.04338	-1.04465	0.00125	0.0189833	yes	TCONS_00018439	XLOC_009920	NA	chr14:95819262-95821112	1850
TCONS_00018440	gcKO	WT	2691.34	0.001	20.3599	1e-04	0.00182757	yes	TCONS_00018440	XLOC_009921	NA	chr14:95878546-95878591	45
TCONS_00018442	gcKO	WT	1439.88	0.001	19.4575	5e-05	0.00104398	yes	TCONS_00018442	XLOC_009923	NA	chr14:99230648-99230705	57
TCONS_00018443	gcKO	WT	1028.18	0.001	18.9717	5e-05	0.00104398	yes	TCONS_00018443	XLOC_009924	NA	chr14:99317202-99317290	88
TCONS_00018444	gcKO	WT	367.72	0.001	17.4883	5e-05	0.00104398	yes	TCONS_00018444	XLOC_009925	NA	chr14:100230287-100230392	105
TCONS_00018447	gcKO	WT	1127.82	0.001	19.1051	5e-05	0.00104398	yes	TCONS_00018447	XLOC_009928	NA	chr14:101090237-101090304	67
TCONS_00018448	gcKO	WT	816.304	0.001	18.6387	5e-05	0.00104398	yes	TCONS_00018448	XLOC_009929	NA	chr14:101587133-101587235	102
TCONS_00018452	gcKO	WT	1570.78	0.001	19.5831	5e-05	0.00104398	yes	TCONS_00018452	XLOC_009933	NA	chr14:103773296-103773353	57
TCONS_00018453	gcKO	WT	224.72	0.001	16.7778	5e-05	0.00104398	yes	TCONS_00018453	XLOC_009934	NA	chr14:103814020-103814134	114
TCONS_00018454	gcKO	WT	0.001	535.349	-18.0301	0.00195	0.0275981	yes	TCONS_00018454	XLOC_009935	NA	chr14:104127472-104127539	67
TCONS_00018459	gcKO	WT	979654	579371	0.757785	0.0026	0.0353488	yes	TCONS_00018459	XLOC_009940	NA	chr14:104814478-104814502	24
TCONS_00018460	gcKO	WT	686.763	0.001	18.3895	5e-05	0.00104398	yes	TCONS_00018460	XLOC_009941	NA	chr14:105580983-105581075	92
TCONS_00018462	gcKO	WT	840.882	0.001	18.6815	5e-05	0.00104398	yes	TCONS_00018462	XLOC_009943	NA	chr14:105719018-105719086	68
TCONS_00018468	gcKO	WT	1199.1	0.001	19.1935	5e-05	0.00104398	yes	TCONS_00018468	XLOC_009949	NA	chr14:106463654-106463731	77
TCONS_00018471	gcKO	WT	739.248	0.001	18.4957	5e-05	0.00104398	yes	TCONS_00018471	XLOC_009952	NA	chr14:106907850-106907932	82
TCONS_00018472	gcKO	WT	445.452	0.001	17.7649	1e-04	0.00182757	yes	TCONS_00018472	XLOC_009953	NA	chr14:107888401-107888482	81
TCONS_00018473	gcKO	WT	28873	0.001	23.7832	5e-05	0.00104398	yes	TCONS_00018473	XLOC_009954	NA	chr14:108403450-108403474	24
TCONS_00018475	gcKO	WT	825.299	0.001	18.6546	5e-05	0.00104398	yes	TCONS_00018475	XLOC_009956	NA	chr14:109330138-109330212	74
TCONS_00018476	gcKO	WT	837.542	0.001	18.6758	1e-04	0.00182757	yes	TCONS_00018476	XLOC_009957	NA	chr14:109332447-109332513	66
TCONS_00018477	gcKO	WT	789911	475602	0.731935	0.00305	0.0406322	yes	TCONS_00018477	XLOC_009958	NA	chr14:110203411-110203468	57
TCONS_00018478	gcKO	WT	1472.08	0.001	19.4894	5e-05	0.00104398	yes	TCONS_00018478	XLOC_009959	NA	chr14:112349560-112349624	64
TCONS_00018480	gcKO	WT	1296.55	0.001	19.3062	5e-05	0.00104398	yes	TCONS_00018480	XLOC_009961	NA	chr14:113110700-113110759	59
TCONS_00018484	gcKO	WT	140.818	0.001	16.1035	5e-05	0.00104398	yes	TCONS_00018484	XLOC_009965	NA	chr14:113708022-113708159	137
TCONS_00018485	gcKO	WT	1258.97	0.001	19.2638	5e-05	0.00104398	yes	TCONS_00018485	XLOC_009966	NA	chr14:114191592-114191662	70
TCONS_00018491	gcKO	WT	809.211	0.001	18.6262	5e-05	0.00104398	yes	TCONS_00018491	XLOC_009972	NA	chr14:118675984-118676056	72
TCONS_00018505	gcKO	WT	877.53	0.001	18.7431	1e-04	0.00182757	yes	TCONS_00018505	XLOC_009986	NA	chr14:121122703-121122768	65
TCONS_00018527	gcKO	WT	66.2862	145.366	-1.1329	5e-05	0.00104398	yes	TCONS_00018527	XLOC_009995	Rpl37	chr15:5066612-5069140	867
TCONS_00018645	gcKO	WT	3.14618	1.54748	1.02321	5e-05	0.00104398	yes	TCONS_00018645	XLOC_010049	Sema5a	chr15:32174567-32626096	10809
TCONS_00018647	gcKO	WT	4.63019	1.42718	1.69721	0.0026	0.0353488	yes	TCONS_00018647	XLOC_010050	Sdc2	chr15:32850477-32964516	2920
TCONS_00018656	gcKO	WT	55.8144	31.7586	0.81347	0.0016	0.0234468	yes	TCONS_00018656	XLOC_010053	Laptm4b	chr15:34167780-34214060	1897
TCONS_00018667	gcKO	WT	5.06043	2.05729	1.2981	0.00385	0.0489108	yes	TCONS_00018667	XLOC_010059	Osr2	chr15:35225866-35233060	1710
TCONS_00018683	gcKO	WT	540.02	941.324	-0.801677	0.00085	0.0135078	yes	TCONS_00018683	XLOC_010067	Odf1	chr15:38148957-38156490	1105
TCONS_00018684	gcKO	WT	23.8023	37.3838	-0.65129	0.00225	0.0312537	yes	TCONS_00018684	XLOC_010068	Atp6v1c1	chr15:38591658-38622199	2098
TCONS_00018727	gcKO	WT	6.75926	0.001	11.7229	5e-05	0.00104398	yes	TCONS_00018727	XLOC_010083	NA	chr15:43701615-43893553	1018
TCONS_00018755	gcKO	WT	146.783	63.4413	1.21018	5e-05	0.00104398	yes	TCONS_00018755	XLOC_010095	Aard	chr15:51871652-51877269	1348
TCONS_00018785	gcKO	WT	67.2213	113.326	-0.75348	0.0028	0.0376809	yes	TCONS_00018785	XLOC_010112	Rnf139	chr15:58720539-58765285	4432
TCONS_00018859	gcKO	WT	10.9807	2.72358	2.011	0.00065	0.0105706	yes	TCONS_00018859	XLOC_010148	Ly6e	chr15:74785480-74790335	2070
TCONS_00019033	gcKO	WT	7.20636	17.3531	-1.26773	0.00055	0.00903315	yes	TCONS_00019033	XLOC_010230	4930483J18Rik	chr15:81021219-81023187	1094
TCONS_00019044	gcKO	WT	8.98012	4.84905	0.888896	0.00065	0.0105706	yes	TCONS_00019044	XLOC_010235	Ep300	chr15:81416502-81482507	8749
TCONS_00019065	gcKO	WT	8.3341	17.5618	-1.07525	5e-05	0.00104398	yes	TCONS_00019065	XLOC_010245	Ccdc134	chr15:81958351-81972632	2045
TCONS_00019088	gcKO	WT	23144	2902.38	2.99533	5e-05	0.00104398	yes	TCONS_00019088	XLOC_010258	Rnu12	chr15:82980074-82980224	150
TCONS_00019090	gcKO	WT	12.7937	5.86656	1.12471	0.0036	0.0461779	yes	TCONS_00019090	XLOC_010260	Tspo	chr15:83394002-83404633	856
TCONS_00019094	gcKO	WT	2.87404	1.42414	1.01248	0.00165	0.0240995	yes	TCONS_00019094	XLOC_010264	Parvb	chr15:84062472-84146039	3705
TCONS_00019299	gcKO	WT	15.8978	3.20698	2.30918	5e-05	0.00104398	yes	TCONS_00019299	XLOC_010356	Aqp2	chr15:99409486-99414976	1416
TCONS_00019306	gcKO	WT	20.217	7.67137	1.3979	5e-05	0.00104398	yes	TCONS_00019306	XLOC_010361	Gpd1	chr15:99548023-99555438	2785
TCONS_00019347	gcKO	WT	21.0028	7.78697	1.43133	5e-05	0.00104398	yes	TCONS_00019347	XLOC_010381	9430023L20Rik	chr15:101114731-101121365	1230
TCONS_00019359	gcKO	WT	4.86679	1.84888	1.39584	5e-05	0.00104398	yes	TCONS_00019359	XLOC_010392	Tenc1	chr15:101933418-101946832	4707
TCONS_00019379	gcKO	WT	114.81	68.5625	0.743748	4e-04	0.00672247	yes	TCONS_00019379	XLOC_010401	Amhr2	chr15:102275797-102285070	1947
TCONS_00019380	gcKO	WT	9.34858	2.13019	2.13324	0.00075	0.0120733	yes	TCONS_00019380	XLOC_010402	Prr13	chr15:102289600-102293237	1111
TCONS_00019511	gcKO	WT	15.7068	7.29448	1.10641	5e-05	0.00104398	yes	TCONS_00019511	XLOC_010458	Basp1	chr15:25293031-25343519	1855
TCONS_00019542	gcKO	WT	43347.7	18423.2	1.23443	5e-05	0.00104398	yes	TCONS_00019542	XLOC_010473	Snord123	chr15:32170322-32174417	88
TCONS_00019550	gcKO	WT	13.0347	0.001	12.6702	5e-05	0.00104398	yes	TCONS_00019550	XLOC_010479	NA	chr15:34088488-34088935	317
TCONS_00019621	gcKO	WT	4.04134	0.723371	2.48039	0.00255	0.0347881	yes	TCONS_00019621	XLOC_010515	Abra	chr15:41696838-41701266	1762
TCONS_00019692	gcKO	WT	15.2685	3.0344	2.33069	9e-04	0.0142341	yes	TCONS_00019692	XLOC_010557	NA	chr15:58393036-58394422	712
TCONS_00019982	gcKO	WT	8.42803	5.33373	0.659951	0.00265	0.0359424	yes	TCONS_00019982	XLOC_010671	Myh9	chr15:77591018-77672545	7371
TCONS_00019996	gcKO	WT	50.7074	18.4184	1.461	5e-05	0.00104398	yes	TCONS_00019996	XLOC_010680	Tst	chr15:78229985-78236289	1096
TCONS_00020003	gcKO	WT	1.62562	0.399066	2.02357	0.00255	0.0347881	yes	TCONS_00020003	XLOC_010683	Sstr3	chr15:78367444-78374775	3928
TCONS_00020143	gcKO	WT	4.47032	12.4738	-1.48024	0.00035	0.00592226	yes	TCONS_00020143	XLOC_010746	Cyp2d26	chr15:82620531-82625430	1409
TCONS_00020164	gcKO	WT	18.1504	11.2995	0.683694	0.0032	0.0423041	yes	TCONS_00020164	XLOC_010753	Cyb5r3	chr15:82983931-83002638	2030
TCONS_00020190	gcKO	WT	6.48928	3.87636	0.743206	0.002	0.0281652	yes	TCONS_00020190	XLOC_010760	Ttll12	chr15:83405523-83425587	3770
TCONS_00020295	gcKO	WT	68.1156	121.917	-0.839833	0.00035	0.00592226	yes	TCONS_00020295	XLOC_010796	Syce3	chr15:89220604-89240934	448
TCONS_00020341	gcKO	WT	5.46366	2.79994	0.964221	0.00025	0.00433359	yes	TCONS_00020341	XLOC_010810	Prickle1	chr15:93329544-93426322	4085
TCONS_00020424	gcKO	WT	337.958	603.218	-0.835834	2e-04	0.00353476	yes	TCONS_00020424	XLOC_010841	H1fnt	chr15:98086412-98087738	1326
TCONS_00020443	gcKO	WT	22.5875	12.6826	0.832624	0.00015	0.00268331	yes	TCONS_00020443	XLOC_010857	Arf3	chr15:98568056-98593549	3481
TCONS_00020458	gcKO	WT	31.1834	8.06394	1.95109	5e-05	0.00104398	yes	TCONS_00020458	XLOC_010865	Tuba1a	chr15:98761857-98784092	1719
TCONS_00020471	gcKO	WT	3.11264	1.65631	0.909759	0.00235	0.032416	yes	TCONS_00020471	XLOC_010870	Nckap5l	chr15:99252464-99288179	4854
TCONS_00020514	gcKO	WT	45.1747	0.001	14.4633	5e-05	0.00104398	yes	TCONS_00020514	XLOC_010889	NA	chr15:100994621-100997162	206
TCONS_00020543	gcKO	WT	6.6795	36.2926	-2.44169	5e-05	0.00104398	yes	TCONS_00020543	XLOC_010913	Krt76	chr15:101714781-101723351	2312
TCONS_00020583	gcKO	WT	12.1721	4.49282	1.43768	0.0012	0.0183009	yes	TCONS_00020583	XLOC_010938	Zfp385a	chr15:103144325-103170517	2291
TCONS_00020594	gcKO	WT	358.312	0.001	17.4509	5e-05	0.00104398	yes	TCONS_00020594	XLOC_010944	NA	chr15:3108703-3108795	92
TCONS_00020595	gcKO	WT	1675.08	0.001	19.6758	5e-05	0.00104398	yes	TCONS_00020595	XLOC_010945	NA	chr15:3186465-3186531	66
TCONS_00020598	gcKO	WT	244.211	0.001	16.8978	1e-04	0.00182757	yes	TCONS_00020598	XLOC_010948	NA	chr15:5727506-5727604	98
TCONS_00020601	gcKO	WT	1203.71	0.001	19.1991	5e-05	0.00104398	yes	TCONS_00020601	XLOC_010951	NA	chr15:6249635-6249714	79
TCONS_00020603	gcKO	WT	585.684	0.001	18.1598	5e-05	0.00104398	yes	TCONS_00020603	XLOC_010953	NA	chr15:7079001-7079095	94
TCONS_00020606	gcKO	WT	417.318	0.001	17.6708	5e-05	0.00104398	yes	TCONS_00020606	XLOC_010956	NA	chr15:8058229-8058325	96
TCONS_00020612	gcKO	WT	230.147	0.001	16.8122	5e-05	0.00104398	yes	TCONS_00020612	XLOC_010962	NA	chr15:10496464-10496577	113
TCONS_00020617	gcKO	WT	622.969	0.001	18.2488	5e-05	0.00104398	yes	TCONS_00020617	XLOC_010967	NA	chr15:12043945-12044047	102
TCONS_00020626	gcKO	WT	493.385	0.001	17.9124	5e-05	0.00104398	yes	TCONS_00020626	XLOC_010976	NA	chr15:14394246-14394359	113
TCONS_00020629	gcKO	WT	640.967	0.001	18.2899	5e-05	0.00104398	yes	TCONS_00020629	XLOC_010979	NA	chr15:17862504-17862604	100
TCONS_00020631	gcKO	WT	1049.14	0.001	19.0008	5e-05	0.00104398	yes	TCONS_00020631	XLOC_010981	NA	chr15:18465426-18465496	70
TCONS_00020634	gcKO	WT	677.756	0.001	18.3704	5e-05	0.00104398	yes	TCONS_00020634	XLOC_010984	NA	chr15:19802856-19802933	77
TCONS_00020636	gcKO	WT	799.902	0.001	18.6095	1e-04	0.00182757	yes	TCONS_00020636	XLOC_010986	NA	chr15:21893262-21893329	67
TCONS_00020637	gcKO	WT	735.242	0.001	18.4879	5e-05	0.00104398	yes	TCONS_00020637	XLOC_010987	NA	chr15:21950987-21951062	75
TCONS_00020645	gcKO	WT	1490.99	0.001	19.5078	5e-05	0.00104398	yes	TCONS_00020645	XLOC_010995	NA	chr15:26913832-26913893	61
TCONS_00020649	gcKO	WT	1012.06	0.001	18.9489	5e-05	0.00104398	yes	TCONS_00020649	XLOC_010999	NA	chr15:27956438-27956502	64
TCONS_00020657	gcKO	WT	219.618	0.001	16.7446	5e-05	0.00104398	yes	TCONS_00020657	XLOC_011007	NA	chr15:31462772-31462914	142
TCONS_00020670	gcKO	WT	819.217	0.001	18.6439	5e-05	0.00104398	yes	TCONS_00020670	XLOC_011020	NA	chr15:36072497-36072584	87
TCONS_00020673	gcKO	WT	1172.56	0.001	19.1612	5e-05	0.00104398	yes	TCONS_00020673	XLOC_011023	NA	chr15:36350628-36350694	66
TCONS_00020675	gcKO	WT	2355.4	0.001	20.1675	1e-04	0.00182757	yes	TCONS_00020675	XLOC_011025	NA	chr15:36653961-36654008	47
TCONS_00020681	gcKO	WT	329.39	0.001	17.3294	5e-05	0.00104398	yes	TCONS_00020681	XLOC_011031	NA	chr15:38124906-38125015	109
TCONS_00020682	gcKO	WT	497.371	0.001	17.924	5e-05	0.00104398	yes	TCONS_00020682	XLOC_011032	NA	chr15:38128053-38128142	89
TCONS_00020684	gcKO	WT	0.001	148.394	-16.1791	0.00195	0.0275981	yes	TCONS_00020684	XLOC_011034	NA	chr15:38825905-38826006	101
TCONS_00020692	gcKO	WT	799.902	0.001	18.6095	1e-04	0.00182757	yes	TCONS_00020692	XLOC_011042	NA	chr15:40962969-40963036	67
TCONS_00020693	gcKO	WT	801.452	0.001	18.6123	5e-05	0.00104398	yes	TCONS_00020693	XLOC_011043	NA	chr15:40983259-40983337	78
TCONS_00020697	gcKO	WT	669.353	0.001	18.3524	5e-05	0.00104398	yes	TCONS_00020697	XLOC_011047	NA	chr15:41009971-41010065	94
TCONS_00020701	gcKO	WT	1570.78	0.001	19.5831	5e-05	0.00104398	yes	TCONS_00020701	XLOC_011051	NA	chr15:43971627-43971684	57
TCONS_00020703	gcKO	WT	877.53	0.001	18.7431	1e-04	0.00182757	yes	TCONS_00020703	XLOC_011053	NA	chr15:45317131-45317196	65
TCONS_00020706	gcKO	WT	751.361	0.001	18.5191	5e-05	0.00104398	yes	TCONS_00020706	XLOC_011056	NA	chr15:45549839-45549917	78
TCONS_00020708	gcKO	WT	676.228	0.001	18.3672	5e-05	0.00104398	yes	TCONS_00020708	XLOC_011058	NA	chr15:46154001-46154074	73
TCONS_00020709	gcKO	WT	482.283	0.001	17.8795	5e-05	0.00104398	yes	TCONS_00020709	XLOC_011059	NA	chr15:46894652-46894760	108
TCONS_00020718	gcKO	WT	1013.55	0.001	18.951	1e-04	0.00182757	yes	TCONS_00020718	XLOC_011068	NA	chr15:54820055-54820117	62
TCONS_00020721	gcKO	WT	603.719	0.001	18.2035	5e-05	0.00104398	yes	TCONS_00020721	XLOC_011071	NA	chr15:56004972-56005075	103
TCONS_00020733	gcKO	WT	1241.57	0.001	19.2437	1e-04	0.00182757	yes	TCONS_00020733	XLOC_011083	NA	chr15:58465243-58465301	58
TCONS_00020737	gcKO	WT	323.851	0.001	17.305	5e-05	0.00104398	yes	TCONS_00020737	XLOC_011087	NA	chr15:59071157-59071272	115
TCONS_00020738	gcKO	WT	773.209	0.001	18.5605	5e-05	0.00104398	yes	TCONS_00020738	XLOC_011088	NA	chr15:59071586-59071662	76
TCONS_00020742	gcKO	WT	335.821	0.001	17.3573	5e-05	0.00104398	yes	TCONS_00020742	XLOC_011092	NA	chr15:59436101-59436223	122
TCONS_00020744	gcKO	WT	1303.37	0.001	19.3138	5e-05	0.00104398	yes	TCONS_00020744	XLOC_011094	NA	chr15:59779571-59779648	77
TCONS_00020746	gcKO	WT	801.452	0.001	18.6123	5e-05	0.00104398	yes	TCONS_00020746	XLOC_011096	NA	chr15:60845292-60845370	78
TCONS_00020749	gcKO	WT	1171.49	0.001	19.1599	5e-05	0.00104398	yes	TCONS_00020749	XLOC_011099	NA	chr15:63083004-63083065	61
TCONS_00020753	gcKO	WT	4.11604	8.28969	-1.00988	6e-04	0.00979359	yes	TCONS_00020753	XLOC_011103	NA	chr15:63322083-63324574	2491
TCONS_00020755	gcKO	WT	1469.99	0.001	19.4874	5e-05	0.00104398	yes	TCONS_00020755	XLOC_011105	NA	chr15:63466719-63466800	81
TCONS_00020758	gcKO	WT	417.318	0.001	17.6708	5e-05	0.00104398	yes	TCONS_00020758	XLOC_011108	NA	chr15:65618305-65618401	96
TCONS_00020759	gcKO	WT	2070.38	0.001	19.9815	5e-05	0.00104398	yes	TCONS_00020759	XLOC_011109	NA	chr15:65820266-65820345	79
TCONS_00020761	gcKO	WT	1473.15	0.001	19.4905	5e-05	0.00104398	yes	TCONS_00020761	XLOC_011111	NA	chr15:66501473-66501544	71
TCONS_00020762	gcKO	WT	0.001	115.123	-15.8128	5e-04	0.00825634	yes	TCONS_00020762	XLOC_011112	NA	chr15:67309208-67309325	117
TCONS_00020764	gcKO	WT	641.126	0.001	18.2903	5e-05	0.00104398	yes	TCONS_00020764	XLOC_011114	NA	chr15:68170209-68170296	87
TCONS_00020767	gcKO	WT	382.854	0.001	17.5464	0.00025	0.00433359	yes	TCONS_00020767	XLOC_011117	NA	chr15:69089614-69089696	82
TCONS_00020774	gcKO	WT	833283	1.94615e+06	-1.22374	5e-05	0.00104398	yes	TCONS_00020774	XLOC_011124	NA	chr15:73280374-73280398	24
TCONS_00020784	gcKO	WT	505.386	0.001	17.947	5e-05	0.00104398	yes	TCONS_00020784	XLOC_011134	NA	chr15:74490957-74491040	83
TCONS_00020803	gcKO	WT	804.095	0.001	18.617	5e-05	0.00104398	yes	TCONS_00020803	XLOC_011153	NA	chr15:75925231-75925300	69
TCONS_00020805	gcKO	WT	1023.39	0.001	18.9649	5e-05	0.00104398	yes	TCONS_00020805	XLOC_011155	NA	chr15:76094709-76094778	69
TCONS_00020807	gcKO	WT	0.001	180.077	-16.4583	0.00035	0.00592226	yes	TCONS_00020807	XLOC_011157	NA	chr15:76404581-76404685	104
TCONS_00020809	gcKO	WT	589.5	0.001	18.1691	1e-04	0.00182757	yes	TCONS_00020809	XLOC_011159	NA	chr15:76765903-76765977	74
TCONS_00020818	gcKO	WT	521.351	0.001	17.9919	1e-04	0.00182757	yes	TCONS_00020818	XLOC_011168	NA	chr15:78468042-78468119	77
TCONS_00020848	gcKO	WT	601.089	0.001	18.1972	5e-05	0.00104398	yes	TCONS_00020848	XLOC_011198	NA	chr15:79995384-79995462	78
TCONS_00020852	gcKO	WT	1072.85	0.001	19.033	5e-05	0.00104398	yes	TCONS_00020852	XLOC_011202	NA	chr15:80533712-80533797	85
TCONS_00020864	gcKO	WT	463.019	0.001	17.8207	1e-04	0.00182757	yes	TCONS_00020864	XLOC_011214	NA	chr15:82769961-82770041	80
TCONS_00020876	gcKO	WT	565.571	0.001	18.1094	1e-04	0.00182757	yes	TCONS_00020876	XLOC_011226	NA	chr15:84434297-84434372	75
TCONS_00020877	gcKO	WT	1158.38	0.001	19.1437	5e-05	0.00104398	yes	TCONS_00020877	XLOC_011227	NA	chr15:84820529-84820592	63
TCONS_00020881	gcKO	WT	917.326	0.001	18.8071	5e-05	0.00104398	yes	TCONS_00020881	XLOC_011231	NA	chr15:85518766-85518834	68
TCONS_00020886	gcKO	WT	449.173	0.001	17.7769	5e-05	0.00104398	yes	TCONS_00020886	XLOC_011236	NA	chr15:86041677-86041776	99
TCONS_00020895	gcKO	WT	346.182	0.001	17.4012	5e-05	0.00104398	yes	TCONS_00020895	XLOC_011245	NA	chr15:88071403-88071509	106
TCONS_00020896	gcKO	WT	877.53	0.001	18.7431	1e-04	0.00182757	yes	TCONS_00020896	XLOC_011246	NA	chr15:88213723-88213788	65
TCONS_00020897	gcKO	WT	937.458	0.001	18.8384	5e-05	0.00104398	yes	TCONS_00020897	XLOC_011247	NA	chr15:88434497-88434568	71
TCONS_00020907	gcKO	WT	985.355	0.001	18.9103	5e-05	0.00104398	yes	TCONS_00020907	XLOC_011257	NA	chr15:89146304-89146396	92
TCONS_00020910	gcKO	WT	627.905	0.001	18.2602	5e-05	0.00104398	yes	TCONS_00020910	XLOC_011260	NA	chr15:89597010-89597096	86
TCONS_00020916	gcKO	WT	1796.3	0.001	19.7766	5e-05	0.00104398	yes	TCONS_00020916	XLOC_011266	NA	chr15:90690711-90690764	53
TCONS_00020920	gcKO	WT	463.019	0.001	17.8207	1e-04	0.00182757	yes	TCONS_00020920	XLOC_011270	NA	chr15:91484452-91484532	80
TCONS_00020931	gcKO	WT	1490.99	0.001	19.5078	5e-05	0.00104398	yes	TCONS_00020931	XLOC_011281	NA	chr15:96040878-96040939	61
TCONS_00020932	gcKO	WT	1288.07	0.001	19.2968	5e-05	0.00104398	yes	TCONS_00020932	XLOC_011282	NA	chr15:96062328-96062392	64
TCONS_00020939	gcKO	WT	557.35	0.001	18.0882	5e-05	0.00104398	yes	TCONS_00020939	XLOC_011289	NA	chr15:96389954-96390036	82
TCONS_00020941	gcKO	WT	1329.68	0.001	19.3426	5e-05	0.00104398	yes	TCONS_00020941	XLOC_011291	NA	chr15:96531519-96531605	86
TCONS_00020948	gcKO	WT	1178.69	0.001	19.1688	1e-04	0.00182757	yes	TCONS_00020948	XLOC_011298	NA	chr15:97331948-97332007	59
TCONS_00020954	gcKO	WT	904.524	0.001	18.7868	5e-05	0.00104398	yes	TCONS_00020954	XLOC_011304	NA	chr15:97452954-97453021	67
TCONS_00020955	gcKO	WT	2.13812	0.001	10.0628	0.0012	0.0183009	yes	TCONS_00020955	XLOC_011305	NA	chr15:97488209-97488624	415
TCONS_00020959	gcKO	WT	757.03	0.001	18.53	5e-05	0.00104398	yes	TCONS_00020959	XLOC_011309	NA	chr15:98451737-98451834	97
TCONS_00020967	gcKO	WT	1418.08	0.001	19.4355	5e-05	0.00104398	yes	TCONS_00020967	XLOC_011317	NA	chr15:98904669-98904737	68
TCONS_00020976	gcKO	WT	862.109	0.001	18.7175	5e-05	0.00104398	yes	TCONS_00020976	XLOC_011326	NA	chr15:100904438-100904527	89
TCONS_00020981	gcKO	WT	1730.41	0.001	19.7227	1e-04	0.00182757	yes	TCONS_00020981	XLOC_011331	NA	chr15:101132758-101132810	52
TCONS_00020982	gcKO	WT	284.645	0.001	17.1188	5e-05	0.00104398	yes	TCONS_00020982	XLOC_011332	NA	chr15:101205518-101205632	114
TCONS_00020989	gcKO	WT	5.54798	1.87361	1.56563	5e-05	0.00104398	yes	TCONS_00020989	XLOC_011339	NA	chr15:102359066-102361784	2718
TCONS_00020991	gcKO	WT	857.461	0.001	18.7097	5e-05	0.00104398	yes	TCONS_00020991	XLOC_011341	NA	chr15:102521305-102521387	82
TCONS_00020993	gcKO	WT	720.458	0.001	18.4586	5e-05	0.00104398	yes	TCONS_00020993	XLOC_011343	NA	chr15:102524575-102524666	91
TCONS_00020998	gcKO	WT	725.133	0.001	18.4679	5e-05	0.00104398	yes	TCONS_00020998	XLOC_011348	NA	chr15:103263165-103263259	94
TCONS_00021067	gcKO	WT	0.430835	4.22506	-3.29076	9e-04	0.0142341	yes	TCONS_00021067	XLOC_011374	NA	chr16:7767983-7771700	2164
TCONS_00021155	gcKO	WT	15.5847	9.52065	0.710939	7e-04	0.0113235	yes	TCONS_00021155	XLOC_011410	Abcc1	chr16:14361650-14474971	5935
TCONS_00021241	gcKO	WT	4.71328	9.47841	-1.00776	0.00135	0.0203078	yes	TCONS_00021241	XLOC_011441	NA	chr16:18214005-18216080	1434
TCONS_00021282	gcKO	WT	27.7155	43.265	-0.642489	0.00295	0.039419	yes	TCONS_00021282	XLOC_011456	Eif2b5	chr16:20498889-20509398	2556
TCONS_00021452	gcKO	WT	1073.29	0.001	19.0336	5e-05	0.00104398	yes	TCONS_00021452	XLOC_011524	NA	chr16:32727607-32732107	83
TCONS_00021576	gcKO	WT	8.76954	1.25803	2.80035	0.00015	0.00268331	yes	TCONS_00021576	XLOC_011580	Drd3	chr16:43762354-43822952	1341
TCONS_00021629	gcKO	WT	16.6985	45.8042	-1.45571	5e-05	0.00104398	yes	TCONS_00021629	XLOC_011607	NA	chr16:49955926-49959073	574
TCONS_00021719	gcKO	WT	54.5076	0.001	14.7342	5e-05	0.00104398	yes	TCONS_00021719	XLOC_011648	NA	chr16:76546693-76549046	164
TCONS_00021722	gcKO	WT	19.2957	30.2513	-0.648691	0.00305	0.0406322	yes	TCONS_00021722	XLOC_011649	Usp25	chr16:77013509-77117096	4413
TCONS_00021739	gcKO	WT	8.38493	18.4909	-1.14085	5e-05	0.00104398	yes	TCONS_00021739	XLOC_011657	NA	chr16:78695234-78709333	2260
TCONS_00021791	gcKO	WT	13.4876	6.47712	1.05809	5e-05	0.00104398	yes	TCONS_00021791	XLOC_011689	Il10rb	chr16:91406479-91426079	1850
TCONS_00021829	gcKO	WT	4.2595	9.35175	-1.13437	0.00025	0.00433359	yes	TCONS_00021829	XLOC_011707	Chaf1b	chr16:93884145-93906351	1913
TCONS_00021915	gcKO	WT	40.2281	21.1849	0.925135	0.00035	0.00592226	yes	TCONS_00021915	XLOC_011742	Ubald1	chr16:4874778-4880022	1386
TCONS_00021939	gcKO	WT	27.6586	13.8579	0.996968	5e-05	0.00104398	yes	TCONS_00021939	XLOC_011749	AU021092	chr16:5211911-5222392	1372
TCONS_00021944	gcKO	WT	13.4302	5.80446	1.21011	0.00015	0.00268331	yes	TCONS_00021944	XLOC_011751	Cldn26	chr16:8409341-8425246	1406
TCONS_00021978	gcKO	WT	10.2362	4.51296	1.18136	5e-05	0.00104398	yes	TCONS_00021978	XLOC_011765	Litaf	chr16:10959365-10993214	2237
TCONS_00022124	gcKO	WT	136.987	78.3084	0.806792	0.0017	0.0247116	yes	TCONS_00022124	XLOC_011819	Ranbp1	chr16:18239876-18248847	804
TCONS_00022264	gcKO	WT	26.4987	55.1679	-1.05788	5e-05	0.00104398	yes	TCONS_00022264	XLOC_011893	Ppp1r2	chr16:31251626-31275363	4074
TCONS_00022266	gcKO	WT	358.607	0.001	17.452	5e-05	0.00104398	yes	TCONS_00022266	XLOC_011895	NA	chr16:31344695-31351083	110
TCONS_00022274	gcKO	WT	5.47555	1.75161	1.64376	5e-05	0.00104398	yes	TCONS_00022274	XLOC_011901	Lrrc33	chr16:32142901-32165562	2572
TCONS_00022353	gcKO	WT	4.32366	1.89592	1.18893	5e-05	0.00104398	yes	TCONS_00022353	XLOC_011948	Arhgap31	chr16:38598455-38713148	7722
TCONS_00022439	gcKO	WT	89.0166	149.488	-0.747877	0.0026	0.0353488	yes	TCONS_00022439	XLOC_011981	Ccdc54	chr16:50589745-50654279	1296
TCONS_00022588	gcKO	WT	45.044	70.4204	-0.644647	0.00275	0.037096	yes	TCONS_00022588	XLOC_012064	Mrpl39	chr16:84717824-84735547	1850
TCONS_00022704	gcKO	WT	37.252	72.4975	-0.960595	5e-05	0.00104398	yes	TCONS_00022704	XLOC_012131	4930563D23Rik	chr16:92319007-92321686	2679
TCONS_00022766	gcKO	WT	1.99975	1.08573	0.880547	0.00245	0.0336202	yes	TCONS_00022766	XLOC_012151	Dscam	chr16:96813686-97392342	7480
TCONS_00022789	gcKO	WT	787.131	0.001	18.5862	5e-05	0.00104398	yes	TCONS_00022789	XLOC_012161	NA	chr16:3635306-3635386	80
TCONS_00022791	gcKO	WT	2094.37	0.001	19.9981	5e-05	0.00104398	yes	TCONS_00022791	XLOC_012163	NA	chr16:3662903-3662960	57
TCONS_00022793	gcKO	WT	515.401	0.001	17.9753	5e-05	0.00104398	yes	TCONS_00022793	XLOC_012165	NA	chr16:3763102-3763190	88
TCONS_00022794	gcKO	WT	799.179	0.001	18.6082	5e-05	0.00104398	yes	TCONS_00022794	XLOC_012166	NA	chr16:3781057-3781130	73
TCONS_00022795	gcKO	WT	715.732	0.001	18.4491	5e-05	0.00104398	yes	TCONS_00022795	XLOC_012167	NA	chr16:3827647-3827731	84
TCONS_00022800	gcKO	WT	128.651	0.001	15.9731	5e-05	0.00104398	yes	TCONS_00022800	XLOC_012172	NA	chr16:4034093-4034228	135
TCONS_00022805	gcKO	WT	102.552	0.001	15.646	5e-05	0.00104398	yes	TCONS_00022805	XLOC_012177	NA	chr16:5256537-5256687	150
TCONS_00022806	gcKO	WT	517.099	0.001	17.9801	5e-05	0.00104398	yes	TCONS_00022806	XLOC_012178	NA	chr16:5258290-5258376	86
TCONS_00022809	gcKO	WT	601.924	0.001	18.1992	5e-05	0.00104398	yes	TCONS_00022809	XLOC_012181	NA	chr16:7858475-7858555	80
TCONS_00022811	gcKO	WT	352.101	0.001	17.4256	5e-05	0.00104398	yes	TCONS_00022811	XLOC_012183	NA	chr16:8073873-8073963	90
TCONS_00022812	gcKO	WT	747.981	0.001	18.5126	5e-05	0.00104398	yes	TCONS_00022812	XLOC_012184	NA	chr16:8456970-8457057	87
TCONS_00022821	gcKO	WT	1796.3	0.001	19.7766	5e-05	0.00104398	yes	TCONS_00022821	XLOC_012193	NA	chr16:10325350-10325403	53
TCONS_00022832	gcKO	WT	0.001	6.66205	-11.702	0.0033	0.0430246	yes	TCONS_00022832	XLOC_012204	NA	chr16:12514237-12514492	255
TCONS_00022839	gcKO	WT	529.922	0.001	18.0154	5e-05	0.00104398	yes	TCONS_00022839	XLOC_012211	NA	chr16:14894124-14894221	97
TCONS_00022840	gcKO	WT	1012.32	0.001	18.9492	5e-05	0.00104398	yes	TCONS_00022840	XLOC_012212	NA	chr16:15609105-15609173	68
TCONS_00022841	gcKO	WT	1299.54	0.001	19.3096	5e-05	0.00104398	yes	TCONS_00022841	XLOC_012213	NA	chr16:16680648-16680716	68
TCONS_00022842	gcKO	WT	0.001	12.2821	-12.5844	0.00195	0.0275981	yes	TCONS_00022842	XLOC_012214	NA	chr16:16690872-16691087	215
TCONS_00022843	gcKO	WT	641.424	0.001	18.2909	1e-04	0.00182757	yes	TCONS_00022843	XLOC_012215	NA	chr16:16729138-16729210	72
TCONS_00022848	gcKO	WT	714.217	0.001	18.446	5e-05	0.00104398	yes	TCONS_00022848	XLOC_012220	NA	chr16:17273086-17273198	112
TCONS_00022857	gcKO	WT	0.001	125.755	-15.9403	0.0016	0.0234468	yes	TCONS_00022857	XLOC_012229	NA	chr16:18037124-18037229	105
TCONS_00022858	gcKO	WT	3749.17	0.001	20.8381	5e-05	0.00104398	yes	TCONS_00022858	XLOC_012230	NA	chr16:18172110-18172154	44
TCONS_00022859	gcKO	WT	274.701	0.001	17.0675	5e-05	0.00104398	yes	TCONS_00022859	XLOC_012231	NA	chr16:18207240-18207340	100
TCONS_00022861	gcKO	WT	613.162	0.001	18.2259	5e-05	0.00104398	yes	TCONS_00022861	XLOC_012233	NA	chr16:18611008-18611088	80
TCONS_00022866	gcKO	WT	928.264	0.001	18.8242	5e-05	0.00104398	yes	TCONS_00022866	XLOC_012238	NA	chr16:19386763-19386853	90
TCONS_00022871	gcKO	WT	979.202	0.001	18.9012	5e-05	0.00104398	yes	TCONS_00022871	XLOC_012243	NA	chr16:23387662-23387732	70
TCONS_00022873	gcKO	WT	1196.07	0.001	19.1899	5e-05	0.00104398	yes	TCONS_00022873	XLOC_012245	NA	chr16:23543573-23543637	64
TCONS_00022880	gcKO	WT	509.32	0.001	17.9582	5e-05	0.00104398	yes	TCONS_00022880	XLOC_012252	NA	chr16:29669671-29669751	80
TCONS_00022882	gcKO	WT	1574.26	0.001	19.5862	5e-05	0.00104398	yes	TCONS_00022882	XLOC_012254	NA	chr16:29813757-29813837	80
TCONS_00022890	gcKO	WT	534.542	0.001	18.0279	5e-05	0.00104398	yes	TCONS_00022890	XLOC_012262	NA	chr16:31278309-31278390	81
TCONS_00022898	gcKO	WT	556.681	0.001	18.0865	5e-05	0.00104398	yes	TCONS_00022898	XLOC_012270	NA	chr16:32195020-32195104	84
TCONS_00022912	gcKO	WT	0.001	226.599	-16.7898	0.0033	0.0430246	yes	TCONS_00022912	XLOC_012284	NA	chr16:39119202-39119288	86
TCONS_00022914	gcKO	WT	641.126	0.001	18.2903	5e-05	0.00104398	yes	TCONS_00022914	XLOC_012286	NA	chr16:40693443-40693530	87
TCONS_00022915	gcKO	WT	783.599	0.001	18.5798	5e-05	0.00104398	yes	TCONS_00022915	XLOC_012287	NA	chr16:41260433-41260520	87
TCONS_00022919	gcKO	WT	439.103	0.001	17.7442	5e-05	0.00104398	yes	TCONS_00022919	XLOC_012291	NA	chr16:42958196-42958285	89
TCONS_00022920	gcKO	WT	182.237	0.001	16.4755	5e-05	0.00104398	yes	TCONS_00022920	XLOC_012292	NA	chr16:43125010-43125129	119
TCONS_00022934	gcKO	WT	1473.15	0.001	19.4905	5e-05	0.00104398	yes	TCONS_00022934	XLOC_012306	NA	chr16:44172712-44172783	71
TCONS_00022935	gcKO	WT	310.415	0.001	17.2438	5e-05	0.00104398	yes	TCONS_00022935	XLOC_012307	NA	chr16:44672868-44672969	101
TCONS_00022937	gcKO	WT	751.361	0.001	18.5191	5e-05	0.00104398	yes	TCONS_00022937	XLOC_012309	NA	chr16:45899850-45899928	78
TCONS_00022942	gcKO	WT	2.381	4.81405	-1.01538	0.0038	0.0484616	yes	TCONS_00022942	XLOC_012314	NA	chr16:48072335-48074592	2257
TCONS_00022953	gcKO	WT	0.001	126.938	-15.9538	0.00095	0.0149297	yes	TCONS_00022953	XLOC_012325	NA	chr16:52657488-52657598	110
TCONS_00022954	gcKO	WT	1194.34	0.001	19.1878	5e-05	0.00104398	yes	TCONS_00022954	XLOC_012326	NA	chr16:52786735-52786811	76
TCONS_00022956	gcKO	WT	1120.32	0.001	19.0955	5e-05	0.00104398	yes	TCONS_00022956	XLOC_012328	NA	chr16:52917907-52917997	90
TCONS_00022960	gcKO	WT	1407.64	0.001	19.4248	5e-05	0.00104398	yes	TCONS_00022960	XLOC_012332	NA	chr16:58298059-58298136	77
TCONS_00022961	gcKO	WT	137.461	14.4069	3.2541	2e-04	0.00353476	yes	TCONS_00022961	XLOC_012333	NA	chr16:58347364-58347650	286
TCONS_00022962	gcKO	WT	390.457	0.001	17.5748	5e-05	0.00104398	yes	TCONS_00022962	XLOC_012334	NA	chr16:58556203-58556297	94
TCONS_00022963	gcKO	WT	799.902	0.001	18.6095	1e-04	0.00182757	yes	TCONS_00022963	XLOC_012335	NA	chr16:58737749-58737816	67
TCONS_00022965	gcKO	WT	305.757	0.001	17.222	5e-05	0.00104398	yes	TCONS_00022965	XLOC_012337	NA	chr16:59570964-59571079	115
TCONS_00022977	gcKO	WT	766.319	0.001	18.5476	5e-05	0.00104398	yes	TCONS_00022977	XLOC_012349	NA	chr16:65876666-65876751	85
TCONS_00022978	gcKO	WT	151.655	0.001	16.2104	5e-05	0.00104398	yes	TCONS_00022978	XLOC_012350	NA	chr16:69814228-69814359	131
TCONS_00022980	gcKO	WT	1376.38	0.001	19.3924	5e-05	0.00104398	yes	TCONS_00022980	XLOC_012352	NA	chr16:69903629-69903690	61
TCONS_00022983	gcKO	WT	12.3291	1.42501	3.11213	0.00115	0.0176741	yes	TCONS_00022983	XLOC_012355	NA	chr16:69906992-69907772	780
TCONS_00022984	gcKO	WT	1256.31	0.001	19.2608	5e-05	0.00104398	yes	TCONS_00022984	XLOC_012356	NA	chr16:70257451-70257517	66
TCONS_00022993	gcKO	WT	769.374	0.001	18.5533	5e-05	0.00104398	yes	TCONS_00022993	XLOC_012365	NA	chr16:78227888-78227958	70
TCONS_00022994	gcKO	WT	1564.05	0.001	19.5769	5e-05	0.00104398	yes	TCONS_00022994	XLOC_012366	NA	chr16:78238718-78238795	77
TCONS_00022995	gcKO	WT	201.8	0.001	16.6226	1e-04	0.00182757	yes	TCONS_00022995	XLOC_012367	NA	chr16:78286944-78287048	104
TCONS_00023000	gcKO	WT	375.091	0.001	17.5169	5e-05	0.00104398	yes	TCONS_00023000	XLOC_012372	NA	chr16:80051275-80051368	93
TCONS_00023005	gcKO	WT	801.452	0.001	18.6123	5e-05	0.00104398	yes	TCONS_00023005	XLOC_012377	NA	chr16:81874070-81874148	78
TCONS_00023010	gcKO	WT	331.357	0.001	17.338	5e-05	0.00104398	yes	TCONS_00023010	XLOC_012382	NA	chr16:85901761-85901868	107
TCONS_00023016	gcKO	WT	1987.54	0.001	19.9226	5e-05	0.00104398	yes	TCONS_00023016	XLOC_012388	NA	chr16:86894995-86895063	68
TCONS_00023018	gcKO	WT	573.486	0.001	18.1294	5e-05	0.00104398	yes	TCONS_00023018	XLOC_012390	NA	chr16:87123879-87123956	77
TCONS_00023036	gcKO	WT	805.526	0.001	18.6196	5e-05	0.00104398	yes	TCONS_00023036	XLOC_012408	NA	chr16:89658047-89658122	75
TCONS_00023042	gcKO	WT	139.099	0.001	16.0858	5e-05	0.00104398	yes	TCONS_00023042	XLOC_012414	NA	chr16:90363615-90363762	147
TCONS_00023055	gcKO	WT	1001.81	0.001	18.9342	5e-05	0.00104398	yes	TCONS_00023055	XLOC_012427	NA	chr16:91286109-91286187	78
TCONS_00023059	gcKO	WT	1658.42	284.579	2.5429	0.0014	0.0209805	yes	TCONS_00023059	XLOC_012431	NA	chr16:91534834-91534946	112
TCONS_00023064	gcKO	WT	1158.38	0.001	19.1437	5e-05	0.00104398	yes	TCONS_00023064	XLOC_012436	NA	chr16:92057928-92057991	63
TCONS_00023065	gcKO	WT	1360.16	0.001	19.3753	0.00235	0.032416	yes	TCONS_00023065	XLOC_012437	NA	chr16:92115618-92115666	48
TCONS_00023066	gcKO	WT	151.453	0.001	16.2085	5e-05	0.00104398	yes	TCONS_00023066	XLOC_012438	NA	chr16:93464291-93464429	138
TCONS_00023071	gcKO	WT	397.897	0.001	17.602	5e-05	0.00104398	yes	TCONS_00023071	XLOC_012443	NA	chr16:94066285-94066374	89
TCONS_00023072	gcKO	WT	151.968	0.001	16.2134	5e-05	0.00104398	yes	TCONS_00023072	XLOC_012444	NA	chr16:94791227-94791347	120
TCONS_00023073	gcKO	WT	959.882	0.001	18.8725	5e-05	0.00104398	yes	TCONS_00023073	XLOC_012445	NA	chr16:95366956-95367023	67
TCONS_00023075	gcKO	WT	1292.74	0.001	19.302	5e-05	0.00104398	yes	TCONS_00023075	XLOC_012447	NA	chr16:95575583-95575669	86
TCONS_00023077	gcKO	WT	648.226	0.001	18.3061	5e-05	0.00104398	yes	TCONS_00023077	XLOC_012449	NA	chr16:96306399-96306479	80
TCONS_00023079	gcKO	WT	804.095	0.001	18.617	5e-05	0.00104398	yes	TCONS_00023079	XLOC_012451	NA	chr16:96311495-96311564	69
TCONS_00023080	gcKO	WT	753.022	0.001	18.5223	5e-05	0.00104398	yes	TCONS_00023080	XLOC_012452	NA	chr16:97911207-97911301	94
TCONS_00023194	gcKO	WT	14.6173	6.26369	1.22246	5e-05	0.00104398	yes	TCONS_00023194	XLOC_012494	Agpat4	chr17:12312149-12412506	1910
TCONS_00023299	gcKO	WT	24.0138	14.2283	0.755059	6e-04	0.00979359	yes	TCONS_00023299	XLOC_012553	Ppp2r1a	chr17:21082417-21102869	2256
TCONS_00023371	gcKO	WT	13.1417	5.412	1.27976	4e-04	0.00672247	yes	TCONS_00023371	XLOC_012596	Eci1	chr17:24563627-24576261	1091
TCONS_00023397	gcKO	WT	15.7422	5.47371	1.52387	0.0024	0.0329911	yes	TCONS_00023397	XLOC_012607	Msrb1	chr17:24873586-24879725	886
TCONS_00023421	gcKO	WT	7.43766	4.08695	0.863665	0.00325	0.042908	yes	TCONS_00023421	XLOC_012617	Clcn7	chr17:25270309-25299284	4063
TCONS_00023442	gcKO	WT	4.71608	0.001	11.2037	5e-05	0.00104398	yes	TCONS_00023442	XLOC_012629	NA	chr17:25590715-25605313	502
TCONS_00023490	gcKO	WT	62.4615	32.3764	0.948003	5e-05	0.00104398	yes	TCONS_00023490	XLOC_012651	Atp6v0e	chr17:26813340-26836591	796
TCONS_00023519	gcKO	WT	20.8259	10.076	1.04738	5e-05	0.00104398	yes	TCONS_00023519	XLOC_012661	NA	chr17:27497554-27504526	6629
TCONS_00023687	gcKO	WT	202.656	318.575	-0.652598	0.00295	0.039419	yes	TCONS_00023687	XLOC_012727	Ndufa7	chr17:33961558-33975258	482
TCONS_00023770	gcKO	WT	15.2225	7.58949	1.00404	0.00025	0.00433359	yes	TCONS_00023770	XLOC_012759	Atf6b	chr17:34783742-34792019	2566
TCONS_00023971	gcKO	WT	150.219	282.747	-0.91244	4e-04	0.00672247	yes	TCONS_00023971	XLOC_012878	Nfkbie	chr17:45692664-45700117	2421
TCONS_00023972	gcKO	WT	14.6688	5.57744	1.39492	5e-05	0.00104398	yes	TCONS_00023972	XLOC_012879	Slc35b2	chr17:45700988-45704618	1739
TCONS_00024014	gcKO	WT	25.2701	38.7487	-0.616697	0.0039	0.0494037	yes	TCONS_00024014	XLOC_012898	Tbcc	chr17:47027569-47029412	1843
TCONS_00024040	gcKO	WT	4.31172	0.888215	2.27799	0.00045	0.00749931	yes	TCONS_00024040	XLOC_012910	Tfeb	chr17:47873985-47929365	2332
TCONS_00024073	gcKO	WT	5.92026	11.8225	-0.997681	0.003	0.0400602	yes	TCONS_00024073	XLOC_012925	NA	chr17:50376133-50386538	9070
TCONS_00024258	gcKO	WT	59.8171	21.1848	1.49748	5e-05	0.00104398	yes	TCONS_00024258	XLOC_012994	Wdr43	chr17:71965554-72008371	1590
TCONS_00024281	gcKO	WT	4.11953	1.06252	1.95398	5e-05	0.00104398	yes	TCONS_00024281	XLOC_013000	Lbh	chr17:73267644-73291286	3068
TCONS_00024349	gcKO	WT	115.131	216.019	-0.907876	0.00085	0.0135078	yes	TCONS_00024349	XLOC_013024	Morn2	chr17:80623785-80696818	647
TCONS_00024361	gcKO	WT	27.4648	12.2671	1.16272	5e-05	0.00104398	yes	TCONS_00024361	XLOC_013029	Pkdcc	chr17:83614622-83624409	2454
TCONS_00024417	gcKO	WT	38.693	60.5907	-0.64701	0.0028	0.0376809	yes	TCONS_00024417	XLOC_013044	Cript	chr17:87424900-87435148	1171
TCONS_00024460	gcKO	WT	44.8873	27.4281	0.710632	0.0012	0.0183009	yes	TCONS_00024460	XLOC_013067	4930470H14Rik	chr17:4044657-4082995	1734
TCONS_00024473	gcKO	WT	6.97663	3.70484	0.912937	4e-04	0.00672247	yes	TCONS_00024473	XLOC_013074	Tmem181b-ps	chr17:6438149-6451089	4710
TCONS_00024483	gcKO	WT	7.98348	4.71272	0.760332	0.0023	0.0318702	yes	TCONS_00024483	XLOC_013080	Ezr	chr17:6942479-6987129	3070
TCONS_00024519	gcKO	WT	132.421	212.374	-0.681471	0.00385	0.0489108	yes	TCONS_00024519	XLOC_013099	Pacrg	chr17:10595877-12256279	1355
TCONS_00024661	gcKO	WT	7.7332	3.30748	1.22508	0.00015	0.00268331	yes	TCONS_00024661	XLOC_013181	Kremen2	chr17:23878165-23882796	2117
TCONS_00024866	gcKO	WT	390.976	625.494	-0.677915	0.0018	0.0259656	yes	TCONS_00024866	XLOC_013257	Mnf1	chr17:27259609-27270836	473
TCONS_00024871	gcKO	WT	5.11196	2.60025	0.974954	0.0014	0.0209805	yes	TCONS_00024871	XLOC_013261	Grm4	chr17:27559332-27640249	2975
TCONS_00024897	gcKO	WT	14.8781	8.38847	0.826636	0.0022	0.0306664	yes	TCONS_00024897	XLOC_013271	Fkbp5	chr17:28535863-28654466	3505
TCONS_00024903	gcKO	WT	94.1738	161.474	-0.777898	0.0036	0.0461779	yes	TCONS_00024903	XLOC_013274	Srpk1	chr17:28726365-28759399	2454
TCONS_00024918	gcKO	WT	15.68	6.85111	1.1944	1e-04	0.00182757	yes	TCONS_00024918	XLOC_013283	Mtch1	chr17:29469018-29484849	1869
TCONS_00024930	gcKO	WT	8.65654	2.95554	1.55005	0.00015	0.00268331	yes	TCONS_00024930	XLOC_013288	NA	chr17:30134829-30141685	1416
TCONS_00025011	gcKO	WT	4.38115	1.3351	1.71361	0.00325	0.042908	yes	TCONS_00025011	XLOC_013318	Cyp4f13	chr17:33061632-33084306	1711
TCONS_00025113	gcKO	WT	233.817	424.12	-0.85909	1e-04	0.00182757	yes	TCONS_00025113	XLOC_013371	Aif1	chr17:35307936-35312946	875
TCONS_00025134	gcKO	WT	31.9724	20.0478	0.673356	0.00145	0.0216237	yes	TCONS_00025134	XLOC_013382	Tubb5	chr17:35970864-35975246	2645
TCONS_00025192	gcKO	WT	182.3	295.151	-0.695136	0.00125	0.0189833	yes	TCONS_00025192	XLOC_013408	Ppp1r11	chr17:37085299-37088737	1679
TCONS_00025230	gcKO	WT	358.963	607.152	-0.758221	0.0016	0.0234468	yes	TCONS_00025230	XLOC_013441	Pgk2	chr17:40343945-40345620	1592
TCONS_00025238	gcKO	WT	123.493	250.363	-1.01959	2e-04	0.00353476	yes	TCONS_00025238	XLOC_013446	Glyatl3	chr17:41041689-41051299	873
TCONS_00025310	gcKO	WT	17.2913	2.38745	2.85598	1e-04	0.00182757	yes	TCONS_00025310	XLOC_013466	Gm7325	chr17:45737915-45739051	811
TCONS_00025506	gcKO	WT	49.9048	84.3393	-0.757015	9e-04	0.0142341	yes	TCONS_00025506	XLOC_013551	Acsbg2	chr17:56982522-57013870	2608
TCONS_00025521	gcKO	WT	4.85522	2.37344	1.03225	0.00035	0.00592226	yes	TCONS_00025521	XLOC_013558	Slc25a23	chr17:57183133-57199286	3362
TCONS_00025560	gcKO	WT	5.33364	3.16203	0.754084	0.00245	0.0336202	yes	TCONS_00025560	XLOC_013580	Twsg1	chr17:66272404-66300527	4047
TCONS_00025566	gcKO	WT	71.1542	113.505	-0.673727	0.00175	0.0253456	yes	TCONS_00025566	XLOC_013582	Ndufv2	chr17:66428134-66450831	1472
TCONS_00025569	gcKO	WT	4.70827	1.72113	1.45131	0.00085	0.0135078	yes	TCONS_00025569	XLOC_013583	Soga2	chr17:66686321-66799090	7221
TCONS_00025603	gcKO	WT	0.668444	1.67347	-1.32267	0.0031	0.041243	yes	TCONS_00025603	XLOC_013602	BC027072	chr17:72092894-72102225	5006
TCONS_00025617	gcKO	WT	54.4137	100.896	-0.890815	8e-04	0.012821	yes	TCONS_00025617	XLOC_013610	Dpy30	chr17:74698813-74723284	799
TCONS_00025708	gcKO	WT	2.05919	0.48768	2.07582	0.0021	0.0294586	yes	TCONS_00025708	XLOC_013644	Kcng3	chr17:83985296-84031235	3356
TCONS_00025743	gcKO	WT	71.2352	139.64	-0.97104	5e-05	0.00104398	yes	TCONS_00025743	XLOC_013657	Atp6v1e2	chr17:87343448-87347227	1005
TCONS_00025757	gcKO	WT	1737.26	0.001	19.7284	5e-05	0.00104398	yes	TCONS_00025757	XLOC_013664	NA	chr17:87864248-87873071	81
TCONS_00025778	gcKO	WT	1538.75	0.001	19.5533	5e-05	0.00104398	yes	TCONS_00025778	XLOC_013676	NA	chr17:3058961-3059031	70
TCONS_00025782	gcKO	WT	1039.87	0.001	18.988	5e-05	0.00104398	yes	TCONS_00025782	XLOC_013680	NA	chr17:3610317-3610384	67
TCONS_00025787	gcKO	WT	833.851	0.001	18.6694	5e-05	0.00104398	yes	TCONS_00025787	XLOC_013685	NA	chr17:5372023-5372095	72
TCONS_00025788	gcKO	WT	1024.54	0.001	18.9665	5e-05	0.00104398	yes	TCONS_00025788	XLOC_013686	NA	chr17:5395810-5395891	81
TCONS_00025789	gcKO	WT	0.001	1014.23	-18.952	5e-05	0.00104398	yes	TCONS_00025789	XLOC_013687	NA	chr17:5441481-5441551	70
TCONS_00025794	gcKO	WT	387.084	0.001	17.5623	5e-05	0.00104398	yes	TCONS_00025794	XLOC_013692	NA	chr17:6457288-6457398	110
TCONS_00025795	gcKO	WT	743.049	0.001	18.5031	5e-05	0.00104398	yes	TCONS_00025795	XLOC_013693	NA	chr17:6470914-6470997	83
TCONS_00025796	gcKO	WT	625.621	0.001	18.2549	5e-05	0.00104398	yes	TCONS_00025796	XLOC_013694	NA	chr17:6474571-6474648	77
TCONS_00025801	gcKO	WT	839.317	0.001	18.6789	5e-05	0.00104398	yes	TCONS_00025801	XLOC_013699	NA	chr17:8059714-8059784	70
TCONS_00025805	gcKO	WT	926.071	0.001	18.8208	5e-05	0.00104398	yes	TCONS_00025805	XLOC_013703	NA	chr17:8309345-8309432	87
TCONS_00025806	gcKO	WT	721.561	0.001	18.4608	5e-05	0.00104398	yes	TCONS_00025806	XLOC_013704	NA	chr17:8345563-8345651	88
TCONS_00025808	gcKO	WT	480.588	0.001	17.8744	5e-05	0.00104398	yes	TCONS_00025808	XLOC_013706	NA	chr17:8460406-8460538	132
TCONS_00025810	gcKO	WT	2480.44	0.001	20.2422	5e-05	0.00104398	yes	TCONS_00025810	XLOC_013708	NA	chr17:8627141-8627196	55
TCONS_00025812	gcKO	WT	1265.46	0.001	19.2712	5e-05	0.00104398	yes	TCONS_00025812	XLOC_013710	NA	chr17:9252382-9252444	62
TCONS_00025813	gcKO	WT	377.961	0.001	17.5279	5e-05	0.00104398	yes	TCONS_00025813	XLOC_013711	NA	chr17:9299803-9299891	88
TCONS_00025814	gcKO	WT	116.724	0.001	15.8328	5e-05	0.00104398	yes	TCONS_00025814	XLOC_013712	NA	chr17:9303803-9303942	139
TCONS_00025820	gcKO	WT	524.678	0.001	18.0011	5e-05	0.00104398	yes	TCONS_00025820	XLOC_013718	NA	chr17:12415711-12415815	104
TCONS_00025823	gcKO	WT	0.001	5.55626	-11.4402	0.00135	0.0203078	yes	TCONS_00025823	XLOC_013721	NA	chr17:13820040-13820323	283
TCONS_00025825	gcKO	WT	890.903	0.001	18.7649	5e-05	0.00104398	yes	TCONS_00025825	XLOC_013723	NA	chr17:14128414-14128495	81
TCONS_00025832	gcKO	WT	0.001	1800.38	-19.7799	5e-05	0.00104398	yes	TCONS_00025832	XLOC_013730	NA	chr17:14931065-14931123	58
TCONS_00025839	gcKO	WT	294.414	0.001	17.1675	5e-05	0.00104398	yes	TCONS_00025839	XLOC_013737	NA	chr17:15700995-15701113	118
TCONS_00025842	gcKO	WT	1299.54	0.001	19.3096	5e-05	0.00104398	yes	TCONS_00025842	XLOC_013740	NA	chr17:17200845-17200913	68
TCONS_00025852	gcKO	WT	538.291	0.001	18.038	0.00355	0.0456397	yes	TCONS_00025852	XLOC_013750	NA	chr17:18053476-18053540	64
TCONS_00025853	gcKO	WT	116.75	0.001	15.8331	0.0039	0.0494037	yes	TCONS_00025853	XLOC_013751	NA	chr17:19626798-19626902	104
TCONS_00025855	gcKO	WT	0.001	1617.83	-19.6256	0.00015	0.00268331	yes	TCONS_00025855	XLOC_013753	NA	chr17:21183374-21183430	56
TCONS_00025859	gcKO	WT	848.356	0.001	18.6943	5e-05	0.00104398	yes	TCONS_00025859	XLOC_013757	NA	chr17:22170870-22170945	75
TCONS_00025862	gcKO	WT	986.079	0.001	18.9113	5e-05	0.00104398	yes	TCONS_00025862	XLOC_013760	NA	chr17:22207024-22207106	82
TCONS_00025865	gcKO	WT	251.731	0.001	16.9415	0.00015	0.00268331	yes	TCONS_00025865	XLOC_013763	NA	chr17:23480574-23480672	98
TCONS_00025871	gcKO	WT	656.993	0.001	18.3255	0.00025	0.00433359	yes	TCONS_00025871	XLOC_013769	NA	chr17:24388716-24388788	72
TCONS_00025874	gcKO	WT	270.867	0.001	17.0472	5e-05	0.00104398	yes	TCONS_00025874	XLOC_013772	NA	chr17:24940809-24940941	132
TCONS_00025877	gcKO	WT	442.864	0.001	17.7565	1e-04	0.00182757	yes	TCONS_00025877	XLOC_013775	NA	chr17:25319887-25319970	83
TCONS_00025880	gcKO	WT	1071.38	0.001	19.031	5e-05	0.00104398	yes	TCONS_00025880	XLOC_013778	NA	chr17:25616311-25616382	71
TCONS_00025889	gcKO	WT	296.707	0.001	17.1787	5e-05	0.00104398	yes	TCONS_00025889	XLOC_013787	NA	chr17:26639781-26639880	99
TCONS_00025892	gcKO	WT	481.485	0.001	17.8771	1e-04	0.00182757	yes	TCONS_00025892	XLOC_013790	NA	chr17:27018804-27018883	79
TCONS_00025895	gcKO	WT	737.053	0.001	18.4914	5e-05	0.00104398	yes	TCONS_00025895	XLOC_013793	NA	chr17:27080412-27080491	79
TCONS_00025902	gcKO	WT	643.096	0.001	18.2947	5e-05	0.00104398	yes	TCONS_00025902	XLOC_013800	NA	chr17:27270989-27271071	82
TCONS_00025906	gcKO	WT	825.61	0.001	18.6551	5e-05	0.00104398	yes	TCONS_00025906	XLOC_013804	NA	chr17:27512039-27512122	83
TCONS_00025907	gcKO	WT	913.791	0.001	18.8015	5e-05	0.00104398	yes	TCONS_00025907	XLOC_013805	NA	chr17:27515638-27515716	78
TCONS_00025911	gcKO	WT	388.541	0.001	17.5677	5e-05	0.00104398	yes	TCONS_00025911	XLOC_013809	NA	chr17:27680246-27680334	88
TCONS_00025913	gcKO	WT	1472.08	0.001	19.4894	5e-05	0.00104398	yes	TCONS_00025913	XLOC_013811	NA	chr17:27685185-27685249	64
TCONS_00025922	gcKO	WT	1172.56	0.001	19.1612	5e-05	0.00104398	yes	TCONS_00025922	XLOC_013820	NA	chr17:27876748-27876814	66
TCONS_00025928	gcKO	WT	0.001	377.808	-17.5273	0.00095	0.0149297	yes	TCONS_00025928	XLOC_013826	NA	chr17:28664510-28664588	78
TCONS_00025933	gcKO	WT	1179	0.001	19.1691	5e-05	0.00104398	yes	TCONS_00025933	XLOC_013831	NA	chr17:29569309-29569383	74
TCONS_00025934	gcKO	WT	833.923	0.001	18.6696	5e-05	0.00104398	yes	TCONS_00025934	XLOC_013832	NA	chr17:29576056-29576166	110
TCONS_00025937	gcKO	WT	1049.14	0.001	19.0008	5e-05	0.00104398	yes	TCONS_00025937	XLOC_013835	NA	chr17:30053452-30053522	70
TCONS_00025941	gcKO	WT	1472.08	0.001	19.4894	5e-05	0.00104398	yes	TCONS_00025941	XLOC_013839	NA	chr17:31018287-31018351	64
TCONS_00025942	gcKO	WT	0.001	161.188	-16.2984	5e-05	0.00104398	yes	TCONS_00025942	XLOC_013840	NA	chr17:31019940-31020049	109
TCONS_00025943	gcKO	WT	2028.35	0.001	19.9519	5e-05	0.00104398	yes	TCONS_00025943	XLOC_013841	NA	chr17:31419778-31419848	70
TCONS_00025944	gcKO	WT	12.8405	20.27	-0.658604	0.00365	0.0467589	yes	TCONS_00025944	XLOC_013842	NA	chr17:31699726-31701493	1767
TCONS_00025945	gcKO	WT	6.70675	0.001	11.7116	5e-05	0.00104398	yes	TCONS_00025945	XLOC_013843	NA	chr17:31813968-31814679	711
TCONS_00025946	gcKO	WT	1.90786	0.001	9.8985	9e-04	0.0142341	yes	TCONS_00025946	XLOC_013844	NA	chr17:31820838-31821303	465
TCONS_00025947	gcKO	WT	484.806	0.001	17.8871	5e-05	0.00104398	yes	TCONS_00025947	XLOC_013845	NA	chr17:31830314-31830396	82
TCONS_00025950	gcKO	WT	1200.44	0.001	19.1951	5e-05	0.00104398	yes	TCONS_00025950	XLOC_013848	NA	chr17:31941350-31941432	82
TCONS_00025951	gcKO	WT	362.567	0.001	17.4679	5e-05	0.00104398	yes	TCONS_00025951	XLOC_013849	NA	chr17:31972169-31972263	94
TCONS_00025952	gcKO	WT	357.247	0.001	17.4466	5e-05	0.00104398	yes	TCONS_00025952	XLOC_013850	NA	chr17:32250848-32250956	108
TCONS_00025957	gcKO	WT	1958.13	0.001	19.901	5e-05	0.00104398	yes	TCONS_00025957	XLOC_013855	NA	chr17:33573228-33573299	71
TCONS_00025958	gcKO	WT	282.519	0.001	17.108	5e-05	0.00104398	yes	TCONS_00025958	XLOC_013856	NA	chr17:33573395-33573499	104
TCONS_00025964	gcKO	WT	1345.89	0.001	19.3601	5e-05	0.00104398	yes	TCONS_00025964	XLOC_013862	NA	chr17:35135516-35135586	70
TCONS_00025967	gcKO	WT	569.89	0.001	18.1203	5e-05	0.00104398	yes	TCONS_00025967	XLOC_013865	NA	chr17:35530475-35530562	87
TCONS_00025970	gcKO	WT	1237.95	0.001	19.2395	5e-05	0.00104398	yes	TCONS_00025970	XLOC_013868	NA	chr17:36413383-36413457	74
TCONS_00025975	gcKO	WT	0.001	61.1945	-14.9011	0.0033	0.0430246	yes	TCONS_00025975	XLOC_013873	NA	chr17:37385369-37385498	129
TCONS_00025976	gcKO	WT	922.129	0.001	18.8146	5e-05	0.00104398	yes	TCONS_00025976	XLOC_013874	NA	chr17:38090080-38090153	73
TCONS_00025983	gcKO	WT	1604.99	0.001	19.6141	5e-05	0.00104398	yes	TCONS_00025983	XLOC_013881	NA	chr17:39257838-39257893	55
TCONS_00025984	gcKO	WT	239.701	0.001	16.8709	5e-05	0.00104398	yes	TCONS_00025984	XLOC_013882	NA	chr17:40341046-40341160	114
TCONS_00025986	gcKO	WT	641.464	0.001	18.291	5e-05	0.00104398	yes	TCONS_00025986	XLOC_013884	NA	chr17:41683674-41683768	94
TCONS_00025988	gcKO	WT	0.001	330.881	-17.336	5e-05	0.00104398	yes	TCONS_00025988	XLOC_013886	NA	chr17:43693431-43693526	95
TCONS_00025998	gcKO	WT	251.44	0.001	16.9399	5e-05	0.00104398	yes	TCONS_00025998	XLOC_013896	NA	chr17:45710994-45711107	113
TCONS_00026001	gcKO	WT	649.119	0.001	18.3081	5e-05	0.00104398	yes	TCONS_00026001	XLOC_013899	NA	chr17:46170385-46170476	91
TCONS_00026004	gcKO	WT	920.052	0.001	18.8114	1e-04	0.00182757	yes	TCONS_00026004	XLOC_013902	NA	chr17:46632289-46632353	64
TCONS_00026010	gcKO	WT	346.238	0.001	17.4014	5e-05	0.00104398	yes	TCONS_00026010	XLOC_013908	NA	chr17:47018398-47018491	93
TCONS_00026012	gcKO	WT	447.889	0.001	17.7728	5e-05	0.00104398	yes	TCONS_00026012	XLOC_013910	NA	chr17:48083245-48083337	92
TCONS_00026014	gcKO	WT	667.662	0.001	18.3488	0.00035	0.00592226	yes	TCONS_00026014	XLOC_013912	NA	chr17:48166310-48166380	70
TCONS_00026016	gcKO	WT	677.756	0.001	18.3704	5e-05	0.00104398	yes	TCONS_00026016	XLOC_013914	NA	chr17:48619598-48619675	77
TCONS_00026017	gcKO	WT	580.005	0.001	18.1457	5e-05	0.00104398	yes	TCONS_00026017	XLOC_013915	NA	chr17:48643201-48643303	102
TCONS_00026020	gcKO	WT	3.42269	0.001	10.7413	5e-05	0.00104398	yes	TCONS_00026020	XLOC_013918	NA	chr17:48741027-48741456	429
TCONS_00026021	gcKO	WT	2331.16	0.001	20.1526	5e-05	0.00104398	yes	TCONS_00026021	XLOC_013919	NA	chr17:48786166-48786228	62
TCONS_00026023	gcKO	WT	556.388	0.001	18.0857	5e-05	0.00104398	yes	TCONS_00026023	XLOC_013921	NA	chr17:48848133-48848224	91
TCONS_00026025	gcKO	WT	785.333	0.001	18.5829	5e-05	0.00104398	yes	TCONS_00026025	XLOC_013923	NA	chr17:48968550-48968621	71
TCONS_00026028	gcKO	WT	1519.46	0.001	19.5351	5e-05	0.00104398	yes	TCONS_00026028	XLOC_013926	NA	chr17:49412632-49412688	56
TCONS_00026032	gcKO	WT	0.001	3377.77	-20.6876	0.00015	0.00268331	yes	TCONS_00026032	XLOC_013930	NA	chr17:51320842-51320886	44
TCONS_00026046	gcKO	WT	1279.84	0.001	19.2875	5e-05	0.00104398	yes	TCONS_00026046	XLOC_013944	NA	chr17:55700647-55700714	67
TCONS_00026047	gcKO	WT	437.392	0.001	17.7386	5e-05	0.00104398	yes	TCONS_00026047	XLOC_013945	NA	chr17:55789197-55789281	84
TCONS_00026048	gcKO	WT	252.344	0.001	16.945	1e-04	0.00182757	yes	TCONS_00026048	XLOC_013946	NA	chr17:56091695-56091792	97
TCONS_00026049	gcKO	WT	35595.7	9078.19	1.97123	8e-04	0.012821	yes	TCONS_00026049	XLOC_013947	NA	chr17:56145286-56145330	44
TCONS_00026050	gcKO	WT	1633	0.001	19.6391	1e-04	0.00182757	yes	TCONS_00026050	XLOC_013948	NA	chr17:56416296-56416349	53
TCONS_00026055	gcKO	WT	1012.06	0.001	18.9489	5e-05	0.00104398	yes	TCONS_00026055	XLOC_013953	NA	chr17:56750796-56750860	64
TCONS_00026059	gcKO	WT	0.001	44.1966	-14.4317	0.00195	0.0275981	yes	TCONS_00026059	XLOC_013957	NA	chr17:61157548-61157694	146
TCONS_00026060	gcKO	WT	0.001	48.9406	-14.5788	5e-05	0.00104398	yes	TCONS_00026060	XLOC_013958	NA	chr17:63885026-63885198	172
TCONS_00026068	gcKO	WT	846.358	0.001	18.6909	5e-05	0.00104398	yes	TCONS_00026068	XLOC_013966	NA	chr17:64557146-64557227	81
TCONS_00026070	gcKO	WT	1643.06	0.001	19.648	5e-05	0.00104398	yes	TCONS_00026070	XLOC_013968	NA	chr17:64562131-64562203	72
TCONS_00026076	gcKO	WT	1579.55	0.001	19.5911	5e-05	0.00104398	yes	TCONS_00026076	XLOC_013974	NA	chr17:65965510-65965575	65
TCONS_00026091	gcKO	WT	1310.82	0.001	19.322	5e-05	0.00104398	yes	TCONS_00026091	XLOC_013989	NA	chr17:67762303-67762397	94
TCONS_00026092	gcKO	WT	877.194	0.001	18.7425	5e-05	0.00104398	yes	TCONS_00026092	XLOC_013990	NA	chr17:67901562-67901631	69
TCONS_00026097	gcKO	WT	1296.9	0.001	19.3066	5e-05	0.00104398	yes	TCONS_00026097	XLOC_013995	NA	chr17:70110321-70110395	74
TCONS_00026098	gcKO	WT	184.088	0.001	16.49	1e-04	0.00182757	yes	TCONS_00026098	XLOC_013996	NA	chr17:73203408-73203515	107
TCONS_00026106	gcKO	WT	1916.99	0.001	19.8704	5e-05	0.00104398	yes	TCONS_00026106	XLOC_014004	NA	chr17:74587501-74587562	61
TCONS_00026109	gcKO	WT	293.053	0.001	17.1608	5e-05	0.00104398	yes	TCONS_00026109	XLOC_014007	NA	chr17:76726977-76727075	98
TCONS_00026117	gcKO	WT	1308.98	0.001	19.32	1e-04	0.00182757	yes	TCONS_00026117	XLOC_014015	NA	chr17:79049306-79049363	57
TCONS_00026122	gcKO	WT	1104.06	0.001	19.0744	5e-05	0.00104398	yes	TCONS_00026122	XLOC_014020	NA	chr17:80097314-80097378	64
TCONS_00026124	gcKO	WT	0.001	118.405	-15.8534	5e-04	0.00825634	yes	TCONS_00026124	XLOC_014022	NA	chr17:80472967-80473083	116
TCONS_00026131	gcKO	WT	516.918	0.001	17.9796	5e-05	0.00104398	yes	TCONS_00026131	XLOC_014029	NA	chr17:83332363-83332447	84
TCONS_00026133	gcKO	WT	782.026	0.001	18.5769	5e-05	0.00104398	yes	TCONS_00026133	XLOC_014031	NA	chr17:83419005-83419082	77
TCONS_00026134	gcKO	WT	1535.09	0.001	19.5499	5e-05	0.00104398	yes	TCONS_00026134	XLOC_014032	NA	chr17:83613675-83613744	69
TCONS_00026135	gcKO	WT	266.642	0.001	17.0245	0.00025	0.00433359	yes	TCONS_00026135	XLOC_014033	NA	chr17:83922537-83922629	92
TCONS_00026142	gcKO	WT	0.001	51.3415	-14.6479	0.0033	0.0430246	yes	TCONS_00026142	XLOC_014040	NA	chr17:84105121-84105257	136
TCONS_00026145	gcKO	WT	0.001	31.097	-13.9245	0.0033	0.0430246	yes	TCONS_00026145	XLOC_014043	NA	chr17:84358952-84359110	158
TCONS_00026147	gcKO	WT	760.033	0.001	18.5357	5e-05	0.00104398	yes	TCONS_00026147	XLOC_014045	NA	chr17:85425785-85425861	76
TCONS_00026156	gcKO	WT	2515.78	0.001	20.2626	1e-04	0.00182757	yes	TCONS_00026156	XLOC_014054	NA	chr17:88465958-88466004	46
TCONS_00026160	gcKO	WT	689.687	0.001	18.3956	5e-05	0.00104398	yes	TCONS_00026160	XLOC_014058	NA	chr17:89053792-89053877	85
TCONS_00026163	gcKO	WT	6453.6	0.001	21.6217	0.00355	0.0456397	yes	TCONS_00026163	XLOC_014061	NA	chr17:89753311-89753340	29
TCONS_00026165	gcKO	WT	833.851	0.001	18.6694	5e-05	0.00104398	yes	TCONS_00026165	XLOC_014063	NA	chr17:92267750-92267822	72
TCONS_00026193	gcKO	WT	5.30691	2.76624	0.939696	0.00065	0.0105706	yes	TCONS_00026193	XLOC_014083	Colec12	chr18:9707645-9877993	3322
TCONS_00026381	gcKO	WT	3017.24	1285.28	1.23115	5e-05	0.00104398	yes	TCONS_00026381	XLOC_014163	Snora74a	chr18:35713063-35717970	198
TCONS_00026385	gcKO	WT	63.4956	108.079	-0.767348	0.00145	0.0216237	yes	TCONS_00026385	XLOC_014165	Paip2	chr18:35758320-35786881	1424
TCONS_00026432	gcKO	WT	1742.61	755.176	1.20636	5e-05	0.00104398	yes	TCONS_00026432	XLOC_014182	Vaultrc5	chr18:36961416-36961761	345
TCONS_00026590	gcKO	WT	143.112	291.453	-1.02611	5e-05	0.00104398	yes	TCONS_00026590	XLOC_014252	1700034E13Rik	chr18:52805845-52823579	477
TCONS_00026657	gcKO	WT	19.4352	5.4354	1.83802	5e-05	0.00104398	yes	TCONS_00026657	XLOC_014285	Cd74	chr18:60963502-60972331	1223
TCONS_00026666	gcKO	WT	8.15429	4.46194	0.869742	0.00035	0.00592226	yes	TCONS_00026666	XLOC_014289	Csf1r	chr18:61265225-61290793	3875
TCONS_00026758	gcKO	WT	121.664	227.353	-0.902026	0.0011	0.016978	yes	TCONS_00026758	XLOC_014334	Stard6	chr18:70603312-70664855	1402
TCONS_00026953	gcKO	WT	209.472	376.482	-0.84582	0.00025	0.00433359	yes	TCONS_00026953	XLOC_014395	Cetn1	chr18:9615513-9619508	1051
TCONS_00027025	gcKO	WT	19.2585	34.9044	-0.85788	0.00285	0.038263	yes	TCONS_00027025	XLOC_014429	Ccdc178	chr18:21969388-22329897	3335
TCONS_00027142	gcKO	WT	438.63	843.85	-0.943981	0.00025	0.00433359	yes	TCONS_00027142	XLOC_014473	Spata24	chr18:35816134-35822203	710
TCONS_00027160	gcKO	WT	121.884	232.174	-0.929692	5e-05	0.00104398	yes	TCONS_00027160	XLOC_014484	Ndufa2	chr18:36894723-36904202	529
TCONS_00027178	gcKO	WT	7.8878	3.96508	0.992092	0.00305	0.0406322	yes	TCONS_00027178	XLOC_014494	NA	chr18:38348479-38350254	1464
TCONS_00027186	gcKO	WT	15.4284	8.52113	0.856396	5e-04	0.00825634	yes	TCONS_00027186	XLOC_014498	Gnpda1	chr18:38487190-38498647	2300
TCONS_00027198	gcKO	WT	21.5381	42.3362	-0.974968	0.0018	0.0259656	yes	TCONS_00027198	XLOC_014507	Plac8l1	chr18:42326592-42356363	763
TCONS_00027222	gcKO	WT	71.21	131.689	-0.886974	2e-04	0.00353476	yes	TCONS_00027222	XLOC_014523	Trim36	chr18:46324953-46372261	4545
TCONS_00027253	gcKO	WT	1754.39	0.001	19.7425	5e-05	0.00104398	yes	TCONS_00027253	XLOC_014542	NA	chr18:55279985-55286663	69
TCONS_00027403	gcKO	WT	4.48792	8.69634	-0.954206	0.00215	0.0300538	yes	TCONS_00027403	XLOC_014615	Ska1	chr18:74354952-74367472	2605
TCONS_00027413	gcKO	WT	17.0925	5.29279	1.69107	5e-05	0.00104398	yes	TCONS_00027413	XLOC_014619	Lipg	chr18:75098971-75121966	3787
TCONS_00027510	gcKO	WT	1318.04	0.001	19.33	5e-05	0.00104398	yes	TCONS_00027510	XLOC_014668	NA	chr18:4400167-4400225	58
TCONS_00027511	gcKO	WT	40.4357	0.001	14.3034	0.00225	0.0312537	yes	TCONS_00027511	XLOC_014669	NA	chr18:4544086-4544226	140
TCONS_00027514	gcKO	WT	2362.37	0.001	20.1718	5e-05	0.00104398	yes	TCONS_00027514	XLOC_014672	NA	chr18:4977715-4977777	62
TCONS_00027515	gcKO	WT	747.981	0.001	18.5126	5e-05	0.00104398	yes	TCONS_00027515	XLOC_014673	NA	chr18:5018057-5018144	87
TCONS_00027516	gcKO	WT	737.053	0.001	18.4914	5e-05	0.00104398	yes	TCONS_00027516	XLOC_014674	NA	chr18:5138761-5138840	79
TCONS_00027517	gcKO	WT	1473.75	0.001	19.4911	5e-05	0.00104398	yes	TCONS_00027517	XLOC_014675	NA	chr18:5142504-5142578	74
TCONS_00027518	gcKO	WT	536.424	0.001	18.033	5e-05	0.00104398	yes	TCONS_00027518	XLOC_014676	NA	chr18:5142965-5143050	85
TCONS_00027519	gcKO	WT	125.529	0.001	15.9377	5e-05	0.00104398	yes	TCONS_00027519	XLOC_014677	NA	chr18:5145199-5145335	136
TCONS_00027520	gcKO	WT	2663.36	0.001	20.3448	0.00355	0.0456397	yes	TCONS_00027520	XLOC_014678	NA	chr18:5434872-5434910	38
TCONS_00027523	gcKO	WT	1455.92	0.001	19.4735	5e-05	0.00104398	yes	TCONS_00027523	XLOC_014681	NA	chr18:5964204-5964264	60
TCONS_00027528	gcKO	WT	1404.05	0.001	19.4212	5e-05	0.00104398	yes	TCONS_00027528	XLOC_014686	NA	chr18:8191765-8191830	65
TCONS_00027529	gcKO	WT	965.283	0.001	18.8806	5e-05	0.00104398	yes	TCONS_00027529	XLOC_014687	NA	chr18:8920900-8920965	65
TCONS_00027531	gcKO	WT	497.371	0.001	17.924	5e-05	0.00104398	yes	TCONS_00027531	XLOC_014689	NA	chr18:9642630-9642719	89
TCONS_00027532	gcKO	WT	769.374	0.001	18.5533	5e-05	0.00104398	yes	TCONS_00027532	XLOC_014690	NA	chr18:9953246-9953316	70
TCONS_00027538	gcKO	WT	141.848	0.001	16.114	0.00015	0.00268331	yes	TCONS_00027538	XLOC_014696	NA	chr18:10841408-10841525	117
TCONS_00027544	gcKO	WT	1013.55	0.001	18.951	1e-04	0.00182757	yes	TCONS_00027544	XLOC_014702	NA	chr18:14632119-14632181	62
TCONS_00027549	gcKO	WT	1452.43	0.001	19.47	5e-05	0.00104398	yes	TCONS_00027549	XLOC_014707	NA	chr18:14926984-14927052	68
TCONS_00027562	gcKO	WT	0.001	2.93715	-10.5207	0.0012	0.0183009	yes	TCONS_00027562	XLOC_014720	NA	chr18:17191708-17192060	352
TCONS_00027567	gcKO	WT	1691.12	0.001	19.6895	5e-05	0.00104398	yes	TCONS_00027567	XLOC_014725	NA	chr18:17238316-17238372	56
TCONS_00027568	gcKO	WT	0.001	63.4368	-14.9531	0.00195	0.0275981	yes	TCONS_00027568	XLOC_014726	NA	chr18:17267679-17267810	131
TCONS_00027570	gcKO	WT	763.091	0.001	18.5415	5e-05	0.00104398	yes	TCONS_00027570	XLOC_014728	NA	chr18:17581479-17581584	105
TCONS_00027572	gcKO	WT	1053.03	0.001	19.0061	5e-05	0.00104398	yes	TCONS_00027572	XLOC_014730	NA	chr18:21146242-21146307	65
TCONS_00027575	gcKO	WT	0.001	285.814	-17.1247	0.00025	0.00433359	yes	TCONS_00027575	XLOC_014733	NA	chr18:21490785-21490875	90
TCONS_00027577	gcKO	WT	625.93	0.001	18.2556	5e-05	0.00104398	yes	TCONS_00027577	XLOC_014735	NA	chr18:23891620-23891699	79
TCONS_00027582	gcKO	WT	1146.66	0.001	19.129	5e-05	0.00104398	yes	TCONS_00027582	XLOC_014740	NA	chr18:24281991-24282059	68
TCONS_00027584	gcKO	WT	1365.73	0.001	19.3812	5e-05	0.00104398	yes	TCONS_00027584	XLOC_014742	NA	chr18:24810304-24810362	58
TCONS_00027585	gcKO	WT	577.781	0.001	18.1402	5e-05	0.00104398	yes	TCONS_00027585	XLOC_014743	NA	chr18:25629253-25629332	79
TCONS_00027586	gcKO	WT	5034.08	0.001	21.2633	5e-05	0.00104398	yes	TCONS_00027586	XLOC_014744	NA	chr18:26287942-26287981	39
TCONS_00027588	gcKO	WT	1288.07	0.001	19.2968	5e-05	0.00104398	yes	TCONS_00027588	XLOC_014746	NA	chr18:26452202-26452266	64
TCONS_00027592	gcKO	WT	699.431	0.001	18.4158	1e-04	0.00182757	yes	TCONS_00027592	XLOC_014750	NA	chr18:30355618-30355688	70
TCONS_00027594	gcKO	WT	0.001	2228.47	-20.0876	0.00195	0.0275981	yes	TCONS_00027594	XLOC_014752	NA	chr18:31555844-31555886	42
TCONS_00027597	gcKO	WT	1140.79	0.001	19.1216	5e-05	0.00104398	yes	TCONS_00027597	XLOC_014755	NA	chr18:32305369-32305434	65
TCONS_00027605	gcKO	WT	652.881	0.001	18.3165	5e-05	0.00104398	yes	TCONS_00027605	XLOC_014763	NA	chr18:35756904-35757014	110
TCONS_00027621	gcKO	WT	677.756	0.001	18.3704	5e-05	0.00104398	yes	TCONS_00027621	XLOC_014779	NA	chr18:38211911-38211988	77
TCONS_00027632	gcKO	WT	62.1326	0.001	14.9231	5e-05	0.00104398	yes	TCONS_00027632	XLOC_014790	NA	chr18:43241444-43241601	157
TCONS_00027634	gcKO	WT	1439.88	0.001	19.4575	5e-05	0.00104398	yes	TCONS_00027634	XLOC_014792	NA	chr18:43566266-43566323	57
TCONS_00027639	gcKO	WT	0.001	491.503	-17.9068	5e-05	0.00104398	yes	TCONS_00027639	XLOC_014797	NA	chr18:47297508-47297593	85
TCONS_00027642	gcKO	WT	529.633	0.001	18.0146	5e-05	0.00104398	yes	TCONS_00027642	XLOC_014800	NA	chr18:50888140-50888219	79
TCONS_00027645	gcKO	WT	1796.3	0.001	19.7766	5e-05	0.00104398	yes	TCONS_00027645	XLOC_014803	NA	chr18:52622593-52622646	53
TCONS_00027647	gcKO	WT	743.049	0.001	18.5031	5e-05	0.00104398	yes	TCONS_00027647	XLOC_014805	NA	chr18:53999697-53999780	83
TCONS_00027650	gcKO	WT	111.598	0.001	15.768	5e-05	0.00104398	yes	TCONS_00027650	XLOC_014808	NA	chr18:54230723-54230861	138
TCONS_00027652	gcKO	WT	596.444	0.001	18.186	5e-05	0.00104398	yes	TCONS_00027652	XLOC_014810	NA	chr18:54430296-54430380	84
TCONS_00027653	gcKO	WT	1012.06	0.001	18.9489	5e-05	0.00104398	yes	TCONS_00027653	XLOC_014811	NA	chr18:55580137-55580201	64
TCONS_00027654	gcKO	WT	1567.92	0.001	19.5804	5e-05	0.00104398	yes	TCONS_00027654	XLOC_014812	NA	chr18:55667009-55667069	60
TCONS_00027655	gcKO	WT	997.307	0.001	18.9277	5e-05	0.00104398	yes	TCONS_00027655	XLOC_014813	NA	chr18:55782187-55782274	87
TCONS_00027656	gcKO	WT	601.924	0.001	18.1992	5e-05	0.00104398	yes	TCONS_00027656	XLOC_014814	NA	chr18:55892494-55892574	80
TCONS_00027660	gcKO	WT	807.888	0.001	18.6238	5e-05	0.00104398	yes	TCONS_00027660	XLOC_014818	NA	chr18:56865709-56865802	93
TCONS_00027663	gcKO	WT	859.001	0.001	18.7123	5e-05	0.00104398	yes	TCONS_00027663	XLOC_014821	NA	chr18:57136898-57136986	88
TCONS_00027669	gcKO	WT	1885.9	0.001	19.8468	5e-05	0.00104398	yes	TCONS_00027669	XLOC_014827	NA	chr18:58571952-58572011	59
TCONS_00027677	gcKO	WT	1414.42	0.001	19.4318	5e-05	0.00104398	yes	TCONS_00027677	XLOC_014835	NA	chr18:61337439-61337498	59
TCONS_00027684	gcKO	WT	6.84459	17.7792	-1.37702	0.00035	0.00592226	yes	TCONS_00027684	XLOC_014842	NA	chr18:62089167-62089945	778
TCONS_00027687	gcKO	WT	364458	46484.6	2.97093	0.00045	0.00749931	yes	TCONS_00027687	XLOC_014845	NA	chr18:62938167-62938190	23
TCONS_00027701	gcKO	WT	1381.33	0.001	19.3976	1e-04	0.00182757	yes	TCONS_00027701	XLOC_014859	NA	chr18:68623952-68624008	56
TCONS_00027703	gcKO	WT	701.769	0.001	18.4206	5e-05	0.00104398	yes	TCONS_00027703	XLOC_014861	NA	chr18:68746048-68746131	83
TCONS_00027712	gcKO	WT	1034.53	0.001	18.9805	5e-05	0.00104398	yes	TCONS_00027712	XLOC_014870	NA	chr18:70714437-70714522	85
TCONS_00027714	gcKO	WT	6.5644	0.001	11.6807	0.0038	0.0484616	yes	TCONS_00027714	XLOC_014872	NA	chr18:73390105-73390335	230
TCONS_00027715	gcKO	WT	0.001	1769.31	-19.7548	0.0033	0.0430246	yes	TCONS_00027715	XLOC_014873	NA	chr18:73596880-73596924	44
TCONS_00027716	gcKO	WT	433.351	240.791	0.847752	0.002	0.0281652	yes	TCONS_00027716	XLOC_014874	NA	chr18:73692967-73693195	228
TCONS_00027725	gcKO	WT	625.621	0.001	18.2549	5e-05	0.00104398	yes	TCONS_00027725	XLOC_014883	NA	chr18:73927516-73927593	77
TCONS_00027729	gcKO	WT	553.781	0.001	18.079	5e-05	0.00104398	yes	TCONS_00027729	XLOC_014887	NA	chr18:75135482-75135599	117
TCONS_00027731	gcKO	WT	770.375	0.001	18.5552	5e-05	0.00104398	yes	TCONS_00027731	XLOC_014889	NA	chr18:75896239-75896318	79
TCONS_00027734	gcKO	WT	756.455	0.001	18.5289	5e-05	0.00104398	yes	TCONS_00027734	XLOC_014892	NA	chr18:76401202-76401274	72
TCONS_00027739	gcKO	WT	1675.08	0.001	19.6758	5e-05	0.00104398	yes	TCONS_00027739	XLOC_014897	NA	chr18:76896707-76896773	66
TCONS_00027746	gcKO	WT	105.86	0.001	15.6918	5e-05	0.00104398	yes	TCONS_00027746	XLOC_014904	NA	chr18:78009834-78009978	144
TCONS_00027748	gcKO	WT	0.001	209.207	-16.6746	0.00015	0.00268331	yes	TCONS_00027748	XLOC_014906	NA	chr18:79629552-79629660	108
TCONS_00027753	gcKO	WT	81.4679	0.001	15.314	1e-04	0.00182757	yes	TCONS_00027753	XLOC_014911	NA	chr18:80928221-80928363	142
TCONS_00027755	gcKO	WT	929.155	0.001	18.8256	5e-05	0.00104398	yes	TCONS_00027755	XLOC_014913	NA	chr18:81634962-81635029	67
TCONS_00027761	gcKO	WT	712.363	0.001	18.4423	5e-05	0.00104398	yes	TCONS_00027761	XLOC_014919	NA	chr18:81853759-81853846	87
TCONS_00027767	gcKO	WT	1272.26	0.001	19.279	5e-05	0.00104398	yes	TCONS_00027767	XLOC_014925	NA	chr18:82943961-82944032	71
TCONS_00027768	gcKO	WT	179.76	0.001	16.4557	5e-05	0.00104398	yes	TCONS_00027768	XLOC_014926	NA	chr18:82965792-82965903	111
TCONS_00027770	gcKO	WT	1111.24	0.001	19.0837	5e-05	0.00104398	yes	TCONS_00027770	XLOC_014928	NA	chr18:83009163-83009243	80
TCONS_00027772	gcKO	WT	1407.64	0.001	19.4248	5e-05	0.00104398	yes	TCONS_00027772	XLOC_014930	NA	chr18:83287603-83287680	77
TCONS_00027778	gcKO	WT	1542.78	0.001	19.5571	1e-04	0.00182757	yes	TCONS_00027778	XLOC_014936	NA	chr18:83400913-83400967	54
TCONS_00027783	gcKO	WT	860.654	0.001	18.7151	5e-05	0.00104398	yes	TCONS_00027783	XLOC_014941	NA	chr18:84141152-84141225	73
TCONS_00027785	gcKO	WT	1179	0.001	19.1691	5e-05	0.00104398	yes	TCONS_00027785	XLOC_014943	NA	chr18:84946620-84946694	74
TCONS_00027786	gcKO	WT	821.807	0.001	18.6484	5e-05	0.00104398	yes	TCONS_00027786	XLOC_014944	NA	chr18:85473430-85473521	91
TCONS_00027788	gcKO	WT	714.15	0.001	18.4459	3e-04	0.00513973	yes	TCONS_00027788	XLOC_014946	NA	chr18:86016396-86016459	63
TCONS_00027789	gcKO	WT	21.625	0.001	13.4005	0.00015	0.00268331	yes	TCONS_00027789	XLOC_014947	NA	chr18:86017573-86017778	205
TCONS_00027791	gcKO	WT	589.04	0.001	18.168	5e-05	0.00104398	yes	TCONS_00027791	XLOC_014949	NA	chr18:88812966-88813076	110
TCONS_00027794	gcKO	WT	6.19271	13.8584	-1.16199	0.00225	0.0312537	yes	TCONS_00027794	XLOC_014952	Mrpl21	chr19:3283046-3292837	917
TCONS_00027838	gcKO	WT	17.6711	4.71461	1.90596	0.0031	0.041243	yes	TCONS_00027838	XLOC_014967	Cdk2ap2	chr19:4097350-4099017	911
TCONS_00027861	gcKO	WT	13.1384	8.38957	0.647059	0.0039	0.0494037	yes	TCONS_00027861	XLOC_014978	Pcx	chr19:4510471-4621752	4148
TCONS_00027875	gcKO	WT	9.40118	16.2178	-0.7866	0.00025	0.00433359	yes	TCONS_00027875	XLOC_014984	Mrpl11	chr19:4962305-4966995	2882
TCONS_00027922	gcKO	WT	12.0758	4.25239	1.50555	9e-04	0.0142341	yes	TCONS_00027922	XLOC_015011	Slc25a45	chr19:5878465-5885783	1833
TCONS_00027948	gcKO	WT	2.74483	1.58754	0.789541	0.0035	0.0452754	yes	TCONS_00027948	XLOC_015026	Cdc42bpg	chr19:6306456-6325652	5994
TCONS_00027986	gcKO	WT	30.888	61.6053	-0.995985	0.00055	0.00903315	yes	TCONS_00027986	XLOC_015041	Atl3	chr19:7568168-7613426	6475
TCONS_00028107	gcKO	WT	3.36845	1.819	0.888575	0.0015	0.0223107	yes	TCONS_00028107	XLOC_015090	Patl1	chr19:11986888-12019586	4221
TCONS_00028167	gcKO	WT	2.09579	1.03821	1.0127	1e-04	0.00182757	yes	TCONS_00028167	XLOC_015138	Prune2	chr19:17030607-17298422	12512
TCONS_00028441	gcKO	WT	53.782	21.2838	1.33733	5e-05	0.00104398	yes	TCONS_00028441	XLOC_015273	Scd2	chr19:44368165-44381352	5451
TCONS_00028460	gcKO	WT	90.4482	26.1934	1.78785	5e-05	0.00104398	yes	TCONS_00028460	XLOC_015284	Lzts2	chr19:45089665-45120262	2773
TCONS_00028503	gcKO	WT	6.61802	3.57946	0.886473	0.0019	0.0272203	yes	TCONS_00028503	XLOC_015300	Tmem180	chr19:46431369-46449744	2280
TCONS_00028580	gcKO	WT	6.94355	12.5576	-0.854723	0.002	0.0281652	yes	TCONS_00028580	XLOC_015337	Acsl5	chr19:55327858-55371118	2685
TCONS_00028735	gcKO	WT	22.0702	13.2679	0.734116	0.00195	0.0275981	yes	TCONS_00028735	XLOC_015403	Rbm14	chr19:4800924-4811634	2809
TCONS_00028746	gcKO	WT	1.38116	2.78853	-1.0131	0.0027	0.0365208	yes	TCONS_00028746	XLOC_015411	Tmem151a	chr19:5079336-5085477	3945
TCONS_00028843	gcKO	WT	3.30421	1.22097	1.43553	0.001	0.0156412	yes	TCONS_00028843	XLOC_015449	Ppp2r5b	chr19:6226400-6235840	2708
TCONS_00028861	gcKO	WT	301.685	540.901	-0.842319	5e-05	0.00104398	yes	TCONS_00028861	XLOC_015457	Tex40	chr19:6996915-6999870	781
TCONS_00028889	gcKO	WT	64.2448	33.2657	0.949523	0.00015	0.00268331	yes	TCONS_00028889	XLOC_015469	Cox8a	chr19:7289647-7292106	545
TCONS_00028936	gcKO	WT	1079.74	669.152	0.690279	0.00335	0.0436192	yes	TCONS_00028936	XLOC_015488	5730408K05Rik	chr19:8962876-8963264	384
TCONS_00028945	gcKO	WT	50.4521	24.44	1.04564	4e-04	0.00672247	yes	TCONS_00028945	XLOC_015495	Fads2	chr19:10136733-10176294	3729
TCONS_00028979	gcKO	WT	3.44324	1.56246	1.13944	9e-04	0.0142341	yes	TCONS_00028979	XLOC_015509	Tmem132a	chr19:10917033-10944269	3489
TCONS_00028999	gcKO	WT	41.3586	81.8914	-0.985507	0.00085	0.0135078	yes	TCONS_00028999	XLOC_015520	Ms4a13	chr19:11243905-11271264	1341
TCONS_00029067	gcKO	WT	15.3212	23.5879	-0.622485	0.0039	0.0494037	yes	TCONS_00029067	XLOC_015564	Vps13a	chr19:16689855-16855423	11164
TCONS_00029079	gcKO	WT	13.1105	6.22238	1.07506	5e-05	0.00104398	yes	TCONS_00029079	XLOC_015572	Aldh1a7	chr19:20767442-20802046	2060
TCONS_00029130	gcKO	WT	4.71423	8.48247	-0.847326	5e-04	0.00825634	yes	TCONS_00029130	XLOC_015596	NA	chr19:29048748-29062753	2957
TCONS_00029151	gcKO	WT	49.7574	161.716	-1.70046	5e-05	0.00104398	yes	TCONS_00029151	XLOC_015607	Ppp1r2-ps3	chr19:30613365-30614169	804
TCONS_00029205	gcKO	WT	3.71911	1.29556	1.52066	0.00085	0.0135078	yes	TCONS_00029205	XLOC_015630	Ppp1r3c	chr19:36806220-36811094	2676
TCONS_00029284	gcKO	WT	2.71423	0.810667	1.74211	0.001	0.0156412	yes	TCONS_00029284	XLOC_015670	Pyroxd2	chr19:42800347-42827265	3119
TCONS_00029310	gcKO	WT	6.36492	2.55264	1.31781	5e-05	0.00104398	yes	TCONS_00029310	XLOC_015684	Scd1	chr19:44468939-44482199	4837
TCONS_00029328	gcKO	WT	298.593	0.001	17.1878	1e-04	0.00182757	yes	TCONS_00029328	XLOC_015696	NA	chr19:45765677-45766110	92
TCONS_00029402	gcKO	WT	31.3731	48.4537	-0.627063	0.00375	0.0479163	yes	TCONS_00029402	XLOC_015721	Wdr96	chr19:47811222-47911854	5947
TCONS_00029435	gcKO	WT	7.83106	3.80596	1.04075	0.00105	0.016314	yes	TCONS_00029435	XLOC_015733	Gpam	chr19:55142127-55173937	5924
TCONS_00029510	gcKO	WT	10.9717	6.04919	0.858866	0.00125	0.0189833	yes	TCONS_00029510	XLOC_015761	Csf2ra	chr19:61300304-61304321	1849
TCONS_00029512	gcKO	WT	1071.82	0.001	19.0316	5e-05	0.00104398	yes	TCONS_00029512	XLOC_015763	NA	chr19:3419084-3419166	82
TCONS_00029513	gcKO	WT	0.001	120.04	-15.8732	0.0033	0.0430246	yes	TCONS_00029513	XLOC_015764	NA	chr19:3840388-3840493	105
TCONS_00029515	gcKO	WT	710.742	0.001	18.439	5e-05	0.00104398	yes	TCONS_00029515	XLOC_015766	NA	chr19:4043008-4043094	86
TCONS_00029517	gcKO	WT	660.488	0.001	18.3332	5e-05	0.00104398	yes	TCONS_00029517	XLOC_015768	NA	chr19:4241385-4241468	83
TCONS_00029533	gcKO	WT	297.592	0.001	17.183	5e-05	0.00104398	yes	TCONS_00029533	XLOC_015784	NA	chr19:5615353-5615453	100
TCONS_00029538	gcKO	WT	21.6085	0.001	13.3994	3e-04	0.00513973	yes	TCONS_00029538	XLOC_015789	NA	chr19:5835899-5836084	185
TCONS_00029543	gcKO	WT	299.626	0.001	17.1928	5e-05	0.00104398	yes	TCONS_00029543	XLOC_015793	NA	chr19:6303369-6303483	114
TCONS_00029546	gcKO	WT	728.003	0.001	18.4736	5e-05	0.00104398	yes	TCONS_00029546	XLOC_015796	NA	chr19:7615518-7615603	85
TCONS_00029552	gcKO	WT	1218.7	0.001	19.2169	5e-05	0.00104398	yes	TCONS_00029552	XLOC_015802	NA	chr19:8598034-8598106	72
TCONS_00029553	gcKO	WT	1459.08	0.001	19.4766	1e-04	0.00182757	yes	TCONS_00029553	XLOC_015803	NA	chr19:8876578-8876633	55
TCONS_00029558	gcKO	WT	28.4322	0.001	13.7953	0.00355	0.0456397	yes	TCONS_00029558	XLOC_015808	NA	chr19:11983195-11983355	160
TCONS_00029559	gcKO	WT	425.349	0.001	17.6983	5e-05	0.00104398	yes	TCONS_00029559	XLOC_015809	NA	chr19:11985455-11985551	96
TCONS_00029563	gcKO	WT	1216.26	0.001	19.214	5e-05	0.00104398	yes	TCONS_00029563	XLOC_015813	NA	chr19:14848250-14848312	62
TCONS_00029566	gcKO	WT	1013.55	0.001	18.951	1e-04	0.00182757	yes	TCONS_00029566	XLOC_015816	NA	chr19:15591269-15591331	62
TCONS_00029577	gcKO	WT	669.613	0.001	18.353	1e-04	0.00182757	yes	TCONS_00029577	XLOC_015827	NA	chr19:21041025-21041096	71
TCONS_00029579	gcKO	WT	492.877	0.001	17.9109	5e-05	0.00104398	yes	TCONS_00029579	XLOC_015829	NA	chr19:21243726-21243857	131
TCONS_00029582	gcKO	WT	1418.96	0.001	19.4364	5e-05	0.00104398	yes	TCONS_00029582	XLOC_015832	NA	chr19:22017942-22018004	62
TCONS_00029586	gcKO	WT	0.001	419.052	-17.6768	5e-04	0.00825634	yes	TCONS_00029586	XLOC_015836	NA	chr19:23099368-23099446	78
TCONS_00029597	gcKO	WT	2121.63	0.001	20.0167	5e-05	0.00104398	yes	TCONS_00029597	XLOC_015847	NA	chr19:24632013-24632072	59
TCONS_00029600	gcKO	WT	487.636	0.001	17.8954	0.00055	0.00903315	yes	TCONS_00029600	XLOC_015850	NA	chr19:27197116-27197191	75
TCONS_00029601	gcKO	WT	873.27	0.001	18.7361	5e-05	0.00104398	yes	TCONS_00029601	XLOC_015851	NA	chr19:27335300-27335370	70
TCONS_00029602	gcKO	WT	2.93298	6.54672	-1.15813	0.00165	0.0240995	yes	TCONS_00029602	XLOC_015852	NA	chr19:27419210-27421043	1833
TCONS_00029608	gcKO	WT	276.834	0.001	17.0787	5e-05	0.00104398	yes	TCONS_00029608	XLOC_015858	NA	chr19:29438636-29438737	101
TCONS_00029613	gcKO	WT	1418.96	0.001	19.4364	5e-05	0.00104398	yes	TCONS_00029613	XLOC_015863	NA	chr19:32186729-32186791	62
TCONS_00029615	gcKO	WT	399.105	0.001	17.6064	5e-05	0.00104398	yes	TCONS_00029615	XLOC_015865	NA	chr19:32552983-32553084	101
TCONS_00029618	gcKO	WT	762.635	0.001	18.5406	5e-05	0.00104398	yes	TCONS_00029618	XLOC_015868	NA	chr19:34602082-34602171	89
TCONS_00029625	gcKO	WT	735.242	0.001	18.4879	5e-05	0.00104398	yes	TCONS_00029625	XLOC_015875	NA	chr19:36545126-36545201	75
TCONS_00029635	gcKO	WT	1470.48	0.001	19.4879	5e-05	0.00104398	yes	TCONS_00029635	XLOC_015885	NA	chr19:38200505-38200580	75
TCONS_00029636	gcKO	WT	2355.4	0.001	20.1675	1e-04	0.00182757	yes	TCONS_00029636	XLOC_015886	NA	chr19:38500729-38500776	47
TCONS_00029637	gcKO	WT	167148	370818	-1.14959	0.00045	0.00749931	yes	TCONS_00029637	XLOC_015887	NA	chr19:38583941-38583965	24
TCONS_00029644	gcKO	WT	1221.56	0.001	19.2203	5e-05	0.00104398	yes	TCONS_00029644	XLOC_015894	NA	chr19:41641407-41641478	71
TCONS_00029650	gcKO	WT	1916.99	0.001	19.8704	5e-05	0.00104398	yes	TCONS_00029650	XLOC_015900	NA	chr19:41666821-41666882	61
TCONS_00029652	gcKO	WT	618.481	0.001	18.2384	5e-05	0.00104398	yes	TCONS_00029652	XLOC_015902	NA	chr19:42162373-42162461	88
TCONS_00029653	gcKO	WT	1633	0.001	19.6391	1e-04	0.00182757	yes	TCONS_00029653	XLOC_015903	NA	chr19:42306021-42306074	53
TCONS_00029654	gcKO	WT	1114.9	0.001	19.0885	5e-05	0.00104398	yes	TCONS_00029654	XLOC_015904	NA	chr19:42312468-42312530	62
TCONS_00029655	gcKO	WT	589.5	0.001	18.1691	1e-04	0.00182757	yes	TCONS_00029655	XLOC_015905	NA	chr19:42554495-42554569	74
TCONS_00029656	gcKO	WT	780.912	0.001	18.5748	5e-05	0.00104398	yes	TCONS_00029656	XLOC_015906	NA	chr19:42564353-42564447	94
TCONS_00029657	gcKO	WT	494.567	0.001	17.9158	5e-05	0.00104398	yes	TCONS_00029657	XLOC_015907	NA	chr19:42780538-42780629	91
TCONS_00029659	gcKO	WT	1439.82	0.001	19.4575	5e-05	0.00104398	yes	TCONS_00029659	XLOC_015909	NA	chr19:42794613-42794680	67
TCONS_00029660	gcKO	WT	1256.31	0.001	19.2608	5e-05	0.00104398	yes	TCONS_00029660	XLOC_015910	NA	chr19:43500959-43501025	66
TCONS_00029670	gcKO	WT	1365.73	0.001	19.3812	5e-05	0.00104398	yes	TCONS_00029670	XLOC_015920	NA	chr19:46734975-46735033	58
TCONS_00029671	gcKO	WT	1568.44	0.001	19.5809	5e-05	0.00104398	yes	TCONS_00029671	XLOC_015921	NA	chr19:46736839-46736929	90
TCONS_00029680	gcKO	WT	275.221	0.001	17.0702	5e-05	0.00104398	yes	TCONS_00029680	XLOC_015930	NA	chr19:50033852-50033969	117
TCONS_00029682	gcKO	WT	1178.69	0.001	19.1688	1e-04	0.00182757	yes	TCONS_00029682	XLOC_015932	NA	chr19:51680557-51680616	59
TCONS_00029684	gcKO	WT	337.83	0.001	17.3659	5e-05	0.00104398	yes	TCONS_00029684	XLOC_015934	NA	chr19:53017047-53017199	152
TCONS_00029690	gcKO	WT	3194.99	0.001	20.6074	5e-05	0.00104398	yes	TCONS_00029690	XLOC_015940	NA	chr19:53202848-53202909	61
TCONS_00029695	gcKO	WT	1173.7	0.001	19.1626	5e-05	0.00104398	yes	TCONS_00029695	XLOC_015945	NA	chr19:53625543-53625639	96
TCONS_00029696	gcKO	WT	1447.97	0.001	19.4656	5e-05	0.00104398	yes	TCONS_00029696	XLOC_015946	NA	chr19:54527308-54527371	63
TCONS_00029701	gcKO	WT	539.336	0.001	18.0408	5e-05	0.00104398	yes	TCONS_00029701	XLOC_015951	NA	chr19:56168806-56168901	95
TCONS_00029702	gcKO	WT	165.133	0.001	16.3333	5e-05	0.00104398	yes	TCONS_00029702	XLOC_015952	NA	chr19:56179903-56180020	117
TCONS_00029719	gcKO	WT	705.745	0.001	18.4288	5e-05	0.00104398	yes	TCONS_00029719	XLOC_015969	NA	chr19:58656911-58656987	76
TCONS_00029731	gcKO	WT	1140.79	0.001	19.1216	5e-05	0.00104398	yes	TCONS_00029731	XLOC_015981	NA	chr19:60741074-60741139	65
TCONS_00029732	gcKO	WT	0.001	702.16	-18.4214	1e-04	0.00182757	yes	TCONS_00029732	XLOC_015982	NA	chr19:60827413-60827483	70
TCONS_00029733	gcKO	WT	1365.73	0.001	19.3812	5e-05	0.00104398	yes	TCONS_00029733	XLOC_015983	NA	chr19:61215535-61215593	58
TCONS_00029898	gcKO	WT	16.0368	4.34406	1.88403	0.00175	0.0253456	yes	TCONS_00029898	XLOC_016063	NA	chr2:11821554-11830493	678
TCONS_00029902	gcKO	WT	69.068	38.3749	0.847838	0.00015	0.00268331	yes	TCONS_00029902	XLOC_016067	Vim	chr2:13495937-13504453	1834
TCONS_00029905	gcKO	WT	40.0878	17.9039	1.16284	5e-05	0.00104398	yes	TCONS_00029905	XLOC_016070	Mrc1	chr2:14151040-14253650	5318
TCONS_00029919	gcKO	WT	240.607	0.001	16.8763	5e-05	0.00104398	yes	TCONS_00029919	XLOC_016078	NA	chr2:15853261-15901276	116
TCONS_00029938	gcKO	WT	18.4696	32.9611	-0.835577	2e-04	0.00353476	yes	TCONS_00029938	XLOC_016083	Bmi1	chr2:18598644-18608256	3594
TCONS_00029940	gcKO	WT	57.5569	90.6755	-0.655715	0.0032	0.0423041	yes	TCONS_00029940	XLOC_016084	BC061194	chr2:18620068-18671232	1651
TCONS_00029967	gcKO	WT	7.44815	13.675	-0.876499	0.00015	0.00268331	yes	TCONS_00029967	XLOC_016092	Thnsl1	chr2:21127350-21136636	3899
TCONS_00030166	gcKO	WT	16.1768	27.1816	-0.748668	0.0039	0.0494037	yes	TCONS_00030166	XLOC_016177	Coq4	chr2:29643347-29653263	1987
TCONS_00030265	gcKO	WT	7.03699	2.77245	1.34348	0.00015	0.00268331	yes	TCONS_00030265	XLOC_016213	Ppapdc3	chr2:31951170-31966340	1824
TCONS_00030295	gcKO	WT	7.24784	3.99759	0.858259	0.0038	0.0484616	yes	TCONS_00030295	XLOC_016219	Ptges2	chr2:32251409-32258260	1952
TCONS_00030299	gcKO	WT	22.8043	11.7673	0.954463	5e-05	0.00104398	yes	TCONS_00030299	XLOC_016221	Fam102a	chr2:32390878-32425270	4217
TCONS_00030473	gcKO	WT	134.448	224.3	-0.738377	0.00205	0.0288285	yes	TCONS_00030473	XLOC_016306	Gpd2	chr2:57090088-57234329	2416
TCONS_00030526	gcKO	WT	244.211	0.001	16.8978	1e-04	0.00182757	yes	TCONS_00030526	XLOC_016326	NA	chr2:66741142-66742406	98
TCONS_00030639	gcKO	WT	3.76229	1.21323	1.63195	0.0032	0.0423041	yes	TCONS_00030639	XLOC_016371	Hoxd9	chr2:74535819-74538265	2100
TCONS_00030697	gcKO	WT	15.9467	25.7552	-0.691571	0.002	0.0281652	yes	TCONS_00030697	XLOC_016402	NA	chr2:82783744-82849099	21161
TCONS_00030934	gcKO	WT	6.06454	3.58611	0.757814	0.00075	0.0120733	yes	TCONS_00030934	XLOC_016541	Abtb2	chr2:103406466-103558580	4558
TCONS_00030935	gcKO	WT	0.001	316.005	-17.2696	0.0013	0.0196599	yes	TCONS_00030935	XLOC_016542	NA	chr2:103651722-103658893	79
TCONS_00030980	gcKO	WT	339.86	0.001	17.3746	5e-05	0.00104398	yes	TCONS_00030980	XLOC_016559	NA	chr2:107706479-107721456	99
TCONS_00031069	gcKO	WT	15.8741	29.6038	-0.899065	0.00385	0.0489108	yes	TCONS_00031069	XLOC_016613	Knstrn	chr2:118639738-118661948	3118
TCONS_00031105	gcKO	WT	19.9747	12.6432	0.65977	0.0024	0.0329911	yes	TCONS_00031105	XLOC_016632	Tyro3	chr2:119625249-119643839	3988
TCONS_00031208	gcKO	WT	116.865	198.595	-0.764981	0.00045	0.00749931	yes	TCONS_00031208	XLOC_016673	Sqrdl	chr2:122591094-122635287	1619
TCONS_00031302	gcKO	WT	35.7785	15.7037	1.18794	0.0013	0.0196599	yes	TCONS_00031302	XLOC_016719	Nop56	chr2:130100147-130110204	2617
TCONS_00031312	gcKO	WT	29.7607	53.6891	-0.851199	0.00015	0.00268331	yes	TCONS_00031312	XLOC_016725	Tmem239	chr2:130232257-130233530	1139
TCONS_00031410	gcKO	WT	1.99396	0.720099	1.46809	0.00305	0.0406322	yes	TCONS_00031410	XLOC_016762	Btbd3	chr2:138082319-138113158	4638
TCONS_00031452	gcKO	WT	307.499	478.973	-0.639361	0.0027	0.0365208	yes	TCONS_00031452	XLOC_016783	Scp2d1	chr2:144649401-144650151	750
TCONS_00031484	gcKO	WT	67.9325	138.904	-1.0319	5e-05	0.00104398	yes	TCONS_00031484	XLOC_016802	Cstl1	chr2:148576088-148581562	610
TCONS_00031487	gcKO	WT	156.004	246.891	-0.662288	0.00155	0.022832	yes	TCONS_00031487	XLOC_016805	Cst8	chr2:148624574-148631320	703
TCONS_00031488	gcKO	WT	83.5371	138.641	-0.730858	0.00095	0.0149297	yes	TCONS_00031488	XLOC_016806	Cst13	chr2:148645834-148656146	765
TCONS_00031537	gcKO	WT	22.847	46.4942	-1.02501	5e-05	0.00104398	yes	TCONS_00031537	XLOC_016833	6820408C15Rik	chr2:152241322-152270064	1682
TCONS_00031622	gcKO	WT	9.8977	5.59491	0.822866	0.0026	0.0353488	yes	TCONS_00031622	XLOC_016867	Bpifb5	chr2:154049477-154066638	1637
TCONS_00031688	gcKO	WT	43.239	92.7736	-1.10136	1e-04	0.00182757	yes	TCONS_00031688	XLOC_016894	Cnbd2	chr2:156137581-156201374	2106
TCONS_00031740	gcKO	WT	38.9239	71.5148	-0.877569	3e-04	0.00513973	yes	TCONS_00031740	XLOC_016915	Adig	chr2:158328347-158333934	632
TCONS_00031819	gcKO	WT	36.2683	9.71338	1.90056	0.00155	0.022832	yes	TCONS_00031819	XLOC_016954	Pigt	chr2:164322678-164333803	2557
TCONS_00031822	gcKO	WT	69.5349	41.7558	0.735747	0.0035	0.0452754	yes	TCONS_00031822	XLOC_016957	Wfdc10	chr2:164481545-164482868	459
TCONS_00031882	gcKO	WT	11.2777	7.13048	0.661327	0.00355	0.0456397	yes	TCONS_00031882	XLOC_016990	Ptpn1	chr2:167757826-167804885	4213
TCONS_00031900	gcKO	WT	1070.21	0.001	19.0295	5e-05	0.00104398	yes	TCONS_00031900	XLOC_017003	NA	chr2:170958373-170962703	68
TCONS_00031910	gcKO	WT	4.80095	2.73003	0.814175	0.0029	0.0388424	yes	TCONS_00031910	XLOC_017007	Fam210b	chr2:172171076-172181249	3605
TCONS_00031918	gcKO	WT	152.128	246.003	-0.693387	0.0013	0.0196599	yes	TCONS_00031918	XLOC_017011	Fam209	chr2:172298053-172299816	649
TCONS_00031936	gcKO	WT	124.77	211.1	-0.758651	5e-04	0.00825634	yes	TCONS_00031936	XLOC_017020	1700021F07Rik	chr2:173348092-173354003	641
TCONS_00032162	gcKO	WT	3.65518	8.05029	-1.13888	5e-05	0.00104398	yes	TCONS_00032162	XLOC_017103	Mcm10	chr2:4911769-4933837	3494
TCONS_00032236	gcKO	WT	1.56245	0.694943	1.16769	0.00015	0.00268331	yes	TCONS_00032236	XLOC_017130	Cubn	chr2:13197964-13413503	11325
TCONS_00032257	gcKO	WT	261.656	480.937	-0.878174	5e-05	0.00104398	yes	TCONS_00032257	XLOC_017138	H2afb1	chr2:17900369-17918625	525
TCONS_00032270	gcKO	WT	86.1824	228.51	-1.40678	0.00065	0.0105706	yes	TCONS_00032270	XLOC_017143	4921504E06Rik	chr2:19384463-19475543	1658
TCONS_00032277	gcKO	WT	65.863	109.564	-0.734225	6e-04	0.00979359	yes	TCONS_00032277	XLOC_017147	Enkur	chr2:21102357-21126992	1199
TCONS_00032338	gcKO	WT	14.8817	7.81661	0.928837	0.0034	0.0441689	yes	TCONS_00032338	XLOC_017173	BC029214	chr2:25315007-25316614	975
TCONS_00032349	gcKO	WT	73.0513	120.306	-0.719719	0.00085	0.0135078	yes	TCONS_00032349	XLOC_017179	Phpt1	chr2:25428950-25430391	583
TCONS_00032376	gcKO	WT	4.22395	2.32522	0.860947	0.0022	0.0306664	yes	TCONS_00032376	XLOC_017189	Nacc2	chr2:25911055-25978331	6370
TCONS_00032409	gcKO	WT	2.84964	1.4365	0.987724	5e-05	0.00104398	yes	TCONS_00032409	XLOC_017201	Notch1	chr2:26313421-26359342	9489
TCONS_00032440	gcKO	WT	5.09178	2.43646	1.06307	5e-05	0.00104398	yes	TCONS_00032440	XLOC_017216	Sardh	chr2:27043912-27102823	4558
TCONS_00032442	gcKO	WT	17.192	4.65048	1.88606	5e-05	0.00104398	yes	TCONS_00032442	XLOC_017217	Vav2	chr2:27117621-27282345	4928
TCONS_00032461	gcKO	WT	286.356	449.71	-0.651183	0.00175	0.0253456	yes	TCONS_00032461	XLOC_017224	1700026L06Rik	chr2:28547599-28555171	671
TCONS_00032485	gcKO	WT	56.9846	87.5835	-0.620078	0.0033	0.0430246	yes	TCONS_00032485	XLOC_017234	D2Wsu81e	chr2:30027043-30033979	1838
TCONS_00032542	gcKO	WT	39.6053	17.8637	1.14862	5e-05	0.00104398	yes	TCONS_00032542	XLOC_017257	1110008P14Rik	chr2:32234620-32237435	657
TCONS_00032543	gcKO	WT	208.166	81.3137	1.35615	5e-05	0.00104398	yes	TCONS_00032543	XLOC_017258	Lcn2	chr2:32240156-32243286	853
TCONS_00032793	gcKO	WT	834.961	0.001	18.6714	5e-05	0.00104398	yes	TCONS_00032793	XLOC_017364	NA	chr2:64060988-64061543	106
TCONS_00032823	gcKO	WT	31.5438	51.4538	-0.705903	0.0016	0.0234468	yes	TCONS_00032823	XLOC_017380	Ccdc173	chr2:69596113-69627543	1731
TCONS_00032849	gcKO	WT	26.1319	41.9737	-0.683653	0.0028	0.0376809	yes	TCONS_00032849	XLOC_017392	Cir1	chr2:73121928-73175864	1945
TCONS_00032900	gcKO	WT	59.2106	99.8894	-0.754466	8e-04	0.012821	yes	TCONS_00032900	XLOC_017409	Cyct	chr2:76191999-76198505	652
TCONS_00032946	gcKO	WT	37.8498	64.9581	-0.779208	0.00035	0.00592226	yes	TCONS_00032946	XLOC_017425	Zswim2	chr2:83755235-83781383	2062
TCONS_00032965	gcKO	WT	12.1708	4.17421	1.54362	0.00275	0.037096	yes	TCONS_00032965	XLOC_017429	Ctnnd1	chr2:84440876-84499143	5046
TCONS_00033011	gcKO	WT	74.5922	1.02115	6.18937	5e-05	0.00104398	yes	TCONS_00033011	XLOC_017461	Olfr1044	chr2:86011027-86011972	945
TCONS_00033245	gcKO	WT	22.871	5.7296	1.99682	5e-05	0.00104398	yes	TCONS_00033245	XLOC_017623	Mir670	chr2:94092027-94105076	1043
TCONS_00033297	gcKO	WT	2.18967	4.67664	-1.09441	0.00025	0.00433359	yes	TCONS_00033297	XLOC_017646	Tcp11l1	chr2:104520136-104552319	3512
TCONS_00033361	gcKO	WT	7.82318	13.6428	-0.802234	0.0025	0.0342118	yes	TCONS_00033361	XLOC_017688	BC125332	chr2:112088099-112101582	3731
TCONS_00033403	gcKO	WT	1.15082	2.47946	-1.10669	0.0035	0.0452754	yes	TCONS_00033403	XLOC_017709	Gpr176	chr2:118102833-118199155	3911
TCONS_00033541	gcKO	WT	7.70068	4.46819	0.78516	6e-04	0.00979359	yes	TCONS_00033541	XLOC_017772	Secisbp2l	chr2:125562721-125608606	6797
TCONS_00033668	gcKO	WT	12.7192	7.26988	0.806919	0.00045	0.00749931	yes	TCONS_00033668	XLOC_017823	Cenpb	chr2:131003024-131005748	2724
TCONS_00033738	gcKO	WT	3585.25	663.357	2.43421	5e-05	0.00104398	yes	TCONS_00033738	XLOC_017858	Snord17	chr2:144075856-144096638	221
TCONS_00033763	gcKO	WT	4.30998	0.824475	2.38472	0.0011	0.016978	yes	TCONS_00033763	XLOC_017874	9230104L09Rik	chr2:148670970-148676976	2443
TCONS_00033776	gcKO	WT	5.2654	2.30095	1.19396	0.00355	0.0456397	yes	TCONS_00033776	XLOC_017882	Acss1	chr2:150443724-150494668	3594
TCONS_00033809	gcKO	WT	18.1345	32.8997	-0.859302	0.00315	0.0417543	yes	TCONS_00033809	XLOC_017896	Fam110a	chr2:151795092-151805955	1843
TCONS_00033816	gcKO	WT	4.54974	1.46991	1.62939	5e-05	0.00104398	yes	TCONS_00033816	XLOC_017900	Sox12	chr2:152219347-152223782	4435
TCONS_00033822	gcKO	WT	427.149	261.829	0.706112	0.00125	0.0189833	yes	TCONS_00033822	XLOC_017906	Defb19	chr2:152401821-152406048	394
TCONS_00033914	gcKO	WT	11.1657	22.633	-1.01929	5e-05	0.00104398	yes	TCONS_00033914	XLOC_017938	Uqcc	chr2:155672621-155756046	2668
TCONS_00033956	gcKO	WT	4.57904	2.27082	1.01151	1e-04	0.00182757	yes	TCONS_00033956	XLOC_017953	9830001H06Rik	chr2:156836177-156905001	13232
TCONS_00033973	gcKO	WT	11.1137	6.49634	0.774548	0.00075	0.0120733	yes	TCONS_00033973	XLOC_017961	Tgm2	chr2:157942140-157972128	3549
TCONS_00034008	gcKO	WT	1.95672	0.001	9.93496	3e-04	0.00513973	yes	TCONS_00034008	XLOC_017979	NA	chr2:163800236-163805193	508
TCONS_00034023	gcKO	WT	34.4428	17.6126	0.967555	5e-05	0.00104398	yes	TCONS_00034023	XLOC_017991	Sdc4	chr2:164249746-164268688	2460
TCONS_00034111	gcKO	WT	4.63225	11.951	-1.36716	0.00385	0.0489108	yes	TCONS_00034111	XLOC_018022	NA	chr2:166723974-166731452	916
TCONS_00034123	gcKO	WT	4.61557	8.56987	-0.89262	5e-05	0.00104398	yes	TCONS_00034123	XLOC_018025	Kcnb1	chr2:166921468-167014318	11153
TCONS_00034234	gcKO	WT	258.128	420.692	-0.704676	0.0016	0.0234468	yes	TCONS_00034234	XLOC_018068	Atp5e	chr2:174286575-174289602	414
TCONS_00034374	gcKO	WT	881.267	0.001	18.7492	5e-05	0.00104398	yes	TCONS_00034374	XLOC_018123	NA	chr2:3911628-3911713	85
TCONS_00034376	gcKO	WT	1925.74	0.001	19.877	5e-05	0.00104398	yes	TCONS_00034376	XLOC_018125	NA	chr2:7701916-7701978	62
TCONS_00034379	gcKO	WT	0.001	202.212	-16.6255	0.00155	0.022832	yes	TCONS_00034379	XLOC_018128	NA	chr2:11818389-11818483	94
TCONS_00034380	gcKO	WT	0.001	133.471	-16.0262	0.00155	0.022832	yes	TCONS_00034380	XLOC_018129	NA	chr2:11888430-11888537	107
TCONS_00034381	gcKO	WT	2181.15	0.001	20.0567	5e-05	0.00104398	yes	TCONS_00034381	XLOC_018130	NA	chr2:13428668-13428742	74
TCONS_00034383	gcKO	WT	1455.92	0.001	19.4735	5e-05	0.00104398	yes	TCONS_00034383	XLOC_018132	NA	chr2:15472924-15472984	60
TCONS_00034387	gcKO	WT	37.8376	0.001	14.2076	5e-05	0.00104398	yes	TCONS_00034387	XLOC_018136	NA	chr2:17961137-17961389	252
TCONS_00034390	gcKO	WT	1605.32	0.001	19.6144	5e-05	0.00104398	yes	TCONS_00034390	XLOC_018139	NA	chr2:18724037-18724105	68
TCONS_00034393	gcKO	WT	94.3444	0.001	15.5257	5e-05	0.00104398	yes	TCONS_00034393	XLOC_018142	NA	chr2:19655557-19655692	135
TCONS_00034394	gcKO	WT	370.925	0.001	17.5008	5e-05	0.00104398	yes	TCONS_00034394	XLOC_018143	NA	chr2:21878560-21878651	91
TCONS_00034398	gcKO	WT	130.17	0.001	15.99	1e-04	0.00182757	yes	TCONS_00034398	XLOC_018147	NA	chr2:21991299-21991418	119
TCONS_00034401	gcKO	WT	794.822	0.001	18.6003	5e-05	0.00104398	yes	TCONS_00034401	XLOC_018150	NA	chr2:25031599-25031701	102
TCONS_00034402	gcKO	WT	1621.67	0.001	19.6291	5e-05	0.00104398	yes	TCONS_00034402	XLOC_018151	NA	chr2:25310781-25310843	62
TCONS_00034409	gcKO	WT	570.552	0.001	18.122	5e-05	0.00104398	yes	TCONS_00034409	XLOC_018158	NA	chr2:26483685-26483767	82
TCONS_00034410	gcKO	WT	1507.57	0.001	19.5238	5e-05	0.00104398	yes	TCONS_00034410	XLOC_018159	NA	chr2:26633797-26633863	66
TCONS_00034411	gcKO	WT	77.01	0.001	15.2328	0.0017	0.0247116	yes	TCONS_00034411	XLOC_018160	NA	chr2:26743004-26743128	124
TCONS_00034412	gcKO	WT	1277.99	0.001	19.2854	5e-05	0.00104398	yes	TCONS_00034412	XLOC_018161	NA	chr2:27298165-27298226	61
TCONS_00034416	gcKO	WT	249.816	0.001	16.9305	5e-05	0.00104398	yes	TCONS_00034416	XLOC_018165	NA	chr2:27707413-27707516	103
TCONS_00034423	gcKO	WT	184.088	0.001	16.49	1e-04	0.00182757	yes	TCONS_00034423	XLOC_018172	NA	chr2:30313261-30313368	107
TCONS_00034424	gcKO	WT	579.087	0.001	18.1434	5e-05	0.00104398	yes	TCONS_00034424	XLOC_018173	NA	chr2:30474222-30474303	81
TCONS_00034425	gcKO	WT	1119.94	0.001	19.095	1e-04	0.00182757	yes	TCONS_00034425	XLOC_018174	NA	chr2:30510202-30510262	60
TCONS_00034426	gcKO	WT	890.903	0.001	18.7649	5e-05	0.00104398	yes	TCONS_00034426	XLOC_018175	NA	chr2:30513129-30513210	81
TCONS_00034429	gcKO	WT	1836.34	0.001	19.8084	5e-05	0.00104398	yes	TCONS_00034429	XLOC_018178	NA	chr2:31227537-31227598	61
TCONS_00034430	gcKO	WT	937.458	0.001	18.8384	5e-05	0.00104398	yes	TCONS_00034430	XLOC_018179	NA	chr2:31270119-31270190	71
TCONS_00034431	gcKO	WT	431.469	0.001	17.7189	5e-05	0.00104398	yes	TCONS_00034431	XLOC_018180	NA	chr2:31277468-31277563	95
TCONS_00034434	gcKO	WT	2015.89	0.001	19.943	5e-05	0.00104398	yes	TCONS_00034434	XLOC_018183	NA	chr2:31540501-31540561	60
TCONS_00034436	gcKO	WT	15730.5	0.001	22.9071	0.00015	0.00268331	yes	TCONS_00034436	XLOC_018185	NA	chr2:32006460-32006485	25
TCONS_00034450	gcKO	WT	921.296	0.001	18.8133	5e-05	0.00104398	yes	TCONS_00034450	XLOC_018199	NA	chr2:36937135-36937201	66
TCONS_00034453	gcKO	WT	943.199	0.001	18.8472	5e-05	0.00104398	yes	TCONS_00034453	XLOC_018202	NA	chr2:38527435-38527509	74
TCONS_00034454	gcKO	WT	1310.4	0.001	19.3216	5e-05	0.00104398	yes	TCONS_00034454	XLOC_018203	NA	chr2:38543628-38543692	64
TCONS_00034455	gcKO	WT	11.2478	21.2603	-0.918459	0.00185	0.0265711	yes	TCONS_00034455	XLOC_018204	NA	chr2:38860761-38861579	818
TCONS_00034459	gcKO	WT	837.542	0.001	18.6758	1e-04	0.00182757	yes	TCONS_00034459	XLOC_018208	NA	chr2:39478072-39478138	66
TCONS_00034461	gcKO	WT	675.496	0.001	18.3656	5e-05	0.00104398	yes	TCONS_00034461	XLOC_018210	NA	chr2:39685785-39685863	78
TCONS_00034468	gcKO	WT	587.947	0.001	18.1653	5e-05	0.00104398	yes	TCONS_00034468	XLOC_018217	NA	chr2:44768086-44768169	83
TCONS_00034470	gcKO	WT	1031.47	0.001	18.9763	5e-05	0.00104398	yes	TCONS_00034470	XLOC_018219	NA	chr2:45137961-45138037	76
TCONS_00034471	gcKO	WT	565.571	0.001	18.1094	1e-04	0.00182757	yes	TCONS_00034471	XLOC_018220	NA	chr2:45413100-45413175	75
TCONS_00034472	gcKO	WT	1104.06	0.001	19.0744	5e-05	0.00104398	yes	TCONS_00034472	XLOC_018221	NA	chr2:45479180-45479244	64
TCONS_00034473	gcKO	WT	1461.99	0.001	19.4795	5e-05	0.00104398	yes	TCONS_00034473	XLOC_018222	NA	chr2:47163024-47163093	69
TCONS_00034474	gcKO	WT	565.571	0.001	18.1094	1e-04	0.00182757	yes	TCONS_00034474	XLOC_018223	NA	chr2:48405456-48405531	75
TCONS_00034476	gcKO	WT	165.133	0.001	16.3333	5e-05	0.00104398	yes	TCONS_00034476	XLOC_018225	NA	chr2:49221929-49222046	117
TCONS_00034480	gcKO	WT	961.47	0.001	18.8749	5e-05	0.00104398	yes	TCONS_00034480	XLOC_018229	NA	chr2:52604524-52604599	75
TCONS_00034481	gcKO	WT	601.924	0.001	18.1992	5e-05	0.00104398	yes	TCONS_00034481	XLOC_018230	NA	chr2:56093216-56093296	80
TCONS_00034483	gcKO	WT	0.001	288.298	-17.1372	0.00155	0.022832	yes	TCONS_00034483	XLOC_018232	NA	chr2:58431521-58431605	84
TCONS_00034487	gcKO	WT	463.019	0.001	17.8207	1e-04	0.00182757	yes	TCONS_00034487	XLOC_018236	NA	chr2:59721235-59721315	80
TCONS_00034490	gcKO	WT	471.604	0.001	17.8472	5e-05	0.00104398	yes	TCONS_00034490	XLOC_018239	NA	chr2:59727666-59727748	82
TCONS_00034491	gcKO	WT	597.169	0.001	18.1878	5e-05	0.00104398	yes	TCONS_00034491	XLOC_018240	NA	chr2:60046357-60046433	76
TCONS_00034496	gcKO	WT	1279.84	0.001	19.2875	5e-05	0.00104398	yes	TCONS_00034496	XLOC_018245	NA	chr2:63961020-63961087	67
TCONS_00034497	gcKO	WT	56.1312	0.001	14.7765	5e-05	0.00104398	yes	TCONS_00034497	XLOC_018246	NA	chr2:65077139-65077299	160
TCONS_00034498	gcKO	WT	1591.33	0.001	19.6018	5e-05	0.00104398	yes	TCONS_00034498	XLOC_018247	NA	chr2:65077601-65077667	66
TCONS_00034502	gcKO	WT	2515.78	0.001	20.2626	1e-04	0.00182757	yes	TCONS_00034502	XLOC_018251	NA	chr2:68311921-68311967	46
TCONS_00034509	gcKO	WT	636.207	0.001	18.2791	5e-05	0.00104398	yes	TCONS_00034509	XLOC_018258	NA	chr2:69733962-69734046	84
TCONS_00034510	gcKO	WT	0.001	20.0396	-13.2906	0.00195	0.0275981	yes	TCONS_00034510	XLOC_018259	NA	chr2:70320720-70320905	185
TCONS_00034513	gcKO	WT	463.657	0.001	17.8227	5e-05	0.00104398	yes	TCONS_00034513	XLOC_018262	NA	chr2:71035151-71035242	91
TCONS_00034514	gcKO	WT	1178.69	0.001	19.1688	1e-04	0.00182757	yes	TCONS_00034514	XLOC_018263	NA	chr2:71493834-71493893	59
TCONS_00034522	gcKO	WT	1140.79	0.001	19.1216	5e-05	0.00104398	yes	TCONS_00034522	XLOC_018271	NA	chr2:73225452-73225517	65
TCONS_00034528	gcKO	WT	637.327	0.001	18.2817	5e-05	0.00104398	yes	TCONS_00034528	XLOC_018277	NA	chr2:74628321-74628432	111
TCONS_00034531	gcKO	WT	736.575	0.001	18.4905	5e-05	0.00104398	yes	TCONS_00034531	XLOC_018280	NA	chr2:74993371-74993442	71
TCONS_00034534	gcKO	WT	2268.79	0.001	20.1135	5e-05	0.00104398	yes	TCONS_00034534	XLOC_018283	NA	chr2:75235551-75235631	80
TCONS_00034536	gcKO	WT	446.681	0.001	17.7689	5e-05	0.00104398	yes	TCONS_00034536	XLOC_018285	NA	chr2:75488567-75488655	88
TCONS_00034540	gcKO	WT	983.072	0.001	18.9069	5e-05	0.00104398	yes	TCONS_00034540	XLOC_018289	NA	chr2:75826361-75826447	86
TCONS_00034541	gcKO	WT	1178.69	0.001	19.1688	1e-04	0.00182757	yes	TCONS_00034541	XLOC_018290	NA	chr2:76447566-76447625	59
TCONS_00034545	gcKO	WT	4262.97	0.001	21.0234	5e-05	0.00104398	yes	TCONS_00034545	XLOC_018294	NA	chr2:78309136-78309176	40
TCONS_00034548	gcKO	WT	1171.49	0.001	19.1599	5e-05	0.00104398	yes	TCONS_00034548	XLOC_018297	NA	chr2:78768506-78768567	61
TCONS_00034550	gcKO	WT	920.052	0.001	18.8114	1e-04	0.00182757	yes	TCONS_00034550	XLOC_018299	NA	chr2:80738913-80738977	64
TCONS_00034564	gcKO	WT	1045.9	0.001	18.9963	5e-05	0.00104398	yes	TCONS_00034564	XLOC_018313	NA	chr2:84437821-84437890	69
TCONS_00034572	gcKO	WT	1349.29	0.001	19.3638	0.00015	0.00268331	yes	TCONS_00034572	XLOC_018321	NA	chr2:90890796-90890853	57
TCONS_00034576	gcKO	WT	1570.78	0.001	19.5831	5e-05	0.00104398	yes	TCONS_00034576	XLOC_018325	NA	chr2:91805326-91805383	57
TCONS_00034585	gcKO	WT	877.194	0.001	18.7425	5e-05	0.00104398	yes	TCONS_00034585	XLOC_018334	NA	chr2:92922798-92922867	69
TCONS_00034586	gcKO	WT	584.121	0.001	18.1559	5e-05	0.00104398	yes	TCONS_00034586	XLOC_018335	NA	chr2:92940229-92940317	88
TCONS_00034594	gcKO	WT	965.316	0.001	18.8806	1e-04	0.00182757	yes	TCONS_00034594	XLOC_018343	NA	chr2:93812676-93812739	63
TCONS_00034595	gcKO	WT	1256.31	0.001	19.2608	5e-05	0.00104398	yes	TCONS_00034595	XLOC_018344	NA	chr2:93998330-93998396	66
TCONS_00034596	gcKO	WT	302.935	0.001	17.2087	5e-05	0.00104398	yes	TCONS_00034596	XLOC_018345	NA	chr2:94085265-94085375	110
TCONS_00034600	gcKO	WT	688.681	0.001	18.3935	0.002	0.0281652	yes	TCONS_00034600	XLOC_018349	NA	chr2:96175671-96175732	61
TCONS_00034601	gcKO	WT	1189.03	0.001	19.1814	5e-05	0.00104398	yes	TCONS_00034601	XLOC_018350	NA	chr2:99376732-99376802	70
TCONS_00034612	gcKO	WT	728.842	0.001	18.4752	5e-05	0.00104398	yes	TCONS_00034612	XLOC_018361	NA	chr2:103958582-103958664	82
TCONS_00034616	gcKO	WT	736.575	0.001	18.4905	5e-05	0.00104398	yes	TCONS_00034616	XLOC_018365	NA	chr2:104507595-104507666	71
TCONS_00034618	gcKO	WT	1489.89	0.001	19.5068	5e-05	0.00104398	yes	TCONS_00034618	XLOC_018367	NA	chr2:105332722-105332780	58
TCONS_00034619	gcKO	WT	1113.63	0.001	19.0868	5e-05	0.00104398	yes	TCONS_00034619	XLOC_018368	NA	chr2:105367170-105367251	81
TCONS_00034620	gcKO	WT	92.4059	0.001	15.4957	5e-05	0.00104398	yes	TCONS_00034620	XLOC_018369	NA	chr2:105929368-105929533	165
TCONS_00034621	gcKO	WT	868.609	0.001	18.7283	5e-05	0.00104398	yes	TCONS_00034621	XLOC_018370	NA	chr2:106192133-106192209	76
TCONS_00034622	gcKO	WT	1614.04	0.001	19.6222	5e-05	0.00104398	yes	TCONS_00034622	XLOC_018371	NA	chr2:106238871-106238929	58
TCONS_00034628	gcKO	WT	1206.84	0.001	19.2028	0.00095	0.0149297	yes	TCONS_00034628	XLOC_018377	NA	chr2:111140931-111140984	53
TCONS_00034633	gcKO	WT	1074.04	0.001	19.0346	0.00355	0.0456397	yes	TCONS_00034633	XLOC_018382	NA	chr2:117528355-117528406	51
TCONS_00034643	gcKO	WT	705.745	0.001	18.4288	5e-05	0.00104398	yes	TCONS_00034643	XLOC_018392	NA	chr2:120453754-120453830	76
TCONS_00034654	gcKO	WT	1381.33	0.001	19.3976	1e-04	0.00182757	yes	TCONS_00034654	XLOC_018403	NA	chr2:122204872-122204928	56
TCONS_00034657	gcKO	WT	751.361	0.001	18.5191	5e-05	0.00104398	yes	TCONS_00034657	XLOC_018406	NA	chr2:122885642-122885720	78
TCONS_00034673	gcKO	WT	2262.28	0.001	20.1093	5e-05	0.00104398	yes	TCONS_00034673	XLOC_018422	NA	chr2:128089872-128089947	75
TCONS_00034686	gcKO	WT	1834.1	0.001	19.8066	5e-05	0.00104398	yes	TCONS_00034686	XLOC_018435	NA	chr2:129372286-129372349	63
TCONS_00034688	gcKO	WT	770.375	0.001	18.5552	5e-05	0.00104398	yes	TCONS_00034688	XLOC_018437	NA	chr2:129663355-129663434	79
TCONS_00034695	gcKO	WT	1119.94	0.001	19.095	1e-04	0.00182757	yes	TCONS_00034695	XLOC_018444	NA	chr2:131309374-131309434	60
TCONS_00034697	gcKO	WT	890.903	0.001	18.7649	5e-05	0.00104398	yes	TCONS_00034697	XLOC_018446	NA	chr2:131816382-131816463	81
TCONS_00034698	gcKO	WT	1178.69	0.001	19.1688	1e-04	0.00182757	yes	TCONS_00034698	XLOC_018447	NA	chr2:133419251-133419310	59
TCONS_00034703	gcKO	WT	0.001	208.049	-16.6666	0.00365	0.0467589	yes	TCONS_00034703	XLOC_018452	NA	chr2:136355917-136356004	87
TCONS_00034704	gcKO	WT	2422.58	0.001	20.2081	5e-05	0.00104398	yes	TCONS_00034704	XLOC_018453	NA	chr2:137132253-137132305	52
TCONS_00034706	gcKO	WT	1459.08	0.001	19.4766	1e-04	0.00182757	yes	TCONS_00034706	XLOC_018455	NA	chr2:138613266-138613321	55
TCONS_00034707	gcKO	WT	1538.75	0.001	19.5533	5e-05	0.00104398	yes	TCONS_00034707	XLOC_018456	NA	chr2:138686884-138686954	70
TCONS_00034708	gcKO	WT	635.16	0.001	18.2768	5e-05	0.00104398	yes	TCONS_00034708	XLOC_018457	NA	chr2:139899233-139899321	88
TCONS_00034714	gcKO	WT	645.858	0.001	18.3009	5e-05	0.00104398	yes	TCONS_00034714	XLOC_018463	NA	chr2:144071336-144071420	84
TCONS_00034721	gcKO	WT	2826.49	0.001	20.4306	5e-05	0.00104398	yes	TCONS_00034721	XLOC_018470	NA	chr2:147263056-147263103	47
TCONS_00034723	gcKO	WT	1247.54	0.001	19.2507	5e-05	0.00104398	yes	TCONS_00034723	XLOC_018472	NA	chr2:149564418-149564506	88
TCONS_00034739	gcKO	WT	845.047	0.001	18.6887	5e-05	0.00104398	yes	TCONS_00034739	XLOC_018488	NA	chr2:151496223-151496312	89
TCONS_00034740	gcKO	WT	1730.41	0.001	19.7227	1e-04	0.00182757	yes	TCONS_00034740	XLOC_018489	NA	chr2:151815348-151815400	52
TCONS_00034743	gcKO	WT	0.001	1155.6	-19.1402	5e-04	0.00825634	yes	TCONS_00034743	XLOC_018492	NA	chr2:152328606-152328662	56
TCONS_00034746	gcKO	WT	537.467	0.001	18.0358	5e-05	0.00104398	yes	TCONS_00034746	XLOC_018495	NA	chr2:153039164-153039256	92
TCONS_00034753	gcKO	WT	782.265	0.001	18.5773	5e-05	0.00104398	yes	TCONS_00034753	XLOC_018502	NA	chr2:153677269-153677366	97
TCONS_00034754	gcKO	WT	332.63	0.001	17.3436	5e-05	0.00104398	yes	TCONS_00034754	XLOC_018503	NA	chr2:154252570-154252675	105
TCONS_00034755	gcKO	WT	1096.42	0.001	19.0644	5e-05	0.00104398	yes	TCONS_00034755	XLOC_018504	NA	chr2:154482031-154482124	93
TCONS_00034757	gcKO	WT	1459.08	0.001	19.4766	1e-04	0.00182757	yes	TCONS_00034757	XLOC_018506	NA	chr2:154616093-154616148	55
TCONS_00034763	gcKO	WT	1737.22	0.001	19.7284	5e-05	0.00104398	yes	TCONS_00034763	XLOC_018512	NA	chr2:156226909-156226985	76
TCONS_00034770	gcKO	WT	870.497	0.001	18.7315	5e-05	0.00104398	yes	TCONS_00034770	XLOC_018519	NA	chr2:157304041-157304112	71
TCONS_00034778	gcKO	WT	0.001	66.019	-15.0106	0.00025	0.00433359	yes	TCONS_00034778	XLOC_018527	NA	chr2:157725375-157725518	143
TCONS_00034779	gcKO	WT	356.182	0.001	17.4423	1e-04	0.00182757	yes	TCONS_00034779	XLOC_018528	NA	chr2:157727007-157727094	87
TCONS_00034784	gcKO	WT	1598.36	0.001	19.6082	5e-05	0.00104398	yes	TCONS_00034784	XLOC_018533	NA	chr2:159738437-159738510	73
TCONS_00034788	gcKO	WT	1032.01	0.001	18.977	5e-05	0.00104398	yes	TCONS_00034788	XLOC_018537	NA	chr2:160402879-160402962	83
TCONS_00034790	gcKO	WT	2576.84	0.001	20.2972	0.00025	0.00433359	yes	TCONS_00034790	XLOC_018539	NA	chr2:160741449-160741495	46
TCONS_00034793	gcKO	WT	472.814	0.001	17.8509	5e-05	0.00104398	yes	TCONS_00034793	XLOC_018542	NA	chr2:163158724-163158823	99
TCONS_00034795	gcKO	WT	877.53	0.001	18.7431	1e-04	0.00182757	yes	TCONS_00034795	XLOC_018544	NA	chr2:163247549-163247614	65
TCONS_00034802	gcKO	WT	1162.77	0.001	19.1491	5e-05	0.00104398	yes	TCONS_00034802	XLOC_018551	NA	chr2:164362454-164362538	84
TCONS_00034813	gcKO	WT	0.001	8188.9	-21.9652	5e-05	0.00104398	yes	TCONS_00034813	XLOC_018562	NA	chr2:164925296-164925335	39
TCONS_00034814	gcKO	WT	132.045	0.001	16.0107	5e-05	0.00104398	yes	TCONS_00034814	XLOC_018563	NA	chr2:166080696-166080820	124
TCONS_00034818	gcKO	WT	1356.69	0.001	19.3717	0.00095	0.0149297	yes	TCONS_00034818	XLOC_018567	NA	chr2:166210343-166210394	51
TCONS_00034819	gcKO	WT	701.137	0.001	18.4193	5e-05	0.00104398	yes	TCONS_00034819	XLOC_018568	NA	chr2:166213666-166213761	95
TCONS_00034820	gcKO	WT	730.996	0.001	18.4795	1e-04	0.00182757	yes	TCONS_00034820	XLOC_018569	NA	chr2:166271736-166271805	69
TCONS_00034821	gcKO	WT	416.359	0.001	17.6675	5e-05	0.00104398	yes	TCONS_00034821	XLOC_018570	NA	chr2:166298265-166298368	103
TCONS_00034823	gcKO	WT	1065	0.001	19.0224	1e-04	0.00182757	yes	TCONS_00034823	XLOC_018572	NA	chr2:166629351-166629412	61
TCONS_00034825	gcKO	WT	614.753	0.001	18.2296	1e-04	0.00182757	yes	TCONS_00034825	XLOC_018574	NA	chr2:166904825-166904898	73
TCONS_00034829	gcKO	WT	1519.81	0.001	19.5355	5e-05	0.00104398	yes	TCONS_00034829	XLOC_018578	NA	chr2:167668210-167668277	67
TCONS_00034830	gcKO	WT	1489.89	0.001	19.5068	5e-05	0.00104398	yes	TCONS_00034830	XLOC_018579	NA	chr2:167880504-167880562	58
TCONS_00034832	gcKO	WT	759.056	0.001	18.5338	5e-05	0.00104398	yes	TCONS_00034832	XLOC_018581	NA	chr2:168144035-168144141	106
TCONS_00034833	gcKO	WT	799.902	0.001	18.6095	1e-04	0.00182757	yes	TCONS_00034833	XLOC_018582	NA	chr2:168228926-168228993	67
TCONS_00034835	gcKO	WT	1131.14	0.001	19.1093	5e-05	0.00104398	yes	TCONS_00034835	XLOC_018584	NA	chr2:168891565-168891640	75
TCONS_00034837	gcKO	WT	82777.7	0.001	25.3027	5e-05	0.00104398	yes	TCONS_00034837	XLOC_018586	NA	chr2:169044014-169044032	18
TCONS_00034842	gcKO	WT	1461.99	0.001	19.4795	5e-05	0.00104398	yes	TCONS_00034842	XLOC_018591	NA	chr2:169778826-169778895	69
TCONS_00034844	gcKO	WT	431.736	0.001	17.7198	5e-05	0.00104398	yes	TCONS_00034844	XLOC_018593	NA	chr2:169848126-169848251	125
TCONS_00034849	gcKO	WT	764.82	0.001	18.5448	5e-05	0.00104398	yes	TCONS_00034849	XLOC_018598	NA	chr2:170306127-170306199	72
TCONS_00034853	gcKO	WT	0.001	199.839	-16.6085	0.00195	0.0275981	yes	TCONS_00034853	XLOC_018602	NA	chr2:170841711-170841803	92
TCONS_00034856	gcKO	WT	762.635	0.001	18.5406	5e-05	0.00104398	yes	TCONS_00034856	XLOC_018605	NA	chr2:171707273-171707362	89
TCONS_00034858	gcKO	WT	428.731	0.001	17.7097	1e-04	0.00182757	yes	TCONS_00034858	XLOC_018607	NA	chr2:171892164-171892246	82
TCONS_00034867	gcKO	WT	757.03	0.001	18.53	5e-05	0.00104398	yes	TCONS_00034867	XLOC_018616	NA	chr2:172822806-172822903	97
TCONS_00034873	gcKO	WT	881.267	0.001	18.7492	5e-05	0.00104398	yes	TCONS_00034873	XLOC_018622	NA	chr2:173391366-173391451	85
TCONS_00034877	gcKO	WT	464.213	0.001	17.8244	5e-05	0.00104398	yes	TCONS_00034877	XLOC_018626	NA	chr2:173768089-173768178	89
TCONS_00034883	gcKO	WT	1336.35	0.001	19.3499	5e-05	0.00104398	yes	TCONS_00034883	XLOC_018631	NA	chr2:174300038-174300119	81
TCONS_00034885	gcKO	WT	1114.7	0.001	19.0882	5e-05	0.00104398	yes	TCONS_00034885	XLOC_018633	NA	chr2:174386906-174386988	82
TCONS_00034887	gcKO	WT	1085.76	0.001	19.0503	5e-05	0.00104398	yes	TCONS_00034887	XLOC_018635	NA	chr2:174674903-174674979	76
TCONS_00034888	gcKO	WT	260.338	0.001	16.99	5e-05	0.00104398	yes	TCONS_00034888	XLOC_018636	NA	chr2:174758251-174758370	119
TCONS_00034890	gcKO	WT	1347.52	0.001	19.3619	5e-05	0.00104398	yes	TCONS_00034890	XLOC_018638	NA	chr2:178301070-178301169	99
TCONS_00034893	gcKO	WT	701.769	0.001	18.4206	5e-05	0.00104398	yes	TCONS_00034893	XLOC_018641	NA	chr2:179822894-179822977	83
TCONS_00034894	gcKO	WT	909.259	0.001	18.7943	5e-05	0.00104398	yes	TCONS_00034894	XLOC_018642	NA	chr2:179852369-179852439	70
TCONS_00034898	gcKO	WT	2029.51	0.001	19.9527	5e-05	0.00104398	yes	TCONS_00034898	XLOC_018646	NA	chr2:179985863-179985929	66
TCONS_00034903	gcKO	WT	1657.59	0.001	19.6607	5e-05	0.00104398	yes	TCONS_00034903	XLOC_018651	NA	chr2:180281842-180281898	56
TCONS_00034904	gcKO	WT	1539.42	0.001	19.554	5e-05	0.00104398	yes	TCONS_00034904	XLOC_018652	NA	chr2:180283152-180283224	72
TCONS_00034906	gcKO	WT	832.957	0.001	18.6679	5e-05	0.00104398	yes	TCONS_00034906	XLOC_018654	NA	chr2:180305746-180305864	118
TCONS_00034912	gcKO	WT	1004.42	0.001	18.9379	5e-05	0.00104398	yes	TCONS_00034912	XLOC_018660	NA	chr2:180784273-180784344	71
TCONS_00034915	gcKO	WT	31.5961	0.001	13.9475	0.00245	0.0336202	yes	TCONS_00034915	XLOC_018663	NA	chr2:181327627-181327781	154
TCONS_00034916	gcKO	WT	1290.98	0.001	19.3	5e-05	0.00104398	yes	TCONS_00034916	XLOC_018664	NA	chr2:181392400-181392473	73
TCONS_00034965	gcKO	WT	47.3748	77.5622	-0.711222	8e-04	0.012821	yes	TCONS_00034965	XLOC_018694	Car2	chr3:14886425-14900770	1790
TCONS_00034981	gcKO	WT	365.984	610.867	-0.739076	0.0031	0.041243	yes	TCONS_00034981	XLOC_018700	Cypt12	chr3:17848394-17850080	509
TCONS_00035068	gcKO	WT	65.0538	32.3063	1.0098	5e-05	0.00104398	yes	TCONS_00035068	XLOC_018731	Cldn11	chr3:31048841-31063248	1872
TCONS_00035312	gcKO	WT	3.18012	1.75329	0.858648	0.0032	0.0423041	yes	TCONS_00035312	XLOC_018827	Rap2b	chr3:61168428-61172625	4197
TCONS_00035336	gcKO	WT	307.046	605.521	-0.97972	5e-05	0.00104398	yes	TCONS_00035336	XLOC_018839	Mlf1	chr3:67178018-67203922	1116
TCONS_00035466	gcKO	WT	5.54269	3.02755	0.872219	0.0018	0.0259656	yes	TCONS_00035466	XLOC_018898	Mef2d	chr3:87946316-87981910	4756
TCONS_00035589	gcKO	WT	21.6808	10.2945	1.07447	5e-05	0.00104398	yes	TCONS_00035589	XLOC_018939	Slc39a1	chr3:90052113-90057534	2344
TCONS_00035591	gcKO	WT	6.92022	3.76877	0.87655	0.0021	0.0294586	yes	TCONS_00035591	XLOC_018940	Crtc2	chr3:90058202-90068047	2629
TCONS_00035652	gcKO	WT	3.74587	1.31204	1.51278	0.00065	0.0105706	yes	TCONS_00035652	XLOC_018990	Rorc	chr3:94176747-94202161	2503
TCONS_00035814	gcKO	WT	61.7963	35.4474	0.801823	1e-04	0.00182757	yes	TCONS_00035814	XLOC_019048	Hmgcs2	chr3:98083811-98114661	3294
TCONS_00035827	gcKO	WT	43.2326	76.3478	-0.820453	2e-04	0.00353476	yes	TCONS_00035827	XLOC_019055	4930406D18Rik	chr3:100230327-100241677	691
TCONS_00035852	gcKO	WT	33.193	84.5002	-1.34805	5e-05	0.00104398	yes	TCONS_00035852	XLOC_019068	Bcas2	chr3:102975633-102983077	1413
TCONS_00035992	gcKO	WT	2.736	1.07964	1.34071	5e-05	0.00104398	yes	TCONS_00035992	XLOC_019124	Col11a1	chr3:113733457-113923244	7275
TCONS_00036024	gcKO	WT	7.53422	4.18211	0.849074	0.00295	0.039419	yes	TCONS_00036024	XLOC_019143	Cnn3	chr3:121129458-121161123	2003
TCONS_00036084	gcKO	WT	577.927	0.001	18.1405	5e-05	0.00104398	yes	TCONS_00036084	XLOC_019179	NA	chr3:129849577-129854276	83
TCONS_00036158	gcKO	WT	12.1664	5.90896	1.0418	0.00035	0.00592226	yes	TCONS_00036158	XLOC_019210	Adh1	chr3:137940608-137953655	1334
TCONS_00036162	gcKO	WT	25.7755	15.918	0.695307	0.0022	0.0306664	yes	TCONS_00036162	XLOC_019214	Adh5	chr3:138106127-138118463	1533
TCONS_00036163	gcKO	WT	27.6007	48.0785	-0.800665	0.0021	0.0294586	yes	TCONS_00036163	XLOC_019215	Eif4e	chr3:138188294-138220563	4529
TCONS_00036280	gcKO	WT	84.6593	168.396	-0.992109	5e-05	0.00104398	yes	TCONS_00036280	XLOC_019267	Asb17	chr3:153507210-153516579	1048
TCONS_00036415	gcKO	WT	26.9231	43.703	-0.698867	0.00145	0.0216237	yes	TCONS_00036415	XLOC_019339	Actrt3	chr3:30495994-30498792	1892
TCONS_00036416	gcKO	WT	81.9923	136.613	-0.736527	0.0026	0.0353488	yes	TCONS_00036416	XLOC_019340	Lrrc34	chr3:30523188-30571355	1840
TCONS_00036430	gcKO	WT	620.701	0.001	18.2435	5e-05	0.00104398	yes	TCONS_00036430	XLOC_019345	NA	chr3:31573689-31581373	85
TCONS_00036444	gcKO	WT	32.6539	59.4291	-0.863894	0.00375	0.0479163	yes	TCONS_00036444	XLOC_019351	Ccdc39	chr3:33699116-33743232	3616
TCONS_00036678	gcKO	WT	42.0334	103.891	-1.30544	5e-05	0.00104398	yes	TCONS_00036678	XLOC_019466	Zbbx	chr3:74841731-74969407	2418
TCONS_00036688	gcKO	WT	2.4248	0.950029	1.3509	0.00285	0.038263	yes	TCONS_00036688	XLOC_019472	Rapgef2	chr3:78866450-78977067	6676
TCONS_00036794	gcKO	WT	29.6303	63.6458	-1.10297	5e-05	0.00104398	yes	TCONS_00036794	XLOC_019516	Ttc24	chr3:87873331-87882226	1084
TCONS_00036829	gcKO	WT	11.3169	2.48057	2.18928	0.00125	0.0189833	yes	TCONS_00036829	XLOC_019530	NA	chr3:88398908-88411276	943
TCONS_00036925	gcKO	WT	9.41819	5.59912	0.750145	0.0032	0.0423041	yes	TCONS_00036925	XLOC_019558	Slc27a3	chr3:90189154-90193849	2265
TCONS_00036930	gcKO	WT	22.345	14.3403	0.639841	0.0024	0.0329911	yes	TCONS_00036930	XLOC_019560	Npr1	chr3:90254513-90270289	4065
TCONS_00036986	gcKO	WT	110.923	244.449	-1.13997	5e-05	0.00104398	yes	TCONS_00036986	XLOC_019602	Riiad1	chr3:94268906-94277513	628
TCONS_00036996	gcKO	WT	13.591	5.8033	1.22756	0.00215	0.0300538	yes	TCONS_00036996	XLOC_019606	Cgn	chr3:94563989-94590437	5038
TCONS_00037131	gcKO	WT	51.6914	23.0638	1.16426	5e-05	0.00104398	yes	TCONS_00037131	XLOC_019656	Hsd3b6	chr3:98545398-98618366	1802
TCONS_00037133	gcKO	WT	31.0106	10.705	1.53439	3e-04	0.00513973	yes	TCONS_00037133	XLOC_019657	Hsd3b1	chr3:98646281-98663717	1852
TCONS_00037150	gcKO	WT	55.1607	29.3427	0.910616	5e-05	0.00104398	yes	TCONS_00037150	XLOC_019667	Atp1a1	chr3:101380141-101408630	3702
TCONS_00037232	gcKO	WT	110.83	203.626	-0.877567	0.00015	0.00268331	yes	TCONS_00037232	XLOC_019706	Ubl4b	chr3:107356615-107357991	1376
TCONS_00037254	gcKO	WT	314.51	151.709	1.05179	7e-04	0.0113235	yes	TCONS_00037254	XLOC_019715	Gstm1	chr3:107784554-107833731	1294
TCONS_00037319	gcKO	WT	50.4162	25.0643	1.00822	0.0012	0.0183009	yes	TCONS_00037319	XLOC_019747	Vcam1	chr3:115812937-115832606	1611
TCONS_00037388	gcKO	WT	124.507	29.3082	2.08681	5e-05	0.00104398	yes	TCONS_00037388	XLOC_019775	Snhg8	chr3:123210340-123211830	785
TCONS_00037393	gcKO	WT	472.597	0.001	17.8503	5e-05	0.00104398	yes	TCONS_00037393	XLOC_019777	NA	chr3:123731380-123749176	102
TCONS_00037530	gcKO	WT	14.1968	22.6575	-0.674385	0.0017	0.0247116	yes	TCONS_00037530	XLOC_019846	Wdr63	chr3:145703489-145771000	3082
TCONS_00037609	gcKO	WT	833.433	0.001	18.6687	5e-05	0.00104398	yes	TCONS_00037609	XLOC_019882	NA	chr3:5576775-5576855	80
TCONS_00037610	gcKO	WT	1187.7	0.001	19.1797	5e-05	0.00104398	yes	TCONS_00037610	XLOC_019883	NA	chr3:6125461-6125536	75
TCONS_00037613	gcKO	WT	1842.59	0.001	19.8133	5e-05	0.00104398	yes	TCONS_00037613	XLOC_019886	NA	chr3:8465073-8465139	66
TCONS_00037615	gcKO	WT	699.431	0.001	18.4158	1e-04	0.00182757	yes	TCONS_00037615	XLOC_019888	NA	chr3:8757578-8757648	70
TCONS_00037616	gcKO	WT	3635.34	8240.44	-1.18063	5e-05	0.00104398	yes	TCONS_00037616	XLOC_019889	NA	chr3:9244282-9244384	102
TCONS_00037620	gcKO	WT	1278.34	0.001	19.2858	5e-05	0.00104398	yes	TCONS_00037620	XLOC_019893	NA	chr3:10306938-10307001	63
TCONS_00037622	gcKO	WT	2249.54	0.001	20.1012	5e-05	0.00104398	yes	TCONS_00037622	XLOC_019895	NA	chr3:16119784-16119836	52
TCONS_00037623	gcKO	WT	769.709	0.001	18.554	5e-05	0.00104398	yes	TCONS_00037623	XLOC_019896	NA	chr3:16771834-16771906	72
TCONS_00037646	gcKO	WT	0.001	196.375	-16.5833	0.0033	0.0430246	yes	TCONS_00037646	XLOC_019919	NA	chr3:24450509-24450599	90
TCONS_00037647	gcKO	WT	877.53	0.001	18.7431	1e-04	0.00182757	yes	TCONS_00037647	XLOC_019920	NA	chr3:24891095-24891160	65
TCONS_00037648	gcKO	WT	674.078	0.001	18.3626	5e-05	0.00104398	yes	TCONS_00037648	XLOC_019921	NA	chr3:26536186-26536265	79
TCONS_00037649	gcKO	WT	412.805	0.001	17.6551	1e-04	0.00182757	yes	TCONS_00037649	XLOC_019922	NA	chr3:26976101-26976184	83
TCONS_00037653	gcKO	WT	2249.54	0.001	20.1012	5e-05	0.00104398	yes	TCONS_00037653	XLOC_019926	NA	chr3:28763369-28763421	52
TCONS_00037655	gcKO	WT	1302.36	0.001	19.3127	5e-05	0.00104398	yes	TCONS_00037655	XLOC_019928	NA	chr3:29936947-29937025	78
TCONS_00037656	gcKO	WT	388.171	0.001	17.5663	5e-05	0.00104398	yes	TCONS_00037656	XLOC_019929	NA	chr3:30673584-30673676	92
TCONS_00037658	gcKO	WT	1202.18	0.001	19.1972	5e-05	0.00104398	yes	TCONS_00037658	XLOC_019931	NA	chr3:31608339-31608417	78
TCONS_00037668	gcKO	WT	0.001	4.10375	-11.0031	4e-04	0.00672247	yes	TCONS_00037668	XLOC_019941	NA	chr3:34154244-34154591	347
TCONS_00037671	gcKO	WT	860.654	0.001	18.7151	5e-05	0.00104398	yes	TCONS_00037671	XLOC_019944	NA	chr3:34346069-34346142	73
TCONS_00037680	gcKO	WT	0.001	1272.28	-19.279	0.0033	0.0430246	yes	TCONS_00037680	XLOC_019953	NA	chr3:34800187-34800236	49
TCONS_00037684	gcKO	WT	418.346	0.001	17.6743	5e-05	0.00104398	yes	TCONS_00037684	XLOC_019957	NA	chr3:35074789-35074883	94
TCONS_00037685	gcKO	WT	557.795	0.001	18.0894	5e-05	0.00104398	yes	TCONS_00037685	XLOC_019958	NA	chr3:35595548-35595642	94
TCONS_00037686	gcKO	WT	536.424	0.001	18.033	5e-05	0.00104398	yes	TCONS_00037686	XLOC_019959	NA	chr3:35788109-35788194	85
TCONS_00037691	gcKO	WT	276.131	0.001	17.075	5e-05	0.00104398	yes	TCONS_00037691	XLOC_019964	NA	chr3:37629118-37629225	107
TCONS_00037692	gcKO	WT	1228.54	0.001	19.2285	5e-05	0.00104398	yes	TCONS_00037692	XLOC_019965	NA	chr3:37657990-37658055	65
TCONS_00037694	gcKO	WT	1013.55	0.001	18.951	1e-04	0.00182757	yes	TCONS_00037694	XLOC_019967	NA	chr3:38561145-38561207	62
TCONS_00037710	gcKO	WT	1061.85	0.001	19.0182	5e-05	0.00104398	yes	TCONS_00037710	XLOC_019983	NA	chr3:41211882-41211945	63
TCONS_00037712	gcKO	WT	769.709	0.001	18.554	5e-05	0.00104398	yes	TCONS_00037712	XLOC_019985	NA	chr3:43426510-43426582	72
TCONS_00037713	gcKO	WT	990.566	0.001	18.9179	5e-05	0.00104398	yes	TCONS_00037713	XLOC_019986	NA	chr3:43435533-43435610	77
TCONS_00037715	gcKO	WT	1094.21	0.001	19.0615	5e-05	0.00104398	yes	TCONS_00037715	XLOC_019988	NA	chr3:46068914-46069003	89
TCONS_00037716	gcKO	WT	39.7393	0.001	14.2783	5e-05	0.00104398	yes	TCONS_00037716	XLOC_019989	NA	chr3:48797492-48797735	243
TCONS_00037720	gcKO	WT	1018.64	0.001	18.9582	5e-05	0.00104398	yes	TCONS_00037720	XLOC_019993	NA	chr3:49061925-49062005	80
TCONS_00037721	gcKO	WT	1002.15	0.001	18.9347	5e-05	0.00104398	yes	TCONS_00037721	XLOC_019994	NA	chr3:50118201-50118275	74
TCONS_00037723	gcKO	WT	1199.1	0.001	19.1935	5e-05	0.00104398	yes	TCONS_00037723	XLOC_019996	NA	chr3:50619938-50620015	77
TCONS_00037729	gcKO	WT	833.433	0.001	18.6687	5e-05	0.00104398	yes	TCONS_00037729	XLOC_020002	NA	chr3:51989850-51989930	80
TCONS_00037730	gcKO	WT	625.93	0.001	18.2556	5e-05	0.00104398	yes	TCONS_00037730	XLOC_020003	NA	chr3:52292106-52292185	79
TCONS_00037732	gcKO	WT	11030.6	0.001	22.395	1e-04	0.00182757	yes	TCONS_00037732	XLOC_020005	NA	chr3:52532466-52532495	29
TCONS_00037737	gcKO	WT	1896.81	0.001	19.8551	5e-05	0.00104398	yes	TCONS_00037737	XLOC_020010	NA	chr3:55045131-55045186	55
TCONS_00037738	gcKO	WT	354.611	0.001	17.4359	5e-05	0.00104398	yes	TCONS_00037738	XLOC_020011	NA	chr3:55988066-55988165	99
TCONS_00037739	gcKO	WT	1365.73	0.001	19.3812	5e-05	0.00104398	yes	TCONS_00037739	XLOC_020012	NA	chr3:57380553-57380611	58
TCONS_00037748	gcKO	WT	0.001	18.1511	-13.1478	2e-04	0.00353476	yes	TCONS_00037748	XLOC_020021	NA	chr3:60589137-60589329	192
TCONS_00037755	gcKO	WT	737.704	0.001	18.4927	5e-05	0.00104398	yes	TCONS_00037755	XLOC_020028	NA	chr3:64720154-64720227	73
TCONS_00037760	gcKO	WT	1916.99	0.001	19.8704	5e-05	0.00104398	yes	TCONS_00037760	XLOC_020033	NA	chr3:65419482-65419543	61
TCONS_00037765	gcKO	WT	2939.4	0.001	20.4871	5e-05	0.00104398	yes	TCONS_00037765	XLOC_020038	NA	chr3:65732093-65732146	53
TCONS_00037769	gcKO	WT	1013.55	0.001	18.951	1e-04	0.00182757	yes	TCONS_00037769	XLOC_020042	NA	chr3:67560058-67560120	62
TCONS_00037770	gcKO	WT	757.267	0.001	18.5304	5e-05	0.00104398	yes	TCONS_00037770	XLOC_020043	NA	chr3:67563998-67564079	81
TCONS_00037772	gcKO	WT	4.67188	9.90284	-1.08368	6e-04	0.00979359	yes	TCONS_00037772	XLOC_020045	NA	chr3:68848893-68850518	1625
TCONS_00037777	gcKO	WT	541.266	0.001	18.046	5e-05	0.00104398	yes	TCONS_00037777	XLOC_020050	NA	chr3:69060347-69060450	103
TCONS_00037779	gcKO	WT	5.79306	0.001	11.5004	0.00225	0.0312537	yes	TCONS_00037779	XLOC_020052	NA	chr3:69361821-69362073	252
TCONS_00037780	gcKO	WT	1171.49	0.001	19.1599	5e-05	0.00104398	yes	TCONS_00037780	XLOC_020053	NA	chr3:69503127-69503188	61
TCONS_00037784	gcKO	WT	1085.76	0.001	19.0503	5e-05	0.00104398	yes	TCONS_00037784	XLOC_020057	NA	chr3:75506622-75506698	76
TCONS_00037792	gcKO	WT	0.001	691.805	-18.4	0.0027	0.0365208	yes	TCONS_00037792	XLOC_020065	NA	chr3:83382249-83382308	59
TCONS_00037793	gcKO	WT	728.003	0.001	18.4736	5e-05	0.00104398	yes	TCONS_00037793	XLOC_020066	NA	chr3:83569674-83569759	85
TCONS_00037794	gcKO	WT	179.76	0.001	16.4557	5e-05	0.00104398	yes	TCONS_00037794	XLOC_020067	NA	chr3:83599985-83600096	111
TCONS_00037795	gcKO	WT	746.481	0.001	18.5097	5e-05	0.00104398	yes	TCONS_00037795	XLOC_020068	NA	chr3:83878489-83878581	92
TCONS_00037798	gcKO	WT	698.987	0.001	18.4149	5e-05	0.00104398	yes	TCONS_00037798	XLOC_020071	NA	chr3:84292144-84292229	85
TCONS_00037805	gcKO	WT	607.868	0.001	18.2134	5e-05	0.00104398	yes	TCONS_00037805	XLOC_020078	NA	chr3:85302657-85302777	120
TCONS_00037810	gcKO	WT	922.129	0.001	18.8146	5e-05	0.00104398	yes	TCONS_00037810	XLOC_020083	NA	chr3:87691638-87691711	73
TCONS_00037816	gcKO	WT	104.945	0.001	15.6793	5e-05	0.00104398	yes	TCONS_00037816	XLOC_020089	NA	chr3:88308175-88308329	154
TCONS_00037823	gcKO	WT	4325.97	0.001	21.0446	5e-05	0.00104398	yes	TCONS_00037823	XLOC_020096	NA	chr3:89135023-89135067	44
TCONS_00037828	gcKO	WT	0.001	255.671	-16.9639	0.001	0.0156412	yes	TCONS_00037828	XLOC_020101	NA	chr3:90051824-90051912	88
TCONS_00037834	gcKO	WT	1004.42	0.001	18.9379	5e-05	0.00104398	yes	TCONS_00037834	XLOC_020107	NA	chr3:92408744-92408815	71
TCONS_00037835	gcKO	WT	886.799	0.001	18.7582	5e-05	0.00104398	yes	TCONS_00037835	XLOC_020108	NA	chr3:92461082-92461178	96
TCONS_00037836	gcKO	WT	130.17	0.001	15.99	1e-04	0.00182757	yes	TCONS_00037836	XLOC_020109	NA	chr3:93237710-93237829	119
TCONS_00037838	gcKO	WT	397.63	0.001	17.6011	1e-04	0.00182757	yes	TCONS_00037838	XLOC_020111	NA	chr3:93961887-93961971	84
TCONS_00037843	gcKO	WT	1406.19	0.001	19.4234	5e-05	0.00104398	yes	TCONS_00037843	XLOC_020116	NA	chr3:94473722-94473793	71
TCONS_00037845	gcKO	WT	837.542	0.001	18.6758	1e-04	0.00182757	yes	TCONS_00037845	XLOC_020118	NA	chr3:94830752-94830818	66
TCONS_00037849	gcKO	WT	312.948	0.001	17.2556	5e-05	0.00104398	yes	TCONS_00037849	XLOC_020122	NA	chr3:95473249-95473356	107
TCONS_00037856	gcKO	WT	1675.08	0.001	19.6758	5e-05	0.00104398	yes	TCONS_00037856	XLOC_020129	NA	chr3:96328718-96328784	66
TCONS_00037857	gcKO	WT	923.39	0.001	18.8166	5e-05	0.00104398	yes	TCONS_00037857	XLOC_020130	NA	chr3:96812286-96812372	86
TCONS_00037866	gcKO	WT	1065	0.001	19.0224	1e-04	0.00182757	yes	TCONS_00037866	XLOC_020139	NA	chr3:100353907-100353968	61
TCONS_00037871	gcKO	WT	812.583	0.001	18.6322	5e-05	0.00104398	yes	TCONS_00037871	XLOC_020144	NA	chr3:101410203-101410289	86
TCONS_00037874	gcKO	WT	780.133	0.001	18.5734	5e-05	0.00104398	yes	TCONS_00037874	XLOC_020147	NA	chr3:102472596-102472705	109
TCONS_00037875	gcKO	WT	1304.47	0.001	19.315	5e-05	0.00104398	yes	TCONS_00037875	XLOC_020148	NA	chr3:103635855-103635922	67
TCONS_00037877	gcKO	WT	1579.55	0.001	19.5911	5e-05	0.00104398	yes	TCONS_00037877	XLOC_020150	NA	chr3:104160747-104160812	65
TCONS_00037878	gcKO	WT	132.504	0.001	16.0157	5e-05	0.00104398	yes	TCONS_00037878	XLOC_020151	NA	chr3:104247546-104247694	148
TCONS_00037880	gcKO	WT	1181.49	0.001	19.1722	5e-05	0.00104398	yes	TCONS_00037880	XLOC_020153	NA	chr3:104327744-104327846	102
TCONS_00037884	gcKO	WT	300.744	0.001	17.1982	5e-05	0.00104398	yes	TCONS_00037884	XLOC_020157	NA	chr3:106963118-106963220	102
TCONS_00037886	gcKO	WT	0.001	29.1498	-13.8312	5e-05	0.00104398	yes	TCONS_00037886	XLOC_020159	NA	chr3:107359813-107360030	217
TCONS_00037887	gcKO	WT	226.433	0.001	16.7887	5e-05	0.00104398	yes	TCONS_00037887	XLOC_020160	NA	chr3:107506320-107506446	126
TCONS_00037888	gcKO	WT	155.687	0.001	16.2483	5e-05	0.00104398	yes	TCONS_00037888	XLOC_020161	NA	chr3:107590328-107590444	116
TCONS_00037891	gcKO	WT	493.385	0.001	17.9124	5e-05	0.00104398	yes	TCONS_00037891	XLOC_020164	NA	chr3:108055979-108056092	113
TCONS_00037894	gcKO	WT	799.179	0.001	18.6082	5e-05	0.00104398	yes	TCONS_00037894	XLOC_020167	NA	chr3:108882318-108882391	73
TCONS_00037896	gcKO	WT	1223.1	0.001	19.2221	5e-05	0.00104398	yes	TCONS_00037896	XLOC_020169	NA	chr3:109060274-109060342	68
TCONS_00037898	gcKO	WT	586.993	0.001	18.163	5e-05	0.00104398	yes	TCONS_00037898	XLOC_020171	NA	chr3:110170722-110170827	105
TCONS_00037899	gcKO	WT	1119.94	0.001	19.095	1e-04	0.00182757	yes	TCONS_00037899	XLOC_020172	NA	chr3:110911740-110911800	60
TCONS_00037900	gcKO	WT	1308.98	0.001	19.32	1e-04	0.00182757	yes	TCONS_00037900	XLOC_020173	NA	chr3:114877719-114877776	57
TCONS_00037904	gcKO	WT	1146.66	0.001	19.129	5e-05	0.00104398	yes	TCONS_00037904	XLOC_020177	NA	chr3:120516295-120516363	68
TCONS_00037908	gcKO	WT	3.13422	0.001	10.6144	0.0024	0.0329911	yes	TCONS_00037908	XLOC_020181	NA	chr3:120795330-120795654	324
TCONS_00037916	gcKO	WT	977.185	0.001	18.8983	5e-05	0.00104398	yes	TCONS_00037916	XLOC_020189	NA	chr3:122756547-122756623	76
TCONS_00037917	gcKO	WT	0.001	20.552	-13.3271	0.00395	0.0499734	yes	TCONS_00037917	XLOC_020190	NA	chr3:122760061-122760223	162
TCONS_00037922	gcKO	WT	0.001	73.7555	-15.1705	5e-05	0.00104398	yes	TCONS_00037922	XLOC_020195	NA	chr3:123464656-123464812	156
TCONS_00037925	gcKO	WT	489.997	0.001	17.9024	5e-05	0.00104398	yes	TCONS_00037925	XLOC_020198	NA	chr3:126177592-126177673	81
TCONS_00037927	gcKO	WT	2429.42	0.001	20.2122	5e-05	0.00104398	yes	TCONS_00037927	XLOC_020200	NA	chr3:126812343-126812391	48
TCONS_00037931	gcKO	WT	2351.87	0.001	20.1654	5e-05	0.00104398	yes	TCONS_00037931	XLOC_020204	NA	chr3:128195358-128195418	60
TCONS_00037932	gcKO	WT	1049.14	0.001	19.0008	5e-05	0.00104398	yes	TCONS_00037932	XLOC_020205	NA	chr3:128353164-128353234	70
TCONS_00037933	gcKO	WT	1620.56	0.001	19.6281	5e-05	0.00104398	yes	TCONS_00037933	XLOC_020206	NA	chr3:128662824-128662904	80
TCONS_00037942	gcKO	WT	432.797	0.001	17.7233	5e-05	0.00104398	yes	TCONS_00037942	XLOC_020215	NA	chr3:131498383-131498476	93
TCONS_00037946	gcKO	WT	1396.3	0.001	19.4132	5e-05	0.00104398	yes	TCONS_00037946	XLOC_020219	NA	chr3:133446312-133446391	79
TCONS_00037951	gcKO	WT	1803.26	0.001	19.7822	5e-05	0.00104398	yes	TCONS_00037951	XLOC_020224	NA	chr3:135484955-135485033	78
TCONS_00037953	gcKO	WT	1650.16	0.001	19.6542	5e-05	0.00104398	yes	TCONS_00037953	XLOC_020226	NA	chr3:135569776-135569835	59
TCONS_00037957	gcKO	WT	1679.91	0.001	19.68	5e-05	0.00104398	yes	TCONS_00037957	XLOC_020230	NA	chr3:137280068-137280128	60
TCONS_00037963	gcKO	WT	383.16	0.001	17.5476	1e-04	0.00182757	yes	TCONS_00037963	XLOC_020236	NA	chr3:141845756-141845841	85
TCONS_00037964	gcKO	WT	436.459	0.001	17.7355	5e-05	0.00104398	yes	TCONS_00037964	XLOC_020237	NA	chr3:142561528-142561641	113
TCONS_00037965	gcKO	WT	2484.14	0.001	20.2443	5e-05	0.00104398	yes	TCONS_00037965	XLOC_020238	NA	chr3:143289273-143289337	64
TCONS_00037968	gcKO	WT	993.77	0.001	18.9226	5e-05	0.00104398	yes	TCONS_00037968	XLOC_020241	NA	chr3:143722928-143722996	68
TCONS_00037970	gcKO	WT	732.631	0.001	18.4827	5e-05	0.00104398	yes	TCONS_00037970	XLOC_020243	NA	chr3:143770557-143770655	98
TCONS_00037976	gcKO	WT	1144.58	0.001	19.1264	5e-05	0.00104398	yes	TCONS_00037976	XLOC_020249	NA	chr3:146185929-146186029	100
TCONS_00037982	gcKO	WT	1308.98	0.001	19.32	1e-04	0.00182757	yes	TCONS_00037982	XLOC_020255	NA	chr3:147075884-147075941	57
TCONS_00037988	gcKO	WT	464	0.001	17.8238	5e-05	0.00104398	yes	TCONS_00037988	XLOC_020261	NA	chr3:149010995-149011093	98
TCONS_00037989	gcKO	WT	397.63	0.001	17.6011	1e-04	0.00182757	yes	TCONS_00037989	XLOC_020262	NA	chr3:149013170-149013254	84
TCONS_00037992	gcKO	WT	169.22	0.001	16.3685	5e-05	0.00104398	yes	TCONS_00037992	XLOC_020265	NA	chr3:149816033-149816152	119
TCONS_00037994	gcKO	WT	397.63	0.001	17.6011	1e-04	0.00182757	yes	TCONS_00037994	XLOC_020267	NA	chr3:150014158-150014242	84
TCONS_00037995	gcKO	WT	1150.25	0.001	19.1335	5e-05	0.00104398	yes	TCONS_00037995	XLOC_020268	NA	chr3:150014870-150014974	104
TCONS_00037996	gcKO	WT	0.001	206.874	-16.6584	0.00195	0.0275981	yes	TCONS_00037996	XLOC_020269	NA	chr3:152373426-152373517	91
TCONS_00037999	gcKO	WT	900.333	0.001	18.7801	5e-05	0.00104398	yes	TCONS_00037999	XLOC_020272	NA	chr3:153961926-153962008	82
TCONS_00038001	gcKO	WT	1744.05	0.001	19.734	5e-05	0.00104398	yes	TCONS_00038001	XLOC_020274	NA	chr3:154419188-154419257	69
TCONS_00038002	gcKO	WT	1862.36	0.001	19.8287	5e-05	0.00104398	yes	TCONS_00038002	XLOC_020275	NA	chr3:156052147-156052205	58
TCONS_00038139	gcKO	WT	56.2129	92.6966	-0.721605	0.0013	0.0196599	yes	TCONS_00038139	XLOC_020342	Ube2j1	chr4:33118399-33139339	3522
TCONS_00038181	gcKO	WT	29.2552	51.5422	-0.81704	0.00015	0.00268331	yes	TCONS_00038181	XLOC_020369	Dnaic1	chr4:41516814-41587335	2491
TCONS_00038241	gcKO	WT	2.02392	0.902286	1.16461	0.00365	0.0467589	yes	TCONS_00038241	XLOC_020398	5430416O09Rik	chr4:43742905-43747406	4086
TCONS_00038268	gcKO	WT	17.2225	7.88619	1.1268	0.00025	0.00433359	yes	TCONS_00038268	XLOC_020411	Grhpr	chr4:44994282-45003568	1226
TCONS_00038327	gcKO	WT	2.17019	7.04918	-1.69917	0.0029	0.0388424	yes	TCONS_00038327	XLOC_020438	Zfp189	chr4:49534034-49544465	2924
TCONS_00038355	gcKO	WT	23.4412	45.0254	-0.941663	0.0035	0.0452754	yes	TCONS_00038355	XLOC_020448	4930522O17Rik	chr4:53258918-53263996	452
TCONS_00038378	gcKO	WT	70.7131	23.3701	1.59727	3e-04	0.00513973	yes	TCONS_00038378	XLOC_020452	Tmem38b	chr4:53838916-53874890	2701
TCONS_00038390	gcKO	WT	170.969	267.442	-0.645488	0.00255	0.0347881	yes	TCONS_00038390	XLOC_020457	Actl7a	chr4:56756293-56757797	1504
TCONS_00038432	gcKO	WT	37.8958	66.7461	-0.816629	2e-04	0.00353476	yes	TCONS_00038432	XLOC_020471	Hsdl2	chr4:59594434-59631566	2616
TCONS_00038521	gcKO	WT	10.2649	6.10073	0.75057	0.00185	0.0265711	yes	TCONS_00038521	XLOC_020512	Sh3gl2	chr4:84851359-85035283	2806
TCONS_00038524	gcKO	WT	17.9541	45.3367	-1.33632	1e-04	0.00182757	yes	TCONS_00038524	XLOC_020514	NA	chr4:86204318-86210583	611
TCONS_00038566	gcKO	WT	4.77515	2.54579	0.907168	0.0034	0.0441689	yes	TCONS_00038566	XLOC_020545	Dmrta1	chr4:89354788-89361463	4073
TCONS_00038573	gcKO	WT	2281.2	0.001	20.1214	5e-05	0.00104398	yes	TCONS_00038573	XLOC_020551	NA	chr4:92613796-92801793	49
TCONS_00038680	gcKO	WT	6.18412	3.49973	0.821146	0.0017	0.0247116	yes	TCONS_00038680	XLOC_020589	1700024P16Rik	chr4:104586060-104689468	3136
TCONS_00038683	gcKO	WT	23.7044	12.8558	0.882684	1e-04	0.00182757	yes	TCONS_00038683	XLOC_020592	Dhcr24	chr4:106233642-106261720	4028
TCONS_00038686	gcKO	WT	3.04489	0.340662	3.15622	0.0013	0.0196599	yes	TCONS_00038686	XLOC_020594	Ttc22	chr4:106295053-106312792	2535
TCONS_00038750	gcKO	WT	3.60968	1.25699	1.52115	1e-04	0.00182757	yes	TCONS_00038750	XLOC_020619	Rab3b	chr4:108551674-108644682	3320
TCONS_00038775	gcKO	WT	162.21	284.876	-0.812467	0.00185	0.0265711	yes	TCONS_00038775	XLOC_020629	Spata6	chr4:111392614-111501918	2438
TCONS_00038954	gcKO	WT	1736.73	863.286	1.00846	5e-05	0.00104398	yes	TCONS_00038954	XLOC_020715	Pabpc4	chr4:122960153-122976076	218
TCONS_00038996	gcKO	WT	117.174	200.572	-0.775463	2e-04	0.00353476	yes	TCONS_00038996	XLOC_020738	Oscp1	chr4:125735808-125766578	2152
TCONS_00039046	gcKO	WT	18.4583	8.59952	1.10185	0.0014	0.0209805	yes	TCONS_00039046	XLOC_020761	Phc2	chr4:128331945-128430125	2302
TCONS_00039068	gcKO	WT	70.5311	36.859	0.936224	5e-05	0.00104398	yes	TCONS_00039068	XLOC_020774	Marcksl1	chr4:129190824-129193225	1601
TCONS_00039097	gcKO	WT	318.434	202.115	0.655815	0.00185	0.0265711	yes	TCONS_00039097	XLOC_020784	Fabp3	chr4:129986021-129992707	640
TCONS_00039117	gcKO	WT	4.12031	1.29274	1.67156	0.00035	0.00592226	yes	TCONS_00039117	XLOC_020790	Laptm5	chr4:130462793-130492063	2398
TCONS_00039125	gcKO	WT	3.38727	0.001	10.7263	5e-05	0.00104398	yes	TCONS_00039125	XLOC_020795	NA	chr4:131173906-131192130	472
TCONS_00039140	gcKO	WT	171.908	73.1005	1.23367	5e-05	0.00104398	yes	TCONS_00039140	XLOC_020801	Snhg12	chr4:131864592-131866939	1078
TCONS_00039189	gcKO	WT	115.835	189.459	-0.70981	0.0025	0.0342118	yes	TCONS_00039189	XLOC_020820	Ubxn11	chr4:133658497-133682701	1577
TCONS_00039270	gcKO	WT	22.9497	42.4917	-0.888677	0.00065	0.0105706	yes	TCONS_00039270	XLOC_020853	4930549C01Rik	chr4:136166351-136169128	670
TCONS_00039274	gcKO	WT	6.52172	3.25091	1.00419	5e-05	0.00104398	yes	TCONS_00039274	XLOC_020857	Hspg2	chr4:137024717-137126545	14177
TCONS_00039367	gcKO	WT	2.17005	1.01431	1.09647	0.00155	0.022832	yes	TCONS_00039367	XLOC_020887	Padi2	chr4:140462274-140513817	4758
TCONS_00039393	gcKO	WT	4.99454	2.75427	0.858447	0.0024	0.0329911	yes	TCONS_00039393	XLOC_020902	Casp9	chr4:141349526-141381918	3896
TCONS_00039505	gcKO	WT	5.39217	9.97026	-0.886642	0.00035	0.00592226	yes	TCONS_00039505	XLOC_020968	Errfi1	chr4:150229199-150242989	3018
TCONS_00039526	gcKO	WT	6.23346	2.86574	1.12085	5e-05	0.00104398	yes	TCONS_00039526	XLOC_020979	Gpr153	chr4:151648470-151659450	3777
[truncated: 1,141 more rows]
