# Supplementary material
Source: publisher figshare collection journal article supplement (https://plos.figshare.com/articles/dataset/_/1259769)
Supplement: Supplementary file 1 [file 1 › Table_S3.xlsx]

## Sheet: Sheet1
Table S3. A summary of genes with various splicing events (deletions/insertions at the gene body, the 3' UTR or the 5'UTR).
	Deletion in gene body	Insertion in gene body	Deletion at 3' UTR	Insertion at 3' UTR	Insertion at 5' UTR	Total
Splicing events	606	392	296	372	150	1816
Gene with splicing events	472	308	286	355	141	1562
