# Supplementary material
Source: publisher figshare collection journal article supplement (https://plos.figshare.com/articles/dataset/_/1259769)
Supplement: Supplementary file 1 [file 1 › Table_S4.xlsx]

## Sheet: Sheet1
Table S4. List of transcript isoforms unique to gcKO testes.
gene_id	tracking_id	refergroup	location	location_percentage	length	type
XLOC_000025	TCONS_00000069	TCONS_00000072	0	0	399	UTR3insertion
XLOC_000025	TCONS_00000069	TCONS_00000072	1633	1	25	UTR5insertion
XLOC_000025	TCONS_00000069	TCONS_00000072	928	0.568279	-89	internaldeletion
XLOC_000073	TCONS_00000154	TCONS_00000153	0	0	51	UTR3insertion
XLOC_000073	TCONS_00000154	TCONS_00000153	0	0	-105	UTR3deletion
XLOC_000089	TCONS_00000200	TCONS_00000195	3160	0.761262	2609	internalinsertion
XLOC_000089	TCONS_00000200	TCONS_00000195	3160	0.761262	-991	internaldeletion
XLOC_000091	TCONS_00000209	TCONS_00000210	0	0	91	UTR3insertion
XLOC_000091	TCONS_00000209	TCONS_00000210	0	0	-123	UTR3deletion
XLOC_000187	TCONS_00000416	TCONS_00000415	646	0.1119	18	internalinsertion
XLOC_000187	TCONS_00000416	TCONS_00000415	5773	1	95	UTR5insertion
XLOC_000190	TCONS_00000424	TCONS_00000422	0	0	4	UTR3insertion
XLOC_000190	TCONS_00000424	TCONS_00000422	472	0.600509	5	internalinsertion
XLOC_000190	TCONS_00000424	TCONS_00000422	0	0	-372	UTR3deletion
XLOC_000247	TCONS_00000559	TCONS_00000560	0	0	519	UTR3insertion
XLOC_000247	TCONS_00000559	TCONS_00000560	0	0	-307	UTR3deletion
XLOC_000247	TCONS_00000559	TCONS_00000560	711	0.247822	-312	internaldeletion
XLOC_000271	TCONS_00000631	TCONS_00000632	0	0	115	UTR3insertion
XLOC_000271	TCONS_00000631	TCONS_00000632	3137	1	828	UTR5insertion
XLOC_000271	TCONS_00000631	TCONS_00000632	1522	0.485177	-93	internaldeletion
XLOC_000283	TCONS_00000656	TCONS_00000661	0	0	1074	UTR3insertion
XLOC_000283	TCONS_00000656	TCONS_00000661	580	0.775401	471	internalinsertion
XLOC_000283	TCONS_00000656	TCONS_00000661	580	0.775401	-168	internaldeletion
XLOC_000307	TCONS_00000720	TCONS_00000724	983	0.319675	105	internalinsertion
XLOC_000307	TCONS_00000720	TCONS_00000724	1760	0.572358	-2	internaldeletion
XLOC_000313	TCONS_00000758	TCONS_00000751	0	0	21	UTR3insertion
XLOC_000313	TCONS_00000758	TCONS_00000751	3844	1	74	UTR5insertion
XLOC_000313	TCONS_00000758	TCONS_00000751	0	0	-1831	UTR3deletion
XLOC_000343	TCONS_00000829	TCONS_00000827	3552	1	1352	UTR5insertion
XLOC_000371	TCONS_00000899	TCONS_00000900	1968	0.565842	-1	internaldeletion
XLOC_000378	TCONS_00000915	TCONS_00000911	6661	1	134	UTR5insertion
XLOC_000378	TCONS_00000915	TCONS_00000911	1491	0.22384	-72	internaldeletion
XLOC_000471	TCONS_00001101	TCONS_00001109	0	0	113	UTR3insertion
XLOC_000471	TCONS_00001101	TCONS_00001109	1109	1	7	UTR5insertion
XLOC_000471	TCONS_00001101	TCONS_00001109	53	0.0477908	-5	internaldeletion
XLOC_000471	TCONS_00001101	TCONS_00001109	623	0.561767	-9	internaldeletion
XLOC_000472	TCONS_00001112	TCONS_00001111	0	0	-107	UTR3deletion
XLOC_000493	TCONS_00001150	TCONS_00001151	0	0	36	UTR3insertion
XLOC_000493	TCONS_00001150	TCONS_00001151	0	0	-23	UTR3deletion
XLOC_000506	TCONS_00001182	TCONS_00001180	3939	1	2589	UTR5insertion
XLOC_000522	TCONS_00001207	TCONS_00001206	261	0.622912	226	internalinsertion
XLOC_000522	TCONS_00001207	TCONS_00001206	0	0	-52	UTR3deletion
XLOC_000522	TCONS_00001207	TCONS_00001206	261	0.622912	-158	internaldeletion
XLOC_000602	TCONS_00001389	TCONS_00001390	410	0.225151	-31	internaldeletion
XLOC_000613	TCONS_00001406	TCONS_00001405	0	0	21	UTR3insertion
XLOC_000613	TCONS_00001406	TCONS_00001405	0	0	-951	UTR3deletion
XLOC_000618	TCONS_00001414	TCONS_00001415	0	0	184	UTR3insertion
XLOC_000618	TCONS_00001414	TCONS_00001415	1145	1	68	UTR5insertion
XLOC_000618	TCONS_00001414	TCONS_00001415	0	0	-91	UTR3deletion
XLOC_000675	TCONS_00001523	TCONS_00001522	0	0	45	UTR3insertion
XLOC_000675	TCONS_00001523	TCONS_00001522	0	0	-200	UTR3deletion
XLOC_000749	TCONS_00001693	TCONS_00001697	0	0	789	UTR3insertion
XLOC_000749	TCONS_00001693	TCONS_00001697	0	0	-83	UTR3deletion
XLOC_000749	TCONS_00001693	TCONS_00001697	506	0.645408	-219	internaldeletion
XLOC_000756	TCONS_00001709	TCONS_00001718	0	0	67	UTR3insertion
XLOC_000756	TCONS_00001709	TCONS_00001718	8010	0.975283	40	internalinsertion
XLOC_000756	TCONS_00001709	TCONS_00001718	8010	0.975283	-203	internaldeletion
XLOC_000784	TCONS_00001776	TCONS_00001774	2007	0.990622	252	internalinsertion
XLOC_000784	TCONS_00001776	TCONS_00001774	2007	0.990622	-19	internaldeletion
XLOC_000794	TCONS_00001796	TCONS_00001798	0	0	1290	UTR3insertion
XLOC_000794	TCONS_00001796	TCONS_00001798	2784	1	69	UTR5insertion
XLOC_000802	TCONS_00001817	TCONS_00001816	2236	0.975567	120	internalinsertion
XLOC_000802	TCONS_00001817	TCONS_00001816	2236	0.975567	-56	internaldeletion
XLOC_000857	TCONS_00001936	TCONS_00001938	0	0	941	UTR3insertion
XLOC_000857	TCONS_00001936	TCONS_00001938	1141	0.903405	15	internalinsertion
XLOC_000857	TCONS_00001936	TCONS_00001938	1263	1	22	UTR5insertion
XLOC_000857	TCONS_00001936	TCONS_00001938	701	0.555028	-105	internaldeletion
XLOC_000870	TCONS_00001961	TCONS_00001957	0	0	1483	UTR3insertion
XLOC_000870	TCONS_00001961	TCONS_00001957	1180	0.654102	71	internalinsertion
XLOC_000870	TCONS_00001961	TCONS_00001957	0	0	-400	UTR3deletion
XLOC_000927	TCONS_00002122	TCONS_00002121	7589	0.896727	130	internalinsertion
XLOC_000927	TCONS_00002122	TCONS_00002121	7589	0.896727	-874	internaldeletion
XLOC_000944	TCONS_00002164	TCONS_00002167	1854	0.220059	-75	internaldeletion
XLOC_000944	TCONS_00002164	TCONS_00002167	2742	0.32546	-270	internaldeletion
XLOC_000944	TCONS_00002164	TCONS_00002167	4107	0.487478	-273	internaldeletion
XLOC_000974	TCONS_00002236	TCONS_00002234	0	0	1391	UTR3insertion
XLOC_000974	TCONS_00002236	TCONS_00002234	0	0	-67	UTR3deletion
XLOC_001044	TCONS_00002384	TCONS_00002381	139	0.569672	6	internalinsertion
XLOC_001044	TCONS_00002384	TCONS_00002381	244	1	10	UTR5insertion
XLOC_001116	TCONS_00002530	TCONS_00002531	1703	0.938809	-6	internaldeletion
XLOC_001143	TCONS_00002603	TCONS_00002597	8101	1	405	UTR5insertion
XLOC_001143	TCONS_00002603	TCONS_00002597	6695	0.826441	-36	internaldeletion
XLOC_001149	TCONS_00002617	TCONS_00002619	0	0	2335	UTR3insertion
XLOC_001149	TCONS_00002617	TCONS_00002619	0	0	-161	UTR3deletion
XLOC_001196	TCONS_00002726	TCONS_00002725	0	0	32	UTR3insertion
XLOC_001196	TCONS_00002726	TCONS_00002725	0	0	-2417	UTR3deletion
XLOC_001213	TCONS_00002768	TCONS_00002769	1496	0.846633	-14	internaldeletion
XLOC_001213	TCONS_00002768	TCONS_00002769	1755	0.993209	-12	internaldeletion
XLOC_001222	TCONS_00002780	TCONS_00002781	0	0	46	UTR3insertion
XLOC_001222	TCONS_00002780	TCONS_00002781	7320	0.956738	25	internalinsertion
XLOC_001222	TCONS_00002780	TCONS_00002781	7320	0.956738	-331	internaldeletion
XLOC_001232	TCONS_00002804	TCONS_00002805	0	0	21	UTR3insertion
XLOC_001232	TCONS_00002804	TCONS_00002805	4193	0.989382	93	internalinsertion
XLOC_001232	TCONS_00002804	TCONS_00002805	4238	1	6	UTR5insertion
XLOC_001234	TCONS_00002822	TCONS_00002826	266	0.268687	253	internalinsertion
XLOC_001234	TCONS_00002822	TCONS_00002826	266	0.268687	-724	internaldeletion
XLOC_001268	TCONS_00002899	TCONS_00002901	3598	0.896363	7	internalinsertion
XLOC_001268	TCONS_00002899	TCONS_00002901	3598	0.896363	-416	internaldeletion
XLOC_001302	TCONS_00002978	TCONS_00002979	5828	0.780919	-3	internaldeletion
XLOC_001364	TCONS_00003088	TCONS_00003092	0	0	3570	UTR3insertion
XLOC_001364	TCONS_00003088	TCONS_00003092	513	0.357491	51	internalinsertion
XLOC_001364	TCONS_00003088	TCONS_00003092	0	0	-46	UTR3deletion
XLOC_001364	TCONS_00003088	TCONS_00003092	513	0.357491	-922	internaldeletion
XLOC_001393	TCONS_00003151	TCONS_00003154	2327	0.369541	-818	internaldeletion
XLOC_001393	TCONS_00003151	TCONS_00003154	5149	0.817691	-758	internaldeletion
XLOC_001393	TCONS_00003151	TCONS_00003154	5963	0.946959	-334	internaldeletion
XLOC_001420	TCONS_00003215	TCONS_00003213	0	0	-57	UTR3deletion
XLOC_001420	TCONS_00003215	TCONS_00003213	2668	0.630137	-120	internaldeletion
XLOC_001420	TCONS_00003215	TCONS_00003213	4207	0.993623	-27	internaldeletion
XLOC_002124	TCONS_00004088	TCONS_00004087	0	0	-201	UTR3deletion
XLOC_002124	TCONS_00004088	TCONS_00004087	3182	0.695215	-1395	internaldeletion
XLOC_002150	TCONS_00004129	TCONS_00004127	0	0	39	UTR3insertion
XLOC_002150	TCONS_00004129	TCONS_00004127	2182	1	64	UTR5insertion
XLOC_002150	TCONS_00004129	TCONS_00004127	0	0	-338	UTR3deletion
XLOC_002165	TCONS_00004165	TCONS_00004167	0	0	2	UTR3insertion
XLOC_002165	TCONS_00004165	TCONS_00004167	48	0.120301	280	internalinsertion
XLOC_002165	TCONS_00004165	TCONS_00004167	347	0.869674	-52	internaldeletion
XLOC_002207	TCONS_00004278	TCONS_00004280	0	0	15	UTR3insertion
XLOC_002207	TCONS_00004278	TCONS_00004280	657	0.0770584	-204	internaldeletion
XLOC_002370	TCONS_00004616	TCONS_00004612	0	0	3505	UTR3insertion
XLOC_002370	TCONS_00004616	TCONS_00004612	0	0	-1056	UTR3deletion
XLOC_002393	TCONS_00004674	TCONS_00004676	1737	0.397938	-8	internaldeletion
XLOC_002393	TCONS_00004674	TCONS_00004676	3546	0.812371	-3	internaldeletion
XLOC_002402	TCONS_00004702	TCONS_00004704	295	0.281489	-1	internaldeletion
XLOC_002402	TCONS_00004702	TCONS_00004704	469	0.447519	-3	internaldeletion
XLOC_002403	TCONS_00004706	TCONS_00004707	1135	0.217475	-38	internaldeletion
XLOC_002403	TCONS_00004709	TCONS_00004707	0	0	57	UTR3insertion
XLOC_002403	TCONS_00004709	TCONS_00004707	0	0	-72	UTR3deletion
XLOC_002424	TCONS_00004768	TCONS_00004767	0	0	33	UTR3insertion
XLOC_002424	TCONS_00004768	TCONS_00004767	0	0	-248	UTR3deletion
XLOC_002431	TCONS_00004781	TCONS_00004780	0	0	30	UTR3insertion
XLOC_002431	TCONS_00004781	TCONS_00004780	0	0	-464	UTR3deletion
XLOC_002483	TCONS_00004905	TCONS_00004904	67	0.0485507	36	internalinsertion
XLOC_002487	TCONS_00004917	TCONS_00004918	0	0	9	UTR3insertion
XLOC_002487	TCONS_00004917	TCONS_00004918	232	0.511013	-6	internaldeletion
XLOC_002499	TCONS_00004944	TCONS_00004941	0	0	176	UTR3insertion
XLOC_002499	TCONS_00004944	TCONS_00004941	1171	0.37448	30	internalinsertion
XLOC_002499	TCONS_00004944	TCONS_00004941	0	0	-181	UTR3deletion
XLOC_002499	TCONS_00004944	TCONS_00004941	673	0.215222	-135	internaldeletion
XLOC_002499	TCONS_00004944	TCONS_00004941	3126	0.99968	-1	internaldeletion
XLOC_002510	TCONS_00004975	TCONS_00004977	0	0	38	UTR3insertion
XLOC_002510	TCONS_00004975	TCONS_00004977	246	0.235632	2593	internalinsertion
XLOC_002510	TCONS_00004975	TCONS_00004977	246	0.235632	-798	internaldeletion
XLOC_002539	TCONS_00005040	TCONS_00005039	1176	0.302158	54	internalinsertion
XLOC_002539	TCONS_00005048	TCONS_00005039	1176	0.302158	54	internalinsertion
XLOC_002539	TCONS_00005048	TCONS_00005039	1588	0.408016	102	internalinsertion
XLOC_002539	TCONS_00005048	TCONS_00005039	0	0	-18	UTR3deletion
XLOC_002570	TCONS_00005113	TCONS_00005117	1395	0.812464	1929	internalinsertion
XLOC_002570	TCONS_00005113	TCONS_00005117	1395	0.812464	-322	internaldeletion
XLOC_002668	TCONS_00005327	TCONS_00005329	0	0	2222	UTR3insertion
XLOC_002668	TCONS_00005327	TCONS_00005329	1542	0.674836	93	internalinsertion
XLOC_002668	TCONS_00005327	TCONS_00005329	1667	0.72954	291	internalinsertion
XLOC_002668	TCONS_00005327	TCONS_00005329	0	0	-174	UTR3deletion
XLOC_002668	TCONS_00005327	TCONS_00005329	1667	0.72954	-618	internaldeletion
XLOC_002680	TCONS_00005346	TCONS_00005345	1313	0.644259	576	internalinsertion
XLOC_002680	TCONS_00005346	TCONS_00005345	1313	0.644259	-725	internaldeletion
XLOC_002687	TCONS_00005366	TCONS_00005368	940	0.872795	52	internalinsertion
XLOC_002687	TCONS_00005366	TCONS_00005368	940	0.872795	-137	internaldeletion
XLOC_002724	TCONS_00005432	TCONS_00005435	1393	0.941216	410	internalinsertion
XLOC_002724	TCONS_00005432	TCONS_00005435	1420	0.959459	-60	internaldeletion
XLOC_002726	TCONS_00005440	TCONS_00005441	0	0	7	UTR3insertion
XLOC_002726	TCONS_00005440	TCONS_00005441	3197	1	2	UTR5insertion
XLOC_002733	TCONS_00005453	TCONS_00005454	2148	0.948763	59	internalinsertion
XLOC_002733	TCONS_00005453	TCONS_00005454	1769	0.78136	-48	internaldeletion
XLOC_002733	TCONS_00005453	TCONS_00005454	2148	0.948763	-116	internaldeletion
XLOC_002743	TCONS_00005485	TCONS_00005484	712	0.728762	74	internalinsertion
XLOC_002743	TCONS_00005485	TCONS_00005484	712	0.728762	-265	internaldeletion
XLOC_002852	TCONS_00005721	TCONS_00005718	3013	0.827293	1871	internalinsertion
XLOC_002852	TCONS_00005721	TCONS_00005718	3013	0.827293	-629	internaldeletion
XLOC_002912	TCONS_00005849	TCONS_00005854	0	0	29	UTR3insertion
XLOC_002912	TCONS_00005849	TCONS_00005854	1110	0.334943	224	internalinsertion
XLOC_002912	TCONS_00005849	TCONS_00005854	1762	0.531684	3	internalinsertion
XLOC_002912	TCONS_00005849	TCONS_00005854	2421	0.730537	3	internalinsertion
XLOC_002912	TCONS_00005849	TCONS_00005854	1110	0.334943	-236	internaldeletion
XLOC_002939	TCONS_00005911	TCONS_00005912	0	0	1168	UTR3insertion
XLOC_002939	TCONS_00005911	TCONS_00005912	339	0.48777	74	internalinsertion
XLOC_002939	TCONS_00005911	TCONS_00005912	578	0.831655	723	internalinsertion
XLOC_002939	TCONS_00005911	TCONS_00005912	695	1	557	UTR5insertion
XLOC_002939	TCONS_00005911	TCONS_00005912	213	0.306475	-1	internaldeletion
XLOC_002973	TCONS_00005977	TCONS_00005978	2575	0.894097	209	internalinsertion
XLOC_002973	TCONS_00005977	TCONS_00005978	1225	0.425347	-673	internaldeletion
XLOC_002973	TCONS_00005977	TCONS_00005978	2777	0.964236	-103	internaldeletion
XLOC_003016	TCONS_00006070	TCONS_00006072	0	0	744	UTR3insertion
XLOC_003016	TCONS_00006070	TCONS_00006072	4135	1	240	UTR5insertion
XLOC_003016	TCONS_00006070	TCONS_00006072	3754	0.90786	-42	internaldeletion
XLOC_003051	TCONS_00006137	TCONS_00006144	0	0	1490	UTR3insertion
XLOC_003051	TCONS_00006137	TCONS_00006144	0	0	-252	UTR3deletion
XLOC_003051	TCONS_00006137	TCONS_00006144	524	0.965009	-19	internaldeletion
XLOC_003651	TCONS_00006906	TCONS_00006904	0	0	53	UTR3insertion
XLOC_003651	TCONS_00006906	TCONS_00006904	789	1	5	UTR5insertion
XLOC_003651	TCONS_00006906	TCONS_00006904	0	0	-198	UTR3deletion
XLOC_003659	TCONS_00006935	TCONS_00006933	260	0.157576	992	internalinsertion
XLOC_003659	TCONS_00006935	TCONS_00006933	260	0.157576	-1390	internaldeletion
XLOC_003754	TCONS_00007159	TCONS_00007158	0	0	68	UTR3insertion
XLOC_003754	TCONS_00007159	TCONS_00007158	0	0	-51	UTR3deletion
XLOC_003754	TCONS_00007159	TCONS_00007158	448	0.675716	-215	internaldeletion
XLOC_003809	TCONS_00007260	TCONS_00007261	2945	0.566564	-57	internaldeletion
XLOC_003822	TCONS_00007282	TCONS_00007284	0	0	68	UTR3insertion
XLOC_003822	TCONS_00007282	TCONS_00007284	1313	0.693975	208	internalinsertion
XLOC_003822	TCONS_00007282	TCONS_00007284	1313	0.693975	-579	internaldeletion
XLOC_003862	TCONS_00007393	TCONS_00007394	48	0.009942	36	internalinsertion
XLOC_003865	TCONS_00007399	TCONS_00007400	0	0	477	UTR3insertion
XLOC_003865	TCONS_00007399	TCONS_00007400	0	0	-20	UTR3deletion
XLOC_003867	TCONS_00007409	TCONS_00007408	0	0	91	UTR3insertion
XLOC_003867	TCONS_00007409	TCONS_00007408	0	0	-56	UTR3deletion
XLOC_003893	TCONS_00007450	TCONS_00007449	1680	1	1369	UTR5insertion
XLOC_003893	TCONS_00007451	TCONS_00007449	0	0	87	UTR3insertion
XLOC_003893	TCONS_00007451	TCONS_00007449	1680	1	1369	UTR5insertion
XLOC_003893	TCONS_00007451	TCONS_00007449	0	0	-89	UTR3deletion
XLOC_003895	TCONS_00007461	TCONS_00007460	780	1	224	UTR5insertion
XLOC_003895	TCONS_00007461	TCONS_00007460	143	0.183333	-283	internaldeletion
XLOC_003917	TCONS_00007505	TCONS_00007508	101	0.0650354	-5	internaldeletion
XLOC_003928	TCONS_00007524	TCONS_00007523	0	0	110	UTR3insertion
XLOC_003928	TCONS_00007524	TCONS_00007523	0	0	-117	UTR3deletion
XLOC_003984	TCONS_00007615	TCONS_00007619	0	0	666	UTR3insertion
XLOC_003984	TCONS_00007615	TCONS_00007619	0	0	-247	UTR3deletion
XLOC_003984	TCONS_00007615	TCONS_00007619	2118	0.988796	-24	internaldeletion
XLOC_003999	TCONS_00007643	TCONS_00007647	0	0	116	UTR3insertion
XLOC_003999	TCONS_00007643	TCONS_00007647	350	0.223785	648	internalinsertion
XLOC_003999	TCONS_00007643	TCONS_00007647	414	0.264706	1381	internalinsertion
XLOC_003999	TCONS_00007643	TCONS_00007647	1564	1	150	UTR5insertion
XLOC_004003	TCONS_00007658	TCONS_00007660	0	0	31	UTR3insertion
XLOC_004003	TCONS_00007658	TCONS_00007660	2935	1	21	UTR5insertion
XLOC_004003	TCONS_00007658	TCONS_00007660	617	0.210221	-1	internaldeletion
XLOC_004014	TCONS_00007680	TCONS_00007681	0	0	533	UTR3insertion
XLOC_004014	TCONS_00007680	TCONS_00007681	4	0.0164609	1	internalinsertion
XLOC_004021	TCONS_00007697	TCONS_00007696	2493	0.512752	24	internalinsertion
XLOC_004074	TCONS_00007797	TCONS_00007795	0	0	-1935	UTR3deletion
XLOC_004074	TCONS_00007797	TCONS_00007795	1995	0.858065	-330	internaldeletion
XLOC_004075	TCONS_00007801	TCONS_00007799	0	0	68	UTR3insertion
XLOC_004075	TCONS_00007801	TCONS_00007799	5799	1	2	UTR5insertion
XLOC_004075	TCONS_00007801	TCONS_00007799	0	0	-132	UTR3deletion
XLOC_004100	TCONS_00007849	TCONS_00007850	688	0.292144	-1	internaldeletion
XLOC_004107	TCONS_00007867	TCONS_00007865	7304	1	31	UTR5insertion
XLOC_004107	TCONS_00007867	TCONS_00007865	1138	0.155805	-107	internaldeletion
XLOC_004116	TCONS_00007882	TCONS_00007883	0	0	85	UTR3insertion
XLOC_004116	TCONS_00007882	TCONS_00007883	0	0	-38	UTR3deletion
XLOC_004121	TCONS_00007896	TCONS_00007895	0	0	192	UTR3insertion
XLOC_004121	TCONS_00007896	TCONS_00007895	0	0	-153	UTR3deletion
XLOC_004121	TCONS_00007896	TCONS_00007895	1663	0.955747	-77	internaldeletion
XLOC_004149	TCONS_00007954	TCONS_00007951	0	0	1168	UTR3insertion
XLOC_004149	TCONS_00007954	TCONS_00007951	601	0.26723	366	internalinsertion
XLOC_004149	TCONS_00007954	TCONS_00007951	0	0	-317	UTR3deletion
XLOC_004149	TCONS_00007954	TCONS_00007951	601	0.26723	-1648	internaldeletion
XLOC_004231	TCONS_00008138	TCONS_00008133	0	0	414	UTR3insertion
XLOC_004231	TCONS_00008138	TCONS_00008133	0	0	-602	UTR3deletion
XLOC_004231	TCONS_00008138	TCONS_00008133	651	0.109614	-53	internaldeletion
XLOC_004231	TCONS_00008138	TCONS_00008133	2527	0.425493	-192	internaldeletion
XLOC_004232	TCONS_00008144	TCONS_00008147	483	0.100604	1	internalinsertion
XLOC_004232	TCONS_00008144	TCONS_00008147	4090	0.851906	2565	internalinsertion
XLOC_004232	TCONS_00008144	TCONS_00008147	1350	0.281191	-12	internaldeletion
XLOC_004232	TCONS_00008144	TCONS_00008147	4795	0.99875	-6	internaldeletion
XLOC_004305	TCONS_00008276	TCONS_00008274	1519	1	32	UTR5insertion
XLOC_004305	TCONS_00008276	TCONS_00008274	135	0.0888743	-91	internaldeletion
XLOC_004305	TCONS_00008276	TCONS_00008274	580	0.38183	-219	internaldeletion
XLOC_004340	TCONS_00008333	TCONS_00008332	4006	1	2	UTR5insertion
XLOC_004340	TCONS_00008333	TCONS_00008332	113	0.0282077	-181	internaldeletion
XLOC_004344	TCONS_00008342	TCONS_00008343	115	0.0634308	-90	internaldeletion
XLOC_004382	TCONS_00008416	TCONS_00008414	1800	1	1516	UTR5insertion
XLOC_004382	TCONS_00008416	TCONS_00008414	0	0	-1753	UTR3deletion
XLOC_004388	TCONS_00008430	TCONS_00008429	3356	0.889242	99	internalinsertion
XLOC_004441	TCONS_00008546	TCONS_00008545	690	0.713547	5507	internalinsertion
XLOC_004441	TCONS_00008546	TCONS_00008545	690	0.713547	-277	internaldeletion
XLOC_004476	TCONS_00008614	TCONS_00008615	2249	0.758516	-716	internaldeletion
XLOC_004508	TCONS_00008683	TCONS_00008681	0	0	158	UTR3insertion
XLOC_004508	TCONS_00008683	TCONS_00008681	0	0	-989	UTR3deletion
XLOC_004510	TCONS_00008689	TCONS_00008685	0	0	22	UTR3insertion
XLOC_004510	TCONS_00008689	TCONS_00008685	4518	0.970778	4184	internalinsertion
XLOC_004510	TCONS_00008689	TCONS_00008685	0	0	-398	UTR3deletion
XLOC_004510	TCONS_00008689	TCONS_00008685	4518	0.970778	-136	internaldeletion
XLOC_004583	TCONS_00008825	TCONS_00008824	2393	0.845583	19	internalinsertion
XLOC_004583	TCONS_00008825	TCONS_00008824	2830	1	393	UTR5insertion
XLOC_004595	TCONS_00008865	TCONS_00008860	2251	0.399893	111	internalinsertion
XLOC_004595	TCONS_00008865	TCONS_00008860	5551	0.986143	293	internalinsertion
XLOC_004595	TCONS_00008865	TCONS_00008860	5551	0.986143	-78	internaldeletion
XLOC_004602	TCONS_00008892	TCONS_00008891	2400	1	1195	UTR5insertion
XLOC_004806	TCONS_00009322	TCONS_00009323	0	0	4	UTR3insertion
XLOC_004806	TCONS_00009322	TCONS_00009323	1758	1	95	UTR5insertion
XLOC_004806	TCONS_00009322	TCONS_00009323	448	0.254835	-61	internaldeletion
XLOC_004866	TCONS_00009472	TCONS_00009473	0	0	700	UTR3insertion
XLOC_004866	TCONS_00009472	TCONS_00009473	3740	1	10	UTR5insertion
XLOC_004866	TCONS_00009472	TCONS_00009473	1455	0.389037	-4	internaldeletion
XLOC_004874	TCONS_00009492	TCONS_00009491	2766	0.919548	69	internalinsertion
XLOC_004874	TCONS_00009492	TCONS_00009491	3004	0.99867	42	internalinsertion
XLOC_004874	TCONS_00009492	TCONS_00009491	3004	0.99867	-4	internaldeletion
XLOC_004876	TCONS_00009503	TCONS_00009506	4124	0.971496	35	internalinsertion
XLOC_004876	TCONS_00009503	TCONS_00009506	3213	0.75689	-36	internaldeletion
XLOC_004880	TCONS_00009516	TCONS_00009518	3556	0.924116	-6	internaldeletion
XLOC_004880	TCONS_00009517	TCONS_00009518	2815	0.731549	-6	internaldeletion
XLOC_004880	TCONS_00009517	TCONS_00009518	3556	0.924116	-6	internaldeletion
XLOC_004882	TCONS_00009521	TCONS_00009520	4017	0.453796	3	internalinsertion
XLOC_004882	TCONS_00009521	TCONS_00009520	6727	0.759941	18	internalinsertion
XLOC_004882	TCONS_00009521	TCONS_00009520	4935	0.557501	-42	internaldeletion
XLOC_004882	TCONS_00009521	TCONS_00009520	5346	0.603931	-12	internaldeletion
XLOC_004882	TCONS_00009521	TCONS_00009520	6432	0.726615	-168	internaldeletion
XLOC_004894	TCONS_00009552	TCONS_00009553	1412	0.346588	-52	internaldeletion
XLOC_004952	TCONS_00009682	TCONS_00009686	0	0	679	UTR3insertion
XLOC_004952	TCONS_00009682	TCONS_00009686	0	0	-622	UTR3deletion
XLOC_004964	TCONS_00009716	TCONS_00009718	982	0.909259	109	internalinsertion
XLOC_005010	TCONS_00009804	TCONS_00009803	4260	0.839905	-226	internaldeletion
XLOC_005014	TCONS_00009815	TCONS_00009816	2646	0.869537	63	internalinsertion
XLOC_005045	TCONS_00009871	TCONS_00009872	2241	0.361393	209	internalinsertion
XLOC_005045	TCONS_00009871	TCONS_00009872	2241	0.361393	-3960	internaldeletion
XLOC_005062	TCONS_00009907	TCONS_00009905	0	0	58	UTR3insertion
XLOC_005062	TCONS_00009907	TCONS_00009905	357	1	110	UTR5insertion
XLOC_005062	TCONS_00009907	TCONS_00009905	0	0	-176	UTR3deletion
XLOC_005076	TCONS_00009934	TCONS_00009935	0	0	74	UTR3insertion
XLOC_005076	TCONS_00009934	TCONS_00009935	2606	0.740551	84	internalinsertion
XLOC_005076	TCONS_00009934	TCONS_00009935	3017	0.857346	3	internalinsertion
XLOC_005076	TCONS_00009934	TCONS_00009935	3205	0.91077	203	internalinsertion
XLOC_005076	TCONS_00009934	TCONS_00009935	3205	0.91077	-314	internaldeletion
XLOC_005131	TCONS_00010045	TCONS_00010042	255	0.337748	1615	internalinsertion
XLOC_005131	TCONS_00010045	TCONS_00010042	0	0	-100	UTR3deletion
XLOC_005132	TCONS_00010051	TCONS_00010048	0	0	43	UTR3insertion
XLOC_005132	TCONS_00010051	TCONS_00010048	6490	1	224	UTR5insertion
XLOC_005132	TCONS_00010051	TCONS_00010048	0	0	-5946	UTR3deletion
XLOC_005175	TCONS_00010138	TCONS_00010139	0	0	1	UTR3insertion
XLOC_005175	TCONS_00010138	TCONS_00010139	1978	1	223	UTR5insertion
XLOC_005175	TCONS_00010138	TCONS_00010139	0	0	-122	UTR3deletion
XLOC_005194	TCONS_00010177	TCONS_00010174	3781	0.99317	376	internalinsertion
XLOC_005194	TCONS_00010177	TCONS_00010174	0	0	-17	UTR3deletion
XLOC_005194	TCONS_00010177	TCONS_00010174	3781	0.99317	-26	internaldeletion
XLOC_005206	TCONS_00010200	TCONS_00010203	0	0	74	UTR3insertion
XLOC_005206	TCONS_00010200	TCONS_00010203	0	0	-13	UTR3deletion
XLOC_005344	TCONS_00010426	TCONS_00010427	396	0.0489372	-7234	internaldeletion
XLOC_005344	TCONS_00010426	TCONS_00010427	7682	0.949333	-410	internaldeletion
XLOC_005366	TCONS_00010477	TCONS_00010478	0	0	502	UTR3insertion
XLOC_005366	TCONS_00010477	TCONS_00010478	3976	1	24	UTR5insertion
XLOC_005366	TCONS_00010477	TCONS_00010478	0	0	-1135	UTR3deletion
XLOC_005373	TCONS_00010497	TCONS_00010500	0	0	62	UTR3insertion
XLOC_005373	TCONS_00010497	TCONS_00010500	3121	0.271675	-103	internaldeletion
XLOC_005444	TCONS_00010656	TCONS_00010651	4895	1	186	UTR5insertion
XLOC_005444	TCONS_00010656	TCONS_00010651	4794	0.979367	-52	internaldeletion
XLOC_005445	TCONS_00010659	TCONS_00010661	3930	0.999746	62	internalinsertion
XLOC_005445	TCONS_00010659	TCONS_00010661	3930	0.999746	-1	internaldeletion
XLOC_005466	TCONS_00010720	TCONS_00010717	0	0	1682	UTR3insertion
XLOC_005466	TCONS_00010720	TCONS_00010717	1584	0.118271	21	internalinsertion
XLOC_005466	TCONS_00010720	TCONS_00010717	2655	0.198238	2	internalinsertion
XLOC_005466	TCONS_00010720	TCONS_00010717	0	0	-155	UTR3deletion
XLOC_005466	TCONS_00010720	TCONS_00010717	8065	0.60218	-6	internaldeletion
XLOC_005466	TCONS_00010720	TCONS_00010717	8284	0.618532	-21	internaldeletion
XLOC_005466	TCONS_00010720	TCONS_00010717	13366	0.997984	-27	internaldeletion
XLOC_005480	TCONS_00010762	TCONS_00010763	3459	0.799954	-94	internaldeletion
XLOC_005987	TCONS_00011363	TCONS_00011367	0	0	20	UTR3insertion
XLOC_005987	TCONS_00011363	TCONS_00011367	786	0.297052	83	internalinsertion
XLOC_005989	TCONS_00011371	TCONS_00011380	0	0	37	UTR3insertion
XLOC_005989	TCONS_00011371	TCONS_00011380	1873	0.313525	237	internalinsertion
XLOC_005989	TCONS_00011371	TCONS_00011380	0	0	-10	UTR3deletion
XLOC_005989	TCONS_00011371	TCONS_00011380	79	0.013224	-125	internaldeletion
XLOC_006079	TCONS_00011536	TCONS_00011538	582	0.182789	-284	internaldeletion
XLOC_006112	TCONS_00011603	TCONS_00011602	0	0	148	UTR3insertion
XLOC_006112	TCONS_00011603	TCONS_00011602	0	0	-96	UTR3deletion
XLOC_006112	TCONS_00011603	TCONS_00011602	243	0.199017	-38	internaldeletion
XLOC_006169	TCONS_00011731	TCONS_00011737	0	0	7400	UTR3insertion
XLOC_006169	TCONS_00011731	TCONS_00011737	0	0	-73	UTR3deletion
XLOC_006169	TCONS_00011731	TCONS_00011737	6123	0.426007	-3	internaldeletion
XLOC_006169	TCONS_00011733	TCONS_00011737	0	0	7400	UTR3insertion
XLOC_006169	TCONS_00011733	TCONS_00011737	13222	0.919919	25	internalinsertion
XLOC_006169	TCONS_00011733	TCONS_00011737	0	0	-73	UTR3deletion
XLOC_006169	TCONS_00011733	TCONS_00011737	13222	0.919919	-7	internaldeletion
XLOC_006189	TCONS_00011795	TCONS_00011793	0	0	385	UTR3insertion
XLOC_006189	TCONS_00011795	TCONS_00011793	0	0	-226	UTR3deletion
XLOC_006189	TCONS_00011798	TCONS_00011793	0	0	146	UTR3insertion
XLOC_006189	TCONS_00011798	TCONS_00011793	0	0	-506	UTR3deletion
XLOC_006202	TCONS_00011835	TCONS_00011841	0	0	127	UTR3insertion
XLOC_006202	TCONS_00011835	TCONS_00011841	5606	0.748465	13	internalinsertion
XLOC_006205	TCONS_00011847	TCONS_00011846	2085	1	31	UTR5insertion
XLOC_006205	TCONS_00011847	TCONS_00011846	694	0.332854	-4	internaldeletion
XLOC_006256	TCONS_00011954	TCONS_00011956	0	0	1	UTR3insertion
XLOC_006256	TCONS_00011954	TCONS_00011956	138	0.0827834	-1	internaldeletion
XLOC_006256	TCONS_00011954	TCONS_00011956	190	0.113977	-68	internaldeletion
XLOC_006269	TCONS_00011977	TCONS_00011981	0	0	471	UTR3insertion
XLOC_006269	TCONS_00011977	TCONS_00011981	0	0	-1839	UTR3deletion
XLOC_006273	TCONS_00011996	TCONS_00011994	343	0.684631	125	internalinsertion
XLOC_006273	TCONS_00011996	TCONS_00011994	0	0	-7	UTR3deletion
XLOC_006273	TCONS_00011996	TCONS_00011994	343	0.684631	-158	internaldeletion
XLOC_006283	TCONS_00012023	TCONS_00012025	303	0.0989873	14	internalinsertion
XLOC_006291	TCONS_00012039	TCONS_00012048	0	0	38	UTR3insertion
XLOC_006291	TCONS_00012039	TCONS_00012048	3716	1	96	UTR5insertion
XLOC_006291	TCONS_00012039	TCONS_00012048	0	0	-545	UTR3deletion
XLOC_006291	TCONS_00012047	TCONS_00012048	0	0	97	UTR3insertion
XLOC_006291	TCONS_00012047	TCONS_00012048	3716	1	96	UTR5insertion
XLOC_006291	TCONS_00012047	TCONS_00012048	1406	0.378364	-145	internaldeletion
XLOC_006345	TCONS_00012178	TCONS_00012175	0	0	94	UTR3insertion
XLOC_006345	TCONS_00012178	TCONS_00012175	0	0	-1800	UTR3deletion
XLOC_006414	TCONS_00012274	TCONS_00012275	1299	0.96151	3922	internalinsertion
XLOC_006414	TCONS_00012274	TCONS_00012275	1299	0.96151	-52	internaldeletion
XLOC_006496	TCONS_00012438	TCONS_00012440	439	0.632565	90	internalinsertion
XLOC_006496	TCONS_00012438	TCONS_00012440	658	0.948127	123	internalinsertion
XLOC_006496	TCONS_00012438	TCONS_00012440	658	0.948127	-36	internaldeletion
XLOC_006496	TCONS_00012441	TCONS_00012440	694	1	5	UTR5insertion
XLOC_006496	TCONS_00012441	TCONS_00012440	256	0.368876	-71	internaldeletion
XLOC_006496	TCONS_00012441	TCONS_00012440	439	0.632565	-91	internaldeletion
XLOC_006496	TCONS_00012442	TCONS_00012440	439	0.632565	187	internalinsertion
XLOC_006496	TCONS_00012442	TCONS_00012440	530	0.763689	90	internalinsertion
XLOC_006496	TCONS_00012442	TCONS_00012440	0	0	-1	UTR3deletion
XLOC_006496	TCONS_00012442	TCONS_00012440	530	0.763689	-164	internaldeletion
XLOC_006521	TCONS_00012511	TCONS_00012514	0	0	677	UTR3insertion
XLOC_006521	TCONS_00012511	TCONS_00012514	2231	1	43	UTR5insertion
XLOC_006521	TCONS_00012511	TCONS_00012514	0	0	-1149	UTR3deletion
XLOC_006521	TCONS_00012511	TCONS_00012514	1753	0.785746	-77	internaldeletion
XLOC_006521	TCONS_00012515	TCONS_00012514	0	0	57	UTR3insertion
XLOC_006521	TCONS_00012515	TCONS_00012514	1882	0.843568	101	internalinsertion
XLOC_006521	TCONS_00012515	TCONS_00012514	0	0	-1149	UTR3deletion
XLOC_006521	TCONS_00012515	TCONS_00012514	1753	0.785746	-77	internaldeletion
XLOC_006521	TCONS_00012515	TCONS_00012514	1882	0.843568	-349	internaldeletion
XLOC_006530	TCONS_00012530	TCONS_00012531	2796	0.899903	114	internalinsertion
XLOC_006530	TCONS_00012530	TCONS_00012531	2984	0.960412	37	internalinsertion
XLOC_006530	TCONS_00012530	TCONS_00012531	2796	0.899903	-114	internaldeletion
XLOC_006530	TCONS_00012530	TCONS_00012531	2984	0.960412	-123	internaldeletion
XLOC_006574	TCONS_00012638	TCONS_00012641	0	0	74	UTR3insertion
XLOC_006574	TCONS_00012638	TCONS_00012641	3517	0.3913	-6	internaldeletion
XLOC_006574	TCONS_00012638	TCONS_00012641	4569	0.508344	-141	internaldeletion
XLOC_006604	TCONS_00012700	TCONS_00012703	345	0.151849	1064	internalinsertion
XLOC_006604	TCONS_00012700	TCONS_00012703	2093	0.921215	29	internalinsertion
XLOC_006604	TCONS_00012700	TCONS_00012703	2093	0.921215	-179	internaldeletion
XLOC_006618	TCONS_00012726	TCONS_00012727	4290	0.764433	3	internalinsertion
XLOC_006618	TCONS_00012726	TCONS_00012727	1982	0.353172	-42	internaldeletion
XLOC_006691	TCONS_00012880	TCONS_00012878	2121	0.627144	-147	internaldeletion
XLOC_006719	TCONS_00012946	TCONS_00012942	0	0	2552	UTR3insertion
XLOC_006719	TCONS_00012946	TCONS_00012942	0	0	-1412	UTR3deletion
XLOC_006742	TCONS_00012987	TCONS_00012988	0	0	181	UTR3insertion
XLOC_006742	TCONS_00012987	TCONS_00012988	3501	0.945194	131	internalinsertion
XLOC_006742	TCONS_00012987	TCONS_00012988	3501	0.945194	-203	internaldeletion
XLOC_006814	TCONS_00013152	TCONS_00013150	0	0	251	UTR3insertion
XLOC_006814	TCONS_00013152	TCONS_00013150	0	0	-122	UTR3deletion
XLOC_006814	TCONS_00013152	TCONS_00013150	811	0.850105	-36	internaldeletion
XLOC_006836	TCONS_00013205	TCONS_00013207	0	0	38	UTR3insertion
XLOC_006836	TCONS_00013205	TCONS_00013207	508	0.640605	-48	internaldeletion
XLOC_007453	TCONS_00014005	TCONS_00014001	507	0.258806	1828	internalinsertion
XLOC_007453	TCONS_00014005	TCONS_00014001	0	0	-207	UTR3deletion
XLOC_007505	TCONS_00014105	TCONS_00014103	335	0.247781	-39	internaldeletion
XLOC_007563	TCONS_00014203	TCONS_00014202	0	0	-18	UTR3deletion
XLOC_007563	TCONS_00014203	TCONS_00014202	121	0.145433	-166	internaldeletion
XLOC_007642	TCONS_00014363	TCONS_00014362	960	0.304086	-81	internaldeletion
XLOC_007701	TCONS_00014488	TCONS_00014489	87	0.0460561	-122	internaldeletion
XLOC_007701	TCONS_00014488	TCONS_00014489	537	0.284277	-96	internaldeletion
XLOC_007705	TCONS_00014498	TCONS_00014495	67	0.0710498	48	internalinsertion
XLOC_007705	TCONS_00014498	TCONS_00014495	0	0	-12	UTR3deletion
XLOC_007705	TCONS_00014498	TCONS_00014495	67	0.0710498	-147	internaldeletion
XLOC_007853	TCONS_00014759	TCONS_00014760	4198	0.987765	25	internalinsertion
XLOC_007853	TCONS_00014759	TCONS_00014760	4198	0.987765	-52	internaldeletion
XLOC_007877	TCONS_00014817	TCONS_00014818	2592	0.947368	70	internalinsertion
XLOC_007877	TCONS_00014817	TCONS_00014818	2592	0.947368	-144	internaldeletion
XLOC_007915	TCONS_00014910	TCONS_00014911	0	0	103	UTR3insertion
XLOC_007915	TCONS_00014910	TCONS_00014911	0	0	-89	UTR3deletion
XLOC_007936	TCONS_00014952	TCONS_00014954	4213	0.993164	23	internalinsertion
XLOC_007936	TCONS_00014952	TCONS_00014954	4213	0.993164	-29	internaldeletion
XLOC_007958	TCONS_00014987	TCONS_00014995	0	0	54	UTR3insertion
XLOC_007958	TCONS_00014987	TCONS_00014995	3475	0.881756	3	internalinsertion
XLOC_007971	TCONS_00015026	TCONS_00015028	1666	0.636364	31	internalinsertion
XLOC_007971	TCONS_00015026	TCONS_00015028	1666	0.636364	-952	internaldeletion
XLOC_007977	TCONS_00015048	TCONS_00015047	1036	0.528841	91	internalinsertion
XLOC_007977	TCONS_00015048	TCONS_00015047	1244	0.635018	3	internalinsertion
XLOC_007977	TCONS_00015048	TCONS_00015047	1036	0.528841	-100	internaldeletion
XLOC_007977	TCONS_00015049	TCONS_00015047	1036	0.528841	91	internalinsertion
XLOC_007977	TCONS_00015049	TCONS_00015047	1036	0.528841	-100	internaldeletion
XLOC_008077	TCONS_00015237	TCONS_00015240	3635	0.918161	-182	internaldeletion
XLOC_008077	TCONS_00015237	TCONS_00015240	3886	0.981561	-73	internaldeletion
XLOC_008077	TCONS_00015238	TCONS_00015240	2825	0.713564	-373	internaldeletion
XLOC_008077	TCONS_00015238	TCONS_00015240	3635	0.918161	-182	internaldeletion
XLOC_008077	TCONS_00015238	TCONS_00015240	3886	0.981561	-73	internaldeletion
XLOC_008105	TCONS_00015291	TCONS_00015288	1492	0.979003	73	internalinsertion
XLOC_008105	TCONS_00015291	TCONS_00015288	1492	0.979003	-32	internaldeletion
XLOC_008112	TCONS_00015304	TCONS_00015306	3484	0.705692	41	internalinsertion
XLOC_008112	TCONS_00015304	TCONS_00015306	3484	0.705692	-1453	internaldeletion
XLOC_008117	TCONS_00015319	TCONS_00015318	3742	1	137	UTR5insertion
XLOC_008117	TCONS_00015319	TCONS_00015318	3436	0.918226	-76	internaldeletion
XLOC_008123	TCONS_00015330	TCONS_00015329	0	0	179	UTR3insertion
XLOC_008123	TCONS_00015330	TCONS_00015329	388	1	11	UTR5insertion
XLOC_008123	TCONS_00015330	TCONS_00015329	0	0	-342	UTR3deletion
XLOC_008193	TCONS_00015475	TCONS_00015476	516	0.72067	-6	internaldeletion
XLOC_008207	TCONS_00015513	TCONS_00015515	2241	0.631445	-3	internaldeletion
XLOC_008207	TCONS_00015514	TCONS_00015515	2678	0.754579	-18	internaldeletion
XLOC_008702	TCONS_00016106	TCONS_00016104	896	0.368724	107	internalinsertion
XLOC_008702	TCONS_00016106	TCONS_00016104	2430	1	1	UTR5insertion
XLOC_008702	TCONS_00016106	TCONS_00016104	896	0.368724	-188	internaldeletion
XLOC_008704	TCONS_00016108	TCONS_00016110	1089	0.244939	69	internalinsertion
XLOC_008704	TCONS_00016108	TCONS_00016110	1705	0.383491	1	internalinsertion
XLOC_008704	TCONS_00016108	TCONS_00016110	501	0.112686	-297	internaldeletion
XLOC_008704	TCONS_00016108	TCONS_00016110	1705	0.383491	-2741	internaldeletion
XLOC_008751	TCONS_00016245	TCONS_00016244	0	0	59	UTR3insertion
XLOC_008751	TCONS_00016245	TCONS_00016244	0	0	-1698	UTR3deletion
XLOC_008751	TCONS_00016245	TCONS_00016244	1699	0.529779	-1508	internaldeletion
XLOC_008825	TCONS_00016404	TCONS_00016406	157	0.0513912	389	internalinsertion
XLOC_008825	TCONS_00016404	TCONS_00016406	157	0.0513912	-2898	internaldeletion
XLOC_008900	TCONS_00016540	TCONS_00016541	679	0.487787	266	internalinsertion
XLOC_008900	TCONS_00016540	TCONS_00016541	679	0.487787	-713	internaldeletion
XLOC_008908	TCONS_00016558	TCONS_00016559	0	0	259	UTR3insertion
XLOC_008908	TCONS_00016558	TCONS_00016559	0	0	-143	UTR3deletion
XLOC_008911	TCONS_00016567	TCONS_00016566	0	0	230	UTR3insertion
XLOC_008911	TCONS_00016567	TCONS_00016566	1544	1	251	UTR5insertion
XLOC_008911	TCONS_00016567	TCONS_00016566	0	0	-150	UTR3deletion
XLOC_008940	TCONS_00016613	TCONS_00016615	144	0.280156	96	internalinsertion
XLOC_008973	TCONS_00016684	TCONS_00016687	4592	0.503454	39	internalinsertion
XLOC_008973	TCONS_00016684	TCONS_00016687	5349	0.586449	202	internalinsertion
XLOC_008973	TCONS_00016684	TCONS_00016687	4592	0.503454	-51	internaldeletion
XLOC_008973	TCONS_00016684	TCONS_00016687	5349	0.586449	-3772	internaldeletion
XLOC_008992	TCONS_00016726	TCONS_00016724	0	0	355	UTR3insertion
XLOC_008992	TCONS_00016726	TCONS_00016724	0	0	-234	UTR3deletion
XLOC_009019	TCONS_00016781	TCONS_00016779	0	0	193	UTR3insertion
XLOC_009019	TCONS_00016781	TCONS_00016779	0	0	-79	UTR3deletion
XLOC_009094	TCONS_00016944	TCONS_00016938	0	0	87	UTR3insertion
XLOC_009094	TCONS_00016944	TCONS_00016938	0	0	-482	UTR3deletion
XLOC_009108	TCONS_00016977	TCONS_00016976	299	0.734644	74	internalinsertion
XLOC_009108	TCONS_00016977	TCONS_00016976	0	0	-49	UTR3deletion
XLOC_009108	TCONS_00016977	TCONS_00016976	172	0.422604	-21	internaldeletion
XLOC_009108	TCONS_00016977	TCONS_00016976	299	0.734644	-108	internaldeletion
XLOC_009134	TCONS_00017031	TCONS_00017032	0	0	667	UTR3insertion
XLOC_009134	TCONS_00017031	TCONS_00017032	0	0	-1541	UTR3deletion
XLOC_009171	TCONS_00017120	TCONS_00017119	612	0.343049	3	internalinsertion
XLOC_009171	TCONS_00017120	TCONS_00017119	1713	0.960202	328	internalinsertion
XLOC_009171	TCONS_00017120	TCONS_00017119	1713	0.960202	-71	internaldeletion
XLOC_009217	TCONS_00017259	TCONS_00017257	0	0	478	UTR3insertion
XLOC_009217	TCONS_00017259	TCONS_00017257	0	0	-2257	UTR3deletion
XLOC_009258	TCONS_00017342	TCONS_00017344	5217	0.934611	-67	internaldeletion
XLOC_009414	TCONS_00017621	TCONS_00017624	0	0	2103	UTR3insertion
XLOC_009414	TCONS_00017621	TCONS_00017624	0	0	-2375	UTR3deletion
XLOC_009433	TCONS_00017665	TCONS_00017664	2174	0.728064	48	internalinsertion
XLOC_009497	TCONS_00017821	TCONS_00017824	0	0	4520	UTR3insertion
XLOC_009497	TCONS_00017821	TCONS_00017824	0	0	-31	UTR3deletion
XLOC_009497	TCONS_00017821	TCONS_00017824	233	0.62973	-11	internaldeletion
XLOC_009499	TCONS_00017832	TCONS_00017829	2159	0.833269	171	internalinsertion
XLOC_009499	TCONS_00017832	TCONS_00017829	976	0.376689	-207	internaldeletion
XLOC_009499	TCONS_00017832	TCONS_00017829	1402	0.541104	-140	internaldeletion
XLOC_009499	TCONS_00017832	TCONS_00017829	2159	0.833269	-432	internaldeletion
XLOC_009994	TCONS_00018523	TCONS_00018526	0	0	66	UTR3insertion
XLOC_009994	TCONS_00018523	TCONS_00018526	5230	1	738	UTR5insertion
XLOC_009994	TCONS_00018523	TCONS_00018526	0	0	-152	UTR3deletion
XLOC_010052	TCONS_00018652	TCONS_00018653	0	0	30	UTR3insertion
XLOC_010052	TCONS_00018652	TCONS_00018653	3680	1	738	UTR5insertion
XLOC_010172	TCONS_00018924	TCONS_00018925	253	0.0937037	-5	internaldeletion
XLOC_010222	TCONS_00019010	TCONS_00019011	0	0	20	UTR3insertion
XLOC_010222	TCONS_00019010	TCONS_00019011	0	0	-137	UTR3deletion
XLOC_010222	TCONS_00019010	TCONS_00019011	198	0.0974889	-1833	internaldeletion
XLOC_010284	TCONS_00019145	TCONS_00019143	0	0	35	UTR3insertion
XLOC_010284	TCONS_00019145	TCONS_00019143	0	0	-1314	UTR3deletion
XLOC_010319	TCONS_00019223	TCONS_00019222	0	0	37	UTR3insertion
XLOC_010319	TCONS_00019223	TCONS_00019222	273	0.076492	57	internalinsertion
XLOC_010319	TCONS_00019223	TCONS_00019222	0	0	-61	UTR3deletion
XLOC_010331	TCONS_00019248	TCONS_00019249	420	0.166271	-1	internaldeletion
XLOC_010332	TCONS_00019252	TCONS_00019250	1467	1	66	UTR5insertion
XLOC_010332	TCONS_00019252	TCONS_00019250	96	0.0654397	-11	internaldeletion
XLOC_010334	TCONS_00019257	TCONS_00019255	0	0	94	UTR3insertion
XLOC_010334	TCONS_00019257	TCONS_00019255	0	0	-297	UTR3deletion
XLOC_010334	TCONS_00019257	TCONS_00019255	3036	0.984436	-48	internaldeletion
XLOC_010364	TCONS_00019311	TCONS_00019315	0	0	1047	UTR3insertion
XLOC_010364	TCONS_00019311	TCONS_00019315	8127	1	4	UTR5insertion
XLOC_010364	TCONS_00019311	TCONS_00019315	0	0	-149	UTR3deletion
XLOC_010364	TCONS_00019314	TCONS_00019315	0	0	393	UTR3insertion
XLOC_010364	TCONS_00019314	TCONS_00019315	269	0.0330995	3	internalinsertion
XLOC_010364	TCONS_00019314	TCONS_00019315	8127	1	4	UTR5insertion
XLOC_010364	TCONS_00019314	TCONS_00019315	0	0	-149	UTR3deletion
XLOC_010364	TCONS_00019314	TCONS_00019315	2305	0.283622	-9	internaldeletion
XLOC_010434	TCONS_00019455	TCONS_00019457	9102	0.97306	412	internalinsertion
XLOC_010434	TCONS_00019455	TCONS_00019457	9102	0.97306	-252	internaldeletion
XLOC_010462	TCONS_00019517	TCONS_00019518	0	0	4	UTR3insertion
XLOC_010462	TCONS_00019517	TCONS_00019518	937	0.629281	608	internalinsertion
XLOC_010462	TCONS_00019517	TCONS_00019518	937	0.629281	-552	internaldeletion
XLOC_010465	TCONS_00019527	TCONS_00019526	384	0.717757	5	internalinsertion
XLOC_010538	TCONS_00019657	TCONS_00019658	1332	0.410857	-12	internaldeletion
XLOC_010539	TCONS_00019662	TCONS_00019664	0	0	386	UTR3insertion
XLOC_010539	TCONS_00019662	TCONS_00019664	327	1	18	UTR5insertion
XLOC_010539	TCONS_00019662	TCONS_00019664	0	0	-83	UTR3deletion
XLOC_010576	TCONS_00019726	TCONS_00019727	5097	0.829455	36	internalinsertion
XLOC_010592	TCONS_00019758	TCONS_00019756	4459	0.966616	170	internalinsertion
XLOC_010592	TCONS_00019758	TCONS_00019756	3898	0.845003	-1	internaldeletion
XLOC_010592	TCONS_00019758	TCONS_00019756	4459	0.966616	-154	internaldeletion
XLOC_010599	TCONS_00019791	TCONS_00019794	0	0	2877	UTR3insertion
XLOC_010599	TCONS_00019791	TCONS_00019794	4223	0.909737	54	internalinsertion
XLOC_010599	TCONS_00019791	TCONS_00019794	4223	0.909737	-419	internaldeletion
XLOC_010614	TCONS_00019828	TCONS_00019829	0	0	5	UTR3insertion
XLOC_010614	TCONS_00019828	TCONS_00019829	699	0.781879	97	internalinsertion
XLOC_010614	TCONS_00019828	TCONS_00019829	699	0.781879	-195	internaldeletion
XLOC_010619	TCONS_00019838	TCONS_00019841	803	0.817719	5	internalinsertion
XLOC_010638	TCONS_00019892	TCONS_00019891	7414	0.645988	3381	internalinsertion
XLOC_010638	TCONS_00019892	TCONS_00019891	11185	0.974558	36	internalinsertion
XLOC_010638	TCONS_00019892	TCONS_00019891	11477	1	17	UTR5insertion
XLOC_010638	TCONS_00019895	TCONS_00019891	7414	0.645988	3381	internalinsertion
XLOC_010638	TCONS_00019895	TCONS_00019891	11337	0.987802	113	internalinsertion
XLOC_010638	TCONS_00019895	TCONS_00019891	0	0	-2	UTR3deletion
XLOC_010638	TCONS_00019895	TCONS_00019891	11337	0.987802	-140	internaldeletion
XLOC_010654	TCONS_00019940	TCONS_00019938	0	0	1032	UTR3insertion
XLOC_010654	TCONS_00019940	TCONS_00019938	0	0	-1835	UTR3deletion
XLOC_010736	TCONS_00020131	TCONS_00020130	734	0.609635	-92	internaldeletion
XLOC_010783	TCONS_00020243	TCONS_00020241	1211	0.834022	2471	internalinsertion
XLOC_010783	TCONS_00020243	TCONS_00020241	1211	0.834022	-241	internaldeletion
XLOC_010783	TCONS_00020248	TCONS_00020241	0	0	4700	UTR3insertion
XLOC_010783	TCONS_00020248	TCONS_00020241	0	0	-1452	UTR3deletion
XLOC_010784	TCONS_00020257	TCONS_00020258	0	0	1	UTR3insertion
XLOC_010784	TCONS_00020257	TCONS_00020258	2329	1	3267	UTR5insertion
XLOC_010785	TCONS_00020262	TCONS_00020260	805	1	244	UTR5insertion
XLOC_010785	TCONS_00020262	TCONS_00020260	287	0.356522	-515	internaldeletion
XLOC_010791	TCONS_00020281	TCONS_00020279	3394	0.744298	326	internalinsertion
XLOC_010791	TCONS_00020281	TCONS_00020279	3503	0.768202	52	internalinsertion
XLOC_010828	TCONS_00020378	TCONS_00020374	0	0	286	UTR3insertion
XLOC_010828	TCONS_00020378	TCONS_00020374	0	0	-34	UTR3deletion
XLOC_010828	TCONS_00020378	TCONS_00020374	384	0.662069	-124	internaldeletion
XLOC_010830	TCONS_00020382	TCONS_00020384	0	0	1	UTR3insertion
XLOC_010830	TCONS_00020382	TCONS_00020384	1174	0.519469	24	internalinsertion
XLOC_010830	TCONS_00020382	TCONS_00020384	1174	0.519469	-1086	internaldeletion
XLOC_010868	TCONS_00020466	TCONS_00020467	363	0.1139	-9	internaldeletion
XLOC_010874	TCONS_00020481	TCONS_00020480	0	0	100	UTR3insertion
XLOC_010874	TCONS_00020481	TCONS_00020480	0	0	-845	UTR3deletion
XLOC_011367	TCONS_00021051	TCONS_00021048	301	0.74505	15	internalinsertion
XLOC_011385	TCONS_00021097	TCONS_00021092	0	0	78	UTR3insertion
XLOC_011385	TCONS_00021097	TCONS_00021092	6238	1	66	UTR5insertion
XLOC_011385	TCONS_00021097	TCONS_00021092	0	0	-2973	UTR3deletion
XLOC_011391	TCONS_00021107	TCONS_00021108	0	0	20	UTR3insertion
XLOC_011391	TCONS_00021107	TCONS_00021108	2672	1	1743	UTR5insertion
XLOC_011396	TCONS_00021127	TCONS_00021125	0	0	5785	UTR3insertion
XLOC_011396	TCONS_00021127	TCONS_00021125	0	0	-618	UTR3deletion
XLOC_011442	TCONS_00021243	TCONS_00021242	959	0.94297	867	internalinsertion
XLOC_011442	TCONS_00021243	TCONS_00021242	0	0	-11	UTR3deletion
XLOC_011442	TCONS_00021243	TCONS_00021242	959	0.94297	-58	internaldeletion
XLOC_011464	TCONS_00021303	TCONS_00021304	0	0	720	UTR3insertion
XLOC_011464	TCONS_00021303	TCONS_00021304	0	0	-68	UTR3deletion
XLOC_011489	TCONS_00021357	TCONS_00021360	0	0	749	UTR3insertion
XLOC_011489	TCONS_00021357	TCONS_00021360	0	0	-189	UTR3deletion
XLOC_011523	TCONS_00021449	TCONS_00021450	0	0	215	UTR3insertion
XLOC_011523	TCONS_00021449	TCONS_00021450	3376	0.78275	96	internalinsertion
XLOC_011523	TCONS_00021449	TCONS_00021450	4313	1	1	UTR5insertion
XLOC_011535	TCONS_00021481	TCONS_00021483	0	0	690	UTR3insertion
XLOC_011535	TCONS_00021481	TCONS_00021483	0	0	-469	UTR3deletion
XLOC_011535	TCONS_00021481	TCONS_00021483	4559	0.644018	-2520	internaldeletion
XLOC_011548	TCONS_00021514	TCONS_00021515	478	0.436131	-126	internaldeletion
XLOC_011565	TCONS_00021543	TCONS_00021545	0	0	13	UTR3insertion
XLOC_011565	TCONS_00021543	TCONS_00021545	263	0.832278	49	internalinsertion
XLOC_011565	TCONS_00021543	TCONS_00021545	263	0.832278	-53	internaldeletion
XLOC_011598	TCONS_00021613	TCONS_00021612	3050	1	7	UTR5insertion
XLOC_011598	TCONS_00021613	TCONS_00021612	2120	0.695082	-102	internaldeletion
XLOC_011650	TCONS_00021732	TCONS_00021726	0	0	43	UTR3insertion
XLOC_011650	TCONS_00021732	TCONS_00021726	718	0.814059	56	internalinsertion
XLOC_011650	TCONS_00021732	TCONS_00021726	0	0	-671	UTR3deletion
XLOC_011650	TCONS_00021732	TCONS_00021726	718	0.814059	-164	internaldeletion
XLOC_011776	TCONS_00022007	TCONS_00022006	459	0.74513	256	internalinsertion
XLOC_011776	TCONS_00022007	TCONS_00022006	616	1	112	UTR5insertion
XLOC_011793	TCONS_00022064	TCONS_00022065	0	0	83	UTR3insertion
XLOC_011793	TCONS_00022064	TCONS_00022065	269	0.169931	-122	internaldeletion
XLOC_011793	TCONS_00022064	TCONS_00022065	1392	0.879343	-49	internaldeletion
XLOC_011819	TCONS_00022125	TCONS_00022124	743	0.924129	207	internalinsertion
XLOC_011819	TCONS_00022125	TCONS_00022124	743	0.924129	-61	internaldeletion
XLOC_011896	TCONS_00022268	TCONS_00022267	1471	1	36	UTR5insertion
XLOC_012032	TCONS_00022527	TCONS_00022529	585	0.0500642	-446	internaldeletion
XLOC_012032	TCONS_00022527	TCONS_00022529	2975	0.2546	-8710	internaldeletion
XLOC_012141	TCONS_00022738	TCONS_00022735	632	0.773562	275	internalinsertion
XLOC_012141	TCONS_00022738	TCONS_00022735	632	0.773562	-185	internaldeletion
XLOC_012594	TCONS_00023366	TCONS_00023367	206	0.0319231	-73	internaldeletion
XLOC_012601	TCONS_00023382	TCONS_00023384	0	0	563	UTR3insertion
XLOC_012601	TCONS_00023382	TCONS_00023384	9983	0.728686	3	internalinsertion
XLOC_012601	TCONS_00023382	TCONS_00023384	0	0	-58	UTR3deletion
XLOC_012609	TCONS_00023403	TCONS_00023401	0	0	42	UTR3insertion
XLOC_012609	TCONS_00023403	TCONS_00023401	0	0	-31	UTR3deletion
XLOC_012612	TCONS_00023413	TCONS_00023409	0	0	108	UTR3insertion
XLOC_012612	TCONS_00023413	TCONS_00023409	820	0.50995	223	internalinsertion
XLOC_012612	TCONS_00023413	TCONS_00023409	1608	1	103	UTR5insertion
XLOC_012612	TCONS_00023413	TCONS_00023409	0	0	-87	UTR3deletion
XLOC_012652	TCONS_00023495	TCONS_00023494	0	0	-2476	UTR3deletion
XLOC_012652	TCONS_00023495	TCONS_00023494	3561	0.988892	-40	internaldeletion
XLOC_012689	TCONS_00023612	TCONS_00023613	244	0.0930587	3	internalinsertion
XLOC_012751	TCONS_00023734	TCONS_00023738	0	0	27	UTR3insertion
XLOC_012751	TCONS_00023734	TCONS_00023738	172	0.109206	221	internalinsertion
XLOC_012751	TCONS_00023734	TCONS_00023738	420	0.266667	75	internalinsertion
XLOC_012751	TCONS_00023734	TCONS_00023738	762	0.48381	24	internalinsertion
XLOC_012751	TCONS_00023734	TCONS_00023738	1575	1	4	UTR5insertion
XLOC_012751	TCONS_00023734	TCONS_00023738	363	0.230476	-27	internaldeletion
XLOC_012751	TCONS_00023734	TCONS_00023738	450	0.285714	-42	internaldeletion
XLOC_012751	TCONS_00023737	TCONS_00023738	172	0.109206	221	internalinsertion
XLOC_012751	TCONS_00023737	TCONS_00023738	420	0.266667	75	internalinsertion
XLOC_012751	TCONS_00023737	TCONS_00023738	762	0.48381	24	internalinsertion
XLOC_012751	TCONS_00023737	TCONS_00023738	1034	0.656508	74	internalinsertion
XLOC_012751	TCONS_00023737	TCONS_00023738	363	0.230476	-27	internaldeletion
XLOC_012751	TCONS_00023737	TCONS_00023738	450	0.285714	-42	internaldeletion
XLOC_012751	TCONS_00023741	TCONS_00023738	762	0.48381	24	internalinsertion
XLOC_012751	TCONS_00023741	TCONS_00023738	1575	1	4	UTR5insertion
XLOC_012883	TCONS_00023981	TCONS_00023985	0	0	463	UTR3insertion
XLOC_012883	TCONS_00023981	TCONS_00023985	1404	0.473365	-119	internaldeletion
XLOC_012906	TCONS_00024034	TCONS_00024035	2143	0.784694	1843	internalinsertion
XLOC_012906	TCONS_00024034	TCONS_00024035	1630	0.596851	-1	internaldeletion
XLOC_012920	TCONS_00024064	TCONS_00024062	206	0.0984233	3	internalinsertion
XLOC_012920	TCONS_00024064	TCONS_00024062	0	0	-169	UTR3deletion
XLOC_012920	TCONS_00024064	TCONS_00024062	206	0.0984233	-278	internaldeletion
XLOC_012920	TCONS_00024064	TCONS_00024062	706	0.337315	-5	internaldeletion
XLOC_012974	TCONS_00024202	TCONS_00024201	0	0	-41	UTR3deletion
XLOC_012974	TCONS_00024202	TCONS_00024201	66	0.0889488	-124	internaldeletion
XLOC_012978	TCONS_00024211	TCONS_00024212	4763	0.5	4	internalinsertion
XLOC_012978	TCONS_00024211	TCONS_00024212	7723	0.810729	1	internalinsertion
XLOC_012978	TCONS_00024213	TCONS_00024212	7723	0.810729	1	internalinsertion
XLOC_012978	TCONS_00024213	TCONS_00024212	0	0	-9	UTR3deletion
XLOC_012981	TCONS_00024218	TCONS_00024219	0	0	584	UTR3insertion
XLOC_012981	TCONS_00024218	TCONS_00024219	1428	0.978082	2662	internalinsertion
XLOC_012981	TCONS_00024218	TCONS_00024219	0	0	-56	UTR3deletion
XLOC_012981	TCONS_00024218	TCONS_00024219	1428	0.978082	-32	internaldeletion
XLOC_012983	TCONS_00024231	TCONS_00024230	1713	0.443897	36	internalinsertion
XLOC_012983	TCONS_00024231	TCONS_00024230	2718	0.704328	117	internalinsertion
XLOC_012983	TCONS_00024231	TCONS_00024230	0	0	-13	UTR3deletion
XLOC_012991	TCONS_00024250	TCONS_00024247	0	0	104	UTR3insertion
XLOC_012991	TCONS_00024250	TCONS_00024247	5641	1	14	UTR5insertion
XLOC_012991	TCONS_00024250	TCONS_00024247	0	0	-103	UTR3deletion
XLOC_013014	TCONS_00024319	TCONS_00024322	0	0	556	UTR3insertion
XLOC_013014	TCONS_00024319	TCONS_00024322	230	0.353846	1844	internalinsertion
XLOC_013014	TCONS_00024319	TCONS_00024322	0	0	-96	UTR3deletion
XLOC_013014	TCONS_00024319	TCONS_00024322	230	0.353846	-420	internaldeletion
XLOC_013036	TCONS_00024404	TCONS_00024405	0	0	394	UTR3insertion
XLOC_013036	TCONS_00024404	TCONS_00024405	1218	0.779271	1720	internalinsertion
XLOC_013036	TCONS_00024404	TCONS_00024405	0	0	-70	UTR3deletion
XLOC_013036	TCONS_00024404	TCONS_00024405	1218	0.779271	-345	internaldeletion
XLOC_013053	TCONS_00024437	TCONS_00024436	2903	0.973181	380	internalinsertion
XLOC_013053	TCONS_00024437	TCONS_00024436	1910	0.640295	-360	internaldeletion
XLOC_013053	TCONS_00024437	TCONS_00024436	2903	0.973181	-80	internaldeletion
XLOC_013082	TCONS_00024488	TCONS_00024487	0	0	57	UTR3insertion
XLOC_013082	TCONS_00024488	TCONS_00024487	0	0	-155	UTR3deletion
XLOC_013082	TCONS_00024488	TCONS_00024487	207	0.436709	-267	internaldeletion
XLOC_013116	TCONS_00024555	TCONS_00024552	595	0.609007	500	internalinsertion
XLOC_013116	TCONS_00024555	TCONS_00024552	595	0.609007	-382	internaldeletion
XLOC_013122	TCONS_00024571	TCONS_00024574	0	0	335	UTR3insertion
XLOC_013122	TCONS_00024571	TCONS_00024574	0	0	-399	UTR3deletion
XLOC_013122	TCONS_00024571	TCONS_00024574	2823	0.998232	-5	internaldeletion
XLOC_013170	TCONS_00024641	TCONS_00024648	0	0	154	UTR3insertion
XLOC_013170	TCONS_00024641	TCONS_00024648	1803	0.842917	258	internalinsertion
XLOC_013170	TCONS_00024641	TCONS_00024648	0	0	-98	UTR3deletion
XLOC_013170	TCONS_00024641	TCONS_00024648	1803	0.842917	-336	internaldeletion
XLOC_013170	TCONS_00024643	TCONS_00024648	0	0	154	UTR3insertion
XLOC_013170	TCONS_00024643	TCONS_00024648	2139	1	49	UTR5insertion
XLOC_013170	TCONS_00024643	TCONS_00024648	0	0	-98	UTR3deletion
XLOC_013235	TCONS_00024817	TCONS_00024816	2808	1	5950	UTR5insertion
XLOC_013235	TCONS_00024817	TCONS_00024816	0	0	-2690	UTR3deletion
XLOC_013280	TCONS_00024911	TCONS_00024912	3546	0.918177	23	internalinsertion
XLOC_013280	TCONS_00024911	TCONS_00024912	3546	0.918177	-316	internaldeletion
XLOC_013310	TCONS_00024983	TCONS_00024985	4543	0.961889	347	internalinsertion
XLOC_013310	TCONS_00024983	TCONS_00024985	4543	0.961889	-180	internaldeletion
XLOC_013456	TCONS_00025262	TCONS_00025260	866	0.122628	-3	internaldeletion
XLOC_013484	TCONS_00025360	TCONS_00025361	1743	0.820235	-153	internaldeletion
XLOC_013509	TCONS_00025416	TCONS_00025419	0	0	146	UTR3insertion
XLOC_013509	TCONS_00025416	TCONS_00025419	5910	0.977667	195	internalinsertion
XLOC_013509	TCONS_00025416	TCONS_00025419	5910	0.977667	-135	internaldeletion
XLOC_013509	TCONS_00025418	TCONS_00025419	0	0	146	UTR3insertion
XLOC_013509	TCONS_00025418	TCONS_00025419	5910	0.977667	23	internalinsertion
XLOC_013509	TCONS_00025418	TCONS_00025419	3755	0.621175	-60	internaldeletion
XLOC_013509	TCONS_00025418	TCONS_00025419	5910	0.977667	-135	internaldeletion
XLOC_013532	TCONS_00025459	TCONS_00025462	0	0	328	UTR3insertion
XLOC_013532	TCONS_00025459	TCONS_00025462	1015	0.596708	876	internalinsertion
XLOC_013532	TCONS_00025459	TCONS_00025462	1547	0.909465	110	internalinsertion
XLOC_013532	TCONS_00025459	TCONS_00025462	1547	0.909465	-154	internaldeletion
XLOC_013541	TCONS_00025478	TCONS_00025481	0	0	7	UTR3insertion
XLOC_013541	TCONS_00025478	TCONS_00025481	702	0.664773	311	internalinsertion
XLOC_013541	TCONS_00025478	TCONS_00025481	554	0.524621	-5	internaldeletion
XLOC_013541	TCONS_00025478	TCONS_00025481	702	0.664773	-354	internaldeletion
XLOC_013541	TCONS_00025479	TCONS_00025481	0	0	7	UTR3insertion
XLOC_013541	TCONS_00025479	TCONS_00025481	760	0.719697	311	internalinsertion
XLOC_013541	TCONS_00025479	TCONS_00025481	760	0.719697	-296	internaldeletion
XLOC_013613	TCONS_00025625	TCONS_00025621	1990	0.983688	136	internalinsertion
XLOC_013613	TCONS_00025625	TCONS_00025621	1990	0.983688	-33	internaldeletion
XLOC_013615	TCONS_00025631	TCONS_00025632	927	0.485086	-1	internaldeletion
XLOC_013623	TCONS_00025649	TCONS_00025648	3471	0.589604	-3	internaldeletion
XLOC_013628	TCONS_00025659	TCONS_00025656	0	0	1504	UTR3insertion
XLOC_013628	TCONS_00025659	TCONS_00025656	491	0.124367	354	internalinsertion
XLOC_013628	TCONS_00025659	TCONS_00025656	0	0	-446	UTR3deletion
XLOC_013669	TCONS_00025763	TCONS_00025764	2375	0.930278	72	internalinsertion
XLOC_013669	TCONS_00025763	TCONS_00025764	2375	0.930278	-178	internaldeletion
XLOC_014073	TCONS_00026175	TCONS_00026176	0	0	57	UTR3insertion
XLOC_014073	TCONS_00026175	TCONS_00026176	0	0	-187	UTR3deletion
XLOC_014104	TCONS_00026241	TCONS_00026242	944	0.183872	-1	internaldeletion
XLOC_014104	TCONS_00026243	TCONS_00026242	2037	0.396767	15	internalinsertion
XLOC_014121	TCONS_00026272	TCONS_00026268	0	0	42	UTR3insertion
XLOC_014121	TCONS_00026272	TCONS_00026268	1821	0.946958	4500	internalinsertion
XLOC_014121	TCONS_00026272	TCONS_00026268	0	0	-211	UTR3deletion
XLOC_014121	TCONS_00026272	TCONS_00026268	1821	0.946958	-102	internaldeletion
XLOC_014139	TCONS_00026324	TCONS_00026322	956	1	59	UTR5insertion
XLOC_014139	TCONS_00026324	TCONS_00026322	0	0	-17	UTR3deletion
XLOC_014173	TCONS_00026400	TCONS_00026403	0	0	640	UTR3insertion
XLOC_014173	TCONS_00026400	TCONS_00026403	420	0.705882	485	internalinsertion
XLOC_014173	TCONS_00026400	TCONS_00026403	0	0	-193	UTR3deletion
XLOC_014173	TCONS_00026400	TCONS_00026403	420	0.705882	-175	internaldeletion
XLOC_014232	TCONS_00026550	TCONS_00026549	0	0	37	UTR3insertion
XLOC_014232	TCONS_00026550	TCONS_00026549	0	0	-2909	UTR3deletion
XLOC_014254	TCONS_00026597	TCONS_00026595	0	0	315	UTR3insertion
XLOC_014254	TCONS_00026597	TCONS_00026595	0	0	-45	UTR3deletion
XLOC_014254	TCONS_00026597	TCONS_00026595	2833	0.802777	-71	internaldeletion
XLOC_014285	TCONS_00026659	TCONS_00026657	0	0	76	UTR3insertion
XLOC_014285	TCONS_00026659	TCONS_00026657	0	0	-722	UTR3deletion
XLOC_014285	TCONS_00026659	TCONS_00026657	734	0.600164	-489	internaldeletion
XLOC_014298	TCONS_00026681	TCONS_00026682	570	0.125551	-16	internaldeletion
XLOC_014365	TCONS_00026846	TCONS_00026850	0	0	75	UTR3insertion
XLOC_014365	TCONS_00026846	TCONS_00026850	0	0	-93	UTR3deletion
XLOC_014365	TCONS_00026846	TCONS_00026850	835	0.393497	-138	internaldeletion
XLOC_014365	TCONS_00026851	TCONS_00026850	564	0.265787	-54	internaldeletion
XLOC_014365	TCONS_00026851	TCONS_00026850	835	0.393497	-138	internaldeletion
XLOC_014383	TCONS_00026898	TCONS_00026905	0	0	60	UTR3insertion
XLOC_014383	TCONS_00026898	TCONS_00026905	1536	0.681758	60	internalinsertion
XLOC_014383	TCONS_00026898	TCONS_00026905	1536	0.681758	-717	internaldeletion
XLOC_014391	TCONS_00026941	TCONS_00026942	3458	0.996255	22	internalinsertion
XLOC_014391	TCONS_00026941	TCONS_00026942	1973	0.568424	-435	internaldeletion
XLOC_014391	TCONS_00026941	TCONS_00026942	3458	0.996255	-13	internaldeletion
XLOC_014392	TCONS_00026946	TCONS_00026947	0	0	3530	UTR3insertion
XLOC_014392	TCONS_00026946	TCONS_00026947	0	0	-340	UTR3deletion
XLOC_014412	TCONS_00026976	TCONS_00026987	1744	0.661107	21	internalinsertion
XLOC_014412	TCONS_00026976	TCONS_00026987	1744	0.661107	-894	internaldeletion
XLOC_014412	TCONS_00026980	TCONS_00026987	784	0.297195	92	internalinsertion
XLOC_014412	TCONS_00026980	TCONS_00026987	2210	0.837756	607	internalinsertion
XLOC_014412	TCONS_00026980	TCONS_00026987	2210	0.837756	-428	internaldeletion
XLOC_014429	TCONS_00027024	TCONS_00027025	0	0	9	UTR3insertion
XLOC_014429	TCONS_00027024	TCONS_00027025	3227	0.967616	71	internalinsertion
XLOC_014429	TCONS_00027024	TCONS_00027025	3227	0.967616	-108	internaldeletion
XLOC_014469	TCONS_00027134	TCONS_00027136	0	0	52	UTR3insertion
XLOC_014469	TCONS_00027134	TCONS_00027136	1564	0.920541	70	internalinsertion
XLOC_014469	TCONS_00027134	TCONS_00027136	1564	0.920541	-135	internaldeletion
XLOC_014480	TCONS_00027152	TCONS_00027153	473	0.488132	6	internalinsertion
XLOC_014480	TCONS_00027152	TCONS_00027153	473	0.488132	-109	internaldeletion
XLOC_014541	TCONS_00027249	TCONS_00027250	4663	0.977978	44	internalinsertion
XLOC_014541	TCONS_00027249	TCONS_00027250	4663	0.977978	-105	internaldeletion
XLOC_014617	TCONS_00027406	TCONS_00027408	1870	0.967909	22	internalinsertion
XLOC_014617	TCONS_00027406	TCONS_00027408	1870	0.967909	-62	internaldeletion
XLOC_015013	TCONS_00027928	TCONS_00027927	0	0	186	UTR3insertion
XLOC_015013	TCONS_00027928	TCONS_00027927	0	0	-553	UTR3deletion
XLOC_015049	TCONS_00028015	TCONS_00028013	0	0	748	UTR3insertion
XLOC_015049	TCONS_00028015	TCONS_00028013	0	0	-2284	UTR3deletion
XLOC_015091	TCONS_00028111	TCONS_00028112	109	0.0274975	-31	internaldeletion
XLOC_015211	TCONS_00028321	TCONS_00028320	1509	1	3883	UTR5insertion
XLOC_015213	TCONS_00028328	TCONS_00028327	6481	1	13	UTR5insertion
XLOC_015213	TCONS_00028328	TCONS_00028327	2475	0.381886	-189	internaldeletion
XLOC_015239	TCONS_00028376	TCONS_00028374	0	0	71	UTR3insertion
XLOC_015239	TCONS_00028376	TCONS_00028374	0	0	-1612	UTR3deletion
XLOC_015266	TCONS_00028431	TCONS_00028430	0	0	-309	UTR3deletion
XLOC_015266	TCONS_00028431	TCONS_00028430	2302	0.998698	-3	internaldeletion
XLOC_015337	TCONS_00028578	TCONS_00028580	0	0	928	UTR3insertion
XLOC_015337	TCONS_00028578	TCONS_00028580	0	0	-462	UTR3deletion
XLOC_015337	TCONS_00028578	TCONS_00028580	1231	0.458473	-1	internaldeletion
XLOC_015355	TCONS_00028631	TCONS_00028630	0	0	100	UTR3insertion
XLOC_015355	TCONS_00028631	TCONS_00028630	0	0	-21	UTR3deletion
XLOC_015395	TCONS_00028718	TCONS_00028717	2117	0.665305	68	internalinsertion
XLOC_015395	TCONS_00028718	TCONS_00028717	3182	1	13	UTR5insertion
XLOC_015395	TCONS_00028718	TCONS_00028717	3056	0.960402	-72	internaldeletion
XLOC_015496	TCONS_00028948	TCONS_00028950	1966	0.76887	-105	internaldeletion
XLOC_015496	TCONS_00028948	TCONS_00028950	2211	0.864685	-346	internaldeletion
XLOC_015701	TCONS_00029345	TCONS_00029343	1914	0.953187	483	internalinsertion
XLOC_015701	TCONS_00029345	TCONS_00029343	1914	0.953187	-94	internaldeletion
XLOC_015740	TCONS_00029453	TCONS_00029457	0	0	727	UTR3insertion
XLOC_015740	TCONS_00029453	TCONS_00029457	2754	1	103	UTR5insertion
XLOC_015740	TCONS_00029453	TCONS_00029457	1938	0.703704	-1	internaldeletion
XLOC_015752	TCONS_00029489	TCONS_00029490	0	0	92	UTR3insertion
XLOC_015752	TCONS_00029489	TCONS_00029490	1953	1	109	UTR5insertion
XLOC_015752	TCONS_00029489	TCONS_00029490	0	0	-70	UTR3deletion
XLOC_015998	TCONS_00029753	TCONS_00029754	0	0	60	UTR3insertion
XLOC_015998	TCONS_00029753	TCONS_00029754	0	0	-24	UTR3deletion
XLOC_016009	TCONS_00029779	TCONS_00029780	3472	0.671048	-3	internaldeletion
XLOC_016181	TCONS_00030172	TCONS_00030179	0	0	202	UTR3insertion
XLOC_016181	TCONS_00030172	TCONS_00030179	477	0.200842	154	internalinsertion
XLOC_016181	TCONS_00030172	TCONS_00030179	546	0.229895	57	internalinsertion
XLOC_016181	TCONS_00030172	TCONS_00030179	0	0	-386	UTR3deletion
XLOC_016181	TCONS_00030177	TCONS_00030179	0	0	202	UTR3insertion
XLOC_016181	TCONS_00030177	TCONS_00030179	477	0.200842	154	internalinsertion
XLOC_016181	TCONS_00030177	TCONS_00030179	546	0.229895	57	internalinsertion
XLOC_016181	TCONS_00030177	TCONS_00030179	2208	0.929684	1667	internalinsertion
XLOC_016181	TCONS_00030177	TCONS_00030179	0	0	-386	UTR3deletion
XLOC_016181	TCONS_00030177	TCONS_00030179	2208	0.929684	-167	internaldeletion
XLOC_016181	TCONS_00030180	TCONS_00030179	546	0.229895	57	internalinsertion
XLOC_016181	TCONS_00030180	TCONS_00030179	2375	1	144	UTR5insertion
XLOC_016181	TCONS_00030182	TCONS_00030179	878	0.369684	979	internalinsertion
XLOC_016181	TCONS_00030182	TCONS_00030179	1140	0.48	3	internalinsertion
XLOC_016181	TCONS_00030182	TCONS_00030179	2375	1	144	UTR5insertion
XLOC_016190	TCONS_00030210	TCONS_00030213	0	0	16	UTR3insertion
XLOC_016190	TCONS_00030210	TCONS_00030213	5670	1	5	UTR5insertion
XLOC_016190	TCONS_00030210	TCONS_00030213	2826	0.498413	-27	internaldeletion
XLOC_016295	TCONS_00030450	TCONS_00030448	896	0.767781	38	internalinsertion
XLOC_016295	TCONS_00030450	TCONS_00030448	546	0.467866	-106	internaldeletion
XLOC_016295	TCONS_00030450	TCONS_00030448	896	0.767781	-271	internaldeletion
XLOC_016313	TCONS_00030493	TCONS_00030495	0	0	4170	UTR3insertion
XLOC_016313	TCONS_00030493	TCONS_00030495	0	0	-275	UTR3deletion
XLOC_016317	TCONS_00030503	TCONS_00030508	0	0	108	UTR3insertion
XLOC_016317	TCONS_00030503	TCONS_00030508	761	0.302224	3	internalinsertion
XLOC_016317	TCONS_00030503	TCONS_00030508	0	0	-613	UTR3deletion
XLOC_016358	TCONS_00030620	TCONS_00030623	0	0	219	UTR3insertion
XLOC_016358	TCONS_00030620	TCONS_00030623	0	0	-217	UTR3deletion
XLOC_016552	TCONS_00030962	TCONS_00030964	0	0	914	UTR3insertion
XLOC_016552	TCONS_00030962	TCONS_00030964	407	0.183086	51	internalinsertion
XLOC_016552	TCONS_00030962	TCONS_00030964	0	0	-103	UTR3deletion
XLOC_016615	TCONS_00031074	TCONS_00031076	0	0	143	UTR3insertion
XLOC_016615	TCONS_00031074	TCONS_00031076	0	0	-28	UTR3deletion
XLOC_016615	TCONS_00031074	TCONS_00031076	2070	0.479944	-9	internaldeletion
XLOC_016638	TCONS_00031129	TCONS_00031131	442	0.201826	33	internalinsertion
XLOC_016644	TCONS_00031139	TCONS_00031138	0	0	-1624	UTR3deletion
XLOC_016644	TCONS_00031139	TCONS_00031138	2205	0.170798	-8471	internaldeletion
XLOC_016664	TCONS_00031183	TCONS_00031185	0	0	67	UTR3insertion
XLOC_016664	TCONS_00031183	TCONS_00031185	319	0.141213	115	internalinsertion
XLOC_016664	TCONS_00031183	TCONS_00031185	840	0.371846	229	internalinsertion
XLOC_016664	TCONS_00031183	TCONS_00031185	840	0.371846	-1419	internaldeletion
XLOC_016670	TCONS_00031193	TCONS_00031194	0	0	295	UTR3insertion
XLOC_016670	TCONS_00031193	TCONS_00031194	640	1	488	UTR5insertion
XLOC_016670	TCONS_00031193	TCONS_00031194	0	0	-55	UTR3deletion
XLOC_016694	TCONS_00031251	TCONS_00031248	2628	1	122	UTR5insertion
XLOC_016694	TCONS_00031251	TCONS_00031248	342	0.130137	-105	internaldeletion
XLOC_016737	TCONS_00031334	TCONS_00031336	240	0.0836237	91	internalinsertion
XLOC_016742	TCONS_00031356	TCONS_00031355	112	0.309392	100	internalinsertion
XLOC_016742	TCONS_00031356	TCONS_00031355	0	0	-106	UTR3deletion
XLOC_016744	TCONS_00031362	TCONS_00031359	0	0	42	UTR3insertion
XLOC_016744	TCONS_00031362	TCONS_00031359	629	0.324394	30	internalinsertion
XLOC_016744	TCONS_00031362	TCONS_00031359	1939	1	88	UTR5insertion
XLOC_016744	TCONS_00031362	TCONS_00031359	0	0	-55	UTR3deletion
XLOC_016826	TCONS_00031525	TCONS_00031526	0	0	141	UTR3insertion
XLOC_016826	TCONS_00031525	TCONS_00031526	2625	1	45	UTR5insertion
XLOC_016826	TCONS_00031525	TCONS_00031526	0	0	-73	UTR3deletion
XLOC_016826	TCONS_00031525	TCONS_00031526	892	0.33981	-296	internaldeletion
XLOC_016897	TCONS_00031700	TCONS_00031705	0	0	1784	UTR3insertion
XLOC_016897	TCONS_00031700	TCONS_00031705	394	0.827731	2429	internalinsertion
XLOC_016897	TCONS_00031700	TCONS_00031705	0	0	-32	UTR3deletion
XLOC_016897	TCONS_00031700	TCONS_00031705	394	0.827731	-82	internaldeletion
XLOC_017068	TCONS_00032042	TCONS_00032045	0	0	915	UTR3insertion
XLOC_017068	TCONS_00032042	TCONS_00032045	359	0.248443	1	internalinsertion
XLOC_017068	TCONS_00032042	TCONS_00032045	0	0	-284	UTR3deletion
XLOC_017075	TCONS_00032060	TCONS_00032064	105	0.0385888	68	internalinsertion
XLOC_017075	TCONS_00032060	TCONS_00032064	1096	0.402793	-60	internaldeletion
XLOC_017091	TCONS_00032134	TCONS_00032131	0	0	313	UTR3insertion
XLOC_017091	TCONS_00032134	TCONS_00032131	1713	0.32169	114	internalinsertion
XLOC_017091	TCONS_00032134	TCONS_00032131	0	0	-89	UTR3deletion
XLOC_017091	TCONS_00032134	TCONS_00032131	1713	0.32169	-215	internaldeletion
XLOC_017122	TCONS_00032221	TCONS_00032210	3113	0.678361	23	internalinsertion
XLOC_017122	TCONS_00032221	TCONS_00032210	3287	0.716278	87	internalinsertion
XLOC_017122	TCONS_00032221	TCONS_00032210	4552	0.991937	466	internalinsertion
XLOC_017122	TCONS_00032221	TCONS_00032210	4552	0.991937	-37	internaldeletion
XLOC_017127	TCONS_00032230	TCONS_00032231	940	0.402915	-2	internaldeletion
XLOC_017135	TCONS_00032247	TCONS_00032252	0	0	2382	UTR3insertion
XLOC_017135	TCONS_00032247	TCONS_00032252	500	0.522466	95	internalinsertion
XLOC_017135	TCONS_00032247	TCONS_00032252	0	0	-48	UTR3deletion
XLOC_017135	TCONS_00032247	TCONS_00032252	500	0.522466	-457	internaldeletion
XLOC_017161	TCONS_00032316	TCONS_00032315	2249	0.852863	112	internalinsertion
XLOC_017161	TCONS_00032316	TCONS_00032315	1113	0.422071	-143	internaldeletion
XLOC_017161	TCONS_00032316	TCONS_00032315	2249	0.852863	-388	internaldeletion
XLOC_017174	TCONS_00032341	TCONS_00032342	0	0	97	UTR3insertion
XLOC_017174	TCONS_00032341	TCONS_00032342	790	0.981366	118	internalinsertion
XLOC_017174	TCONS_00032341	TCONS_00032342	790	0.981366	-15	internaldeletion
XLOC_017187	TCONS_00032373	TCONS_00032367	6974	0.901034	60	internalinsertion
XLOC_017187	TCONS_00032373	TCONS_00032367	7480	0.966408	241	internalinsertion
XLOC_017217	TCONS_00032441	TCONS_00032442	2265	0.459619	87	internalinsertion
XLOC_017247	TCONS_00032519	TCONS_00032524	0	0	2678	UTR3insertion
XLOC_017247	TCONS_00032519	TCONS_00032524	1613	0.6452	183	internalinsertion
XLOC_017247	TCONS_00032519	TCONS_00032524	2400	0.96	403	internalinsertion
XLOC_017247	TCONS_00032519	TCONS_00032524	0	0	-952	UTR3deletion
XLOC_017247	TCONS_00032519	TCONS_00032524	2400	0.96	-100	internaldeletion
XLOC_017307	TCONS_00032649	TCONS_00032650	4535	0.98224	-82	internaldeletion
XLOC_017339	TCONS_00032729	TCONS_00032730	0	0	158	UTR3insertion
XLOC_017339	TCONS_00032729	TCONS_00032730	3565	1	768	UTR5insertion
XLOC_017365	TCONS_00032794	TCONS_00032795	1383	0.801275	-157	internaldeletion
XLOC_017377	TCONS_00032818	TCONS_00032819	3571	0.72952	-114	internaldeletion
XLOC_017620	TCONS_00033238	TCONS_00033237	476	0.931507	54	internalinsertion
XLOC_017620	TCONS_00033238	TCONS_00033237	476	0.931507	-35	internaldeletion
XLOC_017639	TCONS_00033277	TCONS_00033278	1380	0.540964	38	internalinsertion
XLOC_017639	TCONS_00033277	TCONS_00033278	1380	0.540964	-1171	internaldeletion
XLOC_017660	TCONS_00033317	TCONS_00033316	1793	0.948176	62	internalinsertion
XLOC_017660	TCONS_00033317	TCONS_00033316	1793	0.948176	-98	internaldeletion
XLOC_017666	TCONS_00033332	TCONS_00033330	101	0.264398	4	internalinsertion
XLOC_017666	TCONS_00033332	TCONS_00033330	382	1	6214	UTR5insertion
XLOC_017666	TCONS_00033332	TCONS_00033330	101	0.264398	-4	internaldeletion
XLOC_017722	TCONS_00033423	TCONS_00033426	0	0	118	UTR3insertion
XLOC_017722	TCONS_00033423	TCONS_00033426	2118	0.673878	5	internalinsertion
XLOC_017744	TCONS_00033481	TCONS_00033482	3407	0.742104	-1184	internaldeletion
XLOC_017831	TCONS_00033681	TCONS_00033682	1377	0.864407	-60	internaldeletion
XLOC_017847	TCONS_00033710	TCONS_00033711	2206	0.985702	267	internalinsertion
XLOC_017847	TCONS_00033710	TCONS_00033711	2213	0.988829	-25	internaldeletion
XLOC_017849	TCONS_00033718	TCONS_00033721	0	0	338	UTR3insertion
XLOC_017849	TCONS_00033718	TCONS_00033721	1037	0.467328	112	internalinsertion
XLOC_017849	TCONS_00033718	TCONS_00033721	2219	1	18	UTR5insertion
XLOC_017849	TCONS_00033718	TCONS_00033721	1241	0.559261	-71	internaldeletion
XLOC_017849	TCONS_00033718	TCONS_00033721	1858	0.837314	-169	internaldeletion
XLOC_017849	TCONS_00033719	TCONS_00033721	0	0	338	UTR3insertion
XLOC_017849	TCONS_00033719	TCONS_00033721	2219	1	18	UTR5insertion
XLOC_017849	TCONS_00033719	TCONS_00033721	1241	0.559261	-71	internaldeletion
XLOC_017864	TCONS_00033749	TCONS_00033751	0	0	3777	UTR3insertion
XLOC_017864	TCONS_00033749	TCONS_00033751	0	0	-39	UTR3deletion
XLOC_017912	TCONS_00033832	TCONS_00033834	0	0	2605	UTR3insertion
XLOC_017912	TCONS_00033832	TCONS_00033834	538	1	323	UTR5insertion
XLOC_017912	TCONS_00033832	TCONS_00033834	0	0	-225	UTR3deletion
XLOC_017912	TCONS_00033832	TCONS_00033834	433	0.804833	-34	internaldeletion
XLOC_017929	TCONS_00033892	TCONS_00033883	0	0	188	UTR3insertion
XLOC_017929	TCONS_00033892	TCONS_00033883	3364	0.86345	225	internalinsertion
XLOC_017929	TCONS_00033892	TCONS_00033883	0	0	-823	UTR3deletion
XLOC_017929	TCONS_00033892	TCONS_00033883	3364	0.86345	-532	internaldeletion
XLOC_017932	TCONS_00033902	TCONS_00033904	0	0	2	UTR3insertion
XLOC_017932	TCONS_00033902	TCONS_00033904	1004	0.540657	230	internalinsertion
XLOC_017932	TCONS_00033902	TCONS_00033904	1004	0.540657	-853	internaldeletion
XLOC_017934	TCONS_00033907	TCONS_00033908	1454	0.633827	-212	internaldeletion
XLOC_017976	TCONS_00034002	TCONS_00034004	0	0	132	UTR3insertion
XLOC_017976	TCONS_00034002	TCONS_00034004	1597	0.432323	-514	internaldeletion
XLOC_018026	TCONS_00034125	TCONS_00034124	1567	0.983679	82	internalinsertion
XLOC_018026	TCONS_00034125	TCONS_00034124	1567	0.983679	-26	internaldeletion
XLOC_018028	TCONS_00034130	TCONS_00034131	0	0	13	UTR3insertion
XLOC_018028	TCONS_00034130	TCONS_00034131	3880	0.970971	-4	internaldeletion
XLOC_018065	TCONS_00034227	TCONS_00034223	0	0	-1076	UTR3deletion
XLOC_018065	TCONS_00034227	TCONS_00034223	1158	0.550119	-947	internaldeletion
XLOC_018098	TCONS_00034292	TCONS_00034293	821	0.758079	27	internalinsertion
XLOC_018098	TCONS_00034292	TCONS_00034293	821	0.758079	-262	internaldeletion
XLOC_018098	TCONS_00034294	TCONS_00034293	0	0	-780	UTR3deletion
XLOC_018098	TCONS_00034294	TCONS_00034293	821	0.758079	-88	internaldeletion
XLOC_018098	TCONS_00034294	TCONS_00034293	957	0.883657	-126	internaldeletion
XLOC_018728	TCONS_00035054	TCONS_00035056	125	0.176305	188	internalinsertion
XLOC_018754	TCONS_00035127	TCONS_00035117	8970	0.566717	51	internalinsertion
XLOC_018754	TCONS_00035127	TCONS_00035117	12122	0.765858	105	internalinsertion
XLOC_018754	TCONS_00035127	TCONS_00035117	0	0	-58	UTR3deletion
XLOC_018754	TCONS_00035127	TCONS_00035117	12424	0.784938	-1	internaldeletion
XLOC_018768	TCONS_00035157	TCONS_00035159	0	0	117	UTR3insertion
XLOC_018768	TCONS_00035157	TCONS_00035159	640	0.180434	-4	internaldeletion
XLOC_018768	TCONS_00035157	TCONS_00035159	1553	0.437835	-44	internaldeletion
XLOC_018817	TCONS_00035287	TCONS_00035284	0	0	19	UTR3insertion
XLOC_018817	TCONS_00035287	TCONS_00035284	0	0	-547	UTR3deletion
XLOC_018825	TCONS_00035303	TCONS_00035307	172	0.0305127	-1049	internaldeletion
XLOC_018825	TCONS_00035303	TCONS_00035307	2059	0.365265	-131	internaldeletion
XLOC_018825	TCONS_00035303	TCONS_00035307	5634	0.999468	-3	internaldeletion
XLOC_018859	TCONS_00035382	TCONS_00035379	0	0	6672	UTR3insertion
XLOC_018859	TCONS_00035382	TCONS_00035379	0	0	-756	UTR3deletion
XLOC_018869	TCONS_00035405	TCONS_00035406	0	0	171	UTR3insertion
XLOC_018869	TCONS_00035405	TCONS_00035406	723	0.91635	262	internalinsertion
XLOC_018869	TCONS_00035405	TCONS_00035406	441	0.558935	-86	internaldeletion
XLOC_018869	TCONS_00035405	TCONS_00035406	723	0.91635	-66	internaldeletion
XLOC_018875	TCONS_00035415	TCONS_00035414	896	0.188433	222	internalinsertion
XLOC_018993	TCONS_00035658	TCONS_00035656	51	0.0415648	6	internalinsertion
XLOC_018993	TCONS_00035658	TCONS_00035656	0	0	-6	UTR3deletion
XLOC_018999	TCONS_00035679	TCONS_00035677	3190	0.420567	1041	internalinsertion
XLOC_018999	TCONS_00035679	TCONS_00035677	0	0	-42	UTR3deletion
XLOC_018999	TCONS_00035679	TCONS_00035677	3190	0.420567	-4395	internaldeletion
XLOC_019011	TCONS_00035722	TCONS_00035721	0	0	31	UTR3insertion
XLOC_019011	TCONS_00035722	TCONS_00035721	1511	1	192	UTR5insertion
XLOC_019011	TCONS_00035722	TCONS_00035721	0	0	-47	UTR3deletion
XLOC_019076	TCONS_00035879	TCONS_00035877	2924	1	103	UTR5insertion
XLOC_019076	TCONS_00035879	TCONS_00035877	643	0.219904	-135	internaldeletion
XLOC_019081	TCONS_00035890	TCONS_00035893	803	0.140287	266	internalinsertion
XLOC_019081	TCONS_00035890	TCONS_00035893	1846	0.322502	-96	internaldeletion
XLOC_019082	TCONS_00035897	TCONS_00035896	243	0.731928	189	internalinsertion
XLOC_019082	TCONS_00035897	TCONS_00035896	243	0.731928	-89	internaldeletion
XLOC_019094	TCONS_00035929	TCONS_00035922	0	0	1800	UTR3insertion
XLOC_019094	TCONS_00035929	TCONS_00035922	1601	1	3	UTR5insertion
XLOC_019094	TCONS_00035929	TCONS_00035922	0	0	-147	UTR3deletion
XLOC_019216	TCONS_00036167	TCONS_00036168	0	0	60	UTR3insertion
XLOC_019216	TCONS_00036167	TCONS_00036168	0	0	-175	UTR3deletion
XLOC_019254	TCONS_00036247	TCONS_00036246	270	0.536779	11	internalinsertion
XLOC_019254	TCONS_00036247	TCONS_00036246	270	0.536779	-233	internaldeletion
XLOC_019361	TCONS_00036477	TCONS_00036480	0	0	2027	UTR3insertion
XLOC_019361	TCONS_00036477	TCONS_00036480	0	0	-66	UTR3deletion
XLOC_019361	TCONS_00036477	TCONS_00036480	210	0.40619	-49	internaldeletion
XLOC_019379	TCONS_00036510	TCONS_00036503	0	0	1966	UTR3insertion
XLOC_019379	TCONS_00036510	TCONS_00036503	565	0.552838	433	internalinsertion
XLOC_019379	TCONS_00036510	TCONS_00036503	0	0	-99	UTR3deletion
XLOC_019379	TCONS_00036510	TCONS_00036503	565	0.552838	-457	internaldeletion
XLOC_019477	TCONS_00036698	TCONS_00036702	0	0	415	UTR3insertion
XLOC_019477	TCONS_00036698	TCONS_00036702	2017	0.880017	108	internalinsertion
XLOC_019477	TCONS_00036698	TCONS_00036702	2017	0.880017	-275	internaldeletion
XLOC_019555	TCONS_00036915	TCONS_00036916	2823	0.778329	60	internalinsertion
XLOC_019555	TCONS_00036915	TCONS_00036916	3078	0.848635	33	internalinsertion
XLOC_019562	TCONS_00036937	TCONS_00036939	0	0	354	UTR3insertion
XLOC_019562	TCONS_00036937	TCONS_00036939	3247	1	186	UTR5insertion
XLOC_019562	TCONS_00036937	TCONS_00036939	1629	0.501694	-1283	internaldeletion
XLOC_019565	TCONS_00036944	TCONS_00036942	463	0.942974	151	internalinsertion
XLOC_019565	TCONS_00036944	TCONS_00036942	463	0.942974	-28	internaldeletion
XLOC_019622	TCONS_00037042	TCONS_00037039	348	0.932976	1703	internalinsertion
XLOC_019622	TCONS_00037042	TCONS_00037039	348	0.932976	-25	internaldeletion
XLOC_019622	TCONS_00037046	TCONS_00037039	348	0.932976	2084	internalinsertion
XLOC_019622	TCONS_00037046	TCONS_00037039	0	0	-2	UTR3deletion
XLOC_019622	TCONS_00037046	TCONS_00037039	348	0.932976	-25	internaldeletion
XLOC_019639	TCONS_00037083	TCONS_00037081	0	0	233	UTR3insertion
XLOC_019639	TCONS_00037083	TCONS_00037081	0	0	-296	UTR3deletion
XLOC_019677	TCONS_00037181	TCONS_00037177	0	0	4671	UTR3insertion
XLOC_019677	TCONS_00037181	TCONS_00037177	0	0	-1556	UTR3deletion
XLOC_019677	TCONS_00037181	TCONS_00037177	5226	0.985852	-75	internaldeletion
XLOC_019692	TCONS_00037216	TCONS_00037215	1438	0.942951	191	internalinsertion
XLOC_019692	TCONS_00037216	TCONS_00037215	554	0.363279	-1	internaldeletion
XLOC_019692	TCONS_00037216	TCONS_00037215	1438	0.942951	-87	internaldeletion
XLOC_019712	TCONS_00037247	TCONS_00037248	0	0	124	UTR3insertion
XLOC_019712	TCONS_00037247	TCONS_00037248	676	0.586806	-1	internaldeletion
XLOC_019760	TCONS_00037346	TCONS_00037347	880	0.405343	-153	internaldeletion
XLOC_019771	TCONS_00037380	TCONS_00037382	0	0	8	UTR3insertion
XLOC_019771	TCONS_00037380	TCONS_00037382	4014	1	8	UTR5insertion
XLOC_019771	TCONS_00037380	TCONS_00037382	2196	0.547085	-47	internaldeletion
XLOC_019771	TCONS_00037381	TCONS_00037382	0	0	8	UTR3insertion
XLOC_019771	TCONS_00037381	TCONS_00037382	4014	1	43	UTR5insertion
XLOC_019771	TCONS_00037381	TCONS_00037382	3021	0.752616	-73	internaldeletion
XLOC_019799	TCONS_00037435	TCONS_00037436	3927	0.678238	-140	internaldeletion
XLOC_019869	TCONS_00037582	TCONS_00037577	0	0	-1823	UTR3deletion
XLOC_019869	TCONS_00037582	TCONS_00037577	1884	0.932673	-136	internaldeletion
XLOC_020293	TCONS_00038031	TCONS_00038032	8125	0.860426	-33	internaldeletion
XLOC_020313	TCONS_00038074	TCONS_00038073	1004	0.611449	34	internalinsertion
XLOC_020313	TCONS_00038074	TCONS_00038073	0	0	-30	UTR3deletion
XLOC_020313	TCONS_00038074	TCONS_00038073	1004	0.611449	-638	internaldeletion
XLOC_020360	TCONS_00038163	TCONS_00038164	0	0	11	UTR3insertion
XLOC_020360	TCONS_00038163	TCONS_00038164	141	0.358779	-1	internaldeletion
XLOC_020405	TCONS_00038256	TCONS_00038253	634	0.587037	54	internalinsertion
XLOC_020428	TCONS_00038303	TCONS_00038304	0	0	3	UTR3insertion
XLOC_020428	TCONS_00038303	TCONS_00038304	5666	1	2	UTR5insertion
XLOC_020428	TCONS_00038303	TCONS_00038304	338	0.0596541	-12	internaldeletion
XLOC_020458	TCONS_00038391	TCONS_00038392	727	0.169109	-1	internaldeletion
XLOC_020478	TCONS_00038443	TCONS_00038445	0	0	11	UTR3insertion
XLOC_020478	TCONS_00038443	TCONS_00038445	1743	1	22	UTR5insertion
XLOC_020478	TCONS_00038443	TCONS_00038445	950	0.545037	-375	internaldeletion
XLOC_020481	TCONS_00038458	TCONS_00038464	0	0	133	UTR3insertion
XLOC_020481	TCONS_00038458	TCONS_00038464	0	0	-47	UTR3deletion
XLOC_020481	TCONS_00038458	TCONS_00038464	759	0.672872	-243	internaldeletion
XLOC_020518	TCONS_00038533	TCONS_00038534	0	0	5	UTR3insertion
XLOC_020518	TCONS_00038533	TCONS_00038534	3476	0.599724	40	internalinsertion
XLOC_020518	TCONS_00038533	TCONS_00038534	3476	0.599724	-2320	internaldeletion
XLOC_020564	TCONS_00038617	TCONS_00038621	2094	0.984485	1084	internalinsertion
XLOC_020564	TCONS_00038617	TCONS_00038621	2094	0.984485	-33	internaldeletion
XLOC_020604	TCONS_00038713	TCONS_00038715	0	0	108	UTR3insertion
XLOC_020604	TCONS_00038713	TCONS_00038715	0	0	-76	UTR3deletion
XLOC_020620	TCONS_00038753	TCONS_00038752	0	0	76	UTR3insertion
XLOC_020620	TCONS_00038753	TCONS_00038752	0	0	-4155	UTR3deletion
XLOC_020658	TCONS_00038826	TCONS_00038831	0	0	443	UTR3insertion
XLOC_020658	TCONS_00038826	TCONS_00038831	681	0.273384	99	internalinsertion
XLOC_020665	TCONS_00038852	TCONS_00038856	0	0	1124	UTR3insertion
XLOC_020665	TCONS_00038852	TCONS_00038856	1214	1	1	UTR5insertion
XLOC_020667	TCONS_00038860	TCONS_00038858	1367	0.787442	70	internalinsertion
XLOC_020667	TCONS_00038860	TCONS_00038858	0	0	-1360	UTR3deletion
XLOC_020667	TCONS_00038860	TCONS_00038858	1367	0.787442	-369	internaldeletion
XLOC_020726	TCONS_00038970	TCONS_00038971	0	0	109	UTR3insertion
XLOC_020726	TCONS_00038970	TCONS_00038971	0	0	-3526	UTR3deletion
XLOC_020787	TCONS_00039101	TCONS_00039102	388	0.0725912	-95	internaldeletion
XLOC_020787	TCONS_00039101	TCONS_00039102	552	0.103274	-726	internaldeletion
XLOC_020787	TCONS_00039101	TCONS_00039102	1372	0.256688	-3	internaldeletion
XLOC_020787	TCONS_00039103	TCONS_00039102	552	0.103274	-726	internaldeletion
XLOC_020797	TCONS_00039132	TCONS_00039129	0	0	54	UTR3insertion
XLOC_020797	TCONS_00039132	TCONS_00039129	2254	1	367	UTR5insertion
XLOC_020797	TCONS_00039132	TCONS_00039129	0	0	-232	UTR3deletion
XLOC_020809	TCONS_00039156	TCONS_00039159	0	0	116	UTR3insertion
XLOC_020809	TCONS_00039156	TCONS_00039159	567	0.0911869	14	internalinsertion
XLOC_020809	TCONS_00039156	TCONS_00039159	5606	0.901576	1124	internalinsertion
XLOC_020809	TCONS_00039156	TCONS_00039159	0	0	-376	UTR3deletion
XLOC_020809	TCONS_00039156	TCONS_00039159	5606	0.901576	-612	internaldeletion
XLOC_020824	TCONS_00039198	TCONS_00039197	0	0	32	UTR3insertion
XLOC_020824	TCONS_00039198	TCONS_00039197	0	0	-291	UTR3deletion
XLOC_020830	TCONS_00039217	TCONS_00039216	891	0.629682	679	internalinsertion
XLOC_020830	TCONS_00039217	TCONS_00039216	0	0	-21	UTR3deletion
XLOC_020830	TCONS_00039217	TCONS_00039216	891	0.629682	-524	internaldeletion
XLOC_020850	TCONS_00039260	TCONS_00039263	0	0	125	UTR3insertion
XLOC_020850	TCONS_00039260	TCONS_00039263	0	0	-479	UTR3deletion
XLOC_020861	TCONS_00039302	TCONS_00039307	0	0	1761	UTR3insertion
XLOC_020861	TCONS_00039302	TCONS_00039307	1763	0.427809	57	internalinsertion
XLOC_020861	TCONS_00039302	TCONS_00039307	0	0	-82	UTR3deletion
XLOC_020861	TCONS_00039302	TCONS_00039307	1669	0.404999	-1	internaldeletion
XLOC_020880	TCONS_00039354	TCONS_00039353	3355	1	19	UTR5insertion
XLOC_020880	TCONS_00039354	TCONS_00039353	1427	0.425335	-153	internaldeletion
XLOC_020954	TCONS_00039474	TCONS_00039476	0	0	333	UTR3insertion
XLOC_020954	TCONS_00039474	TCONS_00039476	3645	0.872218	3956	internalinsertion
XLOC_020954	TCONS_00039474	TCONS_00039476	0	0	-125	UTR3deletion
XLOC_020954	TCONS_00039474	TCONS_00039476	3645	0.872218	-534	internaldeletion
XLOC_020980	TCONS_00039528	TCONS_00039530	3375	0.683614	-1303	internaldeletion
XLOC_021014	TCONS_00039649	TCONS_00039650	816	0.617714	-12	internaldeletion
XLOC_021018	TCONS_00039666	TCONS_00039656	0	0	-34	UTR3deletion
XLOC_021018	TCONS_00039666	TCONS_00039656	343	0.0604299	-2693	internaldeletion
XLOC_021073	TCONS_00039791	TCONS_00039792	1443	0.364118	-4	internaldeletion
XLOC_021073	TCONS_00039791	TCONS_00039792	3952	0.997224	-11	internaldeletion
XLOC_021119	TCONS_00039899	TCONS_00039901	0	0	405	UTR3insertion
XLOC_021119	TCONS_00039899	TCONS_00039901	0	0	-882	UTR3deletion
XLOC_021140	TCONS_00039955	TCONS_00039956	283	0.276367	76	internalinsertion
XLOC_021140	TCONS_00039955	TCONS_00039956	283	0.276367	-76	internaldeletion
XLOC_021140	TCONS_00039955	TCONS_00039956	998	0.974609	-26	internaldeletion
XLOC_021146	TCONS_00039967	TCONS_00039969	0	0	171	UTR3insertion
XLOC_021146	TCONS_00039967	TCONS_00039969	1763	1	37	UTR5insertion
XLOC_021146	TCONS_00039967	TCONS_00039969	1497	0.849121	-80	internaldeletion
XLOC_021170	TCONS_00040013	TCONS_00040015	0	0	4063	UTR3insertion
XLOC_021170	TCONS_00040013	TCONS_00040015	3774	0.917802	113	internalinsertion
XLOC_021170	TCONS_00040013	TCONS_00040015	3774	0.917802	-338	internaldeletion
XLOC_021211	TCONS_00040092	TCONS_00040089	3291	0.952533	71	internalinsertion
XLOC_021211	TCONS_00040092	TCONS_00040089	3291	0.952533	-164	internaldeletion
XLOC_021261	TCONS_00040204	TCONS_00040205	2861	0.654841	-222	internaldeletion
XLOC_021336	TCONS_00040357	TCONS_00040356	3649	0.68862	75	internalinsertion
XLOC_021336	TCONS_00040357	TCONS_00040356	0	0	-3643	UTR3deletion
XLOC_021336	TCONS_00040357	TCONS_00040356	3649	0.68862	-1650	internaldeletion
XLOC_021352	TCONS_00040389	TCONS_00040390	101	0.0689891	506	internalinsertion
XLOC_021352	TCONS_00040389	TCONS_00040390	1252	0.855191	-10	internaldeletion
XLOC_021352	TCONS_00040389	TCONS_00040390	1319	0.900956	-31	internaldeletion
XLOC_021415	TCONS_00040505	TCONS_00040506	0	0	169	UTR3insertion
XLOC_021415	TCONS_00040505	TCONS_00040506	1464	0.796952	-66	internaldeletion
XLOC_021447	TCONS_00040584	TCONS_00040587	0	0	2566	UTR3insertion
XLOC_021447	TCONS_00040584	TCONS_00040587	1073	1	289	UTR5insertion
XLOC_021447	TCONS_00040584	TCONS_00040587	0	0	-170	UTR3deletion
XLOC_021447	TCONS_00040584	TCONS_00040587	677	0.630941	-126	internaldeletion
XLOC_021457	TCONS_00040602	TCONS_00040604	0	0	1893	UTR3insertion
XLOC_021457	TCONS_00040602	TCONS_00040604	0	0	-92	UTR3deletion
XLOC_021532	TCONS_00040759	TCONS_00040758	1690	0.984275	124	internalinsertion
XLOC_021532	TCONS_00040759	TCONS_00040758	447	0.260338	-11	internaldeletion
XLOC_021532	TCONS_00040759	TCONS_00040758	1690	0.984275	-27	internaldeletion
XLOC_021624	TCONS_00040934	TCONS_00040936	0	0	879	UTR3insertion
XLOC_021624	TCONS_00040934	TCONS_00040936	862	0.22349	-1	internaldeletion
XLOC_021627	TCONS_00040940	TCONS_00040941	0	0	3	UTR3insertion
XLOC_021627	TCONS_00040940	TCONS_00040941	1833	0.928101	301	internalinsertion
XLOC_021627	TCONS_00040940	TCONS_00040941	1522	0.770633	-145	internaldeletion
XLOC_021627	TCONS_00040940	TCONS_00040941	1833	0.928101	-142	internaldeletion
XLOC_021628	TCONS_00040946	TCONS_00040947	0	0	4367	UTR3insertion
XLOC_021712	TCONS_00041132	TCONS_00041133	0	0	1	UTR3insertion
XLOC_021712	TCONS_00041132	TCONS_00041133	681	0.732258	-19	internaldeletion
XLOC_021715	TCONS_00041140	TCONS_00041138	0	0	1322	UTR3insertion
XLOC_021715	TCONS_00041140	TCONS_00041138	0	0	-18	UTR3deletion
XLOC_021715	TCONS_00041140	TCONS_00041138	4204	0.985236	-63	internaldeletion
XLOC_022257	TCONS_00041801	TCONS_00041802	431	0.155036	-19	internaldeletion
XLOC_022294	TCONS_00041869	TCONS_00041874	0	0	587	UTR3insertion
XLOC_022294	TCONS_00041869	TCONS_00041874	0	0	-258	UTR3deletion
XLOC_022294	TCONS_00041870	TCONS_00041874	0	0	818	UTR3insertion
XLOC_022294	TCONS_00041870	TCONS_00041874	0	0	-258	UTR3deletion
XLOC_022309	TCONS_00041899	TCONS_00041897	0	0	29	UTR3insertion
XLOC_022309	TCONS_00041899	TCONS_00041897	4176	1	12	UTR5insertion
XLOC_022309	TCONS_00041899	TCONS_00041897	0	0	-204	UTR3deletion
XLOC_022309	TCONS_00041899	TCONS_00041897	1692	0.405172	-12	internaldeletion
XLOC_022309	TCONS_00041900	TCONS_00041897	0	0	28	UTR3insertion
XLOC_022309	TCONS_00041900	TCONS_00041897	4176	1	12	UTR5insertion
XLOC_022309	TCONS_00041900	TCONS_00041897	0	0	-204	UTR3deletion
XLOC_022309	TCONS_00041900	TCONS_00041897	1692	0.405172	-12	internaldeletion
XLOC_022343	TCONS_00041986	TCONS_00041987	0	0	39	UTR3insertion
XLOC_022343	TCONS_00041986	TCONS_00041987	219	0.0880933	-88	internaldeletion
XLOC_022348	TCONS_00041996	TCONS_00041994	0	0	43	UTR3insertion
XLOC_022348	TCONS_00041996	TCONS_00041994	0	0	-391	UTR3deletion
XLOC_022469	TCONS_00042281	TCONS_00042280	0	0	22	UTR3insertion
XLOC_022469	TCONS_00042281	TCONS_00042280	0	0	-10	UTR3deletion
XLOC_022481	TCONS_00042299	TCONS_00042301	0	0	23	UTR3insertion
XLOC_022481	TCONS_00042299	TCONS_00042301	5627	0.981853	324	internalinsertion
XLOC_022481	TCONS_00042299	TCONS_00042301	5627	0.981853	-104	internaldeletion
XLOC_022504	TCONS_00042362	TCONS_00042361	0	0	53	UTR3insertion
XLOC_022504	TCONS_00042362	TCONS_00042361	1949	1	175	UTR5insertion
XLOC_022504	TCONS_00042362	TCONS_00042361	0	0	-515	UTR3deletion
XLOC_022553	TCONS_00042462	TCONS_00042465	0	0	58	UTR3insertion
XLOC_022553	TCONS_00042462	TCONS_00042465	1361	0.623454	2108	internalinsertion
XLOC_022553	TCONS_00042462	TCONS_00042465	0	0	-202	UTR3deletion
XLOC_022553	TCONS_00042462	TCONS_00042465	1361	0.623454	-822	internaldeletion
XLOC_022607	TCONS_00042566	TCONS_00042564	1005	0.681356	354	internalinsertion
XLOC_022607	TCONS_00042566	TCONS_00042564	280	0.189831	-29	internaldeletion
XLOC_022612	TCONS_00042574	TCONS_00042573	0	0	133	UTR3insertion
XLOC_022612	TCONS_00042574	TCONS_00042573	0	0	-1274	UTR3deletion
XLOC_022651	TCONS_00042674	TCONS_00042677	292	0.178157	24	internalinsertion
XLOC_022651	TCONS_00042674	TCONS_00042677	292	0.178157	-1347	internaldeletion
XLOC_022661	TCONS_00042713	TCONS_00042714	0	0	91	UTR3insertion
XLOC_022661	TCONS_00042713	TCONS_00042714	0	0	-47	UTR3deletion
XLOC_022679	TCONS_00042754	TCONS_00042753	2761	1	149	UTR5insertion
XLOC_022679	TCONS_00042754	TCONS_00042753	102	0.0369431	-31	internaldeletion
XLOC_022679	TCONS_00042754	TCONS_00042753	819	0.296632	-85	internaldeletion
XLOC_022700	TCONS_00042794	TCONS_00042793	0	0	163	UTR3insertion
XLOC_022700	TCONS_00042794	TCONS_00042793	0	0	-191	UTR3deletion
XLOC_022723	TCONS_00042845	TCONS_00042844	0	0	31	UTR3insertion
XLOC_022723	TCONS_00042845	TCONS_00042844	0	0	-44	UTR3deletion
XLOC_022818	TCONS_00043047	TCONS_00043048	219	0.235231	-1	internaldeletion
XLOC_022829	TCONS_00043073	TCONS_00043074	489	0.148047	-47	internaldeletion
XLOC_022829	TCONS_00043073	TCONS_00043074	668	0.20224	-1	internaldeletion
XLOC_022845	TCONS_00043107	TCONS_00043105	0	0	157	UTR3insertion
XLOC_022845	TCONS_00043107	TCONS_00043105	0	0	-44	UTR3deletion
XLOC_022845	TCONS_00043107	TCONS_00043105	1391	0.474258	-2	internaldeletion
XLOC_022876	TCONS_00043169	TCONS_00043170	0	0	273	UTR3insertion
XLOC_022876	TCONS_00043169	TCONS_00043170	607	1	769	UTR5insertion
XLOC_022876	TCONS_00043169	TCONS_00043170	0	0	-58	UTR3deletion
XLOC_022984	TCONS_00043389	TCONS_00043391	0	0	58	UTR3insertion
XLOC_022984	TCONS_00043389	TCONS_00043391	4628	1	1	UTR5insertion
XLOC_022984	TCONS_00043389	TCONS_00043391	2491	0.538245	-1843	internaldeletion
XLOC_022985	TCONS_00043394	TCONS_00043395	0	0	85	UTR3insertion
XLOC_022985	TCONS_00043394	TCONS_00043395	469	0.308553	20	internalinsertion
XLOC_022999	TCONS_00043418	TCONS_00043416	117	0.0768221	1012	internalinsertion
XLOC_022999	TCONS_00043418	TCONS_00043416	0	0	-35	UTR3deletion
XLOC_022999	TCONS_00043418	TCONS_00043416	117	0.0768221	-1406	internaldeletion
XLOC_023005	TCONS_00043436	TCONS_00043440	0	0	401	UTR3insertion
XLOC_023005	TCONS_00043436	TCONS_00043440	0	0	-280	UTR3deletion
XLOC_023062	TCONS_00043581	TCONS_00043572	0	0	4049	UTR3insertion
XLOC_023062	TCONS_00043581	TCONS_00043572	2719	1	78	UTR5insertion
XLOC_023062	TCONS_00043581	TCONS_00043572	0	0	-273	UTR3deletion
XLOC_023068	TCONS_00043592	TCONS_00043593	3428	0.81213	-61	internaldeletion
XLOC_023123	TCONS_00043720	TCONS_00043722	961	0.387188	-3	internaldeletion
XLOC_023123	TCONS_00043720	TCONS_00043722	2063	0.831185	-193	internaldeletion
XLOC_023175	TCONS_00043843	TCONS_00043826	0	0	343	UTR3insertion
XLOC_023175	TCONS_00043843	TCONS_00043826	0	0	-983	UTR3deletion
XLOC_023175	TCONS_00043843	TCONS_00043826	3605	0.917536	-324	internaldeletion
XLOC_023175	TCONS_00043850	TCONS_00043826	0	0	106	UTR3insertion
XLOC_023175	TCONS_00043850	TCONS_00043826	3605	0.917536	235	internalinsertion
XLOC_023175	TCONS_00043850	TCONS_00043826	0	0	-983	UTR3deletion
XLOC_023175	TCONS_00043850	TCONS_00043826	2398	0.610333	-75	internaldeletion
XLOC_023175	TCONS_00043850	TCONS_00043826	3605	0.917536	-324	internaldeletion
XLOC_023227	TCONS_00043978	TCONS_00043975	0	0	740	UTR3insertion
XLOC_023227	TCONS_00043978	TCONS_00043975	0	0	-61	UTR3deletion
XLOC_023227	TCONS_00043978	TCONS_00043975	627	0.526448	-6	internaldeletion
XLOC_023227	TCONS_00043978	TCONS_00043975	1159	0.973132	-32	internaldeletion
XLOC_023264	TCONS_00044058	TCONS_00044059	614	0.548214	93	internalinsertion
XLOC_023301	TCONS_00044108	TCONS_00044107	949	0.713534	4	internalinsertion
XLOC_023301	TCONS_00044108	TCONS_00044107	681	0.51203	-3	internaldeletion
XLOC_023309	TCONS_00044124	TCONS_00044125	2061	0.506886	-89	internaldeletion
XLOC_023309	TCONS_00044124	TCONS_00044125	3623	0.891048	-199	internaldeletion
XLOC_023343	TCONS_00044198	TCONS_00044201	1100	0.272953	84	internalinsertion
XLOC_023343	TCONS_00044198	TCONS_00044201	2391	0.5933	117	internalinsertion
XLOC_023343	TCONS_00044198	TCONS_00044201	3898	0.967246	28	internalinsertion
XLOC_023343	TCONS_00044198	TCONS_00044201	3898	0.967246	-132	internaldeletion
XLOC_023347	TCONS_00044218	TCONS_00044219	1178	0.748887	-5	internaldeletion
XLOC_023378	TCONS_00044299	TCONS_00044305	0	0	679	UTR3insertion
XLOC_023378	TCONS_00044299	TCONS_00044305	5	0.00116932	1	internalinsertion
XLOC_023378	TCONS_00044299	TCONS_00044305	3954	0.924696	114	internalinsertion
XLOC_023418	TCONS_00044375	TCONS_00044382	0	0	8663	UTR3insertion
XLOC_023418	TCONS_00044375	TCONS_00044382	0	0	-386	UTR3deletion
XLOC_023504	TCONS_00044567	TCONS_00044569	4787	0.853146	-1	internaldeletion
XLOC_023507	TCONS_00044578	TCONS_00044580	0	0	2884	UTR3insertion
XLOC_023507	TCONS_00044578	TCONS_00044580	0	0	-3092	UTR3deletion
XLOC_023531	TCONS_00044646	TCONS_00044647	4698	0.698068	228	internalinsertion
XLOC_023531	TCONS_00044646	TCONS_00044647	6690	0.994056	43	internalinsertion
XLOC_023531	TCONS_00044646	TCONS_00044647	1623	0.241159	-9	internaldeletion
XLOC_023531	TCONS_00044646	TCONS_00044647	6690	0.994056	-40	internaldeletion
XLOC_023538	TCONS_00044666	TCONS_00044669	0	0	5204	UTR3insertion
XLOC_023538	TCONS_00044666	TCONS_00044669	1476	0.985972	1	internalinsertion
XLOC_023538	TCONS_00044666	TCONS_00044669	0	0	-61	UTR3deletion
XLOC_023538	TCONS_00044666	TCONS_00044669	1476	0.985972	-21	internaldeletion
XLOC_023566	TCONS_00044753	TCONS_00044755	0	0	7148	UTR3insertion
XLOC_023566	TCONS_00044753	TCONS_00044755	1329	0.786856	-6	internaldeletion
XLOC_023573	TCONS_00044768	TCONS_00044767	310	0.868347	48	internalinsertion
XLOC_023573	TCONS_00044768	TCONS_00044767	310	0.868347	-47	internaldeletion
XLOC_023580	TCONS_00044787	TCONS_00044790	3252	0.741788	57	internalinsertion
XLOC_023580	TCONS_00044787	TCONS_00044790	3132	0.714416	-63	internaldeletion
XLOC_023581	TCONS_00044802	TCONS_00044795	3311	0.956384	208	internalinsertion
XLOC_023581	TCONS_00044802	TCONS_00044795	985	0.284518	-213	internaldeletion
XLOC_023581	TCONS_00044802	TCONS_00044795	3311	0.956384	-151	internaldeletion
XLOC_023618	TCONS_00044882	TCONS_00044885	0	0	91	UTR3insertion
XLOC_023618	TCONS_00044882	TCONS_00044885	3024	1	18	UTR5insertion
XLOC_023618	TCONS_00044882	TCONS_00044885	420	0.138889	-12	internaldeletion
XLOC_023618	TCONS_00044882	TCONS_00044885	1300	0.429894	-1	internaldeletion
XLOC_023626	TCONS_00044903	TCONS_00044908	0	0	2647	UTR3insertion
XLOC_023626	TCONS_00044903	TCONS_00044908	1739	0.805465	15	internalinsertion
XLOC_023626	TCONS_00044903	TCONS_00044908	2019	0.935155	69	internalinsertion
XLOC_023641	TCONS_00044926	TCONS_00044927	0	0	398	UTR3insertion
XLOC_023641	TCONS_00044926	TCONS_00044927	903	0.398852	461	internalinsertion
XLOC_023641	TCONS_00044926	TCONS_00044927	903	0.398852	-1361	internaldeletion
XLOC_023646	TCONS_00044939	TCONS_00044941	4387	0.927288	-96	internaldeletion
XLOC_023656	TCONS_00044959	TCONS_00044958	6888	0.994944	248	internalinsertion
XLOC_023656	TCONS_00044959	TCONS_00044958	0	0	-23	UTR3deletion
XLOC_023656	TCONS_00044959	TCONS_00044958	6888	0.994944	-35	internaldeletion
XLOC_023706	TCONS_00045067	TCONS_00045069	0	0	37	UTR3insertion
XLOC_023706	TCONS_00045067	TCONS_00045069	3031	0.963446	78	internalinsertion
XLOC_023706	TCONS_00045067	TCONS_00045069	3114	0.989828	240	internalinsertion
XLOC_023706	TCONS_00045067	TCONS_00045069	3114	0.989828	-32	internaldeletion
XLOC_023719	TCONS_00045098	TCONS_00045097	450	0.716561	116	internalinsertion
XLOC_023719	TCONS_00045098	TCONS_00045097	450	0.716561	-178	internaldeletion
XLOC_024289	TCONS_00045693	TCONS_00045690	6666	1	2	UTR5insertion
XLOC_024289	TCONS_00045693	TCONS_00045690	2461	0.369187	-90	internaldeletion
XLOC_024289	TCONS_00045693	TCONS_00045690	2563	0.384488	-54	internaldeletion
XLOC_024291	TCONS_00045701	TCONS_00045700	0	0	34	UTR3insertion
XLOC_024291	TCONS_00045701	TCONS_00045700	0	0	-20	UTR3deletion
XLOC_024298	TCONS_00045720	TCONS_00045722	546	0.572928	12	internalinsertion
XLOC_024355	TCONS_00045854	TCONS_00045857	0	0	33	UTR3insertion
XLOC_024355	TCONS_00045854	TCONS_00045857	466	0.947154	36	internalinsertion
XLOC_024355	TCONS_00045854	TCONS_00045857	466	0.947154	-26	internaldeletion
XLOC_024484	TCONS_00046118	TCONS_00046117	0	0	93	UTR3insertion
XLOC_024484	TCONS_00046118	TCONS_00046117	0	0	-53	UTR3deletion
XLOC_024484	TCONS_00046118	TCONS_00046117	884	0.43017	-83	internaldeletion
XLOC_024574	TCONS_00046310	TCONS_00046311	170	0.0760286	212	internalinsertion
XLOC_024574	TCONS_00046310	TCONS_00046311	937	0.419052	-1	internaldeletion
XLOC_024578	TCONS_00046318	TCONS_00046319	447	0.296026	245	internalinsertion
XLOC_024578	TCONS_00046318	TCONS_00046319	447	0.296026	-1063	internaldeletion
XLOC_024634	TCONS_00046458	TCONS_00046453	401	0.560056	6	internalinsertion
XLOC_024634	TCONS_00046458	TCONS_00046453	676	0.944134	3801	internalinsertion
XLOC_024634	TCONS_00046458	TCONS_00046453	555	0.77514	-33	internaldeletion
XLOC_024634	TCONS_00046458	TCONS_00046453	676	0.944134	-40	internaldeletion
XLOC_024648	TCONS_00046497	TCONS_00046500	0	0	10	UTR3insertion
XLOC_024648	TCONS_00046497	TCONS_00046500	4013	1	3	UTR5insertion
XLOC_024648	TCONS_00046497	TCONS_00046500	1870	0.465986	-1	internaldeletion
XLOC_024656	TCONS_00046515	TCONS_00046514	1655	1	1	UTR5insertion
XLOC_024656	TCONS_00046515	TCONS_00046514	1121	0.677341	-1	internaldeletion
XLOC_024665	TCONS_00046536	TCONS_00046535	1027	0.36213	-342	internaldeletion
XLOC_024689	TCONS_00046581	TCONS_00046583	0	0	66	UTR3insertion
XLOC_024689	TCONS_00046581	TCONS_00046583	3395	1	1166	UTR5insertion
XLOC_024689	TCONS_00046581	TCONS_00046583	124	0.0365243	-137	internaldeletion
XLOC_024693	TCONS_00046595	TCONS_00046593	0	0	76	UTR3insertion
XLOC_024693	TCONS_00046595	TCONS_00046593	609	0.925532	1310	internalinsertion
XLOC_024693	TCONS_00046595	TCONS_00046593	0	0	-411	UTR3deletion
XLOC_024693	TCONS_00046595	TCONS_00046593	609	0.925532	-49	internaldeletion
XLOC_024713	TCONS_00046648	TCONS_00046651	0	0	32	UTR3insertion
XLOC_024713	TCONS_00046648	TCONS_00046651	1058	0.107118	-1	internaldeletion
XLOC_024713	TCONS_00046648	TCONS_00046651	5423	0.549053	-120	internaldeletion
XLOC_024724	TCONS_00046675	TCONS_00046673	2676	1	83	UTR5insertion
XLOC_024724	TCONS_00046675	TCONS_00046673	942	0.352018	-75	internaldeletion
XLOC_024736	TCONS_00046724	TCONS_00046725	358	0.112015	-144	internaldeletion
XLOC_024749	TCONS_00046757	TCONS_00046759	0	0	445	UTR3insertion
XLOC_024749	TCONS_00046757	TCONS_00046759	4064	1	37	UTR5insertion
XLOC_024749	TCONS_00046757	TCONS_00046759	3435	0.845226	-165	internaldeletion
XLOC_024754	TCONS_00046773	TCONS_00046777	0	0	93	UTR3insertion
XLOC_024754	TCONS_00046773	TCONS_00046777	336	0.74833	3845	internalinsertion
XLOC_024754	TCONS_00046773	TCONS_00046777	0	0	-28	UTR3deletion
XLOC_024754	TCONS_00046773	TCONS_00046777	336	0.74833	-113	internaldeletion
XLOC_024775	TCONS_00046824	TCONS_00046826	321	0.647177	347	internalinsertion
XLOC_024775	TCONS_00046824	TCONS_00046826	321	0.647177	-175	internaldeletion
XLOC_025023	TCONS_00047328	TCONS_00047326	0	0	1655	UTR3insertion
XLOC_025023	TCONS_00047328	TCONS_00047326	0	0	-32	UTR3deletion
XLOC_025023	TCONS_00047328	TCONS_00047326	2165	0.810254	-288	internaldeletion
XLOC_025023	TCONS_00047328	TCONS_00047326	2669	0.998877	-3	internaldeletion
XLOC_025074	TCONS_00047439	TCONS_00047440	0	0	60	UTR3insertion
XLOC_025074	TCONS_00047439	TCONS_00047440	1410	0.79258	392	internalinsertion
XLOC_025074	TCONS_00047439	TCONS_00047440	0	0	-326	UTR3deletion
XLOC_025074	TCONS_00047439	TCONS_00047440	1410	0.79258	-369	internaldeletion
XLOC_025126	TCONS_00047541	TCONS_00047540	1465	0.590488	63	internalinsertion
XLOC_025126	TCONS_00047541	TCONS_00047540	0	0	-1451	UTR3deletion
XLOC_025126	TCONS_00047541	TCONS_00047540	1465	0.590488	-1016	internaldeletion
XLOC_025150	TCONS_00047592	TCONS_00047593	2508	0.95036	-9	internaldeletion
XLOC_025175	TCONS_00047636	TCONS_00047637	0	0	17	UTR3insertion
XLOC_025175	TCONS_00047636	TCONS_00047637	1189	0.872981	98	internalinsertion
XLOC_025175	TCONS_00047636	TCONS_00047637	1189	0.872981	-173	internaldeletion
XLOC_025179	TCONS_00047654	TCONS_00047644	0	0	6424	UTR3insertion
XLOC_025179	TCONS_00047654	TCONS_00047644	3232	0.912221	143	internalinsertion
XLOC_025179	TCONS_00047654	TCONS_00047644	3543	1	38	UTR5insertion
XLOC_025179	TCONS_00047654	TCONS_00047644	0	0	-1478	UTR3deletion
XLOC_025227	TCONS_00047712	TCONS_00047711	3108	0.935581	29	internalinsertion
XLOC_025227	TCONS_00047712	TCONS_00047711	2586	0.778447	-1	internaldeletion
XLOC_025227	TCONS_00047712	TCONS_00047711	3108	0.935581	-214	internaldeletion
XLOC_025238	TCONS_00047740	TCONS_00047742	1446	0.533776	-269	internaldeletion
XLOC_025238	TCONS_00047740	TCONS_00047742	2445	0.902547	-264	internaldeletion
XLOC_025244	TCONS_00047757	TCONS_00047758	2219	0.809263	42	internalinsertion
XLOC_025265	TCONS_00047807	TCONS_00047809	0	0	237	UTR3insertion
XLOC_025265	TCONS_00047807	TCONS_00047809	813	0.641673	-249	internaldeletion
XLOC_025280	TCONS_00047847	TCONS_00047849	0	0	3164	UTR3insertion
XLOC_025280	TCONS_00047847	TCONS_00047849	166	0.608059	2161	internalinsertion
XLOC_025280	TCONS_00047847	TCONS_00047849	0	0	-92	UTR3deletion
XLOC_025280	TCONS_00047847	TCONS_00047849	166	0.608059	-107	internaldeletion
XLOC_025284	TCONS_00047856	TCONS_00047858	0	0	56	UTR3insertion
XLOC_025284	TCONS_00047856	TCONS_00047858	6124	1	3	UTR5insertion
XLOC_025284	TCONS_00047856	TCONS_00047858	2265	0.369856	-2	internaldeletion
XLOC_025284	TCONS_00047856	TCONS_00047858	2455	0.400882	-2019	internaldeletion
XLOC_025291	TCONS_00047873	TCONS_00047875	0	0	133	UTR3insertion
XLOC_025291	TCONS_00047873	TCONS_00047875	834	0.89485	25	internalinsertion
XLOC_025291	TCONS_00047873	TCONS_00047875	834	0.89485	-98	internaldeletion
XLOC_025296	TCONS_00047886	TCONS_00047885	0	0	31	UTR3insertion
XLOC_025296	TCONS_00047886	TCONS_00047885	4802	0.963483	177	internalinsertion
XLOC_025296	TCONS_00047886	TCONS_00047885	0	0	-4437	UTR3deletion
XLOC_025296	TCONS_00047886	TCONS_00047885	4802	0.963483	-2	internaldeletion
XLOC_025296	TCONS_00047886	TCONS_00047885	4976	0.998395	-8	internaldeletion
XLOC_025369	TCONS_00048046	TCONS_00048045	1159	0.79931	-126	internaldeletion
XLOC_025418	TCONS_00048149	TCONS_00048147	0	0	368	UTR3insertion
XLOC_025418	TCONS_00048149	TCONS_00048147	418	1	25	UTR5insertion
XLOC_025418	TCONS_00048149	TCONS_00048147	0	0	-137	UTR3deletion
XLOC_025576	TCONS_00048473	TCONS_00048468	1352	0.832512	46	internalinsertion
XLOC_025576	TCONS_00048473	TCONS_00048468	1508	0.928571	304	internalinsertion
XLOC_025576	TCONS_00048473	TCONS_00048468	1560	0.960591	94	internalinsertion
XLOC_025576	TCONS_00048473	TCONS_00048468	1560	0.960591	-64	internaldeletion
XLOC_025576	TCONS_00048476	TCONS_00048468	1352	0.832512	85	internalinsertion
XLOC_025576	TCONS_00048476	TCONS_00048468	1508	0.928571	304	internalinsertion
XLOC_025576	TCONS_00048476	TCONS_00048468	1560	0.960591	94	internalinsertion
XLOC_025576	TCONS_00048476	TCONS_00048468	1560	0.960591	-64	internaldeletion
XLOC_025593	TCONS_00048507	TCONS_00048508	0	0	40	UTR3insertion
XLOC_025593	TCONS_00048507	TCONS_00048508	1033	0.939091	41	internalinsertion
XLOC_025593	TCONS_00048507	TCONS_00048508	1033	0.939091	-67	internaldeletion
XLOC_025596	TCONS_00048518	TCONS_00048519	4258	0.932341	-75	internaldeletion
XLOC_026106	TCONS_00049097	TCONS_00049099	0	0	92	UTR3insertion
XLOC_026110	TCONS_00049109	TCONS_00049108	0	0	71	UTR3insertion
XLOC_026110	TCONS_00049109	TCONS_00049108	0	0	-1642	UTR3deletion
XLOC_026110	TCONS_00049109	TCONS_00049108	1657	0.570396	-1248	internaldeletion
XLOC_026211	TCONS_00049276	TCONS_00049272	2888	0.62161	183	internalinsertion
XLOC_026211	TCONS_00049276	TCONS_00049272	0	0	-178	UTR3deletion
XLOC_026211	TCONS_00049276	TCONS_00049272	573	0.123332	-241	internaldeletion
XLOC_026217	TCONS_00049289	TCONS_00049288	0	0	20	UTR3insertion
XLOC_026217	TCONS_00049289	TCONS_00049288	2515	1	3828	UTR5insertion
XLOC_026217	TCONS_00049289	TCONS_00049288	0	0	-1677	UTR3deletion
XLOC_026254	TCONS_00049366	TCONS_00049367	0	0	194	UTR3insertion
XLOC_026254	TCONS_00049366	TCONS_00049367	488	1	268	UTR5insertion
XLOC_026262	TCONS_00049382	TCONS_00049381	0	0	64	UTR3insertion
XLOC_026262	TCONS_00049382	TCONS_00049381	0	0	-610	UTR3deletion
XLOC_026262	TCONS_00049382	TCONS_00049381	621	0.175078	-2926	internaldeletion
XLOC_026345	TCONS_00049515	TCONS_00049514	0	0	79	UTR3insertion
XLOC_026345	TCONS_00049515	TCONS_00049514	3352	1	973	UTR5insertion
XLOC_026345	TCONS_00049515	TCONS_00049514	0	0	-54	UTR3deletion
XLOC_026348	TCONS_00049524	TCONS_00049526	0	0	738	UTR3insertion
XLOC_026348	TCONS_00049524	TCONS_00049526	3126	0.580717	3	internalinsertion
XLOC_026348	TCONS_00049524	TCONS_00049526	4404	0.818131	2	internalinsertion
XLOC_026348	TCONS_00049524	TCONS_00049526	0	0	-24	UTR3deletion
XLOC_026348	TCONS_00049524	TCONS_00049526	3985	0.740294	-3	internaldeletion
XLOC_026403	TCONS_00049625	TCONS_00049626	0	0	10	UTR3insertion
XLOC_026403	TCONS_00049625	TCONS_00049626	505	0.25964	3	internalinsertion
XLOC_026403	TCONS_00049625	TCONS_00049626	1945	1	9	UTR5insertion
XLOC_026411	TCONS_00049648	TCONS_00049649	970	0.674079	10	internalinsertion
XLOC_026411	TCONS_00049648	TCONS_00049649	970	0.674079	-4	internaldeletion
XLOC_026411	TCONS_00049648	TCONS_00049649	1305	0.90688	-14	internaldeletion
XLOC_026417	TCONS_00049663	TCONS_00049664	0	0	123	UTR3insertion
XLOC_026417	TCONS_00049663	TCONS_00049664	0	0	-129	UTR3deletion
XLOC_026417	TCONS_00049663	TCONS_00049664	1150	0.99395	-7	internaldeletion
XLOC_026434	TCONS_00049688	TCONS_00049689	0	0	26	UTR3insertion
XLOC_026434	TCONS_00049688	TCONS_00049689	3300	1	1	UTR5insertion
XLOC_026434	TCONS_00049688	TCONS_00049689	90	0.0272727	-36	internaldeletion
XLOC_026467	TCONS_00049742	TCONS_00049743	1603	0.466124	-147	internaldeletion
XLOC_026472	TCONS_00049756	TCONS_00049758	0	0	1	UTR3insertion
XLOC_026472	TCONS_00049756	TCONS_00049758	330	0.348469	-87	internaldeletion
XLOC_026472	TCONS_00049757	TCONS_00049758	0	0	1	UTR3insertion
XLOC_026472	TCONS_00049757	TCONS_00049758	604	0.637804	249	internalinsertion
XLOC_026472	TCONS_00049757	TCONS_00049758	330	0.348469	-87	internaldeletion
XLOC_026472	TCONS_00049757	TCONS_00049758	604	0.637804	-343	internaldeletion
XLOC_026479	TCONS_00049776	TCONS_00049774	0	0	655	UTR3insertion
XLOC_026479	TCONS_00049776	TCONS_00049774	0	0	-40	UTR3deletion
XLOC_026479	TCONS_00049776	TCONS_00049774	135	0.141361	-820	internaldeletion
XLOC_026544	TCONS_00049921	TCONS_00049919	0	0	58	UTR3insertion
XLOC_026544	TCONS_00049921	TCONS_00049919	1752	1	67	UTR5insertion
XLOC_026544	TCONS_00049921	TCONS_00049919	0	0	-23	UTR3deletion
XLOC_026552	TCONS_00049951	TCONS_00049950	0	0	-22	UTR3deletion
XLOC_026552	TCONS_00049951	TCONS_00049950	283	0.0808803	-796	internaldeletion
XLOC_026552	TCONS_00049951	TCONS_00049950	1842	0.526436	-856	internaldeletion
XLOC_026559	TCONS_00049972	TCONS_00049971	0	0	197	UTR3insertion
XLOC_026559	TCONS_00049972	TCONS_00049971	0	0	-262	UTR3deletion
XLOC_026559	TCONS_00049972	TCONS_00049971	634	0.862585	-101	internaldeletion
XLOC_026567	TCONS_00049993	TCONS_00049992	0	0	-1569	UTR3deletion
XLOC_026610	TCONS_00050109	TCONS_00050107	0	0	-46	UTR3deletion
XLOC_026610	TCONS_00050109	TCONS_00050107	76	0.00947513	-3	internaldeletion
XLOC_026661	TCONS_00050220	TCONS_00050221	4872	0.388424	-54	internaldeletion
XLOC_026661	TCONS_00050220	TCONS_00050221	5963	0.475405	-6	internaldeletion
XLOC_026772	TCONS_00050495	TCONS_00050493	0	0	-6051	UTR3deletion
XLOC_026772	TCONS_00050495	TCONS_00050493	6056	0.724922	-1	internaldeletion
XLOC_026791	TCONS_00050552	TCONS_00050549	1172	1	803	UTR5insertion
XLOC_027013	TCONS_00050935	TCONS_00050933	3619	1	51	UTR5insertion
XLOC_027013	TCONS_00050935	TCONS_00050933	2811	0.776734	-39	internaldeletion
XLOC_027015	TCONS_00050940	TCONS_00050939	0	0	-8	UTR3deletion
XLOC_027015	TCONS_00050940	TCONS_00050939	667	0.293962	-787	internaldeletion
XLOC_027099	TCONS_00051102	TCONS_00051109	0	0	99	UTR3insertion
XLOC_027099	TCONS_00051102	TCONS_00051109	187	0.0887518	157	internalinsertion
XLOC_027099	TCONS_00051102	TCONS_00051109	1416	0.672046	369	internalinsertion
XLOC_027099	TCONS_00051102	TCONS_00051109	187	0.0887518	-93	internaldeletion
XLOC_027099	TCONS_00051102	TCONS_00051109	1269	0.602278	-47	internaldeletion
XLOC_027099	TCONS_00051102	TCONS_00051109	1416	0.672046	-691	internaldeletion
XLOC_027283	TCONS_00051461	TCONS_00051460	0	0	1010	UTR3insertion
XLOC_027283	TCONS_00051461	TCONS_00051460	0	0	-927	UTR3deletion
XLOC_027339	TCONS_00051558	TCONS_00051557	1180	0.684455	838	internalinsertion
XLOC_027339	TCONS_00051558	TCONS_00051557	1180	0.684455	-544	internaldeletion
XLOC_027530	TCONS_00051908	TCONS_00051909	1403	0.165409	81	internalinsertion
XLOC_027530	TCONS_00051908	TCONS_00051909	5209	0.614124	-191	internaldeletion
XLOC_027531	TCONS_00051915	TCONS_00051920	0	0	6593	UTR3insertion
XLOC_027531	TCONS_00051915	TCONS_00051920	0	0	-2122	UTR3deletion
XLOC_027537	TCONS_00051936	TCONS_00051937	0	0	868	UTR3insertion
XLOC_027537	TCONS_00051936	TCONS_00051937	0	0	-1317	UTR3deletion
XLOC_027553	TCONS_00051975	TCONS_00051977	0	0	98	UTR3insertion
XLOC_027553	TCONS_00051975	TCONS_00051977	2526	0.942186	90	internalinsertion
XLOC_027553	TCONS_00051975	TCONS_00051977	2526	0.942186	-155	internaldeletion
XLOC_027602	TCONS_00052072	TCONS_00052073	2630	0.897305	-148	internaldeletion
XLOC_027602	TCONS_00052072	TCONS_00052073	2812	0.9594	-119	internaldeletion
XLOC_027629	TCONS_00052119	TCONS_00052120	416	0.121495	-30	internaldeletion
XLOC_027644	TCONS_00052159	TCONS_00052160	1335	0.918789	-9	internaldeletion
XLOC_027648	TCONS_00052168	TCONS_00052167	82	1	46	UTR5insertion
XLOC_027648	TCONS_00052168	TCONS_00052167	0	0	-54	UTR3deletion
XLOC_027657	TCONS_00052187	TCONS_00052190	0	0	58	UTR3insertion
XLOC_027657	TCONS_00052187	TCONS_00052190	1046	0.853181	102	internalinsertion
XLOC_027657	TCONS_00052187	TCONS_00052190	1046	0.853181	-180	internaldeletion
XLOC_027685	TCONS_00052257	TCONS_00052258	419	0.660883	-6	internaldeletion
XLOC_027685	TCONS_00052257	TCONS_00052258	604	0.952681	-30	internaldeletion
XLOC_027769	TCONS_00052401	TCONS_00052403	0	0	2	UTR3insertion
XLOC_027769	TCONS_00052401	TCONS_00052403	1769	0.604167	37	internalinsertion
XLOC_027769	TCONS_00052401	TCONS_00052403	1769	0.604167	-1159	internaldeletion
XLOC_027871	TCONS_00052605	TCONS_00052607	2821	0.967089	226	internalinsertion
XLOC_027871	TCONS_00052605	TCONS_00052607	1917	0.657182	-99	internaldeletion
XLOC_027871	TCONS_00052605	TCONS_00052607	2821	0.967089	-96	internaldeletion
XLOC_027887	TCONS_00052639	TCONS_00052640	913	0.833029	26	internalinsertion
XLOC_027889	TCONS_00052644	TCONS_00052643	155	0.559567	30	internalinsertion
XLOC_027889	TCONS_00052644	TCONS_00052643	0	0	-79	UTR3deletion
XLOC_027889	TCONS_00052644	TCONS_00052643	155	0.559567	-122	internaldeletion
XLOC_027905	TCONS_00052697	TCONS_00052699	2033	0.912068	44	internalinsertion
XLOC_027905	TCONS_00052697	TCONS_00052699	2033	0.912068	-9	internaldeletion
XLOC_027929	TCONS_00052755	TCONS_00052749	909	0.906281	482	internalinsertion
XLOC_027929	TCONS_00052755	TCONS_00052749	909	0.906281	-94	internaldeletion
XLOC_028054	TCONS_00052933	TCONS_00052934	2449	0.86202	-73	internaldeletion
XLOC_028054	TCONS_00052933	TCONS_00052934	2796	0.984161	-45	internaldeletion
XLOC_028080	TCONS_00052973	TCONS_00052975	1248	0.55442	-1	internaldeletion
XLOC_028080	TCONS_00052973	TCONS_00052975	2205	0.979565	-46	internaldeletion
XLOC_028080	TCONS_00052974	TCONS_00052975	995	0.442026	-1	internaldeletion
XLOC_028080	TCONS_00052974	TCONS_00052975	2242	0.996002	-9	internaldeletion
XLOC_028087	TCONS_00052999	TCONS_00052995	0	0	136	UTR3insertion
XLOC_028087	TCONS_00052999	TCONS_00052995	2625	0.974749	937	internalinsertion
XLOC_028087	TCONS_00052999	TCONS_00052995	0	0	-1476	UTR3deletion
XLOC_028087	TCONS_00052999	TCONS_00052995	2625	0.974749	-68	internaldeletion
XLOC_028112	TCONS_00053065	TCONS_00053057	7425	0.715801	3	internalinsertion
XLOC_028112	TCONS_00053065	TCONS_00053057	7626	0.735178	3	internalinsertion
XLOC_028112	TCONS_00053065	TCONS_00053057	8476	0.817121	68	internalinsertion
XLOC_028112	TCONS_00053065	TCONS_00053057	0	0	-471	UTR3deletion
XLOC_028112	TCONS_00053065	TCONS_00053057	8476	0.817121	-1897	internaldeletion
XLOC_028166	TCONS_00053167	TCONS_00053168	0	0	150	UTR3insertion
XLOC_028166	TCONS_00053167	TCONS_00053168	360	1	3	UTR5insertion
XLOC_028166	TCONS_00053167	TCONS_00053168	0	0	-331	UTR3deletion
XLOC_028173	TCONS_00053184	TCONS_00053185	0	0	35	UTR3insertion
XLOC_028173	TCONS_00053184	TCONS_00053185	326	0.628131	350	internalinsertion
XLOC_028173	TCONS_00053184	TCONS_00053185	0	0	-188	UTR3deletion
XLOC_028173	TCONS_00053184	TCONS_00053185	326	0.628131	-193	internaldeletion
XLOC_028174	TCONS_00053190	TCONS_00053186	3746	0.99153	526	internalinsertion
XLOC_028174	TCONS_00053190	TCONS_00053186	510	0.134992	-233	internaldeletion
XLOC_028174	TCONS_00053190	TCONS_00053186	903	0.239015	-54	internaldeletion
XLOC_028174	TCONS_00053190	TCONS_00053186	3746	0.99153	-32	internaldeletion
XLOC_028225	TCONS_00053308	TCONS_00053307	2052	0.79289	66	internalinsertion
XLOC_028225	TCONS_00053308	TCONS_00053307	0	0	-2051	UTR3deletion
XLOC_028225	TCONS_00053308	TCONS_00053307	2052	0.79289	-536	internaldeletion
XLOC_028260	TCONS_00053382	TCONS_00053381	0	0	20	UTR3insertion
XLOC_028260	TCONS_00053382	TCONS_00053381	0	0	-1221	UTR3deletion
XLOC_028266	TCONS_00053392	TCONS_00053394	0	0	312	UTR3insertion
XLOC_028266	TCONS_00053392	TCONS_00053394	1611	0.966407	2427	internalinsertion
XLOC_028266	TCONS_00053392	TCONS_00053394	735	0.440912	-4	internaldeletion
XLOC_028266	TCONS_00053392	TCONS_00053394	1611	0.966407	-56	internaldeletion
XLOC_028346	TCONS_00053547	TCONS_00053548	1867	0.709616	-118	internaldeletion
XLOC_028346	TCONS_00053547	TCONS_00053548	2387	0.90726	-61	internaldeletion
XLOC_028353	TCONS_00053573	TCONS_00053570	1377	0.477462	50	internalinsertion
XLOC_028353	TCONS_00053573	TCONS_00053570	0	0	-25	UTR3deletion
XLOC_028871	TCONS_00054104	TCONS_00054107	0	0	342	UTR3insertion
XLOC_028871	TCONS_00054104	TCONS_00054107	0	0	-328	UTR3deletion
XLOC_028871	TCONS_00054104	TCONS_00054107	3532	0.99774	-8	internaldeletion
XLOC_028871	TCONS_00054105	TCONS_00054107	0	0	294	UTR3insertion
XLOC_028871	TCONS_00054105	TCONS_00054107	0	0	-328	UTR3deletion
XLOC_028871	TCONS_00054105	TCONS_00054107	3532	0.99774	-8	internaldeletion
XLOC_028964	TCONS_00054284	TCONS_00054283	281	0.0566532	-126	internaldeletion
XLOC_028964	TCONS_00054285	TCONS_00054283	281	0.0566532	4	internalinsertion
XLOC_028986	TCONS_00054329	TCONS_00054330	1733	0.490796	-90	internaldeletion
XLOC_028992	TCONS_00054347	TCONS_00054342	0	0	3603	UTR3insertion
XLOC_028992	TCONS_00054347	TCONS_00054342	0	0	-4123	UTR3deletion
XLOC_028998	TCONS_00054369	TCONS_00054374	0	0	4001	UTR3insertion
XLOC_028998	TCONS_00054369	TCONS_00054374	0	0	-1817	UTR3deletion
XLOC_029009	TCONS_00054395	TCONS_00054394	0	0	108	UTR3insertion
XLOC_029009	TCONS_00054395	TCONS_00054394	0	0	-82	UTR3deletion
XLOC_029009	TCONS_00054395	TCONS_00054394	137	0.0145281	-9293	internaldeletion
XLOC_029159	TCONS_00054711	TCONS_00054716	0	0	3528	UTR3insertion
XLOC_029159	TCONS_00054711	TCONS_00054716	0	0	-181	UTR3deletion
XLOC_029216	TCONS_00054826	TCONS_00054829	0	0	119	UTR3insertion
XLOC_029216	TCONS_00054826	TCONS_00054829	3451	0.42147	379	internalinsertion
XLOC_029216	TCONS_00054826	TCONS_00054829	8188	1	128	UTR5insertion
XLOC_029229	TCONS_00054853	TCONS_00054861	0	0	4525	UTR3insertion
XLOC_029229	TCONS_00054853	TCONS_00054861	0	0	-374	UTR3deletion
XLOC_029233	TCONS_00054874	TCONS_00054873	0	0	30	UTR3insertion
XLOC_029233	TCONS_00054874	TCONS_00054873	359	0.18013	191	internalinsertion
XLOC_029233	TCONS_00054874	TCONS_00054873	0	0	-133	UTR3deletion
XLOC_029269	TCONS_00054971	TCONS_00054972	0	0	48	UTR3insertion
XLOC_029269	TCONS_00054971	TCONS_00054972	163	0.261218	-4	internaldeletion
XLOC_029314	TCONS_00055049	TCONS_00055048	0	0	78	UTR3insertion
XLOC_029314	TCONS_00055049	TCONS_00055048	868	1	90	UTR5insertion
XLOC_029314	TCONS_00055049	TCONS_00055048	0	0	-489	UTR3deletion
XLOC_029339	TCONS_00055106	TCONS_00055108	0	0	161	UTR3insertion
XLOC_029339	TCONS_00055106	TCONS_00055108	1993	1	3644	UTR5insertion
XLOC_029343	TCONS_00055121	TCONS_00055122	0	0	410	UTR3insertion
XLOC_029343	TCONS_00055121	TCONS_00055122	2082	1	104	UTR5insertion
XLOC_029343	TCONS_00055121	TCONS_00055122	0	0	-87	UTR3deletion
XLOC_029377	TCONS_00055196	TCONS_00055200	429	0.0319125	-54	internaldeletion
XLOC_029377	TCONS_00055196	TCONS_00055200	609	0.0453024	-62	internaldeletion
XLOC_029400	TCONS_00055260	TCONS_00055261	0	0	44	UTR3insertion
XLOC_029400	TCONS_00055260	TCONS_00055261	2904	1	4650	UTR5insertion
XLOC_029444	TCONS_00055374	TCONS_00055375	1349	0.345632	-223	internaldeletion
XLOC_029500	TCONS_00055500	TCONS_00055501	0	0	26	UTR3insertion
XLOC_029500	TCONS_00055500	TCONS_00055501	557	0.756793	1003	internalinsertion
XLOC_029500	TCONS_00055500	TCONS_00055501	557	0.756793	-179	internaldeletion
XLOC_029557	TCONS_00055628	TCONS_00055630	698	0.436796	84	internalinsertion
XLOC_029557	TCONS_00055628	TCONS_00055630	1438	0.899875	76	internalinsertion
XLOC_029557	TCONS_00055628	TCONS_00055630	345	0.215895	-126	internaldeletion
XLOC_029557	TCONS_00055628	TCONS_00055630	1438	0.899875	-160	internaldeletion
XLOC_029621	TCONS_00055756	TCONS_00055758	0	0	402	UTR3insertion
XLOC_029621	TCONS_00055756	TCONS_00055758	2227	0.960328	83	internalinsertion
XLOC_029621	TCONS_00055756	TCONS_00055758	2227	0.960328	-92	internaldeletion
XLOC_029693	TCONS_00055903	TCONS_00055901	8944	0.967756	1523	internalinsertion
XLOC_029693	TCONS_00055903	TCONS_00055901	8944	0.967756	-298	internaldeletion
XLOC_029738	TCONS_00056002	TCONS_00056003	2348	0.953696	99	internalinsertion
XLOC_029738	TCONS_00056002	TCONS_00056003	2348	0.953696	-114	internaldeletion
XLOC_029746	TCONS_00056030	TCONS_00056029	6267	0.837946	-313	internaldeletion
XLOC_029747	TCONS_00056033	TCONS_00056031	3599	0.985487	395	internalinsertion
XLOC_029747	TCONS_00056033	TCONS_00056031	3599	0.985487	-53	internaldeletion
XLOC_029772	TCONS_00056077	TCONS_00056076	1178	0.705389	-3	internaldeletion
XLOC_029864	TCONS_00056254	TCONS_00056256	0	0	1084	UTR3insertion
XLOC_029864	TCONS_00056254	TCONS_00056256	0	0	-82	UTR3deletion
XLOC_029872	TCONS_00056273	TCONS_00056274	0	0	46	UTR3insertion
XLOC_029872	TCONS_00056273	TCONS_00056274	5839	0.837853	-74	internaldeletion
XLOC_029889	TCONS_00056306	TCONS_00056304	578	0.923323	2368	internalinsertion
XLOC_029889	TCONS_00056306	TCONS_00056304	578	0.923323	-48	internaldeletion
XLOC_029903	TCONS_00056348	TCONS_00056347	1035	0.123361	-135	internaldeletion
XLOC_029903	TCONS_00056348	TCONS_00056347	5752	0.685578	-3	internaldeletion
XLOC_029903	TCONS_00056348	TCONS_00056347	7871	0.938141	-6	internaldeletion
XLOC_029921	TCONS_00056386	TCONS_00056385	4882	0.934175	1736	internalinsertion
XLOC_029921	TCONS_00056386	TCONS_00056385	4882	0.934175	-344	internaldeletion
XLOC_029922	TCONS_00056391	TCONS_00056390	0	0	-2297	UTR3deletion
XLOC_029922	TCONS_00056391	TCONS_00056390	2394	0.901016	-263	internaldeletion
XLOC_029948	TCONS_00056440	TCONS_00056444	0	0	1119	UTR3insertion
XLOC_029948	TCONS_00056440	TCONS_00056444	2104	1	353	UTR5insertion
XLOC_029948	TCONS_00056440	TCONS_00056444	0	0	-97	UTR3deletion
XLOC_029948	TCONS_00056440	TCONS_00056444	1419	0.67443	-208	internaldeletion
XLOC_029971	TCONS_00056483	TCONS_00056484	5121	0.773565	-5	internaldeletion
XLOC_030016	TCONS_00056587	TCONS_00056583	456	0.319328	782	internalinsertion
XLOC_030016	TCONS_00056587	TCONS_00056583	1118	0.782913	114	internalinsertion
XLOC_030016	TCONS_00056587	TCONS_00056583	1428	1	6	UTR5insertion
XLOC_030016	TCONS_00056587	TCONS_00056583	913	0.639356	-91	internaldeletion
XLOC_030016	TCONS_00056587	TCONS_00056583	1118	0.782913	-114	internaldeletion
XLOC_030059	TCONS_00056686	TCONS_00056685	3431	1	6	UTR5insertion
XLOC_030059	TCONS_00056686	TCONS_00056685	2678	0.78053	-104	internaldeletion
XLOC_030061	TCONS_00056700	TCONS_00056699	1522	1	43	UTR5insertion
XLOC_030061	TCONS_00056700	TCONS_00056699	359	0.235874	-57	internaldeletion
XLOC_030611	TCONS_00057295	TCONS_00057296	329	0.617261	310	internalinsertion
XLOC_030611	TCONS_00057295	TCONS_00057296	329	0.617261	-204	internaldeletion
XLOC_030617	TCONS_00057326	TCONS_00057323	1384	0.39074	139	internalinsertion
XLOC_030617	TCONS_00057326	TCONS_00057323	2731	0.771033	337	internalinsertion
XLOC_030617	TCONS_00057326	TCONS_00057323	1384	0.39074	-139	internaldeletion
XLOC_030617	TCONS_00057326	TCONS_00057323	2731	0.771033	-811	internaldeletion
XLOC_030653	TCONS_00057416	TCONS_00057418	0	0	3408	UTR3insertion
XLOC_030653	TCONS_00057416	TCONS_00057418	0	0	-5161	UTR3deletion
XLOC_030779	TCONS_00057610	TCONS_00057609	1210	0.768742	631	internalinsertion
XLOC_030779	TCONS_00057610	TCONS_00057609	1210	0.768742	-364	internaldeletion
XLOC_030808	TCONS_00057672	TCONS_00057670	0	0	40	UTR3insertion
XLOC_030808	TCONS_00057672	TCONS_00057670	0	0	-154	UTR3deletion
XLOC_030808	TCONS_00057672	TCONS_00057670	1024	0.233417	-84	internaldeletion
XLOC_030894	TCONS_00057866	TCONS_00057869	0	0	282	UTR3insertion
XLOC_030894	TCONS_00057866	TCONS_00057869	1431	0.581707	167	internalinsertion
XLOC_030894	TCONS_00057866	TCONS_00057869	0	0	-278	UTR3deletion
XLOC_030894	TCONS_00057866	TCONS_00057869	1431	0.581707	-167	internaldeletion
XLOC_030894	TCONS_00057866	TCONS_00057869	2428	0.986992	-32	internaldeletion
XLOC_030895	TCONS_00057875	TCONS_00057874	0	0	-34	UTR3deletion
XLOC_030895	TCONS_00057875	TCONS_00057874	608	0.050917	-647	internaldeletion
XLOC_030946	TCONS_00057977	TCONS_00057979	0	0	53	UTR3insertion
XLOC_030946	TCONS_00057977	TCONS_00057979	2736	0.679077	-167	internaldeletion
XLOC_030989	TCONS_00058064	TCONS_00058066	0	0	1023	UTR3insertion
XLOC_030989	TCONS_00058064	TCONS_00058066	0	0	-150	UTR3deletion
XLOC_031093	TCONS_00058277	TCONS_00058278	0	0	86	UTR3insertion
XLOC_031093	TCONS_00058277	TCONS_00058278	0	0	-63	UTR3deletion
XLOC_031111	TCONS_00058316	TCONS_00058318	0	0	26	UTR3insertion
XLOC_031111	TCONS_00058316	TCONS_00058318	5392	1	2435	UTR5insertion
XLOC_031111	TCONS_00058316	TCONS_00058318	0	0	-116	UTR3deletion
XLOC_031162	TCONS_00058449	TCONS_00058456	0	0	17	UTR3insertion
XLOC_031162	TCONS_00058449	TCONS_00058456	2964	0.533477	114	internalinsertion
XLOC_031162	TCONS_00058449	TCONS_00058456	5556	1	22	UTR5insertion
XLOC_031162	TCONS_00058449	TCONS_00058456	2964	0.533477	-93	internaldeletion
XLOC_031162	TCONS_00058453	TCONS_00058456	0	0	17	UTR3insertion
XLOC_031162	TCONS_00058453	TCONS_00058456	5556	1	22	UTR5insertion
XLOC_031162	TCONS_00058453	TCONS_00058456	2964	0.533477	-93	internaldeletion
XLOC_031182	TCONS_00058498	TCONS_00058496	0	0	189	UTR3insertion
XLOC_031182	TCONS_00058498	TCONS_00058496	3215	1	102	UTR5insertion
XLOC_031182	TCONS_00058498	TCONS_00058496	0	0	-581	UTR3deletion
XLOC_031188	TCONS_00058511	TCONS_00058516	923	0.146508	-1	internaldeletion
XLOC_031188	TCONS_00058517	TCONS_00058516	2132	0.338413	42	internalinsertion
XLOC_031188	TCONS_00058517	TCONS_00058516	2620	0.415873	24	internalinsertion
XLOC_031188	TCONS_00058517	TCONS_00058516	2929	0.464921	2	internalinsertion
XLOC_031188	TCONS_00058521	TCONS_00058516	0	0	181	UTR3insertion
XLOC_031188	TCONS_00058521	TCONS_00058516	2132	0.338413	42	internalinsertion
XLOC_031188	TCONS_00058521	TCONS_00058516	2620	0.415873	24	internalinsertion
XLOC_031188	TCONS_00058521	TCONS_00058516	0	0	-923	UTR3deletion
XLOC_031198	TCONS_00058548	TCONS_00058543	0	0	518	UTR3insertion
XLOC_031198	TCONS_00058548	TCONS_00058543	0	0	-909	UTR3deletion
XLOC_031228	TCONS_00058617	TCONS_00058614	0	0	48	UTR3insertion
XLOC_031228	TCONS_00058617	TCONS_00058614	4885	1	202	UTR5insertion
XLOC_031228	TCONS_00058617	TCONS_00058614	0	0	-833	UTR3deletion
XLOC_031228	TCONS_00058617	TCONS_00058614	2037	0.416991	-63	internaldeletion
XLOC_031326	TCONS_00058830	TCONS_00058832	0	0	31	UTR3insertion
XLOC_031326	TCONS_00058830	TCONS_00058832	3898	0.811407	-164	internaldeletion
XLOC_031350	TCONS_00058887	TCONS_00058890	0	0	2416	UTR3insertion
XLOC_031350	TCONS_00058887	TCONS_00058890	0	0	-1665	UTR3deletion
XLOC_031360	TCONS_00058910	TCONS_00058911	1202	0.333056	-4	internaldeletion
XLOC_031404	TCONS_00058997	TCONS_00058998	3623	0.97655	58	internalinsertion
XLOC_031404	TCONS_00058997	TCONS_00058998	3651	0.984097	-59	internaldeletion
XLOC_031447	TCONS_00059060	TCONS_00059059	1710	0.973804	187	internalinsertion
XLOC_031447	TCONS_00059060	TCONS_00059059	1074	0.611617	-84	internaldeletion
XLOC_031447	TCONS_00059060	TCONS_00059059	1710	0.973804	-46	internaldeletion
XLOC_031476	TCONS_00059117	TCONS_00059119	5011	0.917598	29	internalinsertion
XLOC_031476	TCONS_00059117	TCONS_00059119	2474	0.453031	-141	internaldeletion
XLOC_031476	TCONS_00059117	TCONS_00059119	5011	0.917598	-450	internaldeletion
XLOC_031490	TCONS_00059146	TCONS_00059147	4915	0.684254	-1659	internaldeletion
XLOC_031490	TCONS_00059146	TCONS_00059147	7147	0.994988	-36	internaldeletion
XLOC_031534	TCONS_00059246	TCONS_00059245	620	0.880682	518	internalinsertion
XLOC_031534	TCONS_00059246	TCONS_00059245	620	0.880682	-84	internaldeletion
XLOC_031563	TCONS_00059321	TCONS_00059322	0	0	617	UTR3insertion
XLOC_031577	TCONS_00059348	TCONS_00059351	0	0	9	UTR3insertion
XLOC_031577	TCONS_00059348	TCONS_00059351	2555	1	82	UTR5insertion
XLOC_031577	TCONS_00059348	TCONS_00059351	552	0.216047	-1	internaldeletion
XLOC_031577	TCONS_00059348	TCONS_00059351	1735	0.679061	-108	internaldeletion
XLOC_031585	TCONS_00059372	TCONS_00059374	0	0	28	UTR3insertion
XLOC_031585	TCONS_00059372	TCONS_00059374	4501	0.616153	32	internalinsertion
XLOC_031585	TCONS_00059372	TCONS_00059374	4501	0.616153	-2804	internaldeletion
XLOC_031597	TCONS_00059402	TCONS_00059403	0	0	221	UTR3insertion
XLOC_031597	TCONS_00059402	TCONS_00059403	2752	1	50	UTR5insertion
XLOC_031597	TCONS_00059402	TCONS_00059403	0	0	-1872	UTR3deletion
XLOC_031597	TCONS_00059402	TCONS_00059403	2021	0.734375	-529	internaldeletion
XLOC_031610	TCONS_00059424	TCONS_00059426	0	0	963	UTR3insertion
XLOC_031610	TCONS_00059424	TCONS_00059426	3855	1	49	UTR5insertion
XLOC_031614	TCONS_00059437	TCONS_00059436	0	0	59	UTR3insertion
XLOC_031614	TCONS_00059437	TCONS_00059436	556	0.16479	87	internalinsertion
XLOC_031614	TCONS_00059437	TCONS_00059436	3374	1	35	UTR5insertion
XLOC_031614	TCONS_00059437	TCONS_00059436	0	0	-458	UTR3deletion
XLOC_031614	TCONS_00059437	TCONS_00059436	556	0.16479	-171	internaldeletion
XLOC_031627	TCONS_00059462	TCONS_00059463	8486	0.988468	91	internalinsertion
XLOC_031627	TCONS_00059462	TCONS_00059463	8486	0.988468	-99	internaldeletion
XLOC_031637	TCONS_00059490	TCONS_00059491	4342	0.913913	-13	internaldeletion
XLOC_031656	TCONS_00059552	TCONS_00059548	0	0	376	UTR3insertion
XLOC_031656	TCONS_00059552	TCONS_00059548	0	0	-598	UTR3deletion
XLOC_031656	TCONS_00059552	TCONS_00059548	667	0.516254	-224	internaldeletion
XLOC_031656	TCONS_00059552	TCONS_00059548	982	0.760062	-24	internaldeletion
XLOC_031733	TCONS_00059712	TCONS_00059710	0	0	49	UTR3insertion
XLOC_031733	TCONS_00059712	TCONS_00059710	0	0	-2442	UTR3deletion
XLOC_031738	TCONS_00059720	TCONS_00059719	619	0.43317	4	internalinsertion
XLOC_031738	TCONS_00059720	TCONS_00059719	0	0	-188	UTR3deletion
XLOC_031776	TCONS_00059796	TCONS_00059801	0	0	6	UTR3insertion
XLOC_031776	TCONS_00059796	TCONS_00059801	2212	0.666466	713	internalinsertion
XLOC_031776	TCONS_00059796	TCONS_00059801	2592	0.780958	591	internalinsertion
XLOC_031788	TCONS_00059819	TCONS_00059818	1744	0.698159	127	internalinsertion
XLOC_031812	TCONS_00059882	TCONS_00059883	1560	0.71103	-94	internaldeletion
XLOC_032378	TCONS_00060626	TCONS_00060622	0	0	400	UTR3insertion
XLOC_032378	TCONS_00060626	TCONS_00060622	0	0	-37	UTR3deletion
XLOC_032441	TCONS_00060732	TCONS_00060731	0	0	17	UTR3insertion
XLOC_032441	TCONS_00060732	TCONS_00060731	0	0	-211	UTR3deletion
XLOC_032602	TCONS_00060989	TCONS_00060990	0	0	115	UTR3insertion
XLOC_032602	TCONS_00060989	TCONS_00060990	164	0.239067	3	internalinsertion
XLOC_032602	TCONS_00060989	TCONS_00060990	445	0.648688	14	internalinsertion
XLOC_032602	TCONS_00060989	TCONS_00060990	686	1	33	UTR5insertion
XLOC_032609	TCONS_00061007	TCONS_00061005	0	0	32	UTR3insertion
XLOC_032609	TCONS_00061007	TCONS_00061005	1851	1	1	UTR5insertion
XLOC_032609	TCONS_00061007	TCONS_00061005	0	0	-920	UTR3deletion
XLOC_032662	TCONS_00061109	TCONS_00061108	1765	0.497744	22	internalinsertion
XLOC_032786	TCONS_00061333	TCONS_00061334	0	0	74	UTR3insertion
XLOC_032786	TCONS_00061333	TCONS_00061334	802	1	7	UTR5insertion
XLOC_032786	TCONS_00061333	TCONS_00061334	0	0	-114	UTR3deletion
XLOC_032786	TCONS_00061333	TCONS_00061334	519	0.647132	-45	internaldeletion
XLOC_032832	TCONS_00061424	TCONS_00061422	0	0	17	UTR3insertion
XLOC_032832	TCONS_00061424	TCONS_00061422	0	0	-201	UTR3deletion
XLOC_032859	TCONS_00061484	TCONS_00061478	0	0	266	UTR3insertion
XLOC_032859	TCONS_00061484	TCONS_00061478	1054	1	630	UTR5insertion
XLOC_032859	TCONS_00061484	TCONS_00061478	0	0	-341	UTR3deletion
XLOC_032931	TCONS_00061632	TCONS_00061633	2492	0.710174	-6	internaldeletion
XLOC_032931	TCONS_00061632	TCONS_00061633	2582	0.735822	-8	internaldeletion
XLOC_032933	TCONS_00061637	TCONS_00061636	0	0	-88	UTR3deletion
XLOC_033070	TCONS_00061915	TCONS_00061913	0	0	-143	UTR3deletion
XLOC_033070	TCONS_00061915	TCONS_00061913	242	0.0808553	-2751	internaldeletion
XLOC_033088	TCONS_00061948	TCONS_00061949	0	0	49	UTR3insertion
XLOC_033088	TCONS_00061948	TCONS_00061949	2191	0.922138	3	internalinsertion
XLOC_033164	TCONS_00062060	TCONS_00062059	0	0	88	UTR3insertion
XLOC_033164	TCONS_00062060	TCONS_00062059	0	0	-71	UTR3deletion
XLOC_033184	TCONS_00062100	TCONS_00062099	3014	0.962324	237	internalinsertion
XLOC_033184	TCONS_00062100	TCONS_00062099	3014	0.962324	-118	internaldeletion
XLOC_033199	TCONS_00062124	TCONS_00062123	2573	0.972779	125	internalinsertion
XLOC_033199	TCONS_00062124	TCONS_00062123	2573	0.972779	-72	internaldeletion
XLOC_033245	TCONS_00062205	TCONS_00062201	0	0	1282	UTR3insertion
XLOC_033245	TCONS_00062205	TCONS_00062201	0	0	-19	UTR3deletion
XLOC_033245	TCONS_00062205	TCONS_00062201	795	0.187899	-21	internaldeletion
XLOC_033332	TCONS_00062359	TCONS_00062354	1628	0.874798	94	internalinsertion
XLOC_033332	TCONS_00062359	TCONS_00062354	1628	0.874798	-233	internaldeletion
XLOC_033337	TCONS_00062369	TCONS_00062368	1366	1	1	UTR5insertion
XLOC_033337	TCONS_00062369	TCONS_00062368	597	0.437042	-12	internaldeletion
XLOC_033363	TCONS_00062419	TCONS_00062422	0	0	399	UTR3insertion
XLOC_033363	TCONS_00062419	TCONS_00062422	414	1	592	UTR5insertion
