# Supplementary material
Source: publisher figshare collection journal article supplement (https://plos.figshare.com/articles/dataset/_/1259769)
Supplement: Supplementary file 1 [file 1 › Table_S5.xls]

## Sheet: Sheet1
Table S5. RANBP9-bound target mRNA transcripts identified by RIP-Seq.
	Transcript_ID	Gene Symbol	Locus	Fold change enrichment
1	NM_001001152	Zfp458	chr13:67355853-67370004	2.80432
2	NM_001001187	Zfp738	chr13:67768377-67784449	2.14664
3	NM_001001334	BC061194	chr2:18620648-18671232	2.84045
4	NM_001001335	Plekha8	chr6:54545104-54595816	2.02771
5	NM_001001445	Trpv1	chr11:73051760-73074009	5.84863
6	NM_001001447	Zscan22	chr7:13483163-13493588	3.94175
7	NM_001001447	Zscan22	chr7:13483163-13493588	3.94175
8	NM_001001735	Whsc1l1	chr8:26712777-26830139	2.66248
9	NM_001001738	Itprip	chr19:47969085-47993789	3.57968
10	NM_001001882	Rtel1	chr2:181054428-181091321	3.5449
11	NM_001001983	Pi4ka	chr16:17280443-17430919	4.6634
12	NM_001001986	8430427H17Rik	chr2:153233196-153355707	5.1653
13	NM_001002004	2610507B11Rik	chr11:78075255-78104127	4.89603
14	NM_001002012	Hspa2	chr12:77505162-77507923	2.51571
15	NM_001002787	Ccin	chr4:43996375-43998405	3.61596
16	NM_001002894	Nlrp14	chr7:114310503-114341617	2.07096
17	NM_001002927	Penk	chr4:4060682-4065592	2.38867
18	NM_001003909	Ankib1	chr5:3689999-3803109	2.11361
19	NM_001003910	BC030307	chr10:86168555-86239588	2.58406
20	NM_001003912	Arhgef11	chr3:87422672-87552545	3.90637
21	NM_001003917	Atg9a	chr1:75177439-75188497	4.10479
22	NM_001003950	Rab3ip	chr10:116342839-116387436	2.844
23	NM_001004164	Gnptab	chr10:87842156-87910074	2.08153
24	NM_001004366	Scube3	chr17:28279470-28308290	4.07129
25	NM_001005420	Ppp1r26	chr2:28303460-28311028	2.09833
26	NM_001005867	Zmiz2	chr11:6289366-6306165	3.8451
27	NM_001007463	Spag8	chr4:43664600-43666424	2.08352
28	NM_001007575	Zfp58	chr13:67591102-67601458	2.60372
29	NM_001007580	Fndc3c1	chrX:103615381-103680568	3.62596
30	NM_001008233	Plekhn1	chr4:155595564-155602651	3.98042
31	NM_001008424	Cdsn	chr17:35689072-35694125	2.70048
32	NM_001008550	Zfyve26	chr12:80333333-80397269	3.93085
33	NM_001008973	Tmem232	chr17:65605344-65890122	2.61836
34	NM_001009545	Adam6b	chr12:114727775-114730046	3.67586
35	NM_001010833	Mdc1	chr17:35978442-35996615	2.55115
36	NM_001011818	Olfr316	chr11:58571168-58572089	5.71823
37	NM_001012638	Acd	chr8:108214805-108224995	2.50053
38	NM_001013026	Ttf2	chr3:100742782-100773586	2.31229
39	NM_001013368	E2f8	chr7:56121798-56136411	2.50829
40	NM_001013382	Lrrc52	chr1:169375805-169396911	2.20705
41	NM_001013414	Neurl4	chr11:69715379-69727324	2.82133
42	NM_001013750	Gm597	chr1:28832966-28837097	2.04751
43	NM_001013753	Pcdh17	chr14:84843369-84936867	3.23327
44	NM_001013767	Capn11	chr17:45767152-45796258	2.73625
45	NM_001014390	Dyrk2	chr10:118296404-118305959	2.05078
46	NM_001014974	Ttll4	chr1:74708327-74744547	3.08906
47	NM_001014976	Espl1	chr15:102126723-102154787	2.99672
48	NM_001014981	Wdr7	chr18:63868348-64149413	2.54467
49	NM_001015507	Vprbp	chr9:106724306-106783323	2.22694
50	NM_001015889	Taf9	chr13:101421297-101436368	2.27694
51	NM_001017419	Tbata	chr10:60634711-60651589	2.69492
52	NM_001017433	Tbata	chr10:60634711-60651589	2.95653
53	NM_001017955	Zscan18	chr7:13353440-13361007	2.33902
54	NM_001017985	C2cd3	chr7:107520742-107618668	3.31233
55	NM_001024137	Pla2g4d	chr2:120091604-120114805	2.48584
56	NM_001024512	Fam149b	chr14:21167383-21202713	3.74242
57	NM_001024604	Ankrd28	chr14:32513200-32643601	2.41619
58	NM_001024617	Inpp4b	chr8:84239098-84646460	2.74824
59	NM_001024624	Cdkl5	chrX:157205944-157432613	3.27658
60	NM_001024917	N4bp2	chr5:66154759-66218023	2.18971
61	NM_001024918	Rfx4	chr10:84218792-84369283	3.90664
62	NM_001024920	Trp53i13	chr11:77321600-77326775	3.04703
63	NM_001024922	Ddx49	chr8:72806897-72826351	2.61541
64	NM_001024928	Zfp667	chr7:6238181-6259485	2.20021
65	NM_001024952	Rc3h1	chr1:162836541-162905107	2.6879
66	NM_001025085	Gm5797	chr14:8156501-8164909	2.62309
67	NM_001025246	Trp53i11	chr2:93027740-93041914	2.20657
68	NM_001025309	Pja2	chr17:64630354-64681223	2.89553
69	NM_001025365	Miip	chr4:147234886-147242828	2.71072
70	NM_001025391	Sufu	chr19:46471407-46561150	2.27937
71	NM_001025432	Crebbp	chr16:4084047-4213404	2.52357
72	NM_001025559	Sox6	chr7:122614857-123182258	3.92752
73	NM_001025590	Kcnj6	chr16:94970289-95219303	2.89938
74	NM_001029876	Urb2	chr8:126547372-126572404	2.97246
75	NM_001029889	Gm608	chr16:44173509-44227578	3.4253
76	NM_001029929	Zmynd15	chr11:70267735-70279701	2.02388
77	NM_001029934	Usp32	chr11:84797989-84953457	2.61816
78	NM_001029936	Specc1	chr11:61890598-62036515	3.24784
79	NM_001029983	Man1b1	chr2:25188262-25207733	2.0923
80	NM_001031621	Abca17	chr17:24401223-24484197	4.08096
81	NM_001031814	Smg1	chr7:125274825-125387151	4.48406
82	NM_001032727	Sybu	chr15:44503402-44637375	2.55988
83	NM_001033040	Gm166	chr7:134716861-134732109	2.51747
84	NM_001033128	Bbs1	chr19:4886881-4906627	2.09836
85	NM_001033150	Plekhm2	chr4:141181648-141220030	2.85
86	NM_001033172	Rab11fip2	chr19:59978786-60019557	2.08811
87	NM_001033173	Usp31	chr7:128785534-128850767	2.25013
88	NM_001033175	Cln6	chr9:62686593-62723724	2.87132
89	NM_001033176	1700039E15Rik	chr7:52538242-52544363	5.03565
90	NM_001033191	Naa11	chr5:97811227-97821349	2.96853
91	NM_001033196	Znfx1	chr2:166861296-166891362	3.98311
92	NM_001033201	Ncbp1	chr4:46151382-46185274	2.26774
93	NM_001033202	Usp30	chr5:114550341-114572933	2.39656
94	NM_001033206	Pwwp2b	chr7:146434380-146453152	2.57579
95	NM_001033228	Itga1	chr13:115748288-115892172	2.61765
96	NM_001033243	Ccdc114	chr7:53183767-53204326	2.16898
97	NM_001033244	Fancd2	chr6:113481675-113546279	3.4042
98	NM_001033252	Gm732	chrX:105141073-105143775	2.42897
99	NM_001033267	Qrich2	chr11:116302638-116315661	3.90363
100	NM_001033276	Mll2	chr15:98662099-98701636	3.36364
101	NM_001033285	Cdc42bpa	chr1:181891219-182126151	2.80548
102	NM_001033291	Usp40	chr1:89841695-89905126	3.04718
103	NM_001033298	Plk1s1	chr2:146681624-146795825	2.89794
104	NM_001033304	5330417C22Rik	chr3:108260986-108339440	5.15521
105	NM_001033321	Tmem231	chr8:114435917-114457691	2.92848
106	NM_001033338	Rimbp3	chr16:17208227-17214075	5.65917
107	NM_001033348	Ralgapa2	chr2:146067034-146337740	2.71859
108	NM_001033379	Dcp1b	chr6:118542313-119171632	3.51469
109	NM_001033425	Zscan10	chr17:23737822-23747986	2.70135
110	NM_001033434	Gm884	chr11:103395890-103476053	4.2253
111	NM_001033436	Atxn7l1	chr12:33987379-34053142	4.06748
112	NM_001033436	Atxn7l1	chr12:33987379-34053142	4.06748
113	NM_001033436	Atxn7l1	chr12:33987379-34053142	4.06748
114	NM_001033461	Lrrc43	chr5:123939333-123958213	2.57196
115	NM_001033471	Cpxcr1	chrX:113562552-113592392	2.6544
116	NM_001033474	Atxn7l3b	chr10:112362483-112366082	2.12426
117	NM_001033532	AW554918	chr18:25327520-25625822	2.05111
118	NM_001033536	Rfx7	chr9:72380046-72470756	2.28622
119	NM_001033550	Lrrc8b	chr5:105844793-105915208	3.91575
120	NM_001033668	Dnahc1	chr14:32073560-32137082	4.32636
121	NM_001033669	Fbxw10	chr11:62660624-62690964	5.52058
122	NM_001033766	4930596D02Rik	chr14:36622671-36625164	2.44326
123	NM_001033775	4933422H20Rik	chr11:115301858-115309582	3.86863
124	NM_001033874	Ak8	chr2:28555680-28668685	3.18055
125	NM_001033877	Adamts17	chr7:73984620-74297511	2.71195
126	NM_001034085	Ppp2r1b	chr9:50665039-50817178	3.01437
127	NM_001034858	Armc2	chr10:41634796-41738188	2.72578
128	NM_001034858	Armc2	chr10:41634796-41738188	2.72578
129	NM_001034878	Dnaic2	chr11:114588725-114619200	2.49503
130	NM_001034893	Zfp936	chr7:50432957-50447479	3.25465
131	NM_001035231	Zfp748	chr13:67639589-67654088	3.42071
132	NM_001035854	Ap2b1	chr11:83116198-83218535	4.00858
133	NM_001037749	Slc22a14	chr9:119078573-119099511	2.6749
134	NM_001037755	Baiap2	chr11:119804405-119868096	3.76474
135	NM_001037762	Zdhhc12	chr2:29934285-29949155	2.26369
136	NM_001037927	Wdr93	chr7:86888048-86930836	2.37081
137	NM_001038010	Kat2a	chr11:100566059-100573781	2.10298
138	NM_001038625	Sertad2	chr11:20443255-20553026	3.21259
139	NM_001038627	Smurf1	chr5:145637363-145726699	2.36826
140	NM_001038643	Slco3a1	chr7:81420303-81699666	2.12203
141	NM_001038695	Kdm3a	chr6:71538965-71582899	2.33523
142	NM_001039089	Sel1l	chr12:93044482-93087597	4.49338
143	NM_001039114	Acsbg2	chr17:56982526-57013870	3.2812
144	NM_001039126	Asb1	chr1:93437141-93456167	3.55497
145	NM_001039139	Camk2g	chr14:21554096-21613310	2.0023
146	NM_001039147	Morf4l1	chr9:89986506-90009658	2.32131
147	NM_001039153	Tctn1	chr5:122659745-122714469	2.98643
148	NM_001039184	Cep350	chr1:157692093-157820385	2.57505
149	NM_001039231	Zfp951	chr5:105242186-105289087	3.57571
150	NM_001039244	Gm7120	chr13:120276063-120284312	2.41211
151	NM_001039363	Tsc2	chr17:24686894-24769574	4.68419
152	NM_001039466	Trim46	chr3:89038098-89049819	2.32504
153	NM_001039472	Kif21b	chr1:138027977-138074591	3.18754
154	NM_001039495	Ccdc108	chr1:74948653-74982173	3.44285
155	NM_001039507	Lipe	chr7:26164545-26351436	4.09615
156	NM_001039520	Dnm2	chr9:21229351-21314630	4.44591
157	NM_001039533	Pdxdc1	chr16:13819369-13903228	3.46173
158	NM_001039700	Pkd1l3	chr8:112138416-112217194	3.44407
159	NM_001039878	Strn4	chr7:17394615-17426280	2.51124
160	NM_001039939	Asxl1	chr2:153171874-153229743	3.65778
161	NM_001040136	Pdzd9	chr7:127778702-127813857	2.06091
162	NM_001040435	Tacc3	chr5:34000795-34014846	2.67409
163	NM_001040682	Clmn	chr12:106001323-106103286	3.3829
164	NM_001040683	Med15	chr16:17651313-17723023	2.75672
165	NM_001042420	Cabyr	chr18:12899863-12913651	3.41787
166	NM_001042542	Akap4	chrX:6644644-6655732	5.1585
167	NM_001042557	Map2k7	chr8:4238739-4247897	4.9049
168	NM_001042591	Arrdc3	chr13:81022682-81035303	2.5156
169	NM_001042591	Arrdc3	chr13:81022682-81035303	2.5156
170	NM_001042623	Phc1	chr6:122267748-122287033	3.8446
171	NM_001042707	Ilf3	chr9:21172446-21216164	2.06585
172	NM_001042715	Ccdc135	chr8:97579002-97602041	2.91133
173	NM_001044704	Zscan21	chr5:138558132-138575487	2.23108
174	NM_001044718	Zfp41	chr15:75447114-75455725	3.84389
175	NM_001045483	Mapk1ip1	chr7:146027500-146037950	3.56207
176	NM_001045486	Zfp180	chr7:24866962-24892234	3.89941
177	NM_001045514	Akna	chr4:63028161-63064479	3.74605
178	NM_001045514	Akna	chr4:63028161-63064479	3.74605
179	NM_001045527	Hsf5	chr11:87430665-87473044	5.24339
180	NM_001045536	Zzef1	chr11:72609727-72740622	2.76571
181	NM_001045543	Gm11435	chr11:83325237-83335677	2.20471
182	NM_001045807	Rbm15	chr3:107129027-107136207	2.24266
183	NM_001048189	Agbl4	chr4:110070395-111330115	4.10894
184	NM_001048192	Agbl5	chr5:31191224-31210161	4.11359
185	NM_001048207	Gypc	chr18:32687973-32719688	2.39956
186	NM_001077264	Ap2a1	chr7:52151448-52184860	3.63672
187	NM_001077360	Git2	chr5:115177416-115223501	4.21662
188	NM_001077514	Slc1a2	chr2:102498839-102630941	3.19722
189	NM_001077514	Slc1a2	chr2:102498839-102630941	3.19722
190	NM_001077595	Shroom3	chr5:93112460-93394785	3.26329
191	NM_001077695	Ncoa2	chr1:13129239-13364164	3.04631
192	NM_001077698	Fmnl1	chr11:103032451-103060214	2.88287
193	NM_001079873	Brdt	chr5:107760212-107816077	2.73893
194	NM_001080390	Mark2	chr19:7349885-7416334	2.16786
195	NM_001080552	Gsg1	chr6:135187347-135204354	2.33668
196	NM_001080553	Gsg1	chr6:135187347-135204354	4.14216
197	NM_001080748	Gtf2i	chr5:134713703-134790616	2.63507
198	NM_001080749	Gtf2i	chr5:134713703-134790616	3.21711
199	NM_001080754	Ambra1	chr2:91570294-91759006	3.22972
200	NM_001080793	Ash2l	chr8:26927341-26958142	2.16945
201	NM_001080818	Cdc14a	chr3:115975470-116126950	3.23649
202	NM_001080819	Arid1a	chr4:133234922-133309526	3.97682
203	NM_001080924	Znrf3	chr11:5176331-5344850	2.99036
204	NM_001080930	Atxn1l	chr8:112250350-112261639	3.76021
205	NM_001080931	Med13	chr11:86079216-86171027	3.10007
206	NM_001080932	Foxk2	chr11:121121300-121171210	3.30382
207	NM_001080964	Sp2	chr11:96805459-96839002	2.38463
208	NM_001080995	4632434I11Rik	chr7:100006036-100022742	2.76497
209	NM_001080999	Trmt2a	chr16:18248975-18289261	2.18082
210	NM_001081011	Srgap2	chr1:133181827-133423938	2.92757
211	NM_001081022	D430042O09Rik	chr7:132851389-133018311	4.3315
212	NM_001081038	Btbd16	chr7:137917582-137969413	4.41241
213	NM_001081043	Ptpn23	chr9:110287592-110310714	2.60785
214	NM_001081046	Efcab3	chr11:104953532-104978851	2.62025
215	NM_001081057	Tecpr2	chr12:112127473-112210604	3.12353
216	NM_001081066	Dennd3	chr15:73342989-73402672	4.28303
217	NM_001081068	Ltn1	chr16:87376895-87432851	3.39097
218	NM_001081083	Armc3	chr2:19120744-19231861	2.70693
219	NM_001081096	Fam154a	chr4:86090601-86204207	2.76814
220	NM_001081104	Chrna9	chr5:66358362-66368725	2.48344
221	NM_001081109	Lmtk2	chr5:144861304-144949073	2.59855
222	NM_001081117	Mki67	chr7:142881470-142908062	2.8228
223	NM_001081118	Phrf1	chr7:148414686-148448650	2.50433
224	NM_001081121	4931429I11Rik	chr9:40702931-40772195	3.19173
225	NM_001081122	Cep63	chr9:102488907-102528454	2.06677
226	NM_001081133	Kif16b	chr2:142444080-142727200	2.26978
227	NM_001081134	Kcng1	chr2:168087197-168094831	3.8861
228	NM_001081152	Npat	chr9:53345151-53383732	2.73851
229	NM_001081197	Apobec4	chr1:154597680-154604674	2.84218
230	NM_001081203	Sbno1	chr5:124818710-124875923	2.19004
231	NM_001081217	Zfp174	chr16:3847222-3858880	2.87523
232	NM_001081219	Myo1a	chr10:127142311-127157996	2.26959
233	NM_001081223	Rbbp8	chr18:11791784-11901716	3.72713
234	NM_001081242	Tln2	chr9:67064891-67407510	4.60529
235	NM_001081247	Polr3a	chr14:25267915-25306268	2.08439
236	NM_001081254	Fam186b	chr15:99101448-99117611	2.87657
237	NM_001081284	Gm12695	chr4:96390577-96451851	2.19889
238	NM_001081293	Rprd2	chr3:95563795-95622876	3.76664
239	NM_001081298	Lphn2	chr3:148478549-148617599	2.34177
240	NM_001081315	Brpf3	chr17:28938070-28975734	2.31492
241	NM_001081321	Pds5a	chr5:66006498-66089095	2.34341
242	NM_001081330	Dnahc2	chr11:69234310-69362610	4.47056
243	NM_001081336	Dgkh	chr14:78969415-79124896	3.22279
244	NM_001081337	Sipa1l2	chr8:127941962-128016610	2.46507
245	NM_001081344	Stxbp5	chr10:9475344-9620838	2.51065
246	NM_001081348	Hecw1	chr13:14318704-14615493	2.4502
247	NM_001081348	Hecw1	chr13:14318704-14615493	2.4502
248	NM_001081352	Ttc37	chr13:76236181-76325431	3.1526
249	NM_001081355	Prdm2	chr4:142697293-142802612	3.47471
250	NM_001081360	Camsap2	chr1:138164699-138242681	2.87387
251	NM_001081362	Trrap	chr5:145529660-145620642	2.23789
252	NM_001081373	Cep164	chr9:45575028-45636721	4.09025
253	NM_001081376	Chd5	chr4:151712759-151764303	4.40542
254	NM_001081395	Amotl1	chr9:14346410-14419444	3.76634
255	NM_001081407	Plb1	chr5:32535080-32666729	3.7471
256	NM_001081423	Ttll5	chr12:87165899-87394710	4.58567
257	NM_001081445	Ncam1	chr9:49310250-49607174	4.72376
258	NM_001081457	Ppp2r5c	chr12:111685388-111821271	3.49004
259	NM_001081567	Mapk10	chr5:103336966-103640353	2.06777
260	NM_001081633	Dgcr14	chr16:17900801-17911441	2.4615
261	NM_001081682	Gnb1l	chr16:18498860-18566772	3.82471
262	NM_001081963	9430020K01Rik	chr18:4634926-4682867	3.6703
263	NM_001081982	Nfix	chr8:87231497-87324239	2.68255
264	NM_001082476	Ndor1	chr2:25100332-25110934	4.21269
265	NM_001082536	Mkl1	chr15:80808194-81021187	6.56825
266	NM_001083110	Pja1	chrX:96661072-96666074	3.5081
267	NM_001083317	Slc35a4	chr18:36830812-36843516	2.43062
268	NM_001083319	Ubp1	chr9:113840051-113935869	2.15972
269	NM_001083618	Ttll9	chr2:152788220-152834218	2.9999
270	NM_001083921	Rbck1	chr2:152142069-152158375	2.50001
271	NM_001083945	Rsph3b	chr17:7109064-7152705	4.0232
272	NM_001085440	Smcr8	chr11:60591026-60601789	3.05481
273	NM_001085495	Arfgef2	chr2:166631080-166723551	4.68584
274	NM_001085498	Chmp6	chr11:119775123-119780866	2.29998
275	NM_001085523	Gm14374	chrX:5246184-5248144	3.9984
276	NM_001085543	Gm14347	chrX:3907010-3908970	4.16851
277	NM_001085554	Gm10922	chrX:3993613-3995573	3.9112
278	NM_001085555	Tcp11	chr17:28203691-28217584	3.2563
279	NM_001099275	Tekt5	chr16:10361346-10395541	2.55542
280	NM_001099277	Zfp541	chr7:16657290-16681677	4.25796
281	NM_001099288	Arhgap44	chr11:64792536-64976463	3.84335
282	NM_001099333	Gm2863	chrX:31349046-31350997	3.50978
283	NM_001099688	Fbxo39	chr11:72127945-72132921	2.40885
284	NM_001099917	2210404O07Rik	chr10:80855808-80857824	2.46439
285	NM_001100460	Zbtb42	chr12:113917050-113920958	3.20416
286	NM_001102430	Arfgef1	chr1:10127587-10222751	2.87705
287	NM_001103181	Tulp4	chr17:6106829-6240637	4.94467
288	NM_001104646	AW209491	chr13:14722511-14730469	2.09581
289	NM_001105557	Zfp938	chr10:81687601-81704020	2.12375
290	NM_001110131	Cic	chr7:26067197-26079167	2.46104
291	NM_001110163	Pde4dip	chr3:97493751-97692630	4.29692
292	NM_001110193	Inpp5d	chr1:89516886-89617083	3.93848
293	NM_001110201	Yif1b	chr7:30023341-30033486	3.06994
294	NM_001110218	Ppm1h	chr10:122115817-122382849	2.10338
295	NM_001110218	Ppm1h	chr10:122115817-122382849	2.10338
296	NM_001110253	Fyco1	chr9:123698627-123761020	3.16017
297	NM_001110274	Slc14a2	chr18:78342882-78793689	3.11713
298	NM_001110274	Slc14a2	chr18:78342882-78793689	3.11713
299	NM_001110305	Keap1	chr9:21034173-21043776	4.55087
300	NM_001110307	Keap1	chr9:21034173-21043776	2.14406
301	NM_001110351	Sin3a	chr9:56919846-56976175	2.58951
302	NM_001111016	Nav2	chr7:56214442-56865458	4.03727
303	NM_001111080	Uhrf1	chr17:56442759-56462909	2.60471
304	NM_001111268	Grik2	chr10:48819268-49508560	2.23573
305	NM_001111289	Caprin1	chr2:103603101-103637797	2.78508
306	NM_001112721	Ubr5	chr15:37897082-38008608	3.63459
307	NM_001113346	Gatad2a	chr8:72430967-72520278	2.09196
308	NM_001113351	Synj2	chr17:5941279-6079739	3.00813
309	NM_001113351	Synj2	chr17:5941279-6079739	3.00813
310	NM_001113362	Tbc1d14	chr5:36833252-36928875	3.31485
311	NM_001113384	Gnao1	chr8:96334737-96493288	3.06848
312	NM_001113384	Gnao1	chr8:96334737-96493288	3.06848
313	NM_001113423	Slain2	chr5:73305555-73370067	2.20039
314	NM_001113517	Arhgef7	chr8:11728104-11835217	3.55525
315	NM_001113554	Nudcd1	chr15:44206772-44269231	2.50499
316	NM_001114131	Ppp4r1	chr17:66132694-66191266	2.62233
317	NM_001114140	Tcf20	chr15:82639054-82742564	3.23787
318	NM_001114174	Fam189a2	chr19:24047239-24105509	2.40634
319	NM_001114311	Stox2	chr8:48265401-48437702	2.60955
320	NM_001114545	Ksr2	chr5:117864010-118217997	3.42248
321	NM_001114595	Ehbp1l1	chr19:5707373-5726317	2.00114
322	NM_001115074	Gm101	chr1:121820095-121891787	2.58546
323	NM_001115076	Camsap1	chr2:25782357-25838802	4.76127
324	NM_001115150	Uspl1	chr5:149996135-150027010	3.9002
325	NM_001122667	Mkl2	chr16:13256573-13417622	2.57796
326	NM_001122675	Zcchc2	chr1:107886982-107930654	4.41025
327	NM_001122676	Zcchc2	chr1:107886982-107930654	3.17133
328	NM_001122685	Rhbdd1	chr1:82313153-82441941	3.60235
329	NM_001122765	Sirt2	chr7:29551770-29573684	4.13436
330	NM_001122780	Klhl25	chr7:82993223-83019016	2.53258
331	NM_001123327	Qser1	chr2:104594953-104656853	2.74999
332	NM_001126046	Fam178b	chr1:36619540-36740028	5.21793
333	NM_001126487	Heatr8	chr4:106353021-106400535	3.78955
334	NM_001126488	Tex28	chrX:71396282-71413177	2.12486
335	NM_001127355	Eif2b4	chr5:31489930-31495512	2.68152
336	NM_001127363	Inpp5a	chr7:146575007-146768696	2.63826
337	NM_001128151	Cecr2	chr6:120616438-120721209	2.59553
338	NM_001128597	Gpank1	chr17:35258440-35261760	2.63591
339	NM_001128609	Dedd	chr1:173259275-173275776	2.16253
340	NM_001130163	Oxr1	chr15:41279027-41692593	2.46588
341	NM_001130169	Zfp207	chr11:80196780-80219375	2.01617
342	NM_001130457	Tbrg4	chr11:6515600-6526070	2.80716
343	NM_001130529	Zkscan17	chr11:59299022-59324569	3.92096
344	NM_001130868	Kars	chr8:114517339-114535205	3.65913
345	NM_001134384	Iqsec1	chr6:90609591-90760117	4.05724
346	NM_001134386	Gpr160	chr3:30754871-30796114	2.59137
347	NM_001134733	CK137956	chr4:127604835-127648085	2.33415
348	NM_001134767	Ccdc62	chr5:124380697-124419904	2.30435
349	NM_001135657	Ptprj	chr2:90269912-90420804	4.9722
350	NM_001136060	Dpp6	chr5:27143896-28054040	2.24969
351	NM_001136064	Bscl2	chr19:8911418-8923173	5.16996
352	NM_001136069	Ldha	chr7:54101173-54110997	3.64669
353	NM_001136070	Eif2d	chr1:133049783-133070048	2.71441
354	NM_001136081	Ssrp1	chr2:84877357-84887268	2.69866
355	NM_001136086	Dpysl3	chr18:43483880-43552985	3.92668
356	NM_001136104	Abl2	chr1:158488917-158579750	2.17675
357	NM_001141925	Bean1	chr8:106694412-106742997	2.95662
358	NM_001142357	Alg12	chr15:88635672-88649748	3.30788
359	NM_001142728	Lrrc9	chr12:73542852-73611552	4.11729
360	NM_001142781	Fam188b	chr6:55153376-55270216	3.45432
361	NM_001142948	Pogk	chr1:168309297-168339959	2.83308
362	NM_001142952	Fam46c	chr3:100275458-100293115	3.12399
363	NM_001143765	Syce1	chr7:147963127-147973753	3.31719
364	NM_001143849	Pde2a	chr7:108570204-108661343	2.89973
365	NM_001145637	Gm1661	chr4:116885937-116924522	2.10405
366	NM_001145676	2210408I21Rik	chr13:77274796-77752940	2.58723
367	NM_001145759	4930571K23Rik	chr7:132512374-132514527	3.11389
368	NM_001145802	Mak	chr13:41120488-41175075	3.31454
369	NM_001145807	Fam5c	chr1:148342795-148749602	4.14952
370	NM_001145832	Kifc3	chr8:97605100-97666440	3.01154
371	NM_001145836	Ralgds	chr2:28368686-28408602	4.37731
372	NM_001145947	Bace1	chr9:45646611-45670567	4.0213
373	NM_001145948	Ttc39a	chr4:109079704-109117350	3.93143
374	NM_001145954	Lpp	chr16:24392641-24992664	2.51213
375	NM_001146001	Pdzk1	chr3:96633748-96674849	3.18793
376	NM_001146021	Lrrc18	chr14:33772732-33998252	2.83215
377	NM_001146022	Wdfy4	chr14:33772732-33998252	5.44607
378	NM_001146046	Lrrc49	chr9:60435043-60535941	3.20029
379	NM_001146047	Lrrc49	chr9:60435043-60535941	3.4903
380	NM_001146053	Htatip2	chr7:57014475-57029369	6.3046
381	NM_001146086	Fbxo34	chr14:48092235-48151637	5.66644
382	NM_001146100	Hk1	chr10:61731602-61842656	5.68367
383	NM_001146309	Dbnl	chr11:5688485-5700983	2.68805
384	NM_001159288	Morc2a	chr11:3549496-3590375	2.84189
385	NM_001159369	Polq	chr16:37011871-37095503	2.29761
386	NM_001159483	Rpl19	chr11:97888023-97891807	2.1554
387	NM_001159513	H2afy	chr13:56174982-56236911	2.43078
388	NM_001159521	Plxnb2	chr15:88985978-89011218	2.86622
389	NM_001159532	Tex21	chr12:77299676-77347733	2.04349
390	NM_001159549	Nr6a1	chr2:38578893-38781981	2.3483
391	NM_001159563	Orc3	chr4:34497863-34562191	2.52013
392	NM_001159591	Csnk1g2	chr10:80085524-80103516	2.11102
393	NM_001159606	Pum1	chr4:130219273-130337479	3.16387
394	NM_001159630	Scmh1	chr4:120077885-120202804	3.80958
395	NM_001159683	Zfp217	chr2:169934142-169968175	3.6206
396	NM_001159774	Ikbkb	chr8:23769676-23817055	2.81496
397	NM_001159956	Pde1c	chr6:56019797-56319628	3.07758
398	NM_001159957	Pde1c	chr6:56019797-56319628	3.03462
399	NM_001159967	Ralgps2	chr1:158734296-158869757	2.19581
400	NM_001160018	Tor1aip1	chr1:157851728-157915989	2.59422
401	NM_001160019	Tor1aip1	chr1:157851728-157915989	2.26477
402	NM_001160209	Blzf1	chr1:166219930-166237615	3.03917
403	NM_001160221	Pum2	chr12:8680939-8759389	2.37874
404	NM_001160257	Smg7	chr1:154684124-154749776	5.46054
405	NM_001160268	Plekha6	chr1:135142673-135200012	4.11636
406	NM_001160319	Ubr4	chr4:138936573-139045447	6.39711
407	NM_001160386	Dnahc7b	chr1:46123582-46430395	3.4618
408	NM_001161367	Tdrd6	chr17:43752283-43767248	2.60056
409	NM_001161370	Ss18	chr18:14784137-14841423	2.01673
410	NM_001161627	Tmem116	chr5:121902717-121945430	2.60284
411	NM_001161628	Efcab6	chr15:83697141-83895779	4.13502
412	NM_001161629	Efcab6	chr15:83697141-83895779	4.38933
413	NM_001161773	4930544G11Rik	chr6:65902564-65904008	2.18405
414	NM_001161851	Fbxo44	chr4:147526908-147534173	2.43755
415	NM_001161852	Fbxo44	chr4:147526908-147534173	3.0207
416	NM_001162388	Pex11b	chr3:96439279-96449304	2.34008
417	NM_001162432	Lck	chr4:129225587-129250885	2.38411
418	NM_001162506	Troap	chr15:98905403-98913840	2.65664
419	NM_001162532	Fam174b	chr7:80885192-80921805	2.99322
420	NM_001162532	Fam174b	chr7:80885192-80921805	2.99322
421	NM_001162532	Fam174b	chr7:80885192-80921805	2.99322
422	NM_001162846	Phyhipl	chr10:69903415-70062039	2.60191
423	NM_001162864	Ttbk1	chr17:46579396-46624624	5.16683
424	NM_001162901	Tmem217	chr17:29662962-29686538	2.97178
425	NM_001162928	Pom121l2	chr13:22073049-22080603	5.96276
426	NM_001162943	Dchs1	chr7:112901502-112936064	4.24611
427	NM_001162943	Dchs1	chr7:112901502-112936064	4.24611
428	NM_001163102	Eme2	chr17:25029096-25032032	2.02737
429	NM_001163126	Cog5	chr12:32339733-32635400	2.2724
430	NM_001163189	Enthd1	chr15:80282669-80390900	3.3764
431	NM_001163271	Fscb	chr12:65572319-65575885	3.55302
432	NM_001163276	Med16	chr10:79357451-79371683	2.56999
433	NM_001163332	Cttnbp2nl	chr3:104804832-104856064	2.85368
434	NM_001163355	Rhot1	chr11:80022556-80081409	3.05293
435	NM_001163385	4930579F01Rik	chr3:137827098-137849677	2.91339
436	NM_001163433	Samd4	chr14:47502639-47725492	4.03437
437	NM_001163465	Rhpn1	chr15:75534717-75544849	2.71323
438	NM_001163475	Zfp746	chr6:48012393-48036592	2.28704
439	NM_001163488	Pfkm	chr15:97869174-97962878	2.05346
440	NM_001163489	Sema4a	chr3:88239883-88265104	3.02934
441	NM_001163512	Rgs12	chr5:35292096-35376242	2.19401
442	NM_001163532	Tmem175	chr5:109058828-109089788	3.0376
443	NM_001163569	Kif9	chr9:110379461-110427678	3.28746
444	NM_001163584	Prom1	chr5:44384860-44492975	3.45154
445	NM_001163689	Pnpla2	chr7:148641086-148646642	5.52304
446	NM_001163701	Rpap1	chr2:119589694-119613273	3.2405
447	NM_001163751	Spsb3	chr17:25023618-25029092	2.60269
448	NM_001163780	Ick	chr9:77956998-78019916	3.34786
449	NM_001163793	C530008M17Rik	chr5:77269623-77302579	2.93675
450	NM_001163836	Pabpc6	chr17:9859361-9862569	3.58968
451	NM_001164050	Pik3cd	chr4:149023276-149075738	5.2928
452	NM_001164052	Pik3cd	chr4:149023276-149075738	3.42211
453	NM_001164139	Spert	chr14:75982640-75992923	4.00229
454	NM_001164140	Spert	chr14:75982640-75992923	4.00443
455	NM_001164141	Spert	chr14:75982640-75992923	2.99662
456	NM_001164195	Pex3	chr10:13243647-13283182	2.01114
457	NM_001164236	1700034J05Rik	chr6:146837015-146980545	2.88605
458	NM_001164314	Wars	chr12:110098239-110132384	2.79547
459	NM_001164412	Cnot4	chr6:34972064-35083737	2.40929
460	NM_001164413	Cnot4	chr6:34972064-35083737	3.43547
461	NM_001164485	Fam170b	chr14:33647147-33649974	2.63983
462	NM_001164491	Ablim3	chr18:61959046-62071506	2.61303
463	NM_001164519	Ctnna3	chr10:62892845-64466415	2.66119
464	NM_001164559	Trmt1	chr8:87213145-87223707	4.33271
465	NM_001164610	Smpd4	chr16:17619446-17644923	4.06692
466	NM_001164628	Arhgap8	chr15:84545058-84602637	2.25717
467	NM_001164669	Dnahc6	chr6:72967600-73171625	3.48542
468	NM_001164791	B230120H23Rik	chr2:72123693-72280667	2.15123
469	NM_001165986	Ubap2l	chr3:89802681-89856437	5.49279
470	NM_001165989	Ckap5	chr2:91386478-91460822	2.19355
471	NM_001166251	Mgll	chr6:88674405-88778354	4.70929
472	NM_001166407	Kif20a	chr18:34758268-34811390	5.51271
473	NM_001166506	Sec14l1	chr11:116976485-117020582	3.66189
474	NM_001166507	Sec14l1	chr11:116976485-117020582	2.73266
475	NM_001166590	Eif5a	chr11:69730213-69735460	2.18622
476	NM_001166594	Eif5a	chr11:69730213-69735460	3.12343
477	NM_001166643	Bcas3	chr11:85166665-85639560	2.63953
478	NM_001166669	Gemin5	chr11:57933502-57982041	4.33962
479	NM_001166671	Gemin5	chr11:57933502-57982041	4.10257
480	NM_001167679	Wdr67	chr15:57743753-57801623	2.51555
481	NM_001167693	Gpr19	chr6:134819110-134847943	2.52159
482	NM_001167694	Gpr19	chr6:134819110-134847943	2.29689
483	NM_001167695	Gpr19	chr6:134819110-134847943	2.36657
484	NM_001167746	Dnahc17	chr11:117848170-117990533	4.47605
485	NM_001167763	Ift122	chr6:115803545-115876717	4.53333
486	NM_001167767	1110057K04Rik	chr12:8214912-8292565	3.22653
487	NM_001167818	Rnls	chr19:33212234-33466785	2.22763
488	NM_001167864	Hps5	chr7:54015835-54051251	2.7553
489	NM_001168255	Slc45a4	chr15:73410720-73455174	2.09931
490	NM_001168292	R3hdm2	chr10:126827366-126936440	2.81012
491	NM_001168337	Gm2825	chrX:30977792-30979742	5.56684
492	NM_001168373	Usp19	chr9:108393006-108404668	7.10623
493	NM_001168475	Ttc23	chr7:74792295-74871462	3.45367
494	NM_001168506	Zfp574	chr7:25862223-25868511	4.32961
495	NM_001168526	Sgms1	chr19:32197216-32462944	2.22266
496	NM_001168684	Tmcc3	chr10:93977601-94053699	2.01669
497	NM_001170567	Depdc5	chr5:33206369-33336882	3.9023
498	NM_001170694	Rcbtb2	chr14:73542316-73583861	2.5281
499	NM_001170742	Wdr59	chr8:113972683-114046007	3.74771
500	NM_001170746	Magi2	chr5:18732863-20210610	2.86377
501	NM_001170788	Lrrc36	chr8:107937521-107987986	3.70953
502	NM_001170855	Trim36	chr18:46324953-46372261	4.12214
503	NM_001170976	Dbndd1	chr8:126028617-126039355	2.39426
504	NM_001172073	Ttc4	chr4:106334412-106351549	2.3664
505	NM_001177307	Aldoa	chr7:133938747-133943961	3.14971
506	NM_001177372	Dbn1	chr13:55574788-55589437	2.62815
507	NM_001177534	Gm15881	chr8:60252848-61390424	2.76223
508	NM_001177646	Sirpa	chr2:129418574-129457964	4.2658
509	NM_001177755	Pfkfb3	chr2:11393057-11475556	3.48393
510	NM_001177758	Pfkfb3	chr2:11393057-11475556	3.8316
511	NM_001177784	Dis3l	chr9:64154562-64189064	5.344
512	NM_001177879	Phka2	chrX:156940097-157036810	2.79944
513	NM_001177882	Mfap3l	chr8:63111656-63155528	2.86427
514	NM_001185020	Wnk1	chr6:119873986-119988673	4.29446
515	NM_001190401	Usp34	chr11:23206894-23397946	4.92018
516	NM_001190443	Abcf2	chr5:24071158-24083285	5.65564
517	NM_001190444	Aamp	chr1:74326413-74331312	3.27831
518	NM_001190846	Kat2b	chr17:53706295-53812046	2.42368
519	NM_001190869	Kcne3	chr7:107325179-107333379	2.40385
520	NM_001190871	Kcne3	chr7:107325179-107333379	2.40854
521	NM_001190985	Lancl1	chr1:67047090-67085446	4.9167
522	NM_001195023	Nploc4	chr11:120241111-120299014	4.95653
523	NM_001195034	Acpt	chr7:51508456-51512574	4.17865
524	NM_001195271	Gm362	chrX:40944165-40946707	2.71604
525	NM_001195748	Rgs22	chr15:35939231-36070155	2.34248
526	NM_001195767	Gm6772	chr12:88075318-88104745	3.20304
527	NM_001197322	Foxp1	chr6:98875335-99385339	2.51828
528	NM_001198808	Sfmbt2	chr2:10292077-10516880	4.87511
529	NM_001198911	Arhgef2	chr3:88420128-88451974	3.33856
530	NM_001198912	Arhgef2	chr3:88420128-88451974	3.46582
531	NM_001198955	Gm7694	chr1:172228323-172236463	3.56986
532	NM_001199023	Pla2g6	chr15:79116657-79158801	6.36485
533	NM_001199025	Pla2g6	chr15:79116657-79158801	5.01482
534	NM_001199043	Lgals8	chr13:12531681-12554005	2.66578
535	NM_001199044	Prrc2a	chr17:35286030-35301822	4.02828
536	NM_001199060	Wdr12	chr1:60133711-60207878	3.29395
537	NM_001199061	Wdr12	chr1:60133711-60207878	2.17312
538	NM_001199113	Slc29a1	chr17:45722148-45736552	2.27367
539	NM_001199153	Sncaip	chr18:52927464-53075585	2.57217
540	NM_001199270	Aldoart1	chr4:72511616-72513668	2.77769
541	NM_001199432	Dnmt1	chr9:20711649-20764332	2.67395
542	NM_001199632	Fbxl13	chr5:20989664-21151423	3.52711
543	NM_001199941	D7Ertd443e	chr7:141457944-141568511	2.17767
544	NM_001199988	Tti2	chr8:32260787-32279196	2.92239
545	NM_001201569	Atp9b	chr18:80930879-81130797	2.55298
546	NM_001204071	Crisp2	chr17:40901682-40931095	3.17282
547	NM_001204229	Clec16a	chr16:10545431-10744971	4.90469
548	NM_001204907	Recql	chr6:142294216-142335607	3.11258
549	NM_001205082	Scarb1	chr5:125757456-125821464	2.26419
550	NM_001205082	Scarb1	chr5:125757456-125821464	2.26419
551	NM_001205181	Abhd4	chr14:54873803-54888844	5.64846
552	NM_001206335	Itfg3	chr17:26349636-26381187	5.9411
553	NM_001242365	Fam160a2	chr7:112519724-112548568	2.10757
554	NM_001242365	Fam160a2	chr7:112519724-112548568	2.10757
555	NM_001242430	Ammecr1l	chr18:31919477-31943737	3.00481
556	NM_001242558	Ncoa6	chr2:155216391-155266519	2.89624
557	NM_001242580	Nit1	chr1:173259275-173275776	2.60731
558	NM_001243018	E030019B06Rik	chr7:146786849-146802228	2.9766
559	NM_001243024	Gm3763	chrX:4598165-4600108	3.95322
560	NM_001243123	Fam193a	chr5:34712581-34829107	4.52955
561	NM_001243192	Serpinb6a	chr13:34009786-34094663	2.14254
562	NM_001252013	4930453H23Rik	chrX:20783705-20798791	2.21056
563	NM_001252070	Dnahc7a	chr1:53453845-53763628	4.03774
564	NM_001252220	Nbr1	chr11:101413420-101443265	4.29638
565	NM_001252222	Nbr1	chr11:101413420-101443265	2.69379
566	NM_001252445	Ppil2	chr16:17070403-17111345	2.94929
567	NM_001252448	Strada	chr11:106024287-106054917	2.72685
568	NM_001252456	Ptprs	chr17:56551848-56615903	4.32997
569	NM_001252468	Bag6	chr17:35272122-35284267	2.76835
570	NM_001252469	Bag6	chr17:35272122-35284267	4.8081
571	NM_001252474	Tjap1	chr17:46394799-46419975	4.26194
572	NM_001252489	Osbpl1a	chr18:12913820-13100350	2.14912
573	NM_001252538	Ciz1	chr2:32218529-32233833	3.19856
574	NM_001252561	Mllt10	chr2:17976863-18314457	2.40006
575	NM_001252567	Sez6l2	chr7:134094048-134114120	2.61885
576	NM_001252635	Cdh23	chr10:59765497-60159238	3.76293
577	NM_001252636	Rhobtb1	chr10:68671299-68754532	2.60662
578	NM_001252683	Dhx30	chr9:109986822-110020120	3.52651
579	NM_001253686	Immt	chr6:71781313-71825260	2.95492
580	NM_001253692	Elmod3	chr6:72515915-72548407	2.63589
581	NM_001253890	Prkar1b	chr5:139493257-139606340	2.0464
582	NM_001254724	1700023F06Rik	chr11:103060260-103079746	2.96263
583	NM_001256033	Otud4	chr8:82163574-82201654	3.87229
584	NM_001256083	Myo7a	chr7:105199563-105268003	4.26562
585	NM_001256098	Dtx2	chr5:136470669-136508751	2.49432
586	NM_001256102	Mtif3	chr5:147760232-147775373	3.08442
587	NM_001256117	Sun1	chr5:139676590-139725793	3.83016
588	NM_001256432	Epha10	chr4:124559028-124595044	2.39473
589	NM_007387	Acp2	chr2:91043068-91077223	2.59681
590	NM_007393	Actb	chr5:143664794-143668403	2.0532
591	NM_007401	Adam5	chr8:25843456-25934841	4.1146
592	NM_007453	Prdx6	chr1:163170242-163181297	2.03696
593	NM_007454	Ap1b1	chr11:4838758-4942797	4.01438
594	NM_007456	Ap1m1	chr8:74764030-74781278	4.96015
595	NM_007459	Ap2a2	chr7:148748078-148818910	2.30021
596	NM_007460	Ap3d1	chr10:80169722-80204956	4.17531
597	NM_007473	Aqp7	chr4:40980106-40995169	3.55917
598	NM_007475	Rplp0	chr5:116009475-116013738	3.93681
599	NM_007491	Art5	chr7:109245392-109248743	3.17624
600	NM_007496	Zfhx3	chr8:111238543-111485536	3.18854
601	NM_007517	Aup1	chr6:83004646-83007676	2.99277
602	NM_007530	Bcap29	chr12:32280218-32319523	3.55183
603	NM_007551	Cxcr5	chr9:44319869-44334504	2.33609
604	NM_007566	Birc6	chr17:74927634-75103113	3.11417
605	NM_007593	Cetn1	chr18:9618416-9619467	2.17945
606	NM_007598	Cap1	chr4:122536470-122563124	2.13334
607	NM_007619	Cbl	chr9:43957344-44042129	3.32132
608	NM_007624	Cbx3	chr6:51420614-51433703	2.50794
609	NM_007637	Cct5	chr15:31520638-31531559	2.2928
610	NM_007638	Cct7	chr6:85396778-85418471	3.07416
611	NM_007658	Cdc25a	chr9:109778082-109796394	2.72214
612	NM_007664	Cdh2	chr18:16747385-16967558	2.50632
613	NM_007697	Chl1	chr6:103460869-103683029	2.72808
614	NM_007713	Clk3	chr9:57598517-57613667	2.04777
615	NM_007754	Cpd	chr11:76590709-76660510	2.66603
616	NM_007760	Crat	chr2:30247935-30271268	4.56234
617	NM_007762	Crhr1	chr11:103994195-104036832	3.18666
618	NM_007772	Hivep1	chr13:42147389-42280395	3.47664
619	NM_007834	Dscr3	chr16:94719330-94748236	2.12473
620	NM_007858	Diap1	chr18:38004478-38095065	3.48812
621	NM_007871	Dnm2	chr9:21229351-21314630	4.83295
622	NM_007885	Slc26a2	chr18:61356507-61371250	2.28224
623	NM_007886	Dtnb	chr12:3572390-3781398	2.87989
624	NM_007907	Eef2	chr10:80639375-80645254	5.25576
625	NM_007943	Eps15	chr4:108952879-109060421	4.44527
626	NM_007948	Ercc1	chr7:19930419-19944832	2.27429
627	NM_007970	Ezh1	chr11:101052428-101087764	2.60515
628	NM_007981	Acsl1	chr8:47556395-47621404	3.69733
629	NM_007983	Faf1	chr4:109349231-109636565	2.37686
630	NM_007988	Fasn	chr11:120667271-120685861	3.5593
631	NM_007989	Foxh1	chr15:76498736-76500303	3.40839
632	NM_008110	Gdf9	chr11:53246787-53251404	2.4206
633	NM_008112	Gdi2	chr13:3537320-3610354	2.95049
634	NM_008146	Golga3	chr5:110605719-110652174	2.58297
635	NM_008153	Cmklr1	chr5:114062363-114100399	4.04247
636	NM_008155	Gpi1	chr7:34986345-35015324	2.86083
637	NM_008168	Grik5	chr7:25794869-25857388	2.11777
638	NM_008180	Gss	chr2:155388918-155418442	2.32454
639	NM_008188	Thumpd3	chr6:112996320-113027238	2.52528
640	NM_008214	Hars	chr18:36926181-36942859	2.45029
641	NM_008231	Hdgf	chr3:87710242-87720054	2.52409
642	NM_008244	Hgs	chr11:120328948-120345298	3.9763
643	NM_008255	Hmgcr	chr13:97418918-97440891	2.21904
644	NM_008296	Hsf1	chr15:76307874-76331402	2.53636
645	NM_008340	Igfals	chr17:25015714-25018953	3.67402
646	NM_008379	Kpnb1	chr11:97021023-97049206	3.24162
647	NM_008415	Jrk	chr15:74532841-74540804	2.47073
648	NM_008429	Kcnj9	chr1:174251163-174259394	2.12346
649	NM_008432	Kcnu1	chr8:26960094-27048406	4.68809
650	NM_008444	Kif3b	chr2:153117151-153159125	3.29313
651	NM_008513	Lrp5	chr19:3584824-3686564	3.84734
652	NM_008513	Lrp5	chr19:3584824-3686564	3.84734
653	NM_008547	Mak	chr13:41120488-41175075	3.56846
654	NM_008550	Man2b2	chr5:37198051-37221888	3.78318
655	NM_008552	Mas1	chr17:12875271-13061009	3.26401
656	NM_008568	Mcm7	chr5:138605816-138613090	2.19828
657	NM_008616	Zfp239	chr6:117813094-117822784	2.06152
658	NM_008641	Mast2	chr4:115979366-116136788	3.95448
659	NM_008642	Mttp	chr3:137752818-137806352	3.64779
660	NM_008659	Myo1c	chr11:75465010-75488136	3.23163
661	NM_008679	Ncoa3	chr2:165818136-165898742	3.55397
662	NM_008689	Nfkb1	chr3:135247618-135354511	2.32205
663	NM_008695	Nid2	chr14:20570478-20643045	3.35528
664	NM_008707	Nmt1	chr11:102889875-102927419	2.75566
665	NM_008715	Ints6	chr14:63282503-63448963	2.71212
666	NM_008739	Nsd1	chr13:55311142-55419686	2.07251
667	NM_008746	Ntrk3	chr7:85336999-85722724	2.11503
668	NM_008750	Nxn	chr11:76070727-76212643	2.00076
669	NM_008767	Slc22a18	chr7:150659659-150685237	2.72995
670	NM_008774	Pabpc1	chr15:36525412-36538728	3.62932
671	NM_008792	Pcsk2	chr2:143361211-143642018	4.18374
672	NM_008793	Pcsk4	chr10:79784027-79792218	2.47635
673	NM_008800	Pde1b	chr15:103333728-103360483	3.6636
674	NM_008803	Pde8a	chr7:88358689-88478508	2.76485
675	NM_008807	Tulp2	chr7:52769075-52777973	2.77183
676	NM_008882	Plxna2	chr1:196446022-196643062	5.3344
677	NM_008894	Pold2	chr11:5761868-5778259	2.34425
678	NM_008916	Inpp5k	chr11:75444521-75462367	4.06016
679	NM_008928	Map2k3	chr11:60745558-60766305	2.066
680	NM_008937	Prox1	chr1:191945657-191994559	2.32337
681	NM_008943	Psen1	chr12:85029512-85076149	4.58375
682	NM_008948	Psmc3	chr2:90894172-90899595	2.02164
683	NM_008951	Psmd4	chr3:94836626-94846467	2.02093
684	NM_008956	Ptbp1	chr10:79314121-79337379	3.05546
685	NM_008958	Ptch2	chr4:116768960-116787436	4.4484
686	NM_008959	Ptdss1	chr13:67013033-67133341	2.09797
687	NM_008981	Ptprg	chr14:12386066-13074553	2.7795
688	NM_009010	Rad23a	chr8:87356180-87364540	3.68481
689	NM_009022	Aldh1a2	chr9:71063595-71144050	2.96131
690	NM_009045	Rela	chr19:5637489-5648130	2.85079
691	NM_009053	Rfng	chr11:120642058-120645518	2.37621
692	NM_009055	Rfx1	chr8:86590734-86620891	3.9484
693	NM_009056	Rfx2	chr17:56915319-56970431	4.24043
694	NM_009088	Polr1a	chr6:71859046-71929355	3.60115
695	NM_009088	Polr1a	chr6:71859046-71929355	3.60115
696	NM_009097	Rps6ka1	chr4:133403205-133443714	3.51147
697	NM_009103	Rrm1	chr7:109590208-109618285	2.95205
698	NM_009158	Mapk10	chr5:103336966-103640353	2.51973
699	NM_009185	Stil	chr4:114672722-114715803	2.56216
700	NM_009188	Sin3b	chr8:75247186-75282102	2.10758
701	NM_009191	Clpb	chr7:108812281-108938682	3.21929
702	NM_009213	Smpd2	chr10:41206977-41210146	2.27021
703	NM_009228	Snta1	chr2:154202049-154233820	2.20286
704	NM_009270	Sqle	chr15:59146646-59162748	2.53669
705	NM_009274	Srpk2	chr5:22940246-23122389	2.16458
706	NM_009275	Srprb	chr9:103090362-103104395	2.18467
707	NM_009280	Ss18	chr18:14784137-14841423	3.27145
708	NM_009287	Stim1	chr7:109416337-109585369	2.39174
709	NM_009295	Stxbp1	chr2:32643126-32702757	2.39268
710	NM_009315	Taf6	chr5:138613248-138628414	2.98875
711	NM_009319	Tarbp2	chr15:102348622-102354107	3.48605
712	NM_009320	Slc6a6	chr6:91634060-91709057	2.43878
713	NM_009340	Tcp10a	chr17:13253976-13570089	3.13422
714	NM_009340_1	Tcp10a	chr17:7529008-7550209	2.33218
715	NM_009351	Tep1	chr14:51443735-51490229	3.99766
716	NM_009355	Prss39	chr1:34555274-34559907	4.67862
717	NM_009356	Prss40	chr1:34609176-34617788	2.41538
718	NM_009369	Tgfbi	chr13:56710963-56740700	2.68975
719	NM_009375	Tg	chr15:66502331-66682282	3.17831
720	NM_009391	Ran	chr5:129526030-129530196	2.75956
721	NM_009410	Top3a	chr11:60553560-60590867	2.70073
722	NM_009415	Tpi1	chr6:124758958-124764314	2.0076
723	NM_009420	Crisp2	chr17:40901682-40931095	3.5679
724	NM_009421	Traf1	chr2:34798777-34817292	2.6671
725	NM_009441	Ttc3	chr16:94580369-94690828	2.37033
726	NM_009445	Ttk	chr9:83728295-83765997	3.00691
727	NM_009462	Usp10	chr8:122434751-122481457	2.41694
728	NM_009549	Zfp185	chrX:70232677-70276882	2.90473
729	NM_009554	Zfp37	chr4:61850576-61869580	2.27632
730	NM_009567	Zfp93	chr7:25055436-25062813	2.25016
731	NM_009570	Zfy1	chrY:61649-133852	2.58862
732	NM_009571	Zfy2	chrY:1362122-1426357	2.28835
733	NM_009594	Abl1	chr2:31544075-31659747	2.77322
734	NM_009598	Ace	chr11:105829258-105851278	3.0417
735	NM_009609	Actg1	chr11:120207003-120209798	2.73238
736	NM_009610	Actg2	chr6:83462902-83486245	2.5787
737	NM_009611	Actl7a	chr4:56756293-56757797	3.39111
738	NM_009619	Adam3	chr8:25787705-25836297	5.27662
739	NM_009648	Akap1	chr11:88692105-88725900	3.04494
740	NM_009650	Akap3	chr6:126803115-126824326	4.0146
741	NM_009651	Akap4	chrX:6644644-6655732	5.49111
742	NM_009680	Ap3b1	chr13:95128914-95336271	3.59202
743	NM_009685	Apbb1	chr7:112706978-112730167	2.82713
744	NM_009694	Apobec2	chr17:48558555-48572053	2.45606
745	NM_009702	Aqr	chr2:113926908-114001075	2.52606
746	NM_009702	Aqr	chr2:113926908-114001075	2.52606
747	NM_009703	Araf	chrX:20425668-20498044	2.77412
748	NM_009712	Arsb	chr13:94541633-94712971	2.34237
749	NM_009713	Arsa	chr15:89302906-89307855	3.36458
750	NM_009728	Atp10a	chr7:65913571-66084796	2.95307
751	NM_009733	Axin1	chr17:26275630-26332756	2.24081
752	NM_009743	Bcl2l1	chr2:152606403-152657418	3.6607
753	NM_009745	Bcl7b	chr5:135644241-135657722	2.2369
754	NM_009765	Brca2	chr5:151325197-151372324	2.36812
755	NM_009790	Calm1	chr12:101437750-101448016	2.28887
756	NM_009795	Capns1	chr7:30971960-30980067	2.8405
757	NM_009797	Capza1	chr3:104625702-104667423	3.08569
758	NM_009817	Cast	chr13:74831733-74945369	2.27396
759	NM_009822	Runx1t1	chr4:13670448-13820790	3.51774
760	NM_009823	Cbfa2t2	chr2:154262219-154365092	3.47472
761	NM_009832	Ccnk	chr12:109417947-109441569	2.04366
762	NM_009833	Ccnt1	chr15:98373641-98401295	3.12923
763	NM_009839	Cct6b	chr11:82532749-82577790	3.3109
764	NM_009848	Entpd1	chr19:40734283-40816092	3.55934
765	NM_009916	Ccr4	chr9:114399433-114405662	3.4293
766	NM_009938	Copa	chr1:173996143-174052463	2.70234
767	NM_009975	Csnk2b	chr17:35253139-35258392	2.37843
768	NM_010026	Asap1	chr15:63920100-64214481	4.12636
769	NM_010026	Asap1	chr15:63920100-64214481	4.12636
770	NM_010058	Dmwd	chr7:19661548-19668124	2.08326
771	NM_010065	Dnm1	chr2:32163990-32208824	3.84337
772	NM_010086	Adam24	chr8:41760447-41767553	2.4381
773	NM_010091	Dvl1	chr4:155221520-155237462	2.64659
774	NM_010106	Eef1a1	chr9:78326260-78329531	3.39334
775	NM_010108	Efna3	chr3:89118872-89126801	2.81383
776	NM_010119	Ehd1	chr19:6276895-6300096	2.20702
777	NM_010127	Pou6f1	chr15:100405748-100416796	2.42011
778	NM_010167	Eya4	chr10:22823973-23069709	2.73323
779	NM_010173	Faah	chr4:115669260-115690507	2.43071
780	NM_010181	Fbn2	chr18:58168276-58369580	2.41673
781	NM_010188	Fcgr3	chr1:172981299-172989534	2.06171
782	NM_010191	Fdft1	chr14:63741298-63796630	3.38124
783	NM_010192	Fem1a	chr17:56396215-56403031	2.45651
784	NM_010193	Fem1b	chr9:62639635-62659455	2.41102
785	NM_010214	Fhl4	chr10:84559763-84565240	4.61827
786	NM_010238	Brd2	chr17:34248963-34259552	2.75927
787	NM_010248	Gab2	chr7:104230260-104457461	2.21567
788	NM_010269	Gdap2	chr3:99966440-100010904	3.05537
789	NM_010274	Gpd2	chr2:57090088-57223130	3.90798
790	NM_010293	Gykl1	chr18:52853332-52855247	2.88458
791	NM_010294	Gk2	chr5:97821435-98017145	2.97576
792	NM_010301	Gna11	chr10:80991476-81007791	2.89941
793	NM_010302	Gna12	chr5:141235897-141306385	3.17544
794	NM_010303	Gna13	chr11:109216091-109262683	2.05391
795	NM_010308	Gnao1	chr8:96334737-96493288	2.59696
796	NM_010308	Gnao1	chr8:96334737-96493288	2.59696
797	NM_010322	Gnpat	chr8:127386932-127413957	2.68356
798	NM_010352	Gsg1	chr6:135187347-135204354	4.45261
799	NM_010353	Gsg2	chr11:72904096-72960951	3.55814
800	NM_010414	Htt	chr5:35104388-35255170	3.81227
801	NM_010418	Herc2	chr7:63305524-63487168	2.32539
802	NM_010421	Hexa	chr9:59387473-59412912	3.34894
803	NM_010434	Hipk3	chr2:104266638-104334646	3.3308
804	NM_010438	Hk1	chr10:61731602-61842656	3.7471
805	NM_010483	Htr5b	chr1:123406349-123425042	2.15848
806	NM_010492	Ica1	chr6:8580526-8728484	2.81402
807	NM_010508	Ifnar1	chr16:91485459-91510767	2.14402
808	NM_010560	Il6st	chr13:113254277-113297068	2.07125
809	NM_010561	Ilf3	chr9:21172446-21216164	3.4221
810	NM_010593	Jup	chr11:100230169-100259104	2.47991
811	NM_010613	Khsrp	chr17:57160471-57170930	2.90137
812	NM_010623	Kif17	chr4:137818165-137857888	3.62079
813	NM_010626	Kif7	chr7:86805081-86859072	3.03864
814	NM_010626	Kif7	chr7:86805081-86859072	3.03864
815	NM_010628	Kif9	chr9:110379461-110427678	3.29178
816	NM_010637	Klf4	chr4:55540008-55545347	2.3583
817	NM_010655	Kpna2	chr11:106849942-106860839	5.74138
818	NM_010684	Lamp1	chr8:13159134-13175338	2.4973
819	NM_010687	Large	chr8:75338497-75876455	2.98298
820	NM_010716	Lig3	chr11:82594636-82684712	4.32284
821	NM_010718	Limk2	chr11:3243299-3309238	2.7713
822	NM_010736	Ltbr	chr6:125256588-125263888	2.64108
823	NM_010751	Mxd1	chr6:86597038-86619153	2.04848
824	NM_010752	Mad1l1	chr5:140484642-140797506	2.45544
825	NM_010763	Man1a2	chr3:100366126-100489396	2.60111
826	NM_010787	Mea1	chr17:46818085-46841951	2.12918
827	NM_010811	Ndst2	chr14:21542951-21553784	3.46624
828	NM_010813	Mnt	chr11:74644425-74659227	2.32383
829	NM_010840	Mthfr	chr4:147413185-147433671	3.67397
830	NM_010840	Mthfr	chr4:147413185-147433671	3.67397
831	NM_010865	Myoc	chr1:164569280-164588350	4.33653
832	NM_010881	Ncoa1	chr12:4247361-4484060	2.6005
833	NM_010892	Nek2	chr1:193645351-193656928	2.5005
834	NM_010897	Nf1	chr11:79153393-79395111	3.47445
835	NM_010898	Nf2	chr11:4665847-4749547	2.53448
836	NM_010918	Nktr	chr9:121628298-121669061	2.58608
837	NM_010945	Nsmaf	chr4:6323353-6381418	2.40631
838	NM_011033	Pabpc2	chr18:39933150-39935736	4.05713
839	NM_011049	Cdk16	chrX:20265618-20277003	3.09118
840	NM_011055	Pde3b	chr7:121558767-121681451	2.00069
841	NM_011074	Cdk14	chr5:4803384-5380251	2.10297
842	NM_011103	Prkcd	chr14:31408539-31439394	2.50473
843	NM_011103	Prkcd	chr14:31408539-31439394	2.50473
844	NM_011130	Polb	chr8:23738590-23763909	2.14254
845	NM_011132	Pole	chr5:110715337-110766472	3.20636
846	NM_011137	Pou2f1	chr1:167718811-167932765	2.74408
847	NM_011147	Ppef1	chrX:157061026-157157904	3.6518
848	NM_011184	Psma3	chr12:72075609-72116810	2.76918
849	NM_011188	Psmc2	chr5:21291100-21309602	4.00788
850	NM_011213	Ptprf	chr4:117880817-117964002	3.72689
851	NM_011223	Pxn	chr5:115956710-116005995	3.12174
852	NM_011245	Rasgrf1	chr9:89804612-89921817	3.89392
853	NM_011256	Pitpnm2	chr5:124568698-124666427	3.38882
854	NM_011258	Rfc1	chr5:65653090-65726878	2.20828
855	NM_011264	Rev3l	chr10:39451965-39595011	3.70103
856	NM_011305	Rxra	chr2:27532720-27618839	2.16611
857	NM_011308	Ncor1	chr11:62094974-62270834	3.4658
858	NM_011366	Sorbs3	chr14:70580274-70607444	2.81727
859	NM_011390	Slc12a7	chr13:73901144-73954190	2.42466
860	NM_011391	Slc16a7	chr10:124664540-124765591	3.67498
861	NM_011396	Slc22a5	chr11:53678043-53705205	2.27328
862	NM_011401	Slc2a3	chr6:122677826-122692763	2.06888
863	NM_011402	Slc34a2	chr5:53440591-53462902	4.46006
864	NM_011417	Smarca4	chr9:21420612-21508674	6.24249
865	NM_011418	Smarcb1	chr10:75359513-75384359	2.42764
866	NM_011445	Sox6	chr7:122614857-123182258	4.41729
867	NM_011481	Srms	chr2:180940267-180947876	2.30074
868	NM_011481	Srms	chr2:180940267-180947876	2.30074
869	NM_011487	Stat4	chr1:52065087-52164028	3.55718
870	NM_011495	Plk4	chr3:40603872-40620805	2.31975
871	NM_011497	Aurka	chr2:172181695-172196006	3.31935
872	NM_011503	Stxbp2	chr8:3631159-3643644	2.31688
873	NM_011512	Surf4	chr2:26768897-26789031	2.83654
874	NM_011552	Tcof1	chr18:60973409-61008618	2.2664
875	NM_011553	Tcp10a	chr17:7529008-7550209	2.64227
876	NM_011569	Tekt1	chr11:72158221-72175382	3.50949
877	NM_011571	Tesk1	chr4:43455148-43467498	2.62327
878	NM_011574	Cirh1a	chr8:109417539-109446994	2.31959
879	NM_011583	Theg	chr10:79039221-79049881	2.22882
880	NM_011586	Myo18a	chr11:77590766-77679482	2.99044
881	NM_011615	Dedd	chr1:173259275-173275776	2.01576
882	NM_011624	Top3b	chr16:16870983-16893079	3.16637
883	NM_011625	Ppp1r13b	chr12:113066668-113146266	3.50692
884	NM_011629	Nr2c1	chr10:93610675-93659959	3.21859
885	NM_011630	Nr2c2	chr6:92041411-92134017	3.60397
886	NM_011644	Trpc2	chr7:109214226-109244930	2.20909
887	NM_011664	Ubb	chr11:62365005-62366714	3.88559
888	NM_011678	Usp4	chr9:108250161-108294860	2.81169
889	NM_011695	Vdac2	chr14:22650782-22668132	2.0814
890	NM_011710	Wars	chr12:110098239-110132384	3.60962
891	NM_011715	Wdr1	chr5:38918051-38952834	2.55056
892	NM_011740	Ywhaz	chr15:36700015-36726684	2.57141
893	NM_011747	Zfp13	chr17:23712818-23736454	2.90683
894	NM_011755	Zfp35	chr18:24148134-24163872	3.86157
895	NM_011757	Zscan21	chr5:138558132-138575487	4.42655
896	NM_011758	Zfp39	chr11:58701654-58717727	3.39447
897	NM_011760	Zfp54	chr17:21560190-21572348	3.21576
898	NM_011760	Zfp54	chr17:21560190-21572348	3.21576
899	NM_011762	Zfp59	chr7:28623602-28641793	2.60222
900	NM_011766	Zfpm2	chr15:40486587-40936138	2.47237
901	NM_011767	Zfr	chr15:12047605-12115205	2.76382
902	NM_011773	Slc30a3	chr5:31388478-31395900	2.55269
903	NM_011790	Arih2	chr9:108505273-108551711	2.36912
904	NM_011806	Dmtf1	chr5:9100736-9161776	2.85548
905	NM_011811	Farsb	chr1:78421410-78485421	2.57894
906	NM_011844	Mgll	chr6:88674405-88778354	2.08858
907	NM_011849	Nek4	chr14:31764673-31800587	2.66639
908	NM_011866	Pde10a	chr17:8994609-9179513	3.90647
909	NM_011869	Med24	chr11:98565904-98590749	4.28816
910	NM_011913	Best1	chr19:10059661-10076123	3.12706
911	NM_011947	Map3k3	chr11:105946215-106016748	2.5325
912	NM_011952	Mapk3	chr7:133903139-133909330	2.051
913	NM_011956	Nubp2	chr17:25019555-25023295	2.27095
914	NM_011959	Orc5	chr5:21992306-22056149	2.13043
915	NM_011973	Stk30	chr12:112046007-112079149	2.76186
916	NM_011973	Stk30	chr12:112046007-112079149	2.76186
917	NM_011991	Cops3	chr11:59623581-59653269	2.40819
918	NM_012001	Cops4	chr5:100947327-100976821	4.05024
919	NM_012003	Cops7a	chr6:124908428-124915547	2.66011
920	NM_012012	Exo1	chr1:177810908-177841527	2.44446
921	NM_012017	Zfp346	chr13:55206669-55236432	2.20161
922	NM_012024	Ppp2r5e	chr12:76551867-76697187	2.01657
923	NM_012049	Nit1	chr1:173259275-173275776	3.01867
924	NM_012055	Asns	chr6:7625170-7643182	3.38863
925	NM_013455	Acr	chr15:89398756-89405016	3.7547
926	NM_013481	Bop1	chr15:76210942-76307699	2.12681
927	NM_013507	Eif4g2	chr7:118211498-118226544	3.29914
928	NM_013511	Epb4.1l2	chr10:25079603-25243324	2.48983
929	NM_013558	Hspa1l	chr17:35109647-35116173	2.43034
930	NM_013580	Ldhc	chr7:54116632-54133512	2.19982
931	NM_013581	Cog1	chr11:113510842-113545465	3.90593
932	NM_013605	Muc1	chr3:89032973-89037291	2.9322
933	NM_013630	Pkd1	chr17:24686894-24769574	2.96806
934	NM_013661	Sema5b	chr16:35541447-35664344	2.29386
935	NM_013684	Tbp	chr17:15636851-15654391	2.13804
936	NM_013688	Tcte1	chr17:45660382-45686626	3.76004
937	NM_013733	Chaf1a	chr17:56179838-56207449	2.18653
938	NM_013734	Atp1a4	chr1:174153638-174188555	4.38199
939	NM_013735	Trp53bp1	chr2:120996941-121097122	2.25076
940	NM_013736	Tceb3	chr4:135559284-135577564	2.33724
941	NM_013742	Cars	chr7:150743134-150785995	3.37883
942	NM_013744	Zfp354b	chr11:50735287-50745137	2.74403
943	NM_013761	Srr	chr11:74711581-74739300	2.96977
944	NM_013762	Rpl3	chr15:79908210-79913836	2.09402
945	NM_013768	Prmt5	chr14:55126018-55136307	3.11809
946	NM_013770	Slc25a10	chr11:120353150-120362475	2.34172
947	NM_013782	Ptdss2	chr7:148317184-148342053	3.17271
948	NM_013783	Mmel1	chr4:154243693-154269639	4.1916
949	NM_013787	Skp2	chr15:9041741-9070207	2.49222
950	NM_013792	Naglu	chr11:100931407-100938985	2.17249
951	NM_013803	Casr	chr16:36493781-36562220	4.5264
952	NM_013811	Dnahc8	chr17:30763880-31012209	4.91678
953	NM_013813	Epb4.1l3	chr17:69506149-69639327	2.01584
954	NM_013829	Plcb4	chr2:135567565-135838804	2.55851
955	NM_013852	Abcf3	chr16:20548675-20561676	2.15784
956	NM_013853	Abcf2	chr5:24071158-24083285	4.26449
957	NM_013860	Limd1	chr9:123387818-123430670	2.29714
958	NM_013865	Ndrg3	chr2:156753077-156817847	2.98228
959	NM_013881	Ulk2	chr11:61589099-61668594	4.22297
960	NM_013883	Scmh1	chr4:120077885-120202804	3.53297
961	NM_013885	Clic4	chr4:134769884-134828675	2.66445
962	NM_013908	Fbxw5	chr2:25356297-25360990	3.63028
963	NM_013910	Kdm2b	chr5:123320684-123439101	2.0906
964	NM_013910	Kdm2b	chr5:123320684-123439101	2.0906
965	NM_013914	Snai3	chr8:124978105-124984592	2.75459
966	NM_013918	Usp25	chr16:77014313-77117025	2.15767
967	NM_013927	Cngb3	chr4:19207996-19437770	3.04759
968	NM_013932	Ddx25	chr9:35349432-35366055	3.2563
969	NM_015731	Atp9a	chr2:168459937-168567300	3.05483
970	NM_015735	Ddb1	chr19:10680114-10704311	3.29902
971	NM_015763	Lpin1	chr12:16542474-16596576	3.20126
972	NM_015769	Ercc4	chr16:13109828-13152102	3.38138
973	NM_015771	Lats2	chr14:58308498-58364960	2.69209
974	NM_015773	Spag6	chr16:16753108-16829456	4.28219
975	NM_015789	Dkkl1	chr7:52462894-52467253	2.84198
976	NM_015803	Atp8a2	chr14:60266577-60705671	3.42569
977	NM_015804	Atp11a	chr8:12757015-12868728	3.38073
978	NM_015805	Atp9b	chr18:80930879-81130797	2.18288
979	NM_015824	Orc3	chr4:34497863-34562191	3.24012
980	NM_016670	Pknox1	chr17:31701717-31744638	2.58906
981	NM_016683	Zkscan5	chr5:145965427-145982619	5.79136
982	NM_016685	Comp	chr8:72897446-72905965	3.06537
983	NM_016694	Park2	chr17:11033249-12256226	4.00354
984	NM_016698	Rnf10	chr5:115691778-115722904	2.6938
985	NM_016699	Exosc10	chr4:147932535-147956509	3.82115
986	NM_016706	Coil	chr11:88835248-88852927	2.11289
987	NM_016714	Nup50	chr15:84753857-84773393	2.09664
988	NM_016721	Iqgap1	chr7:87856468-87948217	2.91857
989	NM_016736	Nub1	chr5:24191632-24216373	2.98546
990	NM_016743	Nell2	chr15:95049880-95359137	3.34865
991	NM_016775	Dnajc5	chr2:181255209-181286954	2.83034
992	NM_016781	Prkag1	chr15:98643227-98661939	2.08186
993	NM_016795	Srpk1	chr17:28726536-28759399	3.14549
994	NM_016811	Dgka	chr10:128143313-128181112	4.59977
995	NM_016843	Atxn10	chr15:85166810-85294266	2.20612
996	NM_016846	Rgl1	chr1:154364659-154472241	2.88059
997	NM_016852	Wbp2	chr11:115939886-115948278	2.12758
998	NM_016857	Exoc7	chr11:116149311-116168052	3.66823
999	NM_016859	Bysl	chr17:47641999-47748441	2.68232
1000	NM_016860	Actr1a	chr19:46451303-46470225	3.37515
1001	NM_016866	Stk39	chr2:68048503-68310038	2.07272
1002	NM_016875	Ybx2	chr11:69749400-69755101	2.21995
1003	NM_016876	Eif3g	chr9:20698792-20703034	2.54314
1004	NM_016881	Pmm2	chr16:8637799-8657617	3.24362
1005	NM_016893	Fut8	chr12:78339090-78576983	3.66697
1006	NM_016906	Sec61a1	chr6:88453600-88468794	2.72161
1007	NM_016915	Pla2g6	chr15:79116657-79158801	5.8002
1008	NM_016925	Fanca	chr8:125778094-125842476	2.68384
1009	NM_016927	Pkd2l2	chr18:34569076-34666477	3.4415
1010	NM_016964	Stag3	chr5:138721736-138753621	3.78841
1011	NM_016965	Nckap1	chr2:80341451-80421122	3.15061
1012	NM_017379	Tuba8	chr6:121160787-121176115	2.07625
1013	NM_017402	Arhgef7	chr8:11728104-11835217	3.04641
1014	NM_017407	Spag5	chr11:78115092-78135956	2.18263
1015	NM_017464	Nedd9	chr13:41405284-41582689	3.2585
1016	NM_018743	Agpat6	chr8:24283417-24318925	3.27722
1017	NM_018749	Eif3d	chr15:77789427-77801254	2.27292
1018	NM_018757	Nme6	chr9:109735307-109745475	2.23615
1019	NM_018786	Prpf40b	chr15:99125839-99147438	2.90598
1020	NM_018790	Arc	chr15:74499512-74503000	4.55361
1021	NM_018793	Tyk2	chr9:20908511-20935719	3.20306
1022	NM_018804	Syt11	chr3:88548622-88576521	2.80194
1023	NM_018807	Plagl2	chr2:153053504-153067094	2.48046
1024	NM_018808	Dnajb1	chr8:86132073-86135802	3.0597
1025	NM_018810	Mkrn1	chr6:39347819-39370368	2.46913
1026	NM_018811	Abhd2	chr7:86418151-86506487	2.12097
1027	NM_018814	Pcnx	chr12:82961016-83101911	3.87473
1028	NM_018822	Sgsh	chr11:119176100-119216824	2.23856
1029	NM_018858	Pebp1	chr5:117732659-117737573	2.40509
1030	NM_018859	Akr1e1	chr13:4591735-4608410	2.15566
1031	NM_018862	Agpat1	chr17:34742805-34752916	2.92952
1032	NM_018870	Pgam2	chr11:5701639-5703799	2.95149
1033	NM_018872	Tmem131	chr1:36849033-36996372	3.34857
1034	NM_018873	Srcin1	chr11:97370653-97436440	2.51181
1035	NM_018878	Paxip1	chr5:28067204-28117879	3.34195
1036	NM_019395	Fbp1	chr13:62966112-62989596	4.15837
1037	NM_019423	Elovl2	chr13:41277750-41315772	3.34313
1038	NM_019426	Atf7ip	chr6:136467371-136555900	2.92787
1039	NM_019426	Atf7ip	chr6:136467371-136555900	2.92787
1040	NM_019460	Sfmbt1	chr14:31528034-31635907	2.11653
1041	NM_019465	Crtam	chr9:40780880-40812669	2.73936
1042	NM_019468	G6pd2	chr5:62200081-62201716	2.82364
1043	NM_019492	Rgs3	chr4:62220880-62364053	3.47294
1044	NM_019519	Rabggta	chr14:56334713-56341013	2.45285
1045	NM_019536	Dnahc10	chr5:125205454-125314678	3.91895
1046	NM_019569	Fscn3	chr6:28377900-28388622	3.04105
1047	NM_019573	Wwox	chr8:116963551-117876612	3.3225
1048	NM_019575	Scamp4	chr10:80065624-80078528	2.24512
1049	NM_019636	Tbc1d1	chr5:64551449-64742725	2.41926
1050	NM_019639	Ubc	chr5:125866334-125870387	4.531
1051	NM_019642	Rpn2	chr2:157034285-157152054	3.04455
1052	NM_019649	Clptm1	chr7:20216928-20250379	3.68788
1053	NM_019651	Ptpn9	chr9:56842774-56919773	2.76727
1054	NM_019663	Pias1	chr9:62727883-62828686	4.66208
1055	NM_019667	Stam2	chr2:52547724-52601183	2.04699
1056	NM_019678	Tfg	chr16:56690441-56717563	2.08189
1057	NM_019681	Ncs1	chr2:31101442-31150991	2.8718
1058	NM_019689	Arid3b	chr9:57638315-57682041	2.83499
1059	NM_019702	Hbs1l	chr10:21015784-21088695	2.10846
1060	NM_019703	Pfkp	chr13:6547402-6647970	3.00112
1061	NM_019704	Tmem115	chr9:107436275-107440987	2.10525
1062	NM_019707	Cdh13	chr8:120807654-121847348	3.55623
1063	NM_019723	Slc22a21	chr11:53764325-53793529	4.64965
1064	NM_019726	Gps2	chr11:69727693-69730093	2.70889
1065	NM_019727	Snx1	chr9:65935933-65972693	2.03914
1066	NM_019729	Usp8	chr2:126533063-126585050	3.87008
1067	NM_019741	Slc2a5	chr4:149493452-149518277	4.9961
1068	NM_019744	Ncoa4	chr14:32973077-32992549	3.66382
1069	NM_019758	Mtch2	chr2:90687311-90706791	2.3229
1070	NM_019763	Spen	chr4:141000587-141094512	4.39781
1071	NM_019766	Ptges3	chr10:127496037-127514310	2.40286
1072	NM_019798	Pde4a	chr9:20970157-21017692	3.30484
1073	NM_019798	Pde4a	chr9:20970157-21017692	3.30484
1074	NM_019799	Rhcg	chr7:86738248-86762543	3.21169
1075	NM_019811	Acss2	chr2:155343778-155388479	2.4635
1076	NM_019864	Atr	chr9:95755968-95852063	2.40511
1077	NM_019873	Fkbpl	chr17:34781827-34783272	2.5538
1078	NM_019875	Abcb9	chr5:124511865-124545807	2.4784
1079	NM_019913	Txn2	chr15:77745480-77759424	2.51565
1080	NM_019930	Ranbp9	chr13:43493744-43576342	3.53136
1081	NM_019933	Ptpn4	chr1:121554669-121733648	2.13099
1082	NM_019934	Sec1	chr7:52933056-52934928	2.93352
1083	NM_019938	Pmfbp1	chr8:112017926-112066542	2.94207
1084	NM_019965	Dnajb12	chr10:59342338-59360764	2.46746
1085	NM_019972	Sort1	chr3:108087049-108164429	2.63602
1086	NM_019973	Son	chr16:91648068-91679437	5.15267
1087	NM_020009	Mtor	chr4:147822690-147931794	5.55193
1088	NM_020012	Rnf14	chr18:38456288-38477503	2.31716
1089	NM_020027	Prrc2a	chr17:35286030-35301822	3.93615
1090	NM_020032	Poll	chr19:45626765-45635033	4.6194
1091	NM_020035	Pigo	chr4:43030509-43038628	2.36268
1092	NM_020052	Scube2	chr7:116942204-117009193	2.7715
1093	NM_020295	Lmbr1	chr5:29556341-29704930	2.29249
1094	NM_020333	Slc12a5	chr2:164793487-164825231	2.79635
1095	NM_020494	Ddx24	chr12:104646185-104664077	3.03648
1096	NM_020506	Xpo4	chr14:58201107-58283793	2.56924
1097	NM_020561	Smpdl3a	chr10:57514349-57531636	2.70251
1098	NM_020608	Cramp1l	chr17:25098170-25152175	2.85023
1099	NM_020614	Taf1b	chr12:25183445-25243436	2.56073
1100	NM_021280	Plcg1	chr2:160557045-160698726	4.3337
1101	NM_021286	Sez6	chr11:77744444-77792544	2.69859
1102	NM_021295	Lancl1	chr1:67047090-67085446	2.72358
1103	NM_021299	Ak3	chr19:29095321-29123219	3.10349
1104	NM_021299	Ak3	chr19:29095321-29123219	3.10349
1105	NM_021318	Fhl5	chr4:25127055-25170023	2.53628
1106	NM_021328	Bin3	chr14:70499951-70553598	2.26786
1107	NM_021346	Zfp318	chr17:46520714-46557867	3.30919
1108	NM_021354	Drg2	chr11:60268118-60282207	2.66789
1109	NM_021356	Gab1	chr8:83288332-83404378	2.04303
1110	NM_021356	Gab1	chr8:83288332-83404378	2.04303
1111	NM_021362	Pappa	chr4:64785207-65018543	4.26393
1112	NM_021383	Rqcd1	chr1:74455957-74634602	2.27441
1113	NM_021388	Extl2	chr3:115710366-115731934	2.94086
1114	NM_021388	Extl2	chr3:115710366-115731934	2.94086
1115	NM_021408	Ush2a	chr1:190086716-190788918	4.05266
1116	NM_021435	Slc35b4	chr6:34105878-34127054	3.32348
1117	NM_021440	BC100451	chr11:118162374-118216725	2.94414
1118	NM_021449	Crbn	chr6:106719131-106750068	3.15694
1119	NM_021462	Mknk2	chr10:80128073-80134721	2.6865
1120	NM_021470	Rnf32	chr5:29524545-29551831	2.52728
1121	NM_021491	Smpd3	chr8:108776447-108861888	2.7805
1122	NM_021493	Arhgap23	chr11:97311473-97363714	2.20213
1123	NM_021493	Arhgap23	chr11:97311473-97363714	2.20213
1124	NM_021494	Dennd5a	chr7:117037294-117103936	3.585
1125	NM_021501	Pias4	chr10:80616715-80630465	3.81666
1126	NM_021504	Ngly1	chr14:17071172-17144440	2.2412
1127	NM_021529	Ppp2r3c	chr12:56381800-56483478	2.36902
1128	NM_021530	Slc4a8	chr15:100592177-100654402	2.48009
1129	NM_021537	Stk25	chr1:95408680-95532304	2.32644
1130	NM_021555	Fam203a	chr15:76199327-76201841	2.47256
1131	NM_021557	Rdh11	chr12:80276537-80292806	3.29464
1132	NM_021568	Pcbp3	chr10:76224598-76424692	3.40997
1133	NM_021608	Dctn5	chr7:129276554-129292558	2.00329
1134	NM_021793	Tmem8	chr17:26250260-26260198	4.06531
1135	NM_021885	Tub	chr7:116154393-116226838	2.7553
1136	NM_021921	Mapk8ip2	chr15:89284341-89292878	2.93671
1137	NM_022009	Flii	chr11:60513191-60540723	2.0469
1138	NM_022012	Map3k11	chr19:5689130-5702864	2.48129
1139	NM_022026	Aqp9	chr9:70958467-71011096	2.8859
1140	NM_022311	Tcte2	chr17:13853442-14042801	3.09874
1141	NM_022328	Mllt1	chr17:57032033-57074811	2.21184
1142	NM_022408	Dgcr14	chr16:17900801-17911441	2.91105
1143	NM_022432	Sirt2	chr7:29551770-29573684	4.98564
1144	NM_022433	Sirt3	chr7:148043295-148068208	2.44712
1145	NM_022565	Ndst4	chr3:125107008-125427904	2.58277
1146	NM_022653	Thop1	chr10:80532827-80545105	3.27125
1147	NM_022813	Scamp2	chr9:57408750-57436605	2.13597
1148	NM_022887	Tsc1	chr2:28496762-28546687	4.18651
1149	NM_022979	Nup98	chr7:109282716-109358634	3.55962
1150	NM_022981	Zfp110	chr7:13420158-13435933	3.93269
1151	NM_022994	Dap3	chr3:88724724-88754204	2.59289
1152	NM_022997	Vps35	chr8:87784290-87823396	2.28677
1153	NM_023047	Dpysl5	chr5:31014267-31101742	2.5213
1154	NM_023047	Dpysl5	chr5:31014267-31101742	2.5213
1155	NM_023060	Eefsec	chr6:88207327-88396533	3.21165
1156	NM_023146	Ranbp17	chr11:33111793-33413746	3.49179
1157	NM_023168	Grina	chr15:76077236-76080334	3.23271
1158	NM_023214	Slc30a7	chr3:115641890-115710324	2.53391
1159	NM_023230	Ube2v1	chr2:167433138-167457505	3.38316
1160	NM_023247	Ndufaf3	chr9:108468195-108469673	2.43325
1161	NM_023249	Ypel1	chr16:17070403-17111345	2.18665
1162	NM_023290	Mkrn2	chr6:115551955-115626653	2.88804
1163	NM_023305	Ubap1	chr4:41296028-41336799	2.32835
1164	NM_023322	Zkscan14	chr5:145955814-145962751	2.08376
1165	NM_023328	Agtpbp1	chr13:59550895-59658680	3.92375
1166	NM_023363	Zfp788	chr7:48888900-48906902	2.18989
1167	NM_023431	Mum1	chr10:79689342-79707889	3.22268
1168	NM_023434	Tox4	chr14:52881433-52924799	2.60024
1169	NM_023479	Elac2	chr11:64792536-64976463	3.50431
1170	NM_023483	1110032A03Rik	chr9:50570932-50576257	2.28054
1171	NM_023579	Ipo5	chr14:121310415-121347266	2.71384
1172	NM_023597	Wdr31	chr4:62114767-62131906	2.7264
1173	NM_023617	Aox3	chr1:58169979-58257296	2.2903
1174	NM_023625	Plbd2	chr5:120926555-120953632	2.60259
1175	NM_023626	Ing3	chr6:21899614-21926037	2.1722
1176	NM_023630	Gtf2a1l	chr17:89067999-89114490	3.24155
1177	NM_023631	Aox4	chr1:58267240-58325440	4.79746
1178	NM_023670	Igf2bp3	chr6:49035216-49164953	2.07524
1179	NM_023670	Igf2bp3	chr6:49035216-49164953	2.07524
1180	NM_023727	Rd3	chr1:193801253-193812163	3.34131
1181	NM_023732	Abcb6	chr1:75168214-75176857	2.88585
1182	NM_023764	Tollip	chr7:149067489-149088311	2.53349
1183	NM_023816	Ankrd36	chr11:5469686-5589340	2.67957
1184	NM_023831	Ift46	chr9:44581091-44600797	2.50755
1185	NM_023850	Chst1	chr2:92439863-92455409	2.51117
1186	NM_023858	Mtmr2	chr9:13553624-13610925	3.00265
1187	NM_023908	Slco3a1	chr7:81420303-81699666	2.01841
1188	NM_024179	0610009O20Rik	chr18:38398058-38422283	3.85723
1189	NM_024199	Cstf1	chr2:172196502-172206586	4.89535
1190	NM_024203	Fam120b	chr17:15533165-15570545	3.45008
1191	NM_024222	Stt3b	chr9:115151699-115219539	3.41436
1192	NM_024229	Pcyt2	chr11:120471400-120479204	2.12985
1193	NM_024241	Kif24	chr4:41337780-41411881	3.55225
1194	NM_024245	Kif23	chr9:61765084-61794606	2.05811
1195	NM_024263	Mxra8	chr4:155213788-155218211	3.6254
1196	NM_024274	Fars2	chr13:36209279-36629462	2.99427
1197	NM_024445	Tsnaxip1	chr8:108351643-108368576	4.332
1198	NM_024472	Gltpd1	chr4:155238831-155243549	5.15057
1199	NM_024477	Ttc28	chr5:111308821-111718799	2.69013
1200	NM_024499	Sgta	chr10:80506817-80522899	3.85958
1201	NM_025271	Actl7b	chr4:56752876-56754297	2.41178
1202	NM_025275	Amz2	chr11:109287259-109299462	3.70394
1203	NM_025289	Tbrg1	chr9:37456766-37464897	3.16045
1204	NM_025298	Polr3e	chr7:128061257-128090946	4.17524
1205	NM_025414	Myo19	chr11:84689814-84729858	3.64658
1206	NM_025428	Zdhhc12	chr2:29934285-29949155	2.56888
1207	NM_025445	Arfgap3	chr15:83130169-83180677	2.59474
1208	NM_025449	Nicn1	chr9:108192787-108198827	2.01231
1209	NM_025481	Smurf2	chr11:106681377-106782029	2.51172
1210	NM_025500	Mrpl37	chr4:106728478-106739471	2.36297
1211	NM_025504	Atp5sl	chr7:26404511-26410569	2.12293
1212	NM_025518	Dus2l	chr8:108535406-108577719	2.80475
1213	NM_025578	Mrps25	chr6:92041411-92134017	2.08259
1214	NM_025610	Asrgl1	chr19:9186208-9210056	3.298
1215	NM_025651	Aste1	chr9:105297721-105308086	3.87471
1216	NM_025680	Ctnnbl1	chr2:157563136-157717639	3.19497
1217	NM_025691	Srp72	chr5:77403725-77428960	2.70557
1218	NM_025709	Gapvd1	chr2:34532501-34610752	2.40824
1219	NM_025717	Rbm4b	chr19:4756524-4765940	2.13408
1220	NM_025721	Spesp1	chr9:62118535-62129986	2.42373
1221	NM_025727	Klhl10	chr11:100303237-100318338	2.7852
1222	NM_025731	Hrasls5	chr19:7687058-7713728	2.68537
1223	NM_025732	Ankrd61	chr5:144578660-144670708	2.67701
1224	NM_025734	Kcng4	chr8:122147753-122159580	3.08534
1225	NM_025741	Trpd52l3	chr19:30078279-30080510	3.00714
1226	NM_025746	4933415F23Rik	chr1:23107312-23109092	3.05551
1227	NM_025747	4933411K20Rik	chr8:47254909-47280944	3.15782
1228	NM_025749	Zfp474	chr18:52775568-52799484	2.07839
1229	NM_025752	4933411K16Rik	chr19:42120340-42145429	2.73372
1230	NM_025778	Bcl2l14	chr6:134346346-134388742	2.6957
1231	NM_025789	Rsph3a	chr17:8138478-8172421	3.41327
1232	NM_025808	Lztr1	chr16:17509063-17526423	2.04015
1233	NM_025827	Lonp2	chr8:89147941-89240535	2.82477
1234	NM_025830	Wwp2	chr8:109960297-110082495	2.87946
1235	NM_025837	Mpi	chr9:57392074-57400559	2.19721
1236	NM_025851	1700010I14Rik	chr17:9181197-9201184	4.13975
1237	NM_025898	Napa	chr7:16683991-16703324	4.26106
1238	NM_025919	Rpl11	chr4:135605862-135609286	2.41353
1239	NM_025920	Thap4	chr1:95601967-95651415	2.5153
1240	NM_025943	Dzip1	chr14:119274741-119322389	2.46567
1241	NM_025977	Ccdc159	chr9:21725452-21740316	2.50067
1242	NM_026037	Mboat2	chr12:25516463-25645164	2.83197
1243	NM_026078	Pigc	chr1:163872219-163909767	2.39717
1244	NM_026094	Atp8b3	chr10:79982329-80001869	6.09153
1245	NM_026097	Rffl	chr11:82594636-82684712	4.20093
1246	NM_026103	Vsig1	chrX:137442146-137474011	2.51969
1247	NM_026107	Zkscan6	chr11:65620745-65642741	2.61982
1248	NM_026137	Wdr13	chrX:7700426-7709984	2.81016
1249	NM_026143	Far1	chr7:120657375-120713972	3.13351
1250	NM_026143	Far1	chr7:120657375-120713972	3.13351
1251	NM_026143	Far1	chr7:120657375-120713972	3.13351
1252	NM_026168	Ergic2	chr6:147995937-148392874	2.00131
1253	NM_026174	Entpd4	chr14:69955207-69984799	2.63706
1254	NM_026175	Sf3a1	chr11:4060356-4082544	2.0286
1255	NM_026180	Abcg8	chr17:85082470-85099673	3.60009
1256	NM_026184	Ero1lb	chr13:12658149-12701795	2.1888
1257	NM_026187	Ankzf1	chr1:75188708-75207353	3.66819
1258	NM_026193	Ap4b1	chr3:103613439-103625948	3.25557
1259	NM_026203	Ahi1	chr10:20672352-20800235	2.70201
1260	NM_026229	Gpr89	chr3:96674988-96709221	3.01973
1261	NM_026236	Wdr48	chr9:119804012-119846676	3.8538
1262	NM_026238	Narfl	chr17:25910720-25922278	3.27331
1263	NM_026253	Lrrc18	chr14:33772732-33998252	2.88201
1264	NM_026257	Ubxn11	chr4:133658497-133682695	3.46932
1265	NM_026260	Tctn3	chr19:40670935-40686705	2.32944
1266	NM_026273	4930453N24Rik	chr16:64765930-64770765	2.59265
1267	NM_026298	Ift172	chr5:31555651-31593487	2.69058
1268	NM_026301	Rnf125	chr18:21103125-21142349	2.13106
1269	NM_026302	Dctn4	chr18:60685874-60718416	3.76052
1270	NM_026343	Stx17	chr4:48137790-48199378	2.83862
1271	NM_026350	Ccdc130	chr8:86781693-86794259	3.17753
1272	NM_026351	Ttc39d	chr17:80615253-80617276	2.64527
1273	NM_026355	Ergic2	chr6:147995937-148392874	3.03879
1274	NM_026359	4930578I06Rik	chr14:64589958-64606617	2.09593
1275	NM_026361	Pkp4	chr2:58998906-59193262	3.73738
1276	NM_026364	Prpsap1	chr11:116332129-116351660	2.1629
1277	NM_026365	Jagn1	chr6:113392510-113398223	4.55471
1278	NM_026410	Cdca5	chr19:6085096-6091773	3.41196
1279	NM_026449	Galntl5	chr5:24687297-24726107	3.4146
1280	NM_026457	Spert	chr14:75982640-75992923	2.88724
1281	NM_026458	Abca14	chr7:127347477-127468866	2.60718
1282	NM_026486	Tctn2	chr5:125048757-125077658	3.04798
1283	NM_026500	Ddx59	chr1:138308492-138336797	2.44157
1284	NM_026508	Trap1	chr16:4037144-4077810	2.41132
1285	NM_026514	Cdc42ep3	chr17:79733364-79754431	2.01439
1286	NM_026538	Ddx56	chr11:6157547-6167732	3.26968
1287	NM_026539	Chd1l	chr3:97364670-97414113	2.54275
1288	NM_026542	Slc25a39	chr11:102264294-102268831	2.60377
1289	NM_026543	3010026O09Rik	chr11:49988352-50013617	2.042
1290	NM_026604	Fam135a	chr1:24017596-24107180	2.05994
1291	NM_026624	Fam166a	chr2:25074264-25080222	2.7454
1292	NM_026651	Pomgnt1	chr4:115823122-115832449	2.72039
1293	NM_026653	Rpa1	chr11:75113760-75161885	4.0203
1294	NM_026664	Vps53	chr11:75859727-75993132	2.26114
1295	NM_026666	Ubn1	chr16:5050160-5086378	2.2962
1296	NM_026668	Lrriq4	chr3:30523188-30571353	3.00872
1297	NM_026674	Aph1c	chr9:66662800-66682513	2.23761
1298	NM_026681	Ccdc88c	chr12:102150909-102267193	5.20611
1299	NM_026689	Mul1	chr4:137990586-137998180	2.23793
1300	NM_026718	Ankrd13a	chr5:115225148-115255829	3.37346
1301	NM_026739	9530077C05Rik	chr9:22216020-22249123	2.35859
1302	NM_026748	Ints1	chr5:140227235-140251632	3.39804
1303	NM_026775	Tmed10	chr12:86681563-86715667	2.25431
1304	NM_026789	Wdr65	chr4:118227300-118293010	3.15278
1305	NM_026799	Drosha	chr15:12754569-12865046	2.27569
1306	NM_026813	Ppp6r2	chr15:89041989-89116692	2.13107
1307	NM_026819	Dhrs1	chr14:56357856-56364521	2.20801
1308	NM_026837	Tmem53	chr4:116924593-116941185	2.05491
1309	NM_026842	Ubqln1	chr13:58277516-58317014	2.57079
1310	NM_026859	Maf1	chr15:76181723-76184808	2.82226
1311	NM_026861	Ubac2	chr14:122277827-122420257	2.35351
1312	NM_026861	Ubac2	chr14:122277827-122420257	2.35351
1313	NM_026872	Ubap2	chr4:41141347-41222168	5.28509
1314	NM_026873	Ptcd2	chr13:100089603-100114633	2.82433
1315	NM_026888	Phkg2	chr7:134716861-134732109	3.00948
1316	NM_026893	Dcaf12	chr4:41238332-41261934	2.43572
1317	NM_026917	Zdhhc3	chr9:122981427-123022323	2.80134
1318	NM_026921	Isca1	chr13:59856775-59871150	2.00334
1319	NM_026969	Sec31a	chr5:100790667-100845253	3.33759
1320	NM_027019	Odf3	chr7:148033814-148036824	2.0613
1321	NM_027041	1700003M02Rik	chr4:34658580-34677455	4.29427
1322	NM_027046	Ccdc54	chr16:50589971-50654279	2.6159
1323	NM_027053	Lrrc51	chr7:109061502-109082371	2.15757
1324	NM_027057	Wdfy1	chr1:79698836-79758344	3.99085
1325	NM_027058	1700017D01Rik	chr19:11171305-11205368	2.3203
1326	NM_027061	Zpbp2	chr11:98412410-98419979	2.30632
1327	NM_027063	1700013G24Rik	chr4:137009210-137011376	2.69926
1328	NM_027086	Ubl7	chr9:57758792-57777775	3.73533
1329	NM_027088	Bap1	chr14:32064674-32073115	3.25361
1330	NM_027100	Rwdd2a	chr9:86465594-86468506	2.19399
1331	NM_027103	1700030J22Rik	chr8:119493498-119502843	2.93861
1332	NM_027113	Wdr5b	chr16:36041275-36043060	3.20589
1333	NM_027123	Fastkd3	chr13:68721124-68731156	2.81837
1334	NM_027144	Arhgef12	chr9:42771924-42913801	2.27067
1335	NM_027151	Dctn2	chr10:126703317-126725827	2.17546
1336	NM_027164	Lrrc27	chr7:146289536-146428872	3.98343
1337	NM_027187	Rnaseh2a	chr8:87480508-87489910	4.29079
1338	NM_027195	Casz1	chr4:148178500-148329001	3.38472
1339	NM_027195	Casz1	chr4:148178500-148329001	3.38472
1340	NM_027256	Ints4	chr7:104629465-104689908	3.30952
1341	NM_027258	Rnf157	chr11:116197658-116274346	3.85916
1342	NM_027264	Zfp715	chr7:50551892-50568631	2.52978
1343	NM_027287	Dnajb4	chr3:151846918-151873263	2.40163
1344	NM_027306	Zdhhc25	chr15:88430731-88431972	3.27653
1345	NM_027373	Afap1	chr5:36235967-36346571	2.07422
1346	NM_027389	Gon4l	chr3:88639152-88717872	4.1517
1347	NM_027394	Ube2cbp	chr9:86200840-86358523	2.34333
1348	NM_027456	Armc9	chr1:88051354-88174859	2.73913
1349	NM_027475	Ecd	chr14:21139080-21167343	2.33932
1350	NM_027477	Zfp398	chr6:47785659-47818256	5.745
1351	NM_027481	Sugp1	chr8:72566711-72595852	2.6849
1352	NM_027485	Med26	chr8:75018457-75072209	2.64607
1353	NM_027498	Sik3	chr9:45820902-46032277	4.16516
1354	NM_027513	Nup205	chr6:35127615-35197598	2.61486
1355	NM_027564	4921507P07Rik	chr6:50516641-50546589	2.75443
1356	NM_027572	Slc22a16	chr10:40290167-40323938	2.00605
1357	NM_027581	Lrrc63	chr14:75484109-75530690	2.82958
1358	NM_027587	Micalcl	chr7:119511821-119556618	3.65129
1359	NM_027588	Nt5c1b	chr12:10376776-10396980	3.3156
1360	NM_027590	Ints10	chr8:71317852-71351543	3.62761
1361	NM_027594	Ttll7	chr3:146515330-146645714	2.33816
1362	NM_027599	Lpcat2b	chr5:107860567-107864058	4.33652
1363	NM_027602	Nsun7	chr5:66651363-66689255	3.85475
1364	NM_027604	Usp15	chr10:122550299-122633979	3.37267
1365	NM_027614	Wdr20b	chr12:66326503-66329441	3.56198
1366	NM_027634	4931431F19Rik	chr7:111276426-111278337	3.03042
1367	NM_027640	Prss54	chr8:98083191-98099097	2.18852
1368	NM_027656	Zbtb46	chr2:181125590-181194131	3.58569
1369	NM_027660	Tekt3	chr11:62875160-62908462	3.09075
1370	NM_027678	Zranb3	chr1:129850762-129998985	2.41018
1371	NM_027687	Cabyr	chr18:12899863-12913651	3.6975
1372	NM_027689	Rfx4	chr10:84218792-84369283	2.49079
1373	NM_027704	Zdhhc11	chr13:74101309-74130288	2.4997
1374	NM_027706	Nbas	chr12:13275932-13590617	3.50301
1375	NM_027707	Nipbl	chr15:8241224-8394463	2.80383
1376	NM_027721	Katnal2	chr18:77231938-77286035	2.67755
1377	NM_027722	Nudt4	chr10:95009640-95026801	2.71891
1378	NM_027727	Dym	chr18:75178425-75446620	2.64424
1379	NM_027740	Poc1b	chr10:98569804-98660622	2.25447
1380	NM_027748	Taf3	chr2:9836178-9970236	2.39698
1381	NM_027787	Rfx2	chr17:56915319-56970431	7.07366
1382	NM_027815	9030624J02Rik	chr7:125883784-125985005	2.85685
1383	NM_027830	Mcm9	chr10:53257129-53350245	2.98188
1384	NM_027839	Ceacam20	chr7:20550760-20576460	3.94978
1385	NM_027857	Acy3	chr19:3986660-3990005	2.80197
1386	NM_027868	Slc41a3	chr6:90554873-90596406	2.55048
1387	NM_027868	Slc41a3	chr6:90554873-90596406	2.55048
1388	NM_027873	Ubiad1	chr4:147808605-147818860	2.46606
1389	NM_027883	Dhx34	chr7:16782569-16807381	2.4887
1390	NM_027884	Tns1	chr1:73956804-74171021	3.68468
1391	NM_027889	Vps11	chr9:44156187-44169753	2.5769
1392	NM_027891	Lrwd1	chr5:136598935-136611944	2.73854
1393	NM_027901	Gtf3c2	chr5:31458378-31482517	3.10837
1394	NM_027909	C2cd2l	chr9:44117319-44128365	2.44301
1395	NM_027915	Ap2b1	chr11:83116198-83218535	4.23523
1396	NM_027918	1300017J02Rik	chr9:103152859-103190627	2.05166
1397	NM_027931	Tars2	chr3:95543896-95558900	3.3914
1398	NM_027933	Ranbp3	chr17:56812647-56851192	3.22553
1399	NM_027941	Lrrc34	chr3:30523188-30571353	2.38925
1400	NM_027942	Ddi1	chr9:6168611-6377519	2.05183
1401	NM_027945	Csl	chr10:99220338-99222292	2.49605
1402	NM_027949	Phf7	chr14:32050881-32064404	5.30232
1403	NM_027950	Osgin1	chr8:121961061-121970156	3.16589
1404	NM_027951	Tekt4	chr17:25608534-25613539	2.22607
1405	NM_027952	1700008I05Rik	chrX:132189236-132228329	2.77488
1406	NM_027957	Fam178b	chr1:36619540-36740028	2.29596
1407	NM_027960	Dpep3	chr8:108497419-108503319	3.2388
1408	NM_027965	Gpr160	chr3:30754871-30796114	3.31501
1409	NM_027966	1700019O17Rik	chr1:88322903-88324624	2.24798
1410	NM_027970	1700023E05Rik	chr5:77445047-77490547	2.92847
1411	NM_027973	Mlf1ip	chr8:47637422-47702554	2.07715
1412	NM_027974	Efhc1	chr1:20941706-20980922	4.48171
1413	NM_027980	2310003H01Rik	chr11:120230875-120240060	3.89451
1414	NM_027982	Ppm1j	chr3:104583973-104588935	2.88461
1415	NM_027985	Mad2l2	chr4:147514598-147519805	2.75773
1416	NM_027994	Cand1	chr10:118635867-118677111	2.92263
1417	NM_028014	2310067B10Rik	chr11:115626746-115660347	4.91793
1418	NM_028024	Nkiras2	chr11:100484268-100512007	3.43177
1419	NM_028028	Zswim1	chr2:164648185-164652367	3.866
1420	NM_028050	1600016N20Rik	chr7:148380028-148399979	3.69664
1421	NM_028054	Zfyve19	chr2:118998235-119042786	4.14722
1422	NM_028059	Zfp654	chr16:64780172-64786147	3.47147
1423	NM_028077	1810055G02Rik	chr19:3708332-3717881	4.70138
1424	NM_028079	2010111I01Rik	chr13:63116293-63400964	2.54182
1425	NM_028083	Chaf1b	chr16:93884145-93906351	2.70085
1426	NM_028087	Gcnt3	chr9:69879302-69885895	2.69216
1427	NM_028091	Osgepl1	chr1:53370506-53380908	2.51792
1428	NM_028126	Strada	chr11:106024287-106054917	2.61996
1429	NM_028131	Cenpn	chr8:119445639-119465403	3.56239
1430	NM_028146	Dbndd1	chr8:126028617-126039355	3.03833
1431	NM_028152	Mms19	chr19:42007961-42055626	2.61142
1432	NM_028162	Tbc1d5	chr17:50872451-51318674	2.90395
1433	NM_028170	1700030K09Rik	chr8:74967778-74999132	3.04807
1434	NM_028186	Nkd2	chr13:73956775-73985079	2.7162
1435	NM_028194	Fryl	chr5:73411429-73647857	2.65289
1436	NM_028198	Xpo5	chr17:46339803-46379248	3.40108
1437	NM_028199	Plxdc1	chr11:97784550-97847760	3.42471
1438	NM_028216	Psca	chr15:74545268-74547495	2.07869
1439	NM_028227	Brap	chr5:122110594-122137256	3.21407
1440	NM_028234	Rbm33	chr5:28643728-28745782	2.37708
1441	NM_028279	Naalad2	chr9:18127464-18190372	2.07235
1442	NM_028291	Pan3	chr5:148242155-148360077	3.86471
1443	NM_028326	Zfp618	chr4:62626607-62795064	3.32889
1444	NM_028349	Sass6	chr3:116265890-116333902	2.5195
1445	NM_028354	Tdp1	chr12:101122724-101193426	2.90481
1446	NM_028364	Puf60	chr15:75900611-75911376	3.39332
1447	NM_028379	Zdhhc4	chr5:144078167-144090917	2.80674
1448	NM_028384	Ccdc13	chr9:121706744-121748579	2.65234
1449	NM_028412	Ciz1	chr2:32218529-32233833	4.22885
1450	NM_028447	Prrc1	chr18:57514386-57552373	2.26738
1451	NM_028451	Larp1	chr11:57822565-57875534	3.96301
1452	NM_028475	Ubap2l	chr3:89802681-89856437	2.95728
1453	NM_028509	1700034J05Rik	chr6:146837015-146980545	3.55439
1454	NM_028513	Actrt2	chr4:154040536-154041976	3.11406
1455	NM_028514	Actrt1	chrX:43682183-43683522	2.72448
1456	NM_028521	Phospho2	chr2:69627793-69635225	3.34199
1457	NM_028547	Kif2b	chr11:91436599-91438869	4.80083
1458	NM_028550	1700074P13Rik	chr6:40870458-40890556	3.08446
1459	NM_028601	Zmiz2	chr11:6289366-6306165	5.54412
1460	NM_028636	Man2c1	chr9:56978583-56990017	2.63256
1461	NM_028655	Satl1	chrX:109497913-109520388	2.57761
1462	NM_028679	Irak3	chr10:119578709-119638593	3.49158
1463	NM_028679	Irak3	chr10:119578709-119638593	3.49158
1464	NM_028713	Rftn2	chr1:55227003-55283626	2.04124
1465	NM_028735	Ttc21a	chr9:119846723-119876911	3.94879
1466	NM_028791	Ftsjd2	chr17:29797545-29853962	2.25393
1467	NM_028800	Stk40	chr4:125781200-125818273	2.81979
1468	NM_028805	Katnb1	chr8:97605100-97666440	3.1252
1469	NM_028816	Xpo6	chr7:133245232-133343922	3.76872
1470	NM_028820	1700017B05Rik	chr9:57100128-57110406	3.76994
1471	NM_028829	Paqr8	chr1:20880702-20928837	2.67719
1472	NM_028833	Iqce	chr5:141139458-141178332	3.12247
1473	NM_028835	Atg7	chr6:114593118-114810632	3.99894
1474	NM_028846	Usp20	chr2:30837798-30878175	3.51442
1475	NM_028851	1700080O16Rik	chrX:49321871-49325949	2.32818
1476	NM_028854	Tbc1d21	chr9:58207610-58218176	2.58608
1477	NM_028860	Mtmr3	chr11:4380870-4494818	2.0957
1478	NM_028874	Snx19	chr9:30234913-30274311	3.11791
1479	NM_028875	Xrcc3	chr12:112997059-113052052	2.36314
1480	NM_028883	4632415K11Rik	chr8:122284486-122302316	2.22739
1481	NM_028892	Spag17	chr3:99689339-99966326	4.25278
1482	NM_028897	Mei1	chr15:81900546-81957244	2.37584
1483	NM_028901	Myo18b	chr5:113117895-113325382	2.22807
1484	NM_028905	4932438H23Rik	chr16:91054179-91069390	2.51476
1485	NM_028906	Dpp8	chr9:64880264-64930458	2.29237
1486	NM_028908	4933403G14Rik	chr8:128193717-128197265	2.00004
1487	NM_028913	Zfp819	chr7:50862538-50873649	2.40157
1488	NM_028918	Ttc25	chr11:100406945-100433880	3.29245
1489	NM_028923	Gle1	chr2:29790928-29814952	2.79177
1490	NM_028925	Polr3c	chr3:96515817-96531362	3.57229
1491	NM_028927	Tktl2	chr8:69035638-69037677	2.60011
1492	NM_028930	Tmc5	chr7:125740810-125818599	3.99034
1493	NM_028934	4930452B06Rik	chr14:9263685-9498804	2.32657
1494	NM_028938	Lrriq3	chr3:154756397-154857242	2.0345
1495	NM_028943	Sgms2	chr3:131021903-131047841	3.3243
1496	NM_028947	Arl13a	chrX:130722039-130742569	2.49953
1497	NM_028955	4933427G17Rik	chr7:128126022-128158301	2.16728
1498	NM_028959	Cep72	chr13:74173942-74199733	2.85124
1499	NM_028961	4933433C11Rik	chr2:25068078-25070150	2.06271
1500	NM_028980	Ppp4r4	chr12:104770774-104852042	2.79809
1501	NM_028982	8430419L09Rik	chr6:135148004-135186258	2.73985
1502	NM_028993	Mau2	chr8:72540021-72566633	2.92592
1503	NM_028999	Ppp6r3	chr19:3454927-3575749	3.16003
1504	NM_029010	Glb1l	chr1:75188708-75207353	3.91439
1505	NM_029020	Abcb8	chr5:23899973-23915765	2.4052
1506	NM_029035	Spsb1	chr4:149270392-149329115	2.90598
1507	NM_029044	Lrrc48	chr11:60166881-60207835	2.00329
1508	NM_029045	4930432K21Rik	chr8:86671936-86696496	3.90403
1509	NM_029064	Ttll9	chr2:152788220-152834218	4.14893
1510	NM_029069	Fam71d	chr12:79792521-79835506	3.5162
1511	NM_029141	4930511M11Rik	chr5:3657003-3679544	2.23091
1512	NM_029150	Spata16	chr3:26536552-26882134	4.37337
1513	NM_029160	Spag16	chr1:69873561-70771706	2.61196
1514	NM_029163	Usp50	chr2:126586785-126609196	2.97069
1515	NM_029166	Uhrf1bp1l	chr10:89207735-89282614	2.48557
1516	NM_029212	Ccdc33	chr9:57876488-57966630	3.03577
1517	NM_029245	Ankrd53	chr6:83712639-83718320	2.19979
1518	NM_029252	4930563D23Rik	chr16:92319007-92321686	2.45219
1519	NM_029264	Ttll10	chr4:155408945-155424926	2.18822
1520	NM_029279	Secisbp2	chr13:51747082-51779015	2.64916
1521	NM_029282	Tti1	chr2:157807538-157835096	2.71724
1522	NM_029291	Ascc2	chr11:4537795-4583388	5.31946
1523	NM_029308	1700010B08Rik	chr2:173544915-173547587	2.57601
1524	NM_029334	Zc3h14	chr12:99985177-100139694	2.57919
1525	NM_029337	Ep400	chr5:111093391-111199736	5.01119
1526	NM_029339	Ccdc101	chr7:133792822-133816293	2.21989
1527	NM_029364	Gns	chr10:120802145-120834301	2.5311
1528	NM_029365	Med25	chr7:52134755-52147736	3.74808
1529	NM_029401	Vwa5b1	chr4:138124883-138179907	3.68223
1530	NM_029416	Klf17	chr4:117429263-117438271	2.40359
1531	NM_029430	Ttc23l	chr15:10433701-10488423	2.60066
1532	NM_029453	Wdr64	chr1:177628723-177745864	3.52075
1533	NM_029459	Prame	chrX:132147540-132162244	3.29758
1534	NM_029467	Tcam1	chr11:106137985-106149457	2.42074
1535	NM_029468	Zfp821	chr8:112229448-112248832	2.44587
1536	NM_029472	Gstt4	chr10:75277688-75285288	4.61554
1537	NM_029505	Ap3m2	chr8:23897825-23916126	2.43702
1538	NM_029522	Gpsm2	chr3:108456830-108525217	2.13707
1539	NM_029581	Mtif3	chr5:147760232-147775373	2.44361
1540	NM_029585	Det1	chr7:85972359-85992097	3.12313
1541	NM_029598	1700019B03Rik	chr8:3470861-3487178	2.46088
1542	NM_029624	Lmf1	chr17:25716118-25799771	3.69344
1543	NM_029640	Trappc9	chr15:72420049-72891634	3.67336
1544	NM_029654	Atg2b	chr12:106851748-106923451	2.35525
1545	NM_029663	Eef1d	chr15:75725229-75739770	2.03043
1546	NM_029665	Ipo11	chr13:107584518-107726995	2.1577
1547	NM_029673	Immt	chr6:71781313-71825260	3.35258
1548	NM_029681	Wbscr28	chr5:135377463-135382603	2.56322
1549	NM_029696	Mdh1b	chr1:63745400-63776892	2.77383
1550	NM_029698	Ttc18	chr14:21213411-21271447	3.3562
1551	NM_029709	Clasp1	chr1:120285634-120506039	3.14496
1552	NM_029714	Catsperg2	chr7:30482237-30512034	2.72357
1553	NM_029735	Eprs	chr1:187186973-187252234	3.41359
1554	NM_029749	Usp42	chr5:144471194-144493149	2.92312
1555	NM_029766	Dtl	chr1:193361243-193399413	2.1139
1556	NM_029774	Ttll11	chr2:35606759-35835144	3.02901
1557	NM_029779	Ccdc116	chr16:17139156-17144516	3.44903
1558	NM_029781	Rab36	chr10:74499833-74516845	3.48993
1559	NM_029858	Ston1	chr17:89025894-89045064	3.22408
1560	NM_029911	Kcnk10	chr12:99672203-99816150	3.23576
1561	NM_029924	Mbd5	chr2:48805027-49172589	2.92569
1562	NM_029937	Nup210l	chr3:89908053-90015939	3.69567
1563	NM_029988	Pigh	chr12:80130149-80190657	2.22461
1564	NM_030068	Iqch	chr9:63269427-63450255	3.58223
1565	NM_030084	Gpr108	chr17:57374337-57387064	3.23289
1566	NM_030113	Arhgap10	chr8:79774264-80042477	2.19008
1567	NM_030141	1700061G19Rik	chr17:57015055-57028261	3.6087
1568	NM_030150	Dhx58	chr11:100556197-100565585	2.643
1569	NM_030176	Spata2l	chr8:125756157-125778075	2.17135
1570	NM_030178	Brpf1	chr6:113257190-113274698	2.64811
1571	NM_030178	Brpf1	chr6:113257190-113274698	2.64811
1572	NM_030179	Clip4	chr17:72119030-72207691	4.73135
1573	NM_030184	Armc9	chr1:88051354-88174859	2.25735
1574	NM_030192	4930562C15Rik	chr16:4835415-4867691	4.61613
1575	NM_030201	Hspa13	chr16:75755435-75767063	2.59924
1576	NM_030205	Coro7	chr16:4626883-4679720	3.07505
1577	NM_030205	Coro7	chr16:4626883-4679720	3.07505
1578	NM_030219	Trim42	chr9:97249980-97270377	3.9142
1579	NM_030221	Nadsyn1	chr7:150981498-151008746	2.90362
1580	NM_030225	Dlst	chr12:86451782-86475041	3.26471
1581	NM_030231	Agbl4	chr4:110070395-111330115	3.33008
1582	NM_030237	Spz1	chr13:93344586-93346187	3.8899
1583	NM_030238	Dync1h1	chr12:111839604-111905154	5.22399
1584	NM_030248	Cdk5rap3	chr11:96769099-96777795	2.22262
1585	NM_030558	Car15	chr16:17835368-17838279	2.44773
1586	NM_030595	Nbea	chr3:55429119-55987623	2.60672
1587	NM_030595	Nbea	chr3:55429119-55987623	2.60672
1588	NM_030690	Rai14	chr15:10498732-10644386	2.74632
1589	NM_030713	Zfp202	chr9:39999900-40021189	2.63681
1590	NM_030721	Acox3	chr5:35923875-35956450	4.5437
1591	NM_030728	9930013L23Rik	chr7:91081366-91235015	2.15984
1592	NM_030730	Rad54l2	chr9:106590410-106691544	2.74169
1593	NM_030749	Sil1	chr18:35426049-35658579	2.29327
1594	NM_030886	Ankrd17	chr5:90656190-90795211	5.01822
1595	NM_031156	Ide	chr19:37343230-37405103	3.17196
1596	NM_031170	Krt8	chr15:101827141-101834773	2.21215
1597	NM_031172	Trim17	chr11:58777282-58785231	2.9389
1598	NM_031177	Ift122	chr6:115803545-115876717	3.96369
1599	NM_031180	Klb	chr5:65739649-65775242	4.57752
1600	NM_031185	Akap12	chr10:5987069-6080212	2.55339
1601	NM_031186	Ndst3	chr3:123229083-123375310	2.91296
1602	NM_031190	Pgk2	chr17:40343962-40345554	3.1402
1603	NM_032396	Kremen1	chr11:5091555-5161613	2.91349
1604	NM_032543	Rnf123	chr9:107951620-107981706	4.20472
1605	NM_033077	D1Pas1	chr1:188791294-188794506	2.01519
1606	NM_033134	Inpp5e	chr2:26244867-26264708	3.58787
1607	NM_033217	Ngfr	chr11:95430139-95449012	2.93329
1608	NM_033374	Dock2	chr11:34126863-34597325	2.47423
1609	NM_033374	Dock2	chr11:34126863-34597325	2.47423
1610	NM_033374	Dock2	chr11:34126863-34597325	2.47423
1611	NM_033570	Cnnm4	chr1:36528441-36565621	3.92253
1612	NM_033609	Med15	chr16:17651313-17723023	4.88129
1613	NM_052976	Ophn1	chrX:95752853-96086324	2.45326
1614	NM_053014	Agpat3	chr10:77734307-77814445	2.08151
1615	NM_053072	Fgd6	chr10:93498745-93608084	3.17799
1616	NM_053092	Kars	chr8:114517339-114535205	3.8894
1617	NM_053155	Clmn	chr12:106001323-106103286	3.40743
1618	NM_053156	Allc	chr12:29238619-29267348	2.21172
1619	NM_053180	Cdk20	chr13:64533860-64541029	2.95137
1620	NM_053180	Cdk20	chr13:64533860-64541029	2.95137
1621	NM_053181	Pdxdc1	chr16:13819369-13903228	3.549
1622	NM_053266	Gtf2ird2	chr5:134659907-134694013	2.71217
1623	NM_054040	Tulp4	chr17:6106829-6240637	3.02666
1624	NM_054050	Rapgef1	chr2:29475239-29595883	5.28785
1625	NM_054078	Baz2a	chr10:127529838-127566359	3.53083
1626	NM_054081	Mta1	chr12:114336488-114375417	4.00107
1627	NM_054081	Mta1	chr12:114336488-114375417	4.00107
1628	NM_054093	Ube3b	chr5:114830615-114871175	5.09503
1629	NM_054095	Necab2	chr8:121970618-121996535	2.07236
1630	NM_054097	Pip4k2c	chr10:126627433-126648678	2.04147
1631	NM_054102	Ivns1abp	chr1:153191627-153211575	3.60176
1632	NM_054103	Stk33	chr7:116422729-116582567	2.89244
1633	NM_057171	Bag6	chr17:35272122-35284267	5.51419
1634	NM_058212	Dpf3	chr12:84370184-84828658	3.04096
1635	NM_078478	Ghitm	chr14:37933631-37948508	2.85716
1636	NM_080287	Elmo2	chr2:165113530-165151979	2.46813
1637	NM_080428	Fbxw7	chr3:84619498-84783120	2.49799
1638	NM_080510	Trim69	chr2:121945843-122011925	3.54791
1639	NM_080561	Rnf216	chr5:143752571-143874699	3.47336
1640	NM_080595	Emid1	chr11:5006268-5052225	2.1204
1641	NM_080633	Aco2	chr15:81702892-81756643	3.62591
1642	NM_080635	Eif3h	chr15:51618108-51697007	2.16327
1643	NM_080788	Ttbk2	chr2:120558551-120676320	3.36081
1644	NM_080795	Lnx2	chr5:147828230-147888148	2.38284
1645	NM_080847	Asb15	chr6:24478143-24523164	2.47378
1646	NM_080849	Nek8	chr11:77979607-77990168	2.33329
1647	NM_080850	Pask	chr1:95206013-95239365	2.93175
1648	NM_080855	Zcchc14	chr8:124122602-124175833	4.05788
1649	NM_080858	Asb12	chrX:92665537-92673468	3.4236
1650	NM_126165	Vps4a	chr8:109555225-109569656	2.21128
1651	NM_130447	Dusp16	chr6:134665490-134742646	2.63878
1652	NM_130454	Recql5	chr11:115753908-115794806	2.23145
1653	NM_130862	Baiap2	chr11:119804405-119868096	3.15956
1654	NM_130884	Idh3b	chr2:130100147-130110187	2.224
1655	NM_133191	Eps8l2	chr7:148524900-148551009	3.43338
1656	NM_133201	Mfn2	chr4:147247703-147278928	4.18496
1657	NM_133215	Mtmr4	chr11:87405718-87429798	2.94422
1658	NM_133215	Mtmr4	chr11:87405718-87429798	2.94422
1659	NM_133224	Atp13a1	chr8:72315061-72331647	2.44377
1660	NM_133236	Glcci1	chr6:8459595-8547548	2.37216
1661	NM_133347	Dhx30	chr9:109986822-110020120	6.1636
1662	NM_133348	Acot7	chr4:151552208-151645964	3.85113
1663	NM_133360	Acaca	chr11:84008939-84215153	3.80158
1664	NM_133442	Grip1	chr10:118891369-119512649	3.84422
1665	NM_133648	Slc12a6	chr2:112106470-112208184	2.68878
1666	NM_133666	Ndufv1	chr19:4007504-4012725	2.20632
1667	NM_133667	Pdk2	chr11:94887571-94902685	4.14587
1668	NM_133673	Tor1b	chr2:30808520-30814535	2.47721
1669	NM_133687	Cxxc5	chr18:35989471-36021342	2.15586
1670	NM_133691	Puf60	chr15:75900611-75911376	5.80539
1671	NM_133701	Prpf6	chr2:181336023-181390366	2.04523
1672	NM_133706	Tmem97	chr11:78355318-78364237	4.24621
1673	NM_133708	Gmppa	chr1:75432517-75439751	2.26249
1674	NM_133711	Spata4	chr8:55686133-55695451	2.11758
1675	NM_133727	Kptn	chr7:16705224-16712865	2.01514
1676	NM_133728	Asnsd1	chr1:53401487-53409543	4.59754
1677	NM_133734	Dcaf11	chr14:56178865-56188902	2.12317
1678	NM_133735	Ptcd1	chr5:145901265-145927973	3.44283
1679	NM_133755	Tubgcp2	chr7:147181853-147222249	3.23613
1680	NM_133758	Usp47	chr7:119167019-119254900	2.18539
1681	NM_133759	Zbtb3	chr19:8876985-8879344	2.27697
1682	NM_133764	Atp6v0e2	chr6:48487567-48491799	2.22981
1683	NM_133775	Il33	chr19:29999603-30035205	2.01664
1684	NM_133791	Wwc2	chr8:48912963-49075905	2.72525
1685	NM_133797	4833439L19Rik	chr13:54605165-54666743	2.98418
1686	NM_133803	Dpp3	chr19:4907228-4928287	3.23293
1687	NM_133807	Lrrc59	chr11:94491137-94515068	2.34122
1688	NM_133808	Hdlbp	chr1:95302516-95375385	5.61563
1689	NM_133817	Zfp451	chr1:33818597-33871272	2.80437
1690	NM_133821	Phlpp1	chr1:108068445-108290822	3.19536
1691	NM_133833	Dst	chr1:34068669-34365497	4.00392
1692	NM_133847	Tm9sf4	chr2:152987036-153036199	3.38182
1693	NM_133851	Nusap1	chr2:119435267-119475896	2.44432
1694	NM_133853	Magi3	chr3:103817187-104024329	2.64786
1695	NM_133857	Usp53	chr3:122636518-122687365	3.00135
1696	NM_133865	Dclre1b	chr3:103604527-103613310	3.09132
1697	NM_133880	Pafah2	chr4:133952274-133983327	2.45274
1698	NM_133886	AU040320	chr4:126430798-126645167	3.84153
1699	NM_133897	Lrrc8c	chr5:105948489-106037973	3.77409
1700	NM_133907	Ube3c	chr5:29895781-30002617	3.34119
1701	NM_133916	Eif3b	chr5:140895258-140919312	2.90361
1702	NM_133917	Mlxip	chr5:123844827-123907940	2.88211
1703	NM_133922	Krba1	chr6:48345584-48369854	3.99291
1704	NM_133933	Rpn1	chr6:88034466-88055298	2.02791
1705	NM_133941	Dhx32	chr7:140901015-140968486	2.14721
1706	NM_133945	Vrk3	chr7:52003998-52032884	2.1704
1707	NM_133952	Unc45a	chr7:87470178-87485105	3.1159
1708	NM_133973	Cog4	chr8:113370923-113406134	4.31785
1709	NM_133975	Trip12	chr1:84717763-84835879	4.55944
1710	NM_133979	Ano10	chr9:122084996-122203492	3.76957
1711	NM_133981	Alg9	chr9:50583329-50651744	3.33521
1712	NM_133981	Alg9	chr9:50583329-50651744	3.33521
1713	NM_134009	Ncln	chr10:80949203-80959108	3.64449
1714	NM_134013	Psme4	chr11:30671774-30780361	4.18278
1715	NM_134024	Tubg1	chr11:100981444-100987733	2.19109
1716	NM_134025	Pex12	chr11:83105200-83112479	2.66718
1717	NM_134027	Med1	chr11:98013468-98054607	4.1442
1718	NM_134040	Ddx1	chr12:13226112-13255980	2.11821
1719	NM_134076	Abhd4	chr14:54873803-54888844	2.65681
1720	NM_134091	Sgsm3	chr15:80808194-81021187	2.58924
1721	NM_134093	Letmd1	chr15:100299464-100309683	2.28562
1722	NM_134101	Psmd2	chr16:20651724-20663487	3.49997
1723	NM_134126	Ift140	chr17:25153030-25236442	4.95509
1724	NM_134134	Hmgxb3	chr18:61290930-61336704	3.37172
1725	NM_134136	Fbxo38	chr18:62663712-62708397	2.30621
1726	NM_134152	Lpxn	chr19:12873098-12908298	2.42146
1727	NM_134155	Brms1	chr19:5041403-5049917	2.17019
1728	NM_134189	Galnt10	chr11:57458943-57601002	3.21058
1729	NM_134189	Galnt10	chr11:57458943-57601002	3.21058
1730	NM_134257	Rgs3	chr4:62220880-62364053	4.58294
1731	NM_134471	Kif2c	chr4:116832240-116855229	3.12316
1732	NM_138585	Cherp	chr8:74967778-74999132	3.6279
1733	NM_138592	Usp39	chr6:72268669-72295169	2.13078
1734	NM_138646	Hps4	chr5:112772114-112807444	3.66462
1735	NM_138659	Prpf8	chr11:75300278-75322949	2.18393
1736	NM_138673	Stab2	chr10:86303954-86470687	4.47042
1737	NM_138747	Nop2	chr6:125081900-125094771	2.30961
1738	NM_139059	Csnk1d	chr11:120823054-120852647	2.07109
1739	NM_139117	Csda	chr6:131314875-131338468	2.48833
1740	NM_139143	Slc39a6	chr18:24738381-24762318	2.27809
1741	NM_139150	Carf	chr1:60133711-60207878	2.46981
1742	NM_139153	Agap3	chr5:23957994-24007865	2.26454
1743	NM_139292	Reep6	chr10:79792889-79799186	3.68586
1744	NM_139294	Braf	chr6:39553236-39675462	2.34496
1745	NM_139301	Catsper1	chr19:5335740-5344153	3.9704
1746	NM_139304	Gatad2b	chr3:90145575-90162042	2.14817
1747	NM_144512	Slc6a13	chr6:121250313-121287736	2.06822
1748	NM_144512	Slc6a13	chr6:121250313-121287736	2.06822
1749	NM_144518	2900011O08Rik	chr16:13986729-14101587	2.15096
1750	NM_144519	Zfp639	chr3:32409471-32419755	5.51894
1751	NM_144525	Tmem214	chr5:31172019-31179840	3.56653
1752	NM_144533	Nmnat3	chr9:98197001-98311847	2.39061
1753	NM_144536	Cdkal1	chr13:29417174-29947457	4.06123
1754	NM_144538	Rab3il1	chr19:10092717-10110076	3.77201
1755	NM_144539	Slamf7	chr1:173562533-173583168	2.67971
1756	NM_144541	Bre	chr5:32000422-32387112	2.75218
1757	NM_144553	Dlgap5	chr14:48007453-48038082	2.27194
1758	NM_144792	Sgms1	chr19:32197216-32462944	3.01491
1759	NM_144817	Camk1g	chr1:195172539-195196476	3.75817
1760	NM_144819	Ccdc92	chr5:125314801-125342591	2.13863
1761	NM_144827	Spata20	chr11:94340217-94346624	4.25272
1762	NM_144830	Tmem106a	chr11:101443555-101453099	2.09725
1763	NM_144831	Dhx8	chr11:101594269-101628671	2.57505
1764	NM_144835	Heatr1	chr13:12487641-12531160	2.98804
1765	NM_144843	Mtmr6	chr14:60884041-60921208	2.57382
1766	NM_144849	Ankrd54	chr15:78883523-78893289	2.75468
1767	NM_144851	Senp1	chr15:97869174-97962878	3.04547
1768	NM_144856	Slc22a7	chr17:46569133-46575426	6.00344
1769	NM_144860	Mib1	chr18:10725622-10812215	2.75045
1770	NM_144860	Mib1	chr18:10725622-10812215	2.75045
1771	NM_144865	Reep2	chr18:35000242-35007117	2.43082
1772	NM_144868	Pcnxl3	chr19:5664634-5688908	3.86601
1773	NM_144887	Zdhhc5	chr2:84518558-84555321	4.96947
1774	NM_144893	Slc35c2	chr2:165102021-165113338	6.71204
1775	NM_144898	Msto1	chr3:88639152-88717872	2.51723
1776	NM_145070	Hip1r	chr5:124423636-124453224	4.02365
1777	NM_145076	Trim24	chr6:37820810-37916289	2.2883
1778	NM_145130	Lpcat3	chr6:124613121-124662196	3.63482
1779	NM_145138	Nek9	chr12:86640463-86680312	3.06743
1780	NM_145139	Eif3l	chr15:78905652-78924830	3.35334
1781	NM_145145	Pomt1	chr2:32092202-32115625	3.94605
1782	NM_145148	Frmd4b	chr6:97236860-97567651	2.64825
1783	NM_145150	Prc1	chr7:87439350-87461145	2.38303
1784	NM_145223	Alms1	chr6:85537524-85652745	4.02527
1785	NM_145354	Nsun2	chr13:69750894-69774657	3.47898
1786	NM_145371	Eif2b1	chr5:125020222-125029066	2.42343
1787	NM_145378	Pla2g4b	chr2:119859168-119868768	2.43975
1788	NM_145384	Pqlc2	chr4:138853919-138866615	2.31018
1789	NM_145390	Tnpo2	chr8:87560813-87581481	3.09287
1790	NM_145394	Slc44a3	chr3:121162445-121235262	3.22949
1791	NM_145396	Tbl3	chr17:24837597-24844598	2.21717
1792	NM_145400	Ube4a	chr9:44731209-44773683	2.28028
1793	NM_145401	Prkag2	chr5:24368552-24606460	4.71873
1794	NM_145404	Prmt7	chr8:108734953-108775594	2.20941
1795	NM_145406	Slc10a3	chrX:71614557-71618688	2.89153
1796	NM_145409	Chtf18	chr17:25854116-25864360	2.61105
1797	NM_145413	Fam20b	chr1:158608701-158649041	2.28357
1798	NM_145425	Wdpcp	chr11:21472283-21798689	2.61378
1799	NM_145432	Heatr6	chr11:83567138-83597256	2.37817
1800	NM_145436	Cdc27	chr11:104363842-104411934	2.45936
1801	NM_145447	Mfsd7c	chr12:87087488-87154535	2.22545
1802	NM_145458	Pxk	chr14:8930726-8997625	3.21973
1803	NM_145476	Tbc1d22a	chr15:86044888-86328933	2.09206
1804	NM_145477	Alg12	chr15:88635672-88649748	2.68008
1805	NM_145488	Pex6	chr17:46848411-46862490	2.1411
1806	NM_145496	Dak	chr19:10666686-10678748	3.04338
1807	NM_145505	Fam160b1	chr19:57435498-57464084	2.68891
1808	NM_145508	Dyrk3	chr1:133025017-133034811	2.814
1809	NM_145520	Trub2	chr2:29631630-29643191	2.03092
1810	NM_145531	Spg11	chr2:121854318-121944122	3.55993
1811	NM_145537	Edem2	chr2:155527408-155555211	2.45932
1812	NM_145542	Ahcyl1	chr3:107466037-107499466	2.35006
1813	NM_145574	Ccdc136	chr6:29348925-29376995	3.44001
1814	NM_145588	Kif22	chr7:134171244-134185934	2.31552
1815	NM_145589	Prr14	chr7:134615127-134620272	2.57654
1816	NM_145606	Chmp1a	chr8:125728160-125736688	2.23804
1817	NM_145612	Zfp810	chr9:22081191-22112082	2.47606
1818	NM_145617	Herc1	chr9:66198256-66362400	3.57288
1819	NM_145619	Parp3	chr9:106372683-106378982	2.64761
1820	NM_145621	Camkv	chr9:107838250-107852022	3.25637
1821	NM_145633	Ankrd27	chr7:36371265-36424256	3.81963
1822	NM_145746	Odf4	chr11:68735336-68740583	2.67322
1823	NM_145760	Arfgap1	chr2:180701929-180717229	3.23518
1824	NM_145824	Ranbp10	chr8:108292207-108351250	2.3653
1825	NM_145890	Grhl1	chr12:25257151-25302256	2.66365
1826	NM_145940	Wipi1	chr11:109434834-109472703	2.10586
1827	NM_145970	Cc2d1a	chr8:86656726-86671652	3.38961
1828	NM_145972	BC027231	chr16:44724413-44737397	2.52263
1829	NM_145979	Chd4	chr6:125046180-125080519	2.55495
1830	NM_145990	Cdk5rap2	chr4:69884057-70071401	3.84809
1831	NM_145993	L3mbtl2	chr15:81494365-81527717	2.00447
1832	NM_146000	Bud13	chr9:46091094-46106866	2.2853
1833	NM_146001	Hip1	chr5:135882387-136020992	2.32286
1834	NM_146002	Rhbdd2	chr5:136108523-136122246	3.07901
1835	NM_146019	Chd3	chr11:69157852-69182893	3.1175
1836	NM_146032	Srp68	chr11:116106479-116135531	2.90757
1837	NM_146065	Atf7	chr15:102367074-102455852	3.34402
1838	NM_146082	BC027072	chr17:72092894-72102225	4.20781
1839	NM_146105	Cnst	chr1:181476659-181557604	2.99791
1840	NM_146122	Dennd1a	chr2:37631768-38142904	3.45443
1841	NM_146126	Sord	chr2:122060574-122091073	4.53941
1842	NM_146142	Tdrd7	chr4:46000333-46047631	2.19332
1843	NM_146152	Ipo13	chr4:117567097-117587604	2.99233
1844	NM_146155	Ahdc1	chr4:132567420-132634025	3.34092
1845	NM_146155	Ahdc1	chr4:132567420-132634025	3.34092
1846	NM_146170	C87436	chr6:86388391-86420381	3.4733
1847	NM_146171	Ncapd2	chr6:125118024-125141604	2.54099
1848	NM_146186	Wdr62	chr7:31025156-31065440	4.57327
1849	NM_146200	Eif3c	chr7:133690424-133709880	2.684
1850	NM_146216	Vac14	chr8:113142537-113244299	2.56666
1851	NM_146218	Rfwd3	chr8:113794843-113824122	2.21818
1852	NM_146224	Zfp280d	chr9:72122705-72211578	2.27737
1853	NM_146247	Mettl22	chr16:8470905-8490290	2.13667
1854	NM_146247	Mettl22	chr16:8470905-8490290	2.13667
1855	NM_146251	Pnpla7	chr2:24831552-24909592	3.17179
1856	NM_147151	Ehmt2	chr17:35035443-35050992	3.03117
1857	NM_148673	Slu7	chr11:43247232-43261483	2.19051
1858	NM_148932	Pom121	chr5:135845822-135870416	4.43523
1859	NM_148937	Plcd4	chr1:74455957-74634602	3.5074
1860	NM_148958	Osbpl10	chr9:114976396-115141341	2.8701
1861	NM_152234	Ubqln1	chr13:58277516-58317014	2.49174
1862	NM_152801	Arhgef6	chrX:54484661-54591906	2.67939
1863	NM_152818	Osbp2	chr11:3603733-3763906	2.95393
1864	NM_153057	Nomo1	chr7:53289065-53339582	3.997
1865	NM_153082	Dnajc27	chr12:4082573-4110612	3.6514
1866	NM_153092	Nupl2	chr5:23670780-23689826	2.38282
1867	NM_153122	Oplah	chr15:76124863-76137675	3.28635
1868	NM_153125	Sec16a	chr2:26264950-26300736	4.60917
1869	NM_153126	Nat10	chr2:103561415-103601407	2.17723
1870	NM_153129	Pacs1	chr19:5133684-5273119	4.98189
1871	NM_153162	Txnrd3	chr6:89593981-89625523	2.62477
1872	NM_153387	Tubgcp4	chr2:120996941-121097122	3.69719
1873	NM_153391	Wdr19	chr5:65590934-65651654	2.35849
1874	NM_153396	Mical3	chr6:120957257-121031627	2.64574
1875	NM_153397	Adam32	chr8:25946614-26059276	4.36046
1876	NM_153406	Specc1l	chr10:74674817-74775145	3.31387
1877	NM_153414	Ints9	chr14:65568881-65658672	2.82907
1878	NM_153415	Pomt2	chr12:88447815-88505673	2.15488
1879	NM_153417	Trpm6	chr19:18824472-18967001	3.54774
1880	NM_153424	Nphp4	chr4:151852250-151937293	2.92681
1881	NM_153457	Rtn1	chr12:73312738-73509926	4.3087
1882	NM_153489	Ubap2l	chr3:89802681-89856437	2.8168
1883	NM_153505	Nckap1l	chr15:103284255-103329231	2.59917
1884	NM_153516	Bcl2l13	chr6:120786247-120842860	2.84912
1885	NM_153518	Ccdc65	chr15:98538657-98553764	3.86864
1886	NM_153521	Lrrc41	chr4:115748069-115796295	2.74438
1887	NM_153527	Dnajb13	chr7:107651528-107663324	2.216
1888	NM_153530	Dis3l2	chr1:88600378-88946672	7.23479
1889	NM_153544	BC030867	chr11:102110195-102126497	2.6727
1890	NM_153569	Gak	chr5:108998432-109058758	2.71205
1891	NM_153570	Noc4l	chr5:111077437-111082401	2.11084
1892	NM_153679	Cpt1c	chr7:52214741-52230221	4.64593
1893	NM_153774	Ipo9	chr1:137278891-137327068	3.33967
1894	NM_153777	Lrrc56	chr7:148380028-148399979	2.35921
1895	NM_153778	Atoh8	chr6:72156171-72185571	2.57077
1896	NM_153791	Flywch1	chr17:23892389-23908558	3.06994
1897	NM_170599	Igsf11	chr16:38902457-39027270	2.16382
1898	NM_170671	Mycbpap	chr11:94362660-94382816	3.21904
1899	NM_172015	Iars	chr13:49777498-49829636	2.56575
1900	NM_172121	Zc3h3	chr15:75584876-75672338	4.07753
1901	NM_172147	Plb1	chr5:32535080-32666729	3.20636
1902	NM_172150	Ift52	chr2:162843207-162871871	2.80426
1903	NM_172255	Wdr11	chr7:136735376-136779252	3.61372
1904	NM_172257	Sidt2	chr9:45745957-45763332	3.88324
1905	NM_172258	Slc36a3	chr11:54938324-54965208	2.23034
1906	NM_172264	Chdh	chr14:30822185-31340242	2.42763
1907	NM_172266	Lpgat1	chr1:193541902-193608134	2.14017
1908	NM_172268	Nup214	chr2:31829969-31909495	4.15637
1909	NM_172280	2210018M11Rik	chr7:105739115-105805079	3.1813
1910	NM_172281	Rnf40	chr7:134732211-134747119	3.12318
1911	NM_172285	Plcg2	chr8:120022190-120159042	2.13093
1912	NM_172304	Tex10	chr4:48292673-48486294	2.59962
1913	NM_172338	Dnajc16	chr4:141317912-141346559	2.07783
1914	NM_172339	Snapc4	chr2:26218284-26236173	2.84623
1915	NM_172381	AI314180	chr4:58812902-58925597	3.25176
1916	NM_172391	Ahsa2	chr11:23206894-23397946	3.44423
1917	NM_172391	Ahsa2	chr11:23206894-23397946	3.44423
1918	NM_172394	Nup88	chr11:70658264-70783475	2.39643
1919	NM_172397	Limd2	chr11:106017569-106021456	3.17042
1920	NM_172404	Ccbl1	chr2:30040650-30061219	2.17285
1921	NM_172421	Asxl2	chr12:3426856-3506849	2.77541
1922	NM_172422	Fastkd2	chr1:63777198-63799959	2.40471
1923	NM_172424	Med13l	chr5:119010727-119215446	3.24316
1924	NM_172428	Ccdc134	chr15:81958351-81972632	2.56278
1925	NM_172430	Sphkap	chr1:83252355-83404775	3.15917
1926	NM_172438	Thoc5	chr11:4795345-4828868	3.97759
1927	NM_172447	A330021E22Rik	chr5:5580981-5664232	2.78168
1928	NM_172457	Mob3a	chr10:80147997-80164565	3.75564
1929	NM_172461	Nek11	chr9:105064796-105297617	2.09992
1930	NM_172476	Tmc7	chr7:125679357-125728200	3.44924
1931	NM_172485	Thsd7b	chr1:131169880-132115855	2.6559
1932	NM_172496	Cobl	chr11:12136678-12364963	5.00402
1933	NM_172502	Dcaf15	chr8:86620970-86628661	2.69669
1934	NM_172503	Zswim4	chr8:86734840-86760941	2.65002
1935	NM_172515	Zbbx	chr3:74841828-74947645	3.27676
1936	NM_172518	Fbxo42	chr4:140703836-140759977	2.26919
1937	NM_172519	Dis3l	chr9:64154562-64189064	4.05924
1938	NM_172521	BC125332	chr2:112088104-112099448	2.24338
1939	NM_172525	Arhgap29	chr3:121656243-121719071	2.15847
1940	NM_172535	Iqub	chr6:24394864-24465067	2.94925
1941	NM_172538	Vezt	chr10:93430844-93498493	2.39775
1942	NM_172541	Tmem120a	chr5:136211359-136220042	3.2104
1943	NM_172551	Polrmt	chr10:79198869-79209326	2.00014
1944	NM_172571	Fbf1	chr11:116003598-116029492	3.49772
1945	NM_172579	Sipa1l1	chr12:83271002-83552771	3.76359
1946	NM_172583	Tmem63c	chr12:88367513-88430989	3.05102
1947	NM_172584	Itpk1	chr12:103806792-103943079	2.84861
1948	NM_172594	Dhx29	chr13:113718000-113759395	2.21107
1949	NM_172597	Txndc16	chr14:45754122-45839069	2.60763
1950	NM_172610	Mpped1	chr15:83610452-83688904	3.35878
1951	NM_172610	Mpped1	chr15:83610452-83688904	3.35878
1952	NM_172615	1700021K19Rik	chr16:32821787-32868452	3.909
1953	NM_172620	Vps52	chr17:34092826-34103433	2.68131
1954	NM_172624	Dpp9	chr17:56326104-56358312	2.8277
1955	NM_172625	Ino80c	chr18:24263261-24280320	2.49482
1956	NM_172646	Dnm3	chr1:163917432-164408165	3.97503
1957	NM_172646	Dnm3	chr1:163917432-164408165	3.97503
1958	NM_172653	Slc39a10	chr1:46864388-46910354	2.36221
1959	NM_172660	D2Wsu81e	chr2:30027043-30033979	3.56044
1960	NM_172670	Gyltl1b	chr2:92205202-92211193	3.09332
1961	NM_172672	Ganc	chr2:120181044-120330655	3.00961
1962	NM_172676	Samd10	chr2:181329923-181333852	2.53047
1963	NM_172679	4932438A13Rik	chr3:36762027-36951955	4.32782
1964	NM_172681	D930015E06Rik	chr3:83702208-83844083	4.02724
1965	NM_172692	Gba2	chr4:43575505-43600359	3.10752
1966	NM_172701	Oscp1	chr4:125735808-125766578	4.75452
1967	NM_172703	Eif4g3	chr4:137549370-137762994	2.61001
1968	NM_172719	Gcn1l1	chr5:116015271-116072663	5.27077
1969	NM_172722	Naa25	chr5:121847990-121890122	2.33493
1970	NM_172723	Adap1	chr5:139747829-139801418	3.44663
1971	NM_172739	Grlf1	chr7:17079821-17200342	4.63468
1972	NM_172742	Mtmr10	chr7:71432555-71485692	2.58792
1973	NM_172749	Zfp646	chr7:135021214-135034484	5.66497
1974	NM_172751	Arhgef10	chr8:14911716-15001085	3.23777
1975	NM_172755	Sugp2	chr8:72744091-72787004	2.94804
1976	NM_172768	Gramd1b	chr9:40105491-40263349	3.07628
1977	NM_172770	Ttc12	chr9:49245065-49294330	2.80936
1978	NM_172784	Lrp11	chr10:7309597-7345275	2.75443
1979	NM_172799	Ttll6	chr11:95995099-96026766	4.17596
1980	NM_172800	Sdk2	chr11:113642103-113927265	5.61782
1981	NM_172800	Sdk2	chr11:113642103-113927265	5.61782
1982	NM_172808	Antxrl	chr14:34864315-34915940	2.78634
1983	NM_172818	Ttll8	chr15:88744327-88784848	3.53222
1984	NM_172836	9930021J03Rik	chr19:29788891-29880499	2.07577
1985	NM_172864	Wdr63	chr3:145703489-145771000	3.5744
1986	NM_172866	Rgp1	chr4:43575505-43600359	2.63083
1987	NM_172877	Pramef8	chr4:143002328-143010990	3.49553
1988	NM_172878	Ttc34	chr4:154230308-154241236	3.60267
1989	NM_172878	Ttc34	chr4:154230308-154241236	3.60267
1990	NM_172887	Fry	chr5:151062504-151300328	2.95758
1991	NM_172892	Slc13a4	chr6:35217952-35258126	3.33338
1992	NM_172903	Man2a2	chr7:87493982-87516261	3.68704
1993	NM_172912	Abcc12	chr8:89028739-89090489	4.4017
1994	NM_172916	Hydin	chr8:112790876-113134153	4.86321
1995	NM_172916	Hydin	chr8:112790876-113134153	4.86321
1996	NM_172918	Zfp317	chr9:19426534-19454175	2.18083
1997	NM_172924	C230081A13Rik	chr9:56048935-56265857	4.25874
1998	NM_172941	Zkscan17	chr11:59299022-59324569	4.85798
[truncated: 381 more rows]
