# Supplementary material
Source: publisher figshare collection journal article supplement (https://plos.figshare.com/articles/dataset/_/1259769)
Supplement: Supplementary file 1 [file 1 › Table_S6.xls]

## Sheet: Sheet1
Table S6. Fold changes of RANBP9-bound target mRNAs in gcKO testes based on RNA-Seq.
	gene_id	gene_short_name	locus	sample_1	sample_2	status	value_1	value_2	Fold change (KO/WT)	Log2_Fold change_(KO/WT)	test_stat	p_value	q_value	significant
1	XLOC_008059	Zfp458	chr13:67329334-67379465	gcKO	WT	OK	2.27309	3.022	0.752181	-0.410852	0.866779	0.1687	0.377864	no
2	XLOC_008073	Zfp738	chr13:67768377-67784449	gcKO	WT	OK	0.833513	1.24463	0.669687	-0.578439	0.921536	0.1431	0.342872	no
3	XLOC_016084	BC061194	chr2:18620068-18671232	gcKO	WT	OK	62.865	95.0465	0.661413	-0.596377	1.60813	0.00395	0.0259885	yes
4	XLOC_024506	Plekha8	chr6:54545104-54595816	gcKO	WT	OK	9.49078	11.9306	0.795499	-0.330064	0.882201	0.12235	0.310448	no
5	XLOC_004054	Trpv1	chr11:73051760-73074009	gcKO	WT	OK	1.03595	1.73213	0.598079	-0.741591	0.942544	0.12035	0.307329	no
6	XLOC_026191	Zscan22	chr7:13483163-13495125	gcKO	WT	OK	4.02365	5.22743	0.769719	-0.377596	0.803399	0.15285	0.356773	no
7	XLOC_027279	Zscan22	chr7:13483163-13495125	gcKO	WT	NOTEST	0.494659	0.146278	3.38164	1.75772	0	1	1	no
8	XLOC_028982	Whsc1l1	chr8:26712769-26830139	gcKO	WT	OK	8.2602	10.1971	0.810054	-0.30391	0.604815	0.29915	0.523341	no
9	XLOC_015723	Itprip	chr19:47969085-47993789	gcKO	WT	OK	15.6644	19.674	0.796198	-0.328804	0.836474	0.1148	0.298899	no
10	XLOC_017081	Rtel1	chr2:181054428-181091353	gcKO	WT	OK	12.6891	12.2764	1.03362	0.0477092	-0.121425	0.82645	0.91347	no
11	XLOC_011805	Pi4ka	chr16:17280283-17430919	gcKO	WT	OK	23.3826	21.401	1.09259	0.127756	-0.312835	0.5889	0.764228	no
12	XLOC_017917	8430427H17Rik	chr2:153233194-153355707	gcKO	WT	OK	77.5099	82.2231	0.942678	-0.0851632	0.150367	0.788	0.890564	no
13	XLOC_004119	2610507B11Rik	chr11:78075147-78104127	gcKO	WT	OK	70.4803	81.984	0.859684	-0.218123	0.530313	0.34535	0.569433	no
14	XLOC_006173	Hspa2	chr12:77505162-77507923	gcKO	WT	OK	492.255	618.255	0.796201	-0.328795	0.706032	0.21765	0.437494	no
15	XLOC_020404	Ccin	chr4:43996375-43998405	gcKO	WT	OK	93.8976	138.051	0.680166	-0.556037	1.59814	0.0094	0.0505952	no
16	XLOC_026881	Nlrp14	chr7:114248485-114341621	gcKO	WT	OK	88.7125	113.464	0.781856	-0.355025	0.959485	0.1024	0.281124	no
17	XLOC_021029	Penk	chr4:4060675-4065974	gcKO	WT	OK	87.9277	96.7098	0.909191	-0.137345	0.349287	0.53175	0.723281	no
18	XLOC_023015	Ankib1	chr5:3656793-3844662	gcKO	WT	OK	10.0384	10.4658	0.959162	-0.0601444	0.0781245	0.90205	0.951533	no
19	XLOC_002393	BC030307	chr10:86168555-86239588	gcKO	WT	OK	12.8247	19.1027	0.671355	-0.574851	1.49176	0.0085	0.0467528	yes
20	XLOC_018888	Arhgef11	chr3:87422482-87552545	gcKO	WT	OK	9.32958	9.98516	0.934345	-0.0979726	0.0957356	0.86655	0.932996	no
21	XLOC_000973	Atg9a	chr1:75177406-75188497	gcKO	WT	OK	70.1255	73.4686	0.954496	-0.0671867	0.159541	0.7645	0.87662	no
22	XLOC_003073	Rab3ip	chr10:116342839-116387524	gcKO	WT	OK	38.9131	36.7313	1.0594	0.0832459	-0.217925	0.6973	0.836454	no
23	XLOC_002403	Gnptab	chr10:87826888-87910074	gcKO	WT	OK	5.39538	5.31856	1.01444	0.0206892	-0.0511055	0.9303	0.965611	no
24	XLOC_012668	Scube3	chr17:28279470-28309248	gcKO	WT	OK	8.97977	4.80772	1.86778	0.901326	-1.69406	0.0093	0.0501429	no
25	XLOC_016164	Ppp1r26	chr2:28302887-28311183	gcKO	WT	OK	4.91285	3.99548	1.2296	0.298191	-0.722105	0.2036	0.419663	no
26	XLOC_003664	Zmiz2	chr11:6289366-6306310	gcKO	WT	OK	15.029	10.5573	1.42356	0.509518	-1.28429	0.02375	0.0990701	no
27	XLOC_021144	Spag8	chr4:43664124-43666658	gcKO	WT	OK	38.576	45.0521	0.856253	-0.223892	0.537721	0.3229	0.547894	no
28	XLOC_008068	Zfp58	chr13:67591102-67601458	gcKO	WT	OK	3.272	5.91874	0.55282	-0.855119	1.83972	0.0046	0.0291724	yes
29	XLOC_033281	Fndc3c1	chrX:103615381-103680568	gcKO	WT	NOTEST	0.506943	0.615829	0.823188	-0.280708	0	1	1	no
30	XLOC_021776	Plekhn1	chr4:155590035-155602821	gcKO	WT	OK	8.57801	9.7636	0.87857	-0.186769	0.390366	0.477	0.683294	no
31	XLOC_012797	Cdsn	chr17:35689072-35694125	gcKO	WT	OK	1.11588	1.04998	1.06276	0.0878201	-0.100565	0.8615	0.93039	no
32	XLOC_006666	Zfyve26	chr12:80333333-80397269	gcKO	WT	OK	4.65176	3.84064	1.21119	0.276428	-0.692488	0.21065	0.428499	no
33	XLOC_013574	Tmem232	chr17:65605261-65890122	gcKO	WT	OK	32.7794	45.3532	0.722758	-0.468417	1.25431	0.02545	0.104461	no
34	XLOC_006449	Adam6b	chr12:114727775-114730046	gcKO	WT	OK	14.9084	26.0388	0.572546	-0.804534	2.38548	1e-04	0.00104973	yes
35	XLOC_012803	Mdc1	chr17:35978392-35996616	gcKO	WT	OK	30.545	29.656	1.02998	0.0426106	-0.108684	0.8416	0.921216	no
36	XLOC_003883	Olfr316	chr11:58571168-58572089	gcKO	WT	NOTEST	0.294528	0.368153	0.800015	-0.3219	0	1	1	no
37	XLOC_029930	Acd	chr8:108214805-108232068	gcKO	WT	OK	13.4168	13.1075	1.0236	0.0336476	-0.037931	0.9507	0.974838	no
38	XLOC_019662	Ttf2	chr3:100742782-100773586	gcKO	WT	OK	2.898	3.19072	0.908259	-0.138828	0.301766	0.5854	0.761851	no
39	XLOC_027714	E2f8	chr7:56121798-56136888	gcKO	WT	OK	3.52741	2.3369	1.50944	0.594015	-1.2203	0.0391	0.143953	no
40	XLOC_001290	Lrrc52	chr1:169375775-169396911	gcKO	WT	OK	13.8328	21.8035	0.63443	-0.656467	1.10587	0.0427	0.153166	no
41	XLOC_003997	Neurl4	chr11:69710599-69727385	gcKO	WT	OK	19.3774	18.9626	1.02187	0.0312153	-0.0461253	0.9342	0.967289	no
42	XLOC_000791	Gm597	chr1:28832813-28893305	gcKO	WT	OK	48.4663	36.468	1.32901	0.410348	-0.12448	0.7288	0.855726	no
43	XLOC_009061	Pcdh17	chr14:84843369-84936867	gcKO	WT	OK	2.08559	1.75966	1.18522	0.245156	-0.555421	0.35	0.573666	no
44	XLOC_013467	Capn11	chr17:45767055-45796258	gcKO	WT	OK	20.8406	26.3279	0.791579	-0.337193	0.876191	0.1154	0.299777	no
45	XLOC_003092	Dyrk2	chr10:118296054-118326336	gcKO	WT	OK	13.2756	18.8599	0.703906	-0.506541	1.27036	0.02555	0.104718	no
46	XLOC_000240	Ttll4	chr1:74708159-74748457	gcKO	WT	OK	27.5442	28.1448	0.97866	-0.0311195	0.0754697	0.8876	0.9441	no
47	XLOC_010397	Espl1	chr15:102126719-102154789	gcKO	WT	OK	19.5204	19.1877	1.01734	0.024799	-0.0630197	0.9045	0.952784	no
48	XLOC_014304	Wdr7	chr18:63868306-64149416	gcKO	WT	OK	11.1282	12.7254	0.874487	-0.193489	0.520587	0.34905	0.572632	no
49	XLOC_031111	Vprbp	chr9:106716413-106789385	gcKO	WT	OK	23.2927	29.143	0.799255	-0.32327	0.786606	0.17995	0.392391	no
50	XLOC_007652	Taf9	chr13:101421297-101436368	gcKO	WT	OK	364.533	529.004	0.689093	-0.537228	1.39422	0.01795	0.0807493	no
51	XLOC_002180	Tbata	chr10:60634665-60651590	gcKO	WT	OK	92.172	106.478	0.865644	-0.208148	0.512745	0.34405	0.56855	no
52	XLOC_002180	Tbata	chr10:60634665-60651590	gcKO	WT	OK	92.172	106.478	0.865644	-0.208148	0.512745	0.34405	0.56855	no
53	XLOC_027277	Zscan18	chr7:13353440-13361007	gcKO	WT	OK	2.00563	2.56984	0.780449	-0.357623	0.690305	0.2287	0.449131	no
54	XLOC_026772	C2cd3	chr7:107475246-107618668	gcKO	WT	OK	10.2531	9.08794	1.12821	0.17404	-0.273474	0.61275	0.781358	no
55	XLOC_017731	Pla2g4d	chr2:120091604-120114805	gcKO	WT	OK	2.52614	3.35195	0.753633	-0.408068	0.791022	0.14125	0.340061	no
56	XLOC_008702	Fam149b	chr14:21139080-21202714	gcKO	WT	OK	13.7848	16.2125	0.850258	-0.234036	0.327624	0.56125	0.744422	no
57	XLOC_009233	Ankrd28	chr14:32513125-32643601	gcKO	WT	OK	14.1351	17.7724	0.79534	-0.330359	0.927239	0.12945	0.321736	no
58	XLOC_029203	Inpp4b	chr8:84191110-84646827	gcKO	WT	OK	6.6761	7.29306	0.915405	-0.127519	0.193714	0.77925	0.885375	no
59	XLOC_033403	Cdkl5	chrX:157205944-157432613	gcKO	WT	OK	6.98784	6.17976	1.13076	0.177294	-0.381235	0.53415	0.725367	no
60	XLOC_022481	N4bp2	chr5:66154736-66221295	gcKO	WT	OK	15.0235	12.2971	1.22171	0.288905	-0.356221	0.51255	0.708561	no
61	XLOC_002380	Rfx4	chr10:84218792-84369283	gcKO	WT	OK	25.3929	33.6177	0.755343	-0.404792	1.00886	0.07695	0.233368	no
62	XLOC_005033	Trp53i13	chr11:77306907-77326775	gcKO	WT	OK	11.5354	11.5819	0.995985	-0.00580445	0.00213312	0.9977	0.998495	no
63	XLOC_029750	Ddx49	chr8:72806897-72836896	gcKO	WT	OK	38.0387	56.9086	0.668417	-0.581178	1.337	0.03735	0.138874	no
64	XLOC_026143	Zfp667	chr7:6238181-6259485	gcKO	WT	OK	2.31618	3.703	0.625487	-0.676944	1.40175	0.0159	0.0745581	no
65	XLOC_000541	Rc3h1	chr1:162836541-162905107	gcKO	WT	OK	7.58895	8.60895	0.881519	-0.181938	0.512666	0.3811	0.602279	no
66	XLOC_009132	Gm5797	chr14:8156501-8164909	gcKO	WT	OK	27.7924	46.5287	0.597317	-0.743431	2.40345	0.00135	0.0108138	yes
67	XLOC_016525	Trp53i11	chr2:93027740-93041914	gcKO	WT	OK	14.0318	8.7953	1.59537	0.673899	-1.5128	0.00405	0.0265076	yes
68	XLOC_013572	Pja2	chr17:64630354-64681223	gcKO	WT	OK	18.1289	23.3497	0.776408	-0.365109	1.04416	0.08415	0.247147	no
69	XLOC_021696	Miip	chr4:147234886-147279003	gcKO	WT	OK	31.9705	39.6018	0.807299	-0.308825	0.320849	0.61355	0.781981	no
70	XLOC_015301	Sufu	chr19:46470934-46561307	gcKO	WT	OK	24.243	29.4485	0.823234	-0.280622	0.754379	0.1892	0.404761	no
71	XLOC_011733	Crebbp	chr16:4083955-4213545	gcKO	WT	OK	9.1298	6.06072	1.50639	0.591094	-1.61707	0.00595	0.0356036	yes
72	XLOC_028112	Sox6	chr7:122614386-123182377	gcKO	WT	OK	11.4612	12.0491	0.951208	-0.0721636	0.194693	0.7335	0.859039	no
73	XLOC_012143	Kcnj6	chr16:94970289-95219303	gcKO	WT	OK	5.29828	4.90579	1.08001	0.111039	-0.208478	0.71155	0.844873	no
74	XLOC_029477	Urb2	chr8:126545279-126572471	gcKO	WT	OK	17.0438	17.9899	0.947409	-0.0779363	0.202568	0.7082	0.843206	no
75	XLOC_011583	Gm608	chr16:44173509-44227578	gcKO	WT	OK	1.91313	1.44336	1.32547	0.406507	-0.976596	0.0798	0.23901	no
76	XLOC_004016	Zmynd15	chr11:70267735-70279710	gcKO	WT	OK	44.6302	57.1395	0.781074	-0.35647	0.888003	0.0946	0.267186	no
77	XLOC_005104	Usp32	chr11:84797932-84970751	gcKO	WT	OK	26.7269	38.3145	0.697566	-0.5196	1.42985	0.0141	0.0681007	no
78	XLOC_003928	Specc1	chr11:61842755-62036515	gcKO	WT	OK	8.46225	10.3287	0.819295	-0.287552	0.604786	0.2914	0.515237	no
79	XLOC_016122	Man1b1	chr2:25182969-25207740	gcKO	WT	OK	21.6022	28.4536	0.759208	-0.397431	1.04914	0.0647	0.206645	no
80	XLOC_013196	Abca17	chr17:24400994-24488021	gcKO	WT	OK	12.5464	11.502	1.0908	0.125386	-0.337094	0.5552	0.740412	no
81	XLOC_028120	Smg1	chr7:125274820-125387164	gcKO	WT	OK	18.3299	20.8071	0.880944	-0.182874	0.49919	0.3939	0.612869	no
82	XLOC_010523	Sybu	chr15:44503402-44637375	gcKO	WT	OK	1.17681	0.972626	1.20993	0.274924	-0.270615	0.627	0.79004	no
83	XLOC_028210	Gm166	chr7:134716861-134747959	gcKO	WT	OK	129.008	153.814	0.838727	-0.253719	0.375758	0.5266	0.720234	no
84	XLOC_015406	Bbs1	chr19:4886863-4906651	gcKO	WT	OK	5.39022	6.47701	0.832208	-0.264986	0.673799	0.23325	0.452591	no
85	XLOC_021655	Plekhm2	chr4:141181631-141220030	gcKO	WT	OK	19.158	23.6259	0.81089	-0.302427	0.780598	0.1565	0.361464	no
86	XLOC_015752	Rab11fip2	chr19:59947451-60020717	gcKO	WT	OK	28.0365	28.205	0.994026	-0.00864504	0.0190974	0.9764	0.987207	no
87	XLOC_028146	Usp31	chr7:128785534-128850767	gcKO	WT	OK	3.42399	2.76382	1.23886	0.309013	-0.781457	0.1714	0.381496	no
88	XLOC_030905	Cln6	chr9:62686593-62723724	gcKO	WT	OK	9.17929	6.08825	1.50771	0.592355	-1.21079	0.05125	0.174942	no
89	XLOC_026562	1700039E15Rik	chr7:52532704-52544538	gcKO	WT	OK	84.4533	88.3379	0.956026	-0.0648795	0.149772	0.78285	0.887458	no
90	XLOC_023331	Naa11	chr5:97811227-97821349	gcKO	WT	OK	5.60002	7.91599	0.707431	-0.499337	1.26728	0.03195	0.123608	no
91	XLOC_018024	Znfx1	chr2:166861296-166891362	gcKO	WT	OK	15.1706	15.647	0.969553	-0.0446098	0.0635088	0.9107	0.956827	no
92	XLOC_020422	Ncbp1	chr4:46151382-46185274	gcKO	WT	OK	76.4838	103.595	0.738296	-0.437729	1.18629	0.0436	0.155418	no
93	XLOC_022699	Usp30	chr5:114550341-114573508	gcKO	WT	OK	10.7145	10.6034	1.01048	0.0150296	-0.0356931	0.9456	0.973144	no
94	XLOC_027100	Pwwp2b	chr7:146434380-146453152	gcKO	WT	OK	115.472	163.889	0.704574	-0.505176	1.22559	0.0231	0.0972632	no
95	XLOC_008239	Itga1	chr13:115748288-115892172	gcKO	WT	OK	5.48956	7.69398	0.713488	-0.487041	1.17335	0.0541	0.181805	no
96	XLOC_026586	Ccdc114	chr7:53173340-53204326	gcKO	WT	OK	12.1125	13.199	0.917683	-0.123924	0.218675	0.67835	0.824391	no
97	XLOC_024733	Fancd2	chr6:113481675-113546397	gcKO	WT	OK	7.47251	8.47359	0.881859	-0.18138	0.443514	0.41355	0.629103	no
98	XLOC_033286	Gm732	chrX:105141069-105143795	gcKO	WT	OK	6.81054	9.95396	0.684204	-0.547501	1.19166	0.0368	0.137378	no
99	XLOC_005452	Qrich2	chr11:116302344-116327568	gcKO	WT	OK	129.26	185.081	0.698397	-0.517875	0.952865	0.0785	0.2363	no
100	XLOC_010861	Mll2	chr15:98662099-98701745	gcKO	WT	OK	4.93543	2.3685	2.08378	1.0592	-2.64223	5e-05	0.000597811	yes
101	XLOC_000663	Cdc42bpa	chr1:181890988-182126151	gcKO	WT	OK	6.00144	5.92099	1.01359	0.0194698	-0.0417311	0.94155	0.970925	no
102	XLOC_001019	Usp40	chr1:89749840-89905126	gcKO	WT	OK	4.32723	5.75724	0.751615	-0.411936	0.268188	0.6151	0.782662	no
103	XLOC_016794	Plk1s1	chr2:146681624-146795825	gcKO	WT	OK	76.173	114.788	0.663597	-0.591625	1.86531	0.00515	0.0317234	yes
104	XLOC_019726	5330417C22Rik	chr3:108258609-108339953	gcKO	WT	OK	60.4705	72.5267	0.833769	-0.26228	0.637991	0.2548	0.476127	no
105	XLOC_029985	Tmem231	chr8:114435909-114457691	gcKO	WT	OK	8.52771	9.04087	0.94324	-0.0843033	0.199483	0.72205	0.851584	no
106	XLOC_011423	Rimbp3	chr16:17208227-17214920	gcKO	WT	OK	94.2748	133.707	0.705085	-0.50413	1.21129	0.0347	0.131691	no
107	XLOC_017864	Ralgapa2	chr2:146067034-146337745	gcKO	WT	OK	7.92942	7.30563	1.08538	0.118206	-0.300455	0.59745	0.769875	no
108	XLOC_024767	Dcp1b	chr6:118542313-119171632	gcKO	WT	OK	30.054	32.5061	0.924565	-0.113152	0.266649	0.6317	0.792725	no
109	XLOC_012580	Zscan10	chr17:23737822-23747986	gcKO	WT	OK	1.58258	1.51148	1.04704	0.0663119	-0.0897746	0.8727	0.936754	no
110	XLOC_005342	Gm884	chr11:103318595-103482792	gcKO	WT	OK	22.2159	23.4137	0.948842	-0.0757606	0.157398	0.78415	0.888251	no
111	XLOC_006060	Atxn7l1	chr12:33832550-33936022	gcKO	WT	NOTEST	1.09143	0.998259	1.09333	0.128737	0	1	1	no
112	XLOC_006061	Atxn7l1	chr12:33987379-34055923	gcKO	WT	OK	16.2691	14.8845	1.09302	0.128326	-0.305807	0.57275	0.7531	no
113	XLOC_006961	Atxn7l1	chr12:33987379-34055923	gcKO	WT	NOTEST	1.32626	1.2462	1.06424	0.0898231	0	1	1	no
114	XLOC_022790	Lrrc43	chr5:123939239-123958216	gcKO	WT	OK	38.6654	66.2913	0.583265	-0.777777	2.05074	5e-05	0.000597811	yes
115	XLOC_032738	Cpxcr1	chrX:113562552-113592392	gcKO	WT	OK	10.8753	13.3278	0.815986	-0.293375	0.833215	0.24875	0.469255	no
116	XLOC_003059	Atxn7l3b	chr10:112362483-112366082	gcKO	WT	OK	77.1178	75.6952	1.01879	0.0268621	-0.0711202	0.90515	0.953069	no
117	XLOC_014130	AW554918	chr18:25327496-25625965	gcKO	WT	OK	12.8696	17.2009	0.748193	-0.418515	1.11333	0.04855	0.168171	no
118	XLOC_030960	Rfx7	chr9:72380046-72470756	gcKO	WT	OK	5.73542	4.1684	1.37593	0.460406	-0.791605	0.1754	0.386326	no
119	XLOC_022632	Lrrc8b	chr5:105844793-105919095	gcKO	WT	OK	190.037	244.661	0.776736	-0.364506	0.730975	0.17265	0.383177	no
120	XLOC_009227	Dnahc1	chr14:32073560-32137082	gcKO	WT	OK	18.9577	22.6129	0.838358	-0.254361	0.678457	0.2417	0.461992	no
121	XLOC_003939	Fbxw10	chr11:62660544-62690971	gcKO	WT	OK	54.2942	67.127	0.808828	-0.306096	0.807194	0.1527	0.356688	no
122	XLOC_009257	4930596D02Rik	chr14:36622671-36625164	gcKO	WT	OK	21.2605	17.4816	1.21616	0.282341	-0.756562	0.24245	0.462968	no
123	XLOC_004474	4933422H20Rik	chr11:115300154-115309588	gcKO	WT	OK	98.9804	123.893	0.798918	-0.323883	0.851456	0.14445	0.345086	no
124	XLOC_016169	Ak8	chr2:28555680-28668685	gcKO	WT	OK	107.725	147.644	0.729627	-0.454767	1.39293	0.03495	0.13236	no
125	XLOC_026642	Adamts17	chr7:73984620-74297511	gcKO	WT	OK	4.68201	3.25768	1.43722	0.523285	-1.01494	0.0771	0.233681	no
126	XLOC_030825	Ppp2r1b	chr9:50665039-50817181	gcKO	WT	OK	33.1117	37.6684	0.879031	-0.186015	0.431424	0.4636	0.672886	no
127	XLOC_002112	Armc2	chr10:41634744-41738783	gcKO	WT	OK	13.4741	19.7405	0.682561	-0.550962	0.393438	0.4856	0.688546	no
128	XLOC_002734	Armc2	chr10:41634744-41738783	gcKO	WT	OK	10.6845	18.6192	0.573843	-0.801273	1.56822	0.0064	0.0377301	yes
129	XLOC_004461	Dnaic2	chr11:114588725-114619200	gcKO	WT	OK	55.5361	93.3614	0.594851	-0.749402	1.8906	0.0141	0.0681008	no
130	XLOC_026494	Zfp936	chr7:50432957-50447479	gcKO	WT	OK	0.987796	1.35659	0.728146	-0.457701	0.625738	0.33925	0.564293	no
131	XLOC_008070	Zfp748	chr13:67639589-67654088	gcKO	WT	OK	9.29163	9.12271	1.01852	0.0264693	-0.0245872	0.95755	0.97795	no
132	XLOC_004168	Ap2b1	chr11:83105200-83218542	gcKO	WT	OK	81.1351	107.377	0.75561	-0.404291	0.93752	0.09625	0.270296	no
133	XLOC_031894	Slc22a14	chr9:119078567-119099511	gcKO	WT	OK	98.4093	101.631	0.9683	-0.0464794	0.111286	0.83645	0.918501	no
134	XLOC_004549	Baiap2	chr11:119794349-119868098	gcKO	WT	OK	59.2119	75.4434	0.784852	-0.349508	0.726684	0.19365	0.410332	no
135	XLOC_017232	Zdhhc12	chr2:29934285-29949155	gcKO	WT	OK	28.1908	21.5852	1.30602	0.385183	-0.780081	0.1698	0.379414	no
136	XLOC_026675	Wdr93	chr7:86880812-86930839	gcKO	WT	OK	25.3471	39.74	0.637823	-0.648771	1.50082	0.0093	0.0501429	no
137	XLOC_005288	Kat2a	chr11:100565869-100573781	gcKO	WT	OK	12.6511	12.7368	0.993271	-0.00974571	0.0233022	0.96735	0.982906	no
138	XLOC_003692	Sertad2	chr11:20443255-20553136	gcKO	WT	OK	9.38426	12.0661	0.777738	-0.362647	0.987577	0.0911	0.260404	no
139	XLOC_023691	Smurf1	chr5:145637363-145726728	gcKO	WT	OK	12.735	11.6431	1.09378	0.129331	-0.336842	0.547	0.735029	no
140	XLOC_027790	Slco3a1	chr7:81420303-81699666	gcKO	WT	OK	14.5502	11.7545	1.23784	0.30783	-0.751764	0.17865	0.39088	no
141	XLOC_025229	Kdm3a	chr6:71538965-71583821	gcKO	WT	OK	40.7216	50.906	0.799937	-0.322043	0.892497	0.1287	0.320601	no
142	XLOC_006738	Sel1l	chr12:93044482-93087597	gcKO	WT	OK	10.5141	10.8195	0.971773	-0.0413062	0.109756	0.84715	0.92399	no
143	XLOC_013551	Acsbg2	chr17:56982522-57013870	gcKO	WT	OK	57.7752	92.9249	0.621741	-0.685615	1.8267	0.00115	0.00945597	yes
144	XLOC_000334	Asb1	chr1:93436873-93456389	gcKO	WT	OK	15.5278	22.9179	0.67754	-0.561625	1.46096	0.0083	0.0459242	yes
145	XLOC_009177	Camk2g	chr14:21554096-21613310	gcKO	WT	OK	10.4868	10.0466	1.04382	0.0618625	-0.141801	0.8088	0.9029	no
146	XLOC_031721	Morf4l1	chr9:89986506-90009658	gcKO	WT	OK	165.332	268.05	0.616795	-0.697135	1.82043	0.0023	0.0167128	yes
147	XLOC_023515	Tctn1	chr5:122659745-122714604	gcKO	WT	OK	12.3385	10.9642	1.12534	0.170365	-0.287509	0.6086	0.778136	no
148	XLOC_001225	Cep350	chr1:157692093-157820385	gcKO	WT	OK	19.4909	24.7428	0.78774	-0.344212	0.859102	0.1251	0.314597	no
149	XLOC_023365	Zfp951	chr5:105242186-105289087	gcKO	WT	OK	2.85098	5.83852	0.488305	-1.03414	2.43264	5e-04	0.00457226	yes
150	XLOC_007709	Gm7120	chr13:120276063-120284312	gcKO	WT	OK	135.102	100.215	1.34812	0.430952	-0.944179	0.08545	0.249942	no
151	XLOC_013203	Tsc2	chr17:24686859-24769574	gcKO	WT	OK	10.9842	6.901	1.59168	0.670547	-1.0367	0.05905	0.193495	no
152	XLOC_019541	Trim46	chr3:89038083-89049819	gcKO	WT	OK	2.47962	6.53396	0.379497	-1.39784	2.69588	5e-05	0.000597811	yes
153	XLOC_000475	Kif21b	chr1:138027977-138074591	gcKO	WT	OK	9.01754	8.44166	1.06822	0.0952075	-0.248291	0.66015	0.812293	no
154	XLOC_000967	Ccdc108	chr1:74948642-74982204	gcKO	WT	OK	55.6914	56.6688	0.982752	-0.025099	0.0573621	0.9195	0.961128	no
155	XLOC_027451	Lipe	chr7:26161837-26352213	gcKO	WT	OK	64.0025	80.3997	0.796054	-0.329062	0.827558	0.1679	0.376744	no
156	XLOC_030617	Dnm2	chr9:21229133-21314630	gcKO	WT	OK	53.8658	58.3565	0.923047	-0.115525	0.304487	0.60475	0.775226	no
157	XLOC_011781	Pdxdc1	chr16:13819369-13949450	gcKO	WT	OK	82.7988	115.089	0.719433	-0.475073	1.23778	0.04005	0.146335	no
158	XLOC_029385	Pkd1l3	chr8:112138111-112217212	gcKO	WT	OK	8.41219	8.57616	0.980881	-0.0278508	0.0495148	0.9253	0.963622	no
159	XLOC_026222	Strn4	chr7:17394615-17426280	gcKO	WT	OK	47.9598	49.8253	0.962559	-0.0550542	0.140756	0.7966	0.895569	no
160	XLOC_016853	Asxl1	chr2:153171874-153229743	gcKO	WT	OK	18.9684	23.9588	0.791709	-0.336964	0.897623	0.10985	0.290905	no
161	XLOC_028142	Pdzd9	chr7:127778702-127814199	gcKO	WT	OK	95.5802	100.435	0.951662	-0.0714831	0.142169	0.7999	0.897431	no
162	XLOC_022381	Tacc3	chr5:34000779-34014849	gcKO	WT	OK	12.4633	17.0119	0.732622	-0.448858	0.975002	0.08165	0.242246	no
163	XLOC_006790	Clmn	chr12:106001323-106103338	gcKO	WT	OK	6.02587	7.06185	0.853299	-0.228877	0.602092	0.27215	0.495823	no
164	XLOC_011809	Med15	chr16:17651263-17723023	gcKO	WT	OK	19.373	16.7867	1.15407	0.206733	-0.533455	0.3469	0.570745	no
165	XLOC_014098	Cabyr	chr18:12899863-12913651	gcKO	WT	OK	102.509	130.483	0.785612	-0.348109	0.851778	0.11705	0.302406	no
166	XLOC_032368	Akap4	chrX:6644644-6655732	gcKO	WT	OK	463.736	857.476	0.540815	-0.886795	1.81521	0.0031	0.0215354	yes
167	XLOC_028871	Map2k7	chr8:4238711-4247905	gcKO	WT	OK	34.8678	72.7773	0.479103	-1.06159	2.1956	0.00015	0.00153046	yes
168	XLOC_007595	Arrdc3	chr13:81022682-81035321	gcKO	WT	OK	15.5484	19.5952	0.79348	-0.333732	0.750869	0.20715	0.424057	no
169	XLOC_008119	Arrdc3	chr13:81022682-81035321	gcKO	WT	OK	5.04662	3.28315	1.53713	0.620238	-0.494181	0.42575	0.640141	no
170	XLOC_025447	Phc1	chr6:122267696-122290245	gcKO	WT	OK	39.3505	39.02	1.00847	0.0121676	-0.0290967	0.9569	0.977774	no
171	XLOC_030615	Ilf3	chr9:21172288-21216164	gcKO	WT	OK	56.2278	54.6691	1.02851	0.0405582	-0.114311	0.85185	0.926469	no
172	XLOC_029300	Ccdc135	chr8:97579002-97602041	gcKO	WT	OK	24.0452	40.1591	0.598748	-0.739979	2.11134	3e-04	0.00288736	yes
173	XLOC_022898	Zscan21	chr5:138558132-138575487	gcKO	WT	OK	44.0788	67.2117	0.65582	-0.608627	1.66597	0.00345	0.023303	yes
174	XLOC_010151	Zfp41	chr15:75447062-75457065	gcKO	WT	OK	16.1967	18.5415	0.873538	-0.195056	0.484458	0.3707	0.592856	no
175	XLOC_028261	Mapk1ip1	chr7:146027500-146037950	gcKO	WT	OK	4.06876	6.03829	0.673827	-0.569553	0.957558	0.08145	0.241933	no
176	XLOC_026317	Zfp180	chr7:24866962-24892711	gcKO	WT	OK	4.46263	5.80518	0.768732	-0.379447	0.881432	0.118	0.303674	no
177	XLOC_020487	Akna	chr4:63028161-63064479	gcKO	WT	OK	7.71615	25.3966	0.303826	-1.71868	1.50576	0.00985	0.0521568	no
178	XLOC_021249	Akna	chr4:63028161-63064479	gcKO	WT	OK	18.4982	17.4327	1.06112	0.0855875	-0.184983	0.75305	0.870009	no
179	XLOC_004204	Hsf5	chr11:87430665-87473101	gcKO	WT	OK	54.3702	73.8971	0.735756	-0.442702	1.16547	0.04355	0.155306	no
180	XLOC_004045	Zzef1	chr11:72609561-72740622	gcKO	WT	OK	5.67296	3.73002	1.52089	0.604918	-1.38895	0.013	0.0647808	no
181	XLOC_005087	Gm11435	chr11:83325007-83335732	gcKO	WT	OK	13.0255	16.5863	0.785317	-0.348655	0.92086	0.133	0.327899	no
182	XLOC_019703	Rbm15	chr3:107129027-107136207	gcKO	WT	OK	12.5088	12.0871	1.03489	0.0494768	-0.13287	0.8235	0.911774	no
183	XLOC_020627	Agbl4	chr4:110070356-111330117	gcKO	WT	OK	27.6793	42.4974	0.651317	-0.618565	1.36985	0.0865	0.252016	no
184	XLOC_022351	Agbl5	chr5:31189038-31210161	gcKO	WT	OK	155.723	174.89	0.890405	-0.167461	0.383045	0.5003	0.700101	no
185	XLOC_014452	Gypc	chr18:32687973-32719688	gcKO	WT	OK	1.33977	1.37757	0.97256	-0.0401346	0.0489145	0.93745	0.968845	no
186	XLOC_027637	Ap2a1	chr7:52151202-52213661	gcKO	WT	OK	65.3988	79.4844	0.822788	-0.281408	0.393002	0.50375	0.70188	no
187	XLOC_023453	Git2	chr5:115177416-115223612	gcKO	WT	OK	3.41709	3.68597	0.927053	-0.109275	0.24715	0.6593	0.811804	no
188	XLOC_016538	Slc1a2	chr2:102498839-102630941	gcKO	WT	OK	9.68913	9.70188	0.998686	-0.00189768	0.0031128	0.99565	0.997516	no
189	XLOC_017634	Slc1a2	chr2:102498839-102630941	gcKO	WT	OK	16.0259	16.1544	0.992046	-0.0115257	0.0174187	0.97675	0.987225	no
190	XLOC_022581	Shroom3	chr5:93112460-93394785	gcKO	WT	OK	8.99627	10.5433	0.853269	-0.228927	0.590603	0.27395	0.497479	no
191	XLOC_000756	Ncoa2	chr1:13129172-13364164	gcKO	WT	OK	17.7251	14.2235	1.24618	0.317515	-0.879829	0.1311	0.32468	no
192	XLOC_004388	Fmnl1	chr11:103032451-103079786	gcKO	WT	OK	5.42678	4.74454	1.14379	0.193829	-0.180255	0.751	0.868533	no
193	XLOC_022642	Brdt	chr5:107760169-107816081	gcKO	WT	OK	81.1814	108.207	0.750242	-0.414577	1.05535	0.0788	0.236975	no
194	XLOC_015471	Mark2	chr19:7349807-7416355	gcKO	WT	OK	22.9711	18.8973	1.21558	0.281644	-0.658053	0.23955	0.459702	no
195	XLOC_025579	Gsg1	chr6:135187347-135204410	gcKO	WT	OK	903.685	1156.07	0.781687	-0.355342	0.676174	0.2019	0.417632	no
196	XLOC_025579	Gsg1	chr6:135187347-135204410	gcKO	WT	OK	903.685	1156.07	0.781687	-0.355342	0.676174	0.2019	0.417632	no
197	XLOC_023580	Gtf2i	chr5:134713703-134790693	gcKO	WT	OK	43.882	49.5104	0.886319	-0.174105	0.44049	0.428	0.642523	no
198	XLOC_023580	Gtf2i	chr5:134713703-134790693	gcKO	WT	OK	43.882	49.5104	0.886319	-0.174105	0.44049	0.428	0.642523	no
199	XLOC_016517	Ambra1	chr2:91570272-91759006	gcKO	WT	OK	27.4322	23.7687	1.15413	0.206806	-0.480416	0.3881	0.608253	no
200	XLOC_029621	Ash2l	chr8:26926939-26958142	gcKO	WT	OK	65.4218	89.1785	0.733605	-0.446925	1.15021	0.04115	0.149355	no
201	XLOC_019749	Cdc14a	chr3:115975470-116127116	gcKO	WT	OK	48.1099	69.1254	0.69598	-0.522882	1.38654	0.0129	0.0643719	no
202	XLOC_021573	Arid1a	chr4:133234865-133309581	gcKO	WT	OK	11.0507	7.64753	1.445	0.531072	-1.39428	0.0152	0.0721921	no
203	XLOC_004605	Znrf3	chr11:5176331-5344850	gcKO	WT	OK	3.74627	3.06098	1.22388	0.291465	-0.691583	0.2173	0.437036	no
204	XLOC_029961	Atxn1l	chr8:112250280-112261639	gcKO	WT	OK	12.332	14.41	0.855795	-0.224661	0.549165	0.3147	0.539351	no
205	XLOC_005114	Med13	chr11:86079216-86171153	gcKO	WT	OK	14.0075	12.2755	1.14109	0.190425	-0.497027	0.38535	0.605567	no
206	XLOC_004575	Foxk2	chr11:121121300-121171210	gcKO	WT	OK	17.1265	18.6542	0.918104	-0.123268	0.344857	0.55505	0.740342	no
207	XLOC_005189	Sp2	chr11:96805459-96839002	gcKO	WT	OK	2.76851	2.51474	1.10091	0.1387	-0.241322	0.65415	0.808514	no
208	XLOC_027885	4632434I11Rik	chr7:100006032-100023441	gcKO	WT	OK	14.8157	19.8129	0.74778	-0.419311	1.19132	0.0549	0.183682	no
209	XLOC_011443	Trmt2a	chr16:18248975-18289278	gcKO	WT	OK	5.9832	7.1884	0.832341	-0.264753	0.464793	0.4584	0.668773	no
210	XLOC_001131	Srgap2	chr1:133181827-133424039	gcKO	WT	OK	5.21935	6.59733	0.791131	-0.338012	0.763292	0.1848	0.398812	no
211	XLOC_026998	D430042O09Rik	chr7:132851389-133018311	gcKO	WT	OK	19.6393	22.3005	0.880666	-0.183336	0.500858	0.3919	0.611234	no
212	XLOC_027060	Btbd16	chr7:137917582-137969413	gcKO	WT	OK	47.9162	57.7718	0.829405	-0.269851	0.740414	0.20595	0.4226	no
213	XLOC_031855	Ptpn23	chr9:110287592-110310714	gcKO	WT	OK	4.21557	2.47581	1.7027	0.767831	-1.64517	0.0033	0.0224468	yes
214	XLOC_004413	Efcab3	chr11:104953532-104978854	gcKO	WT	OK	105.204	144.178	0.729681	-0.45467	0.879221	0.1158	0.300444	no
215	XLOC_006412	Tecpr2	chr12:112110819-112210604	gcKO	WT	OK	4.6492	3.47953	1.33616	0.418089	-0.843239	0.1356	0.331995	no
216	XLOC_010138	Dennd3	chr15:73342989-73402672	gcKO	WT	OK	1.31905	2.03248	0.648985	-0.62374	1.18676	0.03025	0.118806	no
217	XLOC_012074	Ltn1	chr16:87376895-87432858	gcKO	WT	OK	38.6212	62.3918	0.619011	-0.691965	1.54692	0.0047	0.0296942	yes
218	XLOC_016086	Armc3	chr2:19120686-19231885	gcKO	WT	OK	35.3984	52.513	0.674088	-0.568991	1.62983	0.00745	0.0425327	yes
219	XLOC_021281	Fam154a	chr4:86090601-86204215	gcKO	WT	OK	39.9541	36.1976	1.10378	0.142446	-0.239442	0.6812	0.82622	no
220	XLOC_022483	Chrna9	chr5:66343879-66368725	gcKO	WT	OK	3.44556	1.43101	2.40778	1.2677	-1.43634	0.01705	0.0776602	no
221	XLOC_022951	Lmtk2	chr5:144861304-144949073	gcKO	WT	OK	8.64628	6.88429	1.25594	0.328771	-0.894419	0.1236	0.312075	no
222	XLOC_028255	Mki67	chr7:142881470-142908097	gcKO	WT	OK	26.5284	39.7602	0.66721	-0.583791	1.3524	0.0238	0.0992127	no
223	XLOC_027138	Phrf1	chr7:148414076-148448650	gcKO	WT	OK	12.7282	12.6916	1.00288	0.0041476	-0.0104695	0.9849	0.991571	no
224	XLOC_031446	4931429I11Rik	chr9:40702896-40772195	gcKO	WT	OK	16.1811	20.9108	0.773815	-0.369939	0.994361	0.08725	0.253466	no
225	XLOC_031770	Cep63	chr9:102488907-102528454	gcKO	WT	OK	144.444	206.77	0.698573	-0.517518	1.43102	0.02465	0.101994	no
226	XLOC_017851	Kif16b	chr2:142444080-142727200	gcKO	WT	OK	8.48519	10.8471	0.782254	-0.354292	0.995781	0.1034	0.282665	no
227	XLOC_018035	Kcng1	chr2:168085819-168094831	gcKO	WT	OK	1.60325	3.4268	0.467856	-1.09587	1.50479	0.00945	0.0507205	no
228	XLOC_030838	Npat	chr9:53345151-53383732	gcKO	WT	OK	3.6014	5.0205	0.717339	-0.479273	1.29178	0.03435	0.130718	no
229	XLOC_000509	Apobec4	chr1:154364196-154613439	gcKO	WT	OK	16.5438	21.8241	0.758052	-0.399626	0.472552	0.41555	0.630617	no
230	XLOC_023541	Sbno1	chr5:124818579-124875989	gcKO	WT	OK	32.0075	40.5926	0.788506	-0.342808	0.874738	0.12365	0.312107	no
231	XLOC_011352	Zfp174	chr16:3847222-3858880	gcKO	WT	OK	1.86908	1.7426	1.07258	0.101087	-0.218465	0.71495	0.847088	no
232	XLOC_002544	Myo1a	chr10:127142311-127157996	gcKO	WT	OK	4.7616	7.44861	0.63926	-0.645525	1.51601	0.0076	0.043144	yes
233	XLOC_014091	Rbbp8	chr18:11791784-11901716	gcKO	WT	OK	10.7336	14.5464	0.737887	-0.438521	1.16359	0.0437	0.15573	no
234	XLOC_031640	Tln2	chr9:67064891-67407510	gcKO	WT	OK	25.3998	32.6519	0.777897	-0.362354	0.94436	0.09575	0.269314	no
235	XLOC_009193	Polr3a	chr14:25267915-25306268	gcKO	WT	OK	6.9414	6.1739	1.12431	0.169044	-0.449492	0.4564	0.666944	no
236	XLOC_010868	Fam186b	chr15:99101448-99117611	gcKO	WT	OK	20.1196	30.6457	0.656523	-0.607081	1.56372	0.00445	0.028386	yes
237	XLOC_021328	Gm12695	chr4:96390411-96453466	gcKO	WT	OK	3.19059	4.62229	0.690262	-0.534783	0.745493	0.1771	0.388639	no
238	XLOC_019623	Rprd2	chr3:95563795-95622876	gcKO	WT	OK	7.31353	4.91821	1.48703	0.572434	-1.44181	0.01055	0.0551427	no
239	XLOC_019853	Lphn2	chr3:148478549-148617625	gcKO	WT	OK	11.2689	10.279	1.0963	0.132659	-0.302268	0.6142	0.782262	no
240	XLOC_012680	Brpf3	chr17:28938070-28975734	gcKO	WT	OK	10.7442	11.5616	0.9293	-0.105784	0.244802	0.6568	0.810275	no
241	XLOC_023215	Pds5a	chr5:66000283-66089239	gcKO	WT	OK	10.5875	11.6714	0.907132	-0.14062	0.383944	0.5208	0.715594	no
242	XLOC_004921	Dnahc2	chr11:69234294-69362610	gcKO	WT	OK	18.0323	21.6049	0.834639	-0.260776	0.669421	0.22215	0.442702	no
243	XLOC_009544	Dgkh	chr14:78969224-79125945	gcKO	WT	OK	34.1284	52.291	0.652663	-0.61559	1.50465	0.00775	0.0436796	yes
244	XLOC_030054	Sipa1l2	chr8:127941962-128093671	gcKO	WT	OK	12.9315	11.6423	1.11073	0.151507	-0.398357	0.47195	0.679898	no
245	XLOC_002628	Stxbp5	chr10:9475344-9620838	gcKO	WT	OK	2.54363	2.36656	1.07482	0.104095	-0.264098	0.6485	0.804381	no
246	XLOC_007252	Hecw1	chr13:14298158-14616858	gcKO	WT	OK	12.4665	4.27359	2.9171	1.54453	-0.839425	0.1633	0.370259	no
247	XLOC_007738	Hecw1	chr13:14298158-14616858	gcKO	WT	OK	8.06574	9.40958	0.857184	-0.222323	0.540507	0.3607	0.583776	no
248	XLOC_007588	Ttc37	chr13:76236138-76326158	gcKO	WT	OK	4.14337	3.89379	1.0641	0.0896275	-0.222159	0.70675	0.842479	no
249	XLOC_021665	Prdm2	chr4:142697247-142802612	gcKO	WT	OK	15.2416	16.5307	0.922018	-0.117132	0.296359	0.57725	0.756338	no
250	XLOC_001169	Camsap2	chr1:138164699-138242697	gcKO	WT	OK	9.05972	12.1811	0.743752	-0.427102	1.17155	0.0412	0.149494	no
251	XLOC_022956	Trrap	chr5:145528996-145620642	gcKO	WT	OK	18.6997	13.5246	1.38264	0.467434	-1.22454	0.02745	0.110522	no
252	XLOC_031490	Cep164	chr9:45575028-45636757	gcKO	WT	OK	27.4159	24.7251	1.10883	0.149039	-0.368817	0.4915	0.692883	no
253	XLOC_020982	Chd5	chr4:151712759-151764308	gcKO	WT	OK	29.9787	38.574	0.777174	-0.363692	0.926114	0.09735	0.272138	no
254	XLOC_031280	Amotl1	chr9:14346410-14447999	gcKO	WT	OK	8.50943	11.5305	0.737993	-0.438316	1.15578	0.0394	0.144739	no
255	XLOC_022372	Plb1	chr5:32535053-32671189	gcKO	WT	OK	24.3706	32.0308	0.760849	-0.39432	0.676973	0.1995	0.414786	no
256	XLOC_006246	Ttll5	chr12:87156011-87394761	gcKO	WT	OK	70.1134	81.2591	0.862838	-0.212839	0.395779	0.50435	0.702288	no
257	XLOC_031513	Ncam1	chr9:49310250-49607174	gcKO	WT	OK	5.21573	5.45572	0.956011	-0.0649001	0.108047	0.85595	0.928098	no
258	XLOC_006406	Ppp2r5c	chr12:111685300-111821333	gcKO	WT	OK	64.7604	77.746	0.832974	-0.263655	0.689776	0.23235	0.451647	no
259	XLOC_023354	Mapk10	chr5:103336966-103640353	gcKO	WT	OK	5.6868	9.40994	0.60434	-0.726568	0.859064	0.12325	0.31141	no
260	XLOC_011812	Dgcr14	chr16:17840450-17911441	gcKO	WT	OK	9.88911	13.1071	0.754485	-0.406433	0.1722	0.7695	0.879669	no
261	XLOC_011446	Gnb1l	chr16:18498860-18566772	gcKO	WT	OK	5.31908	7.0147	0.758276	-0.399205	0.946384	0.09575	0.269314	no
262	XLOC_014074	9430020K01Rik	chr18:4634926-4682867	gcKO	WT	OK	19.8372	15.7623	1.25852	0.331729	-0.926433	0.11095	0.292544	no
263	XLOC_029838	Nfix	chr8:87231451-87324239	gcKO	WT	OK	4.18748	1.85506	2.25733	1.17462	-2.05176	3e-04	0.00288736	yes
264	XLOC_017167	Ndor1	chr2:25100235-25110934	gcKO	WT	OK	4.01681	3.8204	1.05141	0.0723253	-0.157707	0.768	0.878954	no
265	XLOC_010721	Mkl1	chr15:80808194-81021187	gcKO	WT	OK	9.14681	8.3515	1.09523	0.131234	-0.1627	0.76065	0.874687	no
266	XLOC_033236	Pja1	chrX:96661072-96666485	gcKO	WT	OK	52.5797	48.6608	1.08054	0.111747	-0.300555	0.5962	0.769053	no
267	XLOC_014176	Slc35a4	chr18:36830489-36843516	gcKO	WT	OK	5.62847	2.92266	1.9258	0.945461	-1.47427	0.00685	0.0398223	yes
268	XLOC_031189	Ubp1	chr9:113840004-113935869	gcKO	WT	OK	23.7711	30.3882	0.782248	-0.3543	0.944487	0.1518	0.355445	no
269	XLOC_016846	Ttll9	chr2:152766620-152834218	gcKO	WT	OK	54.2593	93.0109	0.583365	-0.777528	1.25596	0.0285	0.11371	no
270	XLOC_017897	Rbck1	chr2:152142069-152158375	gcKO	WT	OK	16.3355	16.5043	0.989772	-0.014832	0.0385575	0.94755	0.974023	no
271	XLOC_013083	Rsph3b	chr17:7109064-7152705	gcKO	WT	OK	20.3954	21.699	0.939923	-0.0893829	0.255421	0.6975	0.836534	no
272	XLOC_003916	Smcr8	chr11:60590916-60624777	gcKO	WT	OK	4.56575	5.04667	0.904705	-0.144481	0.205019	0.72115	0.851242	no
273	XLOC_016978	Arfgef2	chr2:166631080-166723615	gcKO	WT	OK	15.749	15.0033	1.0497	0.0699824	-0.185387	0.74275	0.863831	no
274	XLOC_004548	Chmp6	chr11:119775123-119780866	gcKO	WT	OK	26.5831	31.4932	0.84409	-0.244533	0.703551	0.2578	0.479202	no
275	XLOC_032364	Gm14374	chrX:5246184-5248144	gcKO	WT	NOTEST	0.245334	0.339233	0.723202	-0.467529	0	1	1	no
276	XLOC_032359	Gm14347	chrX:3907010-3908970	gcKO	WT	OK	1.55669	1.54049	1.01052	0.0150925	-0.0160844	0.9842	0.991184	no
277	XLOC_032899	Gm10922	chrX:3993613-3995573	gcKO	WT	NOTEST	0.185299	0.0765094	2.42191	1.27615	0	1	1	no
278	XLOC_013268	Tcp11	chr17:28203257-28218154	gcKO	WT	OK	639.495	763.744	0.837316	-0.256156	0.509457	0.34365	0.568226	no
279	XLOC_011759	Tekt5	chr16:10357957-10395557	gcKO	WT	OK	66.3981	117.4	0.565572	-0.822217	2.13847	0.00015	0.00153046	yes
280	XLOC_026211	Zfp541	chr7:16647151-16681679	gcKO	WT	OK	34.858	31.5578	1.10458	0.143496	-0.364963	0.51	0.706747	no
281	XLOC_004894	Arhgap44	chr11:64792536-64976463	gcKO	WT	OK	5.66505	4.59593	1.23262	0.301733	-0.446471	0.41925	0.633897	no
282	XLOC_032994	Gm2863	chrX:31349046-31350997	gcKO	WT	NOTEST	0.068663	0.118876	0.577602	-0.791847	0	1	1	no
283	XLOC_004039	Fbxo39	chr11:72127945-72133011	gcKO	WT	OK	47.1619	63.805	0.739157	-0.436048	1.16736	0.0392	0.144258	no
284	XLOC_002356	2210404O07Rik	chr10:80855808-80858456	gcKO	WT	OK	465.492	623.199	0.74694	-0.420938	0.646824	0.2041	0.420245	no
285	XLOC_006438	Zbtb42	chr12:113917050-113920958	gcKO	WT	OK	18.1289	18.8882	0.9598	-0.0591993	0.161997	0.7833	0.887848	no
286	XLOC_000751	Arfgef1	chr1:10127587-10222751	gcKO	WT	OK	14.9699	19.5831	0.76443	-0.387549	1.08871	0.0674	0.212673	no
287	XLOC_012467	Tulp4	chr17:6106719-6241145	gcKO	WT	OK	35.0521	33.3841	1.04996	0.0703384	-0.157552	0.7794	0.885425	no
288	XLOC_007254	AW209491	chr13:14722511-14730469	gcKO	WT	OK	5.53932	7.22408	0.766786	-0.383105	0.831262	0.15155	0.355058	no
289	XLOC_002951	Zfp938	chr10:81687601-81704020	gcKO	WT	OK	1.35492	1.90454	0.711416	-0.491236	0.639624	0.3278	0.552455	no
290	XLOC_026348	Cic	chr7:26058590-26079167	gcKO	WT	OK	9.03381	7.67711	1.17672	0.234772	-0.590304	0.27955	0.503318	no
291	XLOC_019650	Pde4dip	chr3:97493597-97692630	gcKO	WT	OK	57.9219	72.4757	0.799191	-0.323389	0.86702	0.1424	0.341749	no
292	XLOC_000306	Inpp5d	chr1:89516649-89617134	gcKO	WT	OK	3.45831	4.6804	0.738892	-0.436563	0.96129	0.06935	0.216864	no
293	XLOC_026417	Yif1b	chr7:30023341-30033486	gcKO	WT	OK	120.238	97.2748	1.23607	0.305756	-0.90442	0.1811	0.393873	no
294	XLOC_002521	Ppm1h	chr10:122115817-122382849	gcKO	WT	OK	7.40205	11.6389	0.635975	-0.652961	0.707483	0.21235	0.430562	no
295	XLOC_003114	Ppm1h	chr10:122115817-122382849	gcKO	WT	OK	7.2523	8.0772	0.897873	-0.155418	0.154526	0.7778	0.884682	no
296	XLOC_031934	Fyco1	chr9:123698627-123761020	gcKO	WT	OK	13.3225	15.6342	0.852138	-0.23084	0.640505	0.2746	0.498083	no
297	XLOC_014634	Slc14a2	chr18:78342882-78793689	gcKO	WT	OK	6.53756	4.15632	1.57292	0.653447	-0.812334	0.1836	0.39711	no
298	XLOC_014905	Slc14a2	chr18:78342882-78793689	gcKO	WT	OK	4.98769	3.33564	1.49527	0.580409	-0.983013	0.10525	0.285794	no
299	XLOC_031329	Keap1	chr9:21034173-21043776	gcKO	WT	OK	16.9829	21.9499	0.773712	-0.370135	1.00017	0.0923	0.262907	no
300	XLOC_031329	Keap1	chr9:21034173-21043776	gcKO	WT	OK	16.9829	21.9499	0.773712	-0.370135	1.00017	0.0923	0.262907	no
301	XLOC_030864	Sin3a	chr9:56919846-56976227	gcKO	WT	OK	12.6642	13.6363	0.928712	-0.106691	0.278469	0.61665	0.78384	no
302	XLOC_026601	Nav2	chr7:56214430-56865458	gcKO	WT	OK	5.39825	6.88057	0.784564	-0.350034	0.656665	0.22235	0.442866	no
303	XLOC_012947	Uhrf1	chr17:56442759-56463041	gcKO	WT	OK	30.126	43.6907	0.689529	-0.536314	1.44636	0.01115	0.0576076	no
304	XLOC_002747	Grik2	chr10:48819268-49513803	gcKO	WT	OK	2.4998	2.68693	0.930355	-0.104146	0.215444	0.71005	0.844169	no
305	XLOC_017641	Caprin1	chr2:103603101-103637797	gcKO	WT	OK	73.3162	92.7751	0.790257	-0.339606	0.502978	0.30535	0.530016	no
306	XLOC_010504	Ubr5	chr15:37897082-38008610	gcKO	WT	OK	83.7768	101.875	0.822349	-0.282184	0.660078	0.2536	0.474414	no
307	XLOC_029744	Gatad2a	chr8:72430967-72520278	gcKO	WT	OK	17.4674	13.6473	1.27992	0.356045	-0.934048	0.10085	0.27836	no
308	XLOC_012465	Synj2	chr17:5941279-6079763	gcKO	WT	OK	16.7785	21.4202	0.783303	-0.352362	0.836491	0.1429	0.342556	no
309	XLOC_013071	Synj2	chr17:5941279-6079763	gcKO	WT	OK	17.664	8.26571	2.13702	1.09561	-0.747553	0.51395	0.709754	no
310	XLOC_023143	Tbc1d14	chr5:36833252-36928875	gcKO	WT	OK	24.5895	27.8207	0.883856	-0.178113	0.473856	0.3936	0.61263	no
311	XLOC_029278	Gnao1	chr8:96334737-96493288	gcKO	WT	OK	6.92273	6.29506	1.09971	0.13712	-0.203153	0.73015	0.856492	no
312	XLOC_029886	Gnao1	chr8:96334737-96493288	gcKO	WT	OK	356.181	0	#DIV/0!	#VALUE!	NA	0.1363	0.332963	no
313	XLOC_022498	Slain2	chr5:73305509-73370756	gcKO	WT	OK	80.7691	99.6476	0.810547	-0.303031	0.754673	0.1931	0.409824	no
314	XLOC_028890	Arhgef7	chr8:11713312-11835219	gcKO	WT	OK	14.1608	14.6397	0.967288	-0.0479803	0.120368	0.8277	0.913926	no
315	XLOC_010522	Nudcd1	chr15:44206772-44269231	gcKO	WT	OK	9.94173	13.3234	0.746186	-0.422396	0.929663	0.1422	0.341498	no
316	XLOC_012973	Ppp4r1	chr17:66132694-66191288	gcKO	WT	OK	63.8769	93.7672	0.681229	-0.553789	1.3904	0.0109	0.0565019	no
317	XLOC_010747	Tcf20	chr15:82638911-82742564	gcKO	WT	OK	32.8327	35.6258	0.921599	-0.117786	0.308341	0.5882	0.763833	no
318	XLOC_015580	Fam189a2	chr19:24047230-24105509	gcKO	WT	OK	10.9018	8.65015	1.2603	0.333767	-0.763671	0.1637	0.370697	no
319	XLOC_029693	Stox2	chr8:48265401-48437702	gcKO	WT	OK	2.65134	3.63301	0.729792	-0.454442	1.12312	0.0484	0.167767	no
320	XLOC_022734	Ksr2	chr5:117864010-118217997	gcKO	WT	OK	1.6914	1.87341	0.902846	-0.147443	0.274073	0.6176	0.784175	no
321	XLOC_015431	Ehbp1l1	chr19:5703348-5726317	gcKO	WT	OK	45.5159	59.2019	0.768825	-0.379273	0.990497	0.0812	0.24159	no
322	XLOC_001095	Gm101	chr1:121819949-121893722	gcKO	WT	OK	12.898	16.0805	0.802089	-0.318164	0.558819	0.3397	0.564705	no
323	XLOC_017187	Camsap1	chr2:25782357-25838802	gcKO	WT	OK	45.064	55.2475	0.815675	-0.293935	0.76819	0.18315	0.396478	no
324	XLOC_022996	Uspl1	chr5:149996135-150027012	gcKO	WT	OK	15.0206	19.0081	0.790221	-0.339664	0.905584	0.123	0.311248	no
325	XLOC_011396	Mkl2	chr16:13247237-13417622	gcKO	WT	OK	12.5039	5.99661	2.08516	1.06016	-1.68685	0.007	0.0404509	yes
326	XLOC_000378	Zcchc2	chr1:107886982-107930788	gcKO	WT	OK	14.9651	14.0354	1.06624	0.092539	-0.244926	0.6693	0.818421	no
327	XLOC_000378	Zcchc2	chr1:107886982-107930788	gcKO	WT	OK	14.9651	14.0354	1.06624	0.092539	-0.244926	0.6693	0.818421	no
328	XLOC_000268	Rhbdd1	chr1:82313018-82441987	gcKO	WT	OK	28.6209	36.7823	0.778116	-0.361941	0.639262	0.2352	0.455214	no
329	XLOC_026407	Sirt2	chr7:29541192-29573684	gcKO	WT	OK	74.5308	48.9838	1.52154	0.605532	-1.39584	0.0295	0.116754	no
330	XLOC_026662	Klhl25	chr7:82993214-83019016	gcKO	WT	OK	21.5425	21.7772	0.989223	-0.0156316	0.0377972	0.9443	0.972284	no
331	XLOC_017649	Qser1	chr2:104594953-104656853	gcKO	WT	OK	2.23328	2.10173	1.06259	0.0875836	-0.220456	0.71185	0.84495	no
332	XLOC_000821	Fam178b	chr1:36619072-36740028	gcKO	WT	OK	162.42	202.168	0.803391	-0.315822	0.737361	0.20345	0.41956	no
333	XLOC_021354	Heatr8	chr4:106353021-106400535	gcKO	WT	OK	26.1938	29.1104	0.899809	-0.152308	0.377598	0.48275	0.687181	no
334	XLOC_033166	Tex28	chrX:71396282-71413177	gcKO	WT	OK	1.14664	1.57939	0.726002	-0.461957	0.456023	0.48925	0.691139	no
335	XLOC_023112	Eif2b4	chr5:31489930-31495512	gcKO	WT	OK	32.2094	42.1541	0.764087	-0.388193	0.977922	0.069	0.216255	no
336	XLOC_027101	Inpp5a	chr7:146575007-146768696	gcKO	WT	OK	18.2316	22.0497	0.826841	-0.274321	0.704658	0.2572	0.478653	no
337	XLOC_024776	Cecr2	chr6:120616330-120721209	gcKO	WT	OK	4.51224	4.7322	0.953518	-0.0686687	0.176175	0.7566	0.872265	no
338	XLOC_012780	Gpank1	chr17:35253054-35261761	gcKO	WT	OK	44.968	57.6808	0.779601	-0.359191	0.252117	0.64465	0.801783	no
339	XLOC_000599	Dedd	chr1:173259275-173291055	gcKO	WT	OK	40.296	47.5792	0.846925	-0.239695	0.53486	0.36495	0.587663	no
340	XLOC_010081	Oxr1	chr15:41279027-41692595	gcKO	WT	OK	45.7932	41.0032	1.11682	0.159396	-0.296798	0.6064	0.776548	no
341	XLOC_004143	Zfp207	chr11:80196780-80219375	gcKO	WT	OK	36.5954	35.7967	1.02231	0.0318361	-0.0881925	0.88105	0.940745	no
342	XLOC_004625	Tbrg4	chr11:6515600-6526070	gcKO	WT	OK	25.1947	25.4362	0.990506	-0.0137655	0.0265168	0.9641	0.981248	no
343	XLOC_004852	Zkscan17	chr11:59299019-59324569	gcKO	WT	OK	29.2563	33.1471	0.88262	-0.180139	0.460025	0.42175	0.636489	no
344	XLOC_029987	Kars	chr8:114517270-114535205	gcKO	WT	OK	35.5625	48.8817	0.727522	-0.458938	1.24758	0.0286	0.114019	no
345	XLOC_025341	Iqsec1	chr6:90609531-90837107	gcKO	WT	OK	16.2341	13.3287	1.21798	0.284488	-0.658785	0.24115	0.461528	no
346	XLOC_018728	Gpr160	chr3:30754854-30796117	gcKO	WT	OK	71.2454	84.183	0.846316	-0.240732	0.530141	0.3348	0.559597	no
347	XLOC_021507	CK137956	chr4:127604833-127648973	gcKO	WT	OK	38.2696	25.3715	1.50837	0.592991	-1.28603	0.00875	0.047918	yes
348	XLOC_022794	Ccdc62	chr5:124380697-124419904	gcKO	WT	OK	52.9806	84.0001	0.630721	-0.664927	1.28838	0.02205	0.0936268	no
349	XLOC_017591	Ptprj	chr2:90269912-90420804	gcKO	WT	OK	5.27702	6.12298	0.861839	-0.214511	0.502646	0.37055	0.592842	no
350	XLOC_022324	Dpp6	chr5:27143896-28054040	gcKO	WT	OK	2.00063	2.15647	0.927734	-0.108213	0.170311	0.75715	0.872397	no
351	XLOC_015053	Bscl2	chr19:8911418-8923177	gcKO	WT	OK	119.396	85.0442	1.40393	0.489473	-1.17384	0.0332	0.127384	no
352	XLOC_026594	Ldha	chr7:54101173-54110997	gcKO	WT	OK	385.105	511.355	0.753107	-0.409074	0.946397	0.0925	0.263238	no
353	XLOC_000420	Eif2d	chr1:133049783-133070048	gcKO	WT	OK	6.51792	6.43964	1.01216	0.0174308	-0.0366749	0.9457	0.973207	no
354	XLOC_016415	Ssrp1	chr2:84877276-84887271	gcKO	WT	OK	29.7314	44.6433	0.665977	-0.586456	1.51541	0.00625	0.036976	yes
355	XLOC_014514	Dpysl3	chr18:43480645-43552985	gcKO	WT	OK	127.911	199.079	0.642514	-0.638208	1.70827	0.0043	0.0275973	yes
356	XLOC_000528	Abl2	chr1:158488917-158579815	gcKO	WT	OK	5.09757	3.64564	1.39826	0.483636	-1.24861	0.02575	0.10528	no
357	XLOC_029316	Bean1	chr8:106694412-106742997	gcKO	WT	OK	4.65926	4.22948	1.10162	0.139621	-0.299157	0.5993	0.771236	no
358	XLOC_010782	Alg12	chr15:88635672-88657116	gcKO	WT	OK	6.71791	6.19182	1.08497	0.11765	-0.0858389	0.8886	0.944471	no
359	XLOC_006155	Lrrc9	chr12:73535251-73611553	gcKO	WT	OK	44.0428	69.1087	0.637297	-0.649962	1.75073	0.0026	0.0185493	yes
360	XLOC_024511	Fam188b	chr6:55153376-55270216	gcKO	WT	OK	36.5361	38.7201	0.943595	-0.0837592	0.203085	0.71435	0.846597	no
361	XLOC_001282	Pogk	chr1:168309297-168339959	gcKO	WT	OK	4.19968	3.90044	1.07672	0.106642	-0.188497	0.73905	0.862282	no
362	XLOC_019660	Fam46c	chr3:100271977-100293228	gcKO	WT	OK	189.237	285.512	0.662799	-0.593358	1.29742	0.01325	0.0650841	no
363	XLOC_028282	Syce1	chr7:147963127-147973753	gcKO	WT	OK	163.922	229.262	0.714999	-0.483993	1.4481	0.02525	0.103827	no
364	XLOC_026781	Pde2a	chr7:108570204-108661343	gcKO	WT	OK	4.41246	4.09217	1.07827	0.108717	-0.249101	0.66355	0.814482	no
365	XLOC_021415	Gm1661	chr4:116885768-116924522	gcKO	WT	OK	32.3482	35.1499	0.920293	-0.119836	0.31355	0.5813	0.759071	no
366	XLOC_007591	2210408I21Rik	chr13:77171410-77752940	gcKO	WT	OK	12.3828	17.7514	0.697568	-0.519599	0.982405	0.0942	0.266476	no
367	XLOC_026993	4930571K23Rik	chr7:132512374-132514527	gcKO	WT	OK	233.764	403.076	0.57995	-0.786	2.12893	0.00105	0.00874246	yes
368	XLOC_007892	Mak	chr13:41120384-41175075	gcKO	WT	OK	36.0143	47.6115	0.75642	-0.402742	1.09823	0.0536	0.180608	no
369	XLOC_000498	Fam5c	chr1:148342795-148749602	gcKO	WT	OK	3.19591	2.3521	1.35875	0.442274	-0.809714	0.1576	0.36317	no
370	XLOC_029897	Kifc3	chr8:97604803-97666440	gcKO	WT	OK	21.6291	26.8961	0.804172	-0.314424	0.377792	0.49755	0.697754	no
371	XLOC_016167	Ralgds	chr2:28368686-28408602	gcKO	WT	OK	43.1523	29.8167	1.44725	0.533318	-1.30848	0.01695	0.0773169	no
372	XLOC_030797	Bace1	chr9:45646611-45670735	gcKO	WT	OK	2.28585	2.26811	1.00782	0.011239	-0.0207014	0.9688	0.983652	no
373	XLOC_020623	Ttc39a	chr4:109079704-109117404	gcKO	WT	OK	48.136	67.9838	0.708051	-0.498076	1.32759	0.01785	0.0803714	no
374	XLOC_011489	Lpp	chr16:24392641-24992664	gcKO	WT	OK	6.96941	8.16851	0.853205	-0.229038	0.612877	0.2937	0.51741	no
375	XLOC_019038	Pdzk1	chr3:96602685-96709221	gcKO	WT	OK	70.8001	102.031	0.693908	-0.527179	1.14482	0.0601	0.195863	no
376	XLOC_008779	Lrrc18	chr14:33772732-34003162	gcKO	WT	OK	243.866	467.338	0.521819	-0.938379	2.63832	3e-04	0.00288736	yes
377	XLOC_009241	Wdfy4	chr14:33772732-34003162	gcKO	WT	OK	6.19318	5.60523	1.10489	0.143907	-0.101711	0.84955	0.925339	no
378	XLOC_031595	Lrrc49	chr9:60435033-60535941	gcKO	WT	OK	20.8254	29.4298	0.70763	-0.498933	1.33816	0.0172	0.0781309	no
379	XLOC_031595	Lrrc49	chr9:60435033-60535941	gcKO	WT	OK	20.8254	29.4298	0.70763	-0.498933	1.33816	0.0172	0.0781309	no
380	XLOC_026602	Htatip2	chr7:57014475-57029456	gcKO	WT	OK	22.716	21.6541	1.04904	0.0690701	-0.131696	0.81505	0.906935	no
381	XLOC_008825	Fbxo34	chr14:48085134-48151693	gcKO	WT	OK	23.95	25.8738	0.925647	-0.111466	0.212642	0.6649	0.815382	no
382	XLOC_002791	Hk1	chr10:61731500-61842691	gcKO	WT	OK	154.596	217.405	0.711097	-0.49188	1.14322	0.04325	0.154565	no
383	XLOC_003660	Dbnl	chr11:5688485-5700983	gcKO	WT	OK	11.1886	15.9002	0.703677	-0.50701	1.28075	0.0256	0.104837	no
384	XLOC_003637	Morc2a	chr11:3549445-3590415	gcKO	WT	OK	19.822	19.3683	1.02342	0.0334049	-0.0893948	0.8726	0.93674	no
385	XLOC_011559	Polq	chr16:37011871-37095503	gcKO	WT	OK	4.41768	4.96245	0.890222	-0.167763	0.155928	0.7534	0.870014	no
386	XLOC_004295	Rpl19	chr11:97884278-97891807	gcKO	WT	OK	256.165	399.45	0.641294	-0.640941	1.70679	0.0039	0.0257472	yes
387	XLOC_007977	H2afy	chr13:56174979-56236911	gcKO	WT	OK	23.4422	30.5275	0.767904	-0.381	1.00194	0.08115	0.241584	no
388	XLOC_010790	Plxnb2	chr15:88985924-89011511	gcKO	WT	OK	20.1861	27.7556	0.72728	-0.459416	1.20835	0.03155	0.122532	no
389	XLOC_006650	Tex21	chr12:77299676-77347733	gcKO	WT	OK	53.1095	70.9256	0.748806	-0.417335	1.17752	0.0494	0.17034	no
390	XLOC_017314	Nr6a1	chr2:38578889-38782019	gcKO	WT	OK	23.7778	32.4773	0.732136	-0.449818	1.22332	0.0343	0.130607	no
391	XLOC_021084	Orc3	chr4:34497863-34562191	gcKO	WT	OK	4.43725	5.11599	0.86733	-0.205347	0.35933	0.55055	0.736883	no
392	XLOC_002331	Csnk1g2	chr10:80046360-80103516	gcKO	WT	OK	252.827	435.202	0.580942	-0.783531	1.64621	0.0052	0.0319687	yes
393	XLOC_020787	Pum1	chr4:130219273-130337479	gcKO	WT	OK	18.2985	14.5072	1.26134	0.334959	-0.850623	0.1538	0.357463	no
394	XLOC_020698	Scmh1	chr4:120077858-120203406	gcKO	WT	OK	9.7686	12.862	0.759493	-0.396892	0.968918	0.07665	0.232739	no
395	XLOC_018045	Zfp217	chr2:169934142-169968175	gcKO	WT	OK	34.0789	48.2231	0.706692	-0.500843	1.32881	0.0186	0.0831226	no
396	XLOC_029599	Ikbkb	chr8:23769676-23830602	gcKO	WT	OK	5.84514	5.15272	1.13438	0.181904	-0.429454	0.4454	0.657371	no
397	XLOC_025179	Pde1c	chr6:56019797-56325157	gcKO	WT	OK	36.7425	54.0359	0.679965	-0.556469	1.26439	0.0285	0.11371	no
398	XLOC_025179	Pde1c	chr6:56019797-56325157	gcKO	WT	OK	36.7425	54.0359	0.679965	-0.556469	1.26439	0.0285	0.11371	no
399	XLOC_001233	Ralgps2	chr1:158734258-158869757	gcKO	WT	OK	23.7683	34.852	0.681978	-0.552201	1.58001	0.00765	0.043369	yes
400	XLOC_001226	Tor1aip1	chr1:157851728-157916004	gcKO	WT	OK	44.0412	65.7166	0.670169	-0.577402	1.28234	0.031	0.120938	no
401	XLOC_001226	Tor1aip1	chr1:157851728-157916004	gcKO	WT	OK	44.0412	65.7166	0.670169	-0.577402	1.28234	0.031	0.120938	no
402	XLOC_001268	Blzf1	chr1:166219930-166388486	gcKO	WT	OK	10.7525	14.7857	0.727223	-0.459524	0.788498	0.22465	0.44472	no
403	XLOC_005989	Pum2	chr12:8680939-8759389	gcKO	WT	OK	9.7745	9.64599	1.01332	0.0190937	-0.0530088	0.9288	0.964947	no
404	XLOC_001206	Smg7	chr1:154684121-154750385	gcKO	WT	OK	38.3655	47.4372	0.808764	-0.30621	0.394678	0.4564	0.666944	no
405	XLOC_000444	Plekha6	chr1:135142673-135200012	gcKO	WT	OK	19.7716	16.2904	1.2137	0.279412	-0.629793	0.2494	0.470022	no
406	XLOC_020878	Ubr4	chr4:138936434-139045589	gcKO	WT	OK	46.0911	44.0413	1.04654	0.0656316	-0.146915	0.78375	0.888038	no
407	XLOC_000127	Dnahc7b	chr1:46123582-46430395	gcKO	WT	OK	26.6126	28.0482	0.948817	-0.403008	0.0653634	0.4562	0.666846	no
408	XLOC_013456	Tdrd6	chr17:43752043-43767809	gcKO	WT	OK	100.657	146.044	0.689224	-0.536958	1.22523	0.0325	0.125157	no
409	XLOC_014414	Ss18	chr18:14784137-14841423	gcKO	WT	OK	16.587	19.4312	0.853627	-0.228318	0.613785	0.2904	0.514156	no
410	XLOC_022764	Tmem116	chr5:121902641-121945552	gcKO	WT	OK	10.2717	9.09469	1.12942	0.175578	-0.360728	0.5111	0.707491	no
411	XLOC_010763	Efcab6	chr15:83696690-83895779	gcKO	WT	OK	135.871	213.94	0.635089	-0.654971	1.51038	0.0053	0.0324485	yes
412	XLOC_010763	Efcab6	chr15:83696690-83895779	gcKO	WT	OK	135.871	213.94	0.635089	-0.654971	1.51038	0.0053	0.0324485	yes
413	XLOC_024556	4930544G11Rik	chr6:65902564-65904008	gcKO	WT	OK	133.538	176.926	0.754768	-0.405897	1.26444	0.05595	0.186179	no
414	XLOC_021704	Fbxo44	chr4:147526838-147540640	gcKO	WT	OK	51.8534	59.5287	0.871066	-0.199149	0.501883	0.42	0.634534	no
415	XLOC_021704	Fbxo44	chr4:147526838-147540640	gcKO	WT	OK	51.8534	59.5287	0.871066	-0.199149	0.501883	0.42	0.634534	no
416	XLOC_019033	Pex11b	chr3:96439279-96449355	gcKO	WT	OK	32.6126	25.7773	1.26517	0.339332	-0.627054	0.23765	0.457769	no
417	XLOC_021524	Lck	chr4:129225587-129250885	gcKO	WT	OK	1.81757	1.80893	1.00478	0.0068769	-0.00895092	0.98605	0.991944	no
418	XLOC_010349	Troap	chr15:98905403-98913840	gcKO	WT	OK	4.87454	4.45735	1.0936	0.129079	-0.256383	0.63835	0.797303	no
419	XLOC_026656	Fam174b	chr7:80885192-80929507	gcKO	WT	OK	3.06825	3.37345	0.909529	-0.136807	0.181543	0.73615	0.860738	no
420	XLOC_027786	Fam174b	chr7:80885192-80929507	gcKO	WT	OK	2.13511	3.56889	0.598256	-0.741164	0.497842	0.39865	0.616669	no
421	XLOC_027787	Fam174b	chr7:80885192-80929507	gcKO	WT	OK	4.52159	4.49235	1.00651	0.00936071	-0.0129591	0.98235	0.990194	no
422	XLOC_002824	Phyhipl	chr10:69903415-70062039	gcKO	WT	OK	65.4838	100.727	0.650112	-0.621238	1.75674	0.0043	0.0275973	yes
423	XLOC_013479	Ttbk1	chr17:46577509-46624624	gcKO	WT	OK	27.453	23.5648	1.165	0.220333	-0.538254	0.3179	0.54254	no
424	XLOC_013284	Tmem217	chr17:29662917-29686608	gcKO	WT	OK	64.2903	60.4052	1.06432	0.0899287	-0.214914	0.6945	0.83449	no
425	XLOC_007287	Pom121l2	chr13:22073049-22080603	gcKO	WT	OK	52.8899	38.223	1.38372	0.468551	-1.06858	0.0489	0.169034	no
426	XLOC_026872	Dchs1	chr7:112901502-112936064	gcKO	WT	OK	33.3009	0	#DIV/0!	#VALUE!	NA	0.1873	0.40241	no
427	XLOC_028027	Dchs1	chr7:112901502-112936064	gcKO	WT	OK	1.64901	2.315	0.712315	-0.489416	1.14263	0.04215	0.151757	no
428	XLOC_013215	Eme2	chr17:25023618-25032058	gcKO	WT	OK	9.89929	9.77709	1.0125	0.0179199	-0.0137327	0.98195	0.989921	no
429	XLOC_006054	Cog5	chr12:32339733-32635829	gcKO	WT	OK	12.8397	12.9639	0.99042	-0.0138801	0.0225477	0.9684	0.983433	no
430	XLOC_010719	Enthd1	chr15:80282142-80395597	gcKO	WT	OK	35.1443	40.8429	0.860475	-0.216797	0.442891	0.41965	0.634349	no
431	XLOC_006603	Fscb	chr12:65572319-65575885	gcKO	WT	OK	90.0653	129.043	0.697948	-0.518808	1.37162	0.02005	0.0873063	no
432	XLOC_002899	Med16	chr10:79357451-79371683	gcKO	WT	OK	43.3859	41.1526	1.05427	0.0762438	-0.18942	0.7397	0.86268	no
433	XLOC_019687	Cttnbp2nl	chr3:104804832-104856064	gcKO	WT	OK	7.60276	6.82979	1.11318	0.15468	-0.392412	0.49845	0.698525	no
434	XLOC_004141	Rhot1	chr11:80022492-80081409	gcKO	WT	OK	17.067	22.3193	0.764675	-0.387078	1.07185	0.06635	0.210364	no
435	XLOC_019819	4930579F01Rik	chr3:137827039-137856814	gcKO	WT	OK	40.4678	51.6075	0.784146	-0.350806	0.954602	0.0989	0.27485	no
436	XLOC_008821	Samd4	chr14:47502639-47725492	gcKO	WT	OK	36.0166	47.5016	0.758219	-0.399314	1.04142	0.0668	0.211337	no
437	XLOC_010152	Rhpn1	chr15:75534709-75544985	gcKO	WT	OK	8.68167	14.5783	0.59552	-0.747774	1.80664	0.00125	0.0101127	yes
438	XLOC_025129	Zfp746	chr6:48012393-48036592	gcKO	WT	OK	5.30859	4.57374	1.16067	0.214954	-0.53224	0.38185	0.602785	no
439	XLOC_010334	Pfkm	chr15:97869129-97962926	gcKO	WT	OK	42.8156	53.3819	0.802062	-0.318215	0.633004	0.25505	0.476382	no
440	XLOC_019525	Sema4a	chr3:88239882-88265104	gcKO	WT	OK	8.58063	8.95874	0.957794	-0.062211	0.148694	0.78235	0.887212	no
441	XLOC_022395	Rgs12	chr5:35292046-35382257	gcKO	WT	OK	21.2664	16.1561	1.31631	0.396498	-1.09006	0.06385	0.204659	no
442	XLOC_022658	Tmem175	chr5:108998299-109089803	gcKO	WT	OK	28.5604	28.4014	1.0056	0.00805439	-0.0156973	0.98025	0.98925	no
443	XLOC_031168	Kif9	chr9:110379461-110427678	gcKO	WT	OK	90.2024	158.472	0.569201	-0.812992	1.99495	0.00045	0.00416661	yes
444	XLOC_023175	Prom1	chr5:44384792-44493121	gcKO	WT	OK	20.4903	43.7962	0.467856	-1.09586	2.8678	5e-05	0.000597811	yes
445	XLOC_027145	Pnpla2	chr7:148640209-148646642	gcKO	WT	OK	58.7459	63.2779	0.928379	-0.107212	0.2707	0.61915	0.785254	no
446	XLOC_017727	Rpap1	chr2:119589694-119613273	gcKO	WT	OK	5.95359	4.59113	1.29676	0.374909	-0.882757	0.1057	0.286737	no
447	XLOC_012612	Spsb3	chr17:25023618-25032058	gcKO	WT	OK	75.2814	98.9279	0.760972	-0.394085	1.09779	0.0817	0.242246	no
448	XLOC_030992	Ick	chr9:77956998-78019916	gcKO	WT	OK	3.28105	2.56153	1.28089	0.357151	-0.882922	0.1381	0.3355	no
449	XLOC_022522	C530008M17Rik	chr5:77106199-77302900	gcKO	WT	OK	86.5315	97.1148	0.891023	-0.166466	0.410369	0.48385	0.687694	no
450	XLOC_013094	Pabpc6	chr17:9859361-9862569	gcKO	WT	OK	100.324	120.239	0.834372	-0.261237	0.755461	0.23625	0.456359	no
451	XLOC_021718	Pik3cd	chr4:149023226-149075738	gcKO	WT	OK	21.4467	19.2883	1.1119	0.153028	-0.387044	0.4834	0.687508	no
452	XLOC_021718	Pik3cd	chr4:149023226-149075738	gcKO	WT	OK	21.4467	19.2883	1.1119	0.153028	-0.387044	0.4834	0.687508	no
453	XLOC_009524	Spert	chr14:75982640-75992923	gcKO	WT	OK	356.044	550.795	0.646418	-0.629461	1.45279	0.00805	0.0448074	yes
454	XLOC_009524	Spert	chr14:75982640-75992923	gcKO	WT	OK	356.044	550.795	0.646418	-0.629461	1.45279	0.00805	0.0448074	yes
455	XLOC_009524	Spert	chr14:75982640-75992923	gcKO	WT	OK	356.044	550.795	0.646418	-0.629461	1.45279	0.00805	0.0448074	yes
456	XLOC_002639	Pex3	chr10:13243538-13283182	gcKO	WT	OK	47.0967	57.8484	0.81414	-0.296653	0.835929	0.21885	0.438993	no
457	XLOC_025636	1700034J05Rik	chr6:146837015-146980545	gcKO	WT	OK	96.8828	114.472	0.846345	-0.240688	0.549304	0.3121	0.536726	no
458	XLOC_006809	Wars	chr12:110098168-110132384	gcKO	WT	OK	11.4354	14.5582	0.785495	-0.348319	0.805082	0.14445	0.345086	no
459	XLOC_025060	Cnot4	chr6:34971973-35083745	gcKO	WT	OK	16.1509	14.0509	1.14946	0.200953	-0.518623	0.36135	0.584526	no
460	XLOC_025060	Cnot4	chr6:34971973-35083745	gcKO	WT	OK	16.1509	14.0509	1.14946	0.200953	-0.518623	0.36135	0.584526	no
461	XLOC_008777	Fam170b	chr14:33647147-33649974	gcKO	WT	OK	67.4252	106.855	0.630997	-0.664288	2.02476	0.0016	0.0124549	yes
462	XLOC_014571	Ablim3	chr18:61949579-62071506	gcKO	WT	OK	1.7897	1.67241	1.07013	0.09779	-0.170726	0.7495	0.867718	no
463	XLOC_002203	Ctnna3	chr10:62892817-64466962	gcKO	WT	OK	16.3793	31.2367	0.524361	-0.931367	1.87869	0.01185	0.0600872	no
464	XLOC_029230	Trmt1	chr8:87213145-87223707	gcKO	WT	OK	37.6305	39.4632	0.953559	-0.0686048	0.173622	0.75235	0.869401	no
465	XLOC_011432	Smpd4	chr16:17619446-17645166	gcKO	WT	OK	24.2993	23.9049	1.0165	0.0236044	-0.0606664	0.91175	0.95753	no
466	XLOC_010267	Arhgap8	chr15:84545058-84602637	gcKO	WT	OK	1.80992	2.16432	0.836253	-0.25799	0.276154	0.6041	0.774788	no
467	XLOC_025247	Dnahc6	chr6:72967600-73171797	gcKO	WT	OK	13.5152	17.3039	0.781049	-0.35651	0.969711	0.0917	0.261583	no
468	XLOC_016358	B230120H23Rik	chr2:72123693-72280667	gcKO	WT	OK	6.26185	4.83733	1.29448	0.372379	-0.766411	0.1708	0.380633	no
469	XLOC_019555	Ubap2l	chr3:89799375-89856527	gcKO	WT	OK	35.9976	37.4197	0.961996	-0.0558966	0.123661	0.82645	0.91347	no
470	XLOC_016513	Ckap5	chr2:91366507-91460822	gcKO	WT	OK	18.9031	21.1958	0.891832	-0.165154	0.458935	0.45835	0.668743	no
471	XLOC_024658	Mgll	chr6:88674405-88778354	gcKO	WT	OK	30.4306	37.6023	0.809275	-0.305298	0.779261	0.16645	0.37446	no
472	XLOC_014156	Kif20a	chr18:34739495-34811390	gcKO	WT	OK	22.7561	33.8135	0.672989	-0.571351	0.980256	0.09155	0.261215	no
473	XLOC_004507	Sec14l1	chr11:116976485-117020582	gcKO	WT	OK	55.6072	59.5818	0.933292	-0.0996009	0.245942	0.65815	0.811104	no
474	XLOC_004507	Sec14l1	chr11:116976485-117020582	gcKO	WT	OK	55.6072	59.5818	0.933292	-0.0996009	0.245942	0.65815	0.811104	no
475	XLOC_004946	Eif5a	chr11:69730213-69735460	gcKO	WT	OK	292.282	301.343	0.969931	-0.0440473	0.109638	0.84355	0.922025	no
476	XLOC_004946	Eif5a	chr11:69730213-69735460	gcKO	WT	OK	292.282	301.343	0.969931	-0.0440473	0.109638	0.84355	0.922025	no
477	XLOC_004191	Bcas3	chr11:85166557-85645890	gcKO	WT	OK	10.9274	11.7561	0.929509	-0.105462	0.268387	0.6471	0.803301	no
478	XLOC_004822	Gemin5	chr11:57933502-57982041	gcKO	WT	OK	21.3269	17.7928	1.19863	0.261379	-0.690772	0.212	0.430234	no
479	XLOC_004822	Gemin5	chr11:57933502-57982041	gcKO	WT	OK	21.3269	17.7928	1.19863	0.261379	-0.690772	0.212	0.430234	no
480	XLOC_010106	Wdr67	chr15:57743594-57801623	gcKO	WT	OK	10.9048	12.7521	0.855138	-0.225773	0.586199	0.30635	0.531201	no
481	XLOC_025576	Gpr19	chr6:134819109-134847943	gcKO	WT	OK	17.4414	16.3755	1.06509	0.0909689	-0.2097	0.691	0.831995	no
482	XLOC_025576	Gpr19	chr6:134819109-134847943	gcKO	WT	OK	17.4414	16.3755	1.06509	0.0909689	-0.2097	0.691	0.831995	no
483	XLOC_025576	Gpr19	chr6:134819109-134847943	gcKO	WT	OK	17.4414	16.3755	1.06509	0.0909689	-0.2097	0.691	0.831995	no
484	XLOC_005466	Dnahc17	chr11:117848170-117991996	gcKO	WT	OK	49.6355	55.4595	0.894986	-0.160062	0.354277	0.52755	0.720945	no
485	XLOC_024749	Ift122	chr6:115790714-115876754	gcKO	WT	OK	60.573	87.9662	0.688594	-0.538276	1.34242	0.0159	0.0745581	no
486	XLOC_005987	1110057K04Rik	chr12:8214912-8292565	gcKO	WT	OK	3.05981	3.54648	0.862774	-0.212944	0.342018	0.53195	0.723308	no
487	XLOC_015615	Rnls	chr19:33212078-33466785	gcKO	WT	OK	57.2783	56.8769	1.00706	0.0101459	-0.0260464	0.96495	0.981597	no
488	XLOC_027692	Hps5	chr7:54015835-54051399	gcKO	WT	OK	7.14612	8.53863	0.836916	-0.256844	0.633561	0.2477	0.468083	no
489	XLOC_010599	Slc45a4	chr15:73407843-73475947	gcKO	WT	OK	15.7093	9.69889	1.6197	0.695724	-1.80584	0.0017	0.0130994	yes
490	XLOC_002539	R3hdm2	chr10:126817974-126936440	gcKO	WT	OK	8.14423	5.71759	1.42442	0.510371	-1.23136	0.0242	0.100447	no
491	XLOC_032458	Gm2825	chrX:30977792-30979742	gcKO	WT	NOTEST	0.0819058	0.0121969	6.7153	2.74745	0	1	1	no
492	XLOC_031142	Usp19	chr9:108392914-108404668	gcKO	WT	OK	34.0495	33.6147	1.01293	0.0185432	-0.0478538	0.93095	0.965902	no
493	XLOC_026644	Ttc23	chr7:74790370-74871466	gcKO	WT	OK	24.2997	46.1744	0.526259	-0.926155	2.4243	5e-05	0.000597811	yes
494	XLOC_026342	Zfp574	chr7:25862223-25868511	gcKO	WT	OK	59.0463	48.5642	1.21584	0.281952	-0.692498	0.21445	0.433455	no
495	XLOC_015613	Sgms1	chr19:32197216-32465674	gcKO	WT	OK	100.141	143.353	0.698562	-0.517541	1.26329	0.0523	0.177537	no
496	XLOC_002424	Tmcc3	chr10:93774808-94053699	gcKO	WT	OK	6.92952	5.27085	1.31469	0.394721	-0.999153	0.0806	0.240517	no
497	XLOC_022375	Depdc5	chr5:33206369-33337001	gcKO	WT	OK	7.96477	8.48011	0.93923	-0.0904507	0.208631	0.71515	0.847146	no
498	XLOC_009025	Rcbtb2	chr14:73542316-73583861	gcKO	WT	OK	11.9191	13.9972	0.851535	-0.231863	0.619862	0.28315	0.506605	no
499	XLOC_029979	Wdr59	chr8:113972639-114046024	gcKO	WT	OK	3.85349	4.90803	0.78514	-0.348977	0.814629	0.1379	0.335209	no
500	XLOC_022284	Magi2	chr5:18732813-20210610	gcKO	WT	OK	20.7217	30.9918	0.668619	-0.580741	1.58187	0.1961	0.411154	no
501	XLOC_029343	Lrrc36	chr8:107937521-107988090	gcKO	WT	OK	36.1466	42.0001	0.860631	-0.216532	0.544513	0.31225	0.536837	no
502	XLOC_014523	Trim36	chr18:46324953-46372261	gcKO	WT	OK	72.7266	135.614	0.536276	-0.898954	2.27789	0.00125	0.0101127	yes
503	XLOC_030040	Dbndd1	chr8:126028568-126042688	gcKO	WT	OK	20.4411	21.7013	0.94193	-0.0863083	0.1969	0.72295	0.852225	no
504	XLOC_021353	Ttc4	chr4:106334412-106351549	gcKO	WT	OK	41.2288	48.6567	0.847341	-0.238984	0.650822	0.25375	0.474659	no
505	XLOC_028182	Aldoa	chr7:133938745-133952789	gcKO	WT	OK	226.15	220.368	1.02624	0.0373687	-0.114472	0.8668	0.933079	no
506	XLOC_007970	Dbn1	chr13:55574788-55589437	gcKO	WT	OK	13.716	10.0089	1.37038	0.45457	-1.06619	0.04535	0.159864	no
507	XLOC_029711	Gm15881	chr8:60252692-61390424	gcKO	WT	OK	9.88636	4.78943	2.0642	1.04559	-0.615297	0.29015	0.513858	no
508	XLOC_016713	Sirpa	chr2:129404006-129457964	gcKO	WT	OK	2.89616	1.78368	1.6237	0.699284	-1.26724	0.02375	0.0990701	no
509	XLOC_017122	Pfkfb3	chr2:11393057-11475556	gcKO	WT	OK	36.5897	53.6919	0.681475	-0.553269	1.27231	0.01915	0.0849458	no
510	XLOC_017122	Pfkfb3	chr2:11393057-11475556	gcKO	WT	OK	36.5897	53.6919	0.681475	-0.553269	1.27231	0.01915	0.0849458	no
511	XLOC_031620	Dis3l	chr9:64154562-64189064	gcKO	WT	OK	66.579	99.958	0.66607	-0.586255	1.51	0.00695	0.040236	yes
512	XLOC_032868	Phka2	chrX:156940097-157036810	gcKO	WT	OK	5.33171	5.68006	0.938671	-0.0913087	0.219327	0.68985	0.831288	no
513	XLOC_029083	Mfap3l	chr8:63111656-63155528	gcKO	WT	OK	20.4183	32.5763	0.626784	-0.673962	1.89652	0.00155	0.0121258	yes
514	XLOC_025433	Wnk1	chr6:119873984-119989510	gcKO	WT	OK	18.3757	13.0923	1.40355	0.489079	-1.30811	0.02185	0.0929661	no
515	XLOC_003704	Usp34	chr11:23206843-23399678	gcKO	WT	OK	16.5811	19.6747	0.842763	-0.138778	0.548357	0.6186	0.784849	no
516	XLOC_023075	Abcf2	chr5:24071158-24083285	gcKO	WT	OK	110.502	120.505	0.916991	-0.125014	0.316637	0.56985	0.750466	no
517	XLOC_000958	Aamp	chr1:74326411-74400266	gcKO	WT	OK	168.344	210.333	0.800369	-0.321256	0.779901	0.2052	0.42168	no
518	XLOC_012930	Kat2b	chr17:53706295-53812046	gcKO	WT	OK	9.16992	9.97668	0.919135	-0.121651	0.318965	0.5849	0.761634	no
519	XLOC_026768	Kcne3	chr7:107325176-107333405	gcKO	WT	OK	46.2731	59.692	0.775198	-0.367364	0.936551	0.0845	0.247885	no
520	XLOC_026768	Kcne3	chr7:107325176-107333405	gcKO	WT	OK	46.2731	59.692	0.775198	-0.367364	0.936551	0.0845	0.247885	no
521	XLOC_000939	Lancl1	chr1:67047090-67085510	gcKO	WT	OK	58.6563	85.3424	0.687305	-0.540976	1.37437	0.016	0.0748594	no
522	XLOC_005493	Nploc4	chr11:120240219-120299112	gcKO	WT	OK	38.4722	37.4688	1.02678	0.0381296	-0.0979888	0.85495	0.927544	no
523	XLOC_027623	Acpt	chr7:51502024-51516734	gcKO	WT	OK	8.1136	4.33387	1.87214	0.904687	-0.122367	0.8509	0.925829	no
524	XLOC_032506	Gm362	chrX:40944165-40946707	gcKO	WT	OK	14.9004	20.8313	0.715289	-0.483399	1.42743	0.02895	0.115122	no
525	XLOC_010489	Rgs22	chr15:35938189-36070216	gcKO	WT	OK	59.9656	87.3679	0.686357	-0.542968	1.45448	0.01325	0.0650841	no
526	XLOC_006253	Gm6772	chr12:88075309-88104749	gcKO	WT	OK	48.8795	94.1667	0.519074	-0.945987	2.47317	5e-05	0.000597811	yes
527	XLOC_025367	Foxp1	chr6:98875335-99385339	gcKO	WT	OK	7.71035	7.74676	0.9953	-0.00679648	0.0140192	0.9809	0.989447	no
528	XLOC_016016	Sfmbt2	chr2:10292077-10516880	gcKO	WT	OK	12.5967	16.523	0.762374	-0.391429	0.876223	0.11895	0.305399	no
529	XLOC_018909	Arhgef2	chr3:88411355-88452026	gcKO	WT	OK	52.6424	66.1943	0.795271	-0.330482	0.817167	0.1322	0.326535	no
530	XLOC_018909	Arhgef2	chr3:88411355-88452026	gcKO	WT	OK	52.6424	66.1943	0.795271	-0.330482	0.817167	0.1322	0.326535	no
531	XLOC_001300	Gm7694	chr1:172228323-172236463	gcKO	WT	OK	1.6343	0.74372	2.19747	1.13584	-1.52406	0.0151	0.0717714	no
532	XLOC_010699	Pla2g6	chr15:79116571-79158966	gcKO	WT	OK	84.8521	105.889	0.801331	-0.319528	0.797534	0.1505	0.353522	no
533	XLOC_010699	Pla2g6	chr15:79116571-79158966	gcKO	WT	OK	84.8521	105.889	0.801331	-0.319528	0.797534	0.1505	0.353522	no
534	XLOC_007730	Lgals8	chr13:12531676-12557212	gcKO	WT	OK	61.4154	71.395	0.86022	-0.217222	0.474919	0.4065	0.623475	no
535	XLOC_013370	Prrc2a	chr17:35286019-35302504	gcKO	WT	OK	30.3431	16.7694	1.80943	0.855542	-2.11332	0.00015	0.00153046	yes
536	XLOC_000911	Wdr12	chr1:60133460-60208311	gcKO	WT	OK	47.0253	63.2685	0.743266	-0.428049	1.13882	0.0595	0.194665	no
537	XLOC_000911	Wdr12	chr1:60133460-60208311	gcKO	WT	OK	47.0253	63.2685	0.743266	-0.428049	1.13882	0.0595	0.194665	no
538	XLOC_013465	Slc29a1	chr17:45722148-45736552	gcKO	WT	OK	36.1091	28.2878	1.27649	0.352182	-0.918028	0.104	0.283749	no
539	XLOC_014254	Sncaip	chr18:52927464-53075588	gcKO	WT	OK	3.57389	3.91248	0.913459	-0.130586	0.290717	0.61615	0.783561	no
540	XLOC_021262	Aldoart1	chr4:72511616-72513668	gcKO	WT	OK	19.0185	47.0107	0.404557	-1.30558	3.92991	5e-05	0.000597811	yes
541	XLOC_031321	Dnmt1	chr9:20711649-20764332	gcKO	WT	OK	11.7433	11.8005	0.995153	-0.00700685	0.0186905	0.97455	0.986409	no
542	XLOC_023052	Fbxl13	chr5:20989662-21151479	gcKO	WT	OK	50.6027	72.0659	0.702173	-0.5101	0.720838	0.18635	0.400849	no
543	XLOC_028250	D7Ertd443e	chr7:141457464-141568511	gcKO	WT	OK	40.2014	43.777	0.918322	-0.122928	0.317287	0.5581	0.742282	no
544	XLOC_029003	Tti2	chr8:32260787-32279196	gcKO	WT	OK	5.61004	7.18569	0.780724	-0.357115	0.549858	0.35925	0.582442	no
545	XLOC_014643	Atp9b	chr18:80930842-81130897	gcKO	WT	OK	34.7457	37.3009	0.931498	-0.102375	0.252384	0.6522	0.807137	no
546	XLOC_013444	Crisp2	chr17:40899586-40931095	gcKO	WT	OK	661.273	1312.47	0.503839	-0.988968	2.25784	5e-04	0.00457226	yes
547	XLOC_011385	Clec16a	chr16:10545431-10745037	gcKO	WT	OK	10.2176	9.11009	1.12157	0.165514	-0.38466	0.4747	0.681827	no
548	XLOC_025610	Recql	chr6:142293986-142335607	gcKO	WT	OK	18.1419	24.8613	0.729725	-0.45458	1.12627	0.0586	0.192574	no
549	XLOC_022810	Scarb1	chr5:125757454-125821464	gcKO	WT	OK	4.08984	4.78016	0.855586	-0.225017	0.173459	0.76025	0.874427	no
550	XLOC_023548	Scarb1	chr5:125757454-125821464	gcKO	WT	OK	41.5173	32.4685	1.27869	0.35467	-0.963981	0.12065	0.307688	no
551	XLOC_008878	Abhd4	chr14:54873803-54889381	gcKO	WT	OK	125.914	82.4708	1.52677	0.610483	-1.49709	0.00675	0.0393959	yes
552	XLOC_013249	Itfg3	chr17:26349553-26381225	gcKO	WT	OK	17.8077	21.1749	0.840982	-0.24985	0.622605	0.23985	0.460102	no
553	XLOC_026865	Fam160a2	chr7:112519724-112548568	gcKO	WT	NOTEST	0.517215	0.243072	2.12783	1.08938	0	1	1	no
554	XLOC_028018	Fam160a2	chr7:112519724-112548568	gcKO	WT	OK	5.23024	5.21289	1.00333	0.00479411	-0.0088975	0.9861	0.991944	no
555	XLOC_014138	Ammecr1l	chr18:31919477-31943737	gcKO	WT	OK	34.6325	48.8978	0.708263	-0.497645	0.761811	0.15835	0.36383	no
556	XLOC_017929	Ncoa6	chr2:155216391-155299486	gcKO	WT	OK	21.4148	17.2068	1.24455	0.315634	-0.800291	0.17365	0.384427	no
557	XLOC_001317	Nit1	chr1:173259275-173291055	gcKO	WT	OK	28.3972	38.5337	0.736945	-0.440376	0.697371	0.3122	0.536837	no
558	XLOC_028266	E030019B06Rik	chr7:146786537-146869761	gcKO	WT	OK	28.5112	28.7523	0.991615	-0.0121535	0.0274652	0.9659	0.982165	no
559	XLOC_032363	Gm3763	chrX:4598165-4600108	gcKO	WT	NOTEST	0.182326	0.316673	0.575755	-0.796475	0	1	1	no
560	XLOC_022389	Fam193a	chr5:34712561-34829352	gcKO	WT	OK	19.3731	22.1088	0.876262	-0.190568	0.518596	0.3615	0.584581	no
561	XLOC_007865	Serpinb6a	chr13:34009786-34094663	gcKO	WT	OK	77.6106	94.3259	0.822792	-0.2814	0.791439	0.24055	0.460801	no
562	XLOC_032971	4930453H23Rik	chrX:20752727-20798791	gcKO	WT	OK	19.2341	30.4037	0.632624	-0.660576	1.78197	0.0238	0.0992127	no
563	XLOC_000880	Dnahc7a	chr1:53453842-53763644	gcKO	WT	OK	13.6439	18.8281	0.724656	-0.464629	1.27417	0.0312	0.121417	no
564	XLOC_004360	Nbr1	chr11:101413292-101443265	gcKO	WT	OK	107.519	168.977	0.636294	-0.652236	1.54755	0.00685	0.0398223	yes
565	XLOC_004360	Nbr1	chr11:101413292-101443265	gcKO	WT	OK	107.519	168.977	0.636294	-0.652236	1.54755	0.00685	0.0398223	yes
566	XLOC_011798	Ppil2	chr16:17070225-17111369	gcKO	WT	OK	39.7001	47.8309	0.830009	-0.2688	0.331254	0.5689	0.749975	no
567	XLOC_005358	Strada	chr11:106024287-106054956	gcKO	WT	OK	33.8767	29.9228	1.13214	0.179049	-0.465856	0.4073	0.624131	no
568	XLOC_013543	Ptprs	chr17:56551649-56615903	gcKO	WT	OK	13.5598	12.2289	1.10883	0.149039	-0.407436	0.48665	0.689217	no
569	XLOC_012782	Bag6	chr17:35271694-35284410	gcKO	WT	OK	187.669	171.575	1.0938	0.129353	-0.289742	0.59435	0.76781	no
570	XLOC_012782	Bag6	chr17:35271694-35284410	gcKO	WT	OK	187.669	171.575	1.0938	0.129353	-0.289742	0.59435	0.76781	no
571	XLOC_013476	Tjap1	chr17:46394658-46419975	gcKO	WT	OK	15.1431	9.80987	1.54366	0.626354	-1.43998	0.01045	0.0547339	no
572	XLOC_014412	Osbpl1a	chr18:12913820-13100350	gcKO	WT	OK	27.1209	41.5296	0.65305	-0.614738	1.54017	0.0073	0.0417903	yes
573	XLOC_016218	Ciz1	chr2:32218484-32233932	gcKO	WT	OK	28.035	31.1464	0.900104	-0.151835	0.399521	0.47475	0.681859	no
574	XLOC_016081	Mllt10	chr2:17976863-18314457	gcKO	WT	OK	41.252	47.6756	0.865264	-0.208789	0.502244	0.38755	0.607656	no
575	XLOC_027013	Sez6l2	chr7:134094048-134114171	gcKO	WT	OK	5.00479	3.01081	1.66227	0.733159	-1.3489	0.01465	0.0700434	no
576	XLOC_002778	Cdh23	chr10:59765427-60159238	gcKO	WT	OK	13.6243	12.0981	1.12615	0.171401	-0.185542	0.6971	0.836294	no
577	XLOC_002218	Rhobtb1	chr10:68671276-68754539	gcKO	WT	OK	19.4438	19.0243	1.02205	0.0314658	-0.0728468	0.8961	0.94863	no
578	XLOC_031854	Dhx30	chr9:109986807-110020120	gcKO	WT	OK	74.0161	89.2181	0.829609	-0.269496	0.702392	0.21985	0.440156	no
579	XLOC_024572	Immt	chr6:71780963-71827668	gcKO	WT	OK	63.7018	88.5396	0.719472	-0.47499	1.30668	0.0238	0.0992127	no
580	XLOC_025242	Elmod3	chr6:72515915-72548407	gcKO	WT	OK	21.1652	20.4096	1.03702	0.0524452	-0.129042	0.81325	0.905951	no
581	XLOC_023649	Prkar1b	chr5:139493257-139606340	gcKO	WT	OK	2.58951	2.05261	1.26157	0.335214	-0.54046	0.32515	0.549759	no
582	XLOC_005337	1700023F06Rik	chr11:103032451-103079786	gcKO	WT	OK	80.7488	106.146	0.760733	-0.394537	0.9573	0.1736	0.384384	no
583	XLOC_029197	Otud4	chr8:82161970-82201657	gcKO	WT	OK	23.7193	30.1018	0.787969	-0.343789	0.91193	0.10925	0.29004	no
584	XLOC_027895	Myo7a	chr7:105198366-105268009	gcKO	WT	OK	17.642	13.1196	1.34471	0.427295	-1.11063	0.04425	0.157	no
585	XLOC_022870	Dtx2	chr5:136470669-136508751	gcKO	WT	OK	19.5029	17.0931	1.14098	0.190273	-0.489518	0.39345	0.61251	no
586	XLOC_023709	Mtif3	chr5:147760232-147775373	gcKO	WT	OK	4.7351	5.28205	0.896451	-0.157703	0.311092	0.5731	0.753324	no
587	XLOC_022914	Sun1	chr5:139676519-139725793	gcKO	WT	OK	27.4423	33.5427	0.81813	-0.289597	0.760217	0.1656	0.373083	no
588	XLOC_020729	Epha10	chr4:124559028-124595118	gcKO	WT	OK	6.2656	8.20202	0.763909	-0.388526	0.899041	0.1047	0.284793	no
589	XLOC_016509	Acp2	chr2:91024217-91077223	gcKO	WT	OK	8.81948	6.51069	1.35462	0.437883	-0.805372	0.15985	0.365586	no
590	XLOC_023673	Actb	chr5:143664794-143668547	gcKO	WT	OK	414.436	378.981	1.09355	0.129025	-0.307203	0.5851	0.761697	no
591	XLOC_029611	Adam5	chr8:25836924-25935006	gcKO	WT	OK	269.95	453.315	0.595502	-0.747821	1.77129	0.0027	0.0191485	yes
592	XLOC_001249	Prdx6	chr1:163170242-163181346	gcKO	WT	OK	32.1493	27.1961	1.18213	0.241391	-0.634858	0.25025	0.470953	no
593	XLOC_003654	Ap1b1	chr11:4838758-4942797	gcKO	WT	OK	19.3069	17.6485	1.09397	0.129572	-0.332589	0.5564	0.741316	no
594	XLOC_029171	Ap1m1	chr8:74763931-74781285	gcKO	WT	OK	86.4019	101.796	0.848775	-0.236545	0.594794	0.2771	0.500954	no
595	XLOC_027149	Ap2a2	chr7:148748078-148818999	gcKO	WT	OK	24.9611	24.3808	1.0238	0.0339374	-0.0802262	0.88285	0.941707	no
596	XLOC_002921	Ap3d1	chr10:80169722-80204956	gcKO	WT	OK	49.47	50.7056	0.975632	-0.0355918	0.0961112	0.86915	0.934394	no
597	XLOC_021104	Aqp7	chr4:40980106-40995184	gcKO	WT	OK	81.9811	114.406	0.71658	-0.480804	1.12834	0.0339	0.129516	no
598	XLOC_022722	Rplp0	chr5:116009475-116013738	gcKO	WT	OK	768.902	754.578	1.01898	0.0271291	-0.0712822	0.9121	0.957737	no
599	XLOC_027934	Art5	chr7:109245305-109248786	gcKO	WT	OK	47.3055	48.0726	0.984043	-0.0232074	0.0554599	0.9156	0.959032	no
600	XLOC_029381	Zfhx3	chr8:111238543-111485536	gcKO	WT	OK	1.72673	1.21429	1.42201	0.507926	-1.23304	0.02995	0.118015	no
601	XLOC_024599	Aup1	chr6:83004646-83007676	gcKO	WT	OK	45.605	41.4739	1.09961	0.136988	-0.393273	0.53125	0.7231	no
602	XLOC_006534	Bcap29	chr12:32280218-32319523	gcKO	WT	OK	69.8461	115.762	0.603359	-0.728915	2.19094	0.00065	0.00580036	yes
603	XLOC_031475	Cxcr5	chr9:44319869-44334504	gcKO	WT	NOTEST	0.812151	0.720421	1.12733	0.172907	0	1	1	no
604	XLOC_013007	Birc6	chr17:74927634-75102696	gcKO	WT	OK	7.57492	5.85179	1.29446	0.372352	-1.00914	0.0765	0.232452	no
605	XLOC_014395	Cetn1	chr18:9615513-9619508	gcKO	WT	OK	237.809	413.483	0.575136	-0.798022	2.00414	0.00015	0.00153046	yes
606	XLOC_021468	Cap1	chr4:122513469-122563867	gcKO	WT	OK	61.7955	55.0737	1.12205	0.166138	-0.316368	0.57995	0.758255	no
607	XLOC_031462	Cbl	chr9:43952498-44042175	gcKO	WT	OK	14.2234	13.5051	1.05319	0.0747657	-0.186021	0.73505	0.860012	no
608	XLOC_024493	Cbx3	chr6:51420614-51433703	gcKO	WT	OK	16.0213	20.8086	0.769936	-0.377186	1.16921	0.09935	0.275734	no
609	XLOC_010471	Cct5	chr15:31520382-31531559	gcKO	WT	OK	162.067	235.012	0.689612	-0.53614	1.48007	0.0136	0.0664395	no
610	XLOC_024624	Cct7	chr6:85396778-85418471	gcKO	WT	OK	199.219	246.655	0.807683	-0.308142	0.76743	0.17935	0.391695	no
611	XLOC_031161	Cdc25a	chr9:109778082-109796394	gcKO	WT	OK	17.8942	15.9131	1.12449	0.169284	-0.465576	0.43105	0.644791	no
612	XLOC_014419	Cdh2	chr18:16726358-16967558	gcKO	WT	OK	31.4054	31.7225	0.990004	-0.0144935	0.0402373	0.94665	0.973666	no
613	XLOC_024707	Chl1	chr6:103460869-103683029	gcKO	WT	OK	58.9394	106.886	0.551423	-0.858761	2.23137	0.00015	0.00153046	yes
614	XLOC_031575	Clk3	chr9:57598455-57613667	gcKO	WT	OK	18.685	22.774	0.820453	-0.285511	0.711801	0.1937	0.410369	no
615	XLOC_005028	Cpd	chr11:76590709-76660510	gcKO	WT	OK	5.42683	4.94528	1.09738	0.134057	-0.36946	0.53485	0.726043	no
616	XLOC_017239	Crat	chr2:30247935-30303419	gcKO	WT	OK	220.92	233.477	0.946217	-0.079755	0.163586	0.7874	0.890086	no
617	XLOC_004396	Crhr1	chr11:103994195-104036832	gcKO	WT	OK	1.13191	1.02392	1.10547	0.144666	-0.160257	0.79205	0.892924	no
618	XLOC_007412	Hivep1	chr13:42147389-42280419	gcKO	WT	OK	6.781	5.34212	1.26935	0.344085	-0.914199	0.10675	0.288433	no
619	XLOC_012142	Dscr3	chr16:94719330-94748236	gcKO	WT	OK	8.30108	8.84562	0.93844	-0.0916646	0.238092	0.6962	0.836012	no
620	XLOC_014489	Diap1	chr18:38003258-38095065	gcKO	WT	OK	10.4481	9.25973	1.12834	0.1742	-0.440255	0.4261	0.640436	no
621	XLOC_030617	Dnm2	chr9:21229133-21314630	gcKO	WT	OK	53.8658	58.3565	0.923047	-0.115525	0.304487	0.60475	0.775226	no
622	XLOC_014561	Slc26a2	chr18:61353655-61371277	gcKO	WT	OK	5.28565	3.55344	1.48747	0.572862	-1.28994	0.02275	0.0960632	no
623	XLOC_005969	Dtnb	chr12:3572390-3781535	gcKO	WT	OK	45.0411	49.4437	0.910957	-0.134543	0.346459	0.5326	0.724006	no
624	XLOC_002344	Eef2	chr10:80639351-80645256	gcKO	WT	OK	550.055	669.786	0.82124	-0.284124	0.617927	0.3238	0.548769	no
625	XLOC_020622	Eps15	chr4:108952866-109060424	gcKO	WT	OK	27.9738	28.2943	0.988673	-0.0164316	0.0477158	0.936	0.968103	no
626	XLOC_026260	Ercc1	chr7:19930419-19944832	gcKO	WT	OK	14.8331	23.9477	0.619396	-0.69107	1.51294	0.01565	0.073813	no
627	XLOC_005300	Ezh1	chr11:101052275-101087764	gcKO	WT	OK	8.90222	7.88425	1.12911	0.175192	-0.445499	0.4316	0.645038	no
628	XLOC_029050	Acsl1	chr8:47556300-47621404	gcKO	WT	OK	116.295	204.763	0.567949	-0.816165	1.94945	0.00085	0.00732236	yes
629	XLOC_020624	Faf1	chr4:109349231-109636565	gcKO	WT	OK	19.5034	27.9788	0.697078	-0.520605	1.51592	0.0139	0.067446	no
630	XLOC_005513	Fasn	chr11:120667271-120685861	gcKO	WT	OK	19.3434	12.8315	1.50749	0.592154	-1.54028	0.0054	0.0329723	yes
631	XLOC_010655	Foxh1	chr15:76498736-76500710	gcKO	WT	OK	5.55764	9.09346	0.611169	-0.710356	1.06068	0.12755	0.318619	no
632	XLOC_003840	Gdf9	chr11:53242369-53251404	gcKO	WT	OK	8.52194	8.73953	0.975103	-0.0363733	0.0326635	0.9531	0.975825	no
633	XLOC_007220	Gdi2	chr13:3537320-3611049	gcKO	WT	OK	61.177	74.0404	0.826265	-0.275324	0.4784	0.46055	0.670546	no
634	XLOC_022669	Golga3	chr5:110564833-110653909	gcKO	WT	OK	40.6191	54.4425	0.746092	-0.422576	1.048	0.0804	0.240177	no
635	XLOC_023438	Cmklr1	chr5:114062312-114111636	gcKO	WT	OK	6.01946	9.67539	0.622141	-0.684687	1.51486	0.00525	0.0322209	yes
636	XLOC_027567	Gpi1	chr7:34986345-35015324	gcKO	WT	OK	121.796	170.776	0.713192	-0.487637	1.28449	0.0291	0.115535	no
637	XLOC_027443	Grik5	chr7:25794866-25857852	gcKO	WT	OK	11.4055	6.8761	1.65872	0.730061	-1.72521	0.0016	0.0124549	yes
638	XLOC_017932	Gss	chr2:155388916-155418442	gcKO	WT	OK	10.3721	3.40809	3.04338	1.60567	-2.92147	5e-05	0.000597811	yes
639	XLOC_024722	Thumpd3	chr6:112996320-113027361	gcKO	WT	OK	30.2838	58.2519	0.519877	-0.94376	2.2466	0.0027	0.0191485	yes
640	XLOC_014486	Hars	chr18:36926181-36942859	gcKO	WT	OK	15.2594	14.3673	1.06209	0.0869053	-0.243531	0.7019	0.839167	no
641	XLOC_018891	Hdgf	chr3:87710227-87720354	gcKO	WT	OK	92.2975	107.99	0.854686	-0.226531	0.586431	0.28655	0.510342	no
642	XLOC_004557	Hgs	chr11:120319442-120345350	gcKO	WT	OK	59.3391	67.8623	0.874404	-0.193627	0.476012	0.39025	0.609948	no
643	XLOC_008161	Hmgcr	chr13:97418916-97440891	gcKO	WT	OK	21.6792	31.9602	0.678319	-0.559968	1.52064	0.009	0.0489245	yes
644	XLOC_010170	Hsf1	chr15:76307874-76331402	gcKO	WT	OK	6.08975	7.46014	0.816305	-0.292819	0.628383	0.25135	0.472315	no
645	XLOC_012611	Igfals	chr17:25015714-25018953	gcKO	WT	OK	1.05604	1.45496	0.725821	-0.462313	0.522518	0.3965	0.61501	no
646	XLOC_005193	Kpnb1	chr11:97021023-97049206	gcKO	WT	OK	45.0136	58.4188	0.770533	-0.376072	1.03324	0.0829	0.244447	no
647	XLOC_010606	Jrk	chr15:74532841-74540804	gcKO	WT	OK	8.01374	7.26582	1.10294	0.141349	-0.284526	0.6218	0.7872	no
648	XLOC_001329	Kcnj9	chr1:174250525-174259461	gcKO	WT	OK	16.3801	26.7965	0.611278	-0.710104	1.80719	0.00055	0.00498413	yes
649	XLOC_028986	Kcnu1	chr8:26960081-27048406	gcKO	WT	OK	15.2629	23.363	0.653294	-0.614192	1.59107	0.0034	0.0230148	yes
650	XLOC_016852	Kif3b	chr2:153117151-153159129	gcKO	WT	OK	36.736	44.8657	0.818799	-0.288416	0.736584	0.17795	0.389925	no
651	XLOC_014956	Lrp5	chr19:3584824-3686564	gcKO	WT	OK	1.89716	2.88702	0.657134	-0.605739	0.14238	0.8006	0.897919	no
652	XLOC_015379	Lrp5	chr19:3584824-3686564	gcKO	WT	OK	12.8119	13.6851	0.936193	-0.095127	0.262455	0.65455	0.80885	no
653	XLOC_007892	Mak	chr13:41120384-41175075	gcKO	WT	OK	36.0143	47.6115	0.75642	-0.402742	1.09823	0.0536	0.180608	no
654	XLOC_023149	Man2b2	chr5:37197813-37222023	gcKO	WT	OK	49.5636	44.7561	1.10742	0.147196	-0.386023	0.49555	0.696404	no
655	XLOC_013105	Mas1	chr17:12875271-13061009	gcKO	WT	OK	10.5309	15.3042	0.688105	-0.539298	0.852468	0.1112	0.292895	no
656	XLOC_023637	Mcm7	chr5:138605816-138628414	gcKO	WT	OK	67.7982	70.7498	0.958281	-0.0614789	0.125554	0.841	0.920935	no
657	XLOC_024763	Zfp239	chr6:117813094-117822784	gcKO	WT	OK	1.18174	3.4698	0.340579	-1.55394	2.30125	0.00085	0.00732236	yes
658	XLOC_021398	Mast2	chr4:115979364-116136807	gcKO	WT	OK	31.5184	29.7255	1.06032	0.0844926	-0.217667	0.6895	0.831026	no
659	XLOC_019818	Mttp	chr3:137752818-137806352	gcKO	WT	OK	4.55925	7.9928	0.57042	-0.809903	1.91272	0.001	0.00841541	yes
660	XLOC_004088	Myo1c	chr11:75465010-75488136	gcKO	WT	OK	16.4222	18.364	0.894261	-0.161233	0.433066	0.44165	0.654103	no
661	XLOC_016974	Ncoa3	chr2:165818136-165898742	gcKO	WT	OK	4.98387	5.28013	0.943892	-0.0833072	0.217001	0.70485	0.841572	no
662	XLOC_019810	Nfkb1	chr3:135247618-135354511	gcKO	WT	OK	5.53274	4.46701	1.23858	0.308686	-0.77404	0.184	0.397496	no
663	XLOC_008700	Nid2	chr14:20570478-20643045	gcKO	WT	OK	4.33816	4.88709	0.887678	-0.17189	0.231283	0.68565	0.828771	no
664	XLOC_004384	Nmt1	chr11:102889295-102930227	gcKO	WT	OK	52.5292	64.8245	0.810329	-0.303418	0.775851	0.15935	0.365092	no
665	XLOC_009450	Ints6	chr14:63282503-63449559	gcKO	WT	OK	28.0624	33.3595	0.841212	-0.249461	0.702732	0.26305	0.485762	no
666	XLOC_007491	Nsd1	chr13:55311142-55419686	gcKO	WT	OK	9.53041	8.90347	1.07042	0.0981719	-0.265925	0.63925	0.797832	no
667	XLOC_027795	Ntrk3	chr7:85336862-85722724	gcKO	WT	OK	5.96351	3.0567	1.95096	0.964189	-1.45165	0.0156	0.0737017	no
668	XLOC_005025	Nxn	chr11:76070727-76212643	gcKO	WT	OK	45.2721	59.6289	0.759231	-0.397389	0.855361	0.1163	0.301367	no
669	XLOC_027166	Slc22a18	chr7:150657245-150685237	gcKO	WT	OK	8.31547	6.99799	1.18827	0.248856	-0.496378	0.36525	0.587958	no
670	XLOC_010496	Pabpc1	chr15:36525271-36539384	gcKO	WT	OK	236.148	225.38	1.04778	0.0673331	-0.169383	0.77755	0.884604	no
671	XLOC_016771	Pcsk2	chr2:143361211-143642018	gcKO	WT	OK	1.3247	1.544	0.857966	-0.221004	0.373005	0.528	0.721188	no
672	XLOC_002907	Pcsk4	chr10:79784027-79799249	gcKO	WT	OK	34.544	39.9035	0.865688	-0.20808	0.30522	0.63695	0.796227	no
673	XLOC_010421	Pde1b	chr15:103333728-103360483	gcKO	WT	OK	2.49912	2.33077	1.07223	0.100614	-0.191481	0.73525	0.860166	no
674	XLOC_026689	Pde8a	chr7:88355846-88479423	gcKO	WT	OK	47.7816	71.8996	0.66456	-0.48195	1.37988	0.0529	0.178921	no
675	XLOC_026569	Tulp2	chr7:52769075-52777973	gcKO	WT	OK	368.811	573.981	0.642549	-0.638123	1.48262	0.0081	0.0450259	yes
676	XLOC_000730	Plxna2	chr1:196446022-196643062	gcKO	WT	OK	3.20912	3.01116	1.06574	0.0918542	-0.231036	0.68345	0.827147	no
677	XLOC_004611	Pold2	chr11:5761868-5778259	gcKO	WT	OK	20.8063	21.6135	0.962653	-0.0549091	0.0954005	0.85465	0.927544	no
678	XLOC_004087	Inpp5k	chr11:75444521-75462367	gcKO	WT	OK	30.4562	39.9271	0.762795	-0.390631	1.09007	0.06535	0.208192	no
679	XLOC_003919	Map2k3	chr11:60745558-60766305	gcKO	WT	OK	3.8958	3.72696	1.0453	0.0639213	-0.133961	0.8316	0.916098	no
680	XLOC_001418	Prox1	chr1:191945657-191994559	gcKO	WT	OK	1.02641	1.23088	0.833883	-0.262088	0.408163	0.4836	0.687573	no
681	XLOC_006207	Psen1	chr12:85029098-85077754	gcKO	WT	OK	44.3318	55.145	0.803913	-0.31489	0.780989	0.13775	0.334974	no
682	XLOC_016505	Psmc3	chr2:90894172-90899595	gcKO	WT	OK	255.882	390.825	0.654723	-0.611042	1.83482	0.00705	0.0406556	yes
683	XLOC_019609	Psmd4	chr3:94836406-94846584	gcKO	WT	OK	102.039	118.564	0.860624	-0.216543	0.551401	0.29495	0.518848	no
684	XLOC_002303	Ptbp1	chr10:79314121-79337379	gcKO	WT	OK	31.2386	33.9286	0.920716	-0.119169	0.312793	0.6063	0.776548	no
685	XLOC_020670	Ptch2	chr4:116768960-116787436	gcKO	WT	OK	5.54648	5.63062	0.985057	-0.0217234	0.0389068	0.94135	0.970925	no
686	XLOC_007546	Ptdss1	chr13:67013033-67133341	gcKO	WT	OK	11.5441	13.6725	0.84433	-0.24412	0.443107	0.4431	0.655478	no
687	XLOC_008681	Ptprg	chr14:12386026-13074553	gcKO	WT	OK	3.33252	2.86479	1.16327	0.218182	-0.55022	0.3391	0.564156	no
688	XLOC_029840	Rad23a	chr8:87339303-87364792	gcKO	WT	OK	37.57	42.0399	0.893675	-0.16218	0.328961	0.55675	0.741428	no
689	XLOC_030956	Aldh1a2	chr9:71063595-71144050	gcKO	WT	OK	27.5206	30.6646	0.897471	-0.156065	0.457297	0.4648	0.674043	no
690	XLOC_015006	Rela	chr19:5637489-5648130	gcKO	WT	OK	15.578	12.0511	1.29266	0.370338	-0.965268	0.1043	0.284197	no
691	XLOC_005511	Rfng	chr11:120642058-120645518	gcKO	WT	OK	3.2481	2.81083	1.15557	0.2086	-0.39228	0.53195	0.723308	no
692	XLOC_029222	Rfx1	chr8:86587361-86628893	gcKO	WT	OK	13.4564	15.6107	0.861999	-0.214247	0.371732	0.52145	0.716292	no
693	XLOC_013550	Rfx2	chr17:56915319-56970431	gcKO	WT	OK	57.2033	57.8393	0.989004	-0.0159507	0.0406809	0.94415	0.972209	no
694	XLOC_024573	Polr1a	chr6:71859046-71929589	gcKO	WT	OK	11.1553	13.4712	0.828085	-0.272144	0.746515	0.19745	0.412437	no
695	XLOC_025232	Polr1a	chr6:71859046-71929589	gcKO	WT	OK	3.14212	3.81529	0.82356	-0.280053	0.0797435	0.9101	0.95669	no
696	XLOC_021575	Rps6ka1	chr4:133403205-133443714	gcKO	WT	OK	12.3846	21.9234	0.564903	-0.823922	2.14023	1e-04	0.00104973	yes
697	XLOC_026793	Rrm1	chr7:109590208-109618403	gcKO	WT	OK	19.9405	24.5154	0.813387	-0.297984	0.840725	0.14925	0.351605	no
698	XLOC_023354	Mapk10	chr5:103336966-103640353	gcKO	WT	OK	5.6868	9.40994	0.60434	-0.726568	0.859064	0.12325	0.31141	no
699	XLOC_020641	Stil	chr4:114672722-114715803	gcKO	WT	OK	7.70766	7.73818	0.996056	-0.00570097	0.0157099	0.97965	0.988822	no
700	XLOC_029176	Sin3b	chr8:75247186-75282102	gcKO	WT	OK	194.994	221.463	0.880481	-0.05251	0.438166	0.82365	0.9119	no
701	XLOC_026783	Clpb	chr7:108811879-108938865	gcKO	WT	OK	94.9432	183.607	0.5171	-0.951486	2.1744	0.00025	0.00244834	yes
702	XLOC_002731	Smpd2	chr10:41206977-41210146	gcKO	WT	OK	3.91919	4.83137	0.811196	-0.301879	0.605077	0.3455	0.569523	no
703	XLOC_017921	Snta1	chr2:154202049-154233820	gcKO	WT	OK	6.67129	9.72982	0.685654	-0.544448	0.30163	0.6289	0.791108	no
704	XLOC_010117	Sqle	chr15:59146646-59163048	gcKO	WT	OK	29.9147	35.6812	0.838388	-0.254312	0.666806	0.2264	0.446718	no
705	XLOC_023062	Srpk2	chr5:22937625-23190591	gcKO	WT	OK	83.4066	123.367	0.676085	-0.564724	1.29033	0.02565	0.104957	no
706	XLOC_031773	Srprb	chr9:103090362-103104395	gcKO	WT	OK	20.7347	21.3231	0.972406	-0.0403691	0.105087	0.85255	0.926621	no
707	XLOC_014414	Ss18	chr18:14784137-14841423	gcKO	WT	OK	16.587	19.4312	0.853627	-0.228318	0.613785	0.2904	0.514156	no
708	XLOC_026792	Stim1	chr7:109416337-109585835	gcKO	WT	OK	63.6958	58.6755	1.08556	0.11844	-0.272084	0.6277	0.790486	no
709	XLOC_017266	Stxbp1	chr2:32643126-32702757	gcKO	WT	OK	7.5537	6.35928	1.18782	0.248322	-0.593753	0.272	0.495694	no
710	XLOC_023641	Taf6	chr5:138605816-138628414	gcKO	WT	OK	48.3989	41.3286	1.17108	0.227831	-0.313351	0.56445	0.746931	no
711	XLOC_010404	Tarbp2	chr15:102300937-102354107	gcKO	WT	OK	75.217	86.1496	0.873097	-0.195785	0.315872	0.56215	0.745104	no
712	XLOC_024687	Slc6a6	chr6:91634060-91709057	gcKO	WT	OK	11.0551	12.7539	0.866802	-0.206229	0.528855	0.3311	0.555928	no
713	XLOC_012478	Tcp10a	chr17:7529008-7550209	gcKO	WT	OK	34.255	62.5801	0.547378	-0.86939	2.42181	5e-05	0.000597811	yes
714	XLOC_012478	Tcp10a	chr17:7529008-7550209	gcKO	WT	OK	34.255	62.5801	0.547378	-0.86939	2.42181	5e-05	0.000597811	yes
715	XLOC_009328	Tep1	chr14:51443735-51490229	gcKO	WT	OK	4.47737	4.13677	1.08233	0.114146	-0.279577	0.6097	0.778734	no
716	XLOC_000069	Prss39	chr1:34555209-34560018	gcKO	WT	OK	120.893	145.626	0.830161	-0.268538	0.692448	0.2079	0.424969	no
717	XLOC_000807	Prss40	chr1:34592492-34617832	gcKO	WT	OK	27.117	46.3119	0.58553	-0.772185	1.97566	4e-04	0.00374925	yes
718	XLOC_007511	Tgfbi	chr13:56710963-56740719	gcKO	WT	OK	7.28873	8.0556	0.904803	-0.144325	0.348887	0.54975	0.736703	no
719	XLOC_010132	Tg	chr15:66502331-66682282	gcKO	WT	OK	4.3705	2.97872	1.46724	0.553108	-0.615515	0.24345	0.463644	no
720	XLOC_022824	Ran	chr5:129526030-129530196	gcKO	WT	OK	144.048	225.835	0.637846	-0.648721	1.86076	0.00355	0.0237739	yes
721	XLOC_004866	Top3a	chr11:60552860-60590877	gcKO	WT	OK	10.9736	12.2552	0.895424	-0.159358	0.415156	0.48005	0.685162	no
722	XLOC_025474	Tpi1	chr6:124758616-124764314	gcKO	WT	OK	157.099	231.412	0.678871	-0.558795	1.40993	0.01305	0.0649019	no
723	XLOC_013444	Crisp2	chr17:40899586-40931095	gcKO	WT	OK	661.273	1312.47	0.503839	-0.988968	2.25784	5e-04	0.00457226	yes
724	XLOC_017281	Traf1	chr2:34798777-34817292	gcKO	WT	OK	5.90311	3.05014	1.93536	0.9526	-1.67589	0.0032	0.0220835	yes
725	XLOC_011712	Ttc3	chr16:94576226-94690909	gcKO	WT	OK	6.52462	6.35708	1.02635	0.0375279	-0.0705048	0.90825	0.955292	no
726	XLOC_031012	Ttk	chr9:83728295-83765997	gcKO	WT	OK	17.5068	19.5353	0.896162	-0.158171	0.440495	0.465	0.674216	no
727	XLOC_029431	Usp10	chr8:122434751-122481457	gcKO	WT	OK	4.72977	4.93514	0.958386	-0.0613203	0.150524	0.80575	0.900487	no
728	XLOC_032585	Zfp185	chrX:70232677-70276882	gcKO	WT	OK	8.41205	9.12733	0.921633	-0.117736	0.309684	0.60325	0.773935	no
729	XLOC_021239	Zfp37	chr4:61850576-61870629	gcKO	WT	OK	30.6438	56.8003	0.539501	-0.890304	2.54878	5e-05	0.000597811	yes
730	XLOC_026322	Zfp93	chr7:25055436-25062813	gcKO	WT	OK	2.85604	3.45564	0.826487	-0.274939	0.626207	0.3116	0.536453	no
731	XLOC_033602	Zfy1	chrY:61649-133852	gcKO	WT	OK	1.43199	1.18914	1.20422	0.268101	-0.380378	0.56375	0.746437	no
732	XLOC_033605	Zfy2	chrY:1362059-1426357	gcKO	WT	OK	3.74263	4.82647	0.775438	-0.366915	0.308929	0.57295	0.753219	no
733	XLOC_016209	Abl1	chr2:31544075-31659747	gcKO	WT	OK	23.1773	26.8889	0.861965	-0.214299	0.552662	0.3158	0.540498	no
734	XLOC_004419	Ace	chr11:105829258-105851278	gcKO	WT	OK	134.53	201.591	0.667341	-0.583508	1.42542	0.01015	0.0534636	no
735	XLOC_005491	Actg1	chr11:120207003-120209798	gcKO	WT	OK	373.547	314.673	1.1871	0.247438	-0.654039	0.3002	0.524411	no
736	XLOC_025269	Actg2	chr6:83462900-83486245	gcKO	WT	OK	99.5002	119.697	0.831267	-0.266614	0.70844	0.20085	0.416283	no
737	XLOC_020457	Actl7a	chr4:56756293-56757797	gcKO	WT	OK	170.968	267.441	0.639274	-0.645494	1.93225	0.00255	0.0182548	yes
738	XLOC_029610	Adam3	chr8:25787523-25836509	gcKO	WT	OK	254.475	405.22	0.627992	-0.671179	1.59349	0.00615	0.0365393	yes
739	XLOC_005133	Akap1	chr11:88692105-88725900	gcKO	WT	OK	132.859	199.178	0.667037	-0.584165	1.24682	0.02315	0.0974247	no
740	XLOC_024841	Akap3	chr6:126803029-126824329	gcKO	WT	OK	246.496	395.287	0.623587	-0.681339	1.52225	0.00725	0.0415609	yes
741	XLOC_032368	Akap4	chrX:6644644-6655732	gcKO	WT	OK	463.736	857.476	0.540815	-0.886795	1.81521	0.0031	0.0215354	yes
742	XLOC_007626	Ap3b1	chr13:95128914-95336629	gcKO	WT	OK	36.6948	46.0708	0.796487	-0.328278	0.861881	0.1225	0.31064	no
743	XLOC_028020	Apbb1	chr7:112706978-112730167	gcKO	WT	OK	7.80169	11.0983	0.702963	-0.508483	1.07391	0.04415	0.156778	no
744	XLOC_013504	Apobec2	chr17:48549213-48572053	gcKO	WT	OK	3.0531	1.0765	2.83614	1.50392	-0.754101	0.2195	0.43977	no
745	XLOC_016594	Aqr	chr2:113926908-114001075	gcKO	WT	OK	3.88231	7.34258	0.528739	-0.91937	0.411222	0.44875	0.660143	no
746	XLOC_017698	Aqr	chr2:113926908-114001075	gcKO	WT	OK	10.5222	8.63906	1.21798	0.284495	-0.670387	0.267	0.489923	no
747	XLOC_032442	Araf	chrX:20425668-20498044	gcKO	WT	OK	7.29418	5.88226	1.24003	0.310376	-0.354702	0.55675	0.741428	no
748	XLOC_007623	Arsb	chr13:94541633-94712971	gcKO	WT	OK	5.00355	2.44001	2.05063	1.03607	-2.39025	0.00015	0.00153046	yes
749	XLOC_010798	Arsa	chr15:89302906-89308449	gcKO	WT	OK	34.6559	38.9679	0.889345	-0.169184	0.439292	0.4341	0.647118	no
750	XLOC_026620	Atp10a	chr7:65911522-66084856	gcKO	WT	OK	6.49503	7.29178	0.890733	-0.166934	0.424236	0.4605	0.670517	no
751	XLOC_012646	Axin1	chr17:26275630-26332761	gcKO	WT	OK	14.1721	15.3427	0.923703	-0.114497	0.295944	0.59915	0.77122	no
752	XLOC_017910	Bcl2l1	chr2:152606399-152657418	gcKO	WT	OK	36.4036	33.8665	1.07491	0.104221	-0.264215	0.6337	0.793942	no
753	XLOC_022859	Bcl7b	chr5:135644241-135657723	gcKO	WT	OK	17.58	23.182	0.758347	-0.399076	0.982751	0.0747	0.229061	no
754	XLOC_023008	Brca2	chr5:151325197-151372327	gcKO	WT	OK	17.0198	12.3493	1.3782	0.462794	-0.546966	0.3163	0.54117	no
755	XLOC_006286	Calm1	chr12:101437750-101448016	gcKO	WT	OK	120.126	169.921	0.706952	-0.500321	1.3388	0.02905	0.115392	no
756	XLOC_027516	Capns1	chr7:30971951-31001944	gcKO	WT	OK	175.726	171.96	1.0219	0.0312586	-0.0815026	0.88555	0.943225	no
757	XLOC_019685	Capza1	chr3:104625608-104732981	gcKO	WT	OK	58.6139	78.4382	0.747262	-0.420314	1.11988	0.06875	0.215713	no
758	XLOC_008111	Cast	chr13:74831439-74945369	gcKO	WT	OK	60.7627	84.5272	0.718854	-0.47623	1.31368	0.02395	0.0996726	no
759	XLOC_020309	Runx1t1	chr4:13670448-13820790	gcKO	WT	OK	3.73952	2.91687	1.28203	0.358432	-0.861219	0.1304	0.323457	no
760	XLOC_016870	Cbfa2t2	chr2:154262219-154365243	gcKO	WT	OK	5.78808	6.19907	0.933701	-0.0989668	0.250974	0.65025	0.805716	no
761	XLOC_006334	Ccnk	chr12:109344640-109441575	gcKO	WT	OK	88.7916	90.2454	0.983891	-0.0234299	0.0515054	0.92595	0.964099	no
762	XLOC_010850	Ccnt1	chr15:98373641-98401295	gcKO	WT	OK	8.85572	10.2328	0.865425	-0.20852	0.420822	0.48825	0.690432	no
763	XLOC_005074	Cct6b	chr11:82532655-82581124	gcKO	WT	OK	93.6138	141.352	0.662274	-0.594495	1.7156	0.01195	0.0604722	no
764	XLOC_015239	Entpd1	chr19:40686711-40816118	gcKO	WT	OK	5.886	8.69804	0.676704	-0.563402	1.18153	0.03535	0.133332	no
765	XLOC_031878	Ccr4	chr9:114399433-114409926	gcKO	WT	OK	6.3273	3.33423	1.89768	0.924237	-0.872463	0.16685	0.375058	no
766	XLOC_000611	Copa	chr1:173996087-174052463	gcKO	WT	OK	33.0805	37.0944	0.891792	-0.165222	0.330754	0.5547	0.740071	no
767	XLOC_013368	Csnk2b	chr17:35253054-35261761	gcKO	WT	OK	470.258	623.694	0.753988	-0.407386	1.10424	0.1096	0.290478	no
768	XLOC_010128	Asap1	chr15:63918258-64214481	gcKO	WT	OK	1.58507	4.1676	0.380332	-1.39467	0.21406	0.7124	0.845163	no
769	XLOC_010576	Asap1	chr15:63918258-64214481	gcKO	WT	OK	22.1342	29.2663	0.756303	-0.402965	1.14207	0.05475	0.183425	no
770	XLOC_026249	Dmwd	chr7:19661460-19668601	gcKO	WT	OK	20.8806	18.8918	1.10527	0.144406	-0.381658	0.50105	0.700449	no
771	XLOC_017256	Dnm1	chr2:32163990-32208824	gcKO	WT	OK	2.1027	2.30896	0.91067	-0.134999	0.266005	0.6497	0.805176	no
772	XLOC_029030	Adam24	chr8:41760447-41767640	gcKO	WT	OK	27.0119	45.0247	0.599935	-0.737125	2.18118	0.00035	0.00331274	yes
773	XLOC_021010	Dvl1	chr4:155221520-155237462	gcKO	WT	OK	33.888	34.0587	0.994988	-0.0072464	0.0206449	0.97345	0.985891	no
774	XLOC_031684	Eef1a1	chr9:78326260-78329531	gcKO	WT	OK	919.484	1198.51	0.767189	-0.382342	0.939549	0.16155	0.367651	no
775	XLOC_019544	Efna3	chr3:89118665-89126801	gcKO	WT	OK	5.44858	3.12837	1.74167	0.800468	-1.07474	0.05415	0.181924	no
776	XLOC_015025	Ehd1	chr19:6276895-6300242	gcKO	WT	OK	96.4088	112.754	0.855037	-0.225939	0.5607	0.31175	0.53654	no
777	XLOC_010881	Pou6f1	chr15:100405558-100416796	gcKO	WT	OK	17.944	19.0094	0.943954	-0.0832157	0.212043	0.6888	0.830681	no
778	XLOC_002668	Eya4	chr10:22823973-23069709	gcKO	WT	OK	21.4432	24.8309	0.863569	-0.211617	0.523132	0.36215	0.585255	no
779	XLOC_021392	Faah	chr4:115669260-115690507	gcKO	WT	OK	9.03046	10.171	0.887864	-0.171591	0.443937	0.4435	0.655761	no
780	XLOC_014551	Fbn2	chr18:58168270-58369580	gcKO	WT	OK	8.43013	10.6015	0.795183	-0.330647	0.894919	0.12305	0.311312	no
781	XLOC_001308	Fcgr3	chr1:172981299-173011177	gcKO	WT	OK	17.3198	11.7868	1.46942	0.555246	-1.26709	0.0241	0.100148	no
782	XLOC_009453	Fdft1	chr14:63741298-63796630	gcKO	WT	OK	75.4505	102.11	0.738914	-0.436521	0.910697	0.0934	0.264929	no
783	XLOC_012946	Fem1a	chr17:56396215-56403031	gcKO	WT	OK	3.53268	3.63912	0.970751	-0.0428281	0.10864	0.8465	0.923602	no
784	XLOC_031608	Fem1b	chr9:62639635-62659455	gcKO	WT	OK	29.4198	47.2467	0.622685	-0.683427	1.92338	0.0018	0.0137518	yes
785	XLOC_002965	Fhl4	chr10:84559763-84565240	gcKO	WT	OK	546.983	852.64	0.641517	-0.640442	1.5236	0.0211	0.0902951	no
786	XLOC_013341	Brd2	chr17:34248963-34259552	gcKO	WT	OK	73.0102	83.5683	0.873659	-0.194857	0.493712	0.3748	0.596375	no
787	XLOC_026739	Gab2	chr7:104230235-104457547	gcKO	WT	OK	8.45406	7.87347	1.07374	0.102644	-0.263477	0.6332	0.793751	no
788	XLOC_019054	Gdap2	chr3:99966394-100010962	gcKO	WT	OK	6.53998	10.7278	0.609629	-0.713994	1.71323	0.00275	0.0194427	yes
789	XLOC_016306	Gpd2	chr2:57090088-57234329	gcKO	WT	OK	144.229	239.453	0.602327	-0.731383	1.79974	0.00145	0.0115193	yes
790	XLOC_014253	Gykl1	chr18:52851758-52855247	gcKO	WT	OK	161.493	205.957	0.78411	-0.350874	0.926603	0.1031	0.28246	no
791	XLOC_023332	Gk2	chr5:97821435-98017145	gcKO	WT	OK	205.005	337.541	0.607348	-0.719405	2.09043	0.00125	0.0101127	yes
792	XLOC_002946	Gna11	chr10:80991476-81007791	gcKO	WT	OK	13.9589	11.6274	1.20052	0.263652	-0.706646	0.24715	0.467395	no
793	XLOC_023665	Gna12	chr5:141234360-141306385	gcKO	WT	OK	15.0745	11.5152	1.3091	0.388565	-0.943213	0.08595	0.250966	no
794	XLOC_004441	Gna13	chr11:109216091-109262683	gcKO	WT	OK	19.2627	20.4878	0.940203	-0.0889564	0.130078	0.8193	0.909489	no
795	XLOC_029278	Gnao1	chr8:96334737-96493288	gcKO	WT	OK	6.92273	6.29506	1.09971	0.13712	-0.203153	0.73015	0.856492	no
796	XLOC_029886	Gnao1	chr8:96334737-96493288	gcKO	WT	OK	356.181	0	#DIV/0!	#VALUE!	NA	0.1363	0.332963	no
797	XLOC_029484	Gnpat	chr8:127386932-127413957	gcKO	WT	OK	88.6809	112.798	0.786192	-0.347045	0.932581	0.1111	0.292755	no
798	XLOC_025579	Gsg1	chr6:135187347-135204410	gcKO	WT	OK	903.685	1156.07	0.781687	-0.355342	0.676174	0.2019	0.417632	no
799	XLOC_004984	Gsg2	chr11:72904096-72960951	gcKO	WT	OK	170.846	193.35	0.88361	-0.178523	0.400897	0.47635	0.683064	no
800	XLOC_022393	Htt	chr5:35103453-35255212	gcKO	WT	OK	9.58175	9.20858	1.04052	0.0573106	-0.146661	0.7862	0.88945	no
801	XLOC_026616	Herc2	chr7:63305524-63487168	gcKO	WT	OK	16.0542	15.4206	1.04109	0.108922	-0.152272	0.6075	0.777396	no
802	XLOC_030891	Hexa	chr9:59387473-59412995	gcKO	WT	OK	61.0621	58.4606	1.0445	0.0628105	-0.163954	0.76905	0.879509	no
803	XLOC_016548	Hipk3	chr2:104266633-104334646	gcKO	WT	OK	5.15603	17.4083	0.296182	-1.75545	0.66025	0.28555	0.509302	no
804	XLOC_002791	Hk1	chr10:61731500-61842691	gcKO	WT	OK	154.596	217.405	0.711097	-0.49188	1.14322	0.04325	0.154565	no
805	XLOC_001103	Htr5b	chr1:123406349-123425042	gcKO	WT	OK	1.82741	3.07369	0.594533	-0.75017	1.16662	0.0618	0.199796	no
806	XLOC_024988	Ica1	chr6:8580474-8728539	gcKO	WT	OK	45.2537	74.6679	0.606066	-0.722454	1.71256	0.0053	0.0324485	yes
807	XLOC_011691	Ifnar1	chr16:91485459-91510767	gcKO	WT	OK	7.19109	4.1948	1.71429	0.777608	-1.91113	0.00075	0.00657133	yes
808	XLOC_007686	Il6st	chr13:113254277-113297068	gcKO	WT	OK	6.02067	4.46425	1.34864	0.431505	-1.11097	0.05485	0.183564	no
809	XLOC_030615	Ilf3	chr9:21172288-21216164	gcKO	WT	OK	56.2278	54.6691	1.02851	0.0405582	-0.114311	0.85185	0.926469	no
810	XLOC_005280	Jup	chr11:100230169-100259104	gcKO	WT	OK	14.1787	9.66027	1.46773	0.553586	-1.40604	0.017	0.0775027	no
811	XLOC_013556	Khsrp	chr17:57160471-57170930	gcKO	WT	OK	21.7945	20.7414	1.05077	0.0714513	-0.199752	0.73125	0.857283	no
812	XLOC_020864	Kif17	chr4:137818155-137857932	gcKO	WT	OK	57.2605	74.4331	0.769288	-0.378404	0.994195	0.0816	0.242178	no
813	XLOC_026674	Kif7	chr7:86805081-86859276	gcKO	WT	OK	14.2159	10.4471	1.36075	0.444409	-0.510213	0.37245	0.59433	no
814	XLOC_027806	Kif7	chr7:86805081-86859276	gcKO	WT	OK	4.54701	4.88502	0.930807	-0.103447	0.156167	0.7706	0.880606	no
815	XLOC_031168	Kif9	chr9:110379461-110427678	gcKO	WT	OK	90.2024	158.472	0.569201	-0.812992	1.99495	0.00045	0.00416661	yes
816	XLOC_021197	Klf4	chr4:55540008-55545347	gcKO	WT	OK	20.5248	18.6168	1.10249	0.140767	-0.395985	0.5316	0.723263	no
817	XLOC_005372	Kpna2	chr11:106849942-106860839	gcKO	WT	OK	144.759	194.763	0.743257	-0.428065	1.20261	0.0508	0.173808	no
818	XLOC_028904	Lamp1	chr8:13159134-13176483	gcKO	WT	OK	142.799	158.132	0.903037	-0.147145	0.393543	0.5081	0.705234	no
819	XLOC_029795	Large	chr8:75338497-75876735	gcKO	WT	OK	2.25756	2.53379	0.890981	-0.166536	0.338339	0.56435	0.746877	no
820	XLOC_004158	Lig3	chr11:82594636-82684712	gcKO	WT	OK	85.6714	93.7525	0.913804	-0.130042	0.270939	0.6596	0.812014	no
821	XLOC_004582	Limk2	chr11:3243299-3309238	gcKO	WT	OK	6.53146	10.0029	0.652957	-0.614945	1.54051	0.00745	0.0425327	yes
822	XLOC_025489	Ltbr	chr6:125256588-125263888	gcKO	WT	OK	7.37335	7.49172	0.9842	-0.0229776	0.0561685	0.92305	0.962888	no
823	XLOC_025300	Mxd1	chr6:86597034-86619165	gcKO	WT	OK	16.5057	14.5674	1.13306	0.180224	-0.471808	0.39655	0.615011	no
824	XLOC_023659	Mad1l1	chr5:140484642-140797506	gcKO	WT	OK	8.6386	10.8707	0.794668	-0.331573	0.803542	0.15145	0.35499	no
825	XLOC_019661	Man1a2	chr3:100366126-100489396	gcKO	WT	OK	14.2151	16.2779	0.873276	-0.19549	0.560894	0.3526	0.575898	no
826	XLOC_012894	Mea1	chr17:46804217-46841951	gcKO	WT	OK	526.646	934.164	0.563762	-0.826842	1.18598	0.04355	0.155306	no
827	XLOC_009176	Ndst2	chr14:21542951-21553784	gcKO	WT	OK	6.59345	5.74165	1.14835	0.199569	-0.476126	0.39095	0.610434	no
828	XLOC_004073	Mnt	chr11:74644425-74659286	gcKO	WT	OK	14.403	10.9599	1.31415	0.394138	-0.918351	0.10505	0.285374	no
829	XLOC_020945	Mthfr	chr4:147413015-147449533	gcKO	WT	OK	11.3345	12.4234	0.912351	-0.132342	0.295509	0.60025	0.771662	no
830	XLOC_021700	Mthfr	chr4:147413015-147449533	gcKO	WT	OK	8.94418	14.1107	0.633858	-0.65777	0.753513	0.18925	0.404799	no
831	XLOC_000557	Myoc	chr1:164569280-164588350	gcKO	WT	OK	1.00346	1.18138	0.849396	-0.235484	0.236013	0.6807	0.826048	no
832	XLOC_006469	Ncoa1	chr12:4247359-4484060	gcKO	WT	OK	6.16484	3.90891	1.57713	0.657297	-1.68419	0.0035	0.0235584	yes
833	XLOC_000720	Nek2	chr1:193645091-193656930	gcKO	WT	OK	53.7661	89.0343	0.603881	-0.727664	1.9605	9e-04	0.00770815	yes
834	XLOC_004133	Nf1	chr11:79153349-79395111	gcKO	WT	OK	13.6663	13.545	1.00896	0.0128649	-0.0356579	0.9522	0.975341	no
835	XLOC_004599	Nf2	chr11:4665847-4749547	gcKO	WT	OK	35.2843	47.839	0.737563	-0.43916	0.980996	0.09045	0.259254	no
836	XLOC_031233	Nktr	chr9:121628257-121669061	gcKO	WT	OK	17.6041	21.6856	0.811788	-0.300827	0.787916	0.15795	0.363476	no
837	XLOC_021033	Nsmaf	chr4:6323353-6381418	gcKO	WT	OK	13.1494	15.7566	0.834533	-0.260961	0.713298	0.22425	0.44446	no
838	XLOC_014213	Pabpc2	chr18:39933150-39936720	gcKO	WT	OK	241.624	299.644	0.80637	-0.31049	0.780708	0.1861	0.40062	no
839	XLOC_032440	Cdk16	chrX:20265094-20277005	gcKO	WT	OK	44.0611	37.1753	1.18523	0.245161	-0.645284	0.2432	0.463604	no
840	XLOC_026935	Pde3b	chr7:121558767-121681451	gcKO	WT	OK	10.6317	15.6202	0.680638	-0.555045	1.61581	0.0094	0.0505952	no
841	XLOC_023019	Cdk14	chr5:4803384-5380251	gcKO	WT	OK	2.58974	2.89733	0.893837	-0.161918	0.359934	0.52985	0.722575	no
842	XLOC_008752	Prkcd	chr14:31408539-31439394	gcKO	WT	OK	3.07623	6.37999	0.482168	-1.05239	0.397175	0.47815	0.68396	no
843	XLOC_009217	Prkcd	chr14:31408539-31439394	gcKO	WT	OK	57.0601	94.0582	0.606647	-0.721072	1.97544	0.0015	0.011864	yes
844	XLOC_029597	Polb	chr8:23738590-23763926	gcKO	WT	OK	92.9059	141.263	0.65768	-0.60454	2.06028	0.00485	0.0303442	yes
845	XLOC_022671	Pole	chr5:110715298-110766565	gcKO	WT	OK	9.26035	7.51737	1.23186	0.300838	-0.788819	0.16695	0.375216	no
846	XLOC_001279	Pou2f1	chr1:167718811-167932809	gcKO	WT	OK	4.42829	3.34653	1.32325	0.404083	-0.921816	0.09895	0.274928	no
847	XLOC_033402	Ppef1	chrX:157061026-157189224	gcKO	WT	OK	7.8949	12.8531	0.614241	-0.703121	1.77282	0.00295	0.0206303	yes
848	XLOC_006147	Psma3	chr12:72075607-72200338	gcKO	WT	OK	42.0716	58.0735	0.724454	-0.465033	1.28277	0.0781	0.235717	no
849	XLOC_022293	Psmc2	chr5:21291100-21309602	gcKO	WT	OK	134.594	211.501	0.636375	-0.652046	1.97194	0.0018	0.0137518	yes
850	XLOC_021426	Ptprf	chr4:117880817-117964002	gcKO	WT	OK	5.12089	2.91926	1.75417	0.810791	-2.06785	0.00055	0.00498413	yes
851	XLOC_022721	Pxn	chr5:115956710-116005998	gcKO	WT	OK	39.125	25.8683	1.51247	0.596905	-1.45858	0.007	0.0404509	yes
852	XLOC_031036	Rasgrf1	chr9:89804612-89921817	gcKO	WT	OK	3.48422	2.00453	1.73817	0.797572	-1.35044	0.02215	0.093972	no
853	XLOC_023538	Pitpnm2	chr5:124568658-124699457	gcKO	WT	OK	17.3991	22.8035	0.763001	-0.390249	0.742325	0.24325	0.463604	no
854	XLOC_023211	Rfc1	chr5:65653090-65726878	gcKO	WT	OK	22.687	32.5219	0.697591	-0.519544	1.53873	0.0141	0.0681008	no
855	XLOC_002095	Rev3l	chr10:39451888-39595011	gcKO	WT	OK	10.6136	12.1813	0.871303	-0.198754	0.466448	0.41385	0.629292	no
856	XLOC_016161	Rxra	chr2:27532720-27618839	gcKO	WT	OK	6.92833	8.04828	0.860846	-0.216172	0.552671	0.32085	0.545795	no
857	XLOC_004882	Ncor1	chr11:62094974-62271025	gcKO	WT	OK	12.3479	10.5005	1.17593	0.233811	-0.586975	0.3094	0.53413	no
858	XLOC_009501	Sorbs3	chr14:70580273-70612415	gcKO	WT	OK	52.8046	47.3377	1.11549	0.157674	-0.396895	0.4664	0.675305	no
859	XLOC_007576	Slc12a7	chr13:73901144-73954299	gcKO	WT	OK	6.85188	4.63851	1.47717	0.56284	-1.37994	0.0134	0.0656412	no
860	XLOC_003118	Slc16a7	chr10:124663979-124765591	gcKO	WT	OK	106.503	157.588	0.675832	-0.565256	1.47338	0.0089	0.0485384	yes
861	XLOC_004793	Slc22a5	chr11:53678043-53705205	gcKO	WT	OK	14.3386	10.6973	1.34039	0.422656	-1.03608	0.06345	0.203793	no
862	XLOC_025452	Slc2a3	chr6:122677650-122752495	gcKO	WT	OK	267.155	290.547	0.91949	-0.121098	0.251721	0.652	0.807031	no
863	XLOC_022454	Slc34a2	chr5:53440591-53462902	gcKO	WT	OK	17.7789	17.6072	1.00975	0.0140022	-0.0363864	0.9475	0.974023	no
864	XLOC_030620	Smarca4	chr9:21420612-21508674	gcKO	WT	OK	27.9359	33.9872	0.821954	-0.282869	0.762676	0.18275	0.395885	no
865	XLOC_002848	Smarcb1	chr10:75356137-75384823	gcKO	WT	OK	28.8346	39.2157	0.735282	-0.44363	0.976545	0.09265	0.263456	no
866	XLOC_028112	Sox6	chr7:122614386-123182377	gcKO	WT	OK	11.4612	12.0491	0.951208	-0.0721636	0.194693	0.7335	0.859039	no
867	XLOC_017078	Srms	chr2:180940267-180949626	gcKO	WT	OK	3.46129	3.47425	0.99627	-0.00539271	0.00643677	0.9909	0.994701	no
868	XLOC_018108	Srms	chr2:180940267-180949626	gcKO	WT	OK	3.45653	2.84777	1.21377	0.279494	-0.480657	0.4114	0.627162	no
869	XLOC_000141	Stat4	chr1:52043935-52164035	gcKO	WT	OK	108.097	164.582	0.656797	-0.606482	1.61246	0.0063	0.0372192	yes
870	XLOC_018768	Plk4	chr3:40603755-40620805	gcKO	WT	OK	16.7134	23.4876	0.711584	-0.490895	1.37884	0.02075	0.0891313	no
871	XLOC_018055	Aurka	chr2:172181690-172206808	gcKO	WT	OK	45.8742	55.0964	0.832617	-0.264274	0.519957	0.41765	0.632505	no
872	XLOC_028864	Stxbp2	chr8:3631159-3643644	gcKO	WT	OK	19.8811	24.9424	0.79708	-0.3272	0.638522	0.237	0.457078	no
873	XLOC_017209	Surf4	chr2:26768897-26821051	gcKO	WT	OK	56.0625	51.3732	1.09128	0.126021	-0.233598	0.6969	0.836253	no
874	XLOC_014557	Tcof1	chr18:60973409-61008618	gcKO	WT	OK	3.64189	2.8366	1.28389	0.360525	-0.805527	0.14765	0.34954	no
875	XLOC_012478	Tcp10a	chr17:7529008-7550209	gcKO	WT	OK	34.255	62.5801	0.547378	-0.86939	2.42181	5e-05	0.000597811	yes
876	XLOC_004979	Tekt1	chr11:72158221-72175382	gcKO	WT	OK	145.128	248.612	0.583753	-0.776569	2.46947	0.00025	0.00244834	yes
877	XLOC_020390	Tesk1	chr4:43455148-43467498	gcKO	WT	OK	264.118	266.969	0.989321	-0.0154915	0.0330775	0.9547	0.976627	no
878	XLOC_029371	Cirh1a	chr8:109417539-109446994	gcKO	WT	OK	13.5242	12.2857	1.10081	0.138558	-0.333615	0.55645	0.741343	no
879	XLOC_002889	Theg	chr10:79039120-79049881	gcKO	WT	OK	94.5536	153.376	0.616482	-0.697865	1.83605	0.0011	0.00909546	yes
880	XLOC_004107	Myo18a	chr11:77590766-77679513	gcKO	WT	OK	7.18935	7.08106	1.01529	0.0218976	-0.0565397	0.92065	0.96169	no
881	XLOC_000599	Dedd	chr1:173259275-173291055	gcKO	WT	OK	40.296	47.5792	0.846925	-0.239695	0.53486	0.36495	0.587663	no
882	XLOC_011418	Top3b	chr16:16870681-16893084	gcKO	WT	OK	36.5247	34.1187	1.07052	0.0983098	-0.175504	0.7564	0.872115	no
883	XLOC_006825	Ppp1r13b	chr12:113066665-113151743	gcKO	WT	OK	9.34929	11.7191	0.797782	-0.325936	0.76239	0.20475	0.421066	no
884	XLOC_002422	Nr2c1	chr10:93610675-93659959	gcKO	WT	OK	8.57507	7.41891	1.15584	0.20894	-0.55424	0.35655	0.579655	no
885	XLOC_024691	Nr2c2	chr6:92041411-92134017	gcKO	WT	OK	7.68099	9.18112	0.836607	-0.257378	0.503142	0.37825	0.599284	no
886	XLOC_026789	Trpc2	chr7:109167540-109244930	gcKO	WT	OK	9.015	10.1116	0.89155	-0.165609	0.299202	0.596	0.768874	no
887	XLOC_003932	Ubb	chr11:62365005-62366714	gcKO	WT	OK	881.474	1358	0.649097	-0.623492	1.74006	0.01455	0.0696714	no
888	XLOC_031137	Usp4	chr9:108250120-108294861	gcKO	WT	OK	46.519	62.5368	0.743866	-0.426886	1.12289	0.04335	0.154835	no
889	XLOC_008712	Vdac2	chr14:22650453-22668132	gcKO	WT	OK	183.078	253.153	0.723191	-0.467556	1.46588	0.0338	0.129232	no
890	XLOC_006809	Wars	chr12:110098168-110132384	gcKO	WT	OK	11.4354	14.5582	0.785495	-0.348319	0.805082	0.14445	0.345086	no
891	XLOC_023160	Wdr1	chr5:38918051-38953005	gcKO	WT	OK	34.5474	38.5746	0.8956	-0.159075	0.431026	0.43435	0.647299	no
892	XLOC_010497	Ywhaz	chr15:36700015-36726807	gcKO	WT	OK	52.0912	73.96	0.704316	-0.505705	1.20833	0.04335	0.154835	no
893	XLOC_013170	Zfp13	chr17:23711899-23736503	gcKO	WT	OK	14.2141	22.3112	0.637084	-0.650452	1.63991	0.0042	0.0273113	yes
894	XLOC_014124	Zfp35	chr18:24148134-24163872	gcKO	WT	OK	38.2392	52.7438	0.724999	-0.463947	1.32468	0.02825	0.112982	no
895	XLOC_022898	Zscan21	chr5:138558132-138575487	gcKO	WT	OK	44.0788	67.2117	0.65582	-0.608627	1.66597	0.00345	0.023303	yes
896	XLOC_004837	Zfp39	chr11:58701632-58717727	gcKO	WT	OK	16.6663	34.336	0.485389	-1.04279	2.97165	5e-05	0.000597811	yes
897	XLOC_012562	Zfp54	chr17:21560188-21572348	gcKO	WT	OK	3.85861	5.18166	0.744667	-0.425333	0.986694	0.1331	0.328049	no
898	XLOC_013154	Zfp54	chr17:21560188-21572348	gcKO	WT	OK	2.67789	0.677644	3.95177	1.9825	-0.358339	0.5409	0.73027	no
899	XLOC_026385	Zfp59	chr7:28516427-28641793	gcKO	WT	OK	4.156	5.86324	0.708823	-0.4965	0.865191	0.16375	0.370744	no
900	XLOC_010080	Zfpm2	chr15:40486587-40936138	gcKO	WT	OK	8.94747	4.58014	1.95354	0.966088	-0.744861	0.2108	0.428699	no
901	XLOC_010024	Zfr	chr15:12047533-12115205	gcKO	WT	OK	28.3479	34.7925	0.81477	-0.295532	0.888077	0.15495	0.359023	no
902	XLOC_023108	Slc30a3	chr5:31388476-31410621	gcKO	WT	OK	49.5781	36.5667	1.35583	0.439172	-1.07807	0.05325	0.17979	no
903	XLOC_031835	Arih2	chr9:108505273-108587093	gcKO	WT	OK	36.3947	47.8474	0.760641	-0.394712	0.997582	0.0936	0.265256	no
904	XLOC_023031	Dmtf1	chr5:9100736-9161776	gcKO	WT	OK	7.13715	8.02087	0.889822	-0.168411	0.357145	0.5477	0.735419	no
905	XLOC_000984	Farsb	chr1:78421410-78485421	gcKO	WT	OK	21.6296	27.0988	0.798176	-0.325225	0.950374	0.13245	0.326896	no
906	XLOC_024658	Mgll	chr6:88674405-88778354	gcKO	WT	OK	30.4306	37.6023	0.809275	-0.305298	0.779261	0.16645	0.37446	no
907	XLOC_008758	Nek4	chr14:31764444-31802006	gcKO	WT	OK	21.5877	36.9393	0.58441	-0.774944	2.07214	0.00055	0.00498413	yes
908	XLOC_012489	Pde10a	chr17:8994609-9179513	gcKO	WT	OK	8.5001	9.18817	0.925113	-0.112298	0.301243	0.594	0.767714	no
909	XLOC_005218	Med24	chr11:98565903-98590749	gcKO	WT	OK	43.1109	45.9835	0.93753	-0.0930655	0.235502	0.66695	0.816899	no
910	XLOC_015494	Best1	chr19:10059661-10110210	gcKO	WT	OK	61.4976	84.8521	0.724762	-0.46442	0.614686	0.3289	0.55364	no
911	XLOC_004424	Map3k3	chr11:105946186-106022831	gcKO	WT	OK	11.3642	8.97721	1.26589	0.340163	-0.242503	0.68165	0.826242	no
912	XLOC_027005	Mapk3	chr7:133903139-133909330	gcKO	WT	OK	49.5861	45.7359	1.08418	0.116609	-0.345788	0.58805	0.763833	no
913	XLOC_013214	Nubp2	chr17:25019475-25023295	gcKO	WT	OK	89.7687	102.421	0.876468	-0.190228	0.513224	0.37975	0.600713	no
914	XLOC_023057	Orc5	chr5:21992306-22056149	gcKO	WT	OK	12.2008	12.3893	0.984785	-0.0221155	0.0594389	0.92715	0.964202	no
915	XLOC_006410	Stk30	chr12:112045875-112082136	gcKO	WT	OK	8.28563	9.70264	0.853956	-0.227765	0.214613	0.7091	0.843559	no
916	XLOC_006816	Stk30	chr12:112045875-112082136	gcKO	WT	OK	49.2599	64.9218	0.758757	-0.398289	1.11287	0.0851	0.249209	no
917	XLOC_004858	Cops3	chr11:59623581-59690216	gcKO	WT	OK	66.9047	96.8662	0.690692	-0.533886	1.28238	0.06675	0.211312	no
918	XLOC_022610	Cops4	chr5:100947327-100976821	gcKO	WT	OK	92.3702	143.735	0.642642	-0.637915	1.9571	0.00325	0.0223365	yes
919	XLOC_025482	Cops7a	chr6:124908428-124915547	gcKO	WT	OK	90.9781	117.962	0.771249	-0.374729	0.968492	0.08845	0.255563	no
920	XLOC_000649	Exo1	chr1:177810908-177841569	gcKO	WT	OK	3.44199	3.21347	1.07111	0.099111	-0.232797	0.6787	0.824576	no
921	XLOC_007489	Zfp346	chr13:55206659-55236432	gcKO	WT	OK	10.0656	12.229	0.823093	-0.280872	0.699919	0.19255	0.409071	no
922	XLOC_006646	Ppp2r5e	chr12:76551755-76697187	gcKO	WT	OK	14.5323	22.0205	0.659944	-0.599585	1.65464	0.004	0.0262418	yes
923	XLOC_001317	Nit1	chr1:173259275-173291055	gcKO	WT	OK	28.3972	38.5337	0.736945	-0.440376	0.697371	0.3122	0.536837	no
924	XLOC_024983	Asns	chr6:7625164-7682357	gcKO	WT	OK	58.604	93.7016	0.625432	-0.677075	2.06691	0.00125	0.0101127	yes
925	XLOC_010309	Acr	chr15:89397465-89405019	gcKO	WT	OK	74.303	72.3366	1.02718	0.0386933	-0.0955275	0.85865	0.92931	no
926	XLOC_010645	Bop1	chr15:76210923-76307699	gcKO	WT	OK	24.6305	20.5618	1.19788	0.26048	-0.34576	0.5714	0.751811	no
927	XLOC_028095	Eif4g2	chr7:118211338-118226711	gcKO	WT	OK	106.111	123.35	0.860243	-0.21719	0.517406	0.358	0.581128	no
928	XLOC_002068	Epb4.1l2	chr10:25079603-25243406	gcKO	WT	OK	49.307	72.9709	0.675708	-0.565528	1.47832	0.0091	0.04934	yes
929	XLOC_012769	Hspa1l	chr17:35109647-35116173	gcKO	WT	OK	263.919	397.438	0.664051	-0.590638	1.60496	0.0135	0.0660538	no
930	XLOC_026595	Ldhc	chr7:54116555-54134204	gcKO	WT	OK	1782.08	2668.59	0.667798	-0.582515	1.06604	0.0641	0.20512	no
931	XLOC_004454	Cog1	chr11:113510590-113555962	gcKO	WT	OK	27.6807	28.7686	0.962184	-0.0556136	0.061889	0.9158	0.959057	no
932	XLOC_018920	Muc1	chr3:89032040-89037296	gcKO	WT	OK	2.97778	5.8122	0.512333	-0.964847	1.7725	0.00185	0.0140526	yes
933	XLOC_012601	Pkd1	chr17:24686859-24769574	gcKO	WT	OK	8.64786	5.21329	1.65881	0.730151	-1.5362	0.0076	0.043144	yes
934	XLOC_011543	Sema5b	chr16:35541447-35664349	gcKO	WT	OK	15.0838	9.86431	1.52913	0.612707	-1.59549	0.00555	0.0337161	yes
935	XLOC_012518	Tbp	chr17:15612678-15654461	gcKO	WT	OK	37.2586	42.1066	0.884864	-0.176472	0.327569	0.57025	0.750769	no
936	XLOC_012877	Tcte1	chr17:45660382-45686626	gcKO	WT	OK	39.8286	45.3381	0.87848	-0.186919	0.431107	0.44205	0.654464	no
937	XLOC_012942	Chaf1a	chr17:56179825-56249225	gcKO	WT	OK	25.0972	24.9567	1.00563	0.00810328	-0.00747164	0.98985	0.994164	no
938	XLOC_001327	Atp1a4	chr1:174153336-174188555	gcKO	WT	OK	155.78	218.467	0.71306	-0.487902	1.14758	0.0353	0.133204	no
939	XLOC_017746	Trp53bp1	chr2:120996941-121181011	gcKO	WT	OK	12.371	14.7967	0.836065	-0.258304	0.430952	0.42995	0.64387	no
940	XLOC_021605	Tceb3	chr4:135559284-135577564	gcKO	WT	OK	16.012	16.6554	0.96137	-0.0568398	0.157764	0.7893	0.891391	no
941	XLOC_028339	Cars	chr7:150743134-150785995	gcKO	WT	OK	7.31974	10.3423	0.707748	-0.498696	1.21786	0.0329	0.126426	no
942	XLOC_004763	Zfp354b	chr11:50735283-50745137	gcKO	WT	OK	1.95	2.66996	0.730348	-0.453345	0.772015	0.20655	0.423311	no
943	XLOC_005010	Srr	chr11:74711581-74977952	gcKO	WT	OK	15.6658	18.2102	0.860276	-0.21713	0.23852	0.68145	0.82622	no
944	XLOC_010715	Rpl3	chr15:79908210-79913836	gcKO	WT	OK	122.787	148.933	0.824445	-0.278507	0.766165	0.26695	0.489923	no
945	XLOC_009364	Prmt5	chr14:55126018-55136307	gcKO	WT	OK	14.9323	17.081	0.874205	-0.193955	0.529948	0.3712	0.593278	no
946	XLOC_004559	Slc25a10	chr11:120353150-120362475	gcKO	WT	OK	8.56709	7.67857	1.11571	0.157968	-0.40524	0.488	0.690312	no
947	XLOC_027135	Ptdss2	chr7:148317184-148342206	gcKO	WT	OK	127.849	152.753	0.836966	-0.256766	0.63478	0.24625	0.466501	no
948	XLOC_020992	Mmel1	chr4:154243677-154269774	gcKO	WT	OK	40.6676	59.6146	0.682175	-0.551785	1.12412	0.0466	0.163035	no
949	XLOC_010436	Skp2	chr15:9041741-9128866	gcKO	WT	OK	29.2361	48.5729	0.601901	-0.732399	1.74415	0.0041	0.026786	yes
950	XLOC_004341	Naglu	chr11:100931407-100938985	gcKO	WT	OK	14.9425	17.9941	0.830411	-0.268105	0.756615	0.2195	0.43977	no
951	XLOC_011928	Casr	chr16:36493781-36562220	gcKO	WT	NOTEST	0.73595	0.782581	0.940414	-0.0886309	0	1	1	no
952	XLOC_012695	Dnahc8	chr17:30763880-31017659	gcKO	WT	OK	189.08	160.807	1.17582	0.233666	-0.394885	0.48485	0.688142	no
953	XLOC_012983	Epb4.1l3	chr17:69425026-69639331	gcKO	WT	OK	25.3769	30.5168	0.831571	-0.266084	0.766169	0.2044	0.420587	no
954	XLOC_016756	Plcb4	chr2:135567565-135839029	gcKO	WT	OK	7.77446	6.83518	1.13742	0.185762	-0.478765	0.4258	0.640178	no
955	XLOC_011459	Abcf3	chr16:20548649-20562559	gcKO	WT	OK	30.0536	35.1207	0.855723	-0.224785	0.595736	0.2683	0.49159	no
956	XLOC_023075	Abcf2	chr5:24071158-24083285	gcKO	WT	OK	110.502	120.505	0.916991	-0.125014	0.316637	0.56985	0.750466	no
957	XLOC_031253	Limd1	chr9:123387818-123430890	gcKO	WT	OK	8.52543	10.9891	0.775808	-0.366236	0.792568	0.14505	0.345895	no
958	XLOC_017951	Ndrg3	chr2:156748968-156817847	gcKO	WT	OK	53.6435	61.3939	0.873759	-0.19469	0.444759	0.42375	0.638242	no
959	XLOC_004879	Ulk2	chr11:61589099-61668745	gcKO	WT	OK	45.056	42.8883	1.05054	0.0711344	-0.181321	0.75085	0.868506	no
960	XLOC_020698	Scmh1	chr4:120077858-120203406	gcKO	WT	OK	9.7686	12.862	0.759493	-0.396892	0.968918	0.07665	0.232739	no
961	XLOC_021596	Clic4	chr4:134769884-134828675	gcKO	WT	OK	19.2708	19.9153	0.967638	-0.047457	0.133044	0.81975	0.909827	no
962	XLOC_016130	Fbxw5	chr2:25354169-25361015	gcKO	WT	OK	116.704	138.149	0.844769	-0.243365	0.589394	0.2857	0.509353	no
963	XLOC_022780	Kdm2b	chr5:123320619-123439101	gcKO	WT	OK	114.312	13.2153	8.64997	3.11269	-4.17553	0.00855	0.0469969	yes
964	XLOC_023522	Kdm2b	chr5:123320619-123439101	gcKO	WT	OK	17.4356	20.1185	0.866645	-0.206488	0.539747	0.354	0.577434	no
965	XLOC_030027	Snai3	chr8:124978105-124984592	gcKO	WT	NOTEST	0.765795	1.07096	0.715055	-0.483875	0	1	1	no
966	XLOC_011649	Usp25	chr16:77013509-77117096	gcKO	WT	OK	20.2041	31.4374	0.642677	-0.637836	1.79418	0.0024	0.0172894	yes
967	XLOC_020318	Cngb3	chr4:19207996-19437770	gcKO	WT	OK	2.82052	4.14254	0.680867	-0.554552	1.02537	0.1013	0.278989	no
968	XLOC_031386	Ddx25	chr9:35349101-35366055	gcKO	WT	OK	235.482	350.448	0.671946	-0.573585	1.46448	0.00915	0.0495469	yes
969	XLOC_018038	Atp9a	chr2:168459935-168567300	gcKO	WT	OK	19.175	32.2564	0.594456	-0.750358	1.91385	0.00025	0.00244834	yes
970	XLOC_015073	Ddb1	chr19:10666486-10704311	gcKO	WT	OK	92.8838	98.9901	0.938314	-0.0918571	0.169443	0.75915	0.873722	no
971	XLOC_006498	Lpin1	chr12:16542474-16617804	gcKO	WT	OK	106.94	180.237	0.59333	-0.753085	1.63894	0.0026	0.0185493	yes
972	XLOC_011395	Ercc4	chr16:13109828-13152102	gcKO	WT	OK	6.06574	5.78851	1.04789	0.067493	-0.173321	0.7623	0.875542	no
973	XLOC_009422	Lats2	chr14:58308497-58364981	gcKO	WT	OK	11.9723	11.3528	1.05457	0.076656	-0.158235	0.7807	0.886221	no
974	XLOC_011794	Spag6	chr16:16753108-16829456	gcKO	WT	OK	90.8674	127.826	0.710868	-0.492345	1.4153	0.022	0.0934619	no
975	XLOC_027656	Dkkl1	chr7:52462886-52467876	gcKO	WT	OK	778.849	934.517	0.833424	-0.262877	0.596506	0.27705	0.500899	no
976	XLOC_009435	Atp8a2	chr14:60266361-60816051	gcKO	WT	OK	67.7525	108.535	0.624246	-0.679816	0.505408	0.375	0.59658	no
977	XLOC_028897	Atp11a	chr8:12757015-12868728	gcKO	WT	OK	17.0014	23.0312	0.73819	-0.437934	1.12226	0.0599	0.195516	no
978	XLOC_014643	Atp9b	chr18:80930842-81130897	gcKO	WT	OK	34.7457	37.3009	0.931498	-0.102375	0.252384	0.6522	0.807137	no
979	XLOC_021084	Orc3	chr4:34497863-34562191	gcKO	WT	OK	4.43725	5.11599	0.86733	-0.205347	0.35933	0.55055	0.736883	no
980	XLOC_012703	Pknox1	chr17:31701717-31744752	gcKO	WT	OK	14.2691	18.9075	0.754679	-0.406066	1.09858	0.05735	0.189782	no
981	XLOC_022962	Zkscan5	chr5:145965427-145982619	gcKO	WT	OK	11.5254	14.4788	0.796019	-0.329123	0.843779	0.1308	0.324129	no
982	XLOC_029128	Comp	chr8:72897446-72906028	gcKO	WT	OK	75.0455	115.433	0.650122	-0.621212	1.5921	0.0054	0.0329723	yes
983	XLOC_012493	Park2	chr17:10595877-12256279	gcKO	WT	OK	6.66184	8.43472	0.789812	-0.34042	0.255222	0.6515	0.806588	no
984	XLOC_023463	Rnf10	chr5:115691766-115722914	gcKO	WT	OK	80.7134	78.689	1.02573	0.0366468	-0.0896642	0.86295	0.93125	no
985	XLOC_020950	Exosc10	chr4:147932535-147956509	gcKO	WT	OK	36.5501	38.6384	0.945953	-0.0801615	0.228104	0.70525	0.841769	no
986	XLOC_004223	Coil	chr11:88835248-88852927	gcKO	WT	OK	96.1303	114.338	0.840755	-0.250237	0.694746	0.24765	0.468023	no
987	XLOC_010269	Nup50	chr15:84753857-84773393	gcKO	WT	OK	25.5555	27.8466	0.917724	-0.123866	0.328133	0.55285	0.738662	no
988	XLOC_027824	Iqgap1	chr7:87856468-87960680	gcKO	WT	OK	17.617	21.9566	0.802356	-0.317684	0.87387	0.12935	0.321707	no
989	XLOC_022313	Nub1	chr5:24191632-24216373	gcKO	WT	OK	29.7672	40.5917	0.733332	-0.447462	1.16213	0.0386	0.142384	no
990	XLOC_010819	Nell2	chr15:95049864-95417510	gcKO	WT	OK	11.5613	11.6676	0.990889	-0.0131977	0.0338249	0.9516	0.975084	no
991	XLOC_017087	Dnajc5	chr2:181255097-181288331	gcKO	WT	OK	9.17516	8.4161	1.09019	0.124582	-0.312553	0.57775	0.756717	no
992	XLOC_010860	Prkag1	chr15:98643227-98661939	gcKO	WT	OK	9.82882	13.7025	0.717301	-0.47935	1.2088	0.04935	0.170261	no
993	XLOC_013274	Srpk1	chr17:28726365-28759399	gcKO	WT	OK	120.036	165.927	0.723427	-0.467073	1.1812	0.04415	0.156778	no
994	XLOC_003165	Dgka	chr10:128143313-128181903	gcKO	WT	OK	48.0777	56.6766	0.848281	-0.237386	0.604589	0.285	0.508808	no
995	XLOC_010274	Atxn10	chr15:85166810-85294266	gcKO	WT	OK	45.5456	54.4614	0.836291	-0.257921	0.760412	0.22	0.44028	no
996	XLOC_001205	Rgl1	chr1:154364196-154613439	gcKO	WT	OK	23.9346	23.8186	1.00487	0.00700616	-0.0167763	0.9758	0.986879	no
997	XLOC_005440	Wbp2	chr11:115939868-115948426	gcKO	WT	OK	53.8614	42.8245	1.25772	0.330817	-0.802079	0.14105	0.339873	no
998	XLOC_005449	Exoc7	chr11:116149311-116168052	gcKO	WT	OK	17.8021	18.991	0.937397	-0.093269	0.238833	0.6667	0.816832	no
999	XLOC_013495	Bysl	chr17:47641999-47748476	gcKO	WT	OK	12.8365	12.7988	1.00295	0.00424578	-0.00709686	0.9895	0.994051	no
1000	XLOC_015708	Actr1a	chr19:46451303-46470225	gcKO	WT	OK	71.9226	96.0744	0.748614	-0.417707	1.1676	0.0496	0.170866	no
1001	XLOC_017375	Stk39	chr2:68048499-68310038	gcKO	WT	OK	45.9423	49.3269	0.931384	-0.102551	0.285973	0.62995	0.791692	no
1002	XLOC_003999	Ybx2	chr11:69749284-69755251	gcKO	WT	OK	788.807	955.472	0.825568	-0.276541	0.577727	0.3176	0.54247	no
1003	XLOC_031320	Eif3g	chr9:20698792-20703034	gcKO	WT	OK	117.349	167.287	0.701483	-0.511516	1.67368	0.015	0.0714177	no
1004	XLOC_011377	Pmm2	chr16:8633823-8658045	gcKO	WT	OK	19.3516	28.1051	0.688544	-0.538378	1.16142	0.03935	0.144662	no
1005	XLOC_006179	Fut8	chr12:78339090-78576989	gcKO	WT	OK	16.4454	20.0353	0.820821	-0.284863	0.745544	0.20945	0.426989	no
1006	XLOC_025321	Sec61a1	chr6:88453600-88468794	gcKO	WT	OK	89.326	84.6444	1.05531	0.0776665	-0.211725	0.7227	0.852071	no
1007	XLOC_010699	Pla2g6	chr15:79116571-79158966	gcKO	WT	OK	84.8521	105.889	0.801331	-0.319528	0.797534	0.1505	0.353522	no
1008	XLOC_030039	Fanca	chr8:125778094-125842476	gcKO	WT	OK	5.92125	5.18044	1.143	0.192826	-0.366317	0.5005	0.700101	no
1009	XLOC_014154	Pkd2l2	chr18:34569076-34667832	gcKO	WT	OK	9.45289	15.3806	0.614598	-0.70228	0.810543	0.18865	0.404066	no
1010	XLOC_022906	Stag3	chr5:138721401-138754133	gcKO	WT	OK	77.7558	107.455	0.723613	-0.466704	1.10436	0.03825	0.141383	no
1011	XLOC_017422	Nckap1	chr2:80340669-80421144	gcKO	WT	OK	13.6041	11.6691	1.16582	0.221344	-0.578532	0.31235	0.536972	no
1012	XLOC_024780	Tuba8	chr6:121160787-121176115	gcKO	WT	OK	108.573	148.356	0.731841	-0.450388	1.40854	0.03405	0.129951	no
1013	XLOC_028890	Arhgef7	chr8:11713312-11835219	gcKO	WT	OK	14.1608	14.6397	0.967288	-0.0479803	0.120368	0.8277	0.913926	no
1014	XLOC_004120	Spag5	chr11:78115092-78135956	gcKO	WT	OK	30.2402	41.6797	0.725538	-0.462878	1.2926	0.02545	0.104461	no
1015	XLOC_007895	Nedd9	chr13:41405284-41582689	gcKO	WT	OK	1.90554	1.51259	1.25979	0.333174	-0.617339	0.27855	0.50249	no
1016	XLOC_029602	Agpat6	chr8:24283417-24318925	gcKO	WT	OK	107.824	152.306	0.707943	-0.4983	1.2509	0.03105	0.121077	no
1017	XLOC_010674	Eif3d	chr15:77789378-77801279	gcKO	WT	OK	65.2715	82.9958	0.786443	-0.346584	0.934948	0.09095	0.260153	no
1018	XLOC_031160	Nme6	chr9:109735307-109745646	gcKO	WT	OK	39.5968	55.8595	0.708864	-0.49642	1.21848	0.02145	0.0915122	no
1019	XLOC_010354	Prpf40b	chr15:99125806-99147608	gcKO	WT	OK	20.8464	24.2222	0.860632	-0.216529	0.554548	0.31065	0.535478	no
1020	XLOC_010605	Arc	chr15:74499510-74503000	gcKO	WT	OK	64.6751	77.8088	0.831205	-0.266724	0.693063	0.22305	0.443522	no
1021	XLOC_031326	Tyk2	chr9:20908480-20935719	gcKO	WT	OK	5.65023	5.45507	1.03578	0.0507112	-0.124482	0.8246	0.912323	no
1022	XLOC_019532	Syt11	chr3:88548616-88579087	gcKO	WT	OK	12.7191	13.8146	0.9207	-0.119203	0.305571	0.56915	0.750068	no
1023	XLOC_017915	Plagl2	chr2:153053504-153067094	gcKO	WT	OK	5.07198	3.83854	1.32133	0.401989	-0.952269	0.0949	0.267702	no
1024	XLOC_029212	Dnajb1	chr8:86132073-86135802	gcKO	WT	OK	123.244	170.726	0.721882	-0.470168	1.29973	0.03055	0.119666	no
1025	XLOC_025079	Mkrn1	chr6:39347801-39371034	gcKO	WT	OK	146.015	197.297	0.740077	-0.434255	1.04688	0.056	0.186321	no
1026	XLOC_026669	Abhd2	chr7:86416575-86510415	gcKO	WT	OK	46.8926	53.4604	0.877146	-0.189112	0.417201	0.4344	0.647335	no
1027	XLOC_006201	Pcnx	chr12:82960268-83101911	gcKO	WT	OK	15.8354	15.1702	1.04385	0.0619101	-0.160613	0.76315	0.875917	no
1028	XLOC_005480	Sgsh	chr11:119176100-119216824	gcKO	WT	OK	5.04312	3.38325	1.49061	0.575906	-0.792375	0.1145	0.298303	no
1029	XLOC_023478	Pebp1	chr5:117732383-117737573	gcKO	WT	OK	950.525	1292.51	0.73541	-0.44338	0.950372	0.0841	0.247029	no
1030	XLOC_007719	Akr1e1	chr13:4591735-4608410	gcKO	WT	OK	10.6634	19.1638	0.556435	-0.845722	2.37886	5e-04	0.00457226	yes
1031	XLOC_012756	Agpat1	chr17:34741018-34752916	gcKO	WT	OK	205.86	139.623	1.4744	0.560126	-1.31477	0.0305	0.119582	no
1032	XLOC_004609	Pgam2	chr11:5701639-5703799	gcKO	WT	OK	410.467	568.684	0.721784	-0.470362	1.66038	0.03525	0.133115	no
1033	XLOC_000824	Tmem131	chr1:36849033-36996481	gcKO	WT	OK	12.3122	10.2712	1.19871	0.261488	-0.656417	0.24675	0.467155	no
1034	XLOC_005197	Srcin1	chr11:97370653-97436440	gcKO	WT	OK	26.0322	38.3072	0.679564	-0.55732	1.46901	0.0093	0.0501429	no
1035	XLOC_023089	Paxip1	chr5:28067204-28117879	gcKO	WT	OK	6.30405	7.65523	0.823496	-0.280166	0.749599	0.20205	0.417805	no
1036	XLOC_008034	Fbp1	chr13:62966112-62989663	gcKO	WT	OK	223.289	368.06	0.606665	-0.721031	1.89667	0.00135	0.0108138	yes
1037	XLOC_007894	Elovl2	chr13:41277747-41315772	gcKO	WT	OK	63.4038	58.608	1.08183	0.113472	-0.305022	0.5958	0.768814	no
1038	XLOC_024898	Atf7ip	chr6:136466697-136559359	gcKO	WT	OK	10.7381	9.34375	1.14923	0.200667	-0.491316	0.37685	0.598273	no
1039	XLOC_025585	Atf7ip	chr6:136466697-136559359	gcKO	WT	OK	1.39997	0.285531	4.90304	2.29368	-0.565864	0.49455	0.695348	no
1040	XLOC_008754	Sfmbt1	chr14:31528034-31635907	gcKO	WT	OK	15.2911	18.5933	0.822398	-0.282085	0.757804	0.1762	0.387612	no
1041	XLOC_031447	Crtam	chr9:40780880-40812669	gcKO	WT	OK	16.8115	23.8878	0.703769	-0.506828	1.25353	0.02525	0.103827	no
1042	XLOC_022463	G6pd2	chr5:62197967-62202727	gcKO	WT	OK	18.9134	11.8495	1.59613	0.674579	-1.5676	0.0059	0.0353972	yes
1043	XLOC_020480	Rgs3	chr4:62220846-62364053	gcKO	WT	OK	19.9722	18.1587	1.09987	0.137329	-0.359212	0.51825	0.713369	no
1044	XLOC_009392	Rabggta	chr14:56334713-56346655	gcKO	WT	OK	11.8474	13.3735	0.885886	-0.174803	0.406604	0.4715	0.679478	no
1045	XLOC_022807	Dnahc10	chr5:125079647-125342977	gcKO	WT	OK	8.38523	11.5778	0.724251	-0.465437	0.564542	0.3138	0.538506	no
1046	XLOC_024335	Fscn3	chr6:28377856-28388622	gcKO	WT	OK	90.9769	160.637	0.566351	-0.820236	2.1068	0.00025	0.00244834	yes
1047	XLOC_029412	Wwox	chr8:116963551-117876612	gcKO	WT	OK	8.39781	11.8859	0.706535	-0.501163	0.659859	0.2259	0.446047	no
1048	XLOC_002917	Scamp4	chr10:80046360-80103516	gcKO	WT	OK	9.93402	10.5142	0.944819	-0.081889	0.0187733	0.8038	0.899653	no
1049	XLOC_022469	Tbc1d1	chr5:64551449-64742725	gcKO	WT	OK	28.353	33.2022	0.853949	-0.227778	0.596881	0.27695	0.500791	no
1050	XLOC_023549	Ubc	chr5:125866334-125870387	gcKO	WT	OK	97.8473	126.101	0.775944	-0.365971	1.08823	0.0889	0.256303	no
1051	XLOC_016902	Rpn2	chr2:157034164-157152057	gcKO	WT	OK	109.064	112.693	0.967797	-0.0472269	0.0862309	0.88025	0.940731	no
1052	XLOC_027351	Clptm1	chr7:20216928-20250379	gcKO	WT	OK	23.91	24.3735	0.980983	-0.0276992	0.0769282	0.89515	0.948263	no
1053	XLOC_030863	Ptpn9	chr9:56842774-56919773	gcKO	WT	OK	6.87471	5.92306	1.16067	0.214956	-0.515108	0.36005	0.583212	no
1054	XLOC_031610	Pias1	chr9:62726920-62835752	gcKO	WT	OK	28.7678	30.9181	0.930452	-0.103997	0.274702	0.62355	0.788263	no
1055	XLOC_017338	Stam2	chr2:52547716-52601183	gcKO	WT	OK	13.2692	12.97	1.02307	0.0329102	-0.0899264	0.8791	0.940142	no
1056	XLOC_011991	Tfg	chr16:56690441-56717690	gcKO	WT	OK	28.4096	23.6917	1.19914	0.261995	-0.683285	0.23045	0.449624	no
1057	XLOC_016203	Ncs1	chr2:31101442-31150991	gcKO	WT	OK	4.50233	4.46061	1.00935	0.0134304	-0.0316565	0.95635	0.97757	no
1058	XLOC_031576	Arid3b	chr9:57638159-57684487	gcKO	WT	OK	12.7392	14.6332	0.870568	-0.199973	0.513208	0.3584	0.58159	no
1059	XLOC_002037	Hbs1l	chr10:21015784-21088695	gcKO	WT	OK	39.8954	51.2371	0.778643	-0.360968	0.899167	0.13315	0.328075	no
1060	XLOC_007721	Pfkp	chr13:6547402-6647999	gcKO	WT	OK	20.618	34.1917	0.603012	-0.729741	1.76692	0.0021	0.0154971	yes
1061	XLOC_031115	Tmem115	chr9:107436275-107440987	gcKO	WT	OK	21.3758	24.1831	0.883915	-0.178025	0.496065	0.42055	0.635136	no
1062	XLOC_029421	Cdh13	chr8:120807654-121847971	gcKO	WT	OK	8.23115	5.76151	1.42864	0.514647	-0.886249	0.10745	0.289452	no
1063	XLOC_004794	Slc22a21	chr11:53764325-53793529	gcKO	WT	OK	22.9226	31.6467	0.724328	-0.465284	1.32283	0.03	0.118138	no
1064	XLOC_003998	Gps2	chr11:69727541-69730108	gcKO	WT	OK	72.7441	84.0257	0.865736	-0.208	0.541931	0.31835	0.542902	no
1065	XLOC_031630	Snx1	chr9:65935921-65986775	gcKO	WT	OK	64.4179	112.718	0.571496	-0.807185	2.12355	0.00055	0.00498413	yes
1066	XLOC_016685	Usp8	chr2:126532948-126585050	gcKO	WT	OK	50.9915	66.5195	0.766565	-0.38352	1.04338	0.0726	0.224374	no
1067	XLOC_020963	Slc2a5	chr4:149493350-149518277	gcKO	WT	OK	156.513	159.29	0.982566	-0.0253717	0.0580924	0.9133	0.958076	no
1068	XLOC_008771	Ncoa4	chr14:32973077-32992549	gcKO	WT	OK	51.0976	66.917	0.763597	-0.389119	1.06651	0.0647	0.206645	no
1069	XLOC_016500	Mtch2	chr2:90687311-90706878	gcKO	WT	OK	77.1935	103.951	0.742595	-0.429349	1.129	0.04355	0.155306	no
1070	XLOC_021651	Spen	chr4:141000355-141094512	gcKO	WT	OK	8.11792	6.90158	1.17624	0.234184	-0.52188	0.3533	0.576891	no
1071	XLOC_002556	Ptges3	chr10:127496037-127514310	gcKO	WT	OK	68.52	101.604	0.674383	-0.568367	1.8582	0.00885	0.0483497	yes
1072	XLOC_030612	Pde4a	chr9:20954456-21017693	gcKO	WT	OK	20.0732	19.176	1.04679	0.0659651	-0.15557	0.76885	0.879406	no
1073	XLOC_031328	Pde4a	chr9:20954456-21017693	gcKO	WT	OK	2.65658	13.2423	0.200613	-2.31751	0.944251	0.40885	0.625323	no
1074	XLOC_027805	Rhcg	chr7:86738248-86762543	gcKO	WT	OK	20.8931	22.3989	0.932773	-0.100402	0.279731	0.654	0.808514	no
1075	XLOC_016884	Acss2	chr2:155316063-155388539	gcKO	WT	OK	31.8703	30.0893	1.05919	0.0829639	-0.188571	0.74095	0.863151	no
1076	XLOC_031053	Atr	chr9:95755836-95852151	gcKO	WT	OK	39.4841	60.8629	0.648738	-0.62429	1.66167	0.00515	0.0317234	yes
1077	XLOC_012758	Fkbpl	chr17:34780884-34783516	gcKO	WT	OK	66.6577	106.133	0.628058	-0.671031	1.79625	0.0015	0.011864	yes
1078	XLOC_023537	Abcb9	chr5:124511864-124545807	gcKO	WT	OK	7.32874	7.2439	1.01171	0.016799	-0.0375272	0.9446	0.972513	no
1079	XLOC_010672	Txn2	chr15:77745350-77759424	gcKO	WT	OK	46.9882	52.4124	0.896509	-0.15761	0.345392	0.5164	0.711807	no
1080	XLOC_007900	Ranbp9	chr13:43493744-43576493	gcKO	WT	OK	91.3352	89.8514	1.01651	0.0236296	-0.0668717	0.91365	0.958283	no
1081	XLOC_001092	Ptpn4	chr1:121548950-121734137	gcKO	WT	OK	12.8014	17.7392	0.721645	-0.470643	1.19065	0.0544	0.182496	no
1082	XLOC_027672	Sec1	chr7:52932955-52949924	gcKO	WT	OK	13.5779	16.9756	0.799848	-0.322202	0.757561	0.1946	0.41086	no
1083	XLOC_029383	Pmfbp1	chr8:112017798-112066669	gcKO	WT	OK	145.882	223.882	0.651602	-0.617934	1.42983	0.01075	0.0559784	no
1084	XLOC_002171	Dnajb12	chr10:59342231-59362129	gcKO	WT	OK	13.0404	19.9287	0.654353	-0.611857	1.29766	0.0257	0.105093	no
1085	XLOC_019109	Sort1	chr3:108085276-108164448	gcKO	WT	OK	27.8027	31.0618	0.895077	-0.159916	0.409958	0.4608	0.670721	no
1086	XLOC_011693	Son	chr16:91648059-91688973	gcKO	WT	OK	45.1954	44.4693	1.01633	0.0233659	-0.0579445	0.91945	0.961116	no
1087	XLOC_020949	Mtor	chr4:147822690-147931931	gcKO	WT	OK	41.4735	34.2226	1.21187	0.27724	-0.714311	0.21675	0.436489	no
1088	XLOC_014209	Rnf14	chr18:38456288-38477637	gcKO	WT	OK	26.0646	20.9566	1.24374	0.314688	-0.815705	0.14325	0.343101	no
1089	XLOC_013370	Prrc2a	chr17:35286019-35302504	gcKO	WT	OK	30.3431	16.7694	1.80943	0.855542	-2.11332	0.00015	0.00153046	yes
1090	XLOC_015694	Poll	chr19:45626765-45635033	gcKO	WT	OK	33.7517	44.7471	0.754277	-0.406835	1.16454	0.05255	0.178241	no
1091	XLOC_021132	Pigo	chr4:43030395-43038666	gcKO	WT	OK	12.0873	9.89531	1.22152	0.288669	-0.685982	0.19585	0.411013	no
1092	XLOC_028087	Scube2	chr7:116942204-117009193	gcKO	WT	OK	8.50184	8.94576	0.950376	-0.073428	0.172063	0.75665	0.872283	no
1093	XLOC_023092	Lmbr1	chr5:29556341-29704946	gcKO	WT	OK	6.7371	9.63845	0.698982	-0.516673	1.35131	0.01865	0.083272	no
1094	XLOC_016970	Slc12a5	chr2:164793487-164825372	gcKO	WT	OK	2.14452	2.4438	0.877535	-0.188469	0.409226	0.45305	0.664445	no
1095	XLOC_006772	Ddx24	chr12:104646185-104664077	gcKO	WT	OK	42.3481	52.3393	0.809107	-0.305598	0.814269	0.14125	0.340061	no
1096	XLOC_009421	Xpo4	chr14:58198613-58284017	gcKO	WT	OK	8.80889	15.4414	0.570472	-0.809768	1.98374	0.00085	0.00732236	yes
1097	XLOC_002158	Smpdl3a	chr10:57514154-57531636	gcKO	WT	OK	9.29829	12.8677	0.722607	-0.468716	1.16165	0.0595	0.194665	no
1098	XLOC_013218	Cramp1l	chr17:25098057-25152725	gcKO	WT	OK	8.20754	6.05533	1.35542	0.438745	-1.10226	0.04125	0.149567	no
1099	XLOC_006032	Taf1b	chr12:25183445-25243436	gcKO	WT	OK	15.4565	35.3627	0.437085	-1.19401	3.05777	5e-05	0.000597811	yes
1100	XLOC_016925	Plcg1	chr2:160557045-160698768	gcKO	WT	OK	5.58765	6.56966	0.850523	-0.233577	0.275407	0.6165	0.783816	no
1101	XLOC_004108	Sez6	chr11:77744444-77792544	gcKO	WT	NOTEST	0.763908	0.706526	1.08122	0.112655	0	1	1	no
1102	XLOC_000939	Lancl1	chr1:67047090-67085510	gcKO	WT	OK	58.6563	85.3424	0.687305	-0.540976	1.37437	0.016	0.0748594	no
1103	XLOC_015179	Ak3	chr19:29095321-29123435	gcKO	WT	OK	3.17857	3.23973	0.981122	-0.0274925	0.0332825	0.9545	0.976582	no
1104	XLOC_015597	Ak3	chr19:29095321-29123435	gcKO	WT	OK	12.9944	10.8482	1.19784	0.260436	-0.454703	0.43365	0.646716	no
1105	XLOC_021072	Fhl5	chr4:25126853-25170385	gcKO	WT	OK	110.139	196.032	0.561842	-0.831765	2.28502	1e-04	0.00104973	yes
1106	XLOC_009006	Bin3	chr14:70499951-70553780	gcKO	WT	OK	18.1822	26.1067	0.696457	-0.521895	0.693185	0.24455	0.464647	no
1107	XLOC_012889	Zfp318	chr17:46520714-46557867	gcKO	WT	OK	33.018	48.5023	0.680751	-0.554802	1.42041	0.0131	0.0649019	no
1108	XLOC_003910	Drg2	chr11:60268118-60282207	gcKO	WT	OK	13.2064	18.6663	0.7075	-0.499198	1.36362	0.0308	0.120289	no
1109	XLOC_029202	Gab1	chr8:83288302-83405072	gcKO	WT	OK	8.93278	12.504	0.714394	-0.485213	0.321326	0.56855	0.749828	no
1110	XLOC_029810	Gab1	chr8:83288302-83405072	gcKO	WT	OK	8.57418	5.93103	1.44565	0.531717	-1.22483	0.03425	0.130476	no
1111	XLOC_020493	Pappa	chr4:64785207-65018543	gcKO	WT	OK	4.2311	3.20471	1.32028	0.400838	-0.907211	0.11255	0.294967	no
1112	XLOC_000236	Rqcd1	chr1:74455957-74634602	gcKO	WT	OK	19.7264	15.9872	1.23389	0.303217	-0.290055	0.63175	0.792725	no
1113	XLOC_019127	Extl2	chr3:115710366-115731934	gcKO	WT	OK	8.26913	9.22467	0.896415	-0.157762	0.375568	0.51095	0.707491	no
1114	XLOC_019746	Extl2	chr3:115710366-115731934	gcKO	WT	OK	363.238	0	#DIV/0!	#VALUE!	NA	0.1276	0.318619	no
1115	XLOC_000707	Ush2a	chr1:190086716-190789382	gcKO	WT	OK	5.11057	4.64439	1.10037	0.137996	-0.351135	0.531	0.723034	no
1116	XLOC_025054	Slc35b4	chr6:34105878-34127054	gcKO	WT	OK	9.05797	9.48446	0.955033	-0.0663786	0.173667	0.763	0.875917	no
1117	XLOC_005471	BC100451	chr11:118162374-118216725	gcKO	WT	OK	162.029	271.616	0.596537	-0.745317	1.47584	0.01435	0.0691619	no
1118	XLOC_025377	Crbn	chr6:106719131-106750081	gcKO	WT	OK	15.8813	26.9996	0.588205	-0.76561	1.65091	0.0068	0.0396417	yes
1119	XLOC_002919	Mknk2	chr10:80128005-80138660	gcKO	WT	OK	27.1535	17.7568	1.52919	0.612766	-1.54151	0.0066	0.0387364	yes
1120	XLOC_022333	Rnf32	chr5:29522557-29552963	gcKO	WT	OK	132.599	190.13	0.697412	-0.519915	1.36175	0.0189	0.0841638	no
1121	XLOC_029944	Smpd3	chr8:108776283-108861888	gcKO	WT	OK	8.86737	9.91836	0.894036	-0.161595	0.41103	0.4616	0.671102	no
1122	XLOC_004287	Arhgap23	chr11:97300781-97363714	gcKO	WT	OK	7.78189	6.35197	1.22511	0.292916	-0.532742	0.34195	0.566795	no
1123	XLOC_005196	Arhgap23	chr11:97300781-97363714	gcKO	WT	OK	6.65032	9.36032	0.71048	-0.493135	0.532889	0.3088	0.533608	no
1124	XLOC_028088	Dennd5a	chr7:117037293-117103936	gcKO	WT	OK	25.6161	17.8139	1.43798	0.524045	-1.41947	0.012	0.0606641	no
1125	XLOC_002932	Pias4	chr10:80616010-80630648	gcKO	WT	OK	55.0035	80.2316	0.685559	-0.544648	1.33497	0.01845	0.0826434	no
1126	XLOC_008692	Ngly1	chr14:17071172-17144440	gcKO	WT	OK	73.9283	123.85	0.596918	-0.744396	2.01059	0.001	0.00841541	yes
1127	XLOC_006589	Ppp2r3c	chr12:56381800-56483478	gcKO	WT	OK	20.529	28.7537	0.71396	-0.486084	1.1662	0.0642	0.205388	no
1128	XLOC_010373	Slc4a8	chr15:100592161-100654402	gcKO	WT	OK	3.84518	3.88626	0.989429	-0.0153286	0.0379844	0.94155	0.970925	no
1129	XLOC_001052	Stk25	chr1:95408680-95532304	gcKO	WT	OK	57.3378	72.9288	0.786216	-0.347003	0.883755	0.1193	0.305798	no
1130	XLOC_010167	Fam203a	chr15:76199327-76202314	gcKO	WT	OK	17.3915	19.6403	0.885501	-0.17543	0.41024	0.46565	0.674753	no
1131	XLOC_006665	Rdh11	chr12:80275200-80293474	gcKO	WT	OK	121.44	138.179	0.87886	-0.186293	0.422143	0.4458	0.657568	no
1132	XLOC_002858	Pcbp3	chr10:76224596-76424692	gcKO	WT	OK	24.8881	18.6958	1.33121	0.412745	-1.04021	0.06675	0.211312	no
1133	XLOC_026982	Dctn5	chr7:129276554-129292558	gcKO	WT	OK	14.3301	14.1017	1.0162	0.0231804	-0.0625418	0.9226	0.962646	no
1134	XLOC_012644	Tmem8	chr17:26250260-26260204	gcKO	WT	OK	27.2207	28.5063	0.954901	-0.0665786	0.173095	0.7499	0.867847	no
1135	XLOC_026910	Tub	chr7:116154393-116226838	gcKO	WT	OK	3.67081	2.80774	1.30739	0.386686	-0.718761	0.21325	0.431864	no
1136	XLOC_010306	Mapk8ip2	chr15:89284341-89292878	gcKO	WT	OK	29.0891	28.2362	1.03021	0.0429309	-0.106365	0.8471	0.923975	no
1137	XLOC_004865	Flii	chr11:60513191-60540723	gcKO	WT	OK	12.2434	8.93658	1.37003	0.454208	-0.920866	0.1054	0.286078	no
1138	XLOC_015007	Map3k11	chr19:5664634-5702864	gcKO	WT	OK	14.6317	12.2107	1.19827	0.260948	-0.390396	0.4851	0.688257	no
1139	XLOC_031655	Aqp9	chr9:70958465-71016492	gcKO	WT	OK	14.3455	15.8435	0.90545	-0.143292	0.359705	0.5157	0.711388	no
1140	XLOC_013115	Tcte2	chr17:13848943-14042801	gcKO	WT	OK	61.436	73.8979	0.831363	-0.266449	0.585851	0.36255	0.585487	no
1141	XLOC_013552	Mllt1	chr17:57031260-57074879	gcKO	WT	OK	17.0786	17.2215	0.991702	-0.0120155	0.0306485	0.9564	0.97757	no
1142	XLOC_011812	Dgcr14	chr16:17840450-17911441	gcKO	WT	OK	9.88911	13.1071	0.754485	-0.406433	0.1722	0.7695	0.879669	no
1143	XLOC_026407	Sirt2	chr7:29541192-29573684	gcKO	WT	OK	74.5308	48.9838	1.52154	0.605532	-1.39584	0.0295	0.116754	no
1144	XLOC_028286	Sirt3	chr7:148039246-148084548	gcKO	WT	OK	29.2503	31.8414	0.918625	-0.122452	0.179305	0.78235	0.887212	no
1145	XLOC_019158	Ndst4	chr3:125107008-125427904	gcKO	WT	OK	18.7083	24.0497	0.777902	-0.362335	0.860158	0.13315	0.328075	no
1146	XLOC_002341	Thop1	chr10:80532682-80545277	gcKO	WT	OK	119.675	186.775	0.640744	-0.642179	1.6354	0.0041	0.026786	yes
1147	XLOC_030872	Scamp2	chr9:57408750-57436606	gcKO	WT	OK	42.2079	38.4184	1.09864	0.135715	-0.336211	0.52375	0.717998	no
1148	XLOC_016168	Tsc1	chr2:28496112-28546687	gcKO	WT	OK	6.95349	8.05685	0.863053	-0.212479	0.547621	0.3233	0.548181	no
1149	XLOC_027936	Nup98	chr7:109267868-109387068	gcKO	WT	OK	71.8366	110.351	0.650983	-0.619308	1.37692	0.0201	0.0873063	no
1150	XLOC_026189	Zfp110	chr7:13420158-13435938	gcKO	WT	OK	31.7919	54.6302	0.581947	-0.781041	2.18351	3e-04	0.00288736	yes
1151	XLOC_019535	Dap3	chr3:88724724-88754331	gcKO	WT	OK	28.4641	40.326	0.70585	-0.502569	1.30487	0.01555	0.0735346	no
1152	XLOC_029851	Vps35	chr8:87784286-87823428	gcKO	WT	OK	28.3817	39.0811	0.726226	-0.46151	1.28084	0.02955	0.116823	no
1153	XLOC_022348	Dpysl5	chr5:31013984-31168823	gcKO	WT	OK	4.95073	4.04321	1.22446	0.29214	-0.326428	0.5713	0.751718	no
1154	XLOC_023103	Dpysl5	chr5:31013984-31168823	gcKO	WT	OK	2.99189	6.67253	0.448389	-1.15718	0.601508	0.501	0.700419	no
1155	XLOC_025320	Eefsec	chr6:88207327-88396533	gcKO	WT	OK	19.8043	22.7689	0.869796	-0.201252	0.524651	0.35405	0.577478	no
1156	XLOC_004704	Ranbp17	chr11:33111561-33413760	gcKO	WT	OK	17.7005	25.0258	0.70729	-0.499622	1.31589	0.01795	0.0807493	no
1157	XLOC_010159	Grina	chr15:76077236-76080334	gcKO	WT	OK	115.042	98.5956	1.16681	0.222563	-0.636659	0.3028	0.52712	no
1158	XLOC_019745	Slc30a7	chr3:115641890-115710324	gcKO	WT	OK	1.30428	1.29126	1.01008	0.0144729	-0.0322537	0.9567	0.977718	no
1159	XLOC_018029	Ube2v1	chr2:167433138-167457505	gcKO	WT	OK	29.0346	29.8631	0.972257	-0.0405872	0.118988	0.84805	0.924438	no
1160	XLOC_031832	Ndufaf3	chr9:108462706-108481001	gcKO	WT	OK	148.13	216.869	0.683039	-0.549961	1.07975	0.12915	0.321404	no
1161	XLOC_011421	Ypel1	chr16:17070225-17111369	gcKO	WT	OK	142.713	179.123	0.796732	-0.327838	0.775928	0.24615	0.466452	no
1162	XLOC_024746	Mkrn2	chr6:115551955-115626653	gcKO	WT	OK	25.6944	39.0811	0.657464	-0.605016	1.27567	0.0377	0.139844	no
1163	XLOC_020366	Ubap1	chr4:41295935-41411925	gcKO	WT	OK	24.5236	24.243	1.01157	0.0166001	-0.0361435	0.95065	0.974838	no
1164	XLOC_023697	Zkscan14	chr5:145955814-145962751	gcKO	WT	OK	3.66913	4.62901	0.792638	-0.335263	0.698425	0.2553	0.476742	no
1165	XLOC_008001	Agtpbp1	chr13:59550778-59658680	gcKO	WT	OK	46.425	66.7972	0.695014	-0.524885	1.38706	0.01475	0.0704411	no
1166	XLOC_026489	Zfp788	chr7:48888876-48906902	gcKO	WT	OK	3.45402	3.76845	0.916563	-0.125696	0.29016	0.62975	0.791606	no
1167	XLOC_002321	Mum1	chr10:79689342-79707889	gcKO	WT	OK	102.261	149.012	0.68626	-0.54317	1.33616	0.0174	0.0788968	no
1168	XLOC_008874	Tox4	chr14:52881433-52924799	gcKO	WT	OK	17.1223	20.2583	0.845199	-0.242629	0.593762	0.30875	0.533558	no
1169	XLOC_003948	Elac2	chr11:64792536-64976463	gcKO	WT	OK	11.5897	13.5339	0.856346	-0.223728	0.49411	0.4142	0.629444	no
1170	XLOC_031525	1110032A03Rik	chr9:50570932-50576257	gcKO	WT	OK	72.1614	108.45	0.665389	-0.587735	1.6078	0.00515	0.0317234	yes
1171	XLOC_009114	Ipo5	chr14:121295757-121347266	gcKO	WT	OK	272.499	431.797	0.631081	-0.679777	1.16018	0.05765	0.190548	no
1172	XLOC_021244	Wdr31	chr4:62114767-62131906	gcKO	WT	OK	75.3305	122.305	0.615923	-0.699173	2.19505	0.0011	0.00909546	yes
1173	XLOC_000166	Aox3	chr1:58169979-58257401	gcKO	WT	OK	10.8471	9.73701	1.11401	0.15576	-0.405542	0.4744	0.681794	no
1174	XLOC_023492	Plbd2	chr5:120926555-120953632	gcKO	WT	OK	29.3971	24.2444	1.21253	0.27802	-0.709663	0.19445	0.41086	no
1175	XLOC_024323	Ing3	chr6:21899614-21926037	gcKO	WT	OK	5.36636	8.15011	0.65844	-0.602876	1.52188	0.0096	0.0511349	no
1176	XLOC_013055	Gtf2a1l	chr17:89067999-89114490	gcKO	WT	OK	131.772	161.961	0.813603	-0.297598	0.879951	0.15915	0.364834	no
1177	XLOC_000167	Aox4	chr1:58267240-58325440	gcKO	WT	OK	1.14154	1.1209	1.01841	0.0263205	-0.0460411	0.9389	0.969905	no
1178	XLOC_024482	Igf2bp3	chr6:49035165-49164953	gcKO	WT	OK	4.81275	2.76795	1.73874	0.798045	-0.0937289	0.78165	0.886658	no
1179	XLOC_025139	Igf2bp3	chr6:49035165-49164953	gcKO	WT	OK	21.9444	41.3622	0.530542	-0.914461	2.77526	5e-05	0.000597811	yes
1180	XLOC_000722	Rd3	chr1:193801253-193812163	gcKO	WT	OK	1.35285	3.2141	0.420911	-1.24841	2.18152	0.00015	0.00153046	yes
1181	XLOC_000972	Abcb6	chr1:75168214-75176857	gcKO	WT	OK	16.5133	19.3933	0.851495	-0.231928	0.638227	0.2822	0.505553	no
1182	XLOC_028312	Tollip	chr7:149067484-149103893	gcKO	WT	OK	40.8021	38.6791	1.05489	0.0770894	-0.204767	0.71095	0.844719	no
1183	XLOC_003658	Ankrd36	chr11:5469678-5590177	gcKO	WT	OK	53.2796	89.375	0.596135	-0.746289	1.98034	0.00075	0.00657133	yes
1184	XLOC_030783	Ift46	chr9:44549730-44600797	gcKO	WT	OK	26.7731	27.9091	0.959296	-0.059947	0.104481	0.8502	0.925643	no
1185	XLOC_016523	Chst1	chr2:92381284-92455551	gcKO	WT	OK	12.7615	14.6746	0.869632	-0.201518	0.181019	0.7255	0.853769	no
1186	XLOC_030558	Mtmr2	chr9:13553624-13610927	gcKO	WT	OK	19.3532	24.4678	0.790966	-0.338311	0.942429	0.10425	0.284092	no
1187	XLOC_027790	Slco3a1	chr7:81420303-81699666	gcKO	WT	OK	14.5502	11.7545	1.23784	0.30783	-0.751764	0.17865	0.39088	no
1188	XLOC_014208	0610009O20Rik	chr18:38398058-38422283	gcKO	WT	OK	24.2644	28.5993	0.848426	-0.237144	0.603117	0.26995	0.493174	no
1189	XLOC_017008	Cstf1	chr2:172181690-172206808	gcKO	WT	OK	53.2794	56.0852	0.949973	-0.0740442	0.124288	0.82265	0.911521	no
1190	XLOC_012517	Fam120b	chr17:15533165-15570545	gcKO	WT	OK	13.1719	14.4058	0.914347	-0.129187	0.339858	0.5473	0.735118	no
1191	XLOC_031884	Stt3b	chr9:115151699-115221381	gcKO	WT	OK	120.429	154.422	0.779869	-0.358697	0.9146	0.1256	0.31538	no
1192	XLOC_005502	Pcyt2	chr11:120471330-120479249	gcKO	WT	OK	29.7829	30.8734	0.964678	-0.051883	0.133598	0.80785	0.90212	no
1193	XLOC_021109	Kif24	chr4:41295935-41411925	gcKO	WT	OK	5.29558	6.13115	0.863717	-0.211367	0.309569	0.58165	0.759449	no
1194	XLOC_031600	Kif23	chr9:61765084-61794606	gcKO	WT	OK	7.94132	11.7311	0.676946	-0.562882	1.47634	0.0133	0.0652659	no
1195	XLOC_021009	Mxra8	chr4:155212951-155218211	gcKO	WT	OK	14.0051	19.6057	0.714338	-0.48532	1.19455	0.0359	0.13482	no
1196	XLOC_007394	Fars2	chr13:36070665-36629463	gcKO	WT	OK	35.3404	46.6725	0.7572	-0.401257	0.956698	0.0888	0.256132	no
1197	XLOC_029351	Tsnaxip1	chr8:108292207-108375908	gcKO	WT	OK	84.1413	128.896	0.652784	-0.615325	1.49724	0.01885	0.0839858	no
1198	XLOC_021766	Gltpd1	chr4:155238831-155243560	gcKO	WT	OK	44.6055	56.1913	0.793815	-0.333126	0.806238	0.15395	0.35758	no
1199	XLOC_022677	Ttc28	chr5:111308821-111718799	gcKO	WT	OK	2.09181	1.53143	1.36592	0.449878	-0.82602	0.15	0.352875	no
1200	XLOC_002930	Sgta	chr10:80506691-80522949	gcKO	WT	OK	51.1584	55.6366	0.91951	-0.121061	0.314983	0.57525	0.754584	no
1201	XLOC_021198	Actl7b	chr4:56752876-56754297	gcKO	WT	OK	402.6	500.954	0.803667	-0.31533	0.829668	0.19115	0.407164	no
1202	XLOC_004442	Amz2	chr11:109286992-109299462	gcKO	WT	OK	207.219	259.856	0.797438	-0.32655	0.771387	0.1743	0.384925	no
1203	XLOC_031409	Tbrg1	chr9:37456766-37464897	gcKO	WT	OK	73.996	77.5203	0.954537	-0.0671279	0.209044	0.7514	0.868623	no
1204	XLOC_026971	Polr3e	chr7:128061257-128090946	gcKO	WT	OK	11.2301	11.3094	0.992988	-0.0101524	0.0262807	0.96225	0.980449	no
1205	XLOC_004184	Myo19	chr11:84689814-84729858	gcKO	WT	OK	8.12445	7.74696	1.04873	0.068641	-0.106684	0.858	0.928727	no
1206	XLOC_017232	Zdhhc12	chr2:29934285-29949155	gcKO	WT	OK	28.1908	21.5852	1.30602	0.385183	-0.780081	0.1698	0.379414	no
1207	XLOC_010755	Arfgap3	chr15:83129944-83180750	gcKO	WT	OK	47.4364	58.1297	0.816044	-0.293279	0.764229	0.16815	0.377069	no
1208	XLOC_031133	Nicn1	chr9:108192787-108198827	gcKO	WT	OK	9.94275	12.9138	0.769932	-0.377203	0.955894	0.10255	0.281382	no
1209	XLOC_005371	Smurf2	chr11:106681375-106782037	gcKO	WT	OK	12.7042	15.2294	0.834189	-0.261555	0.730478	0.2234	0.443937	no
1210	XLOC_021356	Mrpl37	chr4:106728407-106739471	gcKO	WT	OK	24.5113	33.3037	0.735993	-0.442236	1.11891	0.0486	0.168228	no
1211	XLOC_026353	Atp5sl	chr7:26404454-26410652	gcKO	WT	OK	19.9418	20.2593	0.984328	-0.0227859	0.0543096	0.9213	0.962074	no
1212	XLOC_029357	Dus2l	chr8:108532779-108577723	gcKO	WT	OK	7.84889	8.3849	0.936074	-0.0953053	0.164712	0.75715	0.872397	no
1213	XLOC_025349	Mrps25	chr6:92041411-92134017	gcKO	WT	OK	8.81186	9.6359	0.914482	-0.128973	0.237777	0.69505	0.834991	no
1214	XLOC_015491	Asrgl1	chr19:9186208-9210056	gcKO	WT	OK	257.686	393.939	0.654127	-0.612361	1.60819	0.0103	0.0540949	no
1215	XLOC_031092	Aste1	chr9:105297640-105308086	gcKO	WT	OK	24.6675	31.3313	0.787312	-0.344995	0.828433	0.14795	0.349986	no
1216	XLOC_016906	Ctnnbl1	chr2:157563130-157718348	gcKO	WT	OK	44.0592	52.3293	0.84196	-0.248177	0.652729	0.2364	0.456438	no
1217	XLOC_022524	Srp72	chr5:77403725-77428960	gcKO	WT	OK	24.0939	36.1781	0.66598	-0.586448	1.72126	0.0058	0.0349726	yes
1218	XLOC_017276	Gapvd1	chr2:34531636-34610752	gcKO	WT	OK	14.4046	13.7824	1.04514	0.0637033	-0.146726	0.77985	0.885696	no
1219	XLOC_014980	Rbm4b	chr19:4753698-4766007	gcKO	WT	OK	69.5546	100.317	0.693348	-0.528348	1.25478	0.02465	0.101994	no
1220	XLOC_031606	Spesp1	chr9:62118469-62130015	gcKO	WT	OK	62.8529	95.4723	0.658337	-0.603102	1.73705	0.0043	0.0275973	yes
1221	XLOC_004334	Klhl10	chr11:100303237-100318338	gcKO	WT	OK	135.251	227.189	0.595324	-0.748254	2.21453	7e-04	0.00618284	yes
1222	XLOC_015043	Hrasls5	chr19:7686804-7715845	gcKO	WT	OK	396.288	514.737	0.769884	-0.377286	0.986967	0.09125	0.260744	no
1223	XLOC_023684	Ankrd61	chr5:144578660-144670708	gcKO	WT	OK	59.2377	78.4318	0.755277	-0.404921	0.958875	0.15435	0.358045	no
1224	XLOC_030006	Kcng4	chr8:122147739-122159580	gcKO	WT	OK	5.57712	4.95025	1.12663	0.172019	-0.382517	0.48305	0.687335	no
1225	XLOC_015190	Trpd52l3	chr19:30078279-30080510	gcKO	WT	OK	23.6903	29.7531	0.79623	-0.328745	0.989898	0.1262	0.316192	no
1226	XLOC_000782	4933415F23Rik	chr1:23107245-23109092	gcKO	WT	OK	146.192	224.42	0.651421	-0.618335	1.56215	0.00505	0.0312607	yes
1227	XLOC_029048	4933411K20Rik	chr8:47118614-47280944	gcKO	WT	OK	67.0076	105.824	0.633199	-0.659273	1.57084	0.00725	0.0415609	yes
1228	XLOC_014251	Zfp474	chr18:52775568-52802351	gcKO	WT	OK	49.313	63.9833	0.770717	-0.375728	0.996733	0.08075	0.240793	no
1229	XLOC_015255	4933411K16Rik	chr19:42120340-42145429	gcKO	WT	OK	471.297	743.371	0.634	-0.657445	1.52302	0.0066	0.0387364	yes
1230	XLOC_024885	Bcl2l14	chr6:134346346-134388742	gcKO	WT	OK	71.7273	102.864	0.697302	-0.520148	1.48512	0.01635	0.0761706	no
1231	XLOC_012481	Rsph3a	chr17:8138478-8172421	gcKO	WT	OK	24.7609	36.7973	0.6729	-0.571534	1.71704	0.01015	0.0534636	no
1232	XLOC_011430	Lztr1	chr16:17509063-17526423	gcKO	WT	OK	8.96079	10.3064	0.869439	-0.201839	0.554281	0.36145	0.584538	no
1233	XLOC_029252	Lonp2	chr8:89147941-89240535	gcKO	WT	OK	24.6627	21.8101	1.13079	0.177335	-0.431631	0.47225	0.680135	no
1234	XLOC_029378	Wwp2	chr8:109960297-110082495	gcKO	WT	OK	33.4182	47.3159	0.706278	-0.50169	1.37221	0.01775	0.0800646	no
1235	XLOC_031570	Mpi	chr9:57392074-57400559	gcKO	WT	OK	90.9125	115.648	0.786114	-0.347185	1.06933	0.1007	0.278129	no
1236	XLOC_012490	1700010I14Rik	chr17:9181029-9201468	gcKO	WT	OK	162.239	247.794	0.654733	-0.611021	1.54693	0.00595	0.0356036	yes
1237	XLOC_026212	Napa	chr7:16683806-16703324	gcKO	WT	OK	48.7483	66.833	0.729405	-0.455207	1.0298	0.07265	0.224473	no
1238	XLOC_021606	Rpl11	chr4:135605862-135609286	gcKO	WT	OK	411.803	559.172	0.736451	-0.441338	1.79204	0.0396	0.145304	no
1239	XLOC_001053	Thap4	chr1:95601967-95651415	gcKO	WT	OK	62.0168	69.0649	0.89795	-0.155293	0.443723	0.46155	0.671102	no
1240	XLOC_009596	Dzip1	chr14:119274736-119325521	gcKO	WT	OK	60.3926	85.7567	0.704232	-0.505877	1.33397	0.02165	0.0922715	no
1241	XLOC_030623	Ccdc159	chr9:21725448-21740660	gcKO	WT	OK	37.0222	53.6378	0.690226	-0.534859	0.738944	0.15805	0.363506	no
1242	XLOC_006036	Mboat2	chr12:25516463-25645938	gcKO	WT	OK	9.26704	7.03391	1.31748	0.397781	-0.947841	0.0962	0.270216	no
1243	XLOC_000552	Pigc	chr1:163872219-163909767	gcKO	WT	OK	6.65376	7.56944	0.879029	-0.186017	0.366367	0.52155	0.716351	no
1244	XLOC_002913	Atp8b3	chr10:79982243-80001890	gcKO	WT	OK	315.573	394.867	0.799188	-0.323393	0.643714	0.24885	0.469338	no
1245	XLOC_005076	Rffl	chr11:82594636-82684712	gcKO	WT	OK	33.6705	39.4342	0.85384	-0.227964	0.265207	0.6167	0.783864	no
1246	XLOC_032799	Vsig1	chrX:137442146-137474011	gcKO	WT	OK	27.6784	33.8159	0.818503	-0.288939	0.859556	0.1726	0.383177	no
1247	XLOC_003950	Zkscan6	chr11:65620697-65642741	gcKO	WT	OK	9.86011	11.7832	0.836794	-0.257059	0.616026	0.27285	0.496378	no
1248	XLOC_032926	Wdr13	chrX:7700426-7710259	gcKO	WT	OK	9.76837	9.17151	1.06508	0.0909581	-0.230563	0.68585	0.828814	no
1249	XLOC_026933	Far1	chr7:120657363-120714332	gcKO	WT	OK	10.517	13.1086	0.802298	-0.317797	0.91927	0.16615	0.374087	no
1250	XLOC_028103	Far1	chr7:120657363-120714332	gcKO	WT	OK	5.80181	10.894	0.532569	-0.908956	0.878359	0.45615	0.666811	no
1251	XLOC_028713	Far1	chr7:120657363-120714332	gcKO	WT	OK	2.8599	3.3989	0.841419	-0.249105	0.105092	0.86145	0.93039	no
1252	XLOC_025640	Ergic2	chr6:147995937-148392874	gcKO	WT	OK	45.9531	77.1865	0.595352	-0.748185	1.45121	0.0288	0.11467	no
1253	XLOC_009001	Entpd4	chr14:69947382-69984818	gcKO	WT	OK	54.6327	34.1077	1.60177	0.679668	-1.56608	0.00475	0.0298898	yes
1254	XLOC_003645	Sf3a1	chr11:4035162-4082544	gcKO	WT	OK	13.4644	14.8309	0.907861	-0.139448	0.232286	0.6811	0.82622	no
1255	XLOC_013035	Abcg8	chr17:85082470-85099673	gcKO	WT	OK	0.942948	1.76041	0.535641	-0.900663	1.34618	0.0281	0.112561	no
1256	XLOC_007244	Ero1lb	chr13:12657628-12742662	gcKO	WT	OK	30.9037	60.1611	0.513682	-0.96105	2.53945	5e-05	0.000597811	yes
1257	XLOC_000247	Ankzf1	chr1:75188733-75207397	gcKO	WT	OK	5.92099	7.4631	0.793369	-0.333937	0.282576	0.6205	0.786227	no
1258	XLOC_019072	Ap4b1	chr3:103613439-103625948	gcKO	WT	OK	19.5055	25.4092	0.767655	-0.381472	1.00851	0.0749	0.229534	no
1259	XLOC_002035	Ahi1	chr10:20672352-20800236	gcKO	WT	OK	35.212	47.8075	0.736537	-0.441171	1.16387	0.0446	0.157818	no
1260	XLOC_019645	Gpr89	chr3:96602685-96709221	gcKO	WT	OK	10.2689	10.78	0.952588	-0.070078	0.0414258	0.94065	0.970714	no
1261	XLOC_031215	Wdr48	chr9:119803984-119846676	gcKO	WT	OK	67.0606	79.4311	0.844261	-0.244238	0.599158	0.30055	0.524803	no
1262	XLOC_012636	Narfl	chr17:25898911-25922531	gcKO	WT	OK	11.1356	12.88	0.864565	-0.209954	0.441198	0.46985	0.678156	no
1263	XLOC_008779	Lrrc18	chr14:33772732-34003162	gcKO	WT	OK	243.866	467.338	0.521819	-0.938379	2.63832	3e-04	0.00288736	yes
1264	XLOC_020820	Ubxn11	chr4:133658497-133682701	gcKO	WT	OK	125.854	212.099	0.593374	-0.752989	1.97228	0.00055	0.00498413	yes
1265	XLOC_015650	Tctn3	chr19:40670935-40686705	gcKO	WT	OK	9.42825	10.4618	0.901207	-0.150062	0.378261	0.5136	0.709427	no
1266	XLOC_012040	4930453N24Rik	chr16:64751961-64770965	gcKO	WT	OK	279.536	429.34	0.651083	-0.619087	1.62214	0.0048	0.0301214	yes
1267	XLOC_023115	Ift172	chr5:31555620-31593529	gcKO	WT	OK	90.3155	129.93	0.695109	-0.524691	1.24801	0.03015	0.118505	no
1268	XLOC_014115	Rnf125	chr18:21103125-21142419	gcKO	WT	OK	19.8859	26.2572	0.75735	-0.400965	1.05563	0.0813	0.241659	no
1269	XLOC_014281	Dctn4	chr18:60685824-60718466	gcKO	WT	OK	44.5604	77.8366	0.572486	-0.804686	0.48315	0.35	0.573666	no
1270	XLOC_020432	Stx17	chr4:48137764-48199381	gcKO	WT	OK	10.6988	13.0448	0.820158	-0.286027	0.774053	0.17485	0.385597	no
1271	XLOC_029834	Ccdc130	chr8:86781693-86794259	gcKO	WT	OK	27.6724	26.6757	1.03736	0.0529211	-0.138338	0.81025	0.904117	no
1272	XLOC_013022	Ttc39d	chr17:80599419-80617532	gcKO	WT	OK	50.1338	86.9743	0.576421	-0.794805	1.63606	0.0071	0.0409158	yes
1273	XLOC_025640	Ergic2	chr6:147995937-148392874	gcKO	WT	OK	45.9531	77.1865	0.595352	-0.748185	1.45121	0.0288	0.11467	no
1274	XLOC_009461	4930578I06Rik	chr14:64588114-64606738	gcKO	WT	OK	114.619	161.731	0.708701	-0.496753	1.25038	0.0241	0.100148	no
1275	XLOC_016311	Pkp4	chr2:58998906-59193262	gcKO	WT	OK	9.54042	17.2221	0.553964	-0.852132	2.16293	0.00025	0.00244834	yes
1276	XLOC_005453	Prpsap1	chr11:116331753-116355900	gcKO	WT	OK	15.313	16.8933	0.906454	-0.141695	0.37023	0.5393	0.729286	no
1277	XLOC_024729	Jagn1	chr6:113392510-113398223	gcKO	WT	OK	26.3702	22.5265	1.17063	0.227287	-0.540128	0.3432	0.567818	no
1278	XLOC_015017	Cdca5	chr19:6080037-6098588	gcKO	WT	OK	24.457	33.3304	0.733775	-0.446592	0.930353	0.0822	0.243125	no
1279	XLOC_022317	Galntl5	chr5:24687297-24726107	gcKO	WT	OK	143.643	246.517	0.58269	-0.779205	2.41757	3e-04	0.00288736	yes
1280	XLOC_009524	Spert	chr14:75982640-75992923	gcKO	WT	OK	356.044	550.795	0.646418	-0.629461	1.45279	0.00805	0.0448074	yes
1281	XLOC_026961	Abca14	chr7:127347468-127468869	gcKO	WT	OK	14.3035	23.236	0.615575	-0.699996	1.9196	0.00065	0.00580036	yes
1282	XLOC_022805	Tctn2	chr5:125048757-125077658	gcKO	WT	OK	41.913	46.1131	0.908917	-0.137778	0.390198	0.50835	0.705347	no
1283	XLOC_000477	Ddx59	chr1:138308492-138336797	gcKO	WT	OK	6.72071	6.0439	1.11198	0.153134	-0.330341	0.56505	0.74741	no
1284	XLOC_011732	Trap1	chr16:4037144-4077847	gcKO	WT	OK	42.6628	62.4311	0.683358	-0.549285	1.45229	0.009	0.0489245	yes
1285	XLOC_013624	Cdc42ep3	chr17:79732996-79756038	gcKO	WT	OK	62.0753	69.3899	0.894587	-0.160705	0.457042	0.47315	0.680846	no
1286	XLOC_004618	Ddx56	chr11:6157547-6167732	gcKO	WT	OK	8.96068	11.0389	0.811737	-0.300917	0.78225	0.17275	0.383177	no
1287	XLOC_019649	Chd1l	chr3:97364469-97414120	gcKO	WT	OK	32.2674	46.3368	0.696367	-0.522081	1.36455	0.01305	0.0649019	no
1288	XLOC_005322	Slc25a39	chr11:102264294-102268831	gcKO	WT	OK	298.331	300.911	0.991426	-0.0124246	0.0321388	0.9579	0.978188	no
1289	XLOC_003810	3010026O09Rik	chr11:49988352-50024349	gcKO	WT	OK	13.9921	19.9438	0.701576	-0.511332	0.624738	0.36095	0.584143	no
1290	XLOC_000786	Fam135a	chr1:24017596-24107180	gcKO	WT	OK	19.4321	24.8717	0.781294	-0.356069	1.01759	0.09015	0.25866	no
1291	XLOC_016115	Fam166a	chr2:25070889-25080222	gcKO	WT	OK	95.3716	124.887	0.763663	-0.388995	0.24854	0.7057	0.841987	no
1292	XLOC_020658	Pomgnt1	chr4:115796688-115832450	gcKO	WT	OK	47.9467	58.3712	0.82141	-0.283826	0.715171	0.19615	0.411224	no
1293	XLOC_005014	Rpa1	chr11:75113760-75161885	gcKO	WT	OK	54.8927	73.3839	0.748021	-0.418849	0.925941	0.0972	0.271931	no
1294	XLOC_005022	Vps53	chr11:75859726-75993132	gcKO	WT	OK	10.6382	14.132	0.752774	-0.409712	1.02479	0.0687	0.215637	no
1295	XLOC_011368	Ubn1	chr16:5008821-5086381	gcKO	WT	OK	14.3609	15.4897	0.927126	-0.109167	0.178217	0.7499	0.867847	no
1296	XLOC_018725	Lrriq4	chr3:30523188-30571355	gcKO	WT	OK	14.6567	21.4179	0.68432	-0.547256	0.666182	0.2351	0.455126	no
1297	XLOC_031636	Aph1c	chr9:66662800-66682513	gcKO	WT	OK	2.34664	1.79421	1.3079	0.387249	-0.784786	0.16735	0.375778	no
1298	XLOC_006756	Ccdc88c	chr12:102149730-102267314	gcKO	WT	OK	21.4496	25.8399	0.830096	-0.268649	0.740387	0.20825	0.425477	no
1299	XLOC_020866	Mul1	chr4:137990586-137998180	gcKO	WT	OK	22.0381	26.8336	0.821287	-0.284043	0.738929	0.18015	0.392793	no
1300	XLOC_022707	Ankrd13a	chr5:115225115-115255829	gcKO	WT	OK	112.772	141.187	0.798742	-0.324199	0.73603	0.19415	0.41086	no
1301	XLOC_030632	9530077C05Rik	chr9:22135657-22249130	gcKO	WT	OK	32.8751	44.7724	0.734272	-0.445615	0.92649	0.10755	0.289518	no
1302	XLOC_023656	Ints1	chr5:140227212-140266953	gcKO	WT	OK	15.6005	11.4637	1.36086	0.444518	-0.908875	0.1077	0.289518	no
1303	XLOC_006709	Tmed10	chr12:86681561-86715667	gcKO	WT	OK	22.3535	22.4899	0.993935	-0.00877921	0.0240557	0.96745	0.982906	no
1304	XLOC_021432	Wdr65	chr4:118227152-118304520	gcKO	WT	OK	38.1194	63.4813	0.600482	-0.735805	1.73527	0.0031	0.0215354	yes
1305	XLOC_010028	Drosha	chr15:12754569-12865046	gcKO	WT	OK	13.0733	11.5285	1.134	0.181419	-0.48096	0.3973	0.61549	no
1306	XLOC_010300	Ppp6r2	chr15:89041989-89117788	gcKO	WT	OK	18.1295	20.2101	0.897051	-0.156741	0.399045	0.47005	0.678328	no
1307	XLOC_009393	Dhrs1	chr14:56357856-56377261	gcKO	WT	OK	58.6428	70.2631	0.834617	-0.260813	0.409387	0.54425	0.732902	no
1308	XLOC_020672	Tmem53	chr4:116924593-116941185	gcKO	WT	OK	188.702	214.858	0.878264	-0.187275	0.592101	0.38575	0.606006	no
1309	XLOC_007988	Ubqln1	chr13:58277516-58317014	gcKO	WT	OK	22.3116	19.0154	1.17334	0.230631	-0.646079	0.2795	0.503264	no
1310	XLOC_010165	Maf1	chr15:76181723-76184808	gcKO	WT	OK	29.6888	28.6748	1.03536	0.0501369	-0.129211	0.82065	0.910355	no
1311	XLOC_009116	Ubac2	chr14:122276023-122420257	gcKO	WT	OK	38.1721	39.4408	0.967833	-0.0471704	0.129698	0.8367	0.918735	no
1312	XLOC_009604	Ubac2	chr14:122276023-122420257	gcKO	WT	OK	25.916	41.1665	0.629541	-0.667629	1.05896	0.6554	0.809343	no
1313	XLOC_021107	Ubap2	chr4:41141345-41222312	gcKO	WT	OK	29.6687	15.8018	1.87755	0.908855	-2.26976	1e-04	0.00104973	yes
1314	XLOC_008178	Ptcd2	chr13:100089603-100114633	gcKO	WT	OK	11.0802	15.3848	0.720204	-0.473524	1.29373	0.0448	0.158392	no
1315	XLOC_027031	Phkg2	chr7:134716861-134747959	gcKO	WT	OK	193.416	239.886	0.806283	-0.310646	0.478736	0.45965	0.66994	no
1316	XLOC_021108	Dcaf12	chr4:41238330-41264103	gcKO	WT	OK	32.4242	43.4211	0.746738	-0.421327	1.10622	0.04445	0.157421	no
1317	XLOC_031928	Zdhhc3	chr9:122977565-123022323	gcKO	WT	OK	3.89586	3.80028	1.02515	0.0358366	-0.0730919	0.89865	0.949568	no
1318	XLOC_008009	Isca1	chr13:59856684-59871150	gcKO	WT	OK	59.1403	83.1166	0.711534	-0.490996	1.3556	0.01705	0.0776602	no
1319	XLOC_023343	Sec31a	chr5:100790664-100845293	gcKO	WT	OK	28.4722	26.082	1.09164	0.126502	-0.324958	0.55345	0.73915	no
1320	XLOC_027126	Odf3	chr7:148021394-148036970	gcKO	WT	OK	122.141	147.547	0.827811	-0.272624	0.693462	0.2361	0.456183	no
1321	XLOC_021086	1700003M02Rik	chr4:34635822-34677489	gcKO	WT	OK	234.238	381.553	0.613907	-0.70391	1.71668	0.00245	0.0176041	yes
1322	XLOC_011981	Ccdc54	chr16:50589745-50654279	gcKO	WT	OK	92.0337	151.877	0.605975	-0.722668	1.70853	0.0029	0.0203543	yes
1323	XLOC_027931	Lrrc51	chr7:109061327-109166669	gcKO	WT	OK	228.863	336.406	0.680318	-0.555718	1.41402	0.0501	0.172092	no
1324	XLOC_000987	Wdfy1	chr1:79694964-79758375	gcKO	WT	OK	61.3452	75.7618	0.809711	-0.304521	0.60964	0.29855	0.522837	no
1325	XLOC_015518	1700017D01Rik	chr19:11171295-11205368	gcKO	WT	OK	93.3789	124.892	0.747677	-0.419516	1.20204	0.0422	0.15185	no
1326	XLOC_004305	Zpbp2	chr11:98412410-98420011	gcKO	WT	OK	83.0974	161.556	0.514357	-0.959162	2.64601	5e-05	0.000597811	yes
1327	XLOC_020856	1700013G24Rik	chr4:137009210-137011376	gcKO	WT	OK	107.649	103.237	1.04274	0.0603808	-0.185731	0.79215	0.892924	no
1328	XLOC_030876	Ubl7	chr9:57758792-57777778	gcKO	WT	OK	149.002	169.083	0.881236	-0.182401	0.453808	0.40205	0.619487	no
1329	XLOC_008764	Bap1	chr14:32064659-32073160	gcKO	WT	OK	26.7346	43.0176	0.621481	-0.686217	1.82255	0.00105	0.00874246	yes
1330	XLOC_031019	Rwdd2a	chr9:86465594-86468506	gcKO	WT	OK	23.7595	44.9019	0.529142	-0.918274	2.40158	0.00015	0.00153046	yes
1331	XLOC_029997	1700030J22Rik	chr8:119493222-119502945	gcKO	WT	OK	83.8734	105.651	0.793872	-0.333014	0.830391	0.1243	0.31315	no
1332	XLOC_011547	Wdr5b	chr16:36041275-36092204	gcKO	WT	OK	1.61665	2.09678	0.771016	-0.375167	0.320795	0.6128	0.781358	no
1333	XLOC_007557	Fastkd3	chr13:68721124-68731212	gcKO	WT	OK	2.32331	3.14358	0.739065	-0.43623	0.72042	0.1965	0.411477	no
1334	XLOC_031456	Arhgef12	chr9:42771924-42913965	gcKO	WT	OK	7.33758	4.66631	1.57246	0.653021	-1.6745	0.00295	0.0206303	yes
1335	XLOC_002536	Dctn2	chr10:126703317-126725827	gcKO	WT	OK	155.136	177.937	0.871859	-0.197829	0.548979	0.3879	0.608129	no
1336	XLOC_027099	Lrrc27	chr7:146289536-146429064	gcKO	WT	OK	184.889	302.611	0.610979	-0.710804	1.70985	0.00215	0.0158103	yes
1337	XLOC_029844	Rnaseh2a	chr8:87480508-87493491	gcKO	WT	OK	170.327	262.465	0.648951	-0.623819	1.49272	0.0091	0.04934	yes
1338	XLOC_020954	Casz1	chr4:148178500-148329001	gcKO	WT	OK	2.22331	2.53819	0.875943	-0.19109	0.391542	0.48895	0.690917	no
1339	XLOC_021709	Casz1	chr4:148178500-148329001	gcKO	WT	OK	1.81217	4.63659	0.390841	-1.35535	0.608656	0.19525	0.41086	no
1340	XLOC_026744	Ints4	chr7:104629304-104689910	gcKO	WT	OK	18.2873	22.2903	0.820415	-0.285571	0.760035	0.1766	0.387983	no
1341	XLOC_005451	Rnf157	chr11:116197365-116274346	gcKO	WT	OK	4.06161	2.91976	1.39108	0.476203	-1.06167	0.0532	0.17967	no
1342	XLOC_027616	Zfp715	chr7:50551564-50568631	gcKO	WT	OK	5.13914	7.92877	0.648164	-0.62557	1.48737	0.0121	0.0610345	no
1343	XLOC_019858	Dnajb4	chr3:151846874-151899794	gcKO	WT	OK	29.5297	46.1479	0.639893	-0.6441	1.53594	0.0236	0.0989042	no
1344	XLOC_010292	Zdhhc25	chr15:88349355-88432260	gcKO	WT	OK	29.6007	37.816	0.782756	-0.353366	0.844763	0.12145	0.308788	no
1345	XLOC_022406	Afap1	chr5:36235967-36346574	gcKO	WT	OK	7.579	11.63	0.651677	-0.617772	1.62239	0.00365	0.0243463	yes
1346	XLOC_018913	Gon4l	chr3:88639152-88717872	gcKO	WT	OK	7.49893	8.14184	0.921036	-0.118671	0.176113	0.7455	0.865346	no
1347	XLOC_031700	Ube2cbp	chr9:86200840-86358523	gcKO	WT	OK	1.41895	1.30867	1.08427	0.116729	-0.128236	0.84315	0.921887	no
1348	XLOC_000286	Armc9	chr1:88051350-88174859	gcKO	WT	OK	19.2681	34.4712	0.558962	-0.839179	2.08312	0.00025	0.00244834	yes
1349	XLOC_009165	Ecd	chr14:21139080-21202714	gcKO	WT	OK	24.2713	24.9881	0.971314	-0.0419888	0.101173	0.8702	0.935043	no
1350	XLOC_024456	Zfp398	chr6:47769258-47819529	gcKO	WT	OK	3.06437	2.84785	1.07603	0.105721	-0.183139	0.7423	0.863627	no
1351	XLOC_029116	Sugp1	chr8:72537454-72596245	gcKO	WT	OK	36.9906	52.0771	0.710305	-0.493491	0.889575	0.13125	0.324924	no
1352	XLOC_029793	Med26	chr8:75018371-75072209	gcKO	WT	OK	24.9118	22.1675	1.1238	0.168384	-0.448107	0.43005	0.64387	no
1353	XLOC_030799	Sik3	chr9:45820902-46032277	gcKO	WT	OK	14.1172	12.4945	1.12987	0.176158	-0.404668	0.47155	0.679478	no
1354	XLOC_024380	Nup205	chr6:35127598-35197638	gcKO	WT	OK	77.9292	101.327	0.769086	-0.378784	0.779582	0.1467	0.348341	no
1355	XLOC_025147	4921507P07Rik	chr6:50516641-50546589	gcKO	WT	OK	85.8903	142.642	0.602139	-0.731831	1.99327	0.00105	0.00874246	yes
1356	XLOC_002098	Slc22a16	chr10:40290135-40323941	gcKO	WT	OK	106.51	123.974	0.859132	-0.219041	0.543183	0.3216	0.546663	no
1357	XLOC_009523	Lrrc63	chr14:75484107-75530690	gcKO	WT	OK	35.7881	36.9712	0.967999	-0.0469252	0.129359	0.8321	0.916368	no
1358	XLOC_026926	Micalcl	chr7:119511821-119556625	gcKO	WT	OK	51.0975	71.775	0.711912	-0.490229	1.22292	0.0201	0.0873063	no
1359	XLOC_005997	Nt5c1b	chr12:10376725-10396983	gcKO	WT	OK	367.008	554.737	0.661589	-0.595993	0.763088	0.1473	0.349205	no
1360	XLOC_029105	Ints10	chr8:71317852-71351701	gcKO	WT	OK	54.8892	86.2728	0.636228	-0.652384	1.78563	0.00215	0.0158103	yes
1361	XLOC_019246	Ttll7	chr3:146515229-146647358	gcKO	WT	OK	20.6143	33.9178	0.607772	-0.718396	1.87623	0.00095	0.00806216	yes
1362	XLOC_022644	Lpcat2b	chr5:107860567-107864058	gcKO	WT	OK	67.4461	95.6651	0.705023	-0.504258	1.41102	0.01895	0.0843267	no
1363	XLOC_022484	Nsun7	chr5:66651107-66689271	gcKO	WT	OK	44.0667	66.0522	0.66715	-0.583918	1.58408	0.00645	0.0379536	yes
1364	XLOC_003117	Usp15	chr10:122549932-122634032	gcKO	WT	OK	61.3883	90.3232	0.679652	-0.557132	1.51869	0.0089	0.0485384	yes
1365	XLOC_006129	Wdr20b	chr12:66326503-66329441	gcKO	WT	OK	29.8196	54.1338	0.55085	-0.860269	2.55416	5e-05	0.000597811	yes
1366	XLOC_027989	4931431F19Rik	chr7:111276426-111278337	gcKO	WT	OK	28.2217	32.3817	0.871532	-0.198372	0.563084	0.3626	0.585493	no
1367	XLOC_029902	Prss54	chr8:98082868-98101840	gcKO	WT	OK	48.7569	72.0599	0.676616	-0.56359	1.5827	0.00845	0.0465491	yes
1368	XLOC_018113	Zbtb46	chr2:181125482-181229971	gcKO	WT	OK	5.26175	6.41789	0.819857	-0.286556	0.326227	0.57095	0.751494	no
1369	XLOC_003944	Tekt3	chr11:62875160-62908462	gcKO	WT	OK	81.7921	114.627	0.71355	-0.48692	1.52056	0.02045	0.0880988	no
1370	XLOC_001112	Zranb3	chr1:129850762-129999722	gcKO	WT	OK	8.46151	11.7335	0.721141	-0.471646	0.999599	0.0765	0.232452	no
1371	XLOC_014098	Cabyr	chr18:12899863-12913651	gcKO	WT	OK	102.509	130.483	0.785612	-0.348109	0.851778	0.11705	0.302406	no
1372	XLOC_002380	Rfx4	chr10:84218792-84369283	gcKO	WT	OK	25.3929	33.6177	0.755343	-0.404792	1.00886	0.07695	0.233368	no
1373	XLOC_007578	Zdhhc11	chr13:74100752-74130459	gcKO	WT	OK	14.0421	21.4967	0.653221	-0.614354	1.43231	0.00975	0.0517801	no
1374	XLOC_006008	Nbas	chr12:13275918-13590629	gcKO	WT	OK	33.2765	39.0264	0.852666	-0.229947	0.461963	0.41075	0.626627	no
1375	XLOC_010434	Nipbl	chr15:8240598-8415407	gcKO	WT	OK	55.5209	78.2104	0.709892	-0.494329	0.111095	0.19055	0.406438	no
1376	XLOC_014627	Katnal2	chr18:77215891-77286566	gcKO	WT	OK	37.526	33.2471	1.1287	0.174664	-0.155325	0.7145	0.846695	no
1377	XLOC_003021	Nudt4	chr10:95009639-95026801	gcKO	WT	OK	176.571	251.982	0.700729	-0.513073	1.40601	0.02805	0.112433	no
1378	XLOC_014348	Dym	chr18:75178425-75446623	gcKO	WT	OK	20.2556	19.3091	1.04902	0.0690425	-0.165176	0.77315	0.882235	no
1379	XLOC_002442	Poc1b	chr10:98569804-98660773	gcKO	WT	OK	18.9659	27.7499	0.683458	-0.549076	1.54943	0.0119	0.0602677	no
1380	XLOC_017116	Taf3	chr2:9836178-9970236	gcKO	WT	OK	4.58285	2.96217	1.54713	0.62959	-1.49858	0.0102	0.0536482	no
1381	XLOC_013550	Rfx2	chr17:56915319-56970431	gcKO	WT	OK	57.2033	57.8393	0.989004	-0.0159507	0.0406809	0.94415	0.972209	no
1382	XLOC_026948	9030624J02Rik	chr7:125883784-125985143	gcKO	WT	OK	11.8932	9.85735	1.20653	0.270869	-0.665609	0.22025	0.440465	no
1383	XLOC_002758	Mcm9	chr10:53256871-53350245	gcKO	WT	OK	6.38891	5.32786	1.19915	0.262013	-0.383917	0.5012	0.700534	no
1384	XLOC_026269	Ceacam20	chr7:20550760-20576460	gcKO	WT	OK	1.44398	1.2235	1.1802	0.239031	-0.272539	0.6077	0.77742	no
1385	XLOC_014962	Acy3	chr19:3986559-3990005	gcKO	WT	OK	1.4119	1.53553	0.919487	-0.121096	0.10946	0.84325	0.921887	no
1386	XLOC_024681	Slc41a3	chr6:90552006-90596507	gcKO	WT	OK	21.017	21.7206	0.967607	-0.047511	0.117234	0.83345	0.91708	no
1387	XLOC_025340	Slc41a3	chr6:90552006-90596507	gcKO	WT	OK	12.2038	14.9106	0.818465	-0.289001	0.34796	0.7293	0.855956	no
1388	XLOC_021706	Ubiad1	chr4:147808605-147818860	gcKO	WT	OK	5.84292	3.76913	1.5502	0.632458	-1.30482	0.0158	0.0743112	no
1389	XLOC_027305	Dhx34	chr7:16782569-16807381	gcKO	WT	OK	11.0827	10.0712	1.10043	0.138078	-0.356228	0.5276	0.720945	no
1390	XLOC_000956	Tns1	chr1:73956804-74171021	gcKO	WT	OK	61.9113	62.722	0.987075	-0.0187703	0.0436754	0.93595	0.968103	no
1391	XLOC_031470	Vps11	chr9:44156187-44169753	gcKO	WT	OK	19.2405	16.283	1.18163	0.240776	-0.679299	0.26495	0.487999	no
1392	XLOC_023606	Lrwd1	chr5:136598935-136617506	gcKO	WT	OK	114.974	134.677	0.853702	-0.228194	0.629921	0.31115	0.535862	no
1393	XLOC_023111	Gtf3c2	chr5:31458088-31482517	gcKO	WT	OK	14.0711	15.5791	0.903204	-0.146878	0.384505	0.4907	0.692144	no
1394	XLOC_031467	C2cd2l	chr9:44117319-44128365	gcKO	WT	OK	2.41744	3.04506	0.793889	-0.332988	0.722509	0.203	0.418942	no
1395	XLOC_004168	Ap2b1	chr11:83105200-83218542	gcKO	WT	OK	81.1351	107.377	0.75561	-0.404291	0.93752	0.09625	0.270296	no
1396	XLOC_031775	1300017J02Rik	chr9:103152859-103207471	gcKO	WT	OK	12.3387	10.6185	1.162	0.216617	-0.535008	0.3525	0.57581	no
1397	XLOC_019622	Tars2	chr3:95543894-95558900	gcKO	WT	OK	40.5047	22.5741	1.7943	0.84342	-1.82038	0.04	0.146238	no
1398	XLOC_012952	Ranbp3	chr17:56812647-56851192	gcKO	WT	OK	59.9549	65.7519	0.911835	-0.133155	0.351676	0.5252	0.719201	no
1399	XLOC_019340	Lrrc34	chr3:30523188-30571355	gcKO	WT	OK	81.9913	136.612	0.600176	-0.736543	1.89675	0.0026	0.0185493	yes
1400	XLOC_031265	Ddi1	chr9:6168611-6377519	gcKO	WT	OK	96.2575	115.098	0.836309	-0.257888	0.663909	0.23295	0.452253	no
1401	XLOC_003030	Csl	chr10:99218998-99222360	gcKO	WT	OK	78.551	99.8472	0.786712	-0.346091	0.914066	0.1084	0.289518	no
1402	XLOC_009226	Phf7	chr14:32050881-32064404	gcKO	WT	OK	395.46	588.305	0.672202	-0.573032	1.48133	0.0204	0.0879437	no
1403	XLOC_029424	Osgin1	chr8:121942772-121970162	gcKO	WT	OK	34.8138	39.1493	0.889257	-0.16933	0.42532	0.4306	0.644387	no
1404	XLOC_012630	Tekt4	chr17:25608534-25613539	gcKO	WT	OK	123.022	166.044	0.7409	-0.432648	1.32534	0.04285	0.153551	no
1405	XLOC_033324	1700008I05Rik	chrX:132189236-132228329	gcKO	WT	OK	17.0748	17.9205	0.952808	-0.0697412	0.203218	0.7559	0.871738	no
1406	XLOC_000821	Fam178b	chr1:36619072-36740028	gcKO	WT	OK	162.42	202.168	0.803391	-0.315822	0.737361	0.20345	0.41956	no
1407	XLOC_029939	Dpep3	chr8:108497164-108503395	gcKO	WT	OK	152.657	159.903	0.954685	-0.0669011	0.165859	0.7614	0.875108	no
1408	XLOC_018728	Gpr160	chr3:30754854-30796117	gcKO	WT	OK	71.2454	84.183	0.846316	-0.240732	0.530141	0.3348	0.559597	no
1409	XLOC_000289	1700019O17Rik	chr1:88322621-88325075	gcKO	WT	OK	38.0138	52.8691	0.719017	-0.475903	1.2485	0.02695	0.109191	no
1410	XLOC_022526	1700023E05Rik	chr5:77430500-77491123	gcKO	WT	OK	70.8725	114.877	0.616942	-0.696797	1.56021	0.00495	0.0307478	yes
1411	XLOC_029051	Mlf1ip	chr8:47637383-47702554	gcKO	WT	OK	15.0919	23.9872	0.629165	-0.668493	1.24818	0.03515	0.132917	no
1412	XLOC_000044	Efhc1	chr1:20941702-20982198	gcKO	WT	OK	110.268	154.346	0.714421	-0.485151	1.25797	0.0247	0.102134	no
1413	XLOC_005492	2310003H01Rik	chr11:120230875-120240060	gcKO	WT	OK	22.9006	23.6188	0.969592	-0.0445548	0.122042	0.8369	0.918824	no
1414	XLOC_019079	Ppm1j	chr3:104570322-104589045	gcKO	WT	OK	58.4109	81.86	0.713546	-0.486921	1.22552	0.02555	0.104718	no
1415	XLOC_020946	Mad2l2	chr4:147513953-147526244	gcKO	WT	OK	109.492	120.976	0.905072	-0.143898	0.399698	0.53165	0.723263	no
1416	XLOC_003094	Cand1	chr10:118635867-118677111	gcKO	WT	OK	26.8066	34.7878	0.770575	-0.375993	1.02823	0.07535	0.230379	no
1417	XLOC_004479	2310067B10Rik	chr11:115626746-115660443	gcKO	WT	OK	12.7366	14.298	0.890796	-0.166831	0.419041	0.4328	0.646216	no
1418	XLOC_004337	Nkiras2	chr11:100444112-100512007	gcKO	WT	OK	25.6621	36.4571	0.703899	-0.506563	0.542535	0.30735	0.532274	no
1419	XLOC_016965	Zswim1	chr2:164648155-164654034	gcKO	WT	OK	8.39037	7.98963	1.05016	0.0706051	-0.10011	0.8558	0.928098	no
1420	XLOC_028297	1600016N20Rik	chr7:148379910-148401117	gcKO	WT	OK	61.761	81.8691	0.754387	-0.406623	0.669607	0.22225	0.442702	no
1421	XLOC_016623	Zfyve19	chr2:118998235-119042786	gcKO	WT	OK	16.2024	16.7772	0.965739	-0.0502952	0.103709	0.8548	0.927544	no
1422	XLOC_012041	Zfp654	chr16:64780172-64859317	gcKO	WT	OK	38.267	58.5193	0.653921	-0.612812	1.66214	0.0106	0.055335	no
1423	XLOC_014957	1810055G02Rik	chr19:3708331-3717986	gcKO	WT	OK	53.4214	41.8966	1.27508	0.350583	-0.916802	0.10885	0.289652	no
1424	XLOC_007531	2010111I01Rik	chr13:63066271-63404228	gcKO	WT	OK	8.23078	6.22572	1.32206	0.402789	-0.948915	0.10965	0.290519	no
1425	XLOC_011707	Chaf1b	chr16:93884145-93906351	gcKO	WT	OK	4.2585	9.35075	0.455418	-1.13474	2.5541	0.00025	0.00244834	yes
1426	XLOC_031648	Gcnt3	chr9:69879302-69888539	gcKO	WT	OK	3.31267	5.67757	0.583466	-0.777278	1.86825	0.00185	0.0140526	yes
1427	XLOC_000147	Osgepl1	chr1:53370506-53383155	gcKO	WT	OK	15.0251	16.6304	0.903472	-0.146449	0.380936	0.5211	0.715928	no
1428	XLOC_005358	Strada	chr11:106024287-106054956	gcKO	WT	OK	33.8767	29.9228	1.13214	0.179049	-0.465856	0.4073	0.624131	no
1429	XLOC_029414	Cenpn	chr8:119445639-119465403	gcKO	WT	OK	49.9544	74.8087	0.667762	-0.582594	1.70987	0.005	0.0310047	yes
1430	XLOC_030040	Dbndd1	chr8:126028568-126042688	gcKO	WT	OK	20.4411	21.7013	0.94193	-0.0863083	0.1969	0.72295	0.852225	no
1431	XLOC_015661	Mms19	chr19:42007961-42055901	gcKO	WT	OK	7.86592	9.36904	0.839565	-0.252286	0.515402	0.3338	0.558371	no
1432	XLOC_013512	Tbc1d5	chr17:50872451-51318699	gcKO	WT	OK	18.065	19.7688	0.913814	-0.130035	0.317198	0.59805	0.770332	no
1433	XLOC_029173	1700030K09Rik	chr8:74948081-74999132	gcKO	WT	OK	20.6434	25.5333	0.808489	-0.306697	0.386577	0.50145	0.700658	no
1434	XLOC_008100	Nkd2	chr13:73956775-73985079	gcKO	WT	OK	2.09971	1.38357	1.5176	0.601791	-1.02958	0.0928	0.263793	no
1435	XLOC_023240	Fryl	chr5:73411429-73647857	gcKO	WT	OK	5.65463	4.49116	1.25906	0.332345	-0.87827	0.118	0.303674	no
1436	XLOC_012884	Xpo5	chr17:46339700-46380547	gcKO	WT	OK	14.8383	24.4834	0.606056	-0.722477	1.77103	0.0023	0.0167128	yes
1437	XLOC_005206	Plxdc1	chr11:97780150-97850377	gcKO	WT	OK	25.557	26.6851	0.957725	-0.0623183	0.158096	0.7693	0.8796	no
1438	XLOC_010144	Psca	chr15:74545268-74547495	gcKO	WT	OK	0.837836	2.23663	0.374597	-1.41659	1.1906	0.1243	0.31315	no
1439	XLOC_022765	Brap	chr5:122110594-122137373	gcKO	WT	OK	65.7453	94.2343	0.697679	-0.519366	1.34447	0.01645	0.0763707	no
1440	XLOC_022330	Rbm33	chr5:28643492-28745782	gcKO	WT	OK	6.38761	6.0598	1.0541	0.0760055	-0.197837	0.72665	0.854562	no
1441	XLOC_031294	Naalad2	chr9:18127025-18201843	gcKO	WT	OK	8.84218	8.19038	1.07958	0.11047	-0.277791	0.63665	0.79609	no
1442	XLOC_022984	Pan3	chr5:148242039-148360078	gcKO	WT	OK	35.2655	31.5206	1.11881	0.161964	-0.389138	0.49765	0.697754	no
1443	XLOC_020481	Zfp618	chr4:62626607-62795203	gcKO	WT	OK	8.21884	9.53552	0.861918	-0.214377	0.340642	0.50545	0.703079	no
1444	XLOC_019131	Sass6	chr3:116265890-116333902	gcKO	WT	OK	12.4141	19.4108	0.639546	-0.644877	1.70774	0.00495	0.0307478	yes
1445	XLOC_006282	Tdp1	chr12:100955740-101194047	gcKO	WT	OK	35.0757	43.8607	0.799707	-0.322455	0.788053	0.15245	0.35627	no
1446	XLOC_010634	Puf60	chr15:75900452-75911376	gcKO	WT	OK	46.9512	63.2883	0.741862	-0.430776	1.18538	0.038	0.140625	no
1447	XLOC_023680	Zdhhc4	chr5:144078153-144090964	gcKO	WT	OK	56.2896	47.1498	1.19385	0.255616	-0.632914	0.25055	0.47127	no
1448	XLOC_031917	Ccdc13	chr9:121706213-121748605	gcKO	WT	OK	58.8258	76.5208	0.768756	-0.379402	1.01588	0.06955	0.217219	no
1449	XLOC_016218	Ciz1	chr2:32218484-32233932	gcKO	WT	OK	28.035	31.1464	0.900104	-0.151835	0.399521	0.47475	0.681859	no
1450	XLOC_014268	Prrc1	chr18:57514386-57552399	gcKO	WT	OK	2.36798	2.39628	0.98819	-0.0171422	0.0355984	0.94685	0.973752	no
1451	XLOC_003866	Larp1	chr11:57822565-57875716	gcKO	WT	OK	84.6211	118.914	0.711616	-0.490827	0.913774	0.1015	0.279386	no
1452	XLOC_019555	Ubap2l	chr3:89799375-89856527	gcKO	WT	OK	35.9976	37.4197	0.961996	-0.0558966	0.123661	0.82645	0.91347	no
1453	XLOC_025636	1700034J05Rik	chr6:146837015-146980545	gcKO	WT	OK	96.8828	114.472	0.846345	-0.240688	0.549304	0.3121	0.536726	no
1454	XLOC_021750	Actrt2	chr4:154040536-154041976	gcKO	WT	OK	229.653	380.361	0.603776	-0.727914	2.10377	0.0014	0.0111715	yes
1455	XLOC_032510	Actrt1	chrX:43682135-43683525	gcKO	WT	OK	12.3171	14.2306	0.865536	-0.208328	0.471635	0.4038	0.620965	no
1456	XLOC_016340	Phospho2	chr2:69627793-69635225	gcKO	WT	OK	126.516	191.994	0.658958	-0.601743	1.86766	0.0048	0.0301214	yes
1457	XLOC_005145	Kif2b	chr11:91436599-91438869	gcKO	WT	OK	183.901	273.622	0.672099	-0.573251	1.57323	0.0111	0.0573965	no
1458	XLOC_025090	1700074P13Rik	chr6:40870452-40891025	gcKO	WT	OK	107.145	138.844	0.771693	-0.373899	1.04247	0.0768	0.233025	no
1459	XLOC_003664	Zmiz2	chr11:6289366-6306310	gcKO	WT	OK	15.029	10.5573	1.42356	0.509518	-1.28429	0.02375	0.0990701	no
1460	XLOC_030865	Man2c1	chr9:56978583-56990017	gcKO	WT	OK	35.9876	36.1569	0.995318	-0.00677278	0.00818059	0.9867	0.99228	no
1461	XLOC_033292	Satl1	chrX:109497913-109520388	gcKO	WT	OK	8.60054	9.11496	0.943563	-0.0838086	0.245643	0.72875	0.855726	no
1462	XLOC_002507	Irak3	chr10:119577712-119638593	gcKO	WT	OK	4.29248	1.92557	2.2292	1.15653	-0.589509	0.31455	0.539278	no
1463	XLOC_003097	Irak3	chr10:119577712-119638593	gcKO	WT	OK	10.9942	15.6728	0.701483	-0.511529	1.25149	0.02985	0.117732	no
1464	XLOC_000889	Rftn2	chr1:55227003-55293940	gcKO	WT	OK	7.00405	9.55759	0.732826	-0.448457	1.13595	0.05195	0.176731	no
1465	XLOC_031216	Ttc21a	chr9:119846723-119878662	gcKO	WT	OK	52.1878	71.346	0.731475	-0.451121	1.20965	0.03805	0.140706	no
1466	XLOC_012693	Ftsjd2	chr17:29797539-29853962	gcKO	WT	OK	18.3848	16.7353	1.09856	0.135614	-0.344718	0.54295	0.731858	no
1467	XLOC_020740	Stk40	chr4:125781200-125818381	gcKO	WT	OK	14.786	13.0294	1.13482	0.182454	-0.461053	0.3976	0.615841	no
1468	XLOC_029301	Katnb1	chr8:97604803-97666440	gcKO	WT	OK	59.7376	72.9222	0.819196	-0.287718	0.660796	0.2651	0.488005	no
1469	XLOC_028164	Xpo6	chr7:133245228-133344049	gcKO	WT	OK	58.3456	52.3522	1.11448	0.156372	-0.398326	0.4666	0.675406	no
1470	XLOC_031567	1700017B05Rik	chr9:57100109-57114799	gcKO	WT	OK	23.3598	17.948	1.30153	0.380201	-1.02241	0.08025	0.2399	no
1471	XLOC_000043	Paqr8	chr1:20880702-20929774	gcKO	WT	OK	8.67762	8.92865	0.971885	-0.0411418	0.105758	0.8534	0.926957	no
1472	XLOC_023664	Iqce	chr5:141138808-141178630	gcKO	WT	OK	19.5128	23.801	0.819831	-0.286601	0.742229	0.17495	0.385673	no
1473	XLOC_024742	Atg7	chr6:114593118-114871820	gcKO	WT	OK	12.739	18.7572	0.679153	-0.558191	1.39804	0.0203	0.0876329	no
1474	XLOC_016201	Usp20	chr2:30828352-30879106	gcKO	WT	OK	23.8491	31.7089	0.752126	-0.410957	0.957269	0.0881	0.254962	no
1475	XLOC_033056	1700080O16Rik	chrX:49321811-49326653	gcKO	WT	OK	10.9336	20.2387	0.540232	-0.888354	1.9477	7e-04	0.00618284	yes
1476	XLOC_031582	Tbc1d21	chr9:58207459-58218266	gcKO	WT	OK	78.9656	135.283	0.583707	-0.776685	1.9695	0.00045	0.00416661	yes
1477	XLOC_004595	Mtmr3	chr11:4380780-4494818	gcKO	WT	OK	18.5047	19.0568	0.971029	-0.0424124	0.111998	0.84115	0.920939	no
1478	XLOC_030649	Snx19	chr9:30234571-30274311	gcKO	WT	OK	13.364	15.4498	0.864995	-0.209237	0.541124	0.31965	0.54438	no
1479	XLOC_006824	Xrcc3	chr12:112997059-113052052	gcKO	WT	OK	3.14541	1.94483	1.61732	0.693599	-0.716112	0.22875	0.449131	no
1480	XLOC_030007	4632415K11Rik	chr8:122284486-122302316	gcKO	WT	OK	4.31773	3.89121	1.10961	0.150054	-0.321627	0.59095	0.76549	no
1481	XLOC_019053	Spag17	chr3:99689280-99966326	gcKO	WT	OK	30.6695	42.9847	0.713498	-0.48702	1.28354	0.03015	0.118505	no
1482	XLOC_010244	Mei1	chr15:81900546-81957244	gcKO	WT	OK	4.40474	3.06308	1.43801	0.524076	-1.10186	0.0406	0.147872	no
1483	XLOC_023431	Myo18b	chr5:113117849-113325382	gcKO	WT	OK	23.234	34.0614	0.682121	-0.551901	1.11224	0.05395	0.181471	no
1484	XLOC_012121	4932438H23Rik	chr16:91054179-91069720	gcKO	WT	OK	4.92875	6.76676	0.728377	-0.457244	0.990654	0.0684	0.214964	no
1485	XLOC_030918	Dpp8	chr9:64879913-64932311	gcKO	WT	OK	24.3936	33.6223	0.725518	-0.462916	1.25758	0.02955	0.116823	no
1486	XLOC_029490	4933403G14Rik	chr8:128193717-128197265	gcKO	WT	OK	9.82902	12.4652	0.788517	-0.342792	0.96044	0.1212	0.308402	no
1487	XLOC_026503	Zfp819	chr7:50862538-50873649	gcKO	WT	OK	3.51157	6.05335	0.580104	-0.785617	1.75274	0.00435	0.0278613	yes
1488	XLOC_004335	Ttc25	chr11:100406945-100433880	gcKO	WT	OK	56.7397	97.5131	0.581867	-0.781238	2.23548	5e-04	0.00457226	yes
1489	XLOC_016182	Gle1	chr2:29790928-29814952	gcKO	WT	OK	6.60681	8.02597	0.823179	-0.280722	0.655065	0.22925	0.449131	no
1490	XLOC_019643	Polr3c	chr3:96515817-96531362	gcKO	WT	OK	16.0156	22.9815	0.696891	-0.520991	1.45025	0.01975	0.0869776	no
1491	XLOC_029095	Tktl2	chr8:69035638-69043098	gcKO	WT	OK	27.1903	34.1558	0.796067	-0.329039	0.7192	0.2242	0.444437	no
1492	XLOC_026946	Tmc5	chr7:125740810-125818599	gcKO	WT	OK	23.3938	30.3685	0.770331	-0.37645	0.958478	0.07035	0.218956	no
1493	XLOC_009140	4930452B06Rik	chr14:9263685-9505892	gcKO	WT	OK	5.97428	5.85998	1.01951	0.0278702	-0.0453889	0.94205	0.971122	no
1494	XLOC_019272	Lrriq3	chr3:154756397-154857268	gcKO	WT	OK	42.2147	59.1948	0.713149	-0.487726	1.32699	0.0277	0.11135	no
1495	XLOC_019799	Sgms2	chr3:131021903-131047841	gcKO	WT	OK	13.597	16.0001	0.849807	-0.234798	0.631864	0.2687	0.492071	no
1496	XLOC_032752	Arl13a	chrX:130722039-130742569	gcKO	WT	OK	11.3997	13.8842	0.821056	-0.284443	0.80417	0.23365	0.453017	no
1497	XLOC_026972	4933427G17Rik	chr7:128100549-128158303	gcKO	WT	OK	38.5601	45.6427	0.844825	-0.243275	0.44953	0.4085	0.62494	no
1498	XLOC_008102	Cep72	chr13:74173794-74199759	gcKO	WT	OK	74.3086	95.3765	0.779108	-0.360105	0.912677	0.1032	0.282579	no
1499	XLOC_017162	4933433C11Rik	chr2:25068078-25070150	gcKO	WT	OK	37.7648	42.7624	0.883131	-0.179301	0.530066	0.40635	0.623321	no
1500	XLOC_006306	Ppp4r4	chr12:104770708-104852049	gcKO	WT	OK	12.6985	20.8064	0.610317	-0.712365	1.93158	0.001	0.00841541	yes
1501	XLOC_024895	8430419L09Rik	chr6:135148004-135186260	gcKO	WT	OK	8.39215	8.94244	0.938463	-0.0916279	0.213332	0.68595	0.828855	no
1502	XLOC_029745	Mau2	chr8:72537454-72596245	gcKO	WT	OK	16.2402	17.5664	0.924504	-0.113253	0.204018	0.73205	0.858061	no
1503	XLOC_015378	Ppp6r3	chr19:3454926-3580613	gcKO	WT	OK	13.9827	18.3103	0.763652	-0.389015	1.0664	0.07815	0.235811	no
1504	XLOC_000974	Glb1l	chr1:75188733-75207397	gcKO	WT	OK	38.5491	50.8607	0.757935	-0.399856	0.977338	0.08565	0.250294	no
1505	XLOC_022307	Abcb8	chr5:23899973-23915930	gcKO	WT	OK	8.49903	7.08996	1.19874	0.261519	-0.618371	0.27215	0.495823	no
1506	XLOC_021721	Spsb1	chr4:149270370-149329115	gcKO	WT	OK	18.54	17.6038	1.05318	0.0747573	-0.192786	0.7389	0.862147	no
1507	XLOC_003908	Lrrc48	chr11:60166881-60207835	gcKO	WT	OK	29.5965	62.1602	0.476133	-1.07056	3.1648	5e-05	0.000597811	yes
1508	XLOC_029225	4930432K21Rik	chr8:86656726-86696803	gcKO	WT	OK	30.9659	37.2282	0.831786	-0.265715	0.55604	0.3194	0.544224	no
1509	XLOC_016846	Ttll9	chr2:152766620-152834218	gcKO	WT	OK	54.2593	93.0109	0.583365	-0.777528	1.25596	0.0285	0.11371	no
1510	XLOC_006183	Fam71d	chr12:79792492-79835507	gcKO	WT	OK	83.7801	139.868	0.598994	-0.739388	1.93516	7e-04	0.00618284	yes
1511	XLOC_022244	4930511M11Rik	chr5:3656793-3844662	gcKO	WT	OK	101.177	129.404	0.781869	-0.355009	0.826502	0.19365	0.410332	no
1512	XLOC_018711	Spata16	chr3:26536504-26882148	gcKO	WT	OK	133.793	174.941	0.764789	-0.386867	1.03774	0.07555	0.230766	no
1513	XLOC_000211	Spag16	chr1:69873543-70771706	gcKO	WT	OK	56.9052	82.9635	0.685906	-0.543917	1.4234	0.01395	0.0675972	no
1514	XLOC_017778	Usp50	chr2:126586785-126609220	gcKO	WT	OK	44.2593	60.2942	0.734056	-0.44604	1.17965	0.03205	0.123918	no
1515	XLOC_002408	Uhrf1bp1l	chr10:89207732-89282646	gcKO	WT	OK	27.1568	24.9842	1.08696	0.120299	-0.296341	0.60905	0.778275	no
1516	XLOC_031577	Ccdc33	chr9:57876479-57966630	gcKO	WT	OK	30.322	44.2797	0.684783	-0.546282	1.4154	0.01115	0.0576076	no
1517	XLOC_024616	Ankrd53	chr6:83712639-83718436	gcKO	WT	OK	21.5697	39.104	0.551598	-0.858311	2.26685	3e-04	0.00288736	yes
1518	XLOC_012131	4930563D23Rik	chr16:92319007-92321686	gcKO	WT	OK	37.251	72.4965	0.513832	-0.960632	2.82207	5e-05	0.000597811	yes
1519	XLOC_021770	Ttll10	chr4:155408800-155424926	gcKO	WT	OK	116.893	128.839	0.90728	-0.140377	0.349116	0.5307	0.722988	no
1520	XLOC_007471	Secisbp2	chr13:51747033-51779411	gcKO	WT	OK	7.08694	12.6037	0.56229	-0.830612	2.0211	0.00035	0.00331274	yes
1521	XLOC_017959	Tti1	chr2:157807374-157854141	gcKO	WT	OK	10.635	9.87804	1.07663	0.106518	-0.265297	0.63055	0.792208	no
1522	XLOC_003650	Ascc2	chr11:4537686-4585755	gcKO	WT	OK	41.7741	45.9425	0.909269	-0.137222	0.329424	0.5485	0.735903	no
1523	XLOC_017022	1700010B08Rik	chr2:173544915-173547587	gcKO	WT	OK	158.203	184.079	0.85943	-0.218547	0.697639	0.318	0.5426	no
1524	XLOC_006280	Zc3h14	chr12:99985177-100139694	gcKO	WT	OK	95.8885	121.579	0.788693	-0.342462	0.855907	0.15455	0.35841	no
1525	XLOC_023418	Ep400	chr5:111093345-111199736	gcKO	WT	OK	62.0464	74.0686	0.837688	-0.255514	0.519415	0.34385	0.568295	no
1526	XLOC_027003	Ccdc101	chr7:133792822-133839381	gcKO	WT	OK	89.9223	153.558	0.585592	-0.772031	2.40835	8e-04	0.00694882	yes
1527	XLOC_002516	Gns	chr10:120802145-120834309	gcKO	WT	OK	13.4052	10.5962	1.2651	0.339252	-0.872204	0.12135	0.308565	no
1528	XLOC_027636	Med25	chr7:52132134-52148060	gcKO	WT	OK	27.7174	24.9291	1.11185	0.15296	-0.390136	0.48745	0.689806	no
1529	XLOC_021624	Vwa5b1	chr4:138124004-138179938	gcKO	WT	OK	22.2545	20.7601	1.07198	0.100283	-0.244972	0.6567	0.810253	no
1530	XLOC_021418	Klf17	chr4:117429263-117438271	gcKO	WT	OK	8.33475	9.59116	0.869003	-0.202568	0.527779	0.3665	0.588838	no
1531	XLOC_010442	Ttc23l	chr15:10429783-10488423	gcKO	WT	OK	43.6934	82.8574	0.527333	-0.923214	2.46086	5e-05	0.000597811	yes
1532	XLOC_000648	Wdr64	chr1:177628708-177745869	gcKO	WT	OK	34.0201	46.9239	0.725006	-0.463938	1.26093	0.0254	0.104307	no
1533	XLOC_033323	Prame	chrX:132147456-132162244	gcKO	WT	OK	2.59102	4.56555	0.567515	-0.817267	1.48919	0.0101	0.0532449	no
1534	XLOC_004427	Tcam1	chr11:106137974-106150020	gcKO	WT	OK	58.1771	74.0072	0.786101	-0.347214	0.866763	0.10825	0.289518	no
1535	XLOC_029386	Zfp821	chr8:112229448-112248834	gcKO	WT	OK	32.9232	49.9478	0.659152	-0.601319	1.54483	0.0049	0.0305733	yes
1536	XLOC_002844	Gstt4	chr10:75277686-75285288	gcKO	WT	OK	158.116	257.094	0.615012	-0.701315	1.89687	0.00105	0.00874246	yes
1537	XLOC_029600	Ap3m2	chr8:23897825-23916126	gcKO	WT	OK	1.99283	3.15958	0.630726	-0.664916	1.25497	0.0237	0.0990701	no
1538	XLOC_019729	Gpsm2	chr3:108456830-108525217	gcKO	WT	OK	7.29304	10.4923	0.695085	-0.524736	1.07607	0.07	0.218029	no
1539	XLOC_023709	Mtif3	chr5:147760232-147775373	gcKO	WT	OK	4.7351	5.28205	0.896451	-0.157703	0.311092	0.5731	0.753324	no
1540	XLOC_027798	Det1	chr7:85967874-85992097	gcKO	WT	OK	5.09661	4.19547	1.21479	0.280707	-0.555755	0.31035	0.535145	no
1541	XLOC_028857	1700019B03Rik	chr8:3470861-3487178	gcKO	WT	OK	16.0636	27.8751	0.576271	-0.795186	2.20797	0.00095	0.00806216	yes
1542	XLOC_012632	Lmf1	chr17:25716118-25799771	gcKO	WT	OK	37.5403	31.8465	1.17879	0.237306	-0.581859	0.2927	0.516632	no
1543	XLOC_010595	Trappc9	chr15:72420047-72893139	gcKO	WT	OK	21.9949	22.6473	0.971193	-0.0421687	0.0934642	0.86565	0.932495	no
1544	XLOC_006798	Atg2b	chr12:106851748-106923451	gcKO	WT	OK	5.67893	5.64706	1.00564	0.00811914	-0.0215674	0.96935	0.983921	no
1545	XLOC_010628	Eef1d	chr15:75725229-75739770	gcKO	WT	OK	142.539	203.575	0.700179	-0.514203	1.1935	0.02995	0.118015	no
1546	XLOC_008213	Ipo11	chr13:107584518-107727167	gcKO	WT	OK	10.6456	13.5317	0.786716	-0.346086	0.890583	0.112	0.29417	no
1547	XLOC_024572	Immt	chr6:71780963-71827668	gcKO	WT	OK	63.7018	88.5396	0.719472	-0.47499	1.30668	0.0238	0.0992127	no
1548	XLOC_023588	Wbscr28	chr5:135377462-135382603	gcKO	WT	OK	39.8741	40.4283	0.986292	-0.019912	0.0479427	0.93235	0.966648	no
1549	XLOC_000921	Mdh1b	chr1:63745389-63776892	gcKO	WT	OK	40.1583	64.9634	0.618168	-0.693927	1.89527	9e-04	0.00770815	yes
1550	XLOC_009168	Ttc18	chr14:21213411-21271447	gcKO	WT	OK	38.9037	64.887	0.599561	-0.738022	1.94417	5e-04	0.00457226	yes
1551	XLOC_000392	Clasp1	chr1:120285634-120506039	gcKO	WT	OK	29.674	47.6351	0.622944	-0.682826	0.788046	0.14515	0.3461	no
1552	XLOC_027508	Catsperg2	chr7:30482236-30512034	gcKO	WT	OK	20.6919	29.0421	0.712479	-0.489075	1.30995	0.02035	0.0878186	no
1553	XLOC_000697	Eprs	chr1:187186933-187252235	gcKO	WT	OK	17.7634	20.7833	0.854696	-0.226519	0.634071	0.28435	0.507992	no
1554	XLOC_023682	Usp42	chr5:144471189-144499026	gcKO	WT	OK	27.1766	24.3523	1.11598	0.158304	-0.430767	0.4569	0.667403	no
1555	XLOC_001428	Dtl	chr1:193361061-193399413	gcKO	WT	OK	11.6144	15.2139	0.763407	-0.389485	1.03637	0.06765	0.213274	no
1556	XLOC_017292	Ttll11	chr2:35606756-35835144	gcKO	WT	OK	14.9019	16.7249	0.891001	-0.1665	0.408499	0.49405	0.695034	no
1557	XLOC_011803	Ccdc116	chr16:17139103-17148950	gcKO	WT	OK	35.9676	44.6877	0.804866	-0.313179	0.796923	0.1665	0.374539	no
1558	XLOC_002231	Rab36	chr10:74499833-74516845	gcKO	WT	OK	5.15184	5.63984	0.913473	-0.130566	0.298409	0.61455	0.782319	no
1559	XLOC_013053	Ston1	chr17:89025894-89048032	gcKO	WT	OK	12.0623	12.067	0.999611	-0.000561294	0.00135714	0.99805	0.998607	no
1560	XLOC_006743	Kcnk10	chr12:99672184-99816150	gcKO	WT	OK	6.83107	9.14509	0.746966	-0.420887	0.987584	0.0704	0.219057	no
1561	XLOC_016287	Mbd5	chr2:48805027-49172589	gcKO	WT	OK	3.14932	2.78854	1.12938	0.175527	-0.421048	0.46165	0.671102	no
1562	XLOC_018936	Nup210l	chr3:89908053-90016245	gcKO	WT	OK	21.304	26.3896	0.807288	-0.30885	0.814672	0.15155	0.355058	no
1563	XLOC_006663	Pigh	chr12:80130149-80190657	gcKO	WT	OK	2.12857	3.31747	0.641624	-0.640197	0.526133	0.2887	0.512121	no
1564	XLOC_031614	Iqch	chr9:63269203-63450290	gcKO	WT	OK	45.2593	76.5305	0.591389	-0.757819	2.04802	0.00025	0.00244834	yes
1565	XLOC_013565	Gpr108	chr17:57374279-57387099	gcKO	WT	OK	18.682	24.4505	0.764074	-0.388218	0.947692	0.07545	0.230544	no
1566	XLOC_029798	Arhgap10	chr8:79774264-80042477	gcKO	WT	OK	9.19102	7.39188	1.24339	0.314284	-0.812655	0.18075	0.393486	no
1567	XLOC_012957	1700061G19Rik	chr17:57015055-57028261	gcKO	WT	OK	39.3175	53.9202	0.729179	-0.455652	1.34938	0.03075	0.120112	no
1568	XLOC_005287	Dhx58	chr11:100556197-100565585	gcKO	WT	OK	18.8081	30.0983	0.624889	-0.678327	1.95029	0.00195	0.0145829	yes
1569	XLOC_030037	Spata2l	chr8:125748660-125778075	gcKO	WT	OK	8.64037	6.94383	1.24432	0.315362	-0.351364	0.5669	0.748713	no
1570	XLOC_024726	Brpf1	chr6:113257087-113276870	gcKO	WT	OK	18.2492	19.4387	0.938808	-0.0910953	0.104061	0.85155	0.926324	no
1571	XLOC_025388	Brpf1	chr6:113257087-113276870	gcKO	WT	OK	5.95607	9.58169	0.62161	-0.685921	0.530694	0.3462	0.570041	no
1572	XLOC_012998	Clip4	chr17:72119010-72213550	gcKO	WT	OK	146.511	230.877	0.634585	-0.656117	1.41078	0.0093	0.0501429	no
1573	XLOC_000286	Armc9	chr1:88051350-88174859	gcKO	WT	OK	19.2681	34.4712	0.558962	-0.839179	2.08312	0.00025	0.00244834	yes
1574	XLOC_011362	4930562C15Rik	chr16:4835415-4868071	gcKO	WT	OK	20.6962	28.5988	0.723674	-0.466589	1.3109	0.02415	0.100306	no
1575	XLOC_012052	Hspa13	chr16:75747512-75767323	gcKO	WT	OK	11.1095	15.6125	0.711577	-0.490906	0.982133	0.095	0.267924	no
1576	XLOC_011359	Coro7	chr16:4626824-4679720	gcKO	WT	OK	5.7632	1.41594	4.07023	2.02511	-0.576288	0.45455	0.665751	no
1577	XLOC_011739	Coro7	chr16:4626824-4679720	gcKO	WT	OK	3.14653	3.05531	1.02986	0.0424425	-0.0558602	0.92335	0.963069	no
1578	XLOC_031744	Trim42	chr9:97249980-97270377	gcKO	WT	OK	17.2077	18.7659	0.916966	-0.125057	0.342968	0.57455	0.754178	no
1579	XLOC_028346	Nadsyn1	chr7:150981498-151008746	gcKO	WT	OK	7.11723	7.22801	0.984674	-0.0222829	0.0508867	0.92555	0.963775	no
1580	XLOC_006239	Dlst	chr12:86451782-86475292	gcKO	WT	OK	28.9875	33.7115	0.85987	-0.217811	0.567136	0.299	0.523224	no
1581	XLOC_020627	Agbl4	chr4:110070356-111330117	gcKO	WT	OK	27.6793	42.4974	0.651317	-0.618565	1.36985	0.0865	0.252016	no
1582	XLOC_008138	Spz1	chr13:93344583-93346348	gcKO	WT	OK	579.549	946.496	0.61231	-0.707667	1.54782	0.006	0.0358601	yes
1583	XLOC_006408	Dync1h1	chr12:111839342-111920829	gcKO	WT	OK	67.1824	81.3604	0.825738	-0.276243	0.533684	0.3427	0.567402	no
1584	XLOC_005187	Cdk5rap3	chr11:96769099-96777795	gcKO	WT	OK	41.8761	58.7889	0.712313	-0.489416	1.41556	0.0199	0.0873063	no
1585	XLOC_011810	Car15	chr16:17835368-17838279	gcKO	WT	OK	2.45157	2.93279	0.835917	-0.258569	0.270033	0.62915	0.791281	no
1586	XLOC_018808	Nbea	chr3:55429119-55987645	gcKO	WT	OK	1603.56	0	#DIV/0!	#VALUE!	NA	0.14575	0.34684	no
1587	XLOC_019412	Nbea	chr3:55429119-55987645	gcKO	WT	OK	4.95357	6.90976	0.716895	-0.480166	1.03864	0.0633	0.203389	no
1588	XLOC_010443	Rai14	chr15:10498609-10719878	gcKO	WT	OK	75.7036	85.4005	0.886454	-0.173883	0.439942	0.4516	0.662895	no
1589	XLOC_030750	Zfp202	chr9:39999900-40021189	gcKO	WT	OK	4.61339	4.78676	0.963781	-0.0532224	0.128487	0.82145	0.910668	no
1590	XLOC_022404	Acox3	chr5:35923875-35984199	gcKO	WT	OK	21.2609	21.6268	0.983081	-0.0246159	0.0570968	0.91815	0.960409	no
1591	XLOC_027845	9930013L23Rik	chr7:91081366-91235015	gcKO	WT	OK	6.42052	6.06999	1.05775	0.0809977	-0.181492	0.73815	0.861833	no
1592	XLOC_031808	Rad54l2	chr9:106590410-106691544	gcKO	WT	OK	6.33001	3.9908	1.58615	0.665531	-1.71947	0.0025	0.017948	yes
1593	XLOC_014469	Sil1	chr18:35425997-35658579	gcKO	WT	OK	55.8598	80.7421	0.69183	-0.531511	1.39662	0.01255	0.0629882	no
1594	XLOC_023302	Ankrd17	chr5:90656190-90795211	gcKO	WT	OK	7.45735	5.24537	1.4217	0.50762	-1.36049	0.01755	0.0794335	no
1595	XLOC_015634	Ide	chr19:37343230-37405103	gcKO	WT	OK	35.1951	51.4031	0.684688	-0.546481	1.56454	0.011	0.056938	no
1596	XLOC_010917	Krt8	chr15:101827141-101834773	gcKO	WT	OK	9.03192	9.55804	0.944955	-0.0816816	0.210817	0.7329	0.858616	no
1597	XLOC_003893	Trim17	chr11:58777278-58786600	gcKO	WT	OK	81.9664	126.04	0.650321	-0.620779	1.51979	0.0049	0.0305733	yes
1598	XLOC_024749	Ift122	chr6:115790714-115876754	gcKO	WT	OK	60.573	87.9662	0.688594	-0.538276	1.34242	0.0159	0.0745581	no
1599	XLOC_022478	Klb	chr5:65739625-65775244	gcKO	WT	OK	0.939292	0.971231	0.967115	-0.0482406	0.0591168	0.91165	0.957505	no
1600	XLOC_002615	Akap12	chr10:5987067-6080212	gcKO	WT	OK	272.543	390.206	0.698459	-0.517754	0.995108	0.0793	0.23808	no
1601	XLOC_019776	Ndst3	chr3:123229083-123375310	gcKO	WT	OK	6.06301	7.51907	0.806351	-0.310521	0.383021	0.50055	0.700101	no
1602	XLOC_013441	Pgk2	chr17:40343945-40345620	gcKO	WT	OK	366.679	620.989	0.590476	-0.760053	1.95212	0.00115	0.00945597	yes
1603	XLOC_004604	Kremen1	chr11:5091555-5161613	gcKO	WT	OK	4.72938	10.9901	0.430331	-1.21648	1.59254	0.00555	0.0337161	yes
1604	XLOC_031825	Rnf123	chr9:107951588-107981706	gcKO	WT	OK	18.5847	22.4645	0.827292	-0.27353	0.699637	0.23945	0.459615	no
1605	XLOC_000703	D1Pas1	chr1:188791294-188794506	gcKO	WT	OK	56.5859	81.3667	0.695443	-0.523996	1.53728	0.0131	0.0649019	no
1606	XLOC_017199	Inpp5e	chr2:26244867-26264708	gcKO	WT	OK	18.5772	17.9768	1.0334	0.0473942	-0.0817284	0.88065	0.940732	no
1607	XLOC_005172	Ngfr	chr11:95430126-95449012	gcKO	WT	OK	3.22975	4.42663	0.729618	-0.454788	0.964251	0.0759	0.2313	no
1608	XLOC_003745	Dock2	chr11:34126863-34597325	gcKO	WT	OK	48.8945	57.7638	0.846456	-0.240493	0.60487	0.3359	0.560503	no
1609	XLOC_003747	Dock2	chr11:34126863-34597325	gcKO	WT	OK	2.19551	0.686478	3.19822	1.67727	-0.132379	0.62095	0.786599	no
1610	XLOC_004709	Dock2	chr11:34126863-34597325	gcKO	WT	OK	2.05302	3.25347	0.631025	-0.664232	0.661293	0.2508	0.471493	no
1611	XLOC_000079	Cnnm4	chr1:36528441-36565621	gcKO	WT	OK	7.22307	5.83919	1.237	0.306843	-0.723179	0.1796	0.392043	no
1612	XLOC_011809	Med15	chr16:17651263-17723023	gcKO	WT	OK	19.373	16.7867	1.15407	0.206733	-0.533455	0.3469	0.570745	no
1613	XLOC_033234	Ophn1	chrX:95752639-96086324	gcKO	WT	OK	10.918	11.1604	0.97828	-0.0316787	0.0607719	0.9152	0.958988	no
1614	XLOC_002876	Agpat3	chr10:77731910-77815040	gcKO	WT	OK	55.4215	66.827	0.829328	-0.269984	0.657163	0.22295	0.443429	no
1615	XLOC_002421	Fgd6	chr10:93430844-93608084	gcKO	WT	OK	6.6841	10.5942	0.630921	-0.664475	1.51701	0.0081	0.0450259	yes
1616	XLOC_029987	Kars	chr8:114517270-114535205	gcKO	WT	OK	35.5625	48.8817	0.727522	-0.458938	1.24758	0.0286	0.114019	no
1617	XLOC_006790	Clmn	chr12:106001323-106103338	gcKO	WT	OK	6.02587	7.06185	0.853299	-0.228877	0.602092	0.27215	0.495823	no
1618	XLOC_006522	Allc	chr12:29238449-29267414	gcKO	WT	OK	198.821	319.92	0.621471	-0.686242	1.79124	0.00175	0.0134147	yes
1619	XLOC_007538	Cdk20	chr13:64529092-64541029	gcKO	WT	OK	20.4858	15.6672	1.30756	0.386876	-0.889592	0.1002	0.277297	no
1620	XLOC_008047	Cdk20	chr13:64529092-64541029	gcKO	WT	OK	1.93852	11.7094	0.165552	-2.59465	1.56215	0.0873	0.253553	no
1621	XLOC_011781	Pdxdc1	chr16:13819369-13949450	gcKO	WT	OK	82.7988	115.089	0.719433	-0.475073	1.23778	0.04005	0.146335	no
1622	XLOC_022849	Gtf2ird2	chr5:134659907-134694013	gcKO	WT	OK	5.02367	8.16916	0.614956	-0.701446	1.78145	0.0038	0.0252062	yes
1623	XLOC_012467	Tulp4	chr17:6106719-6241145	gcKO	WT	OK	35.0521	33.3841	1.04996	0.0703384	-0.157552	0.7794	0.885425	no
1624	XLOC_016175	Rapgef1	chr2:29461835-29596003	gcKO	WT	OK	18.4258	23.1151	0.797133	-0.327111	0.832737	0.12	0.306809	no
1625	XLOC_002559	Baz2a	chr10:127528182-127566359	gcKO	WT	OK	34.0202	22.7169	1.49757	0.582627	-1.3849	0.01165	0.0594707	no
1626	XLOC_006444	Mta1	chr12:114336488-114375654	gcKO	WT	OK	19.4263	18.4524	1.05278	0.0741999	-0.185361	0.7514	0.868623	no
1627	XLOC_006838	Mta1	chr12:114336488-114375654	gcKO	WT	OK	2.96569	3.32987	0.890632	-0.167098	0.125827	0.85025	0.925643	no
1628	XLOC_022703	Ube3b	chr5:114830615-114871178	gcKO	WT	OK	64.6671	62.1171	1.04105	0.0580427	-0.138569	0.7906	0.891977	no
1629	XLOC_029425	Necab2	chr8:121970618-121996536	gcKO	WT	OK	12.3687	10.7826	1.1471	0.197991	-0.443284	0.4368	0.64964	no
1630	XLOC_003133	Pip4k2c	chr10:126627382-126648678	gcKO	WT	OK	8.64936	8.70685	0.993397	-0.00955591	0.0124068	0.9823	0.990184	no
1631	XLOC_000504	Ivns1abp	chr1:153190560-153211575	gcKO	WT	OK	39.8886	54.8689	0.72698	-0.460014	1.10769	0.06605	0.209704	no
1632	XLOC_028080	Stk33	chr7:116422724-116582613	gcKO	WT	OK	113.529	153.022	0.741913	-0.430679	1.20889	0.0451	0.159184	no
1633	XLOC_012782	Bag6	chr17:35271694-35284410	gcKO	WT	OK	187.669	171.575	1.0938	0.129353	-0.289742	0.59435	0.76781	no
1634	XLOC_006689	Dpf3	chr12:84314737-84828686	gcKO	WT	OK	20.395	22.2098	0.918288	-0.122986	0.267003	0.6128	0.781358	no
1635	XLOC_009262	Ghitm	chr14:37933631-37948508	gcKO	WT	OK	69.1786	77.254	0.895469	-0.159284	0.428717	0.46575	0.674753	no
1636	XLOC_018012	Elmo2	chr2:165113421-165151979	gcKO	WT	OK	4.25702	3.98432	1.06844	0.0955084	-0.211445	0.7043	0.841115	no
1637	XLOC_018875	Fbxw7	chr3:84618843-84783120	gcKO	WT	OK	10.6612	13.4542	0.792407	-0.33569	0.867767	0.13305	0.327958	no
1638	XLOC_016662	Trim69	chr2:121945843-122011925	gcKO	WT	OK	66.9266	98.6589	0.678364	-0.559869	1.40565	0.0131	0.0649019	no
1639	XLOC_023674	Rnf216	chr5:143752570-143874699	gcKO	WT	OK	29.3303	31.1303	0.942179	-0.0859267	0.225639	0.67915	0.824924	no
1640	XLOC_004603	Emid1	chr11:5006268-5052225	gcKO	WT	OK	4.60084	2.9257	1.57256	0.653117	-1.22363	0.05555	0.185142	no
1641	XLOC_010239	Aco2	chr15:81702892-81756643	gcKO	WT	OK	54.7329	55.2941	0.989851	-0.014717	0.0406355	0.9451	0.972749	no
1642	XLOC_010530	Eif3h	chr15:51618085-51697021	gcKO	WT	OK	72.148	71.8352	1.00435	0.00626768	-0.0167024	0.97685	0.987225	no
1643	XLOC_017739	Ttbk2	chr2:120558551-120796451	gcKO	WT	OK	51.3393	57.6635	0.890326	-0.167596	0.391676	0.51325	0.709177	no
1644	XLOC_023710	Lnx2	chr5:147828230-147888148	gcKO	WT	OK	2.76104	2.23989	1.23267	0.301786	-0.665896	0.26335	0.48603	no
1645	XLOC_024327	Asb15	chr6:24478143-24523164	gcKO	WT	OK	3.14275	6.28595	0.499964	-1.0001	2.26584	1e-04	0.00104973	yes
1646	XLOC_005040	Nek8	chr11:77979605-77992107	gcKO	WT	OK	5.72141	8.31472	0.688106	-0.539297	1.28152	0.02065	0.0888081	no
1647	XLOC_001050	Pask	chr1:95206013-95264195	gcKO	WT	OK	34.3943	40.7779	0.843454	-0.245618	0.575403	0.31755	0.542459	no
1648	XLOC_030019	Zcchc14	chr8:124122602-124176220	gcKO	WT	OK	5.49154	4.07205	1.34859	0.431457	-1.05567	0.0603	0.196311	no
1649	XLOC_033224	Asb12	chrX:92665537-92753307	gcKO	WT	OK	6.99685	5.61847	1.24533	0.316528	-0.588884	0.29295	0.516632	no
1650	XLOC_029373	Vps4a	chr8:109554919-109569807	gcKO	WT	OK	66.9682	91.0012	0.735905	-0.44241	1.21307	0.03405	0.129951	no
1651	XLOC_025575	Dusp16	chr6:134665417-134757082	gcKO	WT	OK	6.08349	4.30594	1.41281	0.49857	-1.18839	0.032	0.123744	no
1652	XLOC_005436	Recql5	chr11:115753670-115827931	gcKO	WT	OK	9.81518	12.174	0.806241	-0.31072	0.578999	0.32215	0.547117	no
1653	XLOC_004549	Baiap2	chr11:119794349-119868098	gcKO	WT	OK	59.2119	75.4434	0.784852	-0.349508	0.726684	0.19365	0.410332	no
1654	XLOC_017806	Idh3b	chr2:130100147-130110204	gcKO	WT	OK	50.6259	56.2199	0.900498	-0.151206	0.25425	0.63975	0.798218	no
1655	XLOC_027141	Eps8l2	chr7:148524900-148551009	gcKO	WT	OK	1.1812	1.43181	0.82497	-0.277586	0.3904	0.5027	0.701529	no
1656	XLOC_021697	Mfn2	chr4:147234886-147279003	gcKO	WT	OK	60.0041	77.9426	0.76985	-0.377352	0.824022	0.1354	0.331829	no
1657	XLOC_004203	Mtmr4	chr11:87374482-87429801	gcKO	WT	OK	15.7643	19.8971	0.792291	-0.335898	0.610404	0.25935	0.481122	no
1658	XLOC_005125	Mtmr4	chr11:87374482-87429801	gcKO	WT	NOTEST	0.0680624	0.0241148	2.82243	1.49694	0	1	1	no
1659	XLOC_029111	Atp13a1	chr8:72314651-72331647	gcKO	WT	OK	9.43515	5.95203	1.5852	0.664662	-1.59643	0.00475	0.0298898	yes
1660	XLOC_024304	Glcci1	chr6:8459595-8547548	gcKO	WT	OK	16.7135	17.864	0.935597	-0.0960442	0.263134	0.6485	0.804381	no
1661	XLOC_031854	Dhx30	chr9:109986807-110020120	gcKO	WT	OK	74.0161	89.2181	0.829609	-0.269496	0.702392	0.21985	0.440156	no
1662	XLOC_020978	Acot7	chr4:151552208-151645964	gcKO	WT	OK	204.071	355.31	0.574346	-0.800007	2.05466	4e-04	0.00374925	yes
1663	XLOC_004181	Acaca	chr11:83993323-84215281	gcKO	WT	OK	15.1336	13.9639	1.08377	0.116049	-0.313558	0.58355	0.760744	no
1664	XLOC_002506	Grip1	chr10:118891369-119550021	gcKO	WT	OK	46.2884	64.046	0.722737	-0.468456	1.31628	0.0305	0.119582	no
1665	XLOC_016586	Slc12a6	chr2:112105962-112219298	gcKO	WT	OK	9.63854	9.6204	1.00189	0.00271713	-0.00565542	0.99265	0.995543	no
1666	XLOC_015383	Ndufv1	chr19:4007504-4012725	gcKO	WT	OK	86.0599	100.946	0.852534	-0.23017	0.761484	0.27035	0.493618	no
1667	XLOC_005167	Pdk2	chr11:94887571-94902685	gcKO	WT	OK	70.1917	50.5202	1.38938	0.474439	-1.30961	0.03645	0.136416	no
1668	XLOC_016200	Tor1b	chr2:30808520-30814678	gcKO	WT	OK	10.0771	10.6587	0.945434	-0.0809489	0.206545	0.72335	0.852277	no
1669	XLOC_014168	Cxxc5	chr18:35989471-36021350	gcKO	WT	OK	29.736	38.8006	0.76638	-0.38387	1.02549	0.07115	0.221035	no
1670	XLOC_010634	Puf60	chr15:75900452-75911376	gcKO	WT	OK	46.9512	63.2883	0.741862	-0.430776	1.18538	0.038	0.140625	no
1671	XLOC_017089	Prpf6	chr2:181336023-181390366	gcKO	WT	OK	22.0046	22.6241	0.972618	-0.0400563	0.12072	0.8502	0.925643	no
1672	XLOC_005052	Tmem97	chr11:78349878-78364275	gcKO	WT	OK	339.821	381.897	0.889824	-0.168408	0.383125	0.4941	0.695066	no
1673	XLOC_000252	Gmppa	chr1:75432517-75439751	gcKO	WT	OK	21.9097	20.0572	1.09236	0.127454	-0.311306	0.58235	0.759771	no
1674	XLOC_029070	Spata4	chr8:55686133-55695451	gcKO	WT	OK	453.032	719.251	0.629866	-0.666882	2.17019	0.00385	0.0254908	yes
1675	XLOC_026213	Kptn	chr7:16705224-16713010	gcKO	WT	OK	6.98025	6.23712	1.11915	0.162399	-0.326033	0.55575	0.740764	no
1676	XLOC_000879	Asnsd1	chr1:53401487-53409543	gcKO	WT	OK	73.5364	111.552	0.659212	-0.60119	1.7586	0.00445	0.028386	yes
1677	XLOC_008904	Dcaf11	chr14:56178786-56188903	gcKO	WT	OK	28.128	23.8455	1.17959	0.238287	-0.359082	0.47575	0.68271	no
1678	XLOC_023695	Ptcd1	chr5:145889518-145927973	gcKO	WT	OK	12.269	17.4624	0.702595	-0.509231	0.715429	0.19845	0.413492	no
1679	XLOC_028269	Tubgcp2	chr7:147181853-147226504	gcKO	WT	OK	33.1226	30.9597	1.06986	0.0974275	-0.247659	0.6842	0.827497	no
1680	XLOC_026924	Usp47	chr7:119167019-119254900	gcKO	WT	OK	53.2471	69.7668	0.763215	-0.389838	0.982774	0.08505	0.249149	no
1681	XLOC_015051	Zbtb3	chr19:8876985-8879483	gcKO	WT	OK	35.1609	28.3535	1.24009	0.310447	-0.780133	0.15475	0.358708	no
1682	XLOC_024463	Atp6v0e2	chr6:48487567-48491799	gcKO	WT	OK	3.04666	3.82745	0.796003	-0.329156	0.596311	0.33205	0.556778	no
1683	XLOC_015189	Il33	chr19:29999603-30035231	gcKO	WT	OK	2.32915	2.12261	1.0973	0.133962	-0.213965	0.7028	0.839763	no
1684	XLOC_029699	Wwc2	chr8:48911847-49075905	gcKO	WT	OK	24.6001	27.1718	0.905354	-0.143446	0.369427	0.50155	0.700719	no
1685	XLOC_007955	4833439L19Rik	chr13:54605165-54666743	gcKO	WT	OK	22.8675	13.9528	1.63892	0.712747	-1.19298	0.03865	0.142526	no
1686	XLOC_015407	Dpp3	chr19:4907228-4928287	gcKO	WT	OK	33.8503	37.3247	0.906914	-0.140965	0.397722	0.5066	0.704094	no
1687	XLOC_004236	Lrrc59	chr11:94491137-94515068	gcKO	WT	OK	33.903	34.102	0.994165	-0.00844511	0.0215767	0.9704	0.98431	no
1688	XLOC_001051	Hdlbp	chr1:95302514-95375385	gcKO	WT	OK	94.132	109.207	0.861959	-0.214306	0.517191	0.3559	0.579104	no
1689	XLOC_000800	Zfp451	chr1:33818595-33871846	gcKO	WT	OK	87.7489	120.621	0.727476	-0.459025	1.23034	0.03605	0.135282	no
1690	XLOC_000379	Phlpp1	chr1:108068261-108290824	gcKO	WT	OK	23.0222	25.0176	0.92024	-0.119923	0.301919	0.58805	0.763833	no
1691	XLOC_000066	Dst	chr1:34068669-34365497	gcKO	WT	OK	14.6573	16.0717	0.911994	-0.132905	0.349691	0.5384	0.728736	no
1692	XLOC_016850	Tm9sf4	chr2:152987034-153036199	gcKO	WT	OK	16.153	11.5792	1.395	0.48026	-1.15685	0.03015	0.118505	no
1693	XLOC_016629	Nusap1	chr2:119435267-119475896	gcKO	WT	OK	8.93106	13.1978	0.676708	-0.563396	1.06886	0.05895	0.193269	no
1694	XLOC_019680	Magi3	chr3:103817187-104024329	gcKO	WT	OK	3.74481	3.24033	1.15569	0.208749	-0.519543	0.3795	0.600431	no
1695	XLOC_019771	Usp53	chr3:122636510-122687408	gcKO	WT	OK	6.46307	5.62821	1.14833	0.199544	-0.519968	0.38975	0.609659	no
1696	XLOC_019678	Dclre1b	chr3:103604527-103613310	gcKO	WT	OK	1.76193	2.41671	0.729061	-0.455889	0.917067	0.12045	0.307521	no
1697	XLOC_020825	Pafah2	chr4:133952274-133983327	gcKO	WT	OK	19.1449	16.5535	1.15655	0.209827	-0.476676	0.3709	0.592949	no
1698	XLOC_020747	AU040320	chr4:126430798-126646748	gcKO	WT	OK	27.1997	28.5084	0.954094	-0.0677961	0.115529	0.83955	0.920015	no
1699	XLOC_022633	Lrrc8c	chr5:105948489-106039106	gcKO	WT	OK	5.56947	5.75988	0.966942	-0.0484987	0.105245	0.8457	0.92329	no
1700	XLOC_022335	Ube3c	chr5:29895733-30002617	gcKO	WT	OK	24.3309	27.422	0.887277	-0.172546	0.454742	0.4225	0.637085	no
1701	XLOC_022926	Eif3b	chr5:140895258-140919347	gcKO	WT	OK	133.773	188.521	0.709592	-0.494943	1.13475	0.0318	0.123179	no
1702	XLOC_022789	Mlxip	chr5:123844827-123907940	gcKO	WT	OK	4.43754	3.45401	1.28475	0.361488	-0.742725	0.17605	0.38735	no
1703	XLOC_024460	Krba1	chr6:48324372-48369916	gcKO	WT	OK	16.8912	18.1135	0.93252	-0.10079	0.255642	0.6469	0.803172	no
1704	XLOC_024652	Rpn1	chr6:88034466-88055298	gcKO	WT	OK	45.7599	64.2396	0.712332	-0.48938	1.38995	0.0221	0.0937757	no
1705	XLOC_028248	Dhx32	chr7:140901015-141416780	gcKO	WT	OK	21.9774	19.6333	1.11939	0.162716	-0.191872	0.7466	0.866023	no
1706	XLOC_026544	Vrk3	chr7:52003998-52032951	gcKO	WT	OK	52.7536	59.4127	0.887918	-0.171502	0.443742	0.41615	0.631147	no
1707	XLOC_027818	Unc45a	chr7:87470067-87485120	gcKO	WT	OK	5.23498	6.17667	0.847541	-0.238644	0.440695	0.4141	0.629406	no
1708	XLOC_029397	Cog4	chr8:113370923-113406134	gcKO	WT	OK	36.9965	45.6742	0.810009	-0.30399	0.891618	0.1455	0.346573	no
1709	XLOC_000999	Trip12	chr1:84717763-84897061	gcKO	WT	OK	134.565	161.499	0.833225	-0.263223	0.482293	0.42615	0.640436	no
1710	XLOC_031921	Ano10	chr9:122084991-122203541	gcKO	WT	OK	18.9975	20.9571	0.906495	-0.141625	0.351362	0.51555	0.711221	no
1711	XLOC_030824	Alg9	chr9:50581985-50651744	gcKO	WT	OK	8.73795	12.5976	0.69362	-0.527777	1.20372	0.0289	0.114959	no
1712	XLOC_031526	Alg9	chr9:50581985-50651744	gcKO	WT	OK	5.25262	4.16746	1.26039	0.333868	-0.270736	0.7642	0.876591	no
1713	XLOC_002943	Ncln	chr10:80949203-80959108	gcKO	WT	OK	28.646	23.1969	1.23491	0.304401	-0.825401	0.16895	0.378087	no
1714	XLOC_003724	Psme4	chr11:30671294-30780498	gcKO	WT	OK	70.6959	102.914	0.686942	-0.541739	1.36638	0.0183	0.0821326	no
1715	XLOC_004345	Tubg1	chr11:100957635-100987733	gcKO	WT	OK	16.0593	18.3732	0.874061	-0.194196	0.277101	0.6233	0.788129	no
1716	XLOC_005084	Pex12	chr11:83105200-83218542	gcKO	WT	OK	7.52626	11.3945	0.660517	-0.598338	0.347924	0.58135	0.759097	no
1717	XLOC_005211	Med1	chr11:98013468-98054771	gcKO	WT	OK	33.4652	31.9175	1.04849	0.0683115	-0.160629	0.77335	0.88232	no
1718	XLOC_006494	Ddx1	chr12:13226112-13255980	gcKO	WT	OK	68.2192	93.3286	0.730957	-0.452141	1.32892	0.0365	0.136542	no
1719	XLOC_008878	Abhd4	chr14:54873803-54889381	gcKO	WT	OK	125.914	82.4708	1.52677	0.610483	-1.49709	0.00675	0.0393959	yes
1720	XLOC_010229	Sgsm3	chr15:80808194-81021187	gcKO	WT	OK	37.6837	29.8354	1.26305	0.336917	-0.761218	0.20295	0.418907	no
1721	XLOC_010371	Letmd1	chr15:100299464-100309683	gcKO	WT	OK	5.80421	4.58733	1.26527	0.339444	-0.729058	0.1979	0.412963	no
1722	XLOC_011463	Psmd2	chr16:20651724-20663487	gcKO	WT	OK	126.716	147.79	0.857406	-0.221947	0.552677	0.3129	0.537549	no
1723	XLOC_012615	Ift140	chr17:25153030-25236442	gcKO	WT	OK	90.7508	109.795	0.826548	-0.274834	0.684777	0.24425	0.464407	no
1724	XLOC_014560	Hmgxb3	chr18:61290930-61336704	gcKO	WT	OK	11.7863	11.8987	0.990554	-0.013699	0.0348734	0.94875	0.974288	no
1725	XLOC_014573	Fbxo38	chr18:62663712-62901041	gcKO	WT	OK	24.1481	31.5742	0.764805	-0.386833	1.12037	0.0674	0.212673	no
1726	XLOC_015105	Lpxn	chr19:12838017-12908458	gcKO	WT	OK	26.0131	24.6947	1.05339	0.0750372	-0.0577768	0.9214	0.962074	no
1727	XLOC_014987	Brms1	chr19:5041403-5049917	gcKO	WT	OK	87.2472	111.137	0.785042	-0.349157	1.05659	0.09315	0.264488	no
1728	XLOC_003863	Galnt10	chr11:57428304-57601056	gcKO	WT	OK	16.2703	18.7123	0.869498	-0.20175	0.509754	0.3528	0.57615	no
1729	XLOC_004817	Galnt10	chr11:57428304-57601056	gcKO	WT	OK	12.2804	5.24648	2.34069	1.22693	-0.822627	0.3678	0.590247	no
1730	XLOC_020480	Rgs3	chr4:62220846-62364053	gcKO	WT	OK	19.9722	18.1587	1.09987	0.137329	-0.359212	0.51825	0.713369	no
1731	XLOC_021414	Kif2c	chr4:116832240-116855229	gcKO	WT	OK	63.1852	115.25	0.548245	-0.867104	2.1666	5e-05	0.000597811	yes
1732	XLOC_029791	Cherp	chr8:74948081-74999132	gcKO	WT	OK	13.3005	11.8523	1.12219	0.166314	-0.185557	0.7407	0.863085	no
1733	XLOC_025236	Usp39	chr6:72268669-72295169	gcKO	WT	OK	17.871	21.9239	0.815138	-0.294881	0.825149	0.1708	0.380633	no
1734	XLOC_022688	Hps4	chr5:112772114-112807444	gcKO	WT	OK	13.9129	21.6297	0.643231	-0.636589	1.60272	0.00645	0.0379536	yes
1735	XLOC_004081	Prpf8	chr11:75300278-75322951	gcKO	WT	OK	41.912	41.7517	1.00384	0.00552578	-0.0145714	0.98035	0.98925	no
1736	XLOC_002975	Stab2	chr10:86303954-86470687	gcKO	WT	OK	2.38248	3.11975	0.763677	-0.388963	0.728696	0.1934	0.410218	no
1737	XLOC_024828	Nop2	chr6:125081900-125094773	gcKO	WT	OK	20.1336	23.1962	0.86797	-0.204286	0.537837	0.3489	0.572498	no
1738	XLOC_005515	Csnk1d	chr11:120809797-120852650	gcKO	WT	OK	48.0825	54.9411	0.875164	-0.192375	0.449337	0.4245	0.63895	no
1739	XLOC_025551	Csda	chr6:131314875-131338468	gcKO	WT	OK	247.632	251.78	0.983525	-0.0239638	0.0635674	0.9157	0.959032	no
1740	XLOC_014436	Slc39a6	chr18:24738381-24762318	gcKO	WT	OK	11.0551	8.40477	1.31534	0.395433	-1.08629	0.07515	0.229963	no
1741	XLOC_000184	Carf	chr1:60133460-60208311	gcKO	WT	OK	7.73711	10.1224	0.764355	-0.387691	0.342544	0.54915	0.736343	no
1742	XLOC_022310	Agap3	chr5:23957994-24007865	gcKO	WT	OK	9.09012	6.1127	1.48709	0.57249	-1.32646	0.018	0.0809307	no
1743	XLOC_002326	Reep6	chr10:79784027-79799249	gcKO	WT	OK	125.738	142.006	0.885441	-0.175526	0.387948	0.49865	0.698728	no
1744	XLOC_025081	Braf	chr6:39553017-39675528	gcKO	WT	OK	5.76936	6.94167	0.83112	-0.266872	0.744599	0.20895	0.426352	no
1745	XLOC_014993	Catsper1	chr19:5335604-5344286	gcKO	WT	OK	29.0398	48.1023	0.603709	-0.728072	1.86406	8e-04	0.00694882	yes
1746	XLOC_018942	Gatad2b	chr3:90097935-90163547	gcKO	WT	OK	10.3011	12.5225	0.822607	-0.281714	0.614421	0.2799	0.503587	no
1747	XLOC_024782	Slc6a13	chr6:121243993-121287736	gcKO	WT	NOTEST	0.474882	0.776379	0.611663	-0.709192	0	1	1	no
1748	XLOC_025443	Slc6a13	chr6:121243993-121287736	gcKO	WT	OK	0.503394	2.89042	0.174159	-2.52152	1.37228	0.20935	0.426891	no
1749	XLOC_011407	2900011O08Rik	chr16:13981631-14101587	gcKO	WT	OK	11.7821	11.8291	0.996027	-0.00574207	0.0113357	0.98435	0.991256	no
1750	XLOC_018735	Zfp639	chr3:32408131-32419755	gcKO	WT	OK	22.4543	19.0334	1.17973	0.238455	-0.626801	0.2988	0.523093	no
1751	XLOC_022350	Tmem214	chr5:31172019-31179840	gcKO	WT	OK	42.9271	41.8628	1.02542	0.0362198	-0.099679	0.8653	0.93233	no
1752	XLOC_031057	Nmnat3	chr9:98187730-98311851	gcKO	WT	OK	64.2676	19.156	3.35496	1.74629	-4.19784	5e-05	0.000597811	yes
1753	XLOC_007848	Cdkal1	chr13:29417112-29947457	gcKO	WT	OK	22.4863	25.7037	0.874827	-0.192931	0.507632	0.3744	0.596079	no
1754	XLOC_015066	Rab3il1	chr19:10059661-10110210	gcKO	WT	OK	127.737	176.447	0.72394	-0.466059	0.938186	0.0851	0.249209	no
1755	XLOC_001321	Slamf7	chr1:173562033-173583168	gcKO	WT	OK	4.76675	8.45101	0.564045	-0.826117	2.04857	2e-04	0.00200239	yes
1756	XLOC_022369	Bre	chr5:32000422-32387112	gcKO	WT	OK	12.7405	19.4201	0.656047	-0.608128	1.3373	0.01055	0.0551427	no
1757	XLOC_009300	Dlgap5	chr14:48007453-48038082	gcKO	WT	OK	5.3881	6.57278	0.81976	-0.286726	0.6535	0.25015	0.470835	no
1758	XLOC_015613	Sgms1	chr19:32197216-32465674	gcKO	WT	OK	100.141	143.353	0.698562	-0.517541	1.26329	0.0523	0.177537	no
1759	XLOC_001442	Camk1g	chr1:195172539-195196476	gcKO	WT	OK	1.67219	2.09273	0.799047	-0.323645	0.497503	0.3928	0.612029	no
1760	XLOC_023546	Ccdc92	chr5:125079647-125342977	gcKO	WT	OK	136.732	183.33	0.745824	-0.4231	0.842634	0.14085	0.339489	no
1761	XLOC_005155	Spata20	chr11:94340154-94347606	gcKO	WT	OK	275.643	432.394	0.637481	-0.649545	1.46695	0.00895	0.0487265	yes
1762	XLOC_004361	Tmem106a	chr11:101443555-101453099	gcKO	WT	OK	2.99114	2.84705	1.05061	0.0712263	-0.135446	0.82295	0.911647	no
1763	XLOC_004366	Dhx8	chr11:101594037-101629771	gcKO	WT	OK	17.5821	22.1378	0.794212	-0.332405	0.890732	0.1157	0.300246	no
1764	XLOC_007243	Heatr1	chr13:12486966-12531207	gcKO	WT	OK	13.8236	13.7328	1.00661	0.00950621	-0.0254104	0.96305	0.980696	no
1765	XLOC_008941	Mtmr6	chr14:60884041-60921263	gcKO	WT	OK	55.2826	76.6879	0.720878	-0.472173	1.23398	0.03325	0.127537	no
1766	XLOC_010693	Ankrd54	chr15:78883511-78896024	gcKO	WT	OK	91.7771	126.666	0.72456	-0.464826	1.17025	0.03245	0.125022	no
1767	XLOC_010836	Senp1	chr15:97869129-97962926	gcKO	WT	OK	23.9318	24.8292	0.963857	-0.0531088	0.0721369	0.90165	0.951298	no
1768	XLOC_013478	Slc22a7	chr17:46569133-46575426	gcKO	WT	NOTEST	0.516243	0.699237	0.738295	-0.437729	0	1	1	no
1769	XLOC_014088	Mib1	chr18:10725507-10838840	gcKO	WT	OK	19.8501	27.8593	0.712513	-0.489013	1.41148	0.02595	0.105874	no
1770	XLOC_014402	Mib1	chr18:10725507-10838840	gcKO	WT	OK	2.5318	8.56894	0.295462	-1.75895	0.938774	0.3368	0.561743	no
1771	XLOC_014158	Reep2	chr18:35000242-35007117	gcKO	WT	OK	42.1333	37.8088	1.11438	0.156241	-0.408694	0.45975	0.670046	no
1772	XLOC_015430	Pcnxl3	chr19:5664634-5702864	gcKO	WT	OK	12.7274	8.16544	1.55869	0.640337	-1.29885	0.0196	0.0865294	no
1773	XLOC_017432	Zdhhc5	chr2:84518558-84555321	gcKO	WT	OK	82.0206	84.6117	0.969377	-0.0448705	0.104293	0.85055	0.925729	no
1774	XLOC_018011	Slc35c2	chr2:165102021-165113338	gcKO	WT	OK	9.18186	9.44321	0.972324	-0.0404916	0.0877519	0.86555	0.932479	no
1775	XLOC_019534	Msto1	chr3:88639152-88717872	gcKO	WT	OK	61.056	76.3339	0.799854	-0.322191	0.673095	0.2227	0.443142	no
1776	XLOC_022795	Hip1r	chr5:124423636-124453224	gcKO	WT	OK	10.2651	14.7256	0.697092	-0.520573	1.466	0.01585	0.0743931	no
1777	XLOC_024386	Trim24	chr6:37819964-37918445	gcKO	WT	OK	28.99	38.5126	0.752741	-0.409774	1.13186	0.05425	0.182114	no
1778	XLOC_024817	Lpcat3	chr6:124613121-124662196	gcKO	WT	OK	43.1455	47.3643	0.910929	-0.134589	0.330297	0.564	0.746571	no
1779	XLOC_006708	Nek9	chr12:86640463-86680312	gcKO	WT	OK	15.9012	17.6908	0.89884	-0.153862	0.428063	0.46515	0.674356	no
1780	XLOC_010207	Eif3l	chr15:78905555-78924832	gcKO	WT	OK	52.1536	65.0311	0.801979	-0.318363	0.837702	0.13005	0.322844	no
1781	XLOC_016215	Pomt1	chr2:32092118-32115625	gcKO	WT	OK	71.9587	70.1947	1.02513	0.0358075	-0.0903398	0.8805	0.940732	no
1782	XLOC_025365	Frmd4b	chr6:97236860-97567651	gcKO	WT	OK	5.1939	5.56378	0.93352	-0.0992463	0.239824	0.6707	0.819276	no
1783	XLOC_026682	Prc1	chr7:87439258-87461225	gcKO	WT	OK	29.383	40.2472	0.730063	-0.45391	1.22374	0.03765	0.139741	no
1784	XLOC_024626	Alms1	chr6:85537509-85652745	gcKO	WT	OK	22.4753	25.8946	0.867953	-0.204311	0.516795	0.35435	0.57778	no
1785	XLOC_007560	Nsun2	chr13:69750892-69774657	gcKO	WT	OK	58.8198	75.4936	0.779136	-0.360053	0.825034	0.1469	0.348652	no
1786	XLOC_023544	Eif2b1	chr5:125020222-125029066	gcKO	WT	OK	13.4457	14.9677	0.898314	-0.154709	0.417186	0.48485	0.688142	no
1787	XLOC_016635	Pla2g4b	chr2:119859168-119868768	gcKO	WT	OK	2.11492	1.20131	1.76051	0.815993	-1.42542	0.01765	0.0796565	no
1788	XLOC_021633	Pqlc2	chr4:138853919-138866615	gcKO	WT	OK	1.71711	1.61748	1.0616	0.086235	-0.112012	0.85435	0.927453	no
1789	XLOC_029241	Tnpo2	chr8:87560813-87581631	gcKO	WT	OK	22.4157	22.0174	1.01809	0.0258653	-0.052078	0.92005	0.961503	no
1790	XLOC_019764	Slc44a3	chr3:121162445-121235262	gcKO	WT	OK	1.09561	1.28885	0.850068	-0.234354	0.287263	0.635	0.795135	no
1791	XLOC_013208	Tbl3	chr17:24833178-24844598	gcKO	WT	OK	21.4498	23.9981	0.893812	-0.161957	0.332976	0.54655	0.734857	no
1792	XLOC_031481	Ube4a	chr9:44731081-44773683	gcKO	WT	OK	5.39602	5.73412	0.941037	-0.087676	0.222419	0.69115	0.832077	no
1793	XLOC_023080	Prkag2	chr5:24368552-24606566	gcKO	WT	OK	25.8937	39.7995	0.650604	-0.620151	1.69626	0.00635	0.0374617	yes
1794	XLOC_029362	Prmt7	chr8:108692729-108775890	gcKO	WT	OK	71.5408	85.3986	0.837728	-0.255446	0.531582	0.33765	0.562601	no
1795	XLOC_033171	Slc10a3	chrX:71614557-71618688	gcKO	WT	OK	2.57237	2.92234	0.880243	-0.184022	0.282452	0.60015	0.771613	no
1796	XLOC_013228	Chtf18	chr17:25854116-25864360	gcKO	WT	OK	5.93564	7.10059	0.835936	-0.258535	0.606147	0.281	0.504464	no
1797	XLOC_001232	Fam20b	chr1:158608680-158649047	gcKO	WT	OK	27.725	30.2975	0.915092	-0.12801	0.197249	0.7232	0.852277	no
1798	XLOC_003696	Wdpcp	chr11:21456694-21798689	gcKO	WT	OK	16.9244	21.6134	0.783051	-0.352823	0.656459	0.22825	0.449028	no
1799	XLOC_004177	Heatr6	chr11:83567138-83597256	gcKO	WT	OK	3.03096	2.82931	1.07127	0.0993248	-0.236723	0.683	0.827122	no
1800	XLOC_005351	Cdc27	chr11:104363842-104411934	gcKO	WT	OK	17.1448	25.6745	0.667775	-0.582565	1.67582	0.0064	0.0377301	yes
1801	XLOC_006245	Mfsd7c	chr12:87087488-87154535	gcKO	WT	OK	17.9301	15.4688	1.15911	0.213021	-0.523607	0.32115	0.54612	no
1802	XLOC_008677	Pxk	chr14:8930726-8998050	gcKO	WT	OK	12.4491	17.6903	0.703725	-0.506911	1.2768	0.0204	0.0879437	no
1803	XLOC_010284	Tbc1d22a	chr15:86044888-86328933	gcKO	WT	OK	12.1713	13.667	0.890561	-0.167215	0.384362	0.48155	0.686173	no
1804	XLOC_010782	Alg12	chr15:88635672-88657116	gcKO	WT	OK	6.71791	6.19182	1.08497	0.11765	-0.0858389	0.8886	0.944471	no
1805	XLOC_012895	Pex6	chr17:46848411-46862490	gcKO	WT	OK	15.0515	24.2149	0.62158	-0.68599	1.66479	0.00365	0.0243463	yes
1806	XLOC_015504	Dak	chr19:10666486-10704311	gcKO	WT	OK	86.7342	91.407	0.948879	-0.075703	0.107442	0.85675	0.928442	no
1807	XLOC_015350	Fam160b1	chr19:57435465-57464084	gcKO	WT	OK	10.2333	9.02601	1.13376	0.181119	-0.475214	0.399	0.616909	no
1808	XLOC_001128	Dyrk3	chr1:133024957-133034811	gcKO	WT	OK	78.5125	119.962	0.654478	-0.611582	1.68225	0.0044	0.0281313	yes
1809	XLOC_017229	Trub2	chr2:29631630-29643191	gcKO	WT	OK	3.45871	4.13801	0.835839	-0.258704	0.525712	0.369	0.591379	no
1810	XLOC_017756	Spg11	chr2:121854261-121944122	gcKO	WT	OK	4.78963	4.96484	0.96471	-0.0518342	0.0891772	0.874	0.937482	no
1811	XLOC_017934	Edem2	chr2:155527408-155555211	gcKO	WT	OK	11.5245	8.14633	1.41469	0.50048	-1.15616	0.03955	0.145184	no
1812	XLOC_019708	Ahcyl1	chr3:107466037-107499466	gcKO	WT	OK	13.1642	15.0416	0.875186	-0.192336	0.543012	0.3642	0.586945	no
1813	XLOC_024343	Ccdc136	chr6:29348925-29377009	gcKO	WT	OK	337.789	518.958	0.650899	-0.619495	1.30139	0.02425	0.100621	no
1814	XLOC_028192	Kif22	chr7:134170607-134185940	gcKO	WT	OK	5.3993	7.59162	0.711218	-0.491637	0.914978	0.0974	0.272187	no
1815	XLOC_027023	Prr14	chr7:134614141-134620353	gcKO	WT	OK	13.2962	13.2978	0.99988	-0.000178608	0.000425288	0.99915	0.999468	no
1816	XLOC_030036	Chmp1a	chr8:125728160-125736688	gcKO	WT	OK	41.5077	42.2229	0.983061	-0.0246459	0.0680274	0.9085	0.955475	no
1817	XLOC_031355	Zfp810	chr9:22081191-22112082	gcKO	WT	OK	2.22132	1.80014	1.23397	0.303302	-0.545959	0.3756	0.59727	no
1818	XLOC_030937	Herc1	chr9:66197185-66362400	gcKO	WT	OK	11.5992	11.5274	1.00623	0.00895042	-0.0240165	0.96795	0.983175	no
1819	XLOC_031801	Parp3	chr9:106372683-106378982	gcKO	WT	OK	308.724	596.126	0.517884	-0.949302	1.97408	0.00325	0.0223365	yes
1820	XLOC_031126	Camkv	chr9:107838250-107852022	gcKO	WT	OK	2.36185	2.43164	0.971299	-0.0420139	0.0758774	0.89155	0.946112	no
1821	XLOC_026470	Ankrd27	chr7:36371191-36424256	gcKO	WT	OK	6.89315	10.2273	0.673995	-0.569183	1.16177	0.03365	0.128776	no
1822	XLOC_004910	Odf4	chr11:68734642-68740682	gcKO	WT	OK	99.7439	110.423	0.903289	-0.146745	0.356482	0.50845	0.705377	no
1823	XLOC_017075	Arfgap1	chr2:180701929-180718303	gcKO	WT	OK	13.2123	13.6842	0.965515	-0.050632	0.125133	0.8196	0.909701	no
1824	XLOC_029933	Ranbp10	chr8:108292207-108375908	gcKO	WT	OK	10.0299	16.3028	0.615226	-0.70082	0.841501	0.1343	0.330164	no
1825	XLOC_006033	Grhl1	chr12:25257151-25302321	gcKO	WT	OK	4.27758	5.32776	0.802885	-0.316734	0.722398	0.20435	0.420553	no
1826	XLOC_005386	Wipi1	chr11:109434834-109472943	gcKO	WT	OK	10.4797	12.3759	0.846783	-0.239929	0.563464	0.3146	0.539327	no
1827	XLOC_029826	Cc2d1a	chr8:86656726-86696803	gcKO	WT	OK	11.3924	11.3683	1.00212	0.00305563	-0.00474979	0.99325	0.995867	no
1828	XLOC_011586	BC027231	chr16:44724413-44746526	gcKO	WT	OK	4.74552	4.65011	1.02052	0.0293018	-0.0578278	0.9276	0.964427	no
1829	XLOC_024827	Chd4	chr6:125046019-125080611	gcKO	WT	OK	42.8127	43.5442	0.983201	-0.0244427	0.064626	0.9101	0.95669	no
1830	XLOC_021259	Cdk5rap2	chr4:69884040-70071476	gcKO	WT	OK	42.3781	41.4905	1.02139	0.030539	-0.0825209	0.8828	0.941707	no
1831	XLOC_010236	L3mbtl2	chr15:81494365-81527717	gcKO	WT	OK	15.9549	16.5543	0.963792	-0.0532069	0.134718	0.81265	0.905749	no
1832	XLOC_030804	Bud13	chr9:46091094-46106866	gcKO	WT	OK	10.6439	6.68836	1.59141	0.670307	-1.58135	0.0077	0.0434368	yes
1833	XLOC_023599	Hip1	chr5:135881392-136021277	gcKO	WT	OK	5.7103	5.57268	1.0247	0.0351941	-0.089481	0.8726	0.93674	no
1834	XLOC_022864	Rhbdd2	chr5:136108523-136122332	gcKO	WT	OK	4.53011	4.53065	0.999881	-0.000171869	0.00039554	0.99925	0.999489	no
1835	XLOC_004918	Chd3	chr11:69156774-69182928	gcKO	WT	OK	9.87084	9.87876	0.999198	-0.00115738	0.00312265	0.9962	0.997948	no
1836	XLOC_005448	Srp68	chr11:116106479-116135550	gcKO	WT	OK	29.453	43.9369	0.670348	-0.577019	1.40756	0.01475	0.0704411	no
1837	XLOC_010926	Atf7	chr15:102364185-102455895	gcKO	WT	OK	5.72945	3.53154	1.62237	0.698102	-1.33895	0.01735	0.0786984	no
1838	XLOC_013602	BC027072	chr17:72092894-72102225	gcKO	WT	OK	0.667444	1.67247	0.399077	-1.32526	2.01619	0.0031	0.0215354	yes
1839	XLOC_000661	Cnst	chr1:181476659-181557609	gcKO	WT	OK	10.6927	12.7418	0.839183	-0.252936	0.639799	0.24605	0.466368	no
1840	XLOC_017311	Dennd1a	chr2:37631768-38145581	gcKO	WT	OK	3.9241	4.29448	0.913754	-0.130121	0.250267	0.6518	0.806841	no
1841	XLOC_016664	Sord	chr2:122060507-122091073	gcKO	WT	OK	625.067	1010.13	0.618799	-0.692454	1.36561	0.01785	0.0803714	no
1842	XLOC_020420	Tdrd7	chr4:45985144-46047643	gcKO	WT	OK	75.4973	108.843	0.693635	-0.52775	1.37118	0.0157	0.0739794	no
1843	XLOC_021422	Ipo13	chr4:117567097-117587604	gcKO	WT	OK	40.9154	44.7865	0.913565	-0.130419	0.352144	0.5388	0.728845	no
1844	XLOC_020809	Ahdc1	chr4:132567420-132634025	gcKO	WT	OK	15.2026	9.77328	1.55553	0.637407	-1.64499	0.0053	0.0324485	yes
1845	XLOC_022116	Ahdc1	chr4:132567420-132634025	gcKO	WT	OK	2.68255	2.61743	1.02488	0.0354528	-0.0273892	0.95735	0.977905	no
1846	XLOC_024635	C87436	chr6:86388305-86420387	gcKO	WT	OK	23.9414	32.9471	0.726662	-0.460645	1.24088	0.0305	0.119582	no
1847	XLOC_025484	Ncapd2	chr6:125117858-125141716	gcKO	WT	OK	30.5769	34.9541	0.874773	-0.193016	0.518703	0.37605	0.597607	no
1848	XLOC_027518	Wdr62	chr7:31025100-31065500	gcKO	WT	OK	106.538	111.28	0.957387	-0.0628318	0.146605	0.78585	0.889254	no
1849	XLOC_028175	Eif3c	chr7:133689967-133709915	gcKO	WT	OK	112.79	158.824	0.710157	-0.493789	1.28394	0.025	0.103069	no
1850	XLOC_029395	Vac14	chr8:113142537-113244301	gcKO	WT	OK	9.56881	6.13273	1.56029	0.64181	-0.884216	0.13075	0.324069	no
1851	XLOC_029976	Rfwd3	chr8:113794843-113824122	gcKO	WT	OK	26.3453	23.8074	1.1066	0.146132	-0.429004	0.4794	0.684818	no
1852	XLOC_030957	Zfp280d	chr9:72122705-72211640	gcKO	WT	OK	6.50428	6.74328	0.964557	-0.0520612	0.126413	0.8353	0.918041	no
1853	XLOC_011375	Mettl22	chr16:8458122-8490628	gcKO	WT	OK	37.8546	34.7682	1.08877	0.1227	-0.245222	0.6623	0.813743	no
1854	XLOC_011752	Mettl22	chr16:8458122-8490628	gcKO	WT	OK	19.1382	21.4803	0.890965	-0.166561	0.251902	0.69775	0.836754	no
1855	XLOC_016111	Pnpla7	chr2:24831552-24909592	gcKO	WT	OK	25.5067	25.2369	1.01069	0.0153382	-0.0407116	0.94595	0.973305	no
1856	XLOC_012766	Ehmt2	chr17:35035443-35050997	gcKO	WT	OK	84.1909	89.9304	0.936178	-0.0951444	0.237673	0.67175	0.81998	no
1857	XLOC_003758	Slu7	chr11:43247232-43261483	gcKO	WT	OK	5.74396	6.90291	0.832107	-0.26516	0.633922	0.2574	0.478777	no
1858	XLOC_023597	Pom121	chr5:135845822-135870416	gcKO	WT	OK	17.981	11.0872	1.62178	0.697582	-1.42437	0.0094	0.0505952	no
1859	XLOC_000237	Plcd4	chr1:74455957-74634602	gcKO	WT	OK	40.4148	51.3562	0.786951	-0.345654	0.535315	0.32655	0.551283	no
1860	XLOC_031198	Osbpl10	chr9:114908083-115141418	gcKO	WT	OK	43.1698	71.201	0.606309	-0.721877	1.89827	7e-04	0.00618284	yes
1861	XLOC_007988	Ubqln1	chr13:58277516-58317014	gcKO	WT	OK	22.3116	19.0154	1.17334	0.230631	-0.646079	0.2795	0.503264	no
1862	XLOC_033087	Arhgef6	chrX:54484661-54591906	gcKO	WT	OK	6.99815	8.38758	0.834347	-0.261281	0.641635	0.25935	0.481122	no
1863	XLOC_004587	Osbp2	chr11:3603563-3763906	gcKO	WT	OK	191.827	273.883	0.700398	-0.513758	1.19368	0.03625	0.135829	no
1864	XLOC_026587	Nomo1	chr7:53289065-53339582	gcKO	WT	OK	22.2433	17.9305	1.24053	0.310956	-0.797552	0.14385	0.344165	no
1865	XLOC_005973	Dnajc27	chr12:4082495-4113958	gcKO	WT	OK	41.5758	49.1971	0.845086	-0.242831	0.54567	0.3102	0.53496	no
1866	XLOC_022303	Nupl2	chr5:23670780-23689826	gcKO	WT	OK	11.7267	11.5301	1.01705	0.0243913	-0.0659321	0.9131	0.958067	no
1867	XLOC_010642	Oplah	chr15:76123618-76140230	gcKO	WT	OK	36.9716	37.565	0.984203	-0.0229729	0.0401963	0.94385	0.97198	no
1868	XLOC_017200	Sec16a	chr2:26264950-26301342	gcKO	WT	OK	13.2468	9.65033	1.37268	0.45699	-1.16062	0.04145	0.150032	no
1869	XLOC_017640	Nat10	chr2:103561280-103601407	gcKO	WT	OK	12.636	15.3019	0.82578	-0.27617	0.705369	0.19905	0.414193	no
1870	XLOC_015415	Pacs1	chr19:5132705-5273119	gcKO	WT	OK	47.5003	35.4392	1.34033	0.422589	-1.03669	0.0557	0.185568	no
1871	XLOC_024665	Txnrd3	chr6:89593981-89625523	gcKO	WT	OK	122.222	142.27	0.859085	-0.219128	0.566279	0.31975	0.544514	no
1872	XLOC_016650	Tubgcp4	chr2:120996941-121181011	gcKO	WT	OK	14.995	13.0038	1.15312	0.20555	-0.206286	0.7442	0.864596	no
1873	XLOC_022477	Wdr19	chr5:65590934-65651654	gcKO	WT	OK	11.8138	16.3735	0.72152	-0.470891	1.32028	0.02735	0.110373	no
1874	XLOC_025442	Mical3	chr6:120881563-121081040	gcKO	WT	OK	67.3592	114.585	0.587854	-0.766472	1.85503	0.00105	0.00874246	yes
1875	XLOC_029612	Adam32	chr8:25946609-26059330	gcKO	WT	OK	146.233	225.208	0.649324	-0.622989	1.70808	0.00485	0.0303442	yes
1876	XLOC_002233	Specc1l	chr10:74674817-74775145	gcKO	WT	OK	10.8326	11.103	0.975646	-0.035568	0.0800711	0.88165	0.941013	no
1877	XLOC_008974	Ints9	chr14:65431513-65658672	gcKO	WT	OK	9.87982	7.88254	1.25338	0.325825	-0.48551	0.37845	0.599487	no
1878	XLOC_006717	Pomt2	chr12:88447815-88505673	gcKO	WT	OK	15.7773	18.3697	0.858876	-0.219479	0.489845	0.3903	0.609988	no
1879	XLOC_015143	Trpm6	chr19:18824472-18967005	gcKO	WT	OK	7.64157	11.5913	0.65925	-0.601101	1.44556	0.01105	0.057185	no
1880	XLOC_020983	Nphp4	chr4:151851713-151937293	gcKO	WT	OK	6.44885	9.17063	0.703207	-0.50798	0.751267	0.1454	0.346401	no
1881	XLOC_006636	Rtn1	chr12:73312635-73509926	gcKO	WT	OK	11.3427	12.3348	0.919569	-0.120973	0.293627	0.58805	0.763833	no
1882	XLOC_019555	Ubap2l	chr3:89799375-89856527	gcKO	WT	OK	35.9976	37.4197	0.961996	-0.0558966	0.123661	0.82645	0.91347	no
1883	XLOC_010420	Nckap1l	chr15:103284169-103329237	gcKO	WT	OK	11.0286	16.0879	0.685521	-0.544726	1.41158	0.0106	0.055335	no
1884	XLOC_024778	Bcl2l13	chr6:120786247-120842860	gcKO	WT	OK	8.40274	7.20722	1.16588	0.221417	-0.572265	0.31325	0.538004	no
1885	XLOC_010344	Ccdc65	chr15:98538657-98553764	gcKO	WT	OK	98.0137	134.39	0.729323	-0.45537	1.36176	0.03115	0.121278	no
1886	XLOC_020657	Lrrc41	chr4:115748069-115796295	gcKO	WT	OK	80.362	62.5962	1.28382	0.360439	-0.90138	0.1234	0.311664	no
1887	XLOC_027916	Dnajb13	chr7:107641853-107663376	gcKO	WT	OK	119.284	178.073	0.66986	-0.578063	1.18875	0.04635	0.162455	no
1888	XLOC_000292	Dis3l2	chr1:88600378-88946821	gcKO	WT	OK	17.1428	14.8534	1.15413	0.206807	-0.43104	0.5267	0.720234	no
1889	XLOC_004373	BC030867	chr11:102110195-102126497	gcKO	WT	OK	7.88298	8.7315	0.902821	-0.14749	0.375126	0.5298	0.722546	no
1890	XLOC_023394	Gak	chr5:108998299-109089803	gcKO	WT	OK	15.7236	16.9157	0.929527	-0.105427	0.186515	0.7506	0.868355	no
1891	XLOC_023417	Noc4l	chr5:111077437-111082401	gcKO	WT	OK	10.3798	9.481	1.0948	0.130663	-0.323193	0.5854	0.761851	no
1892	XLOC_027638	Cpt1c	chr7:52214407-52230350	gcKO	WT	OK	29.6603	27.9079	1.06279	0.0878615	-0.218973	0.6893	0.830965	no
1893	XLOC_001159	Ipo9	chr1:137278891-137327068	gcKO	WT	OK	7.35756	8.73227	0.842571	-0.24713	0.643271	0.25065	0.471317	no
1894	XLOC_027136	Lrrc56	chr7:148379910-148401117	gcKO	WT	OK	39.4933	50.8159	0.777184	-0.363672	0.655219	0.2832	0.506658	no
1895	XLOC_025235	Atoh8	chr6:72156132-72185674	gcKO	WT	OK	37.1174	51.547	0.720069	-0.473794	1.23619	0.0243	0.100795	no
1896	XLOC_013182	Flywch1	chr17:23892351-23908558	gcKO	WT	OK	67.4523	98.4725	0.684986	-0.545853	1.4824	0.01015	0.0534636	no
1897	XLOC_011575	Igsf11	chr16:38892235-39027270	gcKO	WT	OK	15.5446	13.7664	1.12917	0.17526	-0.455982	0.41645	0.631411	no
1898	XLOC_005157	Mycbpap	chr11:94362337-94383110	gcKO	WT	OK	58.625	90.5606	0.647357	-0.627368	1.6094	0.00465	0.0294449	yes
1899	XLOC_007449	Iars	chr13:49777498-49829636	gcKO	WT	OK	6.99135	9.45322	0.739573	-0.435235	1.04703	0.057	0.188797	no
1900	XLOC_010626	Zc3h3	chr15:75584858-75672340	gcKO	WT	OK	15.0101	15.2308	0.98551	-0.0210562	0.0508316	0.91845	0.960591	no
1901	XLOC_022372	Plb1	chr5:32535053-32671189	gcKO	WT	OK	24.3706	32.0308	0.760849	-0.39432	0.676973	0.1995	0.414786	no
1902	XLOC_016933	Ift52	chr2:162843207-162871933	gcKO	WT	OK	16.9071	21.1861	0.798028	-0.325488	0.818225	0.13975	0.33781	no
1903	XLOC_027055	Wdr11	chr7:136735376-136779252	gcKO	WT	OK	14.0065	16.1463	0.867474	-0.205108	0.547121	0.32815	0.552832	no
1904	XLOC_031493	Sidt2	chr9:45745828-45763332	gcKO	WT	OK	27.2044	20.1793	1.34813	0.430965	-1.10214	0.04175	0.150792	no
1905	XLOC_004806	Slc36a3	chr11:54938320-54965303	gcKO	WT	OK	19.7178	22.0706	0.893397	-0.162627	0.363393	0.50515	0.702817	no
1906	XLOC_008749	Chdh	chr14:30822185-31340242	gcKO	WT	OK	11.3886	9.7739	1.16521	0.220583	-0.429199	0.46805	0.67692	no
1907	XLOC_000719	Lpgat1	chr1:193541902-193608134	gcKO	WT	OK	22.4503	27.3519	0.820795	-0.284909	0.550503	0.36625	0.588624	no
1908	XLOC_016212	Nup214	chr2:31829963-31943737	gcKO	WT	OK	17.2708	15.6202	1.10567	0.144921	-0.209555	0.7001	0.838371	no
1909	XLOC_027901	2210018M11Rik	chr7:105738048-105806457	gcKO	WT	OK	8.25616	8.41551	0.981065	-0.0275804	0.061915	0.91365	0.958283	no
1910	XLOC_027032	Rnf40	chr7:134716861-134747959	gcKO	WT	OK	45.623	56.4294	0.808497	-0.306685	0.341984	0.5694	0.750201	no
1911	XLOC_029419	Plcg2	chr8:120022190-120159042	gcKO	WT	OK	6.47984	7.81466	0.82919	-0.270225	0.639879	0.24545	0.465547	no
1912	XLOC_021177	Tex10	chr4:48206202-48486357	gcKO	WT	OK	35.2656	40.9182	0.861856	-0.214478	0.482761	0.39445	0.613117	no
1913	XLOC_021657	Dnajc16	chr4:141316225-141346598	gcKO	WT	OK	7.42509	7.3528	1.00983	0.0141147	-0.0337897	0.94785	0.974023	no
1914	XLOC_017197	Snapc4	chr2:26218245-26236301	gcKO	WT	OK	6.05157	3.70876	1.6317	0.706374	-1.61294	0.00395	0.0259885	yes
1915	XLOC_021214	AI314180	chr4:58811844-58925639	gcKO	WT	OK	13.8449	17.162	0.806718	-0.309859	0.847701	0.1508	0.354061	no
1916	XLOC_003705	Ahsa2	chr11:23206843-23399678	gcKO	WT	OK	112.549	232.34	0.484415	-0.910674	0.811629	0.20565	0.422156	no
1917	XLOC_004664	Ahsa2	chr11:23206843-23399678	gcKO	WT	OK	11.4723	14.3595	0.798935	-0.213789	0.350838	0.6939	0.833968	no
1918	XLOC_004966	Nup88	chr11:70658264-70796528	gcKO	WT	OK	55.5946	62.8933	0.883951	-0.177961	0.387918	0.5193	0.714071	no
1919	XLOC_005357	Limd2	chr11:105946186-106022831	gcKO	WT	OK	87.0068	137.782	0.631482	-0.663191	1.53231	0.00685	0.0398223	yes
1920	XLOC_017235	Ccbl1	chr2:30040641-30119314	gcKO	WT	OK	6.63843	7.49742	0.885429	-0.175553	0.21445	0.726	0.854118	no
1921	XLOC_005968	Asxl2	chr12:3365131-3506849	gcKO	WT	OK	8.34657	10.9114	0.76494	-0.386575	0.523378	0.35165	0.575026	no
1922	XLOC_000200	Fastkd2	chr1:63777198-63799959	gcKO	WT	OK	6.91159	11.2761	0.612942	-0.70618	1.78394	0.00205	0.0151861	yes
1923	XLOC_022740	Med13l	chr5:119010725-119215449	gcKO	WT	OK	7.10159	4.72547	1.50283	0.587684	-1.49063	0.0078	0.0439318	yes
1924	XLOC_010245	Ccdc134	chr15:81958351-81972632	gcKO	WT	OK	8.3331	17.5608	0.474528	-1.07544	2.75695	5e-05	0.000597811	yes
1925	XLOC_000996	Sphkap	chr1:83252355-83404775	gcKO	WT	OK	17.6544	27.6359	0.638821	-0.646516	1.73949	0.00255	0.0182548	yes
1926	XLOC_003653	Thoc5	chr11:4795345-4828868	gcKO	WT	OK	40.8768	64.1189	0.637516	-0.649466	1.94085	0.0016	0.0124549	yes
1927	XLOC_023023	A330021E22Rik	chr5:5580903-5664430	gcKO	WT	OK	67.3045	108.09	0.622671	-0.683459	2.04332	0.00165	0.0127808	yes
1928	XLOC_002920	Mob3a	chr10:80147997-80164565	gcKO	WT	OK	5.81924	5.45672	1.06644	0.0927977	-0.223964	0.7147	0.846852	no
1929	XLOC_031788	Nek11	chr9:105064796-105297640	gcKO	WT	OK	7.87527	10.4176	0.755958	-0.403626	0.948806	0.09455	0.267075	no
1930	XLOC_028126	Tmc7	chr7:125679357-125728224	gcKO	WT	OK	21.7436	36.3698	0.597848	-0.742151	1.98275	5e-04	0.00457226	yes
1931	XLOC_000412	Thsd7b	chr1:131169880-132115858	gcKO	WT	OK	8.93118	14.8749	0.600419	-0.735961	1.80282	0.0023	0.0167128	yes
1932	XLOC_004642	Cobl	chr11:12136678-12364963	gcKO	WT	OK	1.37576	1.54708	0.889262	-0.169312	0.323449	0.56245	0.745423	no
1933	XLOC_029825	Dcaf15	chr8:86587361-86628893	gcKO	WT	OK	39.3942	39.4988	0.997352	-0.00382613	0.00722578	0.98985	0.994164	no
1934	XLOC_029831	Zswim4	chr8:86734840-86760941	gcKO	WT	OK	8.45679	7.78248	1.08664	0.119879	-0.32379	0.59355	0.767369	no
1935	XLOC_019466	Zbbx	chr3:74841731-74969407	gcKO	WT	OK	61.1481	140.229	0.436059	-1.1974	3.29099	5e-05	0.000597811	yes
1936	XLOC_020892	Fbxo42	chr4:140703836-140759981	gcKO	WT	OK	4.18407	5.1957	0.805295	-0.312412	0.738916	0.1688	0.378054	no
1937	XLOC_031620	Dis3l	chr9:64154562-64189064	gcKO	WT	OK	66.579	99.958	0.66607	-0.586255	1.51	0.00695	0.040236	yes
1938	XLOC_017688	BC125332	chr2:112088099-112101582	gcKO	WT	OK	9.49664	15.5517	0.61065	-0.71158	1.73129	0.00125	0.0101127	yes
1939	XLOC_019146	Arhgap29	chr3:121656087-121720167	gcKO	WT	OK	57.4143	79.3481	0.723575	-0.466785	1.23046	0.0361	0.135388	no
1940	XLOC_025015	Iqub	chr6:24394864-24465067	gcKO	WT	OK	33.2239	51.0064	0.651367	-0.618456	1.86207	0.0028	0.0197407	yes
1941	XLOC_003014	Vezt	chr10:93430844-93608084	gcKO	WT	OK	4.39985	6.47769	0.679231	-0.558024	0.784163	0.1858	0.400111	no
1942	XLOC_023602	Tmem120a	chr5:136211359-136220042	gcKO	WT	OK	87.7033	108.899	0.805364	-0.312282	0.922229	0.13935	0.337265	no
1943	XLOC_002893	Polrmt	chr10:79198866-79209326	gcKO	WT	OK	6.98198	7.34621	0.950419	-0.0733652	0.18388	0.75335	0.870014	no
1944	XLOC_005444	Fbf1	chr11:116003550-116029678	gcKO	WT	OK	19.6977	23.9889	0.821117	-0.284341	0.753565	0.1732	0.38387	no
1945	XLOC_006202	Sipa1l1	chr12:83270970-83552771	gcKO	WT	OK	10.8237	9.23936	1.17148	0.228324	-0.586083	0.2738	0.49735	no
1946	XLOC_006255	Tmem63c	chr12:88362347-88431020	gcKO	WT	OK	4.70501	4.00681	1.17425	0.231745	-0.479274	0.3686	0.591115	no
1947	XLOC_006765	Itpk1	chr12:103806792-103943079	gcKO	WT	OK	14.2444	12.816	1.11145	0.15245	-0.396175	0.50055	0.700101	no
1948	XLOC_007689	Dhx29	chr13:113717706-113759640	gcKO	WT	OK	9.80807	12.7112	0.771609	-0.374056	0.994559	0.08425	0.247325	no
1949	XLOC_009287	Txndc16	chr14:45754122-45839069	gcKO	WT	OK	9.88993	11.5383	0.857139	-0.222404	0.584351	0.31265	0.53734	no
1950	XLOC_010261	Mpped1	chr15:83610452-83688904	gcKO	WT	OK	2.82988	1.32079	2.14257	1.09934	-1.70326	0.0088	0.0481394	yes
1951	XLOC_010762	Mpped1	chr15:83610452-83688904	gcKO	WT	OK	2.593	2.53915	1.02121	0.03028	-0.0211305	0.97055	0.984383	no
1952	XLOC_011908	1700021K19Rik	chr16:32821787-32868452	gcKO	WT	OK	18.8713	19.1009	0.98798	-0.0174401	0.0451893	0.936	0.968103	no
1953	XLOC_012734	Vps52	chr17:34092697-34104061	gcKO	WT	OK	35.1592	33.5083	1.04927	0.0693875	-0.172246	0.74755	0.866503	no
1954	XLOC_013538	Dpp9	chr17:56326104-56358312	gcKO	WT	OK	5.31332	3.72616	1.42595	0.511925	-1.19335	0.0439	0.15631	no
1955	XLOC_014433	Ino80c	chr18:24263259-24280320	gcKO	WT	OK	14.363	19.2333	0.746778	-0.421248	1.14474	0.0603	0.196311	no
1956	XLOC_000555	Dnm3	chr1:163917432-164410539	gcKO	WT	OK	1.43203	3.90657	0.36657	-1.44784	0.442384	0.50315	0.701667	no
1957	XLOC_001253	Dnm3	chr1:163917432-164410539	gcKO	WT	OK	20.4801	19.619	1.04389	0.0619725	-0.148619	0.81775	0.908651	no
1958	XLOC_000867	Slc39a10	chr1:46864387-46910354	gcKO	WT	OK	12.8311	17.5117	0.732716	-0.448676	1.26916	0.03435	0.130718	no
1959	XLOC_017234	D2Wsu81e	chr2:30027043-30033979	gcKO	WT	OK	56.9836	87.5825	0.650628	-0.620095	1.61198	0.0033	0.0224468	yes
1960	XLOC_017606	Gyltl1b	chr2:92205202-92211193	gcKO	WT	OK	2.93302	1.43395	2.04541	1.03239	-1.39994	0.01645	0.0763707	no
1961	XLOC_016636	Ganc	chr2:120181025-120330655	gcKO	WT	OK	2.55855	3.41986	0.748145	-0.418615	0.390807	0.5251	0.719143	no
1962	XLOC_018115	Samd10	chr2:181329886-181333852	gcKO	WT	OK	13.6346	14.3705	0.948791	-0.0758409	0.183827	0.738	0.861697	no
1963	XLOC_018754	4932438A13Rik	chr3:36761969-36951998	gcKO	WT	OK	23.241	27.8528	0.834422	-0.261148	0.607484	0.2865	0.510342	no
1964	XLOC_019489	D930015E06Rik	chr3:83702136-83844084	gcKO	WT	OK	14.7504	20.6356	0.714804	-0.484383	1.22968	0.02235	0.0946925	no
1965	XLOC_021142	Gba2	chr4:43575457-43600359	gcKO	WT	OK	24.2631	35.9914	0.674136	-0.568889	1.1107	0.06725	0.212333	no
1966	XLOC_020738	Oscp1	chr4:125735808-125766578	gcKO	WT	OK	117.173	200.571	0.584197	-0.775479	2.30217	2e-04	0.00200239	yes
1967	XLOC_020861	Eif4g3	chr4:137547580-137762994	gcKO	WT	OK	46.0896	55.6144	0.828735	-0.271019	0.670037	0.2359	0.456007	no
1968	XLOC_022723	Gcn1l1	chr5:116015269-116072663	gcKO	WT	OK	49.6791	48.2725	1.02914	0.0414364	-0.0922467	0.86125	0.93036	no
1969	XLOC_022763	Naa25	chr5:121847887-121891944	gcKO	WT	OK	20.8466	29.2274	0.713255	-0.48751	1.25892	0.0275	0.110687	no
1970	XLOC_023650	Adap1	chr5:139747829-139801418	gcKO	WT	OK	4.13124	5.48233	0.753556	-0.408213	0.823257	0.153	0.356957	no
1971	XLOC_027312	Grlf1	chr7:17079821-17200342	gcKO	WT	OK	17.5113	17.4851	1.0015	0.00216129	-0.00605636	0.99225	0.995261	no
1972	XLOC_026628	Mtmr10	chr7:71432301-71485706	gcKO	WT	OK	3.67805	3.72635	0.987038	-0.0188193	0.0454839	0.93885	0.969893	no
1973	XLOC_027039	Zfp646	chr7:135008872-135034484	gcKO	WT	OK	30.624	32.7814	0.934188	-0.098212	0.165835	0.74225	0.863627	no
1974	XLOC_028916	Arhgef10	chr8:14911716-15001085	gcKO	WT	OK	8.42837	11.5973	0.726753	-0.460462	0.983791	0.06395	0.204823	no
1975	XLOC_029123	Sugp2	chr8:72744091-72789000	gcKO	WT	OK	89.3164	115.175	0.775484	-0.366826	0.918448	0.1039	0.283538	no
1976	XLOC_031445	Gramd1b	chr9:40100816-40263767	gcKO	WT	OK	52.9744	64.4597	0.821822	-0.283104	0.626522	0.27345	0.497146	no
1977	XLOC_031512	Ttc12	chr9:49245065-49299452	gcKO	WT	OK	17.4608	23.4911	0.743294	-0.427998	1.1815	0.05195	0.176731	no
1978	XLOC_001998	Lrp11	chr10:7309597-7345275	gcKO	WT	OK	2.36833	2.42342	0.977268	-0.0331748	0.0692092	0.9133	0.958076	no
1979	XLOC_004257	Ttll6	chr11:95985411-96027137	gcKO	WT	OK	28.8381	40.7069	0.708433	-0.497295	1.28497	0.02075	0.0891313	no
1980	XLOC_005406	Sdk2	chr11:113642103-113927265	gcKO	WT	OK	4.49986	6.3232	0.711643	-0.490775	0.412551	0.40825	0.6249	no
1981	XLOC_005914	Sdk2	chr11:113642103-113927265	gcKO	WT	OK	2.53055	3.64726	0.693822	-0.527363	0.52316	0.42125	0.636002	no
1982	XLOC_008786	Antxrl	chr14:34864308-34915940	gcKO	WT	OK	33.6239	42.1112	0.798455	-0.324717	0.844214	0.1528	0.356756	no
1983	XLOC_010783	Ttll8	chr15:88720114-88786003	gcKO	WT	OK	79.9443	117.15	0.68241	-0.551296	1.31851	0.02795	0.112139	no
1984	XLOC_015603	9930021J03Rik	chr19:29788891-29880499	gcKO	WT	OK	7.44711	7.1128	1.047	0.066262	-0.181945	0.7579	0.872803	no
1985	XLOC_019846	Wdr63	chr3:145703489-145771000	gcKO	WT	OK	14.1958	22.6565	0.626566	-0.674463	1.86019	0.0017	0.0130994	yes
1986	XLOC_020394	Rgp1	chr4:43575457-43600359	gcKO	WT	OK	9.80598	8.18977	1.19734	0.259839	-0.306684	0.5847	0.761492	no
1987	XLOC_020909	Pramef8	chr4:143002328-143010990	gcKO	WT	OK	6.5827	7.6503	0.86045	-0.216838	0.535403	0.3583	0.581465	no
1988	XLOC_020991	Ttc34	chr4:154230308-154242807	gcKO	WT	OK	9.06657	15.0023	0.604345	-0.726557	1.65163	0.00395	0.0259885	yes
1989	XLOC_021751	Ttc34	chr4:154230308-154242807	gcKO	WT	OK	2.20071	4.97782	0.442103	-1.17754	0.863059	0.1042	0.283987	no
1990	XLOC_023007	Fry	chr5:151062504-151300328	gcKO	WT	OK	3.82331	2.29115	1.66873	0.738748	-1.59851	0.003	0.020945	yes
1991	XLOC_025061	Slc13a4	chr6:35217952-35258126	gcKO	WT	OK	2.90775	2.48344	1.17086	0.227562	-0.397515	0.4585	0.668807	no
1992	XLOC_027819	Man2a2	chr7:87493128-87516261	gcKO	WT	OK	20.163	12.9825	1.55309	0.635147	-1.32626	0.01515	0.0719682	no
1993	XLOC_029857	Abcc12	chr8:89028401-89104582	gcKO	WT	OK	29.5582	43.9833	0.672032	-0.573398	1.2201	0.0255	0.104598	no
1994	XLOC_029394	Hydin	chr8:112790786-113134249	gcKO	WT	OK	20.1073	19.1472	1.05014	0.0705904	-0.149801	0.7875	0.890159	no
1995	XLOC_029965	Hydin	chr8:112790786-113134249	gcKO	WT	OK	34.1073	81.4414	0.418796	-1.25568	1.12126	0.19945	0.414716	no
1996	XLOC_030589	Zfp317	chr9:19426534-19454175	gcKO	WT	OK	5.69432	7.43526	0.765854	-0.384859	0.929813	0.09755	0.272333	no
1997	XLOC_031560	C230081A13Rik	chr9:56048935-56266432	gcKO	WT	OK	4.36707	2.1991	1.98584	0.989755	-2.24433	5e-05	0.000597811	yes
1998	XLOC_004852	Zkscan17	chr11:59299019-59324569	gcKO	WT	OK	29.2563	33.1471	0.88262	-0.180139	0.460025	0.42175	0.636489	no
[truncated: 381 more rows]
