# Supplementary material
Source: publisher figshare collection journal article supplement (https://plos.figshare.com/articles/dataset/_/1259769)
Supplement: Supplementary file 1 [file 1 › Table_S7.xlsx]

## Sheet: Sheet1
Table S7. Sequences of primers used in this study.
Gene	Name	Forward	Reverse	length of amplicon(bp)
Bcl2l1	BCL2-like 1	CAAGTTCCCCCGGTCTCTTC	TAAGGTTCTGGCTGACTGCT	80
Ddx25	DEAD (Asp-Glu-Ala-Asp) box polypeptide 25	CTCTGCCTGGCTCCTACCTA	TGCCCCTTGGAATTCGGTTT	124
Catsper1	cation channel, sperm associated 1	CAGAAACGCAAAAAGGCCCA	AAGTCTGGGCCACAAGGATG	196
Catsper4	cation channel, sperm associated 4	AGGTTCTGCTTGGTTGGCTT	CACCCTGAGAGGGTAGGTGA	146
Klhl10	kelch-like 10 (Drosophila)	CGCCACAACACTCTATGGGA	GCCACCCACTGCGTATACAT	181
Kdm3a	lysine (K)-specific demethylase 3A	GCGAGGGGACGAACACTTA	CCCACCAATACTGGCCAACT	153
Mael	maelstrom homolog (Drosophila)	GGCATGACCAAGCAACTGTG	GCCTTATTTCTGATGCCCGC	147
Odf3	outer dense fiber of sperm tails 3	CTGCACAAGACTCCAGGTCC	GTAGGAGCACAGGGCTTGTT	179
Ybx2	similar to Y box protein 2; Y box protein 2	CTATCGAAGGCGGTTTGTGC	TGATCACCCTCCAATGGTGC	108
Spata16	spermatogenesis associated 16	GACATCAGTCAACAGGAGGCA	TCGAGCGGTTCTGAGTTTCT	186
Tssk1	testis-specific serine kinase 1	GCTCAGAGGACTCTCTGTCCA	GCATATGAGCCCTCTCCCAA	174
Tssk2	testis-specific serine kinase 2	CTACCGCATCCTACAGCCAG	TGAAGGAGGCAGAAGACATGG	110
Akap3	A kinase (PRKA) anchor protein 3	AGGGGTGGGTAGACTTAGGG	CAACCCTATCCGCCATCCTTA	103
Akap4	A kinase (PRKA) anchor protein 4	TCCAAAGGTCCAAAATGATTGCC	CAGCAGCACCCTTGGAATCT	198
Kif17	kinesin family member 17	AGGACATTACTGCCATGCGT	TGAGAATGGCCTCTGTCTCCT	93
Rab1b	RAB1B, member RAS oncogene family	AAGATCGACAGCACCCCTGT	CAGGACACCCCAAAGCTACA	154
Ranbp17	RAN binding protein 17	CTTGCTGCAATACCGGAAGC	CATGTGGTCCTGGGTGAGAC	70
Sin3a	transcriptional regulator, SIN3A (yeast)	CGCAAAGGAGGTTGCCAGTC	GGATGCACTACAAACCGCAAA	136
Xpo5	exportin 5	TGTCACATACAAGCCTGCGT	GTCCTGGGGGCCTTACTTTC	96
Tdrd6	tudor domain containing 6	ACGCCACCACCAAAGGTTTT	AGCACCGGGCTTGTTAAAGA	132
Tdrd7	tudor domain containing 7	CCACCTGCCTCAAGGCAATA	GCACCTGGCAGTAGAGTGTT	120
Prm1	Protamine 1	ATGGCCAGATACCGATGCTG	GCAGCATCTTCGCCTCCTC	114
Prm2	Protamine 2	GAGCGCGTAGAGGACTATGG	ATCTTCTGCAGCCTCTGCGAT	169
Tnp1	Transition protein 1	GAGGAGAGGCAAGAACCGAG	CGGTAATTGCGACTTGCATCA	120
Tnp2	transition protein 2	TCGACACTCACCTGCAAGAC	ATCCTGGAGTGCGTCACTTG	164
Isoform detection primers
Rfx2_For	CATTGTGTCTGGCGCAGGAG
Rfx2_Rev	CATTGACTGGCTCCAGCTTG
Usp19_For	CGCTTGTTTGATGACAGCAC
Usp19_Rev1	TCAGGTACCATCTCCTCCTC
Usp19_Rev2	CTCCATCAGCCAGGGACCTG
Plec-For1	CTGGGTGCAGATGGTACAGT
Plec-Rev1	GAGTGACAACATGACCCACG
Plec-For2	TCAGCGCATTGTGAGCAAGC
Plec-Rev2	CAGCAGGTCTTGCAGGTAGC
